# Supplementary material for: Dirhodium-catalyzed one-step cascade intermolecular 1,4-diamination via cyclopropanation
Source: Royal Society of Chemistry journal article supplement (doi:10.1039/d4qo00826j), 2024-01-01

**Dirhodium-Catalyzed One-Step Cascade Intermolecular 1,4-Diamination  
via Cyclopropanation**

Qi Yang,<sup>[a]</sup> Xinyu Liu,<sup>[b]</sup> Song Qin,<sup>[a]</sup> and Yuanhua Wang\*<sup>[a]</sup>

[a] College of Chemistry, Sichuan University, Chengdu 610041, China

[b] Chengdu Institute of Organic Chemistry, Chinese Academy of Sciences, Chengdu 610041, China

## Table of Contents

|                                                        |      |
|--------------------------------------------------------|------|
| 1. General Information .....                           | S3   |
| 2. Reaction Optimization.....                          | S4   |
| 3. Synthesis and Characterizations of Substrates ..... | S9   |
| 4. Synthesis and Characterizations of Products.....    | S32  |
| 5. X-Ray Crystallographic Data .....                   | S60  |
| 6. Computational Data.....                             | S66  |
| 7. References .....                                    | S114 |
| 8. NMR Spectra of Compounds .....                      | S118 |

## 1. General Information

If not explicitly stated, all reactions requiring anhydrous conditions were conducted by standard procedures under air atmosphere.  $\text{Rh}_2(\text{esp})_2$  and its derivatives was prepared as described.<sup>1</sup> Unless otherwise noted, all reagents were obtained from commercial suppliers and used without further purification. Yields reported are for isolated yields unless otherwise noted.  $^1\text{H}$  and  $^{13}\text{C}$  NMR spectra were obtained on a Bruker 400 spectrometer at 400 MHz and 101 MHz.  $^{19}\text{F}$  NMR spectra were obtained on a Bruker 400 spectrometer at 376 MHz. The  $^1\text{H}$  NMR (400 MHz) chemical shifts were recorded relative to  $\text{CDCl}_3$  as the internal reference ( $\text{CDCl}_3$ :  $\delta$  H = 7.26 ppm). The  $^{13}\text{C}$  NMR (101 MHz) chemical shifts were given using  $\text{CDCl}_3$  as the internal standard ( $\text{CDCl}_3$ :  $\delta$  C = 77.16 ppm).  $^1\text{H}$  NMR data are reported as: chemical shift (ppm), multiplicity (s = singlet, d = doublet, t = triplet, q = quartet, m = multiplet, dd = doublet of doublet, etc), and coupling constant (Hz). High resolution mass spectrometric measurements were carried out using a Bruker autoflex MALDITOF mass spectrometer and Waters-Q-TOF Premier (ESI). Melting points were recorded on a Buchi Melting Point B-545.

## 2. Reaction Optimization

**Table S1.** Selection of reaction temperature for the formation of 1,4-diamine from alkane.<sup>a</sup>

| Entry          | T(°C) | Yield of 2a <sup>b</sup> | Ratio(2a/3a) <sup>b</sup> | Ratio(2a/4a) <sup>b</sup> |
|----------------|-------|--------------------------|---------------------------|---------------------------|
| 1              | rt    |                          | No Reaction               |                           |
| 2              | 50    | 38%                      | >10/1                     | >10/1                     |
| 3              | 60    | 56%                      | >15/1                     | >10/1                     |
| 4              | 70    | 63%                      | >20/1                     | >10/1                     |
| 5              | 80    | 49%                      | >15/1                     | >10/1                     |
| 6 <sup>c</sup> | 70    | 62%                      | >20/1                     | >10/1                     |

<sup>a</sup>All reactions were performed with **1a** (0.4 mmol), Rh<sub>2</sub>(esp)<sub>2</sub> (0.004 mmol), NFSI (6 equiv, 2.4 mmol), NaHCO<sub>3</sub> (4 equiv, 1.6 mmol), CHCl<sub>3</sub> (2 mL), **Temperature**, 1 h under air. NFSI = N-Fluorobenzenesulfonamide. <sup>b</sup>As determined by <sup>1</sup>H NMR spectroscopy using C<sub>2</sub>H<sub>2</sub>Cl<sub>4</sub> as the internal standard. <sup>c</sup>Ar instead of air.

**Table S2.** Selection of reaction solvent for the formation of 1,4-diamine from alkane.<sup>a</sup>

| Entry | Solvent            | Yield of 2a <sup>b</sup> | Ratio(2a/3a) <sup>b</sup> | Ratio(2a/4a) <sup>b</sup> |
|-------|--------------------|--------------------------|---------------------------|---------------------------|
| 1     | DCE                | 40%                      | >20/1                     | >6/1                      |
| 2     | CHCl <sub>3</sub>  | 63%                      | >20/1                     | >10/1                     |
| 3     | DME                |                          | No Reaction               |                           |
| 4     | EA                 | 25%                      | >8/1                      | >10/1                     |
| 5     | CH <sub>3</sub> CN | 32%                      | >15/1                     | >10/1                     |

|    |             |     |             |       |
|----|-------------|-----|-------------|-------|
| 6  | 1,4-dioxane |     | No Reaction |       |
| 7  | THF         |     | No Reaction |       |
| 8  | MeOH        |     | No Reaction |       |
| 9  | acetone     | 19% | >8/1        | >10/1 |
| 10 | hexane      |     | No Reaction |       |
| 11 | DCM         | 37% | >10/1       | >10/1 |
| 12 | Ph          |     | No Reaction |       |

<sup>a</sup>All reactions were performed with **1a** (0.4 mmol), Rh<sub>2</sub>(esp)<sub>2</sub> (0.004 mmol), NFSI (6 equiv, 2.4 mmol), NaHCO<sub>3</sub> (4 equiv, 1.6 mmol), **Solvent** (2 mL), 70 °C, 1 h under air. NFSI = N-Fluorobenzenesulfonamide. <sup>b</sup>As determined by <sup>1</sup>H NMR spectroscopy using C<sub>2</sub>H<sub>2</sub>Cl<sub>4</sub> as the internal standard.

**Table S3.** Selection of reaction base for the formation of 1,4-diamine from alkane.<sup>a</sup>

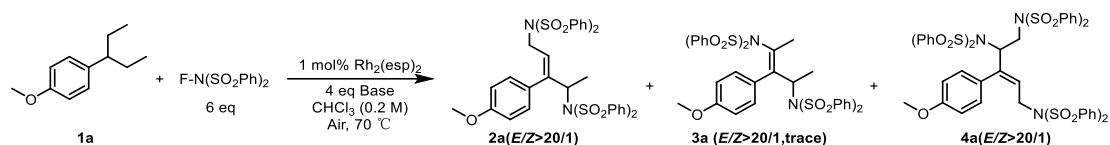

| Entry | Base                            | Yield of <b>2a</b> <sup>b</sup> | Ratio( <b>2a</b> / <b>3a</b> ) <sup>b</sup> | Ratio( <b>2a</b> / <b>4a</b> ) <sup>b</sup> |
|-------|---------------------------------|---------------------------------|---------------------------------------------|---------------------------------------------|
| 1     | No Base                         |                                 | No Reaction                                 |                                             |
| 2     | NaHCO <sub>3</sub>              | 63%                             | >20/1                                       | >10/1                                       |
| 3     | K <sub>2</sub> HPO <sub>4</sub> | 52%                             | >10/1                                       | >5/1                                        |
| 4     | KH <sub>2</sub> PO <sub>4</sub> | 49%                             | >15/1                                       | >5/1                                        |
| 5     | K <sub>3</sub> PO <sub>4</sub>  | 27%                             | >20/1                                       | >5/1                                        |
| 6     | NaOAc                           |                                 | trace                                       |                                             |
| 7     | Na <sub>2</sub> CO <sub>3</sub> | 47%                             | >10/1                                       | >6/1                                        |
| 8     | NaOH                            | 47%                             | >15/1                                       | >5/1                                        |
| 9     | K <sub>2</sub> CO <sub>3</sub>  | 41%                             | >10/1                                       | >6/1                                        |
| 10    | KOAc                            |                                 | trace                                       |                                             |
| 11    | MgO                             | 25%                             | >10/1                                       | >10/1                                       |

<sup>a</sup>All reactions were performed with **1a** (0.4 mmol), Rh<sub>2</sub>(esp)<sub>2</sub> (0.004 mmol), NFSI (6

equiv, 2.4 mmol), **Base** (4 equiv, 1.6 mmol), CHCl<sub>3</sub> (2 mL), 70 °C, 1 h under air. NFSI = N-Fluorobenzenesulfonamide. <sup>b</sup>As determined by <sup>1</sup>H NMR spectroscopy using C<sub>2</sub>H<sub>2</sub>Cl<sub>4</sub> as the internal standard.

**Table S4.** Selection of reaction catalyst for the formation of 1,4-diamine from alkane.<sup>a</sup>

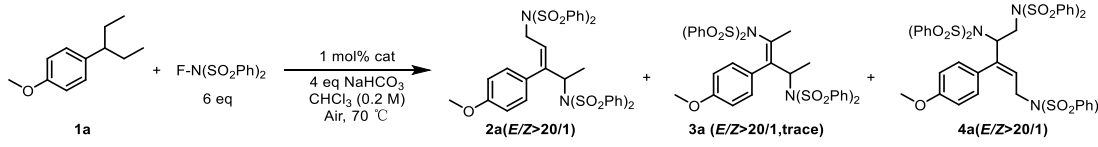

| Entry           | Catalyst                                 | Yield of 2a <sup>b</sup> | Ratio(2a/3a) <sup>b</sup> | Ratio(2a/4a) <sup>b</sup> |
|-----------------|------------------------------------------|--------------------------|---------------------------|---------------------------|
| 1               | Rh <sub>2</sub> (h-esp) <sub>4</sub>     | 41%                      | >20/1                     | >5/1                      |
| 2               | Rh <sub>2</sub> (3-Me-esp) <sub>2</sub>  | 50%                      | >15/1                     | >3/1                      |
| 3               | Rh <sub>2</sub> (3-tBu-esp) <sub>2</sub> | 52%                      | >20/1                     | >3/1                      |
| 4               | Rh <sub>2</sub> (oct) <sub>4</sub>       | 31%                      | >20/1                     | >10/1                     |
| 5               | Rh <sub>2</sub> (OPiv) <sub>4</sub>      | 36%                      | >20/1                     | >10/1                     |
| 6               | Rh <sub>2</sub> (5-Br-esp) <sub>2</sub>  | 31%                      | >10/1                     | >4/1                      |
| 7               | Rh <sub>2</sub> (TFA) <sub>4</sub>       |                          | No Reaction               |                           |
| 8               | Rh <sub>2</sub> (6-F-esp) <sub>2</sub>   | 44%                      | >20/1                     | >5/1                      |
| 9               | Rh <sub>2</sub> (esp) <sub>2</sub>       | 63%                      | >20/1                     | >10/1                     |
| 10 <sup>c</sup> | Rh <sub>2</sub> (esp) <sub>2</sub>       | 52%                      | >20/1                     | >10/1                     |
| 11              | Rh <sub>2</sub> (OAc) <sub>4</sub>       | 42%                      | >20/1                     | >10/1                     |
| 12              | No Catalyst                              |                          | No Reaction               |                           |
| 13              | Rh <sub>2</sub> (cap) <sub>4</sub>       |                          | No Reaction               |                           |
| 14              | FeCl <sub>3</sub>                        |                          | No Reaction               |                           |
| 15              | Cu(OAc) <sub>2</sub>                     |                          | No Reaction               |                           |
| 16              | Co(OAc) <sub>2</sub>                     |                          | No Reaction               |                           |
| 17              | Mn(OAc) <sub>2</sub>                     |                          | No Reaction               |                           |
| 18              | CuCl <sub>2</sub>                        |                          | No Reaction               |                           |
| 19              | Cu(acac) <sub>2</sub>                    |                          | No Reaction               |                           |
| 20              | Mn(acac) <sub>2</sub>                    |                          | No Reaction               |                           |

|    |                       |             |
|----|-----------------------|-------------|
| 21 | Ni(acac) <sub>2</sub> | No Reaction |
| 22 | Co(acac) <sub>2</sub> | No Reaction |
| 23 | Fe(acac) <sub>3</sub> | No Reaction |
| 24 | CuI                   | No Reaction |
| 25 | CuCl                  | No Reaction |

<sup>a</sup>All reactions were performed with **1a** (0.4 mmol), **Catalyst** (0.004 mmol), NFSI (6 equiv, 2.4 mmol), NaHCO<sub>3</sub> (4 equiv, 1.6 mmol), CHCl<sub>3</sub> (2 mL), 70°C, 1 h under air. NFSI = N-Fluorobenzenesulfonamide. <sup>b</sup>As determined by <sup>1</sup>H NMR spectroscopy using C<sub>2</sub>H<sub>2</sub>Cl<sub>4</sub> as the internal standard. <sup>c</sup>0.5 mol% Rh<sub>2</sub>(esp)<sub>2</sub> was used.

**Table S5.** Selection of NFSI equivalent for the formation of 1,4-diamine from alkane.<sup>a</sup>

| Entry | X equiv | Yield of <b>2a</b> <sup>b</sup> | Ratio( <b>2a</b> / <b>3a</b> ) <sup>b</sup> | Ratio( <b>2a</b> / <b>4a</b> ) <sup>b</sup> |
|-------|---------|---------------------------------|---------------------------------------------|---------------------------------------------|
| 1     | 3       | 56%                             | >20/1                                       | >10/1                                       |
| 2     | 4       | 66%                             | >20/1                                       | >10/1                                       |
| 3     | 5       | 68%                             | >20/1                                       | >10/1                                       |
| 4     | 6       | 63%                             | >20/1                                       | >10/1                                       |

<sup>a</sup>All reactions were performed with **1a** (0.4 mmol), **catalyst** (0.004 mmol), NFSI (x equiv), NaHCO<sub>3</sub> (4 equiv, 1.6 mmol), CHCl<sub>3</sub> (2 mL), 70°C, 1 h under air. NFSI = N-Fluorobenzenesulfonamide. <sup>b</sup>As determined by <sup>1</sup>H NMR spectroscopy using C<sub>2</sub>H<sub>2</sub>Cl<sub>4</sub> as the internal standard.

**Table S6.** Selection of NaHCO<sub>3</sub> equivalent for the formation of 1,4-diamine from alkane.<sup>a</sup>

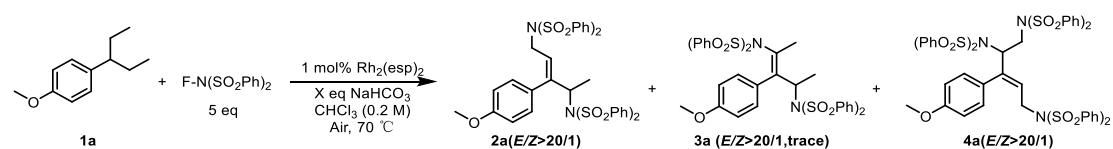

| Entry | X equiv | Yield of 2a <sup>b</sup> | Ratio(2a/3a) <sup>b</sup> | Ratio(2a/4a) <sup>b</sup> |
|-------|---------|--------------------------|---------------------------|---------------------------|
| 1     | 3       | 48%                      | >20/1                     | >10/1                     |
| 2     | 4       | 68%                      | >20/1                     | >10/1                     |
| 3     | 5       | 60%                      | >20/1                     | >10/1                     |
| 4     | 6       | 58%                      | >20/1                     | >10/1                     |

<sup>a</sup>All reactions were performed with **1a** (0.4 mmol), Rh<sub>2</sub>(esp)<sub>2</sub> (0.004 mmol), NFSI (6 equiv, 2.4 mmol), NaHCO<sub>3</sub> (x equiv), CHCl<sub>3</sub> (2 mL), 70°C, 1 h under air. NFSI = N-Fluorobenzenesulfonamide. <sup>b</sup>As determined by <sup>1</sup>H NMR spectroscopy using C<sub>2</sub>H<sub>2</sub>Cl<sub>4</sub> as the internal standard.



### 3. Synthesis and Characterizations of Substrates

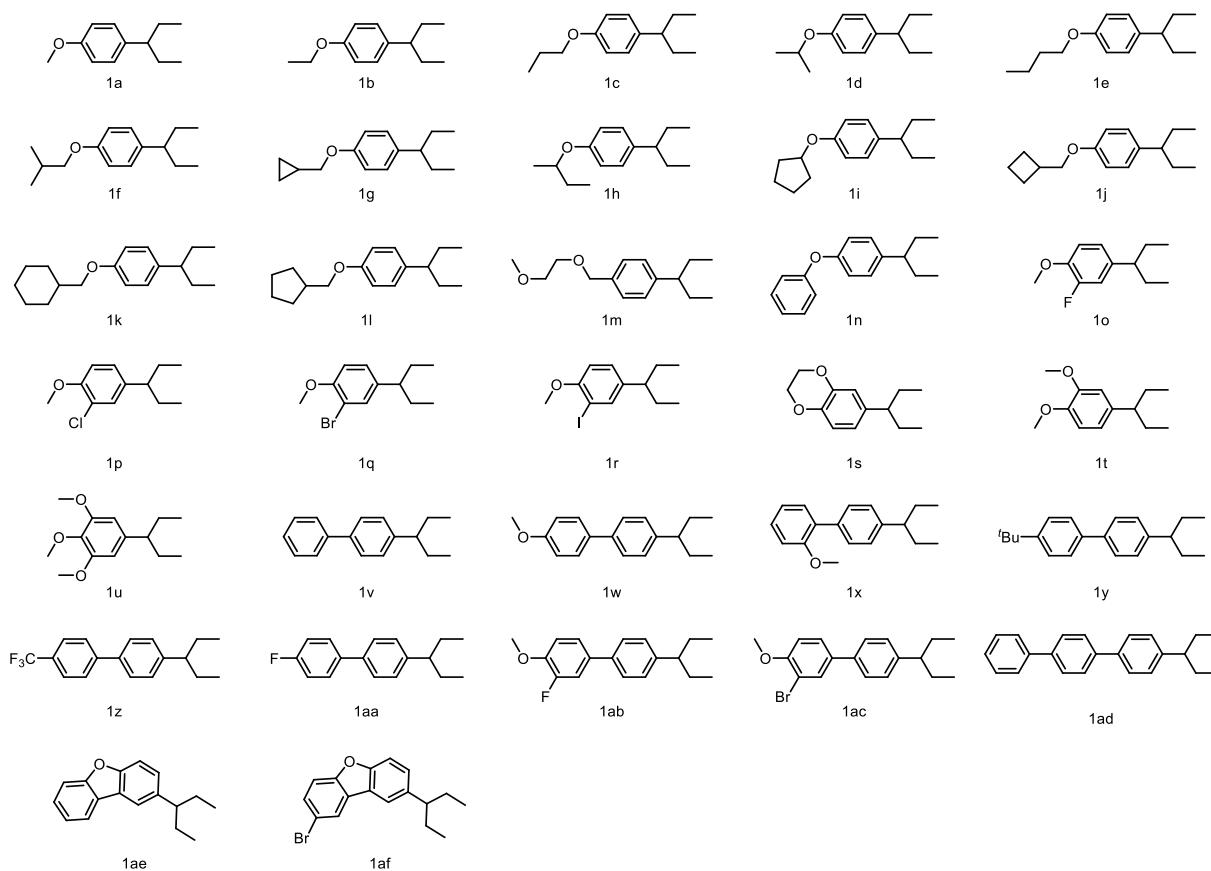

#### 3.1: General procedure 1 for the synthesis of 1a-1p, 1s-1ab, 1ad-1af<sup>2</sup>

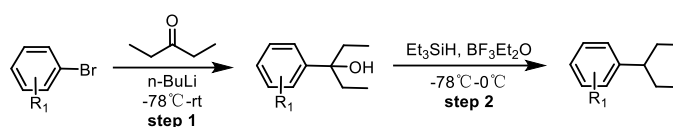

**Step 1:** Following a general procedure, to a flame-dried RBF fitted with a septum seal was added a solution of aryl halide (1.0 equiv) in THF (0.3 M). The mixture was cooled to  $-78^{\circ}\text{C}$ , and a solution of n-BuLi (2.5 M in hexanes, 1.3 equiv) was added dropwise. The solution was left to stir for 30 min before adding a solution of the 3-Pentanone (10 mmol, 1.0 equiv) in THF (1.0 M) dropwise. The reaction mixture was left to stir for 1-3 h, while warming to rt. Water was added dropwise, followed by extraction with EtOAc ( $\times 3$ ). The combined organics were dried  $\text{Na}_2\text{SO}_4$ , filtered, and concentrated under reduced pressure. The crude material was purified by silica gel chromatography to yield the desired product.

**Step 2:** Following a general procedure, a round-bottom flask was flame-dried and then cooled under argon. The tertiary alcohol (1.0 equiv) was added followed by dry DCM (0.25 M to the tertiary alcohol). Triethylsilane (2.0 equiv) was added, and then the reaction mixture was cooled to  $-78^{\circ}\text{C}$ . Once the mixture was cooled,  $\text{BF}_3 \cdot \text{Et}_2\text{O}$  (3.2 equiv) was added dropwise. The reaction mixture was stirred at  $-78^{\circ}\text{C}$  for 30 minutes, and then was stirred at  $-40^{\circ}\text{C}$  for 30 minutes and then was stirred at  $0^{\circ}\text{C}$  for 60 minutes. The reaction mixture was slowly quenched by an equal volume of saturated sodium bicarbonate at  $0^{\circ}\text{C}$ . The layers were separated, and then the aqueous layer was extracted with DCM ( $\times 3$ ). The combined organics were dried  $\text{Na}_2\text{SO}_4$ , filtered, and concentrated under reduced pressure. The crude material was purified by silica gel chromatography to yield the desired product.

### 3.2: General procedure 1 for the synthesis of 1q and 1ac<sup>3</sup>

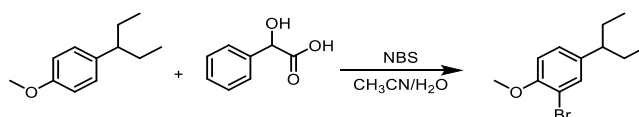

Following a general procedure, to a flame-dried RBF was added NBS (1.2 equiv), mandelic acid (20 mol %), and an aromatic compound (1.0 equiv). MeCN /  $\text{H}_2\text{O}$  (1/1, 0.1 M) were then added. The reaction was then stirred at room temperature until completed, as judged by TLC. Upon completion, the reaction was diluted with ethyl acetate and added a saturated  $\text{NaHCO}_3$  solution. The aqueous phase was extracted with ethyl acetate ( $\times 3$ ) and the combined organic layers were dried over  $\text{Na}_2\text{SO}_4$ , filtered, and carefully concentrated in vacuo. The crude material was purified by silica gel chromatography to yield the desired product.

### 3.3: General procedure 1 for the synthesis of 1r<sup>4</sup>

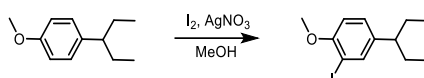

Following a general procedure, to a mixture of  $\text{I}_2$  (1.0 equiv) in methanol (1.8 M) at room temperature was added  $\text{AgNO}_3$  (1.0 equiv). Aromatic compound (1.0 equiv) in methanol (1.8 M) was added and the mixture was stirred at room temperature 15 hours before being filtered over celite (rinsed with  $\text{CH}_2\text{Cl}_2$ ). Water was added, followed by

saturated  $\text{Na}_2\text{S}_2\text{O}_3$  until discoloration, and the solution was extracted with DCM ( $\times 2$ ).

The combined organic layers were dried over  $\text{Na}_2\text{SO}_4$ , filtered and the filtrate was concentrated under reduced pressure. The crude material was purified by silica gel chromatography to yield the desired product.

### 3.4: General procedure 1 for the synthesis of 1D<sup>5</sup>

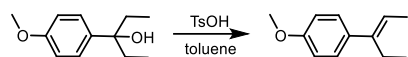

Following a general procedure, TsOH (0.1 equiv) was added to a solution of tertiary alcohol (1.0 equiv) in dry toluene (0.2 M) under argon atmosphere, and this solution was heated to reflux. After 4 hours, the reaction mixture was cooled to rt, the solution was washed with saturated  $\text{NaHCO}_3$ , and the organic layer was dried over  $\text{Na}_2\text{SO}_4$ , filtered and the filtrate was concentrated under reduced pressure. The crude material was purified by silica gel chromatography to yield the desired product.

### 3.5: General procedure 1 for the synthesis of 1D-T<sup>6</sup>

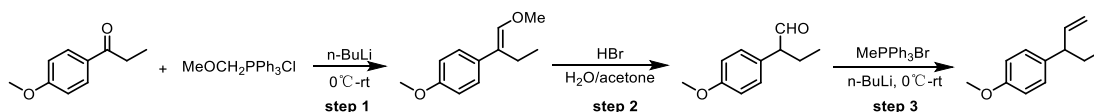

**Step 1:** Following a general procedure, (methoxymethyl)triphenylphosphonium chloride (1.6 equiv) was suspended in anhydrous THF (0.2 M) and the resultant mixture was cooled to  $0^\circ\text{C}$ . Slowly by syringe,  $n\text{-BuLi}$  (2.5 M in hexanes, 1.6 equiv) was added to the stirring phosphonium chloride solution under an atmosphere of  $\text{N}_2$ . The reaction was allowed to stir under  $\text{N}_2$  at  $0^\circ\text{C}$  for 30 min, then at  $23^\circ\text{C}$  for 30 min, at which point the solution turned deep red. Then, the mixture was recooled to  $0^\circ\text{C}$ , and 4'-methoxyphenylacetone in minimal anhydrous THF (0.2 M) was added dropwise by syringe. After stirring under  $\text{N}_2$  for 4 h, the reaction was quenched with  $\text{H}_2\text{O}$ . The layers were separated and the aqueous phase was extracted with ethyl acetate ( $\times 3$ ) and the combined organic layers were dried over  $\text{Na}_2\text{SO}_4$ , filtered, and concentrated in vacuo. The crude material was purified by silica gel chromatography to yield the desired product.

**Step 2:** Following a general procedure, enol ether (1.0 equiv) was dissolved in a 4:1 mixture of acetone and  $\text{H}_2\text{O}$  (0.9 M) and the resultant solution was cooled to  $0^\circ\text{C}$  in an

ice bath. Conc. HBr (48%, 5.0 equiv) was added to the solution and the reaction mixture was stirred at 23°C for 4 h. The aqueous was neutralized with saturated NaHCO<sub>3</sub> solution, as determined by pH paper. This aqueous solution was then extracted with DCM (×2). The combined organic layers were dried over Na<sub>2</sub>SO<sub>4</sub>, filtered and the filtrate was concentrated under reduced pressure. The crude material was purified by silica gel chromatography to yield the desired product.

**Step 3:** Following a general procedure, Methyltriphenylphosphonium bromide (1.6 equiv) was suspended in anhydrous THF (0.2 M) and the resultant mixture was cooled to 0°C. Slowly by syringe, n-BuLi (2.5 M in hexanes, 1.6 equiv) was added to the stirring phosphonium chloride solution under an atmosphere of N<sub>2</sub>. The reaction was allowed to stir under N<sub>2</sub> at 0°C for 30 min, then at 23°C for 30 min, at which point the solution turned deep red. Then, the mixture was recooled to 0°C, and Aromatic aldehyde compound in minimal anhydrous THF (0.2M) was added dropwise by syringe. After stirring under N<sub>2</sub> for 4 h, the reaction was quenched with H<sub>2</sub>O. The layers were separated and the aqueous phase was extracted with ethyl acetate (×3) and the combined organic layers were dried over Na<sub>2</sub>SO<sub>4</sub>, filtered, and concentrated in vacuo. The crude material was purified by silica gel chromatography to yield the desired product.

### 3.6: Unsuccessful substrates

The substrate **1ag-1ai** has been reported in the previous literature.<sup>7-9</sup> The structures of these unsuccessful substrates are listed below.

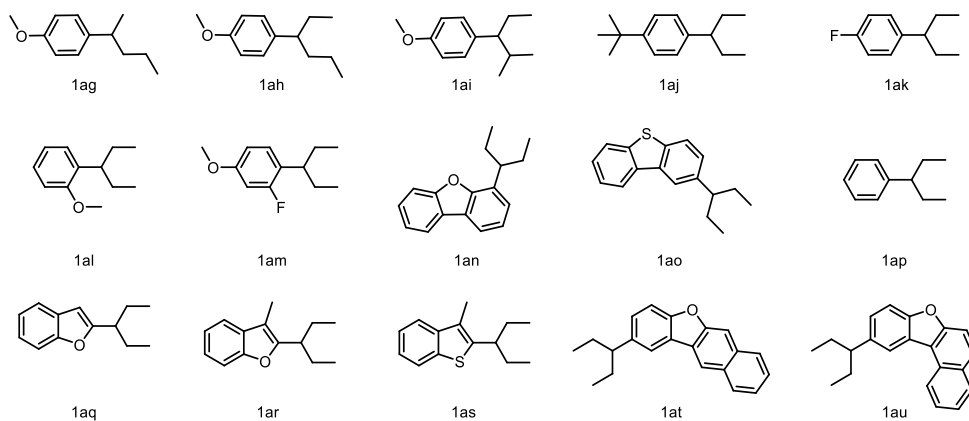

### 3.7: Characterization data of Substrates

### 1-methoxy-4-(pentan-3-yl) benzene (1a)

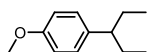

**1a**

Compound **1a** was isolated via column chromatography (PE) as colorless oil (1.44g, 75% yield).

**<sup>1</sup>H NMR** (400 MHz, Chloroform-*d*)  $\delta$  7.06 (d,  $J$  = 8.5 Hz, 2H), 6.85 (d,  $J$  = 8.6 Hz, 2H), 3.80 (s, 3H), 2.27 (m, 1H), 1.67 (m, 2H), 1.51 (m, 2H), 0.77 (t,  $J$  = 7.4 Hz, 6H).

**<sup>13</sup>C NMR** (101 MHz, Chloroform-*d*)  $\delta$  157.8, 138.0, 128.7, 113.6, 55.3, 49.0, 29.5, 12.3.

**HRMS** (ESI)  $m/z$ :  $[M+H]^+$  Calcd for C<sub>12</sub>H<sub>19</sub>O: 179.1431; Found: 179.1432.

Spectra are consistent with reported literature values.<sup>10</sup>

### 1-ethoxy-4-(pentan-3-yl) benzene (1b)

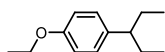

**1b**

Compound **1b** was isolated via column chromatography (PE) as colorless oil (1.34g, 70% yield).

**<sup>1</sup>H NMR** (400 MHz, Chloroform-*d*)  $\delta$  7.04 (d,  $J$  = 8.6 Hz, 2H), 6.84 (d,  $J$  = 8.6 Hz, 2H), 4.02 (q,  $J$  = 7.0 Hz, 2H), 2.26 (m, 1H), 1.67 (m, 2H), 1.59 – 1.45 (m, 2H), 1.41 (t,  $J$  = 7.0 Hz, 3H), 0.77 (t,  $J$  = 7.4 Hz, 6H).

**<sup>13</sup>C NMR** (101 MHz, Chloroform-*d*)  $\delta$  157.2, 137.9, 128.7, 114.2, 63.4, 49.0, 29.6, 15.1, 12.3.

**HRMS** (ESI)  $m/z$ :  $[M+H]^+$  Calcd for C<sub>13</sub>H<sub>21</sub>O: 193.1587; Found: 193.1584.

### 1-(pentan-3-yl)-4-propoxybenzene (1c)

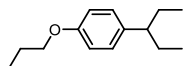

**1c**

Compound **1a** was isolated via column chromatography (PE) as colorless oil (1.15g, 60% yield).

**<sup>1</sup>H NMR** (400 MHz, Chloroform-*d*)  $\delta$  7.03 (d,  $J$  = 8.6 Hz, 2H), 6.83 (d,  $J$  = 8.6 Hz, 2H), 3.90 (t,  $J$  = 6.6 Hz, 2H), 2.32 – 2.14 (m, 1H), 1.86 – 1.74 (m, 2H), 1.66 (m, 2H), 1.54 – 1.41 (m, 2H), 1.03 (t,  $J$  = 7.4 Hz, 3H), 0.76 (t,  $J$  = 7.3 Hz, 6H).

$^{13}\text{C}$  NMR (101 MHz, Chloroform-*d*)  $\delta$  157.4, 137.8, 128.7, 114.2, 69.6, 49.0, 29.6, 22.8, 12.3, 10.7.

HRMS (ESI)  $m/z$ :  $[\text{M}+\text{H}]^+$  Calcd for  $\text{C}_{14}\text{H}_{23}\text{O}$ : 207.1744; Found: 207.1746.

**1-isopropoxy-4-(pentan-3-yl) benzene (1d)**

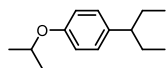

**1d**

Compound **1d** was isolated via column chromatography (PE) as colorless oil (1.1g, 57% yield).

$^1\text{H}$  NMR (400 MHz, Chloroform-*d*)  $\delta$  7.03 (d,  $J = 8.6$  Hz, 2H), 6.82 (d,  $J = 8.6$  Hz, 2H), 4.51 (m, 1H), 2.29 – 2.19 (m, 1H), 1.66 (m, 2H), 1.56 – 1.43 (m, 2H), 1.34 (d,  $J = 6.1$  Hz, 6H), 0.77 (t,  $J = 7.4$  Hz, 6H).

$^{13}\text{C}$  NMR (101 MHz, Chloroform-*d*)  $\delta$  156.1, 137.9, 128.7, 115.7, 69.9, 49.0, 29.5, 22.3, 12.3.

HRMS (ESI)  $m/z$ :  $[\text{M}+\text{H}]^+$  Calcd for  $\text{C}_{14}\text{H}_{23}\text{O}$ : 207.1744; Found: 207.1747.

**1-butoxy-4-(pentan-3-yl) benzene (1e)**

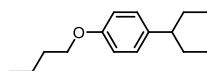

**1e**

Compound **1e** was isolated via column chromatography (PE) as colorless oil (1.08g, 56% yield).

$^1\text{H}$  NMR (400 MHz, Chloroform-*d*)  $\delta$  7.04 (d,  $J = 8.6$  Hz, 2H), 6.83 (d,  $J = 8.6$  Hz, 2H), 3.95 (t,  $J = 6.5$  Hz, 2H), 2.26 (m, 1H), 1.77 (m, 2H), 1.66 (m, 2H), 1.55 – 1.43 (m, 4H), 0.98 (t,  $J = 7.4$  Hz, 3H), 0.77 (t,  $J = 7.4$  Hz, 6H).

$^{13}\text{C}$  NMR (101 MHz, Chloroform-*d*)  $\delta$  157.4, 137.8, 128.7, 114.2, 67.7, 49.0, 31.6, 29.6, 19.5, 14.0, 12.3.

HRMS (ESI)  $m/z$ :  $[\text{M}+\text{H}]^+$  Calcd for  $\text{C}_{15}\text{H}_{25}\text{O}$ : 221.1900; Found: 221.1904.

**1-isobutoxy-4-(pentan-3-yl) benzene (1f)**

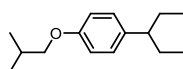

**1f**

Compound **1f** was isolated via column chromatography (PE) as colorless oil (0.96g, 50%

yield).

**<sup>1</sup>H NMR** (400 MHz, Chloroform-*d*)  $\delta$  7.03 (d,  $J = 8.6$  Hz, 2H), 6.83 (d,  $J = 8.6$  Hz, 2H), 3.70 (d,  $J = 6.5$  Hz, 2H), 2.25 (m, 1H), 2.07 (m, 1H), 1.65 (m, 2H), 1.56 – 1.44 (m, 2H), 1.03 (d,  $J = 6.7$  Hz, 6H), 0.77 (t,  $J = 7.4$  Hz, 6H).

**<sup>13</sup>C NMR** (101 MHz, Chloroform-*d*)  $\delta$  157.51, 137.8, 128.7, 114.3, 74.5, 49.0, 29.6, 28.5, 19.5, 12.4.

**HRMS** (ESI)  $m/z$ :  $[M+H]^+$  Calcd for C<sub>15</sub>H<sub>25</sub>O: 221.1900; Found: 221.1905.

### 1-(cyclopropylmethoxy)-4-(pentan-3-yl) benzene (**1g**)

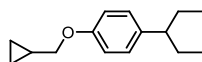

**1g**

Compound **1g** was isolated via column chromatography (PE) as colorless oil (0.87g, 45% yield).

**<sup>1</sup>H NMR** (400 MHz, Chloroform-*d*)  $\delta$  7.03 (d,  $J = 8.6$  Hz, 2H), 6.83 (d,  $J = 8.6$  Hz, 2H), 3.78 (d,  $J = 6.9$  Hz, 2H), 2.25 (m, 1H), 1.72 – 1.59 (m, 2H), 1.49 (m, 2H), 1.33 – 1.20 (m, 1H), 0.76 (t,  $J = 7.4$  Hz, 6H), 0.67 – 0.58 (m, 2H), 0.39 – 0.30 (m, 2H).

**<sup>13</sup>C NMR** (101 MHz, Chloroform-*d*)  $\delta$  157.2, 137.9, 128.7, 114.3, 72.8, 49.0, 29.6, 12.3, 10.5, 3.3.

**HRMS** (ESI)  $m/z$ :  $[M+H]^+$  Calcd for C<sub>15</sub>H<sub>23</sub>O: 219.1744; Found: 219.1743.

### 1-(sec-butoxy)-4-(pentan-3-yl) benzene (**1h**)

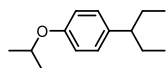

**1h**

Compound **1h** was isolated via column chromatography (PE) as colorless oil (0.90g, 47% yield).

**<sup>1</sup>H NMR** (400 MHz, Chloroform-*d*)  $\delta$  7.09 – 6.95 (m, 2H), 6.87 – 6.75 (m, 2H), 4.26 (m, 1H), 2.25 (m, 1H), 1.81 – 1.58 (m, 4H), 1.55 – 1.42 (m, 2H), 1.29 (d,  $J = 6.1$  Hz, 3H), 0.98 (t,  $J = 7.5$  Hz, 3H), 0.77 (t,  $J = 7.4$  Hz, 6H).

**<sup>13</sup>C NMR** (101 MHz, Chloroform-*d*)  $\delta$  156.42, 137.8, 128.7, 115.8, 75.2, 49.0, 29.5, 29.4, 19.5, 12.4, 10.0.

**HRMS** (ESI)  $m/z$ :  $[M+H]^+$  Calcd for C<sub>15</sub>H<sub>25</sub>O: 221.1900; Found: 221.1900.

### 1-(cyclopentyloxy)-4-(pentan-3-yl) benzene (**1i**)

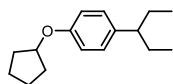

**1i**

Compound **1i** was isolated via column chromatography (PE) as colorless oil (0.87g, 45% yield).

**<sup>1</sup>H NMR** (400 MHz, Chloroform-*d*)  $\delta$  7.01 (d,  $J = 8.6$  Hz, 2H), 6.80 (d,  $J = 8.7$  Hz, 2H), 4.76 – 4.68 (m, 1H), 2.24 (m, 1H), 1.94 – 1.84 (m, 4H), 1.83 – 1.72 (m, 2H), 1.71 – 1.57 (m, 4H), 1.50 (m, 2H), 0.77 (t,  $J = 7.4$  Hz, 6H).

**<sup>13</sup>C NMR** (101 MHz, Chloroform-*d*)  $\delta$  156.3, 137.5, 128.6, 115.3, 79.2, 48.9, 33.1, 29.5, 24.2, 12.4.

**HRMS** (ESI)  $m/z$ :  $[M+H]^+$  Calcd for C<sub>16</sub>H<sub>25</sub>O: 233.1900; Found: 233.1903.

### 1-(cyclobutylmethoxy)-4-(pentan-3-yl) benzene (**1j**)

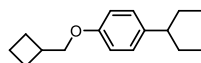

**1j**

Compound **1j** was isolated via column chromatography (PE: EA=50:1) as colorless oil (0.95g, 49% yield).

**<sup>1</sup>H NMR** (400 MHz, Chloroform-*d*)  $\delta$  7.04 (d,  $J = 8.6$  Hz, 2H), 6.85 (d,  $J = 8.7$  Hz, 2H), 3.92 (d,  $J = 6.7$  Hz, 2H), 2.86 – 2.68 (m, 1H), 2.26 (m, 1H), 2.20 – 2.09 (m, 2H), 2.04 – 1.81 (m, 4H), 1.77 – 1.59 (m, 2H), 1.59 – 1.40 (m, 2H), 0.78 (t,  $J = 7.4$  Hz, 6H).

**<sup>13</sup>C NMR** (101 MHz, Chloroform-*d*)  $\delta$  157.5, 137.8, 128.7, 114.3, 72.2, 49.0, 34.9, 29.6, 25.1, 18.8, 12.3.

**HRMS** (ESI)  $m/z$ :  $[M+H]^+$  Calcd for C<sub>16</sub>H<sub>25</sub>O: 233.1900; Found: 233.1895.

### 1-(cyclohexylmethoxy)-4-(pentan-3-yl) benzene (**1k**)

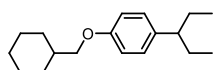

**1k**

Compound **1k** was isolated via column chromatography (PE: EA=50:1) as colorless oil (0.95g, 49% yield).

**<sup>1</sup>H NMR** (400 MHz, Chloroform-*d*)  $\delta$  7.03 (d,  $J = 8.6$  Hz, 2H), 6.82 (d,  $J = 8.6$  Hz, 2H), 3.74 (d,  $J = 6.3$  Hz, 2H), 2.25 (m, 1H), 1.93 – 1.83 (m, 2H), 1.83 – 1.59 (m, 6H), 1.57



– 1.44 (m, 2H), 1.37 – 1.17 (m, 3H), 1.06 (m, 2H), 0.77 (t,  $J = 7.4$  Hz, 6H).

$^{13}\text{C}$  NMR (101 MHz, Chloroform-*d*)  $\delta$  157.6, 137.7, 128.7, 114.2, 73.6, 49.0, 38.0, 30.1, 29.6, 26.7, 26.0, 12.3.

HRMS (ESI)  $m/z$ :  $[\text{M}+\text{Na}]^+$  Calcd for  $\text{C}_{18}\text{H}_{28}\text{NaO}$ : 283.2032; Found: 283.2030.

### 1-(cyclopentylmethoxy)-4-(pentan-3-yl) benzene (**1l**)

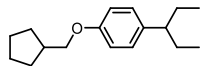

**1l**

Compound **1l** was isolated via column chromatography (PE) as colorless oil (0.95g, 49% yield).

$^1\text{H}$  NMR (400 MHz, Chloroform-*d*)  $\delta$  7.04 (d,  $J = 8.5$  Hz, 2H), 6.84 (d,  $J = 8.5$  Hz, 2H), 3.82 (d,  $J = 6.9$  Hz, 2H), 2.36 (m, 1H), 2.26 (m, 1H), 1.94 – 1.77 (m, 2H), 1.73 – 1.57 (m, 6H), 1.51 (m, 2H), 1.44 – 1.30 (m, 2H), 0.77 (t,  $J = 7.3$  Hz, 6H).

$^{13}\text{C}$  NMR (101 MHz, Chloroform-*d*)  $\delta$  157.5, 137.7, 128.7, 114.3, 72.3, 49.0, 39.3, 29.7, 29.6, 25.6, 12.3.

HRMS (ESI)  $m/z$ :  $[\text{M}+\text{H}]^+$  Calcd for  $\text{C}_{17}\text{H}_{27}\text{O}$ : 247.2057; Found: 247.2055.

### 1-(2-methoxyethoxy)-4-(pentan-3-yl) benzene (**1m**)

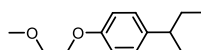

**1m**

Compound **1m** was isolated via column chromatography (PE: EA=20:1) as yellow oil (1.16g, 60% yield).

$^1\text{H}$  NMR (400 MHz, Chloroform-*d*)  $\delta$  7.07 – 6.96 (m, 2H), 6.92 – 6.79 (m, 2H), 4.11 (m, 2H), 3.80 – 3.70 (m, 2H), 3.45 (s, 3H), 2.25 (m, 1H), 1.76 – 1.58 (m, 2H), 1.58 – 1.43 (m, 2H), 0.85 – 0.69 (m, 6H).

$^{13}\text{C}$  NMR (101 MHz, Chloroform-*d*)  $\delta$  157.0, 138.2, 128.7, 114.3, 71.3, 67.3, 59.3, 49.0, 29.5, 12.3.

HRMS (ESI)  $m/z$ :  $[\text{M}+\text{Na}]^+$  Calcd for  $\text{C}_{14}\text{H}_{22}\text{NaO}_2$ : 245.1512; Found: 245.1512.

### 1-(pentan-3-yl)-4-phenoxybenzene (**1n**)

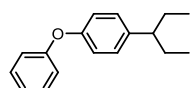

## 1n

Compound **1n** was isolated via column chromatography (PE: EA=20:1) as yellow oil (1.02g, 53% yield).

**<sup>1</sup>H NMR** (400 MHz, Chloroform-*d*)  $\delta$  7.33 (d,  $J = 8.6, 7.4$  Hz, 2H), 7.14 – 7.05 (m, 3H), 7.04 – 6.92 (m, 4H), 2.38 – 2.26 (m, 1H), 1.78 – 1.63 (m, 2H), 1.62 – 1.47 (m, 2H), 0.81 (t,  $J = 7.4$  Hz, 6H).

**<sup>13</sup>C NMR** (101 MHz, Chloroform-*d*)  $\delta$  157.9, 155.1, 141.0, 129.8, 129.0, 122.9, 119.0, 118.6, 49.2, 29.5, 12.3.

**HRMS** (ESI)  $m/z$ :  $[M+H]^+$  Calcd for C<sub>17</sub>H<sub>21</sub>O: 241.1587; Found: 241.1590.

## 2-fluoro-1-methoxy-4-(pentan-3-yl) benzene (1o)

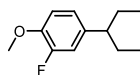

## 1o

Compound **1o** was isolated via column chromatography (PE: EA=100:1) as colorless oil (1.06g, 55% yield).

**<sup>1</sup>H NMR** (400 MHz, Chloroform-*d*)  $\delta$  6.92 – 6.77 (m, 3H), 3.87 (s, 3H), 2.24 (m, 1H), 1.64 (m, 2H), 1.54 – 1.38 (m, 2H), 0.76 (t,  $J = 7.4$  Hz, 6H).

**<sup>13</sup>C NMR** (101 MHz, Chloroform-*d*)  $\delta$  153.8, 151.3, 145.7, 145.6, 139.3, 139.2, 123.6, 123.5, 115.2, 115.0, 113.3, 113.3, 56.5, 49.0, 29.5, 12.2.

**<sup>19</sup>F NMR** (376 MHz, Chloroform-*d*)  $\delta$  -136.0.

**HRMS** (ESI)  $m/z$ :  $[M+H]^+$  Calcd for C<sub>12</sub>H<sub>18</sub>FO: 197.1336; Found: 197.1332.

## 2-chloro-1-methoxy-4-(pentan-3-yl) benzene (1p)

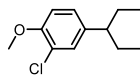

## 1p

Compound **1p** was isolated via column chromatography (PE: EA=100:1) as colorless oil (1.00g, 52% yield).

**<sup>1</sup>H NMR** (400 MHz, Chloroform-*d*)  $\delta$  7.14 (d,  $J = 2.2$  Hz, 1H), 6.98 (d,  $J = 8.3, 2.2$  Hz, 1H), 6.85 (d,  $J = 8.3$  Hz, 1H), 3.88 (s, 3H), 2.24 (m, 1H), 1.65 (m, 2H), 1.55 – 1.38 (m, 2H), 0.76 (t,  $J = 7.4$  Hz, 6H).

$^{13}\text{C}$  NMR (101 MHz, Chloroform-*d*)  $\delta$  153.1, 139.2, 129.4, 127.1, 122.1, 112.0, 56.3, 48.89, 29.4, 12.3.

HRMS (ESI)  $m/z$ :  $[\text{M}+\text{H}]^+$  Calcd for  $\text{C}_{12}\text{H}_{18}\text{ClO}$ : 213.1041; Found: 213.1040.

**2-bromo-1-methoxy-4-(pentan-3-yl) benzene (1q)**

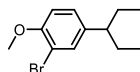

**1q**

Compound **1q** was isolated via column chromatography (PE) as yellow oil (0.56g, 50% yield).

$^1\text{H}$  NMR (400 MHz, Chloroform-*d*)  $\delta$  7.31 (d,  $J = 2.1$  Hz, 1H), 7.02 (d,  $J = 8.4, 2.2$  Hz, 1H), 6.83 (d,  $J = 8.3$  Hz, 1H), 3.87 (s, 3H), 2.23 (m, 1H), 1.72 – 1.58 (m, 2H), 1.55 – 1.41 (m, 2H), 0.76 (t,  $J = 7.4$  Hz, 6H).

$^{13}\text{C}$  NMR (101 MHz, Chloroform-*d*)  $\delta$  154.0, 139.7, 132.4, 127.9, 111.9, 111.5, 56.4, 48.83, 29.5, 12.3.

HRMS (ESI)  $m/z$ :  $[\text{M}+\text{H}]^+$  Calcd for  $\text{C}_{12}\text{H}_{18}\text{BrO}$ : 257.0536; Found: 257.0532.

**2-iodo-1-methoxy-4-(pentan-3-yl) benzene (1r)**

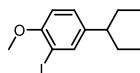

**1r**

Compound **1r** was isolated via column chromatography (PE) as colorless oil (0.40g, 44% yield).

$^1\text{H}$  NMR (400 MHz, Chloroform-*d*)  $\delta$  7.54 (d,  $J = 2.1$  Hz, 1H), 7.06 (d,  $J = 8.4, 2.1$  Hz, 1H), 6.75 (d,  $J = 8.4$  Hz, 1H), 3.86 (s, 3H), 2.21 (m, 1H), 1.64 (m, 2H), 1.53 – 1.36 (m, 2H), 0.76 (t,  $J = 7.4$  Hz, 6H).

$^{13}\text{C}$  NMR (101 MHz, Chloroform-*d*)  $\delta$  156.3, 140.3, 138.6, 128.9, 110.8, 86.0, 56.5, 48.7, 29.5, 12.3.

HRMS (ESI)  $m/z$ :  $[\text{M}+\text{H}]^+$  Calcd for  $\text{C}_{12}\text{H}_{18}\text{IO}$ : 305.0397; Found: 305.0396.

**6-(pentan-3-yl)-2,3-dihydrobenzo[*b*] [1,4] dioxine (1s)**

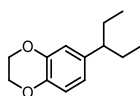

**1s**

Compound **1s** was isolated via column chromatography (PE: EA=10:1) as colorless oil (0.98g, 51% yield).

**<sup>1</sup>H NMR** (400 MHz, Chloroform-*d*)  $\delta$  6.78 (d,  $J$  = 8.2 Hz, 1H), 6.70 – 6.53 (m, 2H), 4.24 (m, 4H), 2.20 (m, 1H), 1.63 (m, 2H), 1.55 – 1.42 (m, 2H), 0.77 (t,  $J$  = 7.4 Hz, 6H).

**<sup>13</sup>C NMR** (101 MHz, Chloroform-*d*)  $\delta$  143.3, 141.6, 139.4, 120.9, 116.8, 116.3, 64.6, 64.45, 49.1, 29.5, 12.3.

**HRMS** (ESI)  $m/z$ :  $[M+H]^+$  Calcd for C<sub>13</sub>H<sub>19</sub>O<sub>2</sub>: 207.1380; Found: 207.1379.

#### 1,2-dimethoxy-4-(pentan-3-yl) benzene (**1t**)

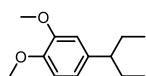

**1t**

Compound **1t** was isolated via column chromatography (PE) as yellow oil (1.02g, 53% yield).

**<sup>1</sup>H NMR** (400 MHz, Chloroform-*d*)  $\delta$  6.80 (d,  $J$  = 8.0 Hz, 1H), 6.71 – 6.59 (m, 2H), 3.87 (d,  $J$  = 5.6 Hz, 6H), 2.24 (m, 1H), 1.75 – 1.61 (m, 2H), 1.56 – 1.43 (m, 2H), 0.77 (t,  $J$  = 7.4 Hz, 6H).

**<sup>13</sup>C NMR** (101 MHz, Chloroform-*d*)  $\delta$  148.8, 147.2, 138.6, 119.9, 111.0, 110.9, 55.9, 55.9, 49.5, 29.5, 12.3.

**HRMS** (ESI)  $m/z$ :  $[M+H]^+$  Calcd for C<sub>13</sub>H<sub>21</sub>O<sub>2</sub>: 209.1536; Found: 209.1538.

#### 1,2,3-trimethoxy-5-(pentan-3-yl) benzene (**1u**)

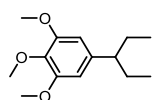

**1u**

Compound **1u** was isolated via column chromatography (PE: EA=10:1) as colorless oil (0.93g, 48% yield).

**<sup>1</sup>H NMR** (400 MHz, Chloroform-*d*)  $\delta$  6.34 (s, 2H), 3.84 (s, 6H), 3.83 (s, 3H), 2.22 (m, 1H), 1.76 – 1.58 (m, 3H), 1.58 – 1.40 (m, 2H), 0.79 (t,  $J$  = 7.4 Hz, 6H).

**<sup>13</sup>C NMR** (101 MHz, Chloroform-*d*)  $\delta$  153.1, 141.9, 136.1, 104.7, 61.0, 56.2, 50.3, 29.4, 12.4.

**HRMS** (ESI)  $m/z$ :  $[M+H]^+$  Calcd for C<sub>14</sub>H<sub>23</sub>O<sub>3</sub>: 239.1642; Found: 239.1638.

#### 4-(pentan-3-yl)-1,1'-biphenyl (**1v**)

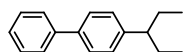

**1v**

Compound **1v** was isolated via column chromatography (PE: EA=10:1) as white solid (0.90g, 47% yield).

**Melting Point:** 61.1-61.6°C.

**<sup>1</sup>H NMR** (400 MHz, Chloroform-*d*)  $\delta$  7.62 – 7.57 (m, 2H), 7.55 – 7.49 (m, 2H), 7.45 – 7.39 (m, 2H), 7.35 – 7.28 (m, 1H), 7.24 – 7.17 (m, 2H), 2.36 (m, 1H), 1.71 (m, 2H), 1.65 – 1.56 (m, 2H), 0.81 (t,  $J = 7.4$  Hz, 6H).

**<sup>13</sup>C NMR** (101 MHz, Chloroform-*d*)  $\delta$  145.1, 141.3, 138.8, 128.8, 128.4, 127.1, 127.0, 127.0, 49.5, 29.4, 12.4.

**HRMS** (ESI)  $m/z$ :  $[M+H]^+$  Calcd for C<sub>17</sub>H<sub>21</sub>: 225.1638; Found: 225.1633.

#### 4-methoxy-4'-(pentan-3-yl)-1,1'-biphenyl (**1w**)

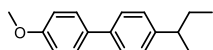

**1w**

Compound **1w** was isolated via column chromatography (PE: EA=10:1) as white solid (1.06g, 55% yield).

**Melting Point:** 89.2-90.3°C.

**<sup>1</sup>H NMR** (400 MHz, Chloroform-*d*)  $\delta$  7.54 (d,  $J = 8.8$  Hz, 2H), 7.48 (d,  $J = 8.2$  Hz, 2H), 7.18 (d,  $J = 8.2$  Hz, 2H), 6.97 (d,  $J = 8.8$  Hz, 2H), 3.85 (s, 3H), 2.42 – 2.27 (m, 1H), 1.77 – 1.66 (m, 2H), 1.65 – 1.55 (m, 2H), 0.81 (t,  $J = 7.4$  Hz, 6H).

**<sup>13</sup>C NMR** (101 MHz, Chloroform-*d*)  $\delta$  159.0, 144.5, 138.4, 134.0, 128.3, 128.1, 126.6, 114.3, 55.5, 49.5, 29.4, 12.4.

**HRMS** (ESI)  $m/z$ :  $[M+H]^+$  Calcd for C<sub>18</sub>H<sub>23</sub>O: 255.1744; Found: 255.1745.

#### 2-methoxy-4'-(pentan-3-yl)-1,1'-biphenyl (**1x**)

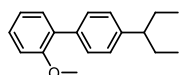

**1x**

Compound **1x** was isolated via column chromatography (PE: EA=10:1) as colorless oil (1.00g, 52% yield).

**<sup>1</sup>H NMR** (400 MHz, Chloroform-*d*)  $\delta$  7.47 (d,  $J$  = 8.2 Hz, 2H), 7.37 – 7.27 (m, 2H), 7.17 (d,  $J$  = 8.2 Hz, 2H), 7.06 – 6.94 (m, 2H), 3.82 (s, 3H), 2.43 – 2.28 (m, 1H), 1.72 (m, 2H), 1.66 – 1.55 (m, 2H), 0.83 (t,  $J$  = 7.4 Hz, 6H).

**<sup>13</sup>C NMR** (101 MHz, Chloroform-*d*)  $\delta$  156.6, 144.6, 136.0, 131.1, 130.8, 129.3, 128.4, 127.6, 120.9, 111.4, 55.7, 49.5, 29.3, 12.4.

**HRMS** (ESI)  $m/z$ :  $[M+H]^+$  Calcd for C<sub>18</sub>H<sub>23</sub>O: 255.1744; Found: 255.1745.

**4-(tert-butyl)-4'-(pentan-3-yl)-1,1'-biphenyl (1y)**

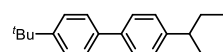

**1y**

Compound **1y** was isolated via column chromatography (PE: EA=10:1) as white solid (1.06g, 55% yield).

**Melting Point:** 52.6-53.1°C.

**<sup>1</sup>H NMR** (400 MHz, Chloroform-*d*)  $\delta$  7.58 – 7.48 (m, 4H), 7.45 (d,  $J$  = 8.4 Hz, 2H), 7.19 (d,  $J$  = 8.2 Hz, 2H), 2.35 (m, 1H), 1.71 (m, 2H), 1.65 – 1.55 (m, 2H), 1.36 (s, 9H), 0.81 (t,  $J$  = 7.4 Hz, 6H).

**<sup>13</sup>C NMR** (101 MHz, Chloroform-*d*)  $\delta$  150.0, 144.8, 138.6, 138.5, 128.3, 126.8, 126.7, 125.8, 49.5, 34.6, 31.5, 29.4, 12.4.

**HRMS** (ESI)  $m/z$ :  $[M+H]^+$  Calcd for C<sub>21</sub>H<sub>29</sub>: 281.2264; Found: 281.2260.

**4-(pentan-3-yl)-4'-(trifluoromethyl)-1,1'-biphenyl (1z)**

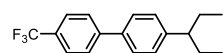

**1z**

Compound **1z** was isolated via column chromatography (PE: EA=10:1) as colorless oil (0.45g, 23% yield).

**<sup>1</sup>H NMR** (400 MHz, Chloroform-*d*)  $\delta$  7.75 – 7.62 (m, 4H), 7.57 – 7.51 (m, 2H), 7.27 – 7.23 (m, 2H), 2.40 (m, 1H), 1.74 (m, 2H), 1.67 – 1.58 (m, 2H), 0.83 (t,  $J$  = 7.4 Hz, 6H).

**<sup>13</sup>C NMR** (101 MHz, Chloroform-*d*)  $\delta$  146.3, 144.9, 137.3, 128.6, 127.3, 127.2, 125.8, 125.8, 49.6, 29.4, 12.4.

**<sup>19</sup>F NMR** (376 MHz, Chloroform-*d*)  $\delta$  -62.3.

**HRMS** (ESI)  $m/z$ :  $[M+H]^+$  Calcd for C<sub>18</sub>H<sub>20</sub>F<sub>3</sub>: 293.1512; Found: 293.1510.

### 4-fluoro-4'-(pentan-3-yl)-1,1'-biphenyl (**1aa**)

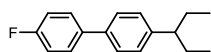

#### **1aa**

Compound **1aa** was isolated via column chromatography (PE: EA=10:1) as white solid (0.42g, 22% yield).

**Melting Point:** 90.8-91.5°C.

**<sup>1</sup>H NMR** (400 MHz, Chloroform-*d*)  $\delta$  7.55 (dd,  $J = 8.8, 5.4$  Hz, 2H), 7.47 (d,  $J = 8.2$  Hz, 2H), 7.20 (d,  $J = 8.2$  Hz, 2H), 7.11 (t,  $J = 8.7$  Hz, 2H), 2.37 (m, 1H), 1.81 – 1.66 (m, 2H), 1.65 – 1.55 (m, 2H), 0.81 (t,  $J = 7.4$  Hz, 6H).

**<sup>13</sup>C NMR** (101 MHz, Chloroform-*d*)  $\delta$  163.6, 161.2, 145.2, 137.8, 128.6, 128.4, 126.9, 115.8, 115.5, 49.5, 29.4, 12.4.

**<sup>19</sup>F NMR** (376 MHz, Chloroform-*d*)  $\delta$  -116.4.

**HRMS** (ESI)  $m/z$ :  $[M+H]^+$  Calcd for C<sub>17</sub>H<sub>20</sub>F: 243.1544; Found: 243.1547.

### 3-fluoro-4-methoxy-4'-(pentan-3-yl)-1,1'-biphenyl (**1ab**)

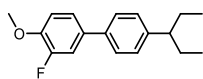

#### **1ab**

Compound **1ab** was isolated via column chromatography (PE: EA=10:1) as yellow oil (0.68g, 35% yield).

**<sup>1</sup>H NMR** (400 MHz, Chloroform-*d*)  $\delta$  7.46 (d,  $J = 8.2$  Hz, 2H), 7.38 – 7.28 (m, 2H), 7.22 – 7.15 (m, 2H), 7.02 (t,  $J = 8.3$  Hz, 1H), 3.93 (s, 3H), 2.44 – 2.24 (m, 1H), 1.72 (m, 2H), 1.64 – 1.57 (m, 1H), 1.56 – 1.51 (m, 1H), 0.81 (t,  $J = 7.4$  Hz, 6H).

**<sup>13</sup>C NMR** (101 MHz, Chloroform-*d*)  $\delta$  154.0, 151.5, 146.9, 146.8, 145.2, 137.3, 137.3, 134.7, 134.7, 128.4, 126.5, 122.5, 122.5, 114.8, 114.7, 113.8, 113.8, 56.5, 49.5, 29.4, 12.4.

**<sup>19</sup>F NMR** (376 MHz, Chloroform-*d*)  $\delta$  -135.3.

**HRMS** (ESI)  $m/z$ :  $[M+H]^+$  Calcd for C<sub>18</sub>H<sub>22</sub>FO: 273.1649; Found: 273.1646.

### 3-bromo-4-methoxy-4'-(pentan-3-yl)-1,1'-biphenyl (**1ac**)

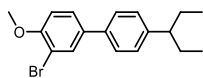

#### **1ac**

Compound **1ac** was isolated via column chromatography (PE: EA=10:1) as yellow oil (0.3g, 50% yield).

**<sup>1</sup>H NMR** (400 MHz, Chloroform-*d*)  $\delta$  7.80 (d,  $J = 2.2$  Hz, 1H), 7.50 (dd,  $J = 8.5, 2.3$  Hz, 1H), 7.47 – 7.42 (m, 2H), 7.22 – 7.15 (m, 2H), 6.96 (d,  $J = 8.5$  Hz, 1H), 3.93 (s, 3H), 2.36 (m, 1H), 1.79 – 1.65 (m, 2H), 1.64 – 1.52 (m, 3H), 0.81 (t,  $J = 7.4$  Hz, 6H).

**<sup>13</sup>C NMR** (101 MHz, Chloroform-*d*)  $\delta$  155.2, 145.1, 137.0, 135.4, 131.9, 128.4, 126.9, 126.6, 112.2, 112.1, 56.5, 49.5, 29.4, 12.4.

**HRMS** (ESI)  $m/z$ :  $[M+H]^+$  Calcd for C<sub>18</sub>H<sub>22</sub>BrO: 333.0849; Found: 333.0846.

#### 4-(pentan-3-yl)-1,1':4',1''-terphenyl (**1ad**)

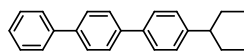

**1ad**

Compound **1ad** was isolated via column chromatography (PE) as white solid (0.82g, 42% yield).

**Melting Point:** 195.3-196.5°C.

**<sup>1</sup>H NMR** (400 MHz, Chloroform-*d*)  $\delta$  7.73 – 7.65 (m, 6H), 7.62 – 7.58 (m, 2H), 7.49 (m, 2H), 7.42 – 7.35 (m, 1H), 7.25 (d,  $J = 8.2$  Hz, 2H), 2.40 (m, 1H), 1.76 (m, 2H), 1.69 – 1.58 (m, 2H), 0.85 (t,  $J = 7.4$  Hz, 6H).

**<sup>13</sup>C NMR** (101 MHz, Chloroform-*d*)  $\delta$  145.3, 141.0, 140.3, 139.9, 138.2, 128.9, 128.4, 127.6, 127.4, 127.4, 127.2, 126.9, 49.5, 29.4, 12.4.

**HRMS** (ESI)  $m/z$ :  $[M+H]^+$  Calcd for C<sub>23</sub>H<sub>25</sub>: 301.1951; Found: 301.1950.

#### 2-(pentan-3-yl)dibenzo[b,d]furan (**1ae**)

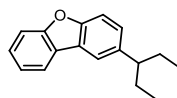

**1ae**

Compound **1ae** was isolated via column chromatography (PE) as colorless oil (1.50g, 52% yield).

**<sup>1</sup>H NMR** (400 MHz, Chloroform-*d*)  $\delta$  8.00 – 7.93 (m, 1H), 7.74 (d,  $J = 1.8$  Hz, 1H), 7.58 (m, 1H), 7.51 (d,  $J = 8.4$  Hz, 1H), 7.45 (m, 1H), 7.35 (m, 1H), 7.28 – 7.23 (m, 1H), 2.50 (m, 1H), 1.86 – 1.74 (m, 2H), 1.72 – 1.61 (m, 2H), 0.83 (t,  $J = 7.4$  Hz, 6H).



$^{13}\text{C}$  NMR (101 MHz, Chloroform-*d*)  $\delta$  156.6, 155.0, 140.5, 127.1, 127.0, 124.6, 124.2, 122.6, 120.7, 119.6, 111.8, 111.3, 49.9, 30.0, 12.4.

HRMS (ESI)  $m/z$ :  $[\text{M}+\text{H}]^+$  Calcd for  $\text{C}_{17}\text{H}_{19}\text{O}$ : 239.1431; Found: 239.1430.

### 2-bromo-8-(pentan-3-yl)dibenzo[b,d]furan (1af)

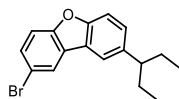

**1af**

Compound **1af** was isolated via column chromatography (PE) as colorless oil (0.93g, 48% yield).

**Melting Point:** 39.5-40.2°C.

$^1\text{H}$  NMR (400 MHz, Chloroform-*d*)  $\delta$  8.07 (d,  $J = 2.0$  Hz, 1H), 7.66 (d,  $J = 1.8$  Hz, 1H), 7.54 – 7.45 (m, 2H), 7.42 (d,  $J = 8.7$  Hz, 1H), 7.29 – 7.24 (m, 1H), 2.51 – 2.43 (m, 1H), 1.84 – 1.72 (m, 2H), 1.68 – 1.57 (m, 2H), 0.80 (t,  $J = 7.4$  Hz, 6H).

$^{13}\text{C}$  NMR (101 MHz, Chloroform-*d*)  $\delta$  155.4, 155.3, 140.9, 129.7, 127.9, 126.6, 123.6, 123.2, 119.7, 115.5, 113.3, 111.5, 49.9, 29.9, 12.4.

HRMS (ESI)  $m/z$ :  $[\text{M}+\text{H}]^+$  Calcd for  $\text{C}_{17}\text{H}_{18}\text{BrO}$ : 317.0536; Found: 317.0536.

### 1-(tert-butyl)-4-(pentan-3-yl) benzene (1aj)

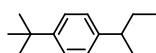

**1aj**

Compound **1aj** was isolated via column chromatography (PE) as colorless oil (1.03g, 67% yield).

$^1\text{H}$  NMR (400 MHz, Chloroform-*d*)  $\delta$  7.34 – 7.27 (m, 2H), 7.11 – 7.04 (m, 2H), 2.30 (m, 1H), 1.69 (m, 2H), 1.63 – 1.48 (m, 2H), 1.33 (s, 9H), 0.80 (t,  $J = 7.4$  Hz, 6H).

$^{13}\text{C}$  NMR (101 MHz, Chloroform-*d*)  $\delta$  148.5, 142.8, 127.5, 125.1, 49.2, 34.5, 31.6, 29.3, 12.4.

HRMS (ESI)  $m/z$ :  $[\text{M}+\text{H}]^+$  Calcd for  $\text{C}_{15}\text{H}_{25}$ : 205.1951; Found: 205.1950.

### 1-fluoro-4-(pentan-3-yl) benzene (1ak)

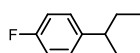

**1ak**

Compound **1ak** was isolated via column chromatography (PE) as colorless oil (1.50 g, 79% yield).

**<sup>1</sup>H NMR** (400 MHz, Chloroform-*d*)  $\delta$  7.08 (m, 2H), 7.04 – 6.92 (m, 2H), 2.31 (m, 1H), 1.74 – 1.63 (m, 2H), 1.57 – 1.44 (m, 2H), 0.76 (t,  $J = 7.4$  Hz, 6H).

**<sup>13</sup>C NMR** (101 MHz, Chloroform-*d*)  $\delta$  129.2, 129.1, 115.1, 114.9, 49.1, 29.6, 12.3.

**<sup>19</sup>F NMR** (376 MHz, Chloroform-*d*)  $\delta$  -118.0.

**1-methoxy-2-(pentan-3-yl) benzene (1al)**

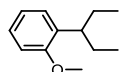

**1al**

Compound **1al** was isolated via column chromatography (PE) as colorless oil (1.4 g, 73% yield).

**<sup>1</sup>H NMR** (400 MHz, Chloroform-*d*)  $\delta$  7.20 – 7.09 (m, 2H), 6.97 – 6.83 (m, 2H), 3.81 (s, 3H), 2.94 (m, 1H), 1.73 – 1.51 (m, 4H), 0.78 (t,  $J = 7.4$  Hz, 6H).

**<sup>13</sup>C NMR** (101 MHz, Chloroform-*d*)  $\delta$  158.0, 134.2, 127.6, 126.5, 120.6, 110.7, 55.6, 41.0, 28.1, 12.2.

**HRMS** (ESI)  $m/z$ :  $[M+H]^+$  Calcd for C<sub>12</sub>H<sub>19</sub>O: 179.1431; Found: 179.1428.

**2-fluoro-4-methoxy-1-(pentan-3-yl) benzene (1am)**

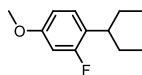

**1am**

Compound **1am** was isolated via column chromatography (PE) as colorless oil (0.98 g, 49% yield).

**<sup>1</sup>H NMR** (400 MHz, Chloroform-*d*)  $\delta$  7.05 (t,  $J = 8.5$  Hz, 1H), 6.66 (m, 1H), 6.58 (dd,  $J = 12.0, 2.6$  Hz, 1H), 3.78 (s, 3H), 2.68 (m, 1H), 1.76 – 1.62 (m, 2H), 1.61 – 1.47 (m, 2H), 0.79 (t,  $J = 7.4$  Hz, 6H).

**<sup>13</sup>C NMR** (101 MHz, Chloroform-*d*)  $\delta$  158.8, 129.0, 128.9, 124.2, 124.0, 109.9, 109.9, 101.5, 101.2, 55.6, 41.5, 28.4, 28.4, 12.2.

**HRMS** (ESI)  $m/z$ :  $[M+H]^+$  Calcd for C<sub>12</sub>H<sub>18</sub>FO: 197.1336; Found: 197.1332.

**4-(pentan-3-yl)dibenzo[b,d]furan (1an)**

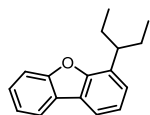

**1an**

Compound **1an** was isolated via column chromatography (PE) as colorless oil (1.11 g, 39% yield).

**<sup>1</sup>H NMR** (400 MHz, Chloroform-*d*)  $\delta$  7.94 (m, 1H), 7.78 (dd,  $J = 7.4, 1.6$  Hz, 1H), 7.57 (dd,  $J = 8.2, 0.8$  Hz, 1H), 7.43 (m, 1H), 7.35 – 7.21 (m, 3H), 3.05 (m, 1H), 1.93 – 1.74 (m, 4H), 0.82 (t,  $J = 7.4$  Hz, 6H).

**<sup>13</sup>C NMR** (101 MHz, Chloroform-*d*)  $\delta$  156.1, 155.2, 130.0, 126.9, 126.0, 124.8, 123.9, 122.9, 122.6, 120.7, 118.0, 111.8, 44.0, 28.2, 12.4.

**HRMS** (ESI)  $m/z$ :  $[M+H]^+$  Calcd for  $C_{12}H_{19}O$ : 239.1431; Found: 239.1434.

**2-(pentan-3-yl)dibenzo[b,d]thiophene (1ao)**

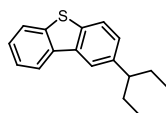

**1ao**

Compound **1ao** was isolated via column chromatography (PE) as colorless oil (1.04 g, 54% yield).

**<sup>1</sup>H NMR** (400 MHz, Chloroform-*d*)  $\delta$  8.19 – 8.11 (m, 1H), 7.91 (d,  $J = 1.7$  Hz, 1H), 7.87 – 7.80 (m, 1H), 7.76 (d,  $J = 8.3$  Hz, 1H), 7.47 – 7.37 (m, 2H), 7.28 – 7.21 (m, 1H), 2.49 (m, 1H), 1.78 (m, 2H), 1.72 – 1.57 (m, 2H), 0.81 (t,  $J = 7.4$  Hz, 6H).

**<sup>13</sup>C NMR** (101 MHz, Chloroform-*d*)  $\delta$  142.4, 139.9, 137.0, 135.8, 135.7, 127.0, 126.6, 124.3, 123.0, 122.6, 121.6, 120.9, 50.0, 29.8, 12.4.

**HRMS** (ESI)  $m/z$ :  $[M+H]^+$  Calcd for  $C_{17}H_{19}S$ : 255.1202; Found: 255.1206.

**pentan-3-ylbenzene (1ap)**

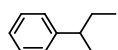

**1ap**

Compound **1ap** was isolated via column chromatography (PE) as colorless oil (0.73 g, 39% yield).

**<sup>1</sup>H NMR** (400 MHz, Chloroform-*d*)  $\delta$  7.31 – 7.23 (m, 2H), 7.21 – 7.09 (m, 3H), 2.30 (m, 1H), 1.69 (m, 2H), 1.61 – 1.48 (m, 2H), 0.77 (t, *J* = 7.4 Hz, 6H).

**<sup>13</sup>C NMR** (101 MHz, Chloroform-*d*)  $\delta$  146.0, 128.3, 128.0, 125.9, 49.9, 29.4, 12.3.

**HRMS** (ESI) *m/z*: [M+H]<sup>+</sup> Calcd for C<sub>11</sub>H<sub>17</sub>: 149.1325; Found: 149.1327.

### 2-(pentan-3-yl) benzofuran (1aq)

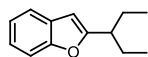

**1aq**

Compound **1aq** was isolated via column chromatography (PE) as colorless oil (1.27 g, 58% yield).

**<sup>1</sup>H NMR** (400 MHz, Chloroform-*d*)  $\delta$  7.61 – 7.45 (m, 2H), 7.33 – 7.19 (m, 2H), 6.49 – 6.40 (m, 1H), 2.71 (m, 1H), 1.87 – 1.75 (m, 4H), 0.96 (t, *J* = 7.4 Hz, 6H).

**<sup>13</sup>C NMR** (101 MHz, Chloroform-*d*)  $\delta$  162.3, 154.8, 129.0, 123.0, 122.4, 120.3, 110.9, 102.4, 43.0, 26.5, 11.9.

**HRMS** (ESI) *m/z*: [M+H]<sup>+</sup> Calcd for C<sub>13</sub>H<sub>17</sub>O: 189.1274; Found: 189.1275.

### 3-methyl-2-(pentan-3-yl) benzofuran (1ar)

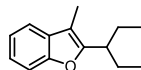

**1ar**

Compound **1ar** was isolated via column chromatography (PE) as colorless oil (1.30 g, 85% yield).

**<sup>1</sup>H NMR** (400 MHz, Chloroform-*d*)  $\delta$  7.46 – 7.34 (m, 2H), 7.23 – 7.15 (m, 2H), 2.65 (m, 1H), 2.16 (s, 3H), 1.82 – 1.62 (m, 4H), 0.81 (t, *J* = 7.4 Hz, 6H).

**<sup>13</sup>C NMR** (101 MHz, Chloroform-*d*)  $\delta$  156.2, 154.1, 130.6, 123.0, 121.9, 118.7, 111.0, 110.7, 41.3, 27.2, 12.4, 8.1.

**HRMS** (ESI) *m/z*: [M+H]<sup>+</sup> Calcd for C<sub>14</sub>H<sub>19</sub>O: 203.1431; Found: 203.1433.

### 3-methyl-2-(pentan-3-yl) benzo[b]thiophene (1as)

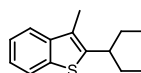

**1as**

Compound **1as** was isolated via column chromatography (PE) as colorless oil (2.24 g, 76% yield).

**<sup>1</sup>H NMR** (400 MHz, Chloroform-*d*)  $\delta$  7.80 (m, 1H), 7.65 (m, 1H), 7.37 (m, 1H), 7.31 – 7.25 (m, 1H), 2.95 (m, 1H), 2.35 (s, 3H), 1.86 – 1.75 (m, 2H), 1.69 – 1.58 (m, 2H), 0.88 (t,  $J = 7.4$  Hz, 6H).

**<sup>13</sup>C NMR** (101 MHz, Chloroform-*d*)  $\delta$  144.9, 141.1, 138.4, 127.5, 123.7, 123.5, 122.4, 121.3, 43.3, 30.8, 12.4, 12.1.

**HRMS** (ESI)  $m/z$ :  $[M+H]^+$  Calcd for C<sub>14</sub>H<sub>19</sub>S: 219.1202; Found: 219.1205.

**2-(pentan-3-yl) naphtho[2,3-*b*]benzofuran (1at)**

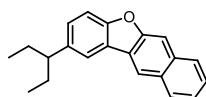

**1at**

Compound **1at** was isolated via column chromatography (PE) as white solid (0.72 g, 74% yield).

**Melting Point:** 79.6-80.3°C.

**<sup>1</sup>H NMR** (400 MHz, Chloroform-*d*)  $\delta$  8.41 (s, 1H), 8.03 (d,  $J = 8.0$  Hz, 1H), 7.97 (d,  $J = 7.7$  Hz, 1H), 7.91 (s, 1H), 7.84 (d,  $J = 1.9$  Hz, 1H), 7.55 – 7.45 (m, 3H), 7.30 (m, 1H), 2.52 (m, 1H), 1.88 – 1.75 (m, 2H), 1.74 – 1.60 (m, 2H), 0.87 – 0.80 (m, 6H).

**<sup>13</sup>C NMR** (101 MHz, Chloroform-*d*)  $\delta$  156.4, 155.4, 140.6, 133.1, 130.3, 128.5, 128.3, 127.9, 125.9, 125.8, 124.3, 123.9, 120.3, 119.1, 111.2, 107.0, 49.9, 29.9, 12.5.

**HRMS** (ESI)  $m/z$ :  $[M+H]^+$  Calcd for C<sub>21</sub>H<sub>21</sub>O: 289.1587; Found: 289.1591.

**10-(pentan-3-yl) naphtho[2,1-*b*]benzofuran (1au)**

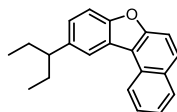

**1au**

Compound **1au** was isolated via column chromatography (PE) as white solid (0.61 g, 63% yield).

**Melting Point:** 59.1-61.2°C.

**<sup>1</sup>H NMR** (400 MHz, Chloroform-*d*)  $\delta$  8.65 (m, 1H), 8.15 (d,  $J = 1.7$  Hz, 1H), 8.06 – 8.00 (m, 1H), 7.91 (d,  $J = 8.9$  Hz, 1H), 7.79 – 7.71 (m, 2H), 7.63 (d,  $J = 8.5$  Hz, 1H), 7.55 (m, 1H), 7.33 – 7.27 (m, 1H), 2.59 (m, 1H), 1.85 (m, 2H), 1.78 – 1.65 (m, 2H), 0.86 (t,  $J = 7.4$  Hz, 6H).

$^{13}\text{C}$  NMR (101 MHz, Chloroform-*d*)  $\delta$  154.7, 154.7, 141.0, 130.6, 129.4, 129.3, 128.4, 127.2, 125.7, 125.0, 124.4, 123.7, 121.1, 117.6, 113.0, 111.5, 50.2, 30.1, 12.5.

HRMS (ESI)  $m/z$ :  $[\text{M}+\text{H}]^+$  Calcd for  $\text{C}_{21}\text{H}_{21}\text{O}$ : 289.1587; Found: 289.1589.

**(*E/Z*)-1-methoxy-4-(pent-2-en-3-yl) benzene (1D(*E*)/ 1D(*Z*))**

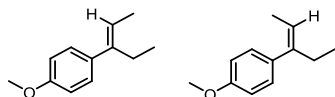

**1D(*E*)**

**1D(*Z*)**

Compounds **1D(*E*)** and **1D(*Z*)** are mixture, and the compounds was isolated via column chromatography (PE) as colorless oil (2g, 60% yield).

**1D(*E*)**  $^1\text{H}$  NMR (400 MHz, Chloroform-*d*)  $\delta$  7.27 (d,  $J = 8.8$  Hz, 2H), 6.84 (d,  $J = 8.8$  Hz, 2H), 5.65 (m, 1H), 3.80 (s, 3H), 2.56 – 2.38 (m, 2H), 1.78 (d,  $J = 6.9$  Hz, 3H), 0.98 (t,  $J = 7.5$  Hz, 3H).

$^{13}\text{C}$  NMR (101 MHz, Chloroform-*d*)  $\delta$  158.5, 141.8, 135.8, 127.3, 120.7, 113.7, 55.4, 22.8, 14.0, 13.4.

HRMS (ESI)  $m/z$ :  $[\text{M}+\text{H}]^+$  Calcd for  $\text{C}_{12}\text{H}_{17}\text{O}$ : 177.1274; Found: 177.1275.

Spectra are consistent with reported literature values.<sup>11</sup>

**1D(*Z*)**  $^1\text{H}$  NMR (400 MHz, Chloroform-*d*)  $\delta$  7.08 (d,  $J = 8.7$  Hz, 2H), 6.88 (d,  $J = 8.7$  Hz, 2H), 5.50 (m, 1H), 3.82 (s, 3H), 2.32 (m, 2H), 1.56 (d,  $J = 6.9$  Hz, 3H), 0.95 (t,  $J = 7.4$  Hz, 3H).

$^{13}\text{C}$  NMR (101 MHz, Chloroform-*d*)  $\delta$  158.2, 143.0, 133.7, 129.7, 119.6, 113.5, 55.3, 32.2, 14.8, 13.3.

HRMS (ESI)  $m/z$ :  $[\text{M}+\text{H}]^+$  Calcd for  $\text{C}_{12}\text{H}_{17}\text{O}$ : 177.1274; Found: 177.1275.

**1-methoxy-4-(pent-1-en-3-yl) benzene (1D-T)**

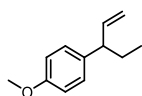

**1D-T**

Compound **1D-T** was isolated via column chromatography (PE) as colorless oil (1g, 30% yield).

**<sup>1</sup>H NMR** (400 MHz, Chloroform-*d*) δ 7.12 (d, *J* = 8.7 Hz, 2H), 6.86 (d, *J* = 8.7 Hz, 2H), 5.94 (m, 1H), 5.08 – 4.94 (m, 2H), 3.80 (s, 3H), 3.11 (q, *J* = 7.4 Hz, 1H), 1.80 – 1.63 (m, 2H), 0.88 (t, *J* = 7.4 Hz, 3H).

**<sup>13</sup>C NMR** (101 MHz, Chloroform-*d*) δ 158.1, 142.7, 136.7, 128.6, 113.9, 113.8, 55.4, 50.9, 28.5.

**HRMS** (ESI) *m/z*: [M+H]<sup>+</sup> Calcd for C<sub>12</sub>H<sub>17</sub>O: 177.1274; Found: 177.1270.

**1-(1-ethylcyclopropyl)-4-methoxybenzene (1D-C)**

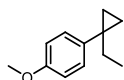

**1D-C**

Compound **1D-C** was isolated via column chromatography (PE) as colorless oil (0.78g, 56% yield).

**<sup>1</sup>H NMR** (400 MHz, Chloroform-*d*) δ 7.25 – 7.19 (dd, 2H), 6.86 – 6.80 (dd, 2H), 3.80 (s, 3H), 1.54 (q, *J* = 7.4 Hz, 2H), 0.84 (t, *J* = 7.3 Hz, 3H), 0.76 – 0.71 (m, 2H), 0.65 – 0.60 (m, 2H).

**<sup>13</sup>C NMR** (101 MHz, Chloroform-*d*) δ 157.8, 137.6, 130.3, 113.5, 55.4, 33.5, 26.3, 12.8, 11.5.

**HRMS** (ESI) *m/z*: [M+H]<sup>+</sup> Calcd for C<sub>12</sub>H<sub>17</sub>O: 177.1274; Found: 177.1276.

## 4. Synthesis and Characterizations of Products

### 4.1: General procedure for the synthesis of 1,4-diamines

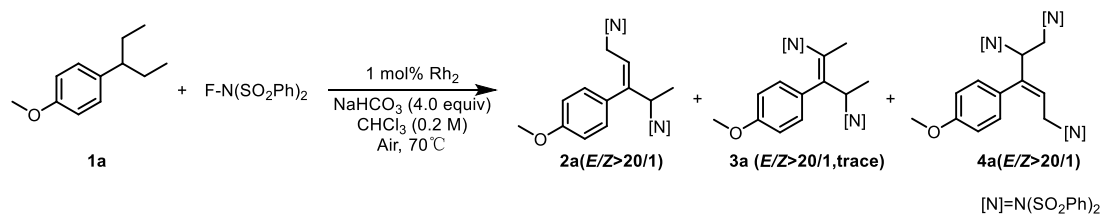

To a reaction tube charged with NFSI (630 mg, 2.0 mmol),  $\text{NaHCO}_3$  (135 mg, 1.6 mmol),  $\text{Rh}_2(\text{esp})_2$  (3 mg, 0.004 mmol) was added a solution of substrate **1a** (72 mg, 0.4 mmol) in  $\text{CHCl}_3$  (2 mL). The mixture was stirred for 1 h at  $70^\circ\text{C}$  in oil bath. After the reaction was completed, the solvent was evaporated and the organic product purified by column chromatography (petroleum ether/ $\text{EtOAc} = 3/1$ , v/v), giving the expected product **2a** (200 mg, 65%) as a white solid.

### 4.2: Gram-scale reaction

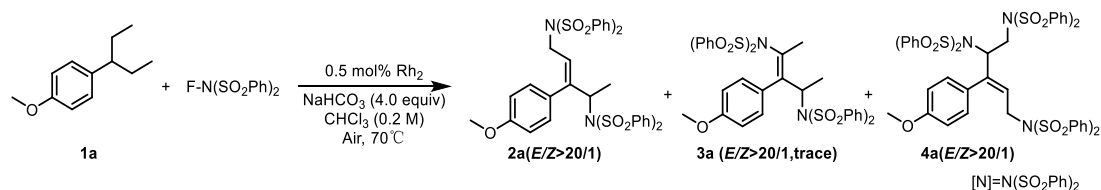

To a reaction tube charged with NFSI (6.3 g, 20 mmol),  $\text{NaHCO}_3$  (1.35 g, 16 mmol),  $\text{Rh}_2(\text{esp})_2$  (15 mg, 0.02 mmol) was added a solution of substrate **1a** (0.72 g, 4 mmol) in  $\text{CHCl}_3$  (20 mL). The mixture was stirred for 1 h at  $70^\circ\text{C}$  in oil bath. After the reaction was completed, the solvent was evaporated and the organic product purified by column chromatography (petroleum ether/ $\text{EtOAc} = 3/1$ , v/v), giving the expected product **2a** (1.72 g, 56%) as a white solid.

### 4.3: Mechanism Experiments

#### 4.3.1: Radical inhibitor Experiments

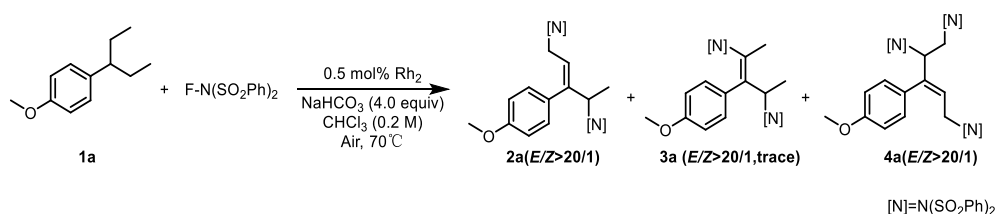



| Radical inhibitor (1 equiv) | Yield (%) of <b>2a</b> |
|-----------------------------|------------------------|
| Tempo                       | 52%                    |
| BHT                         | 30%                    |

To a reaction tube charged with NFSI (630 mg, 2.0 mmol), NaHCO<sub>3</sub> (135 mg, 1.6 mmol), Rh<sub>2</sub>(esp)<sub>2</sub> (3 mg, 0.004 mmol) was added a solution of substrate **1a** (72 mg, 0.4 mmol) in CHCl<sub>3</sub> (2 mL). Then TEMPO (63 mg, 0.4 mmol) or BHT (88 mg, 0.4 mmol) was added. The mixture was stirred for 1 h at 70°C in oil bath. After the reaction was completed, the solvent was evaporated and the organic product purified by column chromatography (petroleum ether/EtOAc= 3/1, v/v), giving the expected product **2a**. Compared with standard conditions, the yield of compound **2a** is significantly reduced.

#### 4.3.2: Possible olefin intermediate experiments

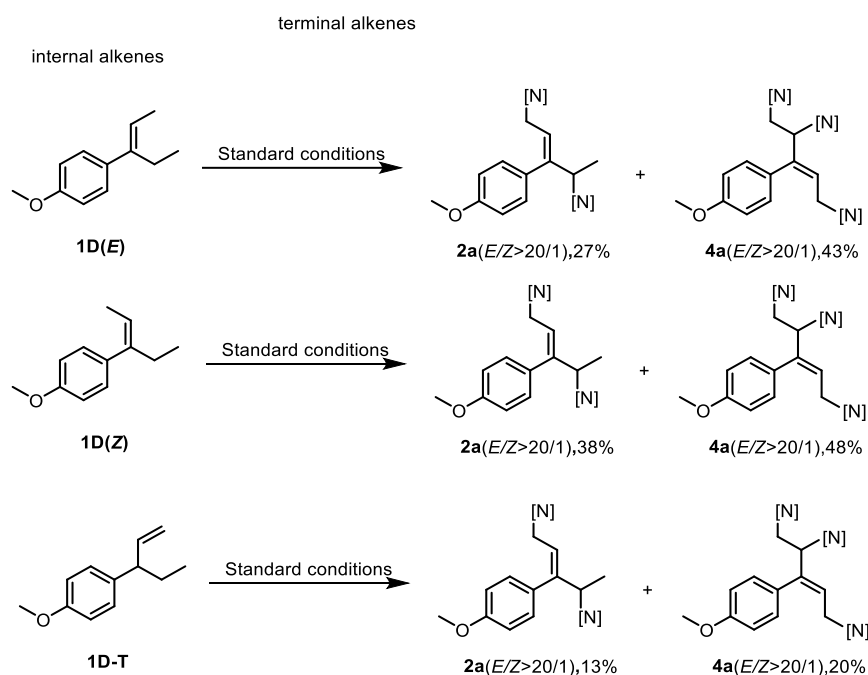

To a reaction tube charged with NFSI (315 mg, 1.0 mmol), NaHCO<sub>3</sub> (67 mg, 0.8 mmol), Rh<sub>2</sub>(esp)<sub>2</sub> (1.5 mg, 0.002 mmol) was added a solution of substrate **1D(E)** (35 mg, 0.2 mmol) or **1D(Z)** (35 mg, 0.2 mmol) or **1D-T** (35 mg, 0.2 mmol) in CHCl<sub>3</sub> (2 mL), respectively. The mixture was stirred for 1 h at 70°C in oil bath. After the reaction was completed, the reaction mixture was quenched with triethylamine, extracted with dichloromethane. The combined organic extracts were dried over Na<sub>2</sub>SO<sub>4</sub>, concentrated in vacuum. The obtained residue was added with pyrazine as an internal standard, and

the yield of the product was checked by quantitative nuclear magnetic resonance.

#### 4.3.3: cyclopropane intermediate experiments

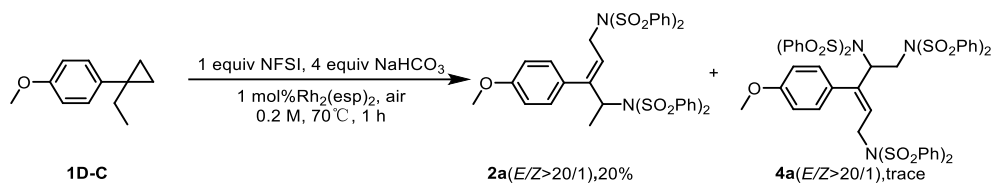

To a reaction tube charged with NFSI (126 mg, 0.4 mmol), NaHCO<sub>3</sub> (135 mg, 1.6 mmol), Rh<sub>2</sub>(esp)<sub>2</sub> (3 mg, 0.004 mmol) was added a solution of substrate **1D-C** (70 mg, 0.4 mmol) in CHCl<sub>3</sub> (2 mL). The mixture was stirred for 1 h at 70°C in oil bath. After the reaction was completed, the reaction mixture was quenched with triethylamine, extracted with dichloromethane. The combined organic extracts were dried over Na<sub>2</sub>SO<sub>4</sub>, concentrated in vacuum. The obtained residue was added with pyrazine as an internal standard, and the yield of the product was checked by quantitative nuclear magnetic resonance.

#### 4.3.4: Intermediate verification experiments

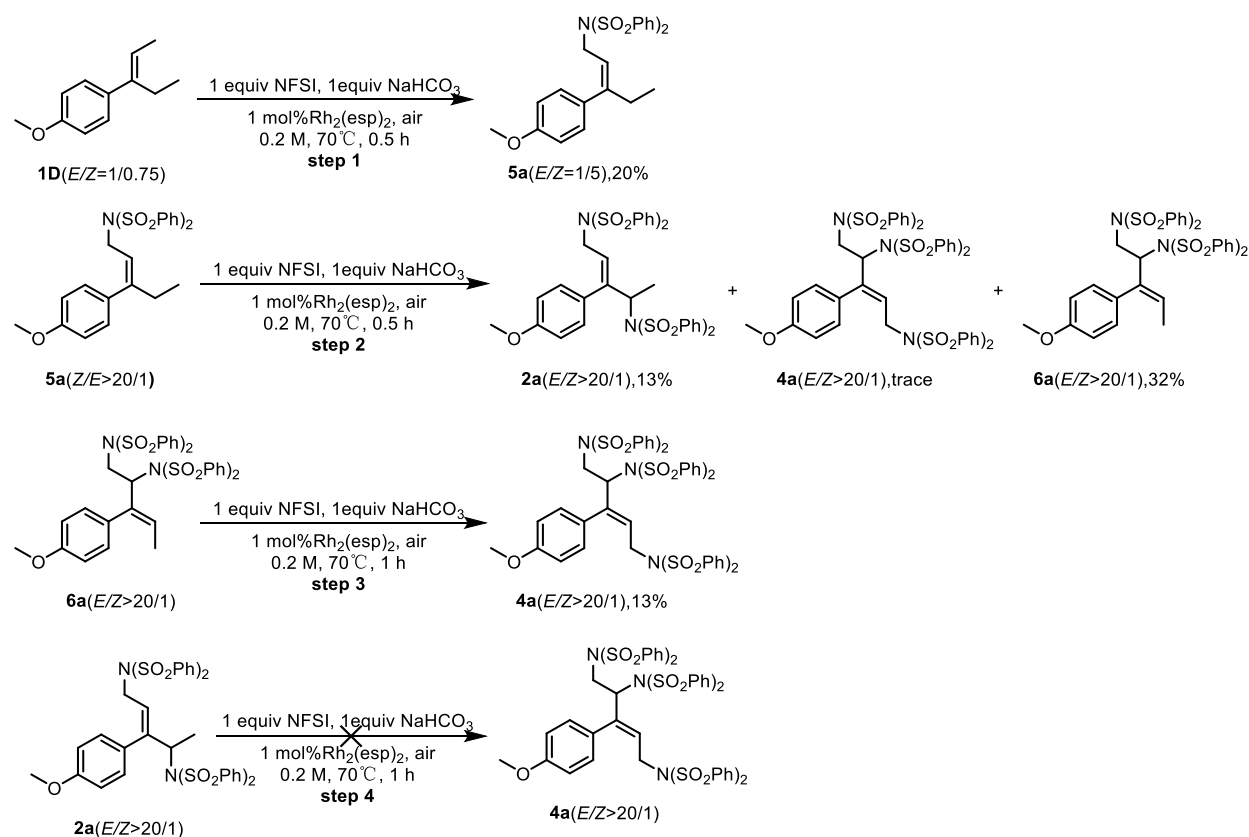

**Step 1:** To a reaction tube charged with NFSI (63 mg, 0.2 mmol), NaHCO<sub>3</sub> (17 mg,

0.2 mmol), Rh<sub>2</sub>(esp)<sub>2</sub> (1.5 mg, 0.002 mmol) was added a solution of substrate **1D** (35 mg, 0.2 mmol) in CHCl<sub>3</sub> (1 mL). The mixture was stirred for 0.5 h at 70°C in oil bath. After the reaction was completed, the solvent was evaporated and the organic product purified by column chromatography (petroleum ether/EtOAc= 3/1, v/v), giving the expected product **5a** (19 mg, 20%) as a white solid.

**Step 2:** To a reaction tube charged with NFSI (63 mg, 0.2 mmol), NaHCO<sub>3</sub> (17 mg, 0.2 mmol), Rh<sub>2</sub>(esp)<sub>2</sub> (1.5 mg, 0.002 mmol) was added a solution of substrate **5a**(*Z/E*>20/1) (94 mg, 0.2 mmol) in CHCl<sub>3</sub> (1 mL). The mixture was stirred for 0.5 h at 70°C in oil bath. After the reaction was completed, the reaction mixture was quenched with triethylamine, extracted with dichloromethane. The combined organic extracts were dried over Na<sub>2</sub>SO<sub>4</sub>, concentrated in vacuum. The obtained residue was added with pyrazine as an internal standard, and the yield of the product was checked by quantitative nuclear magnetic resonance.

**Step 3:** To a reaction tube charged with NFSI (63 mg, 0.2 mmol), NaHCO<sub>3</sub> (17 mg, 0.2 mmol), Rh<sub>2</sub>(esp)<sub>2</sub> (1.5 mg, 0.002 mmol) was added a solution of substrate **6a** (153 mg, 0.2 mmol) in CHCl<sub>3</sub> (1 mL). The mixture was stirred for 1 h at 70°C in oil bath. After the reaction was completed, the solvent was evaporated and the organic product purified by column chromatography (petroleum ether/EtOAc= 3/1, v/v), giving the expected product **4a** (34 mg, 13%) as a white solid.

**Step 4:** To a reaction tube charged with NFSI (63 mg, 0.2 mmol), NaHCO<sub>3</sub> (17 mg, 0.2 mmol), Rh<sub>2</sub>(esp)<sub>2</sub> (1.5 mg, 0.002 mmol) was added a solution of substrate **2a** (153 mg, 0.2 mmol) in CHCl<sub>3</sub> (1 mL). The mixture was stirred for 1 h at 70°C in oil bath. After the reaction was completed, the reaction mixture was quenched with triethylamine, extracted with dichloromethane. The combined organic extracts were dried over Na<sub>2</sub>SO<sub>4</sub>, concentrated in vacuum. The obtained residue was added with pyrazine as an internal standard, and the yield of the product was checked by quantitative nuclear magnetic resonance.

#### 4.3.5: Synthetic applications

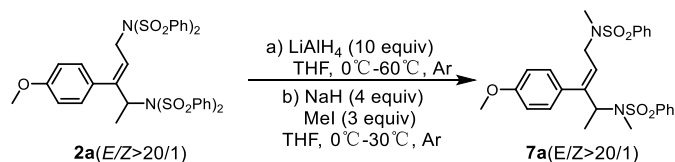

**Step a:** To a solution of **2a** (400 mg, 0.52 mmol) in dry THF (0.1 M) was added dropwise LAH (1 mol/L, 5.2 mL) at 0°C under Ar atmosphere. Then the reaction was stirred at 60°C for about 6 h and the progress of the reaction was monitored by TLC. Upon completion, the reaction was quenched with THF/H<sub>2</sub>O=10/1, and then 1 mol/L HCl was added until the system was a white emulsion. The product was extracted with EtOAc, and the combined organic layers removed under reduced pressure and the corresponding monoamination product was obtained after silica gel column chromatography (petroleum ether/ethyl acetate = 1/1).

**Step b:** The above product was dissolved in dry THF at 0 °C under Ar atmosphere, and NaH (4 eq) and MeI (3 eq) were added. The reaction was stirred at 30°C for about 1 h and the progress of the reaction was monitored by TLC. Upon completion, Water was added dropwise, followed by extraction with EtOAc (×3). The combined organics were dried Na<sub>2</sub>SO<sub>4</sub>, filtered, and concentrated under reduced pressure. The crude material was purified by silica gel chromatography (petroleum ether/ethyl acetate = 3/1) to yield the desired product.

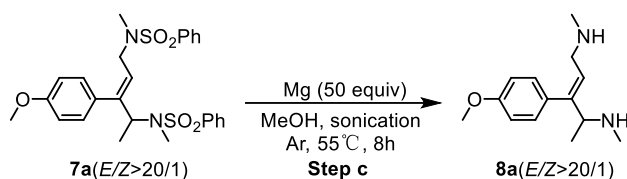

**Step c:** To a 50 mL tube charged with **7a** (100 mg), Mg powder (240 mg, 50 eq) was added. The tube was evacuated and backfilled with Ar atmosphere for three times. 5 mL MeOH was then added. After sonicated for 8 hours at 55°C, 1 M HCl was added to tune the mixture pH to 1. Then excess Na<sub>2</sub>CO<sub>3</sub> was added to the reaction mixture until no gas evolution. The organic solvent was removed under reduced pressure, and the white solid residue was dissolved in EA/MeOH (1:1), and the mixture was filtered through a pad of Celite. The organic solvent was removed under vacuum, and the residue was purified by silica gel chromatography (DCM /MeOH = 10/1) to yield the

desired product.

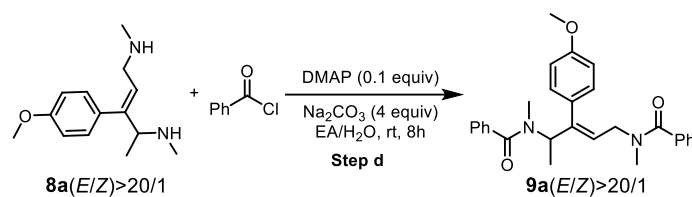

**Step d:** To a solution of **8a** (40 mg) in EtOAc (0.1 M) at room temperature was added DMAP (0.1 equiv), 15% sodium carbonate was then added under an air atmosphere. Finally, benzoyl chloride (3 equiv) was added. The reaction was stirred at room temperature for about 8h and the progress of the reaction was monitored by TLC. Upon completion, Water was added, followed by extraction with EtOAc ( $\times 3$ ). The combined organics were dried  $\text{Na}_2\text{SO}_4$ , filtered, and concentrated under reduced pressure. The crude material was purified by silica gel chromatography (ethyl acetate) to yield the desired product **9a**.

#### 4.4: Characterization data of products

##### *(E)*-*N,N'*-(3-(4-methoxyphenyl)pent-2-ene-1,4-diyl)bis(*N*-(phenylsulfonyl)benzenesulfonamide) (**2a**)

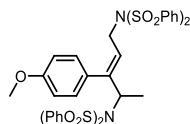

**2a**

Compound **2a** was isolated via column chromatography (PE: EA= 3: 1) as white solid (200 mg, 65% yield).

**Melting Point:** 135.1-136.0°C.

**$^1\text{H}$  NMR** (400 MHz, Chloroform-*d*)  $\delta$  8.00 – 7.75 (m, 8H), 7.64 – 7.56 (m, 4H), 7.47 (m, 8H), 6.91 (d,  $J = 8.4$  Hz, 2H), 6.74 (d,  $J = 8.4$  Hz, 2H), 5.73 (m, 1H), 5.23 – 5.09 (m, 1H), 4.29 (m, 1H), 4.07 (dd,  $J = 17.4, 7.2$  Hz, 1H), 3.81 (s, 3H), 1.36 (d,  $J = 7.0$  Hz, 3H).

**$^{13}\text{C}$  NMR** (101 MHz, Chloroform-*d*)  $\delta$  159.2, 141.8, 139.9, 133.9, 133.7, 130.3, 129.2, 129.0, 128.8, 128.6, 128.3, 125.6, 113.7, 62.0, 55.3, 48.3, 18.6.

**HRMS** (ESI)  $m/z$ :  $[\text{M}+\text{Na}]^+$  Calcd for  $\text{C}_{36}\text{H}_{34}\text{N}_2\text{NaO}_9\text{S}_4$ : 789.1039; Found: 789.1038.

##### *(E)*-*N,N',N''*-(3-(4-methoxyphenyl)pent-3-ene-1,2,5-triyl)tris(*N*-(phenylsulfonyl)

**benzenesulfonamide) (4a)**

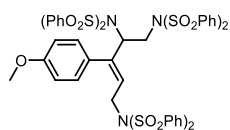

**4a**

Compound **4a** was isolated via column chromatography (PE: EA= 2: 1) as white solid (25 mg, 6% yield).

**Melting Point:** 134.7-135.6°C.

**<sup>1</sup>H NMR** (400 MHz, Chloroform-*d*)  $\delta$  8.18 – 8.03 (m, 6H), 7.95 – 7.88 (m, 4H), 7.72 – 7.62 (m, 5H), 7.57 (m, 6H), 7.51 – 7.39 (m, 7H), 7.28 – 7.21 (m, 2H), 6.74 – 6.62 (m, 2H), 6.31 (d,  $J$  = 8.2 Hz, 2H), 5.94 (m,  $J$  = 20.2, 7.5, 3.8 Hz, 2H), 4.60 (dd,  $J$  = 15.4, 7.1 Hz, 1H), 4.24 (m, 2H), 3.98 (dd,  $J$  = 17.7, 7.9 Hz, 1H), 3.78 (s, 3H).

**<sup>13</sup>C NMR** (101 MHz, Chloroform-*d*)  $\delta$  159.4, 140.8, 139.8, 139.6, 138.4, 137.5, 134.4, 134.0, 134.0, 133.6, 130.5, 130.5, 130.0, 129.6, 129.5, 129.3, 129.2, 128.7, 128.6, 128.3, 113.6, 65.2, 55.3, 50.3, 48.1.

HRMS (ESI)  $m/z$ :  $[M+Na]^+$  Calcd for  $C_{48}H_{43}N_3NaO_{13}S_6$ : 1084.1012; Found: 1084.1015.

**(E)-N,N'-(3-(4-ethoxyphenyl)pent-2-ene-1,4-diyl)bis(N-(phenylsulfonyl)**

**benzenesulfonamide) (2b)**

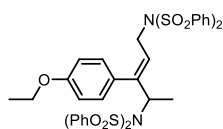

**2b**

Compound **2b** was isolated via column chromatography (PE: EA= 3: 1) as white solid (200 mg, 64% yield).

**Melting Point:** 126.7-127.4°C.

**<sup>1</sup>H NMR** (400 MHz, Chloroform-*d*)  $\delta$  8.04 – 7.69 (m, 8H), 7.66 – 7.54 (m, 4H), 7.54 – 7.36 (m, 8H), 6.90 (d,  $J$  = 8.7 Hz, 2H), 6.73 (d,  $J$  = 8.7 Hz, 2H), 5.73 (m, 1H), 5.17 (m, 1H), 4.29 (m, 1H), 4.13 – 3.96 (m, 3H), 1.45 (t,  $J$  = 7.0 Hz, 3H), 1.35 (d,  $J$  = 7.1 Hz, 3H).

**<sup>13</sup>C NMR** (101 MHz, Chloroform-*d*)  $\delta$  158.7, 141.8, 139.9, 133.9, 133.7, 130.3, 129.2, 129.0, 128.7, 128.6, 128.4, 125.6, 114.2, 63.5, 62.0, 48.3, 18.7, 15.1.

**HRMS** (ESI)  $m/z$ :  $[M+Na]^+$  Calcd for  $C_{37}H_{36}N_2NaO_9S_4$ : 803.1196; Found: 803.1200.

**(*E*)-*N,N',N''*-(3-(4-ethoxyphenyl)pent-3-ene-1,2,5-triyl)tris(*N*-(phenylsulfonyl)benzenesulfonamide) (4b)**

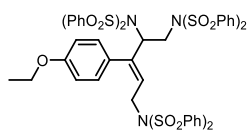

**4b**

Compound **4b** was isolated via column chromatography (PE: EA= 2: 1) as yellow solid (21 mg, 5% yield).

**Melting Point:** 128.9-129.5°C.

**$^1H$  NMR** (400 MHz, Chloroform-*d*)  $\delta$  8.22 – 8.03 (m, 6H), 7.95 – 7.88 (m, 4H), 7.72 – 7.62 (m, 5H), 7.58 (dd,  $J = 8.5, 7.3$  Hz, 6H), 7.49 – 7.40 (m, 7H), 7.28 – 7.19 (m, 2H), 6.66 (d,  $J = 9.0$  Hz, 2H), 6.25 (d,  $J = 8.2$  Hz, 2H), 5.93 (m, 2H), 4.61 (dd,  $J = 15.4, 7.1$  Hz, 1H), 4.23 (m, 2H), 4.04 – 3.91 (m, 3H), 1.41 (t,  $J = 7.0$  Hz, 3H).

**$^{13}C$  NMR** (101 MHz, Chloroform-*d*)  $\delta$  158.8, 140.8, 139.9, 139.6, 138.4, 137.5, 134.4, 134.0, 133.9, 133.6, 130.4, 130.4, 130.0, 129.5, 129.5, 129.2, 129.2, 128.7, 128.6, 128.3, 128.2, 114.1, 65.1, 63.4, 50.3, 48.1, 15.0.

**HRMS** (ESI)  $m/z$ :  $[M+Na]^+$  Calcd for  $C_{49}H_{45}N_3NaO_{13}S_6$ : 1098.1169; Found: 1098.1165.

**(*E*)-*N,N'*-(3-(4-propoxyphenyl)pent-2-ene-1,4-diyl)bis(*N*-(phenylsulfonyl)benzenesulfonamide) (2c)**

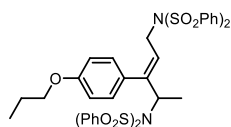

**2c**

Compound **2c** was isolated via column chromatography (PE: EA= 3: 1) as white solid (170 mg, 53% yield).

**Melting Point:** 133.1-133.8°C.

**$^1H$  NMR** (400 MHz, Chloroform-*d*)  $\delta$  8.03 – 7.70 (m, 8H), 7.65 – 7.54 (m, 4H), 7.54 – 7.37 (m, 8H), 6.89 (d,  $J = 8.7$  Hz, 2H), 6.73 (d,  $J = 8.7$  Hz, 2H), 5.72 (m, 1H), 5.18 (m, 1H), 4.29 (m, 1H), 4.08 (m, 1H), 3.91 (t,  $J = 6.5$  Hz, 2H), 1.85 (m, 2H), 1.36 (d,  $J = 7.1$  Hz, 3H), 1.08 (t,  $J = 7.4$  Hz, 3H).

$^{13}\text{C}$  NMR (101 MHz, Chloroform-*d*)  $\delta$  158.9, 141.9, 139.9, 133.9, 133.7, 130.3, 129.2, 129.0, 128.7, 128.5, 128.4, 125.6, 114.2, 69.5, 62.0, 48.3, 22.8, 18.7, 10.8.

HRMS (ESI)  $m/z$ :  $[\text{M}+\text{Na}]^+$  Calcd for  $\text{C}_{38}\text{H}_{38}\text{N}_2\text{NaO}_9\text{S}_4$ : 817.1352; Found: 817.1355.

**(*E*)-*N,N'*-(3-(4-isopropoxyphenyl)pent-2-ene-1,4-diyl)bis(*N*-(phenylsulfonyl)benzenesulfonamide) (2d)**

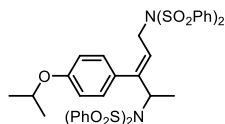

**2d**

Compound **2d** was isolated via column chromatography (PE: EA= 3: 1) as white solid (175 mg, 55% yield).

**Melting Point:** 155.4-156.3°C.

$^1\text{H}$  NMR (400 MHz, Chloroform-*d*)  $\delta$  8.00 – 7.75 (m, 8H), 7.59 (m, 4H), 7.47 (m, 8H), 6.90 (d,  $J$  = 8.6 Hz, 2H), 6.73 (d,  $J$  = 8.6 Hz, 2H), 5.73 (m, 1H), 5.24 – 5.12 (m, 1H), 4.54 (m, 1H), 4.29 (m, 1H), 4.09 (dd,  $J$  = 17.3, 7.2 Hz, 1H), 1.38 (d,  $J$  = 6.1 Hz, 6H), 1.34 (d,  $J$  = 7.0 Hz, 3H).

$^{13}\text{C}$  NMR (101 MHz, Chloroform-*d*)  $\delta$  157.7, 141.8, 139.9, 133.9, 133.7, 130.4, 129.2, 129.0, 128.7, 128.4, 128.4, 125.5, 115.3, 69.8, 61.9, 48.3, 22.3, 22.3, 18.7.

HRMS (ESI)  $m/z$ :  $[\text{M}+\text{Na}]^+$  Calcd for  $\text{C}_{38}\text{H}_{38}\text{N}_2\text{NaO}_9\text{S}_4$ : 817.1352; Found: 817.1355.

**(*E*)-*N,N'*-(3-(4-butoxyphenyl)pent-2-ene-1,4-diyl)bis(*N*-(phenylsulfonyl)benzenesulfonamide) (2e)**

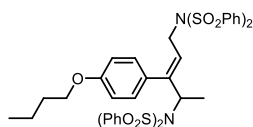

**2e**

Compound **2e** was isolated via column chromatography (PE: EA= 3: 1) as white solid (182 mg, 56% yield).

**Melting Point:** 145.4-146.1°C.

$^1\text{H}$  NMR (400 MHz, Chloroform-*d*)  $\delta$  7.99 – 7.75 (m, 8H), 7.64 – 7.55 (m, 4H), 7.47 (m, 8H), 6.89 (d,  $J$  = 8.6 Hz, 2H), 6.73 (d,  $J$  = 8.7 Hz, 2H), 5.72 (m, 1H), 5.24 – 5.10 (m, 1H), 4.29 (m, 1H), 4.13 – 4.02 (m, 1H), 3.95 (t,  $J$  = 6.5 Hz, 2H), 1.85 – 1.75 (m, 2H), 1.57 (d,  $J$  = 4.1 Hz, 1H), 1.53 (d,  $J$  = 2.0 Hz, 1H), 1.35 (d,  $J$  = 7.1 Hz, 3H), 1.01



(t,  $J = 7.4$  Hz, 3H).

$^{13}\text{C}$  NMR (101 MHz, Chloroform-*d*)  $\delta$  158.9, 141.9, 139.9, 133.9, 133.7, 130.3, 129.2, 129.0, 128.7, 128.5, 128.4, 125.6, 114.2, 67.7, 62.0, 48.3, 31.5, 19.5, 18.7, 14.0.

HRMS (ESI)  $m/z$ :  $[\text{M}+\text{Na}]^+$  Calcd for  $\text{C}_{39}\text{H}_{40}\text{N}_2\text{NaO}_9\text{S}_4$ : 831.1509; Found: 831.1510.

**(*E*)-*N,N'*-(3-(4-isobutoxyphenyl)pent-2-ene-1,4-diyl)bis(*N*-(phenylsulfonyl)benzenesulfonamide) (2f)**

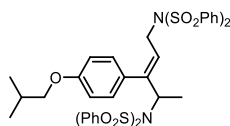

**2f**

Compound **2f** was isolated via column chromatography (PE: EA= 3: 1) as white solid (210 mg, 62% yield).

**Melting Point:** 161.1-162.0°C.

$^1\text{H}$  NMR (400 MHz, Chloroform-*d*)  $\delta$  8.04 – 7.72 (m, 8H), 7.65 – 7.54 (m, 4H), 7.54 – 7.35 (m, 8H), 6.89 (d,  $J = 8.6$  Hz, 2H), 6.73 (d,  $J = 8.7$  Hz, 2H), 5.72 (m, 1H), 5.17 (m, 1H), 4.29 (m, 1H), 4.07 (m, 1H), 3.71 (d,  $J = 6.5$  Hz, 2H), 2.12 (m, 1H), 1.36 (d,  $J = 7.0$  Hz, 3H), 1.07 (dd,  $J = 6.7, 0.9$  Hz, 6H).

$^{13}\text{C}$  NMR (101 MHz, Chloroform-*d*)  $\delta$  159.0, 141.9, 139.9, 133.9, 133.7, 130.2, 129.2, 129.0, 128.6, 128.5, 128.3, 125.5, 114.2, 74.4, 62.0, 48.3, 28.4, 19.5, 18.6.

HRMS (ESI)  $m/z$ :  $[\text{M}+\text{Na}]^+$  Calcd for  $\text{C}_{39}\text{H}_{40}\text{N}_2\text{NaO}_9\text{S}_4$ : 831.1509; Found: 831.1512.

**(*E*)-*N,N'*-(3-(4-(cyclopropylmethoxy)phenyl)pent-2-ene-1,4-diyl)bis(*N*-(phenylsulfonyl)benzenesulfonamide) (2g)**

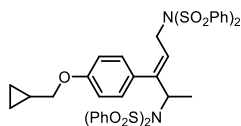

**2g**

Compound **2g** was isolated via column chromatography (PE: EA= 3: 1) as white solid (155 mg, 48% yield).

**Melting Point:** 144.6-145.3°C.

$^1\text{H}$  NMR (400 MHz, Chloroform-*d*)  $\delta$  7.90 (dd,  $J = 36.4, 8.2$  Hz, 8H), 7.60 (m, 4H), 7.48 (m, 8H), 6.89 (d,  $J = 8.3$  Hz, 2H), 6.74 (d,  $J = 8.4$  Hz, 2H), 5.73 (m, 1H), 5.18 (q,  $J = 7.1$  Hz, 1H), 4.38 – 4.21 (m, 1H), 4.08 (dd,  $J = 17.3, 7.2$  Hz, 1H), 3.80 (d,  $J = 6.9$

Hz, 2H), 3.48 (s, 1H), 1.35 (d,  $J = 7.1$  Hz, 3H), 0.72 – 0.65 (m, 2H), 0.38 (q,  $J = 5.3$  Hz, 2H).

$^{13}\text{C}$  NMR (101 MHz, Chloroform-*d*)  $\delta$  158.6, 141.7, 139.8, 133.8, 133.6, 130.2, 129.1, 128.9, 128.5, 128.2, 125.5, 114.2, 72.6, 61.9, 48.2, 18.5, 10.3, 3.3, 3.3.

HRMS (ESI)  $m/z$ :  $[\text{M}+\text{Na}]^+$  Calcd for  $\text{C}_{39}\text{H}_{38}\text{N}_2\text{NaO}_9\text{S}_4$ : 829.1352; Found: 829.1355.

**(*E*)-*N,N'*-(3-(4-(*sec*-butoxy)phenyl)pent-2-ene-1,4-diyl)bis(*N*-(phenylsulfonyl)benzenesulfonamide) (2h)**

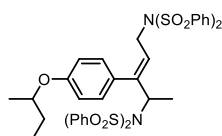

### 2h

Compound **2h** was isolated via column chromatography (PE: EA= 3: 1) as white solid (155 mg, 48% yield).

**Melting Point:** 150.6-151.4°C.

$^1\text{H}$  NMR (400 MHz, Chloroform-*d*)  $\delta$  8.07 – 7.71 (m, 8H), 7.71 – 7.36 (m, 13H), 6.91 (d,  $J = 8.3$  Hz, 2H), 6.79 – 6.64 (m, 2H), 5.73 (m, 1H), 5.27 – 5.12 (m, 1H), 4.30 (m, 2H), 4.10 (m, 1H), 1.79 (m, 1H), 1.73 – 1.55 (m, 2H), 1.35 (m, 6H), 1.04 (m, 3H).

$^{13}\text{C}$  NMR (101 MHz, Chloroform-*d*)  $\delta$  158.0, 139.9, 133.9, 133.7, 130.3, 129.2, 128.9, 128.6, 128.3, 125.5, 115.3, 115.3, 74.9, 61.9, 48.2, 29.4, 29.4, 19.5, 18.6, 10.1.

HRMS (ESI)  $m/z$ :  $[\text{M}+\text{Na}]^+$  Calcd for  $\text{C}_{39}\text{H}_{40}\text{N}_2\text{NaO}_9\text{S}_4$ : 831.1509; Found: 831.1512.

**(*E*)-*N,N'*-(3-(4-(cyclopentyloxy)phenyl)pent-2-ene-1,4-diyl)bis(*N*-(phenylsulfonyl)benzenesulfonamide) (2i)**

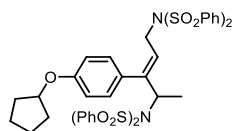

### 2i

Compound **2i** was isolated via column chromatography (PE: EA= 3: 1) as white solid (152 mg, 46% yield).

**Melting Point:** 146.2-147.3°C.

$^1\text{H}$  NMR (400 MHz, Chloroform-*d*)  $\delta$  8.06 – 7.71 (m, 8H), 7.71 – 7.32 (m, 13H), 6.97

– 6.79 (m, 2H), 6.79 – 6.66 (m, 2H), 5.74 (m, 1H), 5.30 – 5.12 (m, 1H), 4.74 (m, 1H), 4.31 (m, 1H), 4.19 – 4.02 (m, 1H), 1.97 – 1.77 (m, 6H), 1.66 (m, 2H), 1.36 (d,  $J = 7.0$  Hz, 3H).

$^{13}\text{C}$  NMR (101 MHz, Chloroform-*d*)  $\delta$  157.9, 141.8, 139.9, 133.9, 133.7, 130.2, 129.2, 128.9, 128.6, 128.3, 128.2, 125.4, 115.1, 79.2, 61.9, 48.3, 33.0, 33.0, 24.2, 18.6.

HRMS (ESI)  $m/z$ :  $[\text{M}+\text{Na}]^+$  Calcd for  $\text{C}_{40}\text{H}_{40}\text{N}_2\text{NaO}_9\text{S}_4$ : 843.1509; Found: 843.1513.

**(*E*)-*N,N'*-(3-(4-(cyclobutylmethoxy)phenyl)pent-2-ene-1,4-diyl)bis(*N*-(phenylsulfonyl)benzenesulfonamide) (2j)**

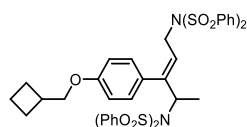

**2j**

Compound **2j** was isolated via column chromatography (PE: EA= 3: 1) as white solid (140 mg, 43% yield).

**Melting Point:** 152.7-153.1°C.

$^1\text{H}$  NMR (400 MHz, Chloroform-*d*)  $\delta$  8.02 – 7.74 (m, 8H), 7.64 – 7.54 (m, 4H), 7.54 – 7.39 (m, 8H), 6.89 (d,  $J = 8.7$  Hz, 2H), 6.73 (d,  $J = 8.7$  Hz, 2H), 5.73 (m, 1H), 5.17 (m, 1H), 4.29 (m, 1H), 4.08 (m, 1H), 3.92 (d,  $J = 6.6$  Hz, 2H), 2.80 (m, 1H), 2.24 – 2.13 (m, 2H), 2.05 – 1.86 (m, 4H), 1.36 (d,  $J = 7.1$  Hz, 3H).

$^{13}\text{C}$  NMR (101 MHz, Chloroform-*d*)  $\delta$  159.0, 141.9, 139.9, 133.9, 133.7, 130.2, 129.2, 129.0, 128.6, 128.4, 125.6, 114.3, 72.1, 62.0, 48.3, 34.8, 25.0, 25.0, 18.8, 18.7.

HRMS (ESI)  $m/z$ :  $[\text{M}+\text{Na}]^+$  Calcd for  $\text{C}_{40}\text{H}_{40}\text{N}_2\text{NaO}_9\text{S}_4$ : 843.1509; Found: 843.1513.

**(*E*)-*N,N'*-(3-(4-(cyclohexylmethoxy)phenyl)pent-2-ene-1,4-diyl)bis(*N*-(phenylsulfonyl)benzenesulfonamide) (2k)**

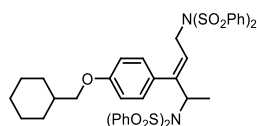

**2k**

Compound **2k** was isolated via column chromatography (PE: EA= 3: 1) as white solid (124 mg, 37% yield).

**Melting Point:** 133.5-134.5°C.

$^1\text{H}$  NMR (400 MHz, Chloroform-*d*)  $\delta$  8.03 – 7.70 (m, 8H), 7.65 – 7.54 (m, 4H), 7.54 –

7.37 (m, 8H), 6.89 (d,  $J = 8.6$  Hz, 2H), 6.72 (d,  $J = 8.7$  Hz, 2H), 5.72 (m, 1H), 5.23 – 5.10 (m, 1H), 4.29 (m, 1H), 4.07 (m, 1H), 3.74 (d,  $J = 6.3$  Hz, 2H), 1.95 – 1.86 (m, 2H), 1.86 – 1.68 (m, 4H), 1.36 (d,  $J = 7.1$  Hz, 3H), 1.33 – 1.20 (m, 3H), 1.10 (m, 2H).

$^{13}\text{C}$  NMR (101 MHz, Chloroform- $d$ )  $\delta$  159.0, 141.9, 139.9, 133.9, 133.7, 130.2, 129.2, 128.9, 128.6, 128.3, 125.5, 114.2, 73.5, 62.0, 48.3, 37.9, 30.1, 30.1, 26.6, 25.9, 18.6.

HRMS (ESI)  $m/z$ :  $[\text{M}+\text{Na}]^+$  Calcd for  $\text{C}_{42}\text{H}_{44}\text{N}_2\text{NaO}_9\text{S}_4$ : 871.1822; Found: 871.1825.

**(*E*)- $N,N'$ -(3-(4-(cyclopentylmethoxy)phenyl)pent-2-ene-1,4-diyl)bis(*N*-(phenylsulfonyl)benzenesulfonamide) (2l)**

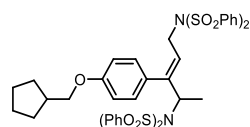

**2l**

Compound **2l** was isolated via column chromatography (PE: EA= 3: 1) as white solid (144 mg, 42% yield).

**Melting Point:** 131.3-132.2°C.

$^1\text{H}$  NMR (400 MHz, Chloroform- $d$ )  $\delta$  7.99 – 7.71 (m, 8H), 7.65 – 7.54 (m, 4H), 7.47 (m, 8H), 6.92 – 6.83 (m, 2H), 6.73 (d,  $J = 8.5$  Hz, 2H), 5.72 (m, 1H), 5.24 – 5.11 (m, 1H), 4.29 (m, 1H), 4.08 (dd,  $J = 17.4, 7.2$  Hz, 1H), 3.82 (d,  $J = 6.9$  Hz, 2H), 2.39 (m, 1H), 1.89 (m, 2H), 1.74 – 1.60 (m, 4H), 1.38 (dd,  $J = 15.9, 6.6$  Hz, 5H).

$^{13}\text{C}$  NMR (101 MHz, Chloroform- $d$ )  $\delta$  159.0, 141.9, 139.9, 133.9, 133.7, 130.2, 129.2, 129.0, 128.6, 128.5, 128.4, 125.5, 114.2, 72.2, 62.0, 48.3, 39.2, 29.7, 29.6, 25.6, 18.7.

HRMS (ESI)  $m/z$ :  $[\text{M}+\text{Na}]^+$  Calcd for  $\text{C}_{41}\text{H}_{42}\text{N}_2\text{NaO}_9\text{S}_4$ : 857.1665; Found: 857.1669.

**(*E*)- $N,N'$ -(3-(4-(2-methoxyethoxy)phenyl)pent-2-ene-1,4-diyl)bis(*N*-(phenylsulfonyl)benzenesulfonamide) (2m)**

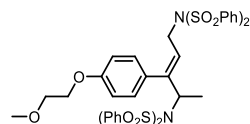

**2m**

Compound **2m** was isolated via column chromatography (PE: EA= 3: 1) as white solid (215 mg, 66% yield).

**Melting Point:** 128.5-129.4°C.

**<sup>1</sup>H NMR** (400 MHz, Chloroform-*d*) δ 8.01 – 7.71 (m, 8H), 7.59 (m, 4H), 7.47 (m, 8H), 6.90 (d, *J* = 8.6 Hz, 2H), 6.76 (d, *J* = 8.5 Hz, 2H), 5.74 (m, 1H), 5.17 (q, *J* = 7.2 Hz, 1H), 4.28 (m, 1H), 4.14 – 4.01 (m, 3H), 3.77 (dd, *J* = 5.6, 3.8 Hz, 2H), 3.47 (s, 3H), 1.36 (d, *J* = 7.0 Hz, 3H).

**<sup>13</sup>C NMR** (101 MHz, Chloroform-*d*) δ 158.5, 141.7, 139.9, 133.9, 133.7, 130.2, 129.2, 129.0, 128.6, 128.3, 125.6, 114.3, 71.1, 67.3, 61.9, 59.4, 48.2, 18.6.

**HRMS** (ESI) *m/z*: [M+Na]<sup>+</sup> Calcd for C<sub>38</sub>H<sub>38</sub>N<sub>2</sub>NaO<sub>10</sub>S<sub>4</sub>: 833.1301; Found: 833.1305.

**(*E*)-*N,N'*-(3-(4-phenoxyphenyl)pent-2-ene-1,4-diyl)bis(*N*-(phenylsulfonyl)benzenesulfonamide) (2n)**

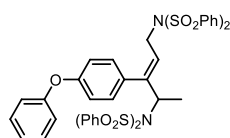

**2n**

Compound **2n** was isolated via column chromatography (PE: EA= 3: 1) as white solid (127 mg, 38% yield).

**Melting Point:** 144.7-145.6°C.

**<sup>1</sup>H NMR** (400 MHz, Chloroform-*d*) δ 8.04 – 7.79 (m, 8H), 7.61 (m, 4H), 7.50 (m, 8H), 7.38 (t, *J* = 7.9 Hz, 2H), 7.16 (t, *J* = 7.4 Hz, 1H), 7.06 (d, *J* = 8.0 Hz, 2H), 6.95 (d, *J* = 8.2 Hz, 2H), 6.85 (d, *J* = 8.3 Hz, 2H), 5.78 (m, 1H), 5.17 (q, *J* = 7.1 Hz, 1H), 4.29 (m, 1H), 4.10 (dd, *J* = 17.3, 7.2 Hz, 1H), 1.37 (d, *J* = 7.0 Hz, 3H).

**<sup>13</sup>C NMR** (101 MHz, Chloroform-*d*) δ 157.3, 156.6, 141.6, 139.9, 134.0, 133.8, 131.2, 130.5, 130.0, 129.2, 129.0, 128.7, 128.4, 126.0, 123.9, 119.5, 118.1, 61.8, 48.2, 18.7.

**HRMS** (ESI) *m/z*: [M+Na]<sup>+</sup> Calcd for C<sub>41</sub>H<sub>36</sub>N<sub>2</sub>NaO<sub>9</sub>S<sub>4</sub>: 851.1196; Found: 851.1199.

**(*E*)-*N,N',N''*-(3-(4-phenoxyphenyl)pent-3-ene-1,2,5-triyl)tris(*N*-(phenylsulfonyl)benzenesulfonamide) (4n)**

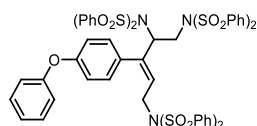

**4n**

Compound **4n** was isolated via column chromatography (PE: EA= 2: 1) as white solid (22 mg, 5% yield).

**Melting Point:** 130.2-131.0°C.

**<sup>1</sup>H NMR** (400 MHz, Chloroform-*d*) δ 8.17 (d, *J* = 7.8 Hz, 2H), 8.08 (d, *J* = 7.5 Hz, 4H), 7.95 (d, *J* = 7.2 Hz, 4H), 7.74 – 7.62 (m, 5H), 7.61 – 7.53 (m, 6H), 7.47 (dd, *J* = 14.7, 7.4 Hz, 7H), 7.35 (t, *J* = 7.9 Hz, 2H), 7.30 – 7.23 (m, 2H), 7.13 (t, *J* = 7.4 Hz, 1H), 7.02 (d, *J* = 8.0 Hz, 2H), 6.79 (d, *J* = 8.3 Hz, 2H), 6.34 (d, *J* = 8.1 Hz, 2H), 6.01 (dd, *J* = 7.9, 3.4 Hz, 1H), 5.90 (dd, *J* = 6.9, 4.3 Hz, 1H), 4.61 (dd, *J* = 15.4, 6.9 Hz, 1H), 4.26 (m, 2H), 4.01 (dd, *J* = 17.7, 7.9 Hz, 1H).

**<sup>13</sup>C NMR** (101 MHz, Chloroform-*d*) δ 157.3, 156.7, 140.7, 139.8, 139.6, 138.4, 137.3, 134.4, 134.1, 134.0, 133.7, 130.9, 130.5, 130.3, 130.0, 129.5, 129.5, 129.3, 129.2, 128.7, 128.3, 123.7, 119.4, 118.2, 65.2, 50.3, 48.0.

**HRMS** (ESI) *m/z*: [M+Na]<sup>+</sup> Calcd for C<sub>53</sub>H<sub>45</sub>N<sub>3</sub>NaO<sub>13</sub>S<sub>6</sub>: 1146.1169; Found: 1146.1172.

**(*E*)-*N,N'*-(3-(3-fluoro-4-methoxyphenyl)pent-2-ene-1,4-diyl)bis(*N*-(phenylsulfonyl)benzenesulfonamide) (2o)**

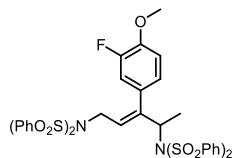

**2o**

Compound **2o** was isolated via column chromatography (PE: EA= 3: 1) as white solid (175 mg, 55% yield).

**Melting Point:** 142.3-143.1°C.

**<sup>1</sup>H NMR** (400 MHz, Chloroform-*d*) δ 8.01 – 7.75 (m, 8H), 7.65 – 7.57 (m, 4H), 7.49 (m, 8H), 6.85 – 6.72 (m, 2H), 6.53 (dd, *J* = 11.8, 1.8 Hz, 1H), 5.74 (m, 1H), 5.12 – 4.99 (m, 1H), 4.26 (m, 1H), 4.04 – 3.95 (m, 1H), 3.88 (s, 3H), 1.42 (d, *J* = 7.0 Hz, 3H).

**<sup>13</sup>C NMR** (101 MHz, Chloroform-*d*) δ 152.8, 150.4, 147.3, 147.2, 140.8, 139.8, 134.0, 133.8, 129.2, 129.0, 128.6, 128.3, 126.5, 125.3, 125.3, 116.8, 116.6, 112.9, 112.9, 62.0, 56.2, 48.1, 18.7.

**<sup>19</sup>F NMR** (376 MHz, Chloroform-*d*) δ -134.1.

**HRMS** (ESI) *m/z*: [M+H]<sup>+</sup> Calcd for C<sub>36</sub>H<sub>34</sub>FN<sub>2</sub>O<sub>9</sub>S<sub>4</sub>: 807.0945; Found: 807.0950.

**(*E*)-*N,N'*-(3-(3-fluoro-4-methoxyphenyl)pent-2-ene-2,4-diyl)bis(*N*-(phenylsulfonyl)**

**benzenesulfonamide) (3o)**

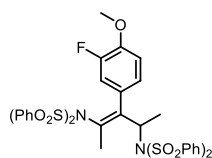

**3o**

Compound **3o** was isolated via column chromatography (PE: EA= 3: 1) as white solid (7 mg, 2% yield).

**Melting Point:** 113.3-114.2°C.

**<sup>1</sup>H NMR** (400 MHz, Chloroform-*d*)  $\delta$  8.03 – 7.92 (m, 4H), 7.92 – 7.82 (m, 2H), 7.75 – 7.59 (m, 5H), 7.59 – 7.50 (m, 5H), 7.47 (t, *J* = 7.8 Hz, 2H), 7.35 (t, *J* = 7.8 Hz, 2H), 6.81 (s, 1H), 6.58 (d, *J* = 8.8 Hz, 1H), 6.31 (s, 1H), 5.59 (q, *J* = 7.3 Hz, 1H), 3.81 (s, 3H), 2.26 (s, 3H), 1.51 (d, *J* = 7.3 Hz, 3H).

**<sup>13</sup>C NMR** (101 MHz, Chloroform-*d*)  $\delta$  151.9, 149.5, 147.0, 146.9, 146.6, 140.3, 139.6, 134.0, 134.0, 133.9, 130.9, 129.3, 129.1, 129.1, 128.8, 128.7, 126.8, 118.6, 118.4, 111.7, 60.4, 56.0, 21.2, 18.8.

**<sup>19</sup>F NMR** (376 MHz, Chloroform-*d*)  $\delta$  -135.1.

**HRMS** (ESI) *m/z*: [M+H]<sup>+</sup> Calcd for C<sub>36</sub>H<sub>34</sub>FN<sub>2</sub>O<sub>9</sub>S<sub>4</sub>: 807.0945; Found: 807.0950.

**(E)-N,N'-(3-(3-chloro-4-methoxyphenyl)pent-2-ene-1,4-diyl)bis(N-phenylsulfonyl)benzenesulfonamide) (2p)**

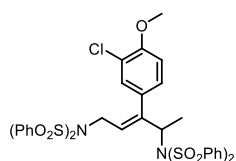

**2p**

Compound **2p** was isolated via column chromatography (PE: EA= 3: 1) as white solid (166 mg, 52% yield).

**Melting Point:** 125.6-126.4°C.

**<sup>1</sup>H NMR** (400 MHz, Chloroform-*d*)  $\delta$  8.00 – 7.80 (m, 8H), 7.65 – 7.57 (m, 4H), 7.55 – 7.43 (m, 8H), 6.99 (dd, *J* = 8.4, 2.2 Hz, 1H), 5.76 (m, 1H), 5.09 (m, 1H), 4.25 (m, 1H), 3.98 (m, 1H), 3.89 (s, 3H), 1.43 (d, *J* = 7.0 Hz, 3H).

$^{13}\text{C}$  NMR (101 MHz, Chloroform-*d*)  $\delta$  154.6, 140.5, 139.8, 134.0, 133.9, 130.6, 129.7, 129.2, 129.0, 129.0, 128.7, 128.3, 126.7, 122.1, 111.7, 62.0, 56.2, 48.0, 18.7.

HRMS (ESI)  $m/z$ :  $[\text{M}+\text{Na}]^+$  Calcd for  $\text{C}_{36}\text{H}_{33}\text{ClN}_2\text{NaO}_9\text{S}_4$ : 823.0649; Found: 823.0650.

**(*E*)-*N,N,N'*-(3-(3-chloro-4-methoxyphenyl)pent-3-ene-1,2,5-triyl)tris(*N*-phenylsulfonyl)benzenesulfonamide) (4p)**

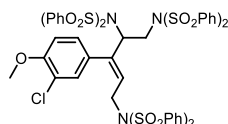

**4p**

Compound **4p** was isolated via column chromatography (PE: EA= 3: 1) as yellow solid (13 mg, 3% yield).

**Melting Point:** 169.3-170.1°C.

$^1\text{H}$  NMR (400 MHz, Chloroform-*d*)  $\delta$  8.14 (dd,  $J = 8.5, 1.2$  Hz, 2H), 8.09 – 8.01 (m, 4H), 7.96 – 7.89 (m, 4H), 7.72 – 7.63 (m, 5H), 7.58 (m, 6H), 7.51 – 7.41 (m, 7H), 7.29 – 7.23 (m, 2H), 6.76 (d,  $J = 8.6$  Hz, 1H), 6.61 (dd,  $J = 8.5, 2.2$  Hz, 1H), 6.08 (dd,  $J = 7.7, 3.6$  Hz, 1H), 6.02 (d,  $J = 2.2$  Hz, 1H), 5.85 (t,  $J = 5.7$  Hz, 1H), 4.53 (dd,  $J = 15.3, 6.5$  Hz, 1H), 4.35 (dd,  $J = 15.4, 5.0$  Hz, 1H), 4.24 (dd,  $J = 17.7, 3.7$  Hz, 1H), 3.95 (dd,  $J = 17.7, 7.7$  Hz, 1H), 3.87 (s, 3H).

$^{13}\text{C}$  NMR (101 MHz, Chloroform-*d*)  $\delta$  154.8, 140.6, 139.5, 139.5, 138.4, 136.0, 134.4, 134.2, 134.1, 133.7, 131.6, 130.4, 130.3, 129.4, 129.4, 129.3, 129.2, 128.9, 128.7, 128.5, 128.3, 121.9, 111.8, 65.0, 56.2, 50.3, 47.8.

HRMS (ESI)  $m/z$ :  $[\text{M}+\text{Na}]^+$  Calcd for  $\text{C}_{48}\text{H}_{42}\text{ClN}_3\text{NaO}_{13}\text{S}_6$ : 1118.0622; Found: 1118.0625.

**(*E*)-*N,N'*-(3-(3-bromo-4-methoxyphenyl)pent-2-ene-1,4-diyl)bis(*N*-phenylsulfonyl)benzenesulfonamide) (2q)**

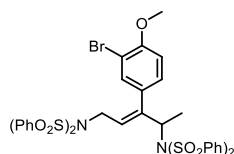

**2q**

Compound **2q** was isolated via column chromatography (PE: EA= 3: 1) as white solid (143 mg, 42% yield).



**Melting Point:** 116.5-117.3°C.

**<sup>1</sup>H NMR** (400 MHz, Chloroform-*d*) δ 7.98 – 7.83 (m, 8H), 7.60 (m, 4H), 7.54 – 7.43 (m, 8H), 7.06 – 6.97 (m, 2H), 6.72 (d, *J* = 8.4 Hz, 1H), 5.78 (m, 1H), 5.10 (m, 1H), 4.26 (m, 1H), 3.99 (m, 1H), 3.86 (s, 3H), 1.43 (d, *J* = 7.0 Hz, 3H).

**<sup>13</sup>C NMR** (101 MHz, Chloroform-*d*) δ 155.4, 140.4, 139.7, 134.0, 133.8, 133.5, 130.1, 129.4, 129.2, 129.1, 128.9, 128.3, 126.7, 111.5, 111.4, 62.0, 56.2, 47.9, 18.6.

**HRMS** (ESI) *m/z*: [M+Na]<sup>+</sup> Calcd for C<sub>36</sub>H<sub>33</sub>BrN<sub>2</sub>NaO<sub>9</sub>S<sub>4</sub>: 867.0144; Found: 867.0146.

**(*E*)-*N,N'*-(3-(3-iodo-4-methoxyphenyl)pent-2-ene-1,4-diyl)bis(*N*-(phenylsulfonyl)benzenesulfonamide) (2r)**

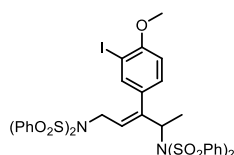

**2r**

Compound **2r** was isolated via column chromatography (PE: EA= 3: 1) as white solid (167 mg, 47% yield).

**Melting Point:** 119.2-120.4°C.

**<sup>1</sup>H NMR** (400 MHz, Chloroform-*d*) δ 8.00 – 7.78 (m, 8H), 7.65 – 7.57 (m, 4H), 7.50 (m, 8H), 7.24 (d, *J* = 2.1 Hz, 1H), 7.07 (dd, *J* = 8.4, 2.1 Hz, 1H), 6.64 (d, *J* = 8.4 Hz, 1H), 5.76 (m, 1H), 5.12 – 5.04 (m, 1H), 4.25 (m, 1H), 3.99 (dd, *J* = 17.3, 7.2 Hz, 1H), 3.87 (s, 3H), 1.42 (d, *J* = 7.0 Hz, 3H).

**<sup>13</sup>C NMR** (101 MHz, Chloroform-*d*) δ 157.7, 140.3, 139.8, 139.6, 134.0, 133.9, 130.8, 130.5, 129.3, 129.0, 128.4, 126.7, 110.5, 85.9, 62.1, 56.4, 48.0, 18.7.

**HRMS** (ESI) *m/z*: [M+Na]<sup>+</sup> Calcd for C<sub>36</sub>H<sub>33</sub>IN<sub>2</sub>NaO<sub>9</sub>S<sub>4</sub>: 915.0006; Found: 915.0009.

**(*E*)-*N,N'*-(3-(2,3-dihydrobenzo[*b*][1,4]dioxin-6-yl)pent-2-ene-1,4-diyl)bis(*N*-(phenylsulfonyl)benzenesulfonamide) (2s)**

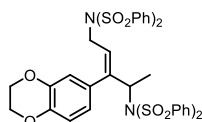

**2s**

Compound **2s** was isolated via column chromatography (PE: EA= 3: 1) as white solid (210 mg, 66% yield).

**Melting Point:** 147.0-148.1°C.

**<sup>1</sup>H NMR** (400 MHz, Chloroform-*d*) δ 8.05 – 7.76 (m, 8H), 7.64 – 7.56 (m, 4H), 7.55 – 7.40 (m, 8H), 6.71 (d, *J* = 8.7 Hz, 1H), 6.48 (dd, *J* = 4.4, 2.4 Hz, 2H), 5.71 (m, 1H), 5.20 – 5.05 (m, 1H), 4.35 – 4.17 (m, 5H), 4.11 (m, 1H), 1.33 (d, *J* = 7.1 Hz, 3H).

**<sup>13</sup>C NMR** (101 MHz, Chloroform-*d*) δ 143.3, 141.3, 139.9, 133.9, 133.7, 129.8, 129.2, 128.9, 128.7, 128.4, 125.9, 122.2, 118.1, 117.2, 64.5, 64.4, 61.9, 48.3, 18.6.

**HRMS** (ESI) *m/z*: [M+Na]<sup>+</sup> Calcd for C<sub>37</sub>H<sub>34</sub>N<sub>2</sub>NaO<sub>10</sub>S<sub>4</sub>: 817.0988; Found: 817.0990.

**(*E*)-*N,N'*-(3-(3,4-dimethoxyphenyl)pent-2-ene-1,4-diyl)bis(*N*-(phenylsulfonyl)benzenesulfonamide) (2t)**

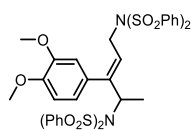

**2t**

Compound **2t** was isolated via column chromatography (PE: EA= 3: 1) as yellow solid (155 mg, 49% yield).

**Melting Point:** 113.2-114.1°C.

**<sup>1</sup>H NMR** (400 MHz, Chloroform-*d*) δ 8.02 – 7.73 (m, 8H), 7.64 – 7.55 (m, 4H), 7.54 – 7.38 (m, 8H), 6.68 (dd, *J* = 5.1, 3.2 Hz, 2H), 6.55 (dd, *J* = 8.1, 1.9 Hz, 1H), 5.77 – 5.69 (m, 1H), 5.12 (q, *J* = 7.2, 6.8 Hz, 1H), 4.28 (m, 1H), 4.05 (dd, *J* = 17.4, 6.8 Hz, 1H), 3.89 (s, 3H), 3.77 (s, 3H), 1.43 (d, *J* = 7.0 Hz, 3H).

**<sup>13</sup>C NMR** (101 MHz, Chloroform-*d*) δ 148.5, 148.5, 142.1, 139.8, 133.8, 133.6, 129.2, 129.1, 128.8, 128.5, 128.3, 125.5, 121.2, 112.3, 110.7, 62.3, 55.8, 55.8, 48.2, 18.6.

**HRMS** (ESI) *m/z*: [M+Na]<sup>+</sup> Calcd for C<sub>37</sub>H<sub>36</sub>N<sub>2</sub>NaO<sub>10</sub>S<sub>4</sub>: 819.1145; Found: 819.1150.

**(*E*)-*N,N'*-(3-(3,4,5-trimethoxyphenyl)pent-2-ene-1,4-diyl)bis(*N*-(phenylsulfonyl)benzenesulfonamide) (2u)**

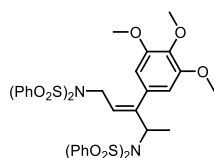

**2u**

Compound **2u** was isolated via column chromatography (PE: EA= 3: 1) as yellow solid (110 mg, 33% yield).

**Melting Point:** 125.4-126.6°C.

**<sup>1</sup>H NMR** (400 MHz, Chloroform-*d*) δ 8.05 – 7.71 (m, 8H), 7.66 – 7.56 (m, 4H), 7.56 – 7.36 (m, 8H), 6.36 (s, 2H), 5.79 – 5.70 (m, 1H), 5.12 – 5.02 (m, 1H), 4.29 (m, 1H), 4.05 – 3.96 (m, 1H), 3.87 (s, 3H), 3.76 (s, 6H), 1.49 (d, *J* = 6.9 Hz, 3H).

**<sup>13</sup>C NMR** (101 MHz, Chloroform-*d*) δ 153.0, 142.6, 139.9, 137.3, 134.0, 133.8, 132.3, 129.2, 128.9, 128.4, 125.6, 106.2, 62.3, 61.0, 56.2, 48.2, 18.7.

**HRMS** (ESI) *m/z*: [M+Na]<sup>+</sup> Calcd for C<sub>38</sub>H<sub>38</sub>N<sub>2</sub>NaO<sub>11</sub>S<sub>4</sub>: 849.1250; Found: 849.1251.

**(*E*)-*N,N'*-(3-([1,1'-biphenyl]-4-yl)pent-2-ene-1,4-diyl)bis(*N*-(phenylsulfonyl)benzenesulfonamide) (2v)**

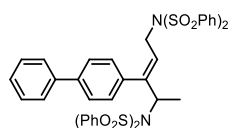

**2v**

Compound **2v** was isolated via column chromatography (PE: EA= 3: 1) as white solid (109 mg, 60% yield).

**Melting Point:** 148.5-149.9°C.

**<sup>1</sup>H NMR** (400 MHz, Chloroform-*d*) δ 8.00 – 7.73 (m, 8H), 7.64 – 7.58 (m, 4H), 7.56 – 7.46 (m, 10H), 7.41 (t, *J* = 7.4 Hz, 5H), 7.12 (d, *J* = 7.9 Hz, 2H), 5.80 (dd, *J* = 7.1, 4.9 Hz, 1H), 5.25 (q, *J* = 7.2 Hz, 1H), 4.34 (dd, *J* = 17.3, 4.8 Hz, 1H), 4.08 (dd, *J* = 17.4, 7.2 Hz, 1H), 1.43 (d, *J* = 7.0 Hz, 3H).

**<sup>13</sup>C NMR** (101 MHz, Chloroform-*d*) δ 142.0, 140.6, 140.5, 139.8, 135.8, 134.0, 133.7, 129.7, 129.2, 129.1, 129.0, 128.6, 128.4, 127.7, 127.0, 126.9, 125.8, 61.8, 48.1, 18.7.

**HRMS** (ESI) *m/z*: [M+Na]<sup>+</sup> Calcd for C<sub>41</sub>H<sub>36</sub>N<sub>2</sub>NaO<sub>8</sub>S<sub>4</sub>: 835.1246; Found: 835.1250.

**(*E*)-*N,N'*-(3-(4'-methoxy-[1,1'-biphenyl]-4-yl)pent-2-ene-1,4-diyl)bis(*N*-(phenylsulfonyl)benzenesulfonamide) (2w)**

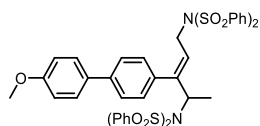

**2w**

Compound **2w** was isolated via column chromatography (PE: EA= 3: 1) as white solid (119 mg, 56% yield).

**Melting Point:** 146.7-147.8°C.

**<sup>1</sup>H NMR** (400 MHz, Chloroform-*d*) δ 8.01 – 7.68 (m, 8H), 7.63 – 7.45 (m, 10H), 7.45 – 7.32 (m, 6H), 7.08 (d, *J* = 8.1 Hz, 2H), 7.02 (d, *J* = 8.7 Hz, 2H), 5.78 (m, 1H), 5.25 (m, 1H), 4.34 (m, 1H), 4.09 (m, 1H), 3.88 (s, 3H), 1.42 (d, *J* = 7.0 Hz, 3H).

**<sup>13</sup>C NMR** (101 MHz, Chloroform-*d*) δ 159.5, 142.1, 140.2, 139.8, 135.1, 134.0, 133.7, 132.9, 129.7, 129.2, 129.0, 128.6, 128.4, 128.0, 126.4, 125.7, 114.5, 61.8, 55.5, 48.2, 18.7.

**HRMS** (ESI) *m/z*: [M+Na]<sup>+</sup> Calcd for C<sub>42</sub>H<sub>38</sub>N<sub>2</sub>NaO<sub>9</sub>S<sub>4</sub>: 865.1352; Found: 865.1355.

**(*E*)-*N,N'*-(3-(2'-methoxy-[1,1'-biphenyl]-4-yl)pent-2-ene-1,4-diyl)bis(*N*-(phenylsulfonyl)benzenesulfonamide) (2x)**

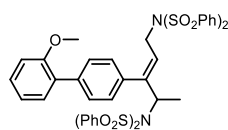

**2x**

Compound **2x** was isolated via column chromatography (PE: EA= 3: 1) as white solid (58 mg, 53% yield).

**Melting Point:** 145.4-146.3°C.

**<sup>1</sup>H NMR** (400 MHz, Chloroform-*d*) δ 8.00 – 7.70 (m, 8H), 7.63 – 7.34 (m, 16H), 7.12 – 7.02 (m, 4H), 5.81 (m, 1H), 5.31 (q, *J* = 8.1, 7.5 Hz, 1H), 4.34 (m, 1H), 4.13 (dd, *J* = 17.4, 7.1 Hz, 1H), 3.86 (s, 3H), 1.39 (d, *J* = 7.0 Hz, 3H).

**<sup>13</sup>C NMR** (101 MHz, Chloroform-*d*) δ 156.6, 142.1, 139.8, 138.2, 135.3, 133.9, 133.8, 131.0, 129.5, 129.2, 129.0, 128.9, 128.7, 128.4, 125.6, 121.1, 111.5, 61.6, 55.6, 48.1, 18.7.

**HRMS** (ESI) *m/z*: [M+Na]<sup>+</sup> Calcd for C<sub>42</sub>H<sub>38</sub>N<sub>2</sub>NaO<sub>9</sub>S<sub>4</sub>: 865.1352; Found: 865.1355.

**(*E*)-*N,N'*-(3-(4'-(tert-butyl)-[1,1'-biphenyl]-4-yl)pent-2-ene-1,4-diyl)bis(*N*-(phenylsulfonyl)benzenesulfonamide) (2y)**

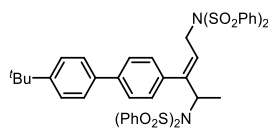

**2y**

Compound **2y** was isolated via column chromatography (PE: EA= 3: 1) as white solid (94 mg, 50% yield).

**Melting Point:** 160.0-161.6°C.

**<sup>1</sup>H NMR** (400 MHz, Chloroform-*d*) δ 7.99 – 7.74 (m, 8H), 7.64 – 7.44 (m, 15H), 7.41 (t, *J* = 7.6 Hz, 3H), 7.10 (d, *J* = 8.0 Hz, 2H), 5.79 (m, 1H), 5.30 – 5.20 (m, 1H), 4.33 (m, 1H), 4.09 (dd, *J* = 17.3, 7.2 Hz, 1H), 1.42 (d, *J* = 7.2 Hz, 3H), 1.40 (s, 9H).

**<sup>13</sup>C NMR** (101 MHz, Chloroform-*d*) δ 150.8, 142.1, 140.5, 139.8, 137.6, 135.4, 134.0, 133.7, 129.6, 129.2, 129.0, 128.6, 128.4, 126.8, 126.7, 126.0, 125.8, 61.8, 48.2, 34.7, 31.5, 18.7.

**HRMS** (ESI) *m/z*: [M+Na]<sup>+</sup> Calcd for C<sub>45</sub>H<sub>44</sub>N<sub>2</sub>NaO<sub>8</sub>S<sub>4</sub>: 891.1872; Found: 891.1875.

**(*E*)-*N,N'*-(3-(4'-(trifluoromethyl)-[1,1'-biphenyl]-4-yl)pent-2-ene-1,4-diyl)bis(*N*-(phenylsulfonyl)benzenesulfonamide) (2z)**

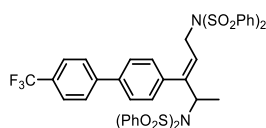

**2z**

Compound **2z** was isolated via column chromatography (PE: EA= 3: 1) as white solid (50 mg, 35% yield).

**Melting Point:** 168.2-169.4°C.

**<sup>1</sup>H NMR** (400 MHz, Chloroform-*d*) δ 7.99 – 7.79 (m, 8H), 7.77 – 7.67 (m, 5H), 7.64 – 7.59 (m, 2H), 7.54 – 7.45 (m, 7H), 7.45 – 7.33 (m, 4H), 7.20 – 7.12 (m, 2H), 5.81 (m, 1H), 5.23 (m, 1H), 4.33 (m, 1H), 4.07 (m, 1H), 1.43 (d, *J* = 7.0 Hz, 3H).

**<sup>13</sup>C NMR** (101 MHz, Chloroform-*d*) δ 144.0 141.8, 139.8, 139.0, 136.8, 134.0, 133.8, 129.9, 129.2, 129.0, 128.6, 128.4, 127.3, 127.1, 126.1, 126.1, 126.0, 61.8, 48.1, 18.7.

**<sup>19</sup>F NMR** (376 MHz, Chloroform-*d*) δ -62.4.

**HRMS** (ESI) *m/z*: [M+Na]<sup>+</sup> Calcd for C<sub>42</sub>H<sub>35</sub>F<sub>3</sub>N<sub>2</sub>NaO<sub>8</sub>S<sub>4</sub>: 903.1120; Found: 903.1122.

**(*E*)-*N,N'*-(3-(4'-fluoro-[1,1'-biphenyl]-4-yl)pent-2-ene-1,4-diyl)bis(*N*-(phenylsulfonyl)benzenesulfonamide) (2aa)**

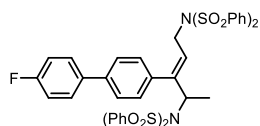

**2aa**

Compound **2aa** was isolated via column chromatography (PE: EA= 3: 1) as white solid (40 mg, 39% yield).

**Melting Point:** 154.1-155.4°C.

**<sup>1</sup>H NMR** (400 MHz, Chloroform-*d*) δ 8.06 – 7.70 (m, 8H), 7.64 – 7.30 (m, 16H), 7.22 – 7.06 (m, 4H), 5.79 (m, 1H), 5.29 – 5.15 (m, 1H), 4.33 (m, 1H), 4.08 (dd, *J* = 17.3, 7.2 Hz, 1H), 1.41 (d, *J* = 7.0 Hz, 3H).

**<sup>13</sup>C NMR** (101 MHz, Chloroform-*d*) δ 164.0, 161.5, 142.0, 139.9, 135.8, 134.0, 133.7, 129.8, 129.2, 129.0, 128.7, 128.6, 128.5, 128.4, 126.8, 125.9, 116.1, 115.9, 61.8, 48.1, 18.7.

**<sup>19</sup>F NMR** (376 MHz, Chloroform-*d*) δ -115.2.

**HRMS** (ESI) *m/z*: [M+Na]<sup>+</sup> Calcd for C<sub>41</sub>H<sub>35</sub>FN<sub>2</sub>NaO<sub>8</sub>S<sub>4</sub>: 853.1152; Found: 853.1153.

**(*E*)-*N,N'*-(3-(3'-fluoro-4'-methoxy-[1,1'-biphenyl]-4-yl)pent-2-ene-1,4-diyl)bis(*N*-(phenylsulfonyl)benzenesulfonamide) (2ab)**

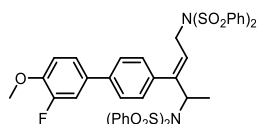

**2ab**

Compound **2ab** was isolated via column chromatography (PE: EA= 3: 1) as white solid (94 mg, 50% yield).

**Melting Point:** 121.4-122.4°C.

**<sup>1</sup>H NMR** (400 MHz, Chloroform-*d*) δ 7.98 – 7.77 (m, 8H), 7.63 – 7.58 (m, 2H), 7.57 – 7.46 (m, 7H), 7.44 – 7.36 (m, 6H), 7.36 – 7.27 (m, 2H), 7.09 (d, *J* = 8.2 Hz, 2H), 5.80 (m, 1H), 5.23 (m, 1H), 4.34 (m, 1H), 4.18 – 4.02 (m, 1H), 3.95 (s, 3H), 1.43 (d, *J* = 7.0 Hz, 3H).

**<sup>13</sup>C NMR** (101 MHz, Chloroform-*d*) δ 153.9, 151.5, 147.4, 147.3, 141.9, 139.8, 139.0, 138.9, 135.6, 134.0, 133.7, 133.6, 133.5, 129.7, 129.2, 128.9, 128.6, 128.3, 126.4, 125.8, 122.6, 122.5, 114.6, 114.4, 113.9, 61.8, 56.4, 48.1, 18.7.

**<sup>19</sup>F NMR** (376 MHz, Chloroform-*d*) δ -134.6.

**HRMS** (ESI) *m/z*: [M+Na]<sup>+</sup> Calcd for C<sub>42</sub>H<sub>37</sub>FN<sub>2</sub>NaO<sub>9</sub>S<sub>4</sub>: 883.1258; Found: 883.1260.

**(*E*)-*N,N'*-(3-(3'-bromo-4'-methoxy-[1,1'-biphenyl]-4-yl)pent-2-ene-1,4-diyl)bis(*N*-(phenylsulfonyl)benzenesulfonamide) (2ac)**

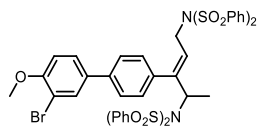

**2ac**

Compound **2ac** was isolated via column chromatography (PE: EA= 3: 1) as white solid (80 mg, 50% yield).

**Melting Point:** 115.0-115.7°C.

**<sup>1</sup>H NMR** (400 MHz, Chloroform-*d*)  $\delta$  7.97 – 7.78 (m, 8H), 7.61 (t,  $J = 7.4$  Hz, 3H), 7.52 (m, 8H), 7.40 (dd,  $J = 15.6, 7.6$  Hz, 5H), 7.08 (d,  $J = 7.9$  Hz, 2H), 7.01 (d,  $J = 8.6$  Hz, 1H), 5.78 (m, 1H), 5.28 – 5.11 (m, 1H), 4.32 (m, 1H), 4.06 (dd,  $J = 17.3, 7.2$  Hz, 1H), 3.97 (s, 3H), 1.42 (d,  $J = 6.9$  Hz, 3H).

**<sup>13</sup>C NMR** (101 MHz, Chloroform-*d*)  $\delta$  155.7, 142.0, 139.9, 138.8, 135.7, 134.4, 134.0, 133.7, 131.9, 129.7, 129.2, 129.1, 129.0, 128.6, 128.4, 126.9, 126.5, 125.9, 112.4, 61.9, 56.5, 48.1, 18.7.

**HRMS** (ESI)  $m/z$ :  $[M+Na]^+$  Calcd for C<sub>42</sub>H<sub>37</sub>BrN<sub>2</sub>NaO<sub>9</sub>S<sub>4</sub>: 943.0457; Found: 943.0460.

**(*E*)-*N,N'*-(3-([1,1':4',1''-terphenyl]-4-yl)pent-2-ene-1,4-diyl)bis(*N*-phenylsulfonyl)benzenesulfonamide (2ad)**

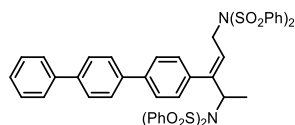

**2ad**

Compound **2ad** was isolated via column chromatography (PE: EA= 3: 1) as white solid (108 mg, 59% yield).

**Melting Point:** 160.2-160.8°C.

**<sup>1</sup>H NMR** (400 MHz, Chloroform-*d*)  $\delta$  8.05 – 7.80 (m, 8H), 7.78 – 7.64 (m, 7H), 7.61 (t,  $J = 7.5$  Hz, 2H), 7.50 (m, 10H), 7.41 (m, 4H), 7.14 (d,  $J = 8.0$  Hz, 2H), 5.81 (m, 1H), 5.31 – 5.20 (m, 1H), 4.35 (m, 1H), 4.10 (dd,  $J = 17.3, 7.2$  Hz, 1H), 1.44 (d,  $J = 7.0$  Hz, 3H).

**<sup>13</sup>C NMR** (101 MHz, Chloroform-*d*)  $\delta$  141.9, 140.5, 140.4, 139.9, 139.7, 139.2, 135.9, 135.8, 133.9, 133.7, 129.9, 129.7, 129.5, 129.1, 128.9, 128.9, 128.5, 128.3, 127.7, 127.5, 127.3, 127.1, 126.7, 125.7, 61.7, 48.0, 18.6.

**HRMS** (ESI)  $m/z$ :  $[M+Na]^+$  Calcd for C<sub>47</sub>H<sub>40</sub>N<sub>2</sub>NaO<sub>8</sub>S<sub>4</sub>: 911.1559; Found: 911.1560.

**(*E*)-*N,N'*-(3-(dibenzo[b,d]furan-2-yl)pent-2-ene-1,4-diyl)bis(*N*-phenylsulfonyl)benzenesulfonamide (2ae)**

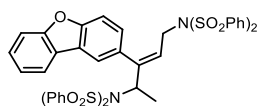

**2ae**

Compound **2ae** was isolated via column chromatography (PE: EA= 3: 1) as white solid (180 mg, 54% yield).

**Melting Point:** 113.6-114.6°C.

**<sup>1</sup>H NMR** (400 MHz, Chloroform-*d*) δ 8.02 – 7.79 (m, 9H), 7.62 – 7.55 (m, 4H), 7.53 – 7.43 (m, 8H), 7.37 (m, 4H), 7.19 (dd, *J* = 8.4, 1.8 Hz, 2H), 5.86 (m, 1H), 5.25 – 5.15 (m, 1H), 4.30 (m, 1H), 4.00 (dd, *J* = 17.3, 7.0 Hz, 1H), 1.56 (d, *J* = 7.0 Hz, 3H).

**<sup>13</sup>C NMR** (101 MHz, Chloroform-*d*) δ 156.5, 155.7, 142.1, 139.8, 134.0, 133.6, 131.4, 129.2, 129.0, 128.9, 128.3, 128.1, 127.6, 126.4, 124.1, 123.0, 121.3, 121.1, 111.8, 111.7, 62.8, 48.2, 18.9.

**HRMS** (ESI) *m/z*: [M+H]<sup>+</sup> Calcd for C<sub>41</sub>H<sub>35</sub>N<sub>2</sub>O<sub>9</sub>S<sub>4</sub>: 827.1220; Found: 827.1220.

**(E)-N,N'-(3-(8-bromodibenzo[b,d]furan-2-yl)pent-2-ene-1,4-diy)bis(N-(phenylsulfonyl)benzenesulfonamide) (2af)**

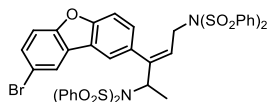

**2af**

Compound **2af** was isolated via column chromatography (PE: EA= 3: 1) as white solid (140 mg, 52% yield).

**Melting Point:** 118.1-119.3°C.

**<sup>1</sup>H NMR** (400 MHz, Chloroform-*d*) δ 8.09 – 7.72 (m, 10H), 7.63 – 7.56 (m, 4H), 7.52 – 7.35 (m, 10H), 7.21 (dd, *J* = 8.5, 1.8 Hz, 2H), 5.86 (m, 1H), 5.17 (m, 1H), 4.28 (m, 1H), 3.98 (m, 1H), 1.48 (d, *J* = 42.1 Hz, 3H).

**<sup>13</sup>C NMR** (101 MHz, Chloroform-*d*) δ 156.1, 155.2, 141.9, 139.9, 134.0, 133.6, 131.8, 130.4, 129.2, 128.9, 128.8, 128.4, 126.6, 124.0, 121.6, 115.9, 113.4, 111.9, 62.7, 48.2, 18.9.

**HRMS** (ESI) *m/z*: [M+H]<sup>+</sup> Calcd for C<sub>41</sub>H<sub>34</sub>BrN<sub>2</sub>O<sub>9</sub>S<sub>4</sub>: 905.0325; Found: 905.0327.

**(Z)-N-(3-(4-methoxyphenyl)pent-2-en-1-yl)-N-(phenylsulfonyl)benzenesulfonamide (5a(Z))**



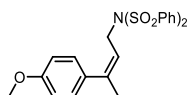

**5a(Z)**

Compound **5a(Z)** was isolated via column chromatography (PE: EA= 10: 1) as white solid (40 mg, 20% yield).

**Melting Point:** 122.3-123.3°C.

**<sup>1</sup>H NMR** (400 MHz, Chloroform-*d*) δ 8.06 (dd, *J* = 8.5, 1.3 Hz, 4H), 7.68 – 7.56 (m, 2H), 7.56 – 7.45 (m, 4H), 7.13 (d, *J* = 8.8 Hz, 2H), 6.83 (d, *J* = 8.7 Hz, 2H), 5.48 (t, *J* = 6.8 Hz, 1H), 4.58 (d, *J* = 6.9 Hz, 2H), 3.82 (s, 3H), 2.58 (q, *J* = 7.5 Hz, 2H), 1.00 (t, *J* = 7.5 Hz, 3H).

**<sup>13</sup>C NMR** (101 MHz, Chloroform-*d*) δ 159.2, 145.5, 140.4, 133.9, 133.7, 129.1, 128.3, 127.5, 120.7, 113.8, 55.4, 47.9, 23.0, 13.7.

**HRMS** (ESI) *m/z*: [M+Na]<sup>+</sup> Calcd for C<sub>24</sub>H<sub>25</sub>NNaO<sub>5</sub>S<sub>2</sub>: 494.1066; Found: 494.1069.

**(E)-N,N'-(3-(4-methoxyphenyl)pent-3-ene-1,2-diyloxy)bis(N-(phenylsulfonyl)benzenesulfonamide) (6a)**

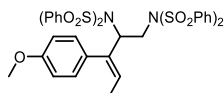

**6a**

Compound **6a** was isolated via column chromatography (PE: EA= 3: 1) as white solid (50 mg, 32% yield).

**Melting Point:** 138.2-139.3°C.

**<sup>1</sup>H NMR** (400 MHz, Chloroform-*d*) δ 8.05 – 7.97 (m, 4H), 7.92 (d, *J* = 7.9 Hz, 4H), 7.68 – 7.54 (m, 4H), 7.54 – 7.33 (m, 8H), 6.58 (d, *J* = 8.7 Hz, 2H), 6.51 – 6.39 (m, 1H), 6.25 – 6.13 (m, 2H), 5.99 (dd, *J* = 9.9, 3.9 Hz, 1H), 5.27 (dd, *J* = 15.3, 10.0 Hz, 1H), 3.97 (dd, *J* = 15.3, 3.9 Hz, 1H), 3.76 (s, 3H), 1.43 (dd, *J* = 6.9, 0.9 Hz, 3H).

**<sup>13</sup>C NMR** (101 MHz, Chloroform-*d*) δ 158.6, 139.2, 134.1, 133.7, 132.4, 131.3, 130.1, 129.9, 129.2, 128.8, 128.4, 113.3, 64.6, 55.2, 50.6, 15.2.

**HRMS** (ESI) *m/z*: [M+Na]<sup>+</sup> Calcd for C<sub>36</sub>H<sub>34</sub>N<sub>2</sub>NaO<sub>9</sub>S<sub>4</sub>: 789.1039; Found: 789.1042.

**(E)-N,N'-(3-(4-methoxyphenyl)pent-2-ene-1,4-diyloxy)bis(N-methylbenzenesulfonamide) (7a)**

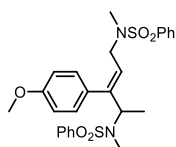

**7a**

Compound **7a** was isolated via column chromatography (PE: EA= 3: 1) as colorless oil (145 mg, 55% yield).

**<sup>1</sup>H NMR** (400 MHz, Chloroform-*d*)  $\delta$  7.71 (dd,  $J = 7.5, 1.7$  Hz, 2H), 7.54 (d,  $J = 7.3$  Hz, 1H), 7.52 – 7.40 (m, 5H), 7.32 (t,  $J = 7.7$  Hz, 2H), 6.89 (d,  $J = 8.6$  Hz, 2H), 6.78 (d,  $J = 8.6$  Hz, 2H), 5.49 (m, 1H), 4.94 (q,  $J = 6.9$  Hz, 1H), 3.80 (s, 3H), 3.75 (dd,  $J = 15.0, 5.8$  Hz, 2H), 3.44 (dd,  $J = 15.0, 7.5$  Hz, 1H), 2.58 (s, 3H), 2.53 (s, 3H), 1.14 (d,  $J = 6.9$  Hz, 3H).

**<sup>13</sup>C NMR** (101 MHz, Chloroform-*d*)  $\delta$  159.2, 144.6, 139.8, 138.1, 132.7, 132.3, 129.9, 129.5, 129.2, 128.9, 127.4, 127.2, 124.0, 114.0, 57.3, 55.3, 48.8, 34.7, 28.3, 15.8.

**HRMS** (ESI)  $m/z$ :  $[M+Na]^+$  Calcd for C<sub>26</sub>H<sub>30</sub>N<sub>2</sub>NaO<sub>5</sub>S<sub>2</sub>: 537.1488; Found: 537.1486.

**(E)-3-(4-methoxyphenyl)-N<sup>1</sup>,N<sup>4</sup>-dimethylpent-2-ene-1,4-diamine (8a)**

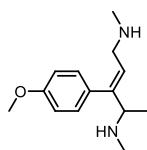

**8a**

Compound **8a** was isolated via column chromatography (DCM: MeOH= 10: 1) as yellow oil (36 mg, 60% yield).

**<sup>1</sup>H NMR** (400 MHz, Methanol-*d*<sub>4</sub>)  $\delta$  7.07 (d,  $J = 8.7$  Hz, 2H), 6.96 (d,  $J = 8.7$  Hz, 2H), 5.66 (m, 1H), 3.82 (s, 3H), 3.09 (dd,  $J = 6.8, 2.7$  Hz, 2H), 2.41 (s, 3H), 2.29 (s, 3H), 1.15 (d,  $J = 6.7$  Hz, 3H).

**<sup>13</sup>C NMR** (101 MHz, Methanol-*d*<sub>4</sub>)  $\delta$  160.5, 146.8, 131.4, 131.1, 125.9, 114.8, 62.8, 55.7, 50.0, 35.2, 33.8, 20.6.

**HRMS** (ESI)  $m/z$ :  $[M+H]^+$  Calcd for C<sub>14</sub>H<sub>23</sub>N<sub>2</sub>O: 235.1805; Found: 235.1805.

**(E)-N,N'-(3-(4-methoxyphenyl)pent-2-ene-1,4-diyl)bis(N-methylbenzamide) (9a)**

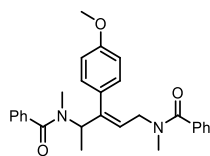

**9a**

Compound **9a** was isolated via column chromatography (EA) as colorless oil (57 mg, 76% yield).

**<sup>1</sup>H NMR** (400 MHz, Methanol-*d*<sub>4</sub>) δ 7.51 – 6.52 (m, 14H), 5.79 – 5.65 (m, 1H), 4.40 (m, 1H), 4.11 – 3.49 (m, 5H), 3.07 – 2.54 (m, 6H), 1.56 – 1.40 (m, 3H).

**<sup>13</sup>C NMR** (101 MHz, Methanol-*d*<sub>4</sub>) δ 174.5, 173.5, 160.9, 137.2, 131.0, 130.8, 130.7, 130.4, 129.6, 129.5, 129.4, 128.0, 127.7, 127.3, 125.4, 124.4, 115.1, 114.8, 60.5, 55.8, 49.4, 49.2, 49.0, 48.8, 48.6, 47.3, 33.4, 32.4, 28.1.

**HRMS** (ESI) *m/z*: [M+H]<sup>+</sup> Calcd for C<sub>28</sub>H<sub>31</sub>N<sub>2</sub>O<sub>3</sub>: 443.2329; Found: 443.2328.

## 5. X-Ray Crystallographic Data

A solution of **2a** in CHCl<sub>3</sub> and MeOH (v/v = 1:1) was evaporated the solvent slowly at room temperature. A suitable crystal was selected and measured on a Bruker APEX-II CCD diffractometer. The crystal was kept at 302.0 K during data collection. Using Olex2, the structure was solved with the SHELXT structure solution program using Intrinsic Phasing and refined with the SHELXL refinement package using Least Squares minimization.

### Crystal structure determination of (**2a**)

Crystal Data for C<sub>36</sub>H<sub>34</sub>N<sub>2</sub>O<sub>9</sub>S<sub>4</sub> (*M* = 766.89 g/mol): triclinic, space group P-1 (no. 2), *a* = 11.2497(16) Å, *b* = 12.986(2) Å, *c* = 13.162(2) Å,  $\alpha$  = 107.008(5)°,  $\beta$  = 94.207(5)°,  $\gamma$  = 101.192(5)°, *V* = 1786.4(5) Å<sup>3</sup>, *Z* = 2, *T* = 302.0 K,  $\mu$ (MoK $\alpha$ ) = 0.324 mm<sup>-1</sup>, *D*<sub>calc</sub> = 1.426 g/cm<sup>3</sup>, 39078 reflections measured (3.888° ≤ 2 $\Theta$  ≤ 49.998°), 6278 unique (*R*<sub>int</sub> = 0.1139, *R*<sub>sigma</sub> = 0.0782) which were used in all calculations. The final *R*<sub>1</sub> was 0.0518 (*I* > 2 $\sigma$ (*I*)) and *wR*<sub>2</sub> was 0.1506 (all data).

CCDC 2235969 (**2a**) contains the supplementary crystallographic data for this paper.

These data can be obtained free of charge via [www.ccdc.cam.ac.uk/data\\_request/cif](http://www.ccdc.cam.ac.uk/data_request/cif).

**Crystal data and structure for 2a** (thermal ellipsoids are shown at the 50% level).

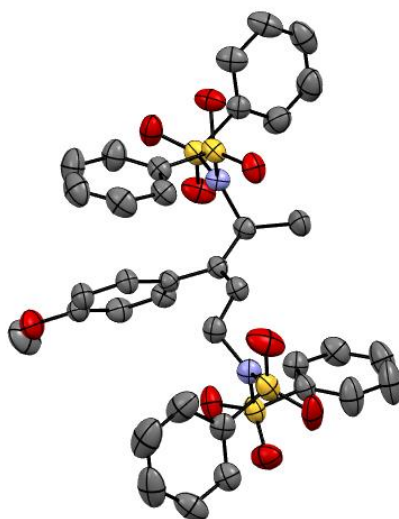

|                     |           |
|---------------------|-----------|
| Identification code | <b>2a</b> |
|---------------------|-----------|

|                                             |                                                                              |
|---------------------------------------------|------------------------------------------------------------------------------|
| Empirical formula                           | C <sub>36</sub> H <sub>34</sub> N <sub>2</sub> O <sub>9</sub> S <sub>4</sub> |
| Formula weight                              | 766.89                                                                       |
| Temperature/K                               | 302.0                                                                        |
| Crystal system                              | Triclinic                                                                    |
| Space group                                 | P-1                                                                          |
| a/Å                                         | 11.2497(16)                                                                  |
| b/Å                                         | 12.986(2)                                                                    |
| c/Å                                         | 13.162(2)                                                                    |
| α/°                                         | 107.008(5)                                                                   |
| β/°                                         | 94.207(5)                                                                    |
| γ/°                                         | 101.192(5)                                                                   |
| Volume/Å <sup>3</sup>                       | 1786.4(5)                                                                    |
| Z                                           | 2                                                                            |
| ρ <sub>calc</sub> /cm <sup>3</sup>          | 1.426                                                                        |
| μ/mm <sup>-1</sup>                          | 0.324                                                                        |
| F(000)                                      | 800.0                                                                        |
| Crystal size/mm <sup>3</sup>                | 0.5 × 0.5 × 0.3                                                              |
| Radiation                                   | MoKα (λ = 0.71073)                                                           |
| 2θ range for data collection/°              | 3.888 to 49.998                                                              |
| Index ranges                                | -13 ≤ h ≤ 13, -15 ≤ k ≤ 15, -15 ≤ l ≤ 15                                     |
| Reflections collected                       | 39078                                                                        |
| Independent reflections                     | 6278 [R <sub>int</sub> = 0.1139, R <sub>sigma</sub> = 0.0782]                |
| Data/restraints/parameters                  | 6278/0/462                                                                   |
| Goodness-of-fit on F <sup>2</sup>           | 1.021                                                                        |
| Final R indexes [I ≥ 2σ (I)]                | R <sub>1</sub> = 0.0518, wR <sub>2</sub> = 0.1308                            |
| Final R indexes [all data]                  | R <sub>1</sub> = 0.0747, wR <sub>2</sub> = 0.1506                            |
| Largest diff. peak/hole / e Å <sup>-3</sup> | 0.33/-0.34                                                                   |

A solution of **4a** in CHCl<sub>3</sub> and MeOH ((v/v = 1:1)) was evaporated the solvent slowly at room temperature. A suitable crystal was selected and measured on a Bruker APEX-II CCD diffractometer. The crystal was kept at 281.0 K during data collection. Using Olex2, the structure was solved with the SHELXT structure solution program using Intrinsic Phasing and refined with the SHELXL refinement package using Least Squares minimization.

#### Crystal structure determination of (4a)

**Crystal Data** for C<sub>48</sub>H<sub>43</sub>N<sub>3</sub>O<sub>13</sub>S<sub>6</sub> (*M* = 1062.21 g/mol): triclinic, space group P-1 (no. 2), *a* = 10.4451(10) Å, *b* = 12.2723(14) Å, *c* = 21.050(2) Å,  $\alpha$  = 91.901(3)°,  $\beta$  = 97.835(3)°,  $\gamma$  = 114.482(3)°, *V* = 2420.7(5) Å<sup>3</sup>, *Z* = 2, *T* = 281.0 K,  $\mu$ (MoK $\alpha$ ) = 0.351 mm<sup>-1</sup>, *D*<sub>calc</sub> = 1.457 g/cm<sup>3</sup>, 61377 reflections measured (3.926° ≤ 2 $\Theta$  ≤ 50°), 8535 unique (*R*<sub>int</sub> = 0.1279, *R*<sub>sigma</sub> = 0.0740) which were used in all calculations. The final *R*<sub>1</sub> was 0.0451 (*I* > 2 $\sigma$ (*I*)) and *wR*<sub>2</sub> was 0.1252 (all data).

CCDC 2305251 (**4a**) contains the supplementary crystallographic data for this paper. These data can be obtained free of charge via [www.ccdc.cam.ac.uk/data\\_request/cif](http://www.ccdc.cam.ac.uk/data_request/cif).

**Crystal data and structure for 4a** (thermal ellipsoids are shown at the 50% level).

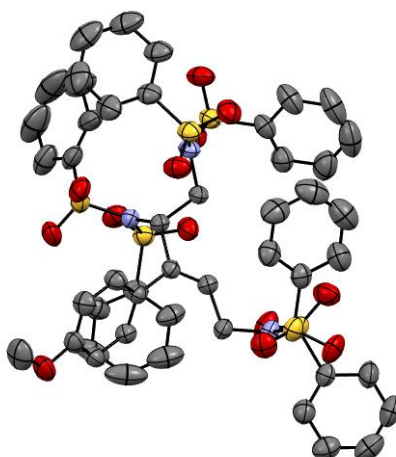

|                     |                                                                               |
|---------------------|-------------------------------------------------------------------------------|
| Identification code | <b>4a</b>                                                                     |
| Empirical formula   | C <sub>48</sub> H <sub>43</sub> N <sub>3</sub> O <sub>13</sub> S <sub>6</sub> |
| Formula weight      | 1062.21                                                                       |
| Temperature/K       | 281.0                                                                         |
| Crystal system      | triclinic                                                                     |
| Space group         | P-1                                                                           |
| <i>a</i> /Å         | 10.4451(10)                                                                   |

|                                             |                                          |
|---------------------------------------------|------------------------------------------|
| b/Å                                         | 12.2723(14)                              |
| c/Å                                         | 21.050(2)                                |
| $\alpha$ /°                                 | 91.901(3)                                |
| $\beta$ /°                                  | 97.835(3)                                |
| $\gamma$ /°                                 | 114.482(3)                               |
| Volume/Å <sup>3</sup>                       | 2420.7(5)                                |
| Z                                           | 2                                        |
| $\rho_{\text{calc}}/\text{cm}^3$            | 1.457                                    |
| $\mu/\text{mm}^{-1}$                        | 0.351                                    |
| F(000)                                      | 1104.0                                   |
| Crystal size/mm <sup>3</sup>                | 0.34 × 0.26 × 0.22                       |
| Radiation                                   | MoK $\alpha$ ( $\lambda$ = 0.71073)      |
| 2 $\Theta$ range for data collection/°      | 3.926 to 50                              |
| Index ranges                                | -12 ≤ h ≤ 11, -14 ≤ k ≤ 14, -25 ≤ l ≤ 25 |
| Reflections collected                       | 61377                                    |
| Independent reflections                     | 8535 [Rint = 0.1279, Rsigma = 0.0740]    |
| Data/restraints/parameters                  | 8535/0/632                               |
| Goodness-of-fit on F <sup>2</sup>           | 1.015                                    |
| Final R indexes [I ≥ 2 $\sigma$ (I)]        | R1 = 0.0451, wR2 = 0.1065                |
| Final R indexes [all data]                  | R1 = 0.0781, wR2 = 0.1252                |
| Largest diff. peak/hole / e Å <sup>-3</sup> | 0.23/-0.32                               |

A solution of **6a** in CHCl<sub>3</sub> and MeOH ((v/v = 1:1)) was evaporated the solvent slowly at room temperature. A suitable crystal was selected and measured on a Bruker APEX-II CCD diffractometer. The crystal was kept at 303.0 K during data collection. Using Olex2, the structure was solved with the SHELXT structure solution program using Intrinsic Phasing and refined with the SHELXL refinement package using Least Squares minimization.

### Crystal structure determination of (6a)

**Crystal Data** for C<sub>36</sub>H<sub>34</sub>N<sub>2</sub>O<sub>9</sub>S<sub>4</sub> (*M* = 766.89 g/mol): monoclinic, space group P2<sub>1</sub>/n (no. 14), *a* = 11.2841(19) Å, *b* = 20.731(3) Å, *c* = 15.751(3) Å, *β* = 98.855(5)°, *V* = 3640.7(11) Å<sup>3</sup>, *Z* = 4, *T* = 303.0 K, *μ*(MoKα) = 0.318 mm<sup>-1</sup>, *D*<sub>calc</sub> = 1.399 g/cm<sup>3</sup>, 124181 reflections measured (4.148° ≤ 2θ ≤ 49.998°), 6407 unique (*R*<sub>int</sub> = 0.1276, *R*<sub>sigma</sub> = 0.0551) which were used in all calculations. The final *R*<sub>1</sub> was 0.0515 (*I* > 2σ(*I*)) and *wR*<sub>2</sub> was 0.1511 (all data).

CCDC 2235971 (**6a**) contains the supplementary crystallographic data for this paper. These data can be obtained free of charge via [www.ccdc.cam.ac.uk/data\\_request/cif](http://www.ccdc.cam.ac.uk/data_request/cif).

**Crystal data and structure for 6a** (thermal ellipsoids are shown at the 50% level).

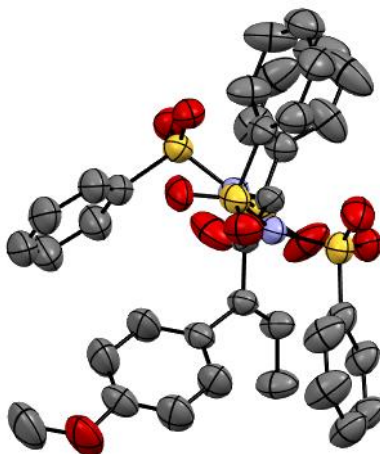

|                     |                                                                              |
|---------------------|------------------------------------------------------------------------------|
| Identification code | <b>6a</b>                                                                    |
| Empirical formula   | C <sub>36</sub> H <sub>34</sub> N <sub>2</sub> O <sub>9</sub> S <sub>4</sub> |
| Formula weight      | 766.89                                                                       |
| Temperature/K       | 303.0                                                                        |
| Crystal system      | monoclinic                                                                   |
| Space group         | P2 <sub>1</sub> /n                                                           |



|                                             |                                                                |
|---------------------------------------------|----------------------------------------------------------------|
| a/Å                                         | 11.2841(19)                                                    |
| b/Å                                         | 20.731(3)                                                      |
| c/Å                                         | 15.751(3)                                                      |
| $\alpha$ /°                                 | 90                                                             |
| $\beta$ /°                                  | 98.855(5)                                                      |
| $\gamma$ /°                                 | 90                                                             |
| Volume/Å <sup>3</sup>                       | 3640.7(11)                                                     |
| Z                                           | 4                                                              |
| $\rho_{\text{calc}}$ /cm <sup>3</sup>       | 1.399                                                          |
| $\mu$ /mm <sup>-1</sup>                     | 0.318                                                          |
| F(000)                                      | 1600.0                                                         |
| Crystal size/mm <sup>3</sup>                | 0.5 × 0.46 × 0.45                                              |
| Radiation                                   | MoK $\alpha$ ( $\lambda$ = 0.71073)                            |
| 2 $\Theta$ range for data collection/°      | 4.148 to 49.998                                                |
| Index ranges                                | -13 ≤ h ≤ 13, -24 ≤ k ≤ 24, -18 ≤ l ≤ 18                       |
| Reflections collected                       | 124181                                                         |
| Independent reflections                     | 6407 [ $R_{\text{int}}$ = 0.1276, $R_{\text{sigma}}$ = 0.0551] |
| Data/restraints/parameters                  | 6407/0/462                                                     |
| Goodness-of-fit on F <sup>2</sup>           | 1.058                                                          |
| Final R indexes [ $I \geq 2\sigma(I)$ ]     | $R_1$ = 0.0515, $wR_2$ = 0.1285                                |
| Final R indexes [all data]                  | $R_1$ = 0.0752, $wR_2$ = 0.1511                                |
| Largest diff. peak/hole / e Å <sup>-3</sup> | 0.32/-0.30                                                     |

## 6. Computational Data

### Computational Details:

The present catalyst screening experiments found that  $\text{Rh}_2(\text{OAc})_4$  could also catalyze the reaction, and therefore  $\text{Rh}_2(\text{OAc})_4$  was used as the model in calculation to guarantee the calculation precision and reduce the computational cost, The geometric optimizations were conducted at the B3LYP<sup>12, 13</sup> combined with LANL2DZ<sup>14-16</sup> for Rh atoms and 6-31G(d)<sup>17-20</sup> for other atoms. The single point calculation was performed on the optimized geometries at the M06/def2-TZVP<sup>21</sup> level with the SMD ( $\text{CHCl}_3$ ) solvent model.<sup>22, 23</sup> If other specified, the relative Gibbs free energies in the following decisions were the M06(SMD)/def2-TZVP single-point energies corrected by the B3LYP zero-Gibbs energies. NBO analysis was also used to probe the electron properties for the key species<sup>24, 25</sup>. All calculations were performed using Gaussian 09 software<sup>26</sup>.

It should be emphasized that the triplet-state and singlet-state reaction routes were investigated in the present simulation, respectively. The open-shell calculations were conducted for geometric optimization with Guess=MIX keyword. The spin contamination  $\langle S^{**} \rangle^2$  for triplet-state species in the range of 2.01~2.04 confirms those spin state species with two unpaired electrons in general; the  $\langle S^{**} \rangle^2$  for singlet-state species of zero means the full electron pairing properties for those state species except for s-TS1. This suggested the s-TS1 of some radical feature in the reaction.

Coordination of the optimized structures.

### $\text{Rh}_2(\text{OAc})_4$

Input orientation:

| Center Number | Atomic Number | Atomic Type | Coordinates (Angstroms) |           |           |
|---------------|---------------|-------------|-------------------------|-----------|-----------|
|               |               |             | X                       | Y         | Z         |
| 1             | 45            | 0           | -3.499709               | -2.692406 | -2.743666 |
| 2             | 45            | 0           | -1.637752               | -1.398325 | -1.994297 |
| 3             | 8             | 0           | -4.703474               | -1.053727 | -2.390073 |
| 4             | 8             | 0           | -2.935953               | 0.173917  | -1.677068 |
| 5             | 6             | 0           | -4.169926               | 0.014517  | -1.948070 |

|    |   |   |           |           |           |
|----|---|---|-----------|-----------|-----------|
| 6  | 6 | 0 | -5.074516 | 1.210226  | -1.757006 |
| 7  | 1 | 0 | -6.101428 | 0.886208  | -1.577366 |
| 8  | 1 | 0 | -4.713855 | 1.829565  | -0.932888 |
| 9  | 1 | 0 | -5.057138 | 1.815543  | -2.671093 |
| 10 | 8 | 0 | -2.002372 | -2.092797 | -0.084906 |
| 11 | 6 | 0 | -2.984373 | -2.881615 | 0.103173  |
| 12 | 8 | 0 | -3.775201 | -3.314931 | -0.795889 |
| 13 | 6 | 0 | -3.251223 | -3.316882 | 1.525832  |
| 14 | 1 | 0 | -3.867629 | -2.555404 | 2.018136  |
| 15 | 1 | 0 | -3.793839 | -4.263988 | 1.539734  |
| 16 | 1 | 0 | -2.312215 | -3.400393 | 2.077502  |
| 17 | 8 | 0 | -3.134837 | -1.998220 | -4.653095 |
| 18 | 8 | 0 | -1.362466 | -0.775471 | -3.942022 |
| 19 | 6 | 0 | -2.153086 | -1.209015 | -4.841108 |
| 20 | 6 | 0 | -1.886932 | -0.773531 | -6.263830 |
| 21 | 1 | 0 | -1.281934 | -1.541180 | -6.760668 |
| 22 | 1 | 0 | -2.827348 | -0.678203 | -6.811294 |
| 23 | 1 | 0 | -1.333828 | 0.167422  | -6.278031 |
| 24 | 8 | 0 | -2.201719 | -4.264858 | -3.060601 |
| 25 | 8 | 0 | -0.434064 | -3.036934 | -2.348420 |
| 26 | 6 | 0 | -0.967712 | -4.105317 | -2.790158 |
| 27 | 6 | 0 | -0.061985 | -5.300230 | -2.980801 |
| 28 | 1 | 0 | 0.955262  | -4.973751 | -3.206314 |
| 29 | 1 | 0 | -0.039037 | -5.877837 | -2.049063 |
| 30 | 1 | 0 | -0.446665 | -5.945212 | -3.773504 |

---

Thermal correction to Gibbs Free Energy= 0.155746  
 Sum of electronic and thermal Free Energies= -1132.957585  
 SCRF=-1135.13345485  
 <S\*\*>2=0.000

### s-COM

---

| Center<br>Number | Atomic<br>Number | Atomic<br>Type | Coordinates (Angstroms) |           |           |
|------------------|------------------|----------------|-------------------------|-----------|-----------|
|                  |                  |                | X                       | Y         | Z         |
| 1                | 8                | 0              | 4.252621                | -0.026465 | -0.928989 |
| 2                | 8                | 0              | 2.973192                | 1.702680  | -0.209548 |
| 3                | 6                | 0              | 4.062623                | 1.192452  | -0.630143 |
| 4                | 6                | 0              | 5.251660                | 2.121602  | -0.758609 |
| 5                | 1                | 0              | 5.842439                | 1.852538  | -1.637656 |
| 6                | 1                | 0              | 4.922883                | 3.160659  | -0.821252 |
| 7                | 1                | 0              | 5.894572                | 2.004143  | 0.121933  |
| 8                | 45               | 0              | 2.678517                | -1.354968 | -0.752448 |
| 9                | 45               | 0              | 1.288776                | 0.481659  | -0.019679 |

|    |    |   |           |           |           |
|----|----|---|-----------|-----------|-----------|
| 10 | 8  | 0 | 0.879762  | 0.826683  | -2.034792 |
| 11 | 6  | 0 | 1.358545  | 0.039989  | -2.916176 |
| 12 | 8  | 0 | 2.123336  | -0.948940 | -2.697816 |
| 13 | 6  | 0 | 0.978366  | 0.322739  | -4.353727 |
| 14 | 1  | 0 | 1.366866  | 1.303945  | -4.647768 |
| 15 | 1  | 0 | 1.384943  | -0.442971 | -5.015789 |
| 16 | 1  | 0 | -0.111960 | 0.356217  | -4.443349 |
| 17 | 8  | 0 | 3.156088  | -1.699633 | 1.225966  |
| 18 | 8  | 0 | 1.825626  | 0.001208  | 1.920575  |
| 19 | 6  | 0 | 2.614911  | -0.978523 | 2.120834  |
| 20 | 6  | 0 | 2.908537  | -1.331570 | 3.562279  |
| 21 | 1  | 0 | 2.891977  | -0.433543 | 4.183292  |
| 22 | 1  | 0 | 2.127548  | -2.011013 | 3.923767  |
| 23 | 1  | 0 | 3.871109  | -1.841307 | 3.639703  |
| 24 | 8  | 0 | 1.047920  | -2.599930 | -0.564770 |
| 25 | 8  | 0 | -0.253564 | -0.880002 | 0.134242  |
| 26 | 6  | 0 | -0.052578 | -2.098642 | -0.168759 |
| 27 | 6  | 0 | -1.242463 | -3.024564 | -0.051402 |
| 28 | 1  | 0 | -0.950586 | -4.055432 | -0.257425 |
| 29 | 1  | 0 | -1.670492 | -2.945700 | 0.952556  |
| 30 | 1  | 0 | -2.013992 | -2.707523 | -0.760865 |
| 31 | 7  | 0 | -0.238931 | 2.160454  | 0.852071  |
| 32 | 16 | 0 | -1.864037 | 2.435853  | -0.161642 |
| 33 | 16 | 0 | 0.393888  | 3.744894  | 1.575985  |
| 34 | 6  | 0 | -0.672546 | 3.738474  | -2.256467 |
| 35 | 6  | 0 | -0.435046 | 4.867191  | -3.039085 |
| 36 | 6  | 0 | -1.019698 | 6.092100  | -2.705446 |
| 37 | 6  | 0 | -1.843916 | 6.205648  | -1.582741 |
| 38 | 6  | 0 | -2.088770 | 5.093337  | -0.779444 |
| 39 | 6  | 0 | -1.497591 | 3.878802  | -1.137252 |
| 40 | 6  | 0 | 0.770578  | 3.128348  | 4.219562  |
| 41 | 6  | 0 | 1.564694  | 2.805628  | 5.318095  |
| 42 | 6  | 0 | 2.932893  | 2.570333  | 5.148746  |
| 43 | 6  | 0 | 3.515280  | 2.645866  | 3.880665  |
| 44 | 6  | 0 | 2.734936  | 2.956490  | 2.766941  |
| 45 | 6  | 0 | 1.374223  | 3.197672  | 2.960798  |
| 46 | 9  | 0 | -0.783761 | 1.504414  | 1.982219  |
| 47 | 1  | 0 | -0.222939 | 2.778031  | -2.487952 |
| 48 | 1  | 0 | 0.207953  | 4.789776  | -3.910795 |
| 49 | 1  | 0 | -0.830099 | 6.965329  | -3.323573 |
| 50 | 1  | 0 | -2.294212 | 7.160474  | -1.328727 |
| 51 | 1  | 0 | -2.712400 | 5.155596  | 0.104182  |
| 52 | 1  | 0 | -0.286666 | 3.340109  | 4.330165  |
| 53 | 1  | 0 | 1.118228  | 2.748494  | 6.306274  |

|    |   |   |           |          |           |
|----|---|---|-----------|----------|-----------|
| 54 | 1 | 0 | 3.548901  | 2.332140 | 6.011719  |
| 55 | 1 | 0 | 4.578904  | 2.463575 | 3.757316  |
| 56 | 1 | 0 | 3.154780  | 2.999486 | 1.769028  |
| 57 | 8 | 0 | 1.244432  | 4.270509 | 0.513864  |
| 58 | 8 | 0 | -0.750605 | 4.493440 | 2.094795  |
| 59 | 8 | 0 | -2.893685 | 2.730078 | 0.825783  |
| 60 | 8 | 0 | -1.926305 | 1.263780 | -1.020700 |

-----  
Thermal correction to Gibbs Free Energy= 0.343839  
Sum of electronic and thermal Free Energies= -2847.689827  
SCRF= -2849.98317440  
<S\*\*>2=0.000

### t-COM

| Center<br>Number | Atomic<br>Number | Atomic<br>Type | Coordinates (Angstroms) |           |           |
|------------------|------------------|----------------|-------------------------|-----------|-----------|
|                  |                  |                | X                       | Y         | Z         |
| 1                | 8                | 0              | 4.117451                | -0.116983 | -0.650022 |
| 2                | 8                | 0              | 2.545311                | 1.390163  | -0.046487 |
| 3                | 6                | 0              | 3.739754                | 1.054900  | -0.333514 |
| 4                | 6                | 0              | 4.781697                | 2.149504  | -0.314358 |
| 5                | 1                | 0              | 4.645895                | 2.786727  | -1.195626 |
| 6                | 1                | 0              | 4.642261                | 2.773398  | 0.572483  |
| 7                | 1                | 0              | 5.786342                | 1.724280  | -0.332118 |
| 8                | 45               | 0              | 2.732132                | -1.654380 | -0.719804 |
| 9                | 45               | 0              | 1.026364                | -0.014780 | -0.063858 |
| 10               | 8                | 0              | 0.740517                | 0.359031  | -2.099180 |
| 11               | 6                | 0              | 1.416805                | -0.305022 | -2.952518 |
| 12               | 8                | 0              | 2.302198                | -1.181657 | -2.700467 |
| 13               | 6                | 0              | 1.108672                | -0.045349 | -4.412151 |
| 14               | 1                | 0              | 0.834178                | 1.001082  | -4.564235 |
| 15               | 1                | 0              | 1.961814                | -0.315159 | -5.037241 |
| 16               | 1                | 0              | 0.251983                | -0.663450 | -4.705455 |
| 17               | 8                | 0              | 3.044405                | -2.017363 | 1.301106  |
| 18               | 8                | 0              | 1.455175                | -0.507822 | 1.909365  |
| 19               | 6                | 0              | 2.348754                | -1.380843 | 2.155448  |
| 20               | 6                | 0              | 2.590348                | -1.702019 | 3.615279  |
| 21               | 1                | 0              | 2.666257                | -0.773668 | 4.188105  |
| 22               | 1                | 0              | 1.732906                | -2.262297 | 4.004518  |
| 23               | 1                | 0              | 3.495345                | -2.299690 | 3.733880  |
| 24               | 8                | 0              | 1.240773                | -3.080091 | -0.743908 |
| 25               | 8                | 0              | -0.329020               | -1.568206 | -0.151479 |
| 26               | 6                | 0              | 0.045819                | -2.744382 | -0.459552 |

|    |    |   |           |           |           |
|----|----|---|-----------|-----------|-----------|
| 27 | 6  | 0 | -1.005247 | -3.828666 | -0.458711 |
| 28 | 1  | 0 | -0.709303 | -4.646104 | -1.118976 |
| 29 | 1  | 0 | -1.105168 | -4.222111 | 0.559723  |
| 30 | 1  | 0 | -1.971030 | -3.416485 | -0.758869 |
| 31 | 7  | 0 | -0.621238 | 2.981318  | 1.264669  |
| 32 | 16 | 0 | -2.075377 | 3.143373  | 0.147678  |
| 33 | 16 | 0 | -0.611242 | 4.037056  | 2.708744  |
| 34 | 6  | 0 | -0.535078 | 3.710868  | -2.048867 |
| 35 | 6  | 0 | -0.002726 | 4.580770  | -3.000025 |
| 36 | 6  | 0 | -0.292674 | 5.947509  | -2.947515 |
| 37 | 6  | 0 | -1.117307 | 6.460471  | -1.943130 |
| 38 | 6  | 0 | -1.658813 | 5.609122  | -0.980265 |
| 39 | 6  | 0 | -1.355887 | 4.248159  | -1.052911 |
| 40 | 6  | 0 | 1.248046  | 2.769884  | 4.286969  |
| 41 | 6  | 0 | 2.545892  | 2.551596  | 4.749900  |
| 42 | 6  | 0 | 3.613954  | 3.274076  | 4.211754  |
| 43 | 6  | 0 | 3.394471  | 4.223380  | 3.208798  |
| 44 | 6  | 0 | 2.103894  | 4.452274  | 2.733162  |
| 45 | 6  | 0 | 1.049685  | 3.719721  | 3.283281  |
| 46 | 9  | 0 | -0.704320 | 1.664104  | 1.783909  |
| 47 | 1  | 0 | -0.323873 | 2.646148  | -2.080123 |
| 48 | 1  | 0 | 0.637170  | 4.189348  | -3.785577 |
| 49 | 1  | 0 | 0.125561  | 6.616324  | -3.694834 |
| 50 | 1  | 0 | -1.340341 | 7.522607  | -1.907081 |
| 51 | 1  | 0 | -2.293198 | 5.982787  | -0.185128 |
| 52 | 1  | 0 | 0.402879  | 2.229331  | 4.697787  |
| 53 | 1  | 0 | 2.720575  | 1.824095  | 5.537240  |
| 54 | 1  | 0 | 4.621390  | 3.102710  | 4.580820  |
| 55 | 1  | 0 | 4.226456  | 4.792804  | 2.804501  |
| 56 | 1  | 0 | 1.908719  | 5.190307  | 1.962943  |
| 57 | 8  | 0 | -0.683658 | 5.370360  | 2.110877  |
| 58 | 8  | 0 | -1.555246 | 3.564345  | 3.713804  |
| 59 | 8  | 0 | -3.185995 | 3.802741  | 0.827279  |
| 60 | 8  | 0 | -2.189444 | 1.801963  | -0.411469 |

-----  
Thermal correction to Gibbs Free Energy= 0.334359  
Sum of electronic and thermal Free Energies= -2847.661809  
SCRF= -2849.95599245  
<S\*\*>2=2.009

## s-TS1

-----  
Center Atomic Atomic Coordinates (Angstroms)

| Number | Number | Type | X         | Y         | Z         |
|--------|--------|------|-----------|-----------|-----------|
| 1      | 6      | 0    | -4.407251 | -1.457649 | -1.122191 |
| 2      | 6      | 0    | -5.224309 | -2.316385 | -0.351015 |
| 3      | 6      | 0    | -6.370757 | -1.852900 | 0.273547  |
| 4      | 6      | 0    | -6.728124 | -0.494756 | 0.182213  |
| 5      | 6      | 0    | -5.917110 | 0.385419  | -0.552918 |
| 6      | 6      | 0    | -4.782197 | -0.096871 | -1.192710 |
| 7      | 6      | 0    | -3.164865 | -1.905185 | -1.807342 |
| 8      | 6      | 0    | -3.115206 | -1.585362 | -3.327731 |
| 9      | 6      | 0    | -1.257356 | -3.647911 | -1.936791 |
| 10     | 6      | 0    | -2.665951 | -3.305971 | -1.436283 |
| 11     | 6      | 0    | -1.875292 | -0.842867 | -3.846540 |
| 12     | 1      | 0    | -7.015226 | -2.519470 | 0.838181  |
| 13     | 8      | 0    | -7.858778 | -0.139012 | 0.839406  |
| 14     | 1      | 0    | -6.149189 | 1.442111  | -0.612078 |
| 15     | 1      | 0    | -4.136919 | 0.604708  | -1.713149 |
| 16     | 1      | 0    | -3.209731 | -2.550916 | -3.847654 |
| 17     | 1      | 0    | -4.006428 | -1.011006 | -3.600269 |
| 18     | 1      | 0    | -0.970907 | -4.648561 | -1.592600 |
| 19     | 1      | 0    | -1.202969 | -3.651289 | -3.030775 |
| 20     | 1      | 0    | -2.685013 | -3.412094 | -0.345194 |
| 21     | 1      | 0    | -3.379131 | -4.045034 | -1.836318 |
| 22     | 1      | 0    | -1.886430 | -0.824788 | -4.942951 |
| 23     | 1      | 0    | -1.861798 | 0.189288  | -3.490600 |
| 24     | 1      | 0    | -0.941939 | -1.306883 | -3.519487 |
| 25     | 1      | 0    | -4.977027 | -3.369338 | -0.268610 |
| 26     | 1      | 0    | -0.526869 | -2.926850 | -1.556903 |
| 27     | 1      | 0    | -2.325243 | -1.160784 | -1.315272 |
| 28     | 8      | 0    | 4.239878  | -0.566102 | 1.888101  |
| 29     | 8      | 0    | 2.240096  | 0.502480  | 1.923282  |
| 30     | 6      | 0    | 3.356759  | 0.163916  | 2.433856  |
| 31     | 6      | 0    | 3.644081  | 0.656732  | 3.836753  |
| 32     | 1      | 0    | 3.400496  | -0.138523 | 4.551556  |
| 33     | 1      | 0    | 4.707717  | 0.883755  | 3.942474  |
| 34     | 1      | 0    | 3.038500  | 1.535558  | 4.066183  |
| 35     | 45     | 0    | 3.881208  | -1.303143 | -0.007641 |
| 36     | 45     | 0    | 1.761217  | -0.116191 | -0.010040 |
| 37     | 8      | 0    | 2.842316  | 1.518462  | -0.734006 |
| 38     | 6      | 0    | 4.081496  | 1.397174  | -1.001064 |
| 39     | 8      | 0    | 4.785636  | 0.355987  | -0.824769 |
| 40     | 6      | 0    | 4.773549  | 2.617058  | -1.571031 |
| 41     | 1      | 0    | 5.789123  | 2.369633  | -1.883563 |
| 42     | 1      | 0    | 4.199897  | 3.002847  | -2.419003 |

|    |    |   |           |           |           |
|----|----|---|-----------|-----------|-----------|
| 43 | 1  | 0 | 4.811203  | 3.402483  | -0.807744 |
| 44 | 8  | 0 | 2.902902  | -2.932236 | 0.793522  |
| 45 | 8  | 0 | 0.905912  | -1.859339 | 0.720527  |
| 46 | 6  | 0 | 1.645223  | -2.868858 | 0.957202  |
| 47 | 6  | 0 | 0.951930  | -4.120893 | 1.448658  |
| 48 | 1  | 0 | 0.072804  | -3.860190 | 2.041011  |
| 49 | 1  | 0 | 0.622173  | -4.702984 | 0.580061  |
| 50 | 1  | 0 | 1.644980  | -4.733377 | 2.029332  |
| 51 | 8  | 0 | 3.467961  | -1.970966 | -1.908509 |
| 52 | 8  | 0 | 1.486842  | -0.865543 | -1.927502 |
| 53 | 6  | 0 | 2.382881  | -1.595939 | -2.456704 |
| 54 | 6  | 0 | 2.118648  | -2.080419 | -3.866063 |
| 55 | 1  | 0 | 1.721871  | -1.260634 | -4.470457 |
| 56 | 1  | 0 | 3.032972  | -2.477635 | -4.310135 |
| 57 | 1  | 0 | 1.361269  | -2.871949 | -3.838160 |
| 58 | 7  | 0 | -0.294526 | 1.002174  | -0.027580 |
| 59 | 16 | 0 | -0.648444 | 2.151162  | -1.395057 |
| 60 | 16 | 0 | -1.229947 | 1.354870  | 1.446963  |
| 61 | 6  | 0 | 0.973259  | 4.169826  | -0.461362 |
| 62 | 6  | 0 | 1.194487  | 5.440192  | 0.068691  |
| 63 | 6  | 0 | 0.115182  | 6.267266  | 0.391273  |
| 64 | 6  | 0 | -1.196659 | 5.830786  | 0.189335  |
| 65 | 6  | 0 | -1.439585 | 4.562287  | -0.335431 |
| 66 | 6  | 0 | -0.346285 | 3.753273  | -0.653677 |
| 67 | 6  | 0 | -2.561736 | -0.954717 | 2.103726  |
| 68 | 6  | 0 | -2.773759 | -2.083312 | 2.894218  |
| 69 | 6  | 0 | -1.845712 | -2.435653 | 3.879144  |
| 70 | 6  | 0 | -0.698048 | -1.663222 | 4.076576  |
| 71 | 6  | 0 | -0.467970 | -0.534278 | 3.289416  |
| 72 | 6  | 0 | -1.405098 | -0.200797 | 2.311634  |
| 73 | 9  | 0 | -1.435748 | -0.377373 | -0.756586 |
| 74 | 1  | 0 | 1.793138  | 3.503970  | -0.708618 |
| 75 | 1  | 0 | 2.211871  | 5.784699  | 0.230917  |
| 76 | 1  | 0 | 0.297013  | 7.256147  | 0.803569  |
| 77 | 1  | 0 | -2.032453 | 6.476745  | 0.442094  |
| 78 | 1  | 0 | -2.446522 | 4.195282  | -0.492329 |
| 79 | 1  | 0 | -3.285968 | -0.647389 | 1.360280  |
| 80 | 1  | 0 | -3.673344 | -2.674846 | 2.750630  |
| 81 | 1  | 0 | -2.024226 | -3.307826 | 4.502789  |
| 82 | 1  | 0 | 0.016139  | -1.935048 | 4.848821  |
| 83 | 1  | 0 | 0.416027  | 0.078333  | 3.414647  |
| 84 | 8  | 0 | -0.335902 | 2.222997  | 2.217637  |
| 85 | 8  | 0 | -2.573358 | 1.812413  | 1.083967  |
| 86 | 8  | 0 | -2.058015 | 2.085086  | -1.780149 |



|    |   |   |           |          |           |
|----|---|---|-----------|----------|-----------|
| 87 | 8 | 0 | 0.397290  | 1.863336 | -2.367945 |
| 88 | 6 | 0 | -8.268024 | 1.223770 | 0.806917  |
| 89 | 1 | 0 | -8.474370 | 1.553971 | -0.218698 |
| 90 | 1 | 0 | -7.510864 | 1.878115 | 1.255802  |
| 91 | 1 | 0 | -9.185481 | 1.271381 | 1.395362  |

-----

Thermal correction to Gibbs Free Energy= 0.594880  
Sum of electronic and thermal Free Energies= -3390.723094  
SCRF=-3393.08100902  
<S\*\*>2=0.368

## t-TS1

-----

| Center<br>Number | Atomic<br>Number | Atomic<br>Type | Coordinates (Angstroms) |           |          |
|------------------|------------------|----------------|-------------------------|-----------|----------|
|                  |                  |                | X                       | Y         | Z        |
| 1                | 6                | 0              | -3.109137               | 1.525506  | 5.336425 |
| 2                | 6                | 0              | -3.634122               | 1.561020  | 6.652231 |
| 3                | 6                | 0              | -3.760069               | 2.753202  | 7.337583 |
| 4                | 6                | 0              | -3.329808               | 3.964457  | 6.741441 |
| 5                | 6                | 0              | -2.785069               | 3.952738  | 5.442817 |
| 6                | 6                | 0              | -2.689191               | 2.753865  | 4.759338 |
| 7                | 6                | 0              | -2.988530               | 0.282549  | 4.512436 |
| 8                | 6                | 0              | -4.117800               | 0.249308  | 3.429879 |
| 9                | 6                | 0              | -1.743879               | -1.963033 | 4.755384 |
| 10               | 6                | 0              | -2.835346               | -1.031438 | 5.309505 |
| 11               | 6                | 0              | -3.918318               | -0.809359 | 2.344340 |
| 12               | 1                | 0              | -4.187877               | 2.795759  | 8.334221 |
| 13               | 8                | 0              | -3.476940               | 5.065814  | 7.503398 |
| 14               | 1                | 0              | -2.415701               | 4.855378  | 4.970776 |
| 15               | 1                | 0              | -2.245355               | 2.736590  | 3.770630 |
| 16               | 1                | 0              | -5.076096               | 0.097495  | 3.949658 |
| 17               | 1                | 0              | -4.160775               | 1.232012  | 2.951414 |
| 18               | 1                | 0              | -1.664647               | -2.870920 | 5.365324 |
| 19               | 1                | 0              | -1.947370               | -2.263401 | 3.723942 |
| 20               | 1                | 0              | -2.576924               | -0.808844 | 6.352022 |
| 21               | 1                | 0              | -3.794282               | -1.568508 | 5.339408 |
| 22               | 1                | 0              | -4.706925               | -0.720526 | 1.587942 |
| 23               | 1                | 0              | -2.955251               | -0.660287 | 1.845560 |
| 24               | 1                | 0              | -3.962026               | -1.828343 | 2.747273 |
| 25               | 1                | 0              | -3.975930               | 0.645022  | 7.123408 |
| 26               | 1                | 0              | -0.769474               | -1.461401 | 4.759941 |
| 27               | 1                | 0              | -2.066848               | 0.446934  | 3.874423 |

|    |    |   |           |           |           |
|----|----|---|-----------|-----------|-----------|
| 28 | 8  | 0 | 3.873958  | 0.275576  | -1.041473 |
| 29 | 8  | 0 | 2.611429  | 1.858677  | -0.025596 |
| 30 | 6  | 0 | 3.683205  | 1.439120  | -0.569054 |
| 31 | 6  | 0 | 4.834798  | 2.417211  | -0.632969 |
| 32 | 1  | 0 | 5.298018  | 2.482677  | 0.358338  |
| 33 | 1  | 0 | 5.582735  | 2.079174  | -1.352217 |
| 34 | 1  | 0 | 4.465535  | 3.411341  | -0.897464 |
| 35 | 45 | 0 | 2.343205  | -1.099548 | -0.917063 |
| 36 | 45 | 0 | 0.971602  | 0.599760  | 0.142442  |
| 37 | 8  | 0 | 0.417578  | 1.133359  | -1.798190 |
| 38 | 6  | 0 | 0.843470  | 0.474496  | -2.799855 |
| 39 | 8  | 0 | 1.647866  | -0.506636 | -2.754932 |
| 40 | 6  | 0 | 0.349502  | 0.911446  | -4.161190 |
| 41 | 1  | 0 | 0.698910  | 0.223451  | -4.932406 |
| 42 | 1  | 0 | -0.743941 | 0.952171  | -4.158746 |
| 43 | 1  | 0 | 0.721475  | 1.919258  | -4.376002 |
| 44 | 8  | 0 | 2.998780  | -1.677952 | 0.937383  |
| 45 | 8  | 0 | 1.698275  | -0.118878 | 1.939783  |
| 46 | 6  | 0 | 2.523203  | -1.086488 | 1.957651  |
| 47 | 6  | 0 | 2.953844  | -1.587240 | 3.317022  |
| 48 | 1  | 0 | 2.107017  | -2.096677 | 3.790630  |
| 49 | 1  | 0 | 3.787157  | -2.284949 | 3.219643  |
| 50 | 1  | 0 | 3.230004  | -0.741639 | 3.951797  |
| 51 | 8  | 0 | 0.776242  | -2.414451 | -0.774019 |
| 52 | 8  | 0 | -0.512850 | -0.839321 | 0.222155  |
| 53 | 6  | 0 | -0.310264 | -1.998703 | -0.252481 |
| 54 | 6  | 0 | -1.475277 | -2.960936 | -0.218031 |
| 55 | 1  | 0 | -2.035918 | -2.837841 | 0.711265  |
| 56 | 1  | 0 | -2.150755 | -2.723260 | -1.047849 |
| 57 | 1  | 0 | -1.125151 | -3.988966 | -0.327996 |
| 58 | 7  | 0 | -0.232520 | 2.273123  | 1.007115  |
| 59 | 16 | 0 | -1.886833 | 2.567322  | 0.413018  |
| 60 | 16 | 0 | 0.474447  | 3.622107  | 1.863260  |
| 61 | 6  | 0 | -1.160579 | 3.967060  | -1.858055 |
| 62 | 6  | 0 | -1.087023 | 5.121205  | -2.636666 |
| 63 | 6  | 0 | -1.571594 | 6.335642  | -2.143469 |
| 64 | 6  | 0 | -2.133336 | 6.404234  | -0.866595 |
| 65 | 6  | 0 | -2.212558 | 5.259602  | -0.073553 |
| 66 | 6  | 0 | -1.723381 | 4.055505  | -0.583593 |
| 67 | 6  | 0 | 1.374885  | 2.136329  | 4.032926  |
| 68 | 6  | 0 | 2.356797  | 1.810668  | 4.968549  |
| 69 | 6  | 0 | 3.666255  | 2.275978  | 4.814559  |
| 70 | 6  | 0 | 4.006414  | 3.066584  | 3.714207  |
| 71 | 6  | 0 | 3.035175  | 3.406716  | 2.771415  |

|    |   |   |           |          |           |
|----|---|---|-----------|----------|-----------|
| 72 | 6 | 0 | 1.732209  | 2.938043 | 2.947261  |
| 73 | 9 | 0 | -1.048663 | 1.042922 | 2.712958  |
| 74 | 1 | 0 | -0.780316 | 3.016182 | -2.211889 |
| 75 | 1 | 0 | -0.650958 | 5.073121 | -3.630763 |
| 76 | 1 | 0 | -1.510780 | 7.231089 | -2.756345 |
| 77 | 1 | 0 | -2.509449 | 7.349463 | -0.485555 |
| 78 | 1 | 0 | -2.637255 | 5.287343 | 0.922636  |
| 79 | 1 | 0 | 0.366941  | 1.746001 | 4.096012  |
| 80 | 1 | 0 | 2.096461  | 1.190585 | 5.822278  |
| 81 | 1 | 0 | 4.421995  | 2.023839 | 5.554151  |
| 82 | 1 | 0 | 5.023616  | 3.429807 | 3.595591  |
| 83 | 1 | 0 | 3.267298  | 4.032007 | 1.917879  |
| 84 | 8 | 0 | 1.146403  | 4.446944 | 0.851513  |
| 85 | 8 | 0 | -0.544269 | 4.249472 | 2.717615  |
| 86 | 8 | 0 | -2.808049 | 2.889119 | 1.503576  |
| 87 | 8 | 0 | -2.157241 | 1.436260 | -0.467752 |
| 88 | 6 | 0 | -3.074676 | 6.331246 | 6.977436  |
| 89 | 1 | 0 | -3.637533 | 6.575955 | 6.069798  |
| 90 | 1 | 0 | -2.001160 | 6.342557 | 6.758392  |
| 91 | 1 | 0 | -3.299371 | 7.058179 | 7.758526  |

---

Thermal correction to Gibbs Free Energy= 0.595778  
Sum of electronic and thermal Free Energies= -3390.716884  
SCRF= -3393.08016406  
<S\*\*>2=2.013

## s-IM1

---

| Center<br>Number | Atomic<br>Number | Atomic<br>Type | Coordinates (Angstroms) |           |           |
|------------------|------------------|----------------|-------------------------|-----------|-----------|
|                  |                  |                | X                       | Y         | Z         |
| 1                | 6                | 0              | 4.995778                | -0.269072 | 0.394868  |
| 2                | 6                | 0              | 3.756233                | -0.485231 | 1.079459  |
| 3                | 6                | 0              | 3.618686                | -1.438004 | 2.062096  |
| 4                | 6                | 0              | 4.735441                | -2.218408 | 2.425015  |
| 5                | 6                | 0              | 5.990502                | -2.022888 | 1.778534  |
| 6                | 6                | 0              | 6.114142                | -1.084114 | 0.791599  |
| 7                | 6                | 0              | 5.080463                | 0.696005  | -0.620208 |
| 8                | 6                | 0              | 3.907872                | 1.515071  | -1.048642 |
| 9                | 6                | 0              | 7.124255                | 2.151487  | -0.727690 |
| 10               | 6                | 0              | 6.354609                | 0.966944  | -1.366862 |
| 11               | 6                | 0              | 3.059524                | 0.731931  | -2.096479 |
| 12               | 1                | 0              | 2.646402                | -1.542878 | 2.527960  |
| 13               | 8                | 0              | 4.721390                | -3.162092 | 3.359982  |

|    |    |   |           |           |           |
|----|----|---|-----------|-----------|-----------|
| 14 | 1  | 0 | 6.826654  | -2.640451 | 2.088531  |
| 15 | 1  | 0 | 7.078442  | -0.958398 | 0.312965  |
| 16 | 1  | 0 | 3.257244  | 1.799488  | -0.215987 |
| 17 | 1  | 0 | 6.505753  | 3.053105  | -0.685467 |
| 18 | 1  | 0 | 7.444703  | 1.909603  | 0.290368  |
| 19 | 1  | 0 | 7.007048  | 0.091671  | -1.412412 |
| 20 | 1  | 0 | 6.095996  | 1.233471  | -2.398275 |
| 21 | 1  | 0 | 2.521385  | -0.098284 | -1.631399 |
| 22 | 1  | 0 | 2.321872  | 1.420425  | -2.514370 |
| 23 | 1  | 0 | 3.680294  | 0.347584  | -2.914486 |
| 24 | 1  | 0 | 2.877710  | 0.100561  | 0.848697  |
| 25 | 1  | 0 | 8.011978  | 2.373734  | -1.327598 |
| 26 | 6  | 0 | 3.499206  | -3.443402 | 4.066784  |
| 27 | 1  | 0 | 3.747350  | -4.250414 | 4.755078  |
| 28 | 1  | 0 | 2.718930  | -3.766391 | 3.371555  |
| 29 | 1  | 0 | 3.166019  | -2.562384 | 4.623055  |
| 30 | 1  | 0 | 4.269427  | 2.434770  | -1.520712 |
| 31 | 7  | 0 | -0.584555 | 1.345851  | 0.368347  |
| 32 | 16 | 0 | 0.490519  | 1.238609  | 1.613624  |
| 33 | 16 | 0 | -1.047322 | 2.891608  | -0.110005 |
| 34 | 6  | 0 | -1.372993 | 0.932755  | 3.618543  |
| 35 | 6  | 0 | -1.979026 | 1.275055  | 4.827457  |
| 36 | 6  | 0 | -1.537322 | 2.388451  | 5.548202  |
| 37 | 6  | 0 | -0.487300 | 3.168676  | 5.059788  |
| 38 | 6  | 0 | 0.124524  | 2.841502  | 3.848603  |
| 39 | 6  | 0 | -0.324980 | 1.725904  | 3.145449  |
| 40 | 6  | 0 | 0.068590  | 3.141368  | -2.635263 |
| 41 | 6  | 0 | 0.966114  | 3.676937  | -3.561632 |
| 42 | 6  | 0 | 1.971346  | 4.554375  | -3.142358 |
| 43 | 6  | 0 | 2.081220  | 4.896721  | -1.791593 |
| 44 | 6  | 0 | 1.187958  | 4.367073  | -0.856858 |
| 45 | 6  | 0 | 0.192178  | 3.490093  | -1.288636 |
| 46 | 1  | 0 | -1.702615 | 0.071933  | 3.044578  |
| 47 | 1  | 0 | -2.800274 | 0.672356  | 5.206543  |
| 48 | 1  | 0 | -2.015803 | 2.650571  | 6.488429  |
| 49 | 1  | 0 | -0.149174 | 4.038921  | 5.616068  |
| 50 | 1  | 0 | 0.930750  | 3.439829  | 3.441017  |
| 51 | 1  | 0 | -0.719860 | 2.460322  | -2.934254 |
| 52 | 1  | 0 | 0.871608  | 3.420732  | -4.614061 |
| 53 | 1  | 0 | 2.657455  | 4.981884  | -3.869655 |
| 54 | 1  | 0 | 2.850630  | 5.592792  | -1.466360 |
| 55 | 1  | 0 | 1.244912  | 4.631694  | 0.192175  |
| 56 | 8  | 0 | -2.283621 | 2.752718  | -0.878295 |
| 57 | 8  | 0 | 1.656667  | 2.144115  | 1.430349  |

|    |    |   |           |           |           |
|----|----|---|-----------|-----------|-----------|
| 58 | 8  | 0 | 0.817684  | -0.193262 | 1.774487  |
| 59 | 45 | 0 | -2.592378 | -2.522976 | -1.535514 |
| 60 | 45 | 0 | -1.539223 | -0.562205 | -0.545349 |
| 61 | 8  | 0 | -4.421622 | -1.604970 | -1.282763 |
| 62 | 8  | 0 | -3.446301 | 0.177850  | -0.270391 |
| 63 | 6  | 0 | -4.447806 | -0.472812 | -0.699288 |
| 64 | 6  | 0 | -5.806312 | 0.153750  | -0.464930 |
| 65 | 1  | 0 | -6.143895 | -0.094347 | 0.548405  |
| 66 | 1  | 0 | -5.731442 | 1.240829  | -0.540239 |
| 67 | 1  | 0 | -6.534108 | -0.237044 | -1.179138 |
| 68 | 8  | 0 | -1.777518 | -1.517326 | 1.298698  |
| 69 | 6  | 0 | -2.322031 | -2.664767 | 1.344141  |
| 70 | 8  | 0 | -2.739550 | -3.344953 | 0.356201  |
| 71 | 6  | 0 | -2.520152 | -3.269692 | 2.720788  |
| 72 | 1  | 0 | -3.506591 | -2.976176 | 3.099268  |
| 73 | 1  | 0 | -2.490450 | -4.360183 | 2.662877  |
| 74 | 1  | 0 | -1.761771 | -2.898417 | 3.413757  |
| 75 | 8  | 0 | -2.413612 | -1.623827 | -3.386491 |
| 76 | 8  | 0 | -1.424206 | 0.207563  | -2.481548 |
| 77 | 6  | 0 | -1.892842 | -0.468126 | -3.452037 |
| 78 | 6  | 0 | -1.837684 | 0.185063  | -4.819163 |
| 79 | 1  | 0 | -0.847211 | 0.617507  | -4.989467 |
| 80 | 1  | 0 | -2.072492 | -0.539629 | -5.600603 |
| 81 | 1  | 0 | -2.568126 | 1.001332  | -4.853388 |
| 82 | 8  | 0 | -0.707976 | -3.360280 | -1.748166 |
| 83 | 8  | 0 | 0.308517  | -1.508088 | -0.909134 |
| 84 | 6  | 0 | 0.306650  | -2.675547 | -1.410125 |
| 85 | 6  | 0 | 1.662864  | -3.313220 | -1.658702 |
| 86 | 1  | 0 | 2.377549  | -2.993720 | -0.895966 |
| 87 | 1  | 0 | 1.574678  | -4.401667 | -1.669091 |
| 88 | 1  | 0 | 2.037190  | -2.989857 | -2.637515 |
| 89 | 8  | 0 | -0.991379 | 3.817280  | 1.033971  |

-----  
Thermal correction to Gibbs Free Energy= 0.587645  
Sum of electronic and thermal Free Energies= -3290.370457  
SCRF= -3292.73224494  
<S\*\*>2=0.000

## t-IM1

-----  
Center Atomic Atomic Coordinates (Angstroms)  
Number Number Type X Y Z  
-----

|    |    |   |           |           |           |
|----|----|---|-----------|-----------|-----------|
| 1  | 6  | 0 | -3.836532 | 1.771164  | 5.183080  |
| 2  | 6  | 0 | -4.033549 | 2.001239  | 6.575860  |
| 3  | 6  | 0 | -3.954608 | 3.268480  | 7.145580  |
| 4  | 6  | 0 | -3.677787 | 4.383924  | 6.342766  |
| 5  | 6  | 0 | -3.478283 | 4.196546  | 4.962064  |
| 6  | 6  | 0 | -3.552049 | 2.936213  | 4.399593  |
| 7  | 6  | 0 | -3.916232 | 0.468526  | 4.605103  |
| 8  | 6  | 0 | -3.633705 | 0.220749  | 3.143285  |
| 9  | 6  | 0 | -3.073813 | -1.435119 | 6.082190  |
| 10 | 6  | 0 | -4.288596 | -0.743845 | 5.424057  |
| 11 | 6  | 0 | -4.889390 | 0.330627  | 2.249750  |
| 12 | 1  | 0 | -4.112318 | 3.376369  | 8.213355  |
| 13 | 8  | 0 | -3.579921 | 5.670278  | 6.792841  |
| 14 | 1  | 0 | -3.265900 | 5.067808  | 4.349361  |
| 15 | 1  | 0 | -3.387657 | 2.841580  | 3.331979  |
| 16 | 1  | 0 | -2.867298 | 0.901271  | 2.758431  |
| 17 | 1  | 0 | -3.220105 | -0.792159 | 3.032495  |
| 18 | 1  | 0 | -3.381545 | -2.333774 | 6.630844  |
| 19 | 1  | 0 | -2.337600 | -1.735057 | 5.327511  |
| 20 | 1  | 0 | -5.020048 | -0.491153 | 6.201813  |
| 21 | 1  | 0 | -4.787686 | -1.471834 | 4.769666  |
| 22 | 1  | 0 | -5.316385 | 1.338250  | 2.297740  |
| 23 | 1  | 0 | -4.638145 | 0.117684  | 1.204166  |
| 24 | 1  | 0 | -5.666667 | -0.375776 | 2.565649  |
| 25 | 1  | 0 | -4.247173 | 1.164338  | 7.232337  |
| 26 | 1  | 0 | -2.571016 | -0.760919 | 6.784354  |
| 27 | 8  | 0 | 4.494445  | -0.003673 | -1.949030 |
| 28 | 8  | 0 | 3.350011  | 1.792499  | -1.190706 |
| 29 | 6  | 0 | 4.342927  | 1.246443  | -1.769718 |
| 30 | 6  | 0 | 5.408137  | 2.176034  | -2.298646 |
| 31 | 1  | 0 | 5.027392  | 2.682858  | -3.192507 |
| 32 | 1  | 0 | 5.630353  | 2.942810  | -1.552144 |
| 33 | 1  | 0 | 6.307334  | 1.615330  | -2.558974 |
| 34 | 45 | 0 | 3.017572  | -1.269153 | -1.289558 |
| 35 | 45 | 0 | 1.846848  | 0.643483  | -0.376488 |
| 36 | 8  | 0 | 0.910960  | 0.775749  | -2.227744 |
| 37 | 6  | 0 | 1.164456  | -0.074738 | -3.142460 |
| 38 | 8  | 0 | 1.996608  | -1.029593 | -3.054350 |
| 39 | 6  | 0 | 0.410037  | 0.087140  | -4.441496 |
| 40 | 1  | 0 | 0.726971  | 1.014278  | -4.931624 |
| 41 | 1  | 0 | 0.605311  | -0.758065 | -5.102963 |
| 42 | 1  | 0 | -0.660806 | 0.169154  | -4.233834 |
| 43 | 8  | 0 | 4.000232  | -1.480198 | 0.500350  |
| 44 | 8  | 0 | 2.933718  | 0.324681  | 1.354352  |

|    |    |   |           |           |           |
|----|----|---|-----------|-----------|-----------|
| 45 | 6  | 0 | 3.755707  | -0.646947 | 1.426175  |
| 46 | 6  | 0 | 4.517842  | -0.799562 | 2.721639  |
| 47 | 1  | 0 | 4.941056  | -1.802864 | 2.793387  |
| 48 | 1  | 0 | 5.334592  | -0.068559 | 2.740792  |
| 49 | 1  | 0 | 3.860561  | -0.594962 | 3.569962  |
| 50 | 8  | 0 | 1.513444  | -2.486594 | -0.604646 |
| 51 | 8  | 0 | 0.469470  | -0.716396 | 0.338370  |
| 52 | 6  | 0 | 0.572965  | -1.955181 | 0.066999  |
| 53 | 6  | 0 | -0.512030 | -2.854485 | 0.607927  |
| 54 | 1  | 0 | -1.490388 | -2.416883 | 0.391777  |
| 55 | 1  | 0 | -0.431463 | -3.852379 | 0.174149  |
| 56 | 1  | 0 | -0.411764 | -2.920900 | 1.696888  |
| 57 | 7  | 0 | 0.808711  | 2.265745  | 0.484197  |
| 58 | 16 | 0 | -0.882533 | 2.522087  | 0.154582  |
| 59 | 16 | 0 | 1.597373  | 3.400402  | 1.555027  |
| 60 | 6  | 0 | -0.555782 | 3.773022  | -2.274361 |
| 61 | 6  | 0 | -0.654844 | 4.862306  | -3.139160 |
| 62 | 6  | 0 | -1.137724 | 6.088328  | -2.673137 |
| 63 | 6  | 0 | -1.521525 | 6.234729  | -1.337529 |
| 64 | 6  | 0 | -1.419388 | 5.158794  | -0.456878 |
| 65 | 6  | 0 | -0.938422 | 3.941059  | -0.940523 |
| 66 | 6  | 0 | 0.231805  | 2.875210  | 3.917855  |
| 67 | 6  | 0 | 0.169561  | 2.439658  | 5.241526  |
| 68 | 6  | 0 | 1.302495  | 1.903084  | 5.858753  |
| 69 | 6  | 0 | 2.506784  | 1.800773  | 5.156946  |
| 70 | 6  | 0 | 2.580951  | 2.219581  | 3.828850  |
| 71 | 6  | 0 | 1.437006  | 2.745518  | 3.221538  |
| 72 | 1  | 0 | -0.189792 | 2.810515  | -2.614225 |
| 73 | 1  | 0 | -0.359740 | 4.752867  | -4.179015 |
| 74 | 1  | 0 | -1.215102 | 6.932505  | -3.353016 |
| 75 | 1  | 0 | -1.895943 | 7.188864  | -0.978310 |
| 76 | 1  | 0 | -1.696258 | 5.251890  | 0.585768  |
| 77 | 1  | 0 | -0.638120 | 3.299993  | 3.434841  |
| 78 | 1  | 0 | -0.765926 | 2.528593  | 5.785026  |
| 79 | 1  | 0 | 1.249605  | 1.572219  | 6.892635  |
| 80 | 1  | 0 | 3.392009  | 1.403496  | 5.646506  |
| 81 | 1  | 0 | 3.502762  | 2.160313  | 3.265004  |
| 82 | 8  | 0 | 3.013488  | 3.357360  | 1.196890  |
| 83 | 8  | 0 | 0.853504  | 4.661435  | 1.487703  |
| 84 | 8  | 0 | -1.573572 | 2.872104  | 1.403623  |
| 85 | 8  | 0 | -1.316646 | 1.350000  | -0.601105 |
| 86 | 6  | 0 | -3.758084 | 5.909641  | 8.177518  |
| 87 | 1  | 0 | -3.633578 | 6.985461  | 8.315962  |
| 88 | 1  | 0 | -3.008439 | 5.378399  | 8.779887  |

89            1            0            -4.761421    5.615305    8.514474

-----  
Thermal correction to Gibbs Free Energy=            0.580333  
Sum of electronic and thermal Free Energies=        -3290.348230  
SCRF= -3292.68202376  
<S\*\*>2=2.031

## s-TS2

-----

| Center<br>Number | Atomic<br>Number | Atomic<br>Type | Coordinates (Angstroms) |           |           |
|------------------|------------------|----------------|-------------------------|-----------|-----------|
|                  |                  |                | X                       | Y         | Z         |
| 1                | 6                | 0              | 4.418547                | -0.642758 | 0.101152  |
| 2                | 6                | 0              | 3.878732                | -0.952463 | 1.365691  |
| 3                | 6                | 0              | 4.275372                | -2.083275 | 2.072880  |
| 4                | 6                | 0              | 5.239682                | -2.947646 | 1.532068  |
| 5                | 6                | 0              | 5.777802                | -2.666450 | 0.266752  |
| 6                | 6                | 0              | 5.366389                | -1.542513 | -0.433443 |
| 7                | 6                | 0              | 4.020472                | 0.576897  | -0.633286 |
| 8                | 6                | 0              | 3.176591                | 1.581232  | -0.034462 |
| 9                | 6                | 0              | 6.113223                | 1.552383  | -1.664917 |
| 10               | 6                | 0              | 4.719911                | 0.945155  | -1.928827 |
| 11               | 6                | 0              | 2.130643                | 0.733967  | -0.816037 |
| 12               | 1                | 0              | 3.824958                | -2.280198 | 3.038641  |
| 13               | 8                | 0              | 5.705891                | -4.067328 | 2.141198  |
| 14               | 1                | 0              | 6.516420                | -3.345799 | -0.146481 |
| 15               | 1                | 0              | 5.803006                | -1.362793 | -1.409595 |
| 16               | 1                | 0              | 3.020608                | 1.580205  | 1.038865  |
| 17               | 1                | 0              | 6.034209                | 2.448022  | -1.039247 |
| 18               | 1                | 0              | 6.778468                | 0.847334  | -1.157848 |
| 19               | 1                | 0              | 4.805127                | 0.079936  | -2.595001 |
| 20               | 1                | 0              | 4.112629                | 1.687365  | -2.456166 |
| 21               | 1                | 0              | 1.921862                | -0.289696 | -0.518812 |
| 22               | 1                | 0              | 1.009580                | 1.229012  | -0.301204 |
| 23               | 1                | 0              | 2.028904                | 0.923617  | -1.880523 |
| 24               | 1                | 0              | 3.103357                | -0.331982 | 1.803503  |
| 25               | 1                | 0              | 6.580707                | 1.841675  | -2.612403 |
| 26               | 6                | 0              | 5.193953                | -4.406741 | 3.424080  |
| 27               | 1                | 0              | 5.707668                | -5.324167 | 3.715363  |
| 28               | 1                | 0              | 4.112704                | -4.590307 | 3.388447  |
| 29               | 1                | 0              | 5.404998                | -3.621132 | 4.160394  |
| 30               | 1                | 0              | 3.249780                | 2.590313  | -0.434823 |



|    |    |   |           |           |           |
|----|----|---|-----------|-----------|-----------|
| 31 | 7  | 0 | -0.206235 | 1.645662  | 0.289499  |
| 32 | 16 | 0 | 0.269019  | 1.914440  | 1.926147  |
| 33 | 16 | 0 | -0.862617 | 3.012217  | -0.552849 |
| 34 | 6  | 0 | -1.952297 | 1.115791  | 3.360165  |
| 35 | 6  | 0 | -3.029833 | 1.349550  | 4.216250  |
| 36 | 6  | 0 | -3.314660 | 2.643875  | 4.656037  |
| 37 | 6  | 0 | -2.520035 | 3.716870  | 4.244404  |
| 38 | 6  | 0 | -1.443036 | 3.502271  | 3.385989  |
| 39 | 6  | 0 | -1.178490 | 2.201962  | 2.951375  |
| 40 | 6  | 0 | 0.894868  | 3.535931  | -2.616218 |
| 41 | 6  | 0 | 1.960316  | 4.205219  | -3.221944 |
| 42 | 6  | 0 | 2.663132  | 5.186331  | -2.516180 |
| 43 | 6  | 0 | 2.299135  | 5.504973  | -1.204839 |
| 44 | 6  | 0 | 1.236809  | 4.841699  | -0.587400 |
| 45 | 6  | 0 | 0.551941  | 3.854841  | -1.299940 |
| 46 | 1  | 0 | -1.720190 | 0.117223  | 3.009818  |
| 47 | 1  | 0 | -3.645048 | 0.515340  | 4.542765  |
| 48 | 1  | 0 | -4.154669 | 2.817273  | 5.323606  |
| 49 | 1  | 0 | -2.739158 | 4.723435  | 4.589034  |
| 50 | 1  | 0 | -0.818307 | 4.320367  | 3.051819  |
| 51 | 1  | 0 | 0.319958  | 2.786773  | -3.149965 |
| 52 | 1  | 0 | 2.229667  | 3.972845  | -4.248829 |
| 53 | 1  | 0 | 3.486581  | 5.711744  | -2.992706 |
| 54 | 1  | 0 | 2.837777  | 6.276686  | -0.661983 |
| 55 | 1  | 0 | 0.945025  | 5.073980  | 0.429138  |
| 56 | 8  | 0 | -1.652794 | 2.495580  | -1.666990 |
| 57 | 8  | 0 | 1.112592  | 3.121054  | 2.013514  |
| 58 | 8  | 0 | 0.862257  | 0.622111  | 2.307889  |
| 59 | 45 | 0 | -2.417736 | -2.618732 | -1.226170 |
| 60 | 45 | 0 | -1.275767 | -0.679556 | -0.338856 |
| 61 | 8  | 0 | -4.177720 | -1.547905 | -1.150832 |
| 62 | 8  | 0 | -3.099642 | 0.270857  | -0.330764 |
| 63 | 6  | 0 | -4.135521 | -0.344817 | -0.734419 |
| 64 | 6  | 0 | -5.432124 | 0.432619  | -0.704413 |
| 65 | 1  | 0 | -5.695456 | 0.657405  | 0.334757  |
| 66 | 1  | 0 | -5.291735 | 1.387204  | -1.219867 |
| 67 | 1  | 0 | -6.235543 | -0.139105 | -1.171561 |
| 68 | 8  | 0 | -1.708617 | -1.443080 | 1.551845  |
| 69 | 6  | 0 | -2.309227 | -2.560448 | 1.660074  |
| 70 | 8  | 0 | -2.716366 | -3.286645 | 0.701667  |
| 71 | 6  | 0 | -2.585055 | -3.053100 | 3.065006  |
| 72 | 1  | 0 | -3.467823 | -2.534281 | 3.457367  |
| 73 | 1  | 0 | -2.785502 | -4.125994 | 3.060256  |
| 74 | 1  | 0 | -1.739802 | -2.822784 | 3.718445  |

|    |   |   |           |           |           |
|----|---|---|-----------|-----------|-----------|
| 75 | 8 | 0 | -2.086787 | -1.884673 | -3.122404 |
| 76 | 8 | 0 | -0.855971 | -0.165160 | -2.306322 |
| 77 | 6 | 0 | -1.377783 | -0.837199 | -3.250914 |
| 78 | 6 | 0 | -1.138177 | -0.327159 | -4.655572 |
| 79 | 1 | 0 | -0.065790 | -0.180865 | -4.819127 |
| 80 | 1 | 0 | -1.536517 | -1.024866 | -5.393713 |
| 81 | 1 | 0 | -1.626626 | 0.647002  | -4.765809 |
| 82 | 8 | 0 | -0.607623 | -3.614299 | -1.267648 |
| 83 | 8 | 0 | 0.468531  | -1.839530 | -0.355150 |
| 84 | 6 | 0 | 0.424417  | -3.025219 | -0.820106 |
| 85 | 6 | 0 | 1.730590  | -3.789214 | -0.864383 |
| 86 | 1 | 0 | 2.332617  | -3.560265 | 0.018224  |
| 87 | 1 | 0 | 1.542154  | -4.861913 | -0.936809 |
| 88 | 1 | 0 | 2.299217  | -3.473515 | -1.747091 |
| 89 | 8 | 0 | -1.458868 | 3.931794  | 0.422952  |

-----

Thermal correction to Gibbs Free Energy= 0.583812  
Sum of electronic and thermal Free Energies= -3290.340686  
SCRF= -3292.68408655  
<S\*\*>2=0.000

## t-TS2

-----

| Center<br>Number | Atomic<br>Number | Atomic<br>Type | Coordinates (Angstroms) |           |           |
|------------------|------------------|----------------|-------------------------|-----------|-----------|
|                  |                  |                | X                       | Y         | Z         |
| 1                | 6                | 0              | 4.608439                | -0.928988 | -0.133967 |
| 2                | 6                | 0              | 4.697443                | -0.656442 | 1.248247  |
| 3                | 6                | 0              | 5.341093                | -1.524705 | 2.122672  |
| 4                | 6                | 0              | 5.928102                | -2.703834 | 1.637571  |
| 5                | 6                | 0              | 5.841146                | -3.000574 | 0.267605  |
| 6                | 6                | 0              | 5.187533                | -2.134551 | -0.593152 |
| 7                | 6                | 0              | 3.955131                | 0.004659  | -1.064170 |
| 8                | 6                | 0              | 3.411520                | 1.264721  | -0.625637 |
| 9                | 6                | 0              | 5.388374                | 0.152588  | -3.139594 |
| 10               | 6                | 0              | 4.014022                | -0.241714 | -2.558597 |
| 11               | 6                | 0              | 2.102123                | 0.424172  | -0.520673 |
| 12               | 1                | 0              | 5.375658                | -1.275223 | 3.176640  |
| 13               | 8                | 0              | 6.584362                | -3.611934 | 2.399749  |
| 14               | 1                | 0              | 6.291572                | -3.919070 | -0.094493 |
| 15               | 1                | 0              | 5.137329                | -2.401078 | -1.642908 |
| 16               | 1                | 0              | 3.706010                | 1.675445  | 0.336093  |
| 17               | 1                | 0              | 5.606630                | 1.208264  | -2.945329 |

|    |    |   |           |           |           |
|----|----|---|-----------|-----------|-----------|
| 18 | 1  | 0 | 6.198968  | -0.442411 | -2.708579 |
| 19 | 1  | 0 | 3.791034  | -1.286434 | -2.799584 |
| 20 | 1  | 0 | 3.240927  | 0.360808  | -3.045057 |
| 21 | 1  | 0 | 2.063275  | -0.373737 | 0.213552  |
| 22 | 1  | 0 | 1.412358  | 1.320033  | 0.117109  |
| 23 | 1  | 0 | 1.555427  | 0.205882  | -1.434806 |
| 24 | 1  | 0 | 4.226814  | 0.225996  | 1.669627  |
| 25 | 1  | 0 | 5.391704  | 0.000778  | -4.224255 |
| 26 | 6  | 0 | 6.707910  | -3.369103 | 3.796762  |
| 27 | 1  | 0 | 7.269040  | -4.215313 | 4.195714  |
| 28 | 1  | 0 | 5.725622  | -3.321092 | 4.282814  |
| 29 | 1  | 0 | 7.257891  | -2.440640 | 3.993888  |
| 30 | 1  | 0 | 3.309148  | 2.037141  | -1.387512 |
| 31 | 7  | 0 | 0.728025  | 2.245784  | 0.896536  |
| 32 | 16 | 0 | 1.328094  | 2.536932  | 2.415996  |
| 33 | 16 | 0 | -0.599496 | 3.007228  | 0.251461  |
| 34 | 6  | 0 | -0.454934 | 0.597583  | 3.290318  |
| 35 | 6  | 0 | -1.309745 | 0.037482  | 4.239753  |
| 36 | 6  | 0 | -1.548404 | 0.694181  | 5.450422  |
| 37 | 6  | 0 | -0.937962 | 1.921766  | 5.714097  |
| 38 | 6  | 0 | -0.083893 | 2.496284  | 4.771279  |
| 39 | 6  | 0 | 0.150281  | 1.824177  | 3.571477  |
| 40 | 6  | 0 | 0.120011  | 4.489282  | -1.968642 |
| 41 | 6  | 0 | 0.575680  | 5.643771  | -2.608411 |
| 42 | 6  | 0 | 0.907772  | 6.775085  | -1.860308 |
| 43 | 6  | 0 | 0.782036  | 6.759040  | -0.468276 |
| 44 | 6  | 0 | 0.324512  | 5.614828  | 0.184901  |
| 45 | 6  | 0 | 0.003257  | 4.488501  | -0.577472 |
| 46 | 1  | 0 | -0.287606 | 0.102714  | 2.339038  |
| 47 | 1  | 0 | -1.797333 | -0.910289 | 4.027670  |
| 48 | 1  | 0 | -2.217384 | 0.252564  | 6.184306  |
| 49 | 1  | 0 | -1.131790 | 2.438768  | 6.649792  |
| 50 | 1  | 0 | 0.385937  | 3.457396  | 4.948519  |
| 51 | 1  | 0 | -0.161344 | 3.605223  | -2.530313 |
| 52 | 1  | 0 | 0.663506  | 5.659579  | -3.691400 |
| 53 | 1  | 0 | 1.260935  | 7.672207  | -2.361902 |
| 54 | 1  | 0 | 1.038111  | 7.640674  | 0.112515  |
| 55 | 1  | 0 | 0.232080  | 5.586355  | 1.264351  |
| 56 | 8  | 0 | -1.041575 | 2.098690  | -0.829955 |
| 57 | 8  | 0 | 1.436509  | 3.970743  | 2.721924  |
| 58 | 8  | 0 | 2.556991  | 1.717811  | 2.462533  |
| 59 | 45 | 0 | -2.832426 | -2.581081 | -1.391147 |
| 60 | 45 | 0 | -1.869378 | -0.344649 | -0.987579 |
| 61 | 8  | 0 | -4.178413 | -1.705877 | -2.685942 |

|    |   |   |           |           |           |
|----|---|---|-----------|-----------|-----------|
| 62 | 8 | 0 | -3.287102 | 0.343067  | -2.354544 |
| 63 | 6 | 0 | -4.125505 | -0.449567 | -2.885502 |
| 64 | 6 | 0 | -5.159325 | 0.153894  | -3.808837 |
| 65 | 1 | 0 | -5.959333 | 0.593963  | -3.202210 |
| 66 | 1 | 0 | -4.710947 | 0.954679  | -4.401757 |
| 67 | 1 | 0 | -5.589232 | -0.612411 | -4.456294 |
| 68 | 8 | 0 | -3.244846 | -0.151356 | 0.548231  |
| 69 | 6 | 0 | -4.052615 | -1.102142 | 0.799804  |
| 70 | 8 | 0 | -4.123569 | -2.219699 | 0.194292  |
| 71 | 6 | 0 | -5.042652 | -0.859394 | 1.919245  |
| 72 | 1 | 0 | -5.872037 | -0.256114 | 1.532139  |
| 73 | 1 | 0 | -5.440261 | -1.805140 | 2.292119  |
| 74 | 1 | 0 | -4.566027 | -0.292116 | 2.722370  |
| 75 | 8 | 0 | -1.468677 | -2.781603 | -2.955353 |
| 76 | 8 | 0 | -0.548794 | -0.736535 | -2.567334 |
| 77 | 6 | 0 | -0.654173 | -1.838332 | -3.199565 |
| 78 | 6 | 0 | 0.265371  | -2.030086 | -4.389414 |
| 79 | 1 | 0 | 1.200666  | -1.484761 | -4.244182 |
| 80 | 1 | 0 | 0.458822  | -3.092097 | -4.553800 |
| 81 | 1 | 0 | -0.227475 | -1.628629 | -5.282788 |
| 82 | 8 | 0 | -1.433206 | -3.347353 | -0.068910 |
| 83 | 8 | 0 | -0.549442 | -1.309388 | 0.341224  |
| 84 | 6 | 0 | -0.612020 | -2.571338 | 0.508376  |
| 85 | 6 | 0 | 0.390851  | -3.190988 | 1.457246  |
| 86 | 1 | 0 | 0.446599  | -2.604443 | 2.378773  |
| 87 | 1 | 0 | 0.120744  | -4.224292 | 1.680080  |
| 88 | 1 | 0 | 1.383924  | -3.171244 | 0.993744  |
| 89 | 8 | 0 | -1.534745 | 3.421489  | 1.299802  |

-----  
Thermal correction to Gibbs Free Energy= 0.574519  
Sum of electronic and thermal Free Energies= -3290.321875  
SCRF= -3292.66171135  
<S\*\*>2=2.013

## s-IM2

-----

| Center<br>Number | Atomic<br>Number | Atomic<br>Type | Coordinates (Angstroms) |          |          |
|------------------|------------------|----------------|-------------------------|----------|----------|
|                  |                  |                | X                       | Y        | Z        |
| 1                | 6                | 0              | -2.195486               | 2.124374 | 3.242738 |
| 2                | 6                | 0              | -1.208782               | 1.654275 | 4.117236 |
| 3                | 6                | 0              | -1.129308               | 2.099478 | 5.439900 |
| 4                | 6                | 0              | -2.054909               | 3.036862 | 5.914002 |

|    |    |   |           |           |           |
|----|----|---|-----------|-----------|-----------|
| 5  | 6  | 0 | -3.050409 | 3.516879  | 5.052213  |
| 6  | 6  | 0 | -3.114520 | 3.062587  | 3.739265  |
| 7  | 6  | 0 | -2.287272 | 1.593545  | 1.833727  |
| 8  | 6  | 0 | -2.507481 | 2.576500  | 0.706645  |
| 9  | 6  | 0 | -4.412531 | 0.172157  | 2.110409  |
| 10 | 6  | 0 | -2.937106 | 0.212552  | 1.695975  |
| 11 | 6  | 0 | -1.153273 | 1.918225  | 0.881266  |
| 12 | 1  | 0 | -0.345377 | 1.714976  | 6.083307  |
| 13 | 8  | 0 | -2.071676 | 3.542649  | 7.184825  |
| 14 | 1  | 0 | -3.760801 | 4.244224  | 5.433427  |
| 15 | 1  | 0 | -3.892906 | 3.444559  | 3.083628  |
| 16 | 1  | 0 | -2.580385 | 3.634929  | 0.941119  |
| 17 | 1  | 0 | -4.541406 | 0.454438  | 3.161059  |
| 18 | 1  | 0 | -5.013419 | 0.861327  | 1.504425  |
| 19 | 1  | 0 | -2.840460 | -0.118371 | 0.653767  |
| 20 | 1  | 0 | -2.361599 | -0.504699 | 2.295311  |
| 21 | 1  | 0 | -0.329177 | 2.528785  | 1.237658  |
| 22 | 1  | 0 | -0.881218 | 1.181718  | 0.118892  |
| 23 | 1  | 0 | -0.486566 | 0.925680  | 3.758077  |
| 24 | 1  | 0 | -4.825472 | -0.835000 | 1.980119  |
| 25 | 6  | 0 | -1.090458 | 3.086475  | 8.098622  |
| 26 | 1  | 0 | -1.286439 | 3.609392  | 9.036937  |
| 27 | 1  | 0 | -0.074167 | 3.326117  | 7.757048  |
| 28 | 1  | 0 | -1.164552 | 2.003228  | 8.266613  |
| 29 | 45 | 0 | 2.566041  | -2.100966 | 0.430107  |
| 30 | 45 | 0 | 0.885032  | -0.402103 | 0.548075  |
| 31 | 1  | 0 | -3.123014 | 2.261645  | -0.132519 |
| 32 | 8  | 0 | 3.950942  | -0.688116 | 1.021266  |
| 33 | 8  | 0 | 2.357482  | 0.920597  | 1.144198  |
| 34 | 6  | 0 | 3.554330  | 0.499097  | 1.252707  |
| 35 | 6  | 0 | 4.590312  | 1.492324  | 1.728344  |
| 36 | 1  | 0 | 5.582163  | 1.207333  | 1.372005  |
| 37 | 1  | 0 | 4.332428  | 2.498767  | 1.391643  |
| 38 | 1  | 0 | 4.603290  | 1.492529  | 2.824713  |
| 39 | 8  | 0 | 1.291792  | 0.042438  | -1.427049 |
| 40 | 6  | 0 | 2.188191  | -0.626950 | -2.036178 |
| 41 | 8  | 0 | 2.875456  | -1.576562 | -1.540445 |
| 42 | 6  | 0 | 2.482079  | -0.236448 | -3.466607 |
| 43 | 1  | 0 | 3.241512  | 0.554429  | -3.467948 |
| 44 | 1  | 0 | 2.874818  | -1.091413 | -4.020536 |
| 45 | 1  | 0 | 1.581956  | 0.154768  | -3.945485 |
| 46 | 8  | 0 | 2.174888  | -2.548720 | 2.407874  |
| 47 | 8  | 0 | 0.573634  | -0.948434 | 2.522924  |
| 48 | 6  | 0 | 1.275362  | -1.888955 | 3.019228  |

|    |   |   |           |           |           |
|----|---|---|-----------|-----------|-----------|
| 49 | 6 | 0 | 1.035157  | -2.244572 | 4.469294  |
| 50 | 1 | 0 | 0.960895  | -3.330371 | 4.575839  |
| 51 | 1 | 0 | 1.892629  | -1.913082 | 5.065667  |
| 52 | 1 | 0 | 0.128778  | -1.763174 | 4.839698  |
| 53 | 8 | 0 | 1.101526  | -3.431572 | -0.160202 |
| 54 | 8 | 0 | -0.490149 | -1.819422 | -0.064481 |
| 55 | 6 | 0 | -0.093113 | -3.010417 | -0.280627 |
| 56 | 6 | 0 | -1.144574 | -4.017342 | -0.688562 |
| 57 | 1 | 0 | -0.681819 | -4.875509 | -1.179030 |
| 58 | 1 | 0 | -1.669503 | -4.365437 | 0.208747  |
| 59 | 1 | 0 | -1.879875 | -3.547434 | -1.346110 |

---

Thermal correction to Gibbs Free Energy= 0.389960  
 Sum of electronic and thermal Free Energies= -1674.818828  
 SCRF= -1677.04360370  
 <S\*\*>2=0.000

## t-IM2

---

| Center<br>Number | Atomic<br>Number | Atomic<br>Type | Coordinates (Angstroms) |           |          |
|------------------|------------------|----------------|-------------------------|-----------|----------|
|                  |                  |                | X                       | Y         | Z        |
| 1                | 6                | 0              | -2.345022               | 2.167062  | 3.321783 |
| 2                | 6                | 0              | -1.401589               | 1.428087  | 4.044925 |
| 3                | 6                | 0              | -1.157500               | 1.676292  | 5.399013 |
| 4                | 6                | 0              | -1.868084               | 2.685455  | 6.059572 |
| 5                | 6                | 0              | -2.816323               | 3.435392  | 5.350740 |
| 6                | 6                | 0              | -3.046858               | 3.173959  | 4.004270 |
| 7                | 6                | 0              | -2.621434               | 1.848090  | 1.873692 |
| 8                | 6                | 0              | -2.707168               | 2.989408  | 0.883889 |
| 9                | 6                | 0              | -4.969328               | 0.834490  | 2.160164 |
| 10               | 6                | 0              | -3.541067               | 0.645254  | 1.636081 |
| 11               | 6                | 0              | -1.507421               | 2.068151  | 0.870368 |
| 12               | 1                | 0              | -0.413172               | 1.084660  | 5.921027 |
| 13               | 8                | 0              | -1.709789               | 3.016550  | 7.377868 |
| 14               | 1                | 0              | -3.358169               | 4.216611  | 5.875329 |
| 15               | 1                | 0              | -3.784304               | 3.765822  | 3.467906 |
| 16               | 1                | 0              | -2.559561               | 4.002885  | 1.246964 |
| 17               | 1                | 0              | -4.975876               | 1.006955  | 3.241815 |
| 18               | 1                | 0              | -5.454390               | 1.694395  | 1.682308 |
| 19               | 1                | 0              | -3.574509               | 0.439039  | 0.557253 |
| 20               | 1                | 0              | -3.091943               | -0.241140 | 2.105317 |
| 21               | 1                | 0              | -0.559665               | 2.459604  | 1.229199 |
| 22               | 1                | 0              | -1.416434               | 1.366637  | 0.041795 |

|    |    |   |           |           |           |
|----|----|---|-----------|-----------|-----------|
| 23 | 1  | 0 | -0.837013 | 0.645853  | 3.543331  |
| 24 | 1  | 0 | -5.581081 | -0.052104 | 1.956606  |
| 25 | 6  | 0 | -0.766377 | 2.286466  | 8.140604  |
| 26 | 1  | 0 | -0.804302 | 2.705289  | 9.148336  |
| 27 | 1  | 0 | 0.251463  | 2.396912  | 7.741835  |
| 28 | 1  | 0 | -1.018534 | 1.217940  | 8.183961  |
| 29 | 45 | 0 | 2.898991  | -1.951738 | 0.450383  |
| 30 | 45 | 0 | 0.863650  | -0.585290 | 0.434524  |
| 31 | 1  | 0 | -3.426096 | 2.908337  | 0.071831  |
| 32 | 8  | 0 | 3.930086  | -0.234819 | 0.950984  |
| 33 | 8  | 0 | 2.057020  | 1.026367  | 0.934019  |
| 34 | 6  | 0 | 3.312096  | 0.870654  | 1.079001  |
| 35 | 6  | 0 | 4.130241  | 2.098464  | 1.400432  |
| 36 | 1  | 0 | 4.317598  | 2.650305  | 0.471910  |
| 37 | 1  | 0 | 3.573616  | 2.754275  | 2.074058  |
| 38 | 1  | 0 | 5.088229  | 1.815745  | 1.840077  |
| 39 | 8  | 0 | 1.229881  | -0.229776 | -1.578635 |
| 40 | 6  | 0 | 2.252829  | -0.753712 | -2.128168 |
| 41 | 8  | 0 | 3.119692  | -1.496258 | -1.563531 |
| 42 | 6  | 0 | 2.437500  | -0.484785 | -3.605961 |
| 43 | 1  | 0 | 2.163754  | 0.547881  | -3.835614 |
| 44 | 1  | 0 | 3.466651  | -0.687048 | -3.907225 |
| 45 | 1  | 0 | 1.767360  | -1.142363 | -4.171825 |
| 46 | 8  | 0 | 2.537459  | -2.315400 | 2.463695  |
| 47 | 8  | 0 | 0.649588  | -1.048024 | 2.455123  |
| 48 | 6  | 0 | 1.517221  | -1.793172 | 3.016794  |
| 49 | 6  | 0 | 1.335764  | -2.065808 | 4.494662  |
| 50 | 1  | 0 | 1.627743  | -3.093272 | 4.724563  |
| 51 | 1  | 0 | 1.994265  | -1.396494 | 5.060704  |
| 52 | 1  | 0 | 0.302672  | -1.882901 | 4.795603  |
| 53 | 8  | 0 | 1.704114  | -3.559077 | -0.051566 |
| 54 | 8  | 0 | -0.171199 | -2.300901 | -0.066944 |
| 55 | 6  | 0 | 0.448999  | -3.404680 | -0.198411 |
| 56 | 6  | 0 | -0.368624 | -4.631734 | -0.524183 |
| 57 | 1  | 0 | 0.212707  | -5.319014 | -1.142707 |
| 58 | 1  | 0 | -0.620730 | -5.145709 | 0.410837  |
| 59 | 1  | 0 | -1.296138 | -4.349280 | -1.025622 |

-----

Thermal correction to Gibbs Free Energy= 0.386158  
Sum of electronic and thermal Free Energies= -1674.787795  
SCRF= -1677.01997079  
<S\*\*>2=2.009

## s-TS3

| Center<br>Number | Atomic<br>Number | Atomic<br>Type | Coordinates (Angstroms) |           |           |
|------------------|------------------|----------------|-------------------------|-----------|-----------|
|                  |                  |                | X                       | Y         | Z         |
| 1                | 6                | 0              | 4.624516                | -0.636152 | -0.066155 |
| 2                | 6                | 0              | 3.584447                | -0.929492 | 0.828538  |
| 3                | 6                | 0              | 3.825726                | -1.591960 | 2.032624  |
| 4                | 6                | 0              | 5.129172                | -1.984108 | 2.362309  |
| 5                | 6                | 0              | 6.179036                | -1.696119 | 1.477771  |
| 6                | 6                | 0              | 5.926210                | -1.025853 | 0.286014  |
| 7                | 6                | 0              | 4.304011                | 0.108397  | -1.333654 |
| 8                | 6                | 0              | 3.909637                | -0.703206 | -2.580267 |
| 9                | 6                | 0              | 3.659964                | 1.435060  | -1.200287 |
| 10               | 1                | 0              | 2.989219                | -1.774470 | 2.696647  |
| 11               | 8                | 0              | 5.478833                | -2.636572 | 3.507621  |
| 12               | 1                | 0              | 7.186099                | -1.995004 | 1.751795  |
| 13               | 1                | 0              | 6.762520                | -0.790527 | -0.366341 |
| 14               | 1                | 0              | 3.876745                | -1.779540 | -2.449818 |
| 15               | 1                | 0              | 3.114553                | -0.292448 | -3.197360 |
| 16               | 1                | 0              | 2.433598                | 1.222886  | -0.858488 |
| 17               | 1                | 0              | 3.469965                | 1.913004  | -2.167534 |
| 18               | 1                | 0              | 2.565725                | -0.633750 | 0.601066  |
| 19               | 6                | 0              | 4.457553                | -2.928598 | 4.449439  |
| 20               | 1                | 0              | 4.952205                | -3.439206 | 5.277873  |
| 21               | 1                | 0              | 3.691058                | -3.588241 | 4.021862  |
| 22               | 1                | 0              | 3.976940                | -2.014001 | 4.820118  |
| 23               | 7                | 0              | -0.533808               | 1.331875  | 0.342589  |
| 24               | 16               | 0              | 0.231669                | 1.445162  | 1.944832  |
| 25               | 16               | 0              | -1.144187               | 2.882033  | -0.302259 |
| 26               | 6                | 0              | -1.996425               | 0.774494  | 3.443112  |
| 27               | 6                | 0              | -2.963422               | 1.036806  | 4.414592  |
| 28               | 6                | 0              | -3.008969               | 2.280969  | 5.047333  |
| 29               | 6                | 0              | -2.086598               | 3.275924  | 4.711500  |
| 30               | 6                | 0              | -1.122016               | 3.035559  | 3.735366  |
| 31               | 6                | 0              | -1.092376               | 1.785386  | 3.112972  |
| 32               | 6                | 0              | 0.486669                | 3.459907  | -2.439492 |
| 33               | 6                | 0              | 1.447324                | 4.219924  | -3.105450 |
| 34               | 6                | 0              | 2.115422                | 5.251383  | -2.436223 |
| 35               | 6                | 0              | 1.827069                | 5.525704  | -1.097453 |
| 36               | 6                | 0              | 0.869007                | 4.770959  | -0.416091 |
| 37               | 6                | 0              | 0.214415                | 3.747693  | -1.100304 |
| 38               | 1                | 0              | -1.942979               | -0.185269 | 2.942525  |



|    |    |   |           |           |           |
|----|----|---|-----------|-----------|-----------|
| 39 | 1  | 0 | -3.679727 | 0.264141  | 4.680079  |
| 40 | 1  | 0 | -3.763075 | 2.476444  | 5.805083  |
| 41 | 1  | 0 | -2.120733 | 4.242297  | 5.206322  |
| 42 | 1  | 0 | -0.403483 | 3.794560  | 3.453154  |
| 43 | 1  | 0 | -0.051714 | 2.659866  | -2.935400 |
| 44 | 1  | 0 | 1.665379  | 4.017561  | -4.150620 |
| 45 | 1  | 0 | 2.856002  | 5.847298  | -2.962990 |
| 46 | 1  | 0 | 2.341175  | 6.332144  | -0.582286 |
| 47 | 1  | 0 | 0.626333  | 4.969959  | 0.620435  |
| 48 | 8  | 0 | -2.092838 | 2.537076  | -1.353885 |
| 49 | 8  | 0 | 1.146982  | 2.591746  | 1.966036  |
| 50 | 8  | 0 | 0.724132  | 0.091542  | 2.196759  |
| 51 | 45 | 0 | -2.518314 | -2.515897 | -1.481881 |
| 52 | 45 | 0 | -1.439524 | -0.590314 | -0.469447 |
| 53 | 8  | 0 | -4.335725 | -1.563758 | -1.280126 |
| 54 | 8  | 0 | -3.340188 | 0.206205  | -0.274303 |
| 55 | 6  | 0 | -4.350796 | -0.418781 | -0.727130 |
| 56 | 6  | 0 | -5.685005 | 0.279635  | -0.588553 |
| 57 | 1  | 0 | -5.875129 | 0.499544  | 0.466797  |
| 58 | 1  | 0 | -5.644162 | 1.236601  | -1.118441 |
| 59 | 1  | 0 | -6.487565 | -0.339600 | -0.992135 |
| 60 | 8  | 0 | -1.740140 | -1.558868 | 1.356193  |
| 61 | 6  | 0 | -2.296640 | -2.705104 | 1.388658  |
| 62 | 8  | 0 | -2.725511 | -3.355909 | 0.388463  |
| 63 | 6  | 0 | -2.486122 | -3.330533 | 2.754413  |
| 64 | 1  | 0 | -3.415140 | -2.949365 | 3.195343  |
| 65 | 1  | 0 | -2.568598 | -4.415444 | 2.665046  |
| 66 | 1  | 0 | -1.658219 | -3.060326 | 3.414004  |
| 67 | 8  | 0 | -2.284575 | -1.634168 | -3.326002 |
| 68 | 8  | 0 | -1.181260 | 0.119894  | -2.408214 |
| 69 | 6  | 0 | -1.671963 | -0.523485 | -3.389006 |
| 70 | 6  | 0 | -1.511999 | 0.106965  | -4.756009 |
| 71 | 1  | 0 | -0.454484 | 0.318363  | -4.944182 |
| 72 | 1  | 0 | -1.902937 | -0.552779 | -5.532019 |
| 73 | 1  | 0 | -2.050151 | 1.060574  | -4.774680 |
| 74 | 8  | 0 | -0.674078 | -3.412572 | -1.638389 |
| 75 | 8  | 0 | 0.357537  | -1.625396 | -0.692493 |
| 76 | 6  | 0 | 0.344296  | -2.796273 | -1.189218 |
| 77 | 6  | 0 | 1.662654  | -3.536344 | -1.273723 |
| 78 | 1  | 0 | 2.425704  | -3.044426 | -0.669384 |
| 79 | 1  | 0 | 1.521704  | -4.568664 | -0.941481 |
| 80 | 1  | 0 | 1.986992  | -3.571420 | -2.320214 |
| 81 | 8  | 0 | -1.570500 | 3.681134  | 0.852228  |
| 82 | 9  | 0 | 1.295025  | 1.244124  | -0.493727 |

|    |   |   |          |           |           |
|----|---|---|----------|-----------|-----------|
| 83 | 6 | 0 | 4.127357 | 2.397800  | -0.132673 |
| 84 | 1 | 0 | 5.145833 | 2.739434  | -0.377850 |
| 85 | 1 | 0 | 3.475019 | 3.272260  | -0.084727 |
| 86 | 1 | 0 | 4.155381 | 1.929552  | 0.853182  |
| 87 | 6 | 0 | 5.234275 | -0.035028 | -2.570338 |
| 88 | 1 | 0 | 6.120857 | -0.645395 | -2.427814 |
| 89 | 1 | 0 | 5.390207 | 0.850850  | -3.178326 |

-----

Thermal correction to Gibbs Free Energy= 0.574116  
Sum of electronic and thermal Free Energies= -3389.494807  
SCRF= -3391.83716843  
<S\*\*>2=0.000

### t-TS3

-----

| Center<br>Number | Atomic<br>Number | Atomic<br>Type | Coordinates (Angstroms) |           |           |
|------------------|------------------|----------------|-------------------------|-----------|-----------|
|                  |                  |                | X                       | Y         | Z         |
| 1                | 6                | 0              | 4.757575                | -0.559059 | -0.074098 |
| 2                | 6                | 0              | 3.594452                | -0.688578 | 0.714720  |
| 3                | 6                | 0              | 3.586684                | -1.437544 | 1.885915  |
| 4                | 6                | 0              | 4.758305                | -2.089056 | 2.302956  |
| 5                | 6                | 0              | 5.927007                | -1.981818 | 1.524421  |
| 6                | 6                | 0              | 5.920655                | -1.229334 | 0.360874  |
| 7                | 6                | 0              | 4.695260                | 0.262240  | -1.322315 |
| 8                | 6                | 0              | 4.649207                | -0.509408 | -2.663659 |
| 9                | 6                | 0              | 3.897195                | 1.538919  | -1.273099 |
| 10               | 1                | 0              | 2.665839                | -1.485800 | 2.454072  |
| 11               | 8                | 0              | 4.867314                | -2.836272 | 3.429550  |
| 12               | 1                | 0              | 6.826453                | -2.483663 | 1.867130  |
| 13               | 1                | 0              | 6.845588                | -1.141941 | -0.199966 |
| 14               | 1                | 0              | 4.688698                | -1.592661 | -2.602114 |
| 15               | 1                | 0              | 3.969244                | -0.117280 | -3.415800 |
| 16               | 1                | 0              | 2.781272                | 1.304819  | -1.083219 |
| 17               | 1                | 0              | 3.892661                | 2.004089  | -2.267198 |
| 18               | 1                | 0              | 2.671305                | -0.210954 | 0.404242  |
| 19               | 6                | 0              | 3.731149                | -2.949169 | 4.280066  |
| 20               | 1                | 0              | 4.050728                | -3.567218 | 5.120555  |
| 21               | 1                | 0              | 2.894133                | -3.435204 | 3.763924  |
| 22               | 1                | 0              | 3.408509                | -1.967100 | 4.645605  |
| 23               | 7                | 0              | -0.749630               | 1.278761  | 0.397266  |
| 24               | 16               | 0              | 0.177531                | 1.355695  | 1.877113  |
| 25               | 16               | 0              | -1.310310               | 2.829621  | -0.223806 |

|    |    |   |           |           |           |
|----|----|---|-----------|-----------|-----------|
| 26 | 6  | 0 | -1.918487 | 0.745560  | 3.587101  |
| 27 | 6  | 0 | -2.780722 | 1.029306  | 4.646735  |
| 28 | 6  | 0 | -2.722074 | 2.267200  | 5.291517  |
| 29 | 6  | 0 | -1.800200 | 3.231874  | 4.877535  |
| 30 | 6  | 0 | -0.939214 | 2.967256  | 3.813553  |
| 31 | 6  | 0 | -1.010290 | 1.725202  | 3.180773  |
| 32 | 6  | 0 | 0.345455  | 3.272931  | -2.377296 |
| 33 | 6  | 0 | 1.299357  | 4.005718  | -3.080388 |
| 34 | 6  | 0 | 1.943719  | 5.088542  | -2.472587 |
| 35 | 6  | 0 | 1.638156  | 5.442318  | -1.156352 |
| 36 | 6  | 0 | 0.684745  | 4.716730  | -0.439303 |
| 37 | 6  | 0 | 0.051002  | 3.644033  | -1.063917 |
| 38 | 1  | 0 | -1.947864 | -0.209378 | 3.075677  |
| 39 | 1  | 0 | -3.497144 | 0.279596  | 4.971830  |
| 40 | 1  | 0 | -3.394936 | 2.480527  | 6.117880  |
| 41 | 1  | 0 | -1.753959 | 4.194162  | 5.379474  |
| 42 | 1  | 0 | -0.223374 | 3.703670  | 3.470229  |
| 43 | 1  | 0 | -0.166218 | 2.428469  | -2.822799 |
| 44 | 1  | 0 | 1.537325  | 3.736460  | -4.105947 |
| 45 | 1  | 0 | 2.681087  | 5.661176  | -3.029178 |
| 46 | 1  | 0 | 2.135213  | 6.287062  | -0.687827 |
| 47 | 1  | 0 | 0.425930  | 4.977171  | 0.579473  |
| 48 | 8  | 0 | -2.305906 | 2.513456  | -1.244089 |
| 49 | 8  | 0 | 1.118422  | 2.478043  | 1.815982  |
| 50 | 8  | 0 | 0.653848  | -0.011117 | 2.097915  |
| 51 | 45 | 0 | -2.526797 | -2.525946 | -1.476937 |
| 52 | 45 | 0 | -1.500252 | -0.579213 | -0.455844 |
| 53 | 8  | 0 | -4.369623 | -1.643695 | -1.265979 |
| 54 | 8  | 0 | -3.426831 | 0.143146  | -0.251971 |
| 55 | 6  | 0 | -4.422792 | -0.502742 | -0.705535 |
| 56 | 6  | 0 | -5.773598 | 0.155686  | -0.556938 |
| 57 | 1  | 0 | -6.558146 | -0.480610 | -0.969197 |
| 58 | 1  | 0 | -5.968088 | 0.354658  | 0.501695  |
| 59 | 1  | 0 | -5.757826 | 1.121013  | -1.072493 |
| 60 | 8  | 0 | -1.785638 | -1.555957 | 1.364959  |
| 61 | 6  | 0 | -2.296452 | -2.722814 | 1.391498  |
| 62 | 8  | 0 | -2.695020 | -3.385315 | 0.385168  |
| 63 | 6  | 0 | -2.466876 | -3.358964 | 2.753489  |
| 64 | 1  | 0 | -3.403516 | -3.001970 | 3.198082  |
| 65 | 1  | 0 | -2.521675 | -4.445062 | 2.658563  |
| 66 | 1  | 0 | -1.644333 | -3.069873 | 3.411658  |
| 67 | 8  | 0 | -2.335971 | -1.630350 | -3.313940 |
| 68 | 8  | 0 | -1.292113 | 0.150894  | -2.384822 |
| 69 | 6  | 0 | -1.763999 | -0.496667 | -3.371806 |

|    |   |   |           |           |           |
|----|---|---|-----------|-----------|-----------|
| 70 | 6 | 0 | -1.627655 | 0.152147  | -4.730325 |
| 71 | 1 | 0 | -0.570714 | 0.348416  | -4.937281 |
| 72 | 1 | 0 | -2.044792 | -0.491585 | -5.506065 |
| 73 | 1 | 0 | -2.149189 | 1.114662  | -4.721695 |
| 74 | 8 | 0 | -0.671633 | -3.369928 | -1.676864 |
| 75 | 8 | 0 | 0.296411  | -1.580889 | -0.682800 |
| 76 | 6 | 0 | 0.333521  | -2.724422 | -1.233152 |
| 77 | 6 | 0 | 1.693691  | -3.360115 | -1.402547 |
| 78 | 1 | 0 | 2.371540  | -3.019484 | -0.617707 |
| 79 | 1 | 0 | 1.603228  | -4.448557 | -1.398432 |
| 80 | 1 | 0 | 2.105613  | -3.051941 | -2.370846 |
| 81 | 8 | 0 | -1.677737 | 3.649387  | 0.937229  |
| 82 | 9 | 0 | 1.348379  | 1.068852  | -0.736734 |
| 83 | 6 | 0 | 4.312856  | 2.546367  | -0.200225 |
| 84 | 1 | 0 | 5.360651  | 2.848083  | -0.340106 |
| 85 | 1 | 0 | 3.684628  | 3.439044  | -0.256710 |
| 86 | 1 | 0 | 4.205589  | 2.130561  | 0.804958  |
| 87 | 6 | 0 | 5.871647  | 0.261119  | -2.313184 |
| 88 | 1 | 0 | 6.768209  | -0.290001 | -2.047631 |
| 89 | 1 | 0 | 6.065679  | 1.200339  | -2.822810 |

---

Thermal correction to Gibbs Free Energy= 0.573588  
Sum of electronic and thermal Free Energies= -3389.499258  
SCRF= -3391.84939937  
<S\*\*>2=2.011

### s-IM3

---

| Center<br>Number | Atomic<br>Number | Atomic<br>Type | Coordinates (Angstroms) |           |           |
|------------------|------------------|----------------|-------------------------|-----------|-----------|
|                  |                  |                | X                       | Y         | Z         |
| 1                | 6                | 0              | 4.353537                | -0.179824 | -0.150478 |
| 2                | 6                | 0              | 3.684560                | -0.554856 | 1.021881  |
| 3                | 6                | 0              | 4.301699                | -1.393137 | 1.954227  |
| 4                | 6                | 0              | 5.600207                | -1.866383 | 1.722326  |
| 5                | 6                | 0              | 6.274496                | -1.493339 | 0.546336  |
| 6                | 6                | 0              | 5.655202                | -0.662859 | -0.376406 |
| 7                | 6                | 0              | 3.723029                | 0.735507  | -1.150798 |
| 8                | 6                | 0              | 2.107013                | 0.369722  | -1.654059 |
| 9                | 6                | 0              | 3.787537                | 2.108531  | -1.081464 |
| 10               | 1                | 0              | 3.754237                | -1.665498 | 2.848770  |
| 11               | 8                | 0              | 6.288119                | -2.683183 | 2.559515  |
| 12               | 1                | 0              | 7.278537                | -1.870621 | 0.381253  |
| 13               | 1                | 0              | 6.187920                | -0.383601 | -1.282705 |

|    |    |   |           |           |           |
|----|----|---|-----------|-----------|-----------|
| 14 | 1  | 0 | 1.734670  | -0.397772 | -0.975936 |
| 15 | 1  | 0 | 1.465864  | 1.231171  | -1.781847 |
| 16 | 1  | 0 | 3.288665  | 2.684742  | -1.861234 |
| 17 | 1  | 0 | 2.668880  | -0.217204 | 1.221710  |
| 18 | 6  | 0 | 5.657262  | -3.111481 | 3.761572  |
| 19 | 1  | 0 | 6.382996  | -3.752161 | 4.264526  |
| 20 | 1  | 0 | 4.746275  | -3.685876 | 3.552620  |
| 21 | 1  | 0 | 5.410279  | -2.261327 | 4.409513  |
| 22 | 7  | 0 | -0.517079 | 1.549490  | 0.188666  |
| 23 | 16 | 0 | -0.294875 | 1.475719  | 1.857382  |
| 24 | 16 | 0 | -1.218999 | 2.900476  | -0.502720 |
| 25 | 6  | 0 | -0.156962 | 4.048846  | 2.933064  |
| 26 | 6  | 0 | 0.523783  | 5.142425  | 3.472373  |
| 27 | 6  | 0 | 1.918823  | 5.136915  | 3.554810  |
| 28 | 6  | 0 | 2.638980  | 4.025926  | 3.108553  |
| 29 | 6  | 0 | 1.966092  | 2.930359  | 2.560883  |
| 30 | 6  | 0 | 0.574206  | 2.958472  | 2.454021  |
| 31 | 6  | 0 | 0.475444  | 3.438837  | -2.635693 |
| 32 | 6  | 0 | 1.493098  | 4.130662  | -3.299570 |
| 33 | 6  | 0 | 2.202227  | 5.140851  | -2.639185 |
| 34 | 6  | 0 | 1.887453  | 5.459537  | -1.314467 |
| 35 | 6  | 0 | 0.870381  | 4.772649  | -0.644550 |
| 36 | 6  | 0 | 0.177443  | 3.755782  | -1.305792 |
| 37 | 1  | 0 | -1.237172 | 4.032717  | 2.872684  |
| 38 | 1  | 0 | -0.040021 | 5.994921  | 3.841089  |
| 39 | 1  | 0 | 2.441706  | 5.986482  | 3.986365  |
| 40 | 1  | 0 | 3.721343  | 4.001426  | 3.211540  |
| 41 | 1  | 0 | 2.504094  | 2.039547  | 2.256387  |
| 42 | 1  | 0 | -0.113191 | 2.676761  | -3.137426 |
| 43 | 1  | 0 | 1.709751  | 3.904550  | -4.341025 |
| 44 | 1  | 0 | 2.976693  | 5.695211  | -3.163444 |
| 45 | 1  | 0 | 2.415817  | 6.263267  | -0.807930 |
| 46 | 1  | 0 | 0.594042  | 5.042303  | 0.368687  |
| 47 | 8  | 0 | -2.062035 | 2.498409  | -1.630037 |
| 48 | 8  | 0 | 0.679148  | 0.377056  | 2.027903  |
| 49 | 8  | 0 | -1.554778 | 1.448899  | 2.604345  |
| 50 | 45 | 0 | -2.337996 | -2.680157 | -1.443764 |
| 51 | 45 | 0 | -1.379353 | -0.629240 | -0.558637 |
| 52 | 8  | 0 | -4.101010 | -1.677298 | -1.764102 |
| 53 | 8  | 0 | -3.262834 | 0.173565  | -0.757479 |
| 54 | 6  | 0 | -4.189478 | -0.486000 | -1.318024 |
| 55 | 6  | 0 | -5.527118 | 0.208733  | -1.442287 |
| 56 | 1  | 0 | -6.051484 | 0.144037  | -0.481782 |
| 57 | 1  | 0 | -5.372447 | 1.265947  | -1.670082 |

|    |   |   |           |           |           |
|----|---|---|-----------|-----------|-----------|
| 58 | 1 | 0 | -6.137542 | -0.271429 | -2.209721 |
| 59 | 8 | 0 | -1.970982 | -1.287566 | 1.298903  |
| 60 | 6 | 0 | -2.634925 | -2.363069 | 1.409951  |
| 61 | 8 | 0 | -2.956008 | -3.153167 | 0.462827  |
| 62 | 6 | 0 | -3.110473 | -2.727209 | 2.799344  |
| 63 | 1 | 0 | -4.168617 | -2.456351 | 2.891966  |
| 64 | 1 | 0 | -3.024668 | -3.805754 | 2.955843  |
| 65 | 1 | 0 | -2.540977 | -2.176983 | 3.549946  |
| 66 | 8 | 0 | -1.681392 | -2.091754 | -3.325258 |
| 67 | 8 | 0 | -0.778722 | -0.169040 | -2.522977 |
| 68 | 6 | 0 | -1.083936 | -0.981333 | -3.456246 |
| 69 | 6 | 0 | -0.725412 | -0.562734 | -4.869165 |
| 70 | 1 | 0 | 0.213143  | -0.001847 | -4.879701 |
| 71 | 1 | 0 | -0.656919 | -1.434735 | -5.522526 |
| 72 | 1 | 0 | -1.514506 | 0.096742  | -5.249077 |
| 73 | 8 | 0 | -0.538582 | -3.637814 | -1.077400 |
| 74 | 8 | 0 | 0.428488  | -1.716309 | -0.363991 |
| 75 | 6 | 0 | 0.435333  | -2.964119 | -0.630312 |
| 76 | 6 | 0 | 1.736002  | -3.715760 | -0.420830 |
| 77 | 1 | 0 | 2.410880  | -3.159595 | 0.231918  |
| 78 | 1 | 0 | 1.525121  | -4.701414 | 0.001954  |
| 79 | 1 | 0 | 2.221749  | -3.874211 | -1.391476 |
| 80 | 8 | 0 | -1.738860 | 3.845318  | 0.500324  |
| 81 | 6 | 0 | 4.467416  | 2.900965  | -0.036275 |
| 82 | 1 | 0 | 5.139723  | 3.625854  | -0.515975 |
| 83 | 1 | 0 | 3.715387  | 3.501900  | 0.496078  |
| 84 | 1 | 0 | 5.018924  | 2.285152  | 0.675125  |
| 85 | 6 | 0 | 3.216403  | 0.126437  | -2.525965 |
| 86 | 1 | 0 | 3.586689  | -0.890087 | -2.626871 |
| 87 | 1 | 0 | 3.363996  | 0.762795  | -3.394508 |

-----  
Thermal correction to Gibbs Free Energy= 0.564633  
Sum of electronic and thermal Free Energies= -3289.126094  
SCRF= -3291.50519695  
<S\*\*>2=0.000

### t-IM3

| Center<br>Number | Atomic<br>Number | Atomic<br>Type | Coordinates (Angstroms) |           |           |
|------------------|------------------|----------------|-------------------------|-----------|-----------|
|                  |                  |                | X                       | Y         | Z         |
| 1                | 6                | 0              | 5.067416                | -0.116855 | -0.866735 |
| 2                | 6                | 0              | 3.775979                | -0.216712 | -0.337550 |

|    |    |   |           |           |           |
|----|----|---|-----------|-----------|-----------|
| 3  | 6  | 0 | 3.545652  | -0.588926 | 0.992210  |
| 4  | 6  | 0 | 4.637961  | -0.857439 | 1.829671  |
| 5  | 6  | 0 | 5.940688  | -0.754364 | 1.317830  |
| 6  | 6  | 0 | 6.144679  | -0.390472 | -0.008470 |
| 7  | 6  | 0 | 5.288864  | 0.305063  | -2.298771 |
| 8  | 6  | 0 | 4.705228  | -0.582508 | -3.396602 |
| 9  | 6  | 0 | 5.339819  | 1.757042  | -2.574721 |
| 10 | 1  | 0 | 2.524790  | -0.665352 | 1.350962  |
| 11 | 8  | 0 | 4.540185  | -1.225503 | 3.137681  |
| 12 | 1  | 0 | 6.775426  | -0.969714 | 1.978043  |
| 13 | 1  | 0 | 7.160406  | -0.321571 | -0.390434 |
| 14 | 1  | 0 | 4.128026  | -1.447537 | -3.081993 |
| 15 | 1  | 0 | 4.326220  | -0.090525 | -4.289322 |
| 16 | 1  | 0 | 5.372578  | 2.043808  | -3.625703 |
| 17 | 1  | 0 | 2.918876  | -0.007126 | -0.973297 |
| 18 | 6  | 0 | 3.240355  | -1.371995 | 3.698872  |
| 19 | 1  | 0 | 3.398691  | -1.654444 | 4.741417  |
| 20 | 1  | 0 | 2.670234  | -2.159328 | 3.189418  |
| 21 | 1  | 0 | 2.666228  | -0.440368 | 3.651555  |
| 22 | 7  | 0 | -1.105452 | 1.252785  | 0.687949  |
| 23 | 16 | 0 | -0.568897 | 1.135614  | 2.339173  |
| 24 | 16 | 0 | -1.632384 | 2.796654  | 0.080103  |
| 25 | 6  | 0 | -0.091114 | 3.605446  | 3.468865  |
| 26 | 6  | 0 | 0.732110  | 4.670480  | 3.834843  |
| 27 | 6  | 0 | 2.071851  | 4.692204  | 3.437301  |
| 28 | 6  | 0 | 2.599114  | 3.647333  | 2.673933  |
| 29 | 6  | 0 | 1.789991  | 2.573058  | 2.304047  |
| 30 | 6  | 0 | 0.450294  | 2.571746  | 2.701583  |
| 31 | 6  | 0 | 0.646383  | 2.785583  | -1.490343 |
| 32 | 6  | 0 | 1.802531  | 3.370392  | -2.005584 |
| 33 | 6  | 0 | 2.176026  | 4.657999  | -1.606768 |
| 34 | 6  | 0 | 1.400938  | 5.365267  | -0.685528 |
| 35 | 6  | 0 | 0.252744  | 4.785039  | -0.144541 |
| 36 | 6  | 0 | -0.107041 | 3.500374  | -0.552928 |
| 37 | 1  | 0 | -1.132804 | 3.566465  | 3.762680  |
| 38 | 1  | 0 | 0.326667  | 5.480762  | 4.434003  |
| 39 | 1  | 0 | 2.708464  | 5.523505  | 3.728399  |
| 40 | 1  | 0 | 3.642123  | 3.661082  | 2.371516  |
| 41 | 1  | 0 | 2.195546  | 1.750423  | 1.725968  |
| 42 | 1  | 0 | 0.327865  | 1.797456  | -1.805778 |
| 43 | 1  | 0 | 2.420866  | 2.819761  | -2.708899 |
| 44 | 1  | 0 | 3.075690  | 5.109098  | -2.016090 |
| 45 | 1  | 0 | 1.691995  | 6.366350  | -0.380402 |
| 46 | 1  | 0 | -0.353958 | 5.307169  | 0.586523  |

|    |    |   |           |           |           |
|----|----|---|-----------|-----------|-----------|
| 47 | 8  | 0 | -2.507457 | 2.528662  | -1.057300 |
| 48 | 8  | 0 | 0.326827  | -0.027426 | 2.338807  |
| 49 | 8  | 0 | -1.737039 | 1.176303  | 3.219261  |
| 50 | 45 | 0 | -2.693872 | -2.505989 | -1.290858 |
| 51 | 45 | 0 | -1.766173 | -0.539353 | -0.240485 |
| 52 | 8  | 0 | -4.560238 | -1.665283 | -1.223337 |
| 53 | 8  | 0 | -3.709301 | 0.149830  | -0.182212 |
| 54 | 6  | 0 | -4.668116 | -0.518822 | -0.682394 |
| 55 | 6  | 0 | -6.034685 | 0.117097  | -0.618225 |
| 56 | 1  | 0 | -6.293891 | 0.314597  | 0.426671  |
| 57 | 1  | 0 | -6.005424 | 1.081027  | -1.135684 |
| 58 | 1  | 0 | -6.781380 | -0.535011 | -1.073642 |
| 59 | 8  | 0 | -2.144931 | -1.469670 | 1.560130  |
| 60 | 6  | 0 | -2.657547 | -2.634509 | 1.587341  |
| 61 | 8  | 0 | -2.980160 | -3.327750 | 0.570769  |
| 62 | 6  | 0 | -2.908322 | -3.219972 | 2.956152  |
| 63 | 1  | 0 | -3.717198 | -2.660566 | 3.438536  |
| 64 | 1  | 0 | -3.186342 | -4.272057 | 2.877382  |
| 65 | 1  | 0 | -2.014677 | -3.101127 | 3.574750  |
| 66 | 8  | 0 | -2.393973 | -1.622790 | -3.125431 |
| 67 | 8  | 0 | -1.413093 | 0.171229  | -2.158182 |
| 68 | 6  | 0 | -1.820388 | -0.490827 | -3.168259 |
| 69 | 6  | 0 | -1.593902 | 0.138890  | -4.522163 |
| 70 | 1  | 0 | -0.522215 | 0.302846  | -4.674921 |
| 71 | 1  | 0 | -1.986762 | -0.502105 | -5.312533 |
| 72 | 1  | 0 | -2.084276 | 1.116956  | -4.549217 |
| 73 | 8  | 0 | -0.810551 | -3.313669 | -1.335483 |
| 74 | 8  | 0 | 0.077534  | -1.473086 | -0.367016 |
| 75 | 6  | 0 | 0.159232  | -2.651350 | -0.847565 |
| 76 | 6  | 0 | 1.506331  | -3.330103 | -0.809624 |
| 77 | 1  | 0 | 2.311352  | -2.601207 | -0.709378 |
| 78 | 1  | 0 | 1.532372  | -3.998331 | 0.059380  |
| 79 | 1  | 0 | 1.638156  | -3.941357 | -1.705778 |
| 80 | 8  | 0 | -2.103279 | 3.631343  | 1.190492  |
| 81 | 6  | 0 | 5.747353  | 2.777107  | -1.561143 |
| 82 | 1  | 0 | 6.832281  | 2.748896  | -1.350863 |
| 83 | 1  | 0 | 5.520335  | 3.791527  | -1.908603 |
| 84 | 1  | 0 | 5.243940  | 2.622924  | -0.599422 |
| 85 | 6  | 0 | 6.184925  | -0.603469 | -3.166711 |
| 86 | 1  | 0 | 6.616528  | -1.478040 | -2.686910 |
| 87 | 1  | 0 | 6.831588  | -0.121066 | -3.894434 |

---

Thermal correction to Gibbs Free Energy= 0.557795  
 Sum of electronic and thermal Free Energies= -3289.107501  
 SCRF= -3291.43413837



<S\*\*>2=2.030

## s-TS4

| Center<br>Number | Atomic<br>Number | Atomic<br>Type | Coordinates (Angstroms) |           |           |
|------------------|------------------|----------------|-------------------------|-----------|-----------|
|                  |                  |                | X                       | Y         | Z         |
| 1                | 6                | 0              | 4.325217                | 0.336955  | -1.839021 |
| 2                | 6                | 0              | 4.440740                | 0.064771  | -0.469110 |
| 3                | 6                | 0              | 5.164798                | -1.039300 | -0.004973 |
| 4                | 6                | 0              | 5.792225                | -1.895510 | -0.917279 |
| 5                | 6                | 0              | 5.687056                | -1.635538 | -2.292657 |
| 6                | 6                | 0              | 4.964154                | -0.535868 | -2.740503 |
| 7                | 6                | 0              | 3.545043                | 1.516025  | -2.330949 |
| 8                | 6                | 0              | 1.223233                | 0.933757  | -1.485002 |
| 9                | 6                | 0              | 4.078847                | 2.737103  | -2.478689 |
| 10               | 1                | 0              | 5.236892                | -1.208204 | 1.063577  |
| 11               | 8                | 0              | 6.526060                | -2.994814 | -0.578101 |
| 12               | 1                | 0              | 6.189233                | -2.302550 | -2.986706 |
| 13               | 1                | 0              | 4.906706                | -0.336171 | -3.808213 |
| 14               | 1                | 0              | 1.685794                | 0.774432  | -0.525542 |
| 15               | 1                | 0              | 0.171131                | 1.161524  | -1.531948 |
| 16               | 1                | 0              | 3.421837                | 3.539107  | -2.816716 |
| 17               | 1                | 0              | 3.964474                | 0.723979  | 0.252320  |
| 18               | 6                | 0              | 6.686574                | -3.297407 | 0.797876  |
| 19               | 1                | 0              | 7.307773                | -4.194070 | 0.837338  |
| 20               | 1                | 0              | 5.722217                | -3.504719 | 1.281557  |
| 21               | 1                | 0              | 7.189589                | -2.482867 | 1.335497  |
| 22               | 7                | 0              | 0.939793                | 3.112754  | -0.232330 |
| 23               | 16               | 0              | 0.710237                | 2.355747  | 1.200538  |
| 24               | 16               | 0              | -0.246704               | 4.006274  | -0.977847 |
| 25               | 6                | 0              | -1.090688               | 3.721782  | 2.813505  |
| 26               | 6                | 0              | -1.405770               | 4.646827  | 3.810446  |
| 27               | 6                | 0              | -0.392977               | 5.362635  | 4.454504  |
| 28               | 6                | 0              | 0.945514                | 5.156054  | 4.109266  |
| 29               | 6                | 0              | 1.276724                | 4.234966  | 3.115488  |
| 30               | 6                | 0              | 0.251132                | 3.532177  | 2.478143  |
| 31               | 6                | 0              | 1.211905                | 6.094264  | -2.068040 |
| 32               | 6                | 0              | 1.747328                | 7.383034  | -2.062649 |
| 33               | 6                | 0              | 1.508819                | 8.236667  | -0.982971 |
| 34               | 6                | 0              | 0.726367                | 7.806081  | 0.091493  |
| 35               | 6                | 0              | 0.185281                | 6.519884  | 0.096085  |
| 36               | 6                | 0              | 0.441803                | 5.671867  | -0.983388 |

|    |    |   |           |           |           |
|----|----|---|-----------|-----------|-----------|
| 37 | 1  | 0 | -1.859287 | 3.160507  | 2.297120  |
| 38 | 1  | 0 | -2.444919 | 4.805937  | 4.084251  |
| 39 | 1  | 0 | -0.646855 | 6.079636  | 5.230775  |
| 40 | 1  | 0 | 1.732438  | 5.706561  | 4.617179  |
| 41 | 1  | 0 | 2.309989  | 4.047353  | 2.844158  |
| 42 | 1  | 0 | 1.365386  | 5.425810  | -2.908254 |
| 43 | 1  | 0 | 2.343979  | 7.722460  | -2.905017 |
| 44 | 1  | 0 | 1.925295  | 9.240419  | -0.982849 |
| 45 | 1  | 0 | 0.530214  | 8.474378  | 0.925437  |
| 46 | 1  | 0 | -0.439477 | 6.180819  | 0.915242  |
| 47 | 8  | 0 | -0.277158 | 3.562299  | -2.386645 |
| 48 | 8  | 0 | 2.029256  | 1.800059  | 1.555314  |
| 49 | 8  | 0 | -0.425697 | 1.375868  | 1.144690  |
| 50 | 45 | 0 | -1.262230 | -3.119224 | -0.068774 |
| 51 | 45 | 0 | -0.675776 | -0.835482 | 0.460930  |
| 52 | 8  | 0 | -2.776915 | -2.377190 | -1.264867 |
| 53 | 8  | 0 | -2.212619 | -0.233289 | -0.781233 |
| 54 | 6  | 0 | -2.928112 | -1.116177 | -1.356184 |
| 55 | 6  | 0 | -4.077386 | -0.613947 | -2.200170 |
| 56 | 1  | 0 | -3.823640 | 0.348272  | -2.650180 |
| 57 | 1  | 0 | -4.337720 | -1.347155 | -2.966170 |
| 58 | 1  | 0 | -4.948978 | -0.464236 | -1.552054 |
| 59 | 8  | 0 | -1.961917 | -0.954742 | 2.030164  |
| 60 | 6  | 0 | -2.601112 | -2.037160 | 2.241640  |
| 61 | 8  | 0 | -2.527778 | -3.095917 | 1.542594  |
| 62 | 6  | 0 | -3.504182 | -2.058762 | 3.452564  |
| 63 | 1  | 0 | -3.981241 | -1.084667 | 3.582935  |
| 64 | 1  | 0 | -4.253431 | -2.846134 | 3.352478  |
| 65 | 1  | 0 | -2.897363 | -2.259524 | 4.343130  |
| 66 | 8  | 0 | 0.039050  | -3.060893 | -1.685536 |
| 67 | 8  | 0 | 0.626294  | -0.932420 | -1.294648 |
| 68 | 6  | 0 | 0.683467  | -2.029319 | -1.989878 |
| 69 | 6  | 0 | 1.553872  | -2.085039 | -3.218101 |
| 70 | 1  | 0 | 2.564377  | -1.733955 | -2.992089 |
| 71 | 1  | 0 | 1.588207  | -3.111758 | -3.584062 |
| 72 | 1  | 0 | 1.130908  | -1.445411 | -4.000973 |
| 73 | 8  | 0 | 0.285020  | -3.734989 | 1.153118  |
| 74 | 8  | 0 | 0.841341  | -1.590034 | 1.646783  |
| 75 | 6  | 0 | 0.994468  | -2.850238 | 1.731561  |
| 76 | 6  | 0 | 2.146120  | -3.331731 | 2.586126  |
| 77 | 1  | 0 | 2.150780  | -2.793447 | 3.537830  |
| 78 | 1  | 0 | 2.078605  | -4.407740 | 2.753876  |
| 79 | 1  | 0 | 3.086009  | -3.101176 | 2.071509  |
| 80 | 8  | 0 | -1.507101 | 4.060851  | -0.218450 |

|    |   |   |          |          |           |
|----|---|---|----------|----------|-----------|
| 81 | 6 | 0 | 5.499173 | 3.138617 | -2.208304 |
| 82 | 1 | 0 | 5.959105 | 3.574907 | -3.105509 |
| 83 | 1 | 0 | 5.536468 | 3.911883 | -1.429383 |
| 84 | 1 | 0 | 6.112332 | 2.294620 | -1.882590 |
| 85 | 6 | 0 | 2.074152 | 1.299701 | -2.653686 |
| 86 | 1 | 0 | 1.940521 | 0.543138 | -3.438816 |
| 87 | 1 | 0 | 1.615091 | 2.211921 | -3.057120 |

-----  
Thermal correction to Gibbs Free Energy= 0.563483  
Sum of electronic and thermal Free Energies= -3289.141180  
SCRF= -3291.46329483  
<S\*\*>2=0.000

### t-TS4

| Center<br>Number | Atomic<br>Number | Atomic<br>Type | Coordinates (Angstroms) |           |           |
|------------------|------------------|----------------|-------------------------|-----------|-----------|
|                  |                  |                | X                       | Y         | Z         |
| 1                | 6                | 0              | 4.940647                | 1.092365  | 0.122194  |
| 2                | 6                | 0              | 4.421579                | 0.357955  | 1.196657  |
| 3                | 6                | 0              | 5.027492                | -0.827855 | 1.627868  |
| 4                | 6                | 0              | 6.173145                | -1.302257 | 0.977859  |
| 5                | 6                | 0              | 6.699489                | -0.581572 | -0.105092 |
| 6                | 6                | 0              | 6.089589                | 0.595434  | -0.520785 |
| 7                | 6                | 0              | 4.301078                | 2.363611  | -0.348231 |
| 8                | 6                | 0              | 2.069926                | 1.302611  | -1.040905 |
| 9                | 6                | 0              | 4.742018                | 3.577683  | 0.020779  |
| 10               | 1                | 0              | 4.600782                | -1.358146 | 2.471770  |
| 11               | 8                | 0              | 6.846506                | -2.439857 | 1.316459  |
| 12               | 1                | 0              | 7.589684                | -0.960672 | -0.597597 |
| 13               | 1                | 0              | 6.514381                | 1.148421  | -1.355116 |
| 14               | 1                | 0              | 2.030619                | 0.728506  | -0.126387 |
| 15               | 1                | 0              | 1.369442                | 1.027696  | -1.819658 |
| 16               | 1                | 0              | 4.226596                | 4.447871  | -0.389616 |
| 17               | 1                | 0              | 3.530264                | 0.703340  | 1.713615  |
| 18               | 6                | 0              | 6.374207                | -3.196767 | 2.419443  |
| 19               | 1                | 0              | 7.056884                | -4.042952 | 2.516449  |
| 20               | 1                | 0              | 5.356084                | -3.570923 | 2.247426  |
| 21               | 1                | 0              | 6.388452                | -2.610530 | 3.347667  |
| 22               | 7                | 0              | -0.314540               | 1.751179  | 0.006254  |
| 23               | 16               | 0              | -0.121407               | 1.862862  | 1.715868  |
| 24               | 16               | 0              | -1.317628               | 2.929882  | -0.753697 |
| 25               | 6                | 0              | -0.561442               | 4.393251  | 2.739917  |

|    |    |   |           |           |           |
|----|----|---|-----------|-----------|-----------|
| 26 | 6  | 0 | -0.158063 | 5.659321  | 3.165388  |
| 27 | 6  | 0 | 1.175342  | 6.056379  | 3.028497  |
| 28 | 6  | 0 | 2.112838  | 5.184250  | 2.470031  |
| 29 | 6  | 0 | 1.721641  | 3.914092  | 2.042851  |
| 30 | 6  | 0 | 0.385020  | 3.536582  | 2.172527  |
| 31 | 6  | 0 | 0.210842  | 3.683361  | -2.927780 |
| 32 | 6  | 0 | 1.057948  | 4.539336  | -3.632912 |
| 33 | 6  | 0 | 1.529962  | 5.711081  | -3.032992 |
| 34 | 6  | 0 | 1.149876  | 6.031238  | -1.727374 |
| 35 | 6  | 0 | 0.298646  | 5.183767  | -1.013023 |
| 36 | 6  | 0 | -0.153844 | 4.010366  | -1.618194 |
| 37 | 1  | 0 | -1.588631 | 4.064475  | 2.833482  |
| 38 | 1  | 0 | -0.885965 | 6.334069  | 3.607046  |
| 39 | 1  | 0 | 1.484508  | 7.042695  | 3.364584  |
| 40 | 1  | 0 | 3.151835  | 5.487344  | 2.373782  |
| 41 | 1  | 0 | 2.447838  | 3.230648  | 1.619247  |
| 42 | 1  | 0 | -0.184615 | 2.779692  | -3.380289 |
| 43 | 1  | 0 | 1.340020  | 4.298252  | -4.654323 |
| 44 | 1  | 0 | 2.183863  | 6.379026  | -3.587270 |
| 45 | 1  | 0 | 1.502564  | 6.949309  | -1.265656 |
| 46 | 1  | 0 | -0.028080 | 5.438705  | -0.011383 |
| 47 | 8  | 0 | -2.068182 | 2.250620  | -1.811792 |
| 48 | 8  | 0 | 1.038681  | 0.991841  | 1.981044  |
| 49 | 8  | 0 | -1.392191 | 1.615193  | 2.400869  |
| 50 | 45 | 0 | -1.784870 | -2.822324 | -1.125313 |
| 51 | 45 | 0 | -1.070157 | -0.573645 | -0.472331 |
| 52 | 8  | 0 | -3.704043 | -2.129393 | -1.177398 |
| 53 | 8  | 0 | -3.069183 | -0.072404 | -0.515842 |
| 54 | 6  | 0 | -3.949278 | -0.918278 | -0.851034 |
| 55 | 6  | 0 | -5.381998 | -0.450323 | -0.886826 |
| 56 | 1  | 0 | -6.061826 | -1.299817 | -0.963556 |
| 57 | 1  | 0 | -5.598783 | 0.138437  | 0.008855  |
| 58 | 1  | 0 | -5.514191 | 0.209526  | -1.751340 |
| 59 | 8  | 0 | -1.336311 | -1.188592 | 1.480969  |
| 60 | 6  | 0 | -1.728391 | -2.368199 | 1.733379  |
| 61 | 8  | 0 | -1.993882 | -3.275599 | 0.874813  |
| 62 | 6  | 0 | -1.906570 | -2.750332 | 3.184412  |
| 63 | 1  | 0 | -1.357128 | -3.676660 | 3.378475  |
| 64 | 1  | 0 | -1.552173 | -1.946951 | 3.829428  |
| 65 | 1  | 0 | -2.964374 | -2.952691 | 3.388508  |
| 66 | 8  | 0 | -1.552640 | -2.266558 | -3.103561 |
| 67 | 8  | 0 | -0.773471 | -0.215794 | -2.521303 |
| 68 | 6  | 0 | -1.100402 | -1.105490 | -3.367614 |
| 69 | 6  | 0 | -0.953295 | -0.739491 | -4.828640 |

|    |   |   |           |           |           |
|----|---|---|-----------|-----------|-----------|
| 70 | 1 | 0 | 0.041076  | -0.319889 | -5.007638 |
| 71 | 1 | 0 | -1.115375 | -1.611177 | -5.464153 |
| 72 | 1 | 0 | -1.687987 | 0.035329  | -5.073851 |
| 73 | 8 | 0 | 0.177312  | -3.403285 | -1.041071 |
| 74 | 8 | 0 | 0.873454  | -1.343214 | -0.446896 |
| 75 | 6 | 0 | 1.082682  | -2.565596 | -0.720764 |
| 76 | 6 | 0 | 2.510955  | -3.053561 | -0.705333 |
| 77 | 1 | 0 | 2.540383  | -4.105874 | -0.415041 |
| 78 | 1 | 0 | 2.927558  | -2.966952 | -1.716017 |
| 79 | 1 | 0 | 3.117195  | -2.445654 | -0.030571 |
| 80 | 8 | 0 | -2.024438 | 3.762404  | 0.230582  |
| 81 | 6 | 0 | 5.884329  | 3.879607  | 0.948017  |
| 82 | 1 | 0 | 6.651508  | 4.478456  | 0.438249  |
| 83 | 1 | 0 | 5.545975  | 4.475162  | 1.806934  |
| 84 | 1 | 0 | 6.356034  | 2.970676  | 1.329015  |
| 85 | 6 | 0 | 3.170173  | 2.239587  | -1.356510 |
| 86 | 1 | 0 | 3.593323  | 1.900703  | -2.324621 |
| 87 | 1 | 0 | 2.752486  | 3.230996  | -1.599055 |

-----

Thermal correction to Gibbs Free Energy= 0.557121  
Sum of electronic and thermal Free Energies= -3289.080516  
SCRF= -3291.40603947  
<S\*\*>2=2.014

## G

-----

| Center<br>Number | Atomic<br>Number | Atomic<br>Type | Coordinates (Angstroms) |           |           |
|------------------|------------------|----------------|-------------------------|-----------|-----------|
|                  |                  |                | X                       | Y         | Z         |
| 1                | 6                | 0              | 4.754775                | 1.045367  | -0.636695 |
| 2                | 6                | 0              | 5.642195                | 0.179276  | 0.017886  |
| 3                | 6                | 0              | 5.814407                | -1.148073 | -0.383870 |
| 4                | 6                | 0              | 5.080856                | -1.642757 | -1.467596 |
| 5                | 6                | 0              | 4.175975                | -0.797778 | -2.128142 |
| 6                | 6                | 0              | 4.014048                | 0.516121  | -1.713262 |
| 7                | 6                | 0              | 4.572015                | 2.456738  | -0.190638 |
| 8                | 6                | 0              | 2.436865                | 2.166423  | 1.148222  |
| 9                | 6                | 0              | 5.590521                | 3.306869  | 0.043752  |
| 10               | 1                | 0              | 6.507523                | -1.780659 | 0.159025  |
| 11               | 8                | 0              | 5.164155                | -2.916588 | -1.949357 |
| 12               | 1                | 0              | 3.606157                | -1.198163 | -2.960745 |
| 13               | 1                | 0              | 3.301928                | 1.144258  | -2.239826 |
| 14               | 1                | 0              | 2.979067                | 2.283475  | 2.089899  |

|    |    |   |           |           |           |
|----|----|---|-----------|-----------|-----------|
| 15 | 1  | 0 | 2.407193  | 1.096994  | 0.932782  |
| 16 | 1  | 0 | 5.328444  | 4.302201  | 0.405939  |
| 17 | 1  | 0 | 6.199429  | 0.541493  | 0.877028  |
| 18 | 6  | 0 | 6.044279  | -3.821946 | -1.304729 |
| 19 | 1  | 0 | 5.947274  | -4.767839 | -1.840960 |
| 20 | 1  | 0 | 5.769508  | -3.972752 | -0.252218 |
| 21 | 1  | 0 | 7.086955  | -3.480749 | -1.358632 |
| 22 | 7  | 0 | 1.045780  | 2.654472  | 1.383775  |
| 23 | 16 | 0 | 0.737596  | 3.431642  | 2.888000  |
| 24 | 16 | 0 | -0.234684 | 1.790809  | 0.568896  |
| 25 | 6  | 0 | 0.990990  | 5.933625  | 1.748407  |
| 26 | 6  | 0 | 1.612681  | 7.169269  | 1.579748  |
| 27 | 6  | 0 | 2.773389  | 7.476035  | 2.297984  |
| 28 | 6  | 0 | 3.314608  | 6.550576  | 3.191939  |
| 29 | 6  | 0 | 2.702204  | 5.307847  | 3.370779  |
| 30 | 6  | 0 | 1.550932  | 5.013785  | 2.639930  |
| 31 | 6  | 0 | -0.918398 | 3.756939  | -1.232873 |
| 32 | 6  | 0 | -1.772808 | 4.724240  | -1.761287 |
| 33 | 6  | 0 | -2.992791 | 4.998006  | -1.135467 |
| 34 | 6  | 0 | -3.365168 | 4.305442  | 0.018922  |
| 35 | 6  | 0 | -2.518554 | 3.338237  | 0.562382  |
| 36 | 6  | 0 | -1.300818 | 3.084070  | -0.069308 |
| 37 | 1  | 0 | 0.086188  | 5.685138  | 1.203549  |
| 38 | 1  | 0 | 1.189882  | 7.895072  | 0.891114  |
| 39 | 1  | 0 | 3.252675  | 8.441616  | 2.162608  |
| 40 | 1  | 0 | 4.210771  | 6.794275  | 3.755141  |
| 41 | 1  | 0 | 3.097142  | 4.577816  | 4.068748  |
| 42 | 1  | 0 | 0.020005  | 3.514547  | -1.719700 |
| 43 | 1  | 0 | -1.491261 | 5.254845  | -2.666321 |
| 44 | 1  | 0 | -3.657471 | 5.748920  | -1.553761 |
| 45 | 1  | 0 | -4.315922 | 4.516244  | 0.499554  |
| 46 | 1  | 0 | -2.782033 | 2.794306  | 1.461163  |
| 47 | 8  | 0 | 0.462113  | 1.177747  | -0.565402 |
| 48 | 8  | 0 | 1.446674  | 2.736569  | 3.963142  |
| 49 | 8  | 0 | -0.706994 | 3.648967  | 2.939912  |
| 50 | 8  | 0 | -0.993629 | 0.974812  | 1.511208  |
| 51 | 6  | 0 | 7.060945  | 3.082981  | -0.172903 |
| 52 | 1  | 0 | 7.494011  | 3.926195  | -0.727455 |
| 53 | 1  | 0 | 7.606538  | 3.027060  | 0.780174  |
| 54 | 1  | 0 | 7.265026  | 2.165280  | -0.730079 |
| 55 | 6  | 0 | 3.141901  | 2.929274  | 0.016616  |
| 56 | 1  | 0 | 2.556636  | 2.789162  | -0.899946 |
| 57 | 1  | 0 | 3.135731  | 4.000768  | 0.242307  |

Thermal correction to Gibbs Free Energy= 0.384359  
 Sum of electronic and thermal Free Energies= -2156.272262  
 SCRF= -2156.39455394  
 <S\*\*>2=0.000

## 2a(E)

| Center<br>Number | Atomic<br>Number | Atomic<br>Type | Coordinates (Angstroms) |           |           |
|------------------|------------------|----------------|-------------------------|-----------|-----------|
|                  |                  |                | X                       | Y         | Z         |
| 1                | 6                | 0              | 0.469808                | 5.117091  | -0.348184 |
| 2                | 6                | 0              | 0.862679                | 3.776325  | -0.313286 |
| 3                | 6                | 0              | 0.254844                | 2.858098  | 0.553686  |
| 4                | 6                | 0              | -0.768297               | 3.325385  | 1.401104  |
| 5                | 6                | 0              | -1.166911               | 4.656283  | 1.374850  |
| 6                | 6                | 0              | -0.549366               | 5.563710  | 0.501187  |
| 7                | 8                | 0              | -1.011742               | 6.847611  | 0.553897  |
| 8                | 6                | 0              | 0.702221                | 1.430841  | 0.586746  |
| 9                | 6                | 0              | -0.076421               | 0.406006  | 0.213858  |
| 10               | 6                | 0              | 2.150662                | 1.253785  | 1.065505  |
| 11               | 6                | 0              | 2.250438                | 1.490975  | 2.582212  |
| 12               | 7                | 0              | 2.771759                | -0.033994 | 0.599115  |
| 13               | 6                | 0              | -1.426094               | 0.559258  | -0.442025 |
| 14               | 7                | 0              | -2.408206               | -0.536803 | -0.214452 |
| 15               | 1                | 0              | 0.958434                | 5.793970  | -1.040144 |
| 16               | 1                | 0              | 1.639008                | 3.432338  | -0.990841 |
| 17               | 1                | 0              | -1.260219               | 2.631157  | 2.075806  |
| 18               | 1                | 0              | -1.954715               | 5.019034  | 2.027969  |
| 19               | 6                | 0              | -0.418448               | 7.809950  | -0.301321 |
| 20               | 1                | 0              | 0.318475                | -0.602674 | 0.244042  |
| 21               | 1                | 0              | 2.733699                | 2.046736  | 0.589352  |
| 22               | 1                | 0              | 3.284800                | 1.478232  | 2.927344  |
| 23               | 1                | 0              | 1.823001                | 2.478573  | 2.778520  |
| 24               | 1                | 0              | 1.669792                | 0.761183  | 3.150162  |
| 25               | 16               | 0              | 3.406544                | -1.279151 | 1.624389  |
| 26               | 16               | 0              | 3.069244                | -0.134287 | -1.121610 |
| 27               | 1                | 0              | -1.919597               | 1.484002  | -0.147463 |
| 28               | 1                | 0              | -1.297328               | 0.608360  | -1.529797 |
| 29               | 16               | 0              | -3.308734               | -0.530844 | 1.273523  |
| 30               | 16               | 0              | -2.195479               | -2.035432 | -1.048210 |
| 31               | 8                | 0              | 2.359297                | -1.289336 | -1.673128 |
| 32               | 8                | 0              | 2.765869                | 1.216829  | -1.609332 |
| 33               | 8                | 0              | 3.899581                | -2.290914 | 0.690680  |

|    |   |   |           |           |           |
|----|---|---|-----------|-----------|-----------|
| 34 | 8 | 0 | 4.312433  | -0.669526 | 2.599513  |
| 35 | 8 | 0 | -3.062012 | -1.771453 | 2.003668  |
| 36 | 8 | 0 | -2.998918 | 0.774357  | 1.862716  |
| 37 | 8 | 0 | -0.909190 | -2.641952 | -0.698259 |
| 38 | 8 | 0 | -3.443410 | -2.773667 | -0.850761 |
| 39 | 1 | 0 | -0.928510 | 8.752319  | -0.092417 |
| 40 | 1 | 0 | 0.654486  | 7.926184  | -0.097390 |
| 41 | 1 | 0 | -0.555870 | 7.551260  | -1.359938 |
| 42 | 6 | 0 | -5.025576 | -0.496596 | 0.755010  |
| 43 | 6 | 0 | -5.600314 | 0.735831  | 0.433024  |
| 44 | 6 | 0 | -5.763733 | -1.680674 | 0.739111  |
| 45 | 6 | 0 | -6.945725 | 0.774905  | 0.068721  |
| 46 | 1 | 0 | -5.009042 | 1.643551  | 0.485985  |
| 47 | 6 | 0 | -7.109944 | -1.624231 | 0.375857  |
| 48 | 1 | 0 | -5.286660 | -2.617773 | 0.997385  |
| 49 | 6 | 0 | -7.697927 | -0.402817 | 0.038936  |
| 50 | 1 | 0 | -7.407567 | 1.725451  | -0.182211 |
| 51 | 1 | 0 | -7.698404 | -2.536907 | 0.358412  |
| 52 | 1 | 0 | -8.747048 | -0.366712 | -0.241617 |
| 53 | 6 | 0 | -2.090251 | -1.498685 | -2.755114 |
| 54 | 6 | 0 | -0.835230 | -1.409218 | -3.363410 |
| 55 | 6 | 0 | -3.273925 | -1.231266 | -3.448570 |
| 56 | 6 | 0 | -0.774145 | -1.029112 | -4.705787 |
| 57 | 1 | 0 | 0.067620  | -1.626986 | -2.800979 |
| 58 | 6 | 0 | -3.192939 | -0.856020 | -4.788493 |
| 59 | 1 | 0 | -4.231645 | -1.330221 | -2.948567 |
| 60 | 6 | 0 | -1.946055 | -0.753968 | -5.413697 |
| 61 | 1 | 0 | 0.192618  | -0.950086 | -5.193781 |
| 62 | 1 | 0 | -4.101852 | -0.648455 | -5.345756 |
| 63 | 1 | 0 | -1.889780 | -0.461288 | -6.458570 |
| 64 | 6 | 0 | 4.834422  | -0.373813 | -1.345601 |
| 65 | 6 | 0 | 5.305743  | -1.601024 | -1.810636 |
| 66 | 6 | 0 | 5.686900  | 0.711045  | -1.129962 |
| 67 | 6 | 0 | 6.670747  | -1.742608 | -2.058243 |
| 68 | 1 | 0 | 4.613961  | -2.421269 | -1.957710 |
| 69 | 6 | 0 | 7.051036  | 0.550568  | -1.370555 |
| 70 | 1 | 0 | 5.291335  | 1.663023  | -0.792998 |
| 71 | 6 | 0 | 7.540890  | -0.672873 | -1.834598 |
| 72 | 1 | 0 | 7.054348  | -2.692516 | -2.418792 |
| 73 | 1 | 0 | 7.728254  | 1.382692  | -1.201743 |
| 74 | 1 | 0 | 8.604173  | -0.791962 | -2.023692 |
| 75 | 6 | 0 | 2.008000  | -1.958202 | 2.508338  |
| 76 | 6 | 0 | 1.957848  | -1.824685 | 3.898138  |
| 77 | 6 | 0 | 1.041731  | -2.673894 | 1.798111  |



|    |   |   |           |           |          |
|----|---|---|-----------|-----------|----------|
| 78 | 6 | 0 | 0.890860  | -2.402842 | 4.586468 |
| 79 | 1 | 0 | 2.740521  | -1.283568 | 4.417841 |
| 80 | 6 | 0 | -0.026634 | -3.231201 | 2.499244 |
| 81 | 1 | 0 | 1.107597  | -2.783623 | 0.721692 |
| 82 | 6 | 0 | -0.102074 | -3.093790 | 3.887764 |
| 83 | 1 | 0 | 0.834274  | -2.307079 | 5.667010 |
| 84 | 1 | 0 | -0.804281 | -3.752961 | 1.953170 |
| 85 | 1 | 0 | -0.942141 | -3.523822 | 4.425350 |

-----

Thermal correction to Gibbs Free Energy= 0.563902  
Sum of electronic and thermal Free Energies= -3770.639612  
<S\*\*>2=0.000

## 2a(Z)

| Center<br>Number | Atomic<br>Number | Atomic<br>Type | Coordinates (Angstroms) |           |           |
|------------------|------------------|----------------|-------------------------|-----------|-----------|
|                  |                  |                | X                       | Y         | Z         |
| 1                | 6                | 0              | -2.399288               | -4.559333 | -1.429237 |
| 2                | 6                | 0              | -1.778665               | -3.332808 | -1.189478 |
| 3                | 6                | 0              | -1.817596               | -2.712291 | 0.068329  |
| 4                | 6                | 0              | -2.541472               | -3.368162 | 1.084292  |
| 5                | 6                | 0              | -3.165595               | -4.589373 | 0.861858  |
| 6                | 6                | 0              | -3.096319               | -5.199713 | -0.398083 |
| 7                | 8                | 0              | -3.741739               | -6.396732 | -0.517775 |
| 8                | 6                | 0              | -1.113209               | -1.417045 | 0.293866  |
| 9                | 6                | 0              | 0.093909                | -1.221063 | -0.266423 |
| 10               | 6                | 0              | -1.826872               | -0.419165 | 1.224944  |
| 11               | 6                | 0              | -1.133929               | -0.478037 | 2.603711  |
| 12               | 7                | 0              | -1.905746               | 0.985127  | 0.644678  |
| 13               | 6                | 0              | 0.921057                | 0.034534  | -0.266375 |
| 14               | 7                | 0              | 2.379006                | -0.242057 | -0.382121 |
| 15               | 1                | 0              | -2.348416               | -4.990489 | -2.422644 |
| 16               | 1                | 0              | -1.281669               | -2.827691 | -2.011189 |
| 17               | 1                | 0              | -2.608795               | -2.935593 | 2.078348  |
| 18               | 1                | 0              | -3.711101               | -5.093034 | 1.653973  |
| 19               | 6                | 0              | -3.702300               | -7.055687 | -1.772873 |
| 20               | 1                | 0              | 0.515018                | -2.024796 | -0.864576 |
| 21               | 1                | 0              | -2.857818               | -0.760402 | 1.354000  |
| 22               | 1                | 0              | -1.691110               | 0.055059  | 3.372515  |
| 23               | 1                | 0              | -1.078593               | -1.532804 | 2.888833  |
| 24               | 1                | 0              | -0.106388               | -0.110767 | 2.562105  |

|    |    |   |           |           |           |
|----|----|---|-----------|-----------|-----------|
| 25 | 16 | 0 | -1.965269 | 2.400261  | 1.662660  |
| 26 | 16 | 0 | -2.649523 | 1.152657  | -0.951849 |
| 27 | 1  | 0 | 0.655986  | 0.665243  | -1.122509 |
| 28 | 1  | 0 | 0.773767  | 0.643577  | 0.620092  |
| 29 | 16 | 0 | 3.096753  | -0.170322 | -1.937741 |
| 30 | 16 | 0 | 3.319186  | -0.450880 | 1.049257  |
| 31 | 8  | 0 | -1.866999 | 2.156769  | -1.672087 |
| 32 | 8  | 0 | -2.753378 | -0.217226 | -1.452685 |
| 33 | 8  | 0 | -2.535152 | 3.454799  | 0.826555  |
| 34 | 8  | 0 | -2.595968 | 2.054069  | 2.937474  |
| 35 | 8  | 0 | 4.405489  | -0.807665 | -1.822707 |
| 36 | 8  | 0 | 2.076822  | -0.664158 | -2.861842 |
| 37 | 8  | 0 | 4.542348  | 0.341064  | 0.926509  |
| 38 | 8  | 0 | 2.370163  | -0.200857 | 2.137280  |
| 39 | 1  | 0 | -4.262643 | -7.983473 | -1.642363 |
| 40 | 1  | 0 | -4.175845 | -6.454633 | -2.560564 |
| 41 | 1  | 0 | -2.672847 | -7.292998 | -2.072754 |
| 42 | 6  | 0 | 3.320606  | 1.580629  | -2.257709 |
| 43 | 6  | 0 | 2.363995  | 2.255137  | -3.020799 |
| 44 | 6  | 0 | 4.446238  | 2.229829  | -1.742563 |
| 45 | 6  | 0 | 2.537146  | 3.619420  | -3.262362 |
| 46 | 1  | 0 | 1.513243  | 1.717886  | -3.425351 |
| 47 | 6  | 0 | 4.607026  | 3.591414  | -1.998402 |
| 48 | 1  | 0 | 5.167991  | 1.678685  | -1.151022 |
| 49 | 6  | 0 | 3.654867  | 4.284746  | -2.753198 |
| 50 | 1  | 0 | 1.801923  | 4.156792  | -3.853999 |
| 51 | 1  | 0 | 5.479552  | 4.110260  | -1.611749 |
| 52 | 1  | 0 | 3.788868  | 5.344947  | -2.950070 |
| 53 | 6  | 0 | 3.760099  | -2.186669 | 1.087540  |
| 54 | 6  | 0 | 5.039078  | -2.575867 | 0.688405  |
| 55 | 6  | 0 | 2.816606  | -3.108108 | 1.549503  |
| 56 | 6  | 0 | 5.376625  | -3.928052 | 0.753594  |
| 57 | 1  | 0 | 5.741767  | -1.834047 | 0.329611  |
| 58 | 6  | 0 | 3.168304  | -4.456107 | 1.603645  |
| 59 | 1  | 0 | 1.832472  | -2.774904 | 1.860163  |
| 60 | 6  | 0 | 4.445047  | -4.864363 | 1.207609  |
| 61 | 1  | 0 | 6.367833  | -4.248251 | 0.446285  |
| 62 | 1  | 0 | 2.446098  | -5.185606 | 1.958305  |
| 63 | 1  | 0 | 4.714001  | -5.916067 | 1.253629  |
| 64 | 6  | 0 | -4.341181 | 1.727857  | -0.752280 |
| 65 | 6  | 0 | -4.671794 | 3.045025  | -1.071044 |
| 66 | 6  | 0 | -5.309534 | 0.795061  | -0.371451 |
| 67 | 6  | 0 | -6.007242 | 3.437362  | -0.989627 |
| 68 | 1  | 0 | -3.894612 | 3.739345  | -1.364281 |

|    |   |   |           |           |           |
|----|---|---|-----------|-----------|-----------|
| 69 | 6 | 0 | -6.638832 | 1.207362  | -0.279847 |
| 70 | 1 | 0 | -5.033016 | -0.235242 | -0.175722 |
| 71 | 6 | 0 | -6.986136 | 2.524821  | -0.588005 |
| 72 | 1 | 0 | -6.281313 | 4.459036  | -1.235739 |
| 73 | 1 | 0 | -7.402353 | 0.495643  | 0.020141  |
| 74 | 1 | 0 | -8.023867 | 2.839691  | -0.521091 |
| 75 | 6 | 0 | -0.251973 | 2.829580  | 1.956343  |
| 76 | 6 | 0 | 0.272674  | 2.726827  | 3.244522  |
| 77 | 6 | 0 | 0.494587  | 3.345035  | 0.891466  |
| 78 | 6 | 0 | 1.590855  | 3.129132  | 3.464845  |
| 79 | 1 | 0 | -0.342266 | 2.344254  | 4.051188  |
| 80 | 6 | 0 | 1.810266  | 3.738919  | 1.127619  |
| 81 | 1 | 0 | 0.052080  | 3.427130  | -0.096218 |
| 82 | 6 | 0 | 2.357145  | 3.627581  | 2.410411  |
| 83 | 1 | 0 | 2.017989  | 3.047154  | 4.459692  |
| 84 | 1 | 0 | 2.409136  | 4.127776  | 0.309650  |
| 85 | 1 | 0 | 3.385906  | 3.928302  | 2.585926  |

-----  
Thermal correction to Gibbs Free Energy= 0.563712  
Sum of electronic and thermal Free Energies= -3770.633274  
<S\*\*>2=0.000

#### 4a(E)

| Center<br>Number | Atomic<br>Number | Atomic<br>Type | Coordinates (Angstroms) |           |           |
|------------------|------------------|----------------|-------------------------|-----------|-----------|
|                  |                  |                | X                       | Y         | Z         |
| 1                | 6                | 0              | 0.330211                | 4.265442  | 2.316749  |
| 2                | 6                | 0              | 0.332990                | 2.940705  | 1.878178  |
| 3                | 6                | 0              | 0.672384                | 2.607735  | 0.559832  |
| 4                | 6                | 0              | 1.000229                | 3.656834  | -0.319563 |
| 5                | 6                | 0              | 0.995182                | 4.980196  | 0.101352  |
| 6                | 6                | 0              | 0.660318                | 5.294681  | 1.426297  |
| 7                | 8                | 0              | 0.685348                | 6.619971  | 1.744780  |
| 8                | 6                | 0              | 0.683361                | 1.180923  | 0.109782  |
| 9                | 6                | 0              | 1.793906                | 0.582899  | -0.343509 |
| 10               | 6                | 0              | -0.698624               | 0.510569  | 0.146129  |
| 11               | 6                | 0              | -1.495129               | 1.066549  | -1.067807 |
| 12               | 7                | 0              | -0.698486               | -0.979697 | 0.370305  |
| 13               | 6                | 0              | 3.141791                | 1.251083  | -0.444929 |
| 14               | 7                | 0              | 4.280294                | 0.340368  | -0.143571 |
| 15               | 1                | 0              | 0.074501                | 4.479718  | 3.347997  |
| 16               | 1                | 0              | 0.094582                | 2.149380  | 2.581985  |

|    |    |   |           |           |           |
|----|----|---|-----------|-----------|-----------|
| 17 | 1  | 0 | 1.246737  | 3.430191  | -1.353861 |
| 18 | 1  | 0 | 1.240120  | 5.789412  | -0.579283 |
| 19 | 6  | 0 | 0.339637  | 7.000720  | 3.066651  |
| 20 | 1  | 0 | 1.760824  | -0.447946 | -0.673438 |
| 21 | 1  | 0 | -1.203351 | 0.892411  | 1.031784  |
| 22 | 1  | 0 | -1.262572 | 2.135665  | -1.104235 |
| 23 | 1  | 0 | -1.136388 | 0.626606  | -1.991824 |
| 24 | 16 | 0 | -0.709664 | -2.224080 | -0.856258 |
| 25 | 16 | 0 | -0.781666 | -1.462935 | 2.030502  |
| 26 | 1  | 0 | 3.309287  | 1.625119  | -1.460999 |
| 27 | 1  | 0 | 3.209413  | 2.108178  | 0.224716  |
| 28 | 16 | 0 | 5.115629  | -0.356177 | -1.461736 |
| 29 | 16 | 0 | 4.933645  | 0.319177  | 1.472803  |
| 30 | 8  | 0 | -0.270934 | -2.833277 | 2.077306  |
| 31 | 8  | 0 | -0.122677 | -0.397211 | 2.789948  |
| 32 | 8  | 0 | -1.846254 | -3.098331 | -0.554869 |
| 33 | 8  | 0 | -0.653373 | -1.480107 | -2.117471 |
| 34 | 8  | 0 | 5.955584  | -1.419299 | -0.916267 |
| 35 | 8  | 0 | 4.082283  | -0.645462 | -2.462612 |
| 36 | 8  | 0 | 6.386517  | 0.466789  | 1.381653  |
| 37 | 8  | 0 | 4.120160  | 1.299709  | 2.190099  |
| 38 | 1  | 0 | 0.417687  | 8.089224  | 3.094392  |
| 39 | 1  | 0 | -0.687773 | 6.704356  | 3.316101  |
| 40 | 1  | 0 | 1.028754  | 6.569494  | 3.804896  |
| 41 | 6  | 0 | 6.158026  | 0.934775  | -2.148049 |
| 42 | 6  | 0 | 5.751169  | 1.564101  | -3.327716 |
| 43 | 6  | 0 | 7.360149  | 1.263937  | -1.514215 |
| 44 | 6  | 0 | 6.564922  | 2.556240  | -3.877035 |
| 45 | 1  | 0 | 4.827114  | 1.263660  | -3.808593 |
| 46 | 6  | 0 | 8.160349  | 2.257248  | -2.077062 |
| 47 | 1  | 0 | 7.648745  | 0.762963  | -0.598014 |
| 48 | 6  | 0 | 7.764538  | 2.902546  | -3.252358 |
| 49 | 1  | 0 | 6.262289  | 3.052006  | -4.794822 |
| 50 | 1  | 0 | 9.096112  | 2.526265  | -1.595915 |
| 51 | 1  | 0 | 8.395498  | 3.674712  | -3.683837 |
| 52 | 6  | 0 | 4.563488  | -1.309233 | 2.110099  |
| 53 | 6  | 0 | 5.571467  | -2.274960 | 2.127475  |
| 54 | 6  | 0 | 3.283670  | -1.559287 | 2.610974  |
| 55 | 6  | 0 | 5.280901  | -3.529745 | 2.662155  |
| 56 | 1  | 0 | 6.551039  | -2.042864 | 1.728078  |
| 57 | 6  | 0 | 3.007707  | -2.823440 | 3.132102  |
| 58 | 1  | 0 | 2.521695  | -0.787128 | 2.603546  |
| 59 | 6  | 0 | 4.003889  | -3.802879 | 3.158750  |
| 60 | 1  | 0 | 6.053466  | -4.292973 | 2.688496  |

|     |    |   |           |           |           |
|-----|----|---|-----------|-----------|-----------|
| 61  | 1  | 0 | 2.011440  | -3.037547 | 3.503765  |
| 62  | 1  | 0 | 3.783594  | -4.784298 | 3.570312  |
| 63  | 6  | 0 | -2.496886 | -1.515101 | 2.571605  |
| 64  | 6  | 0 | -3.304731 | -2.594244 | 2.198295  |
| 65  | 6  | 0 | -2.933261 | -0.548509 | 3.479871  |
| 66  | 6  | 0 | -4.577627 | -2.700637 | 2.758250  |
| 67  | 1  | 0 | -2.943339 | -3.327072 | 1.487505  |
| 68  | 6  | 0 | -4.208675 | -0.672118 | 4.032909  |
| 69  | 1  | 0 | -2.282305 | 0.272207  | 3.753543  |
| 70  | 6  | 0 | -5.025562 | -1.747538 | 3.678992  |
| 71  | 1  | 0 | -5.213778 | -3.537132 | 2.483397  |
| 72  | 1  | 0 | -4.558402 | 0.071789  | 4.742276  |
| 73  | 1  | 0 | -6.012640 | -1.845495 | 4.122936  |
| 74  | 6  | 0 | 0.772805  | -3.240174 | -0.786885 |
| 75  | 6  | 0 | 1.872815  | -2.876431 | -1.567314 |
| 76  | 6  | 0 | 0.741825  | -4.444598 | -0.077835 |
| 77  | 6  | 0 | 2.987193  | -3.716878 | -1.593710 |
| 78  | 1  | 0 | 1.867716  | -1.969362 | -2.158386 |
| 79  | 6  | 0 | 1.856328  | -5.278565 | -0.126994 |
| 80  | 1  | 0 | -0.132768 | -4.713520 | 0.498407  |
| 81  | 6  | 0 | 2.979654  | -4.911911 | -0.873801 |
| 82  | 1  | 0 | 3.853542  | -3.423828 | -2.176411 |
| 83  | 1  | 0 | 1.845680  | -6.216777 | 0.420312  |
| 84  | 1  | 0 | 3.848863  | -5.563183 | -0.899410 |
| 85  | 7  | 0 | -2.986846 | 0.895825  | -1.057006 |
| 86  | 16 | 0 | -3.693855 | 0.805583  | -2.695471 |
| 87  | 16 | 0 | -3.742707 | 2.058277  | 0.035297  |
| 88  | 8  | 0 | -3.631912 | 3.419863  | -0.485885 |
| 89  | 8  | 0 | -3.148066 | 1.739123  | 1.340806  |
| 90  | 8  | 0 | -4.713933 | 1.850377  | -2.795224 |
| 91  | 8  | 0 | -2.572373 | 0.751122  | -3.631381 |
| 92  | 6  | 0 | -5.465391 | 1.578129  | 0.097731  |
| 93  | 6  | 0 | -6.424768 | 2.470602  | -0.383384 |
| 94  | 6  | 0 | -5.814688 | 0.384950  | 0.732242  |
| 95  | 6  | 0 | -7.773142 | 2.147912  | -0.230873 |
| 96  | 1  | 0 | -6.108921 | 3.383957  | -0.873070 |
| 97  | 6  | 0 | -7.167371 | 0.073315  | 0.870625  |
| 98  | 1  | 0 | -5.049971 | -0.284613 | 1.107560  |
| 99  | 6  | 0 | -8.142781 | 0.952448  | 0.393033  |
| 100 | 1  | 0 | -8.533729 | 2.829866  | -0.599568 |
| 101 | 1  | 0 | -7.455532 | -0.853902 | 1.356934  |
| 102 | 1  | 0 | -9.195074 | 0.707406  | 0.509497  |
| 103 | 6  | 0 | -4.532402 | -0.779216 | -2.726194 |
| 104 | 6  | 0 | -5.919321 | -0.808500 | -2.560948 |

|     |   |   |           |           |           |
|-----|---|---|-----------|-----------|-----------|
| 105 | 6 | 0 | -3.796554 | -1.933182 | -3.001182 |
| 106 | 6 | 0 | -6.578411 | -2.034406 | -2.653709 |
| 107 | 1 | 0 | -6.466028 | 0.109545  | -2.381429 |
| 108 | 6 | 0 | -4.471064 | -3.151147 | -3.084081 |
| 109 | 1 | 0 | -2.724571 | -1.876659 | -3.145073 |
| 110 | 6 | 0 | -5.856023 | -3.202365 | -2.910365 |
| 111 | 1 | 0 | -7.657172 | -2.073282 | -2.532269 |
| 112 | 1 | 0 | -3.909794 | -4.058293 | -3.285963 |
| 113 | 1 | 0 | -6.375374 | -4.154222 | -2.982719 |

-----  
 Thermal correction to Gibbs Free Energy= 0.742483  
 Sum of electronic and thermal Free Energies= -5385.007149  
 <S\*\*>2=0.000

#### 4a(Z)

| Center<br>Number | Atomic<br>Number | Atomic<br>Type | Coordinates (Angstroms) |           |           |
|------------------|------------------|----------------|-------------------------|-----------|-----------|
|                  |                  |                | X                       | Y         | Z         |
| 1                | 6                | 0              | 2.413700                | 3.729720  | -2.759143 |
| 2                | 6                | 0              | 1.658409                | 2.596036  | -2.447871 |
| 3                | 6                | 0              | 0.775787                | 2.574961  | -1.359046 |
| 4                | 6                | 0              | 0.673802                | 3.745402  | -0.581431 |
| 5                | 6                | 0              | 1.419184                | 4.879595  | -0.877454 |
| 6                | 6                | 0              | 2.300991                | 4.879882  | -1.968318 |
| 7                | 8                | 0              | 3.004132                | 6.033411  | -2.166030 |
| 8                | 6                | 0              | -0.041724               | 1.366892  | -1.017404 |
| 9                | 6                | 0              | -1.363065               | 1.532518  | -0.851009 |
| 10               | 6                | 0              | 0.799740                | 0.094436  | -0.813376 |
| 11               | 6                | 0              | 1.376009                | 0.212228  | 0.628728  |
| 12               | 7                | 0              | 0.151412                | -1.199784 | -1.268426 |
| 13               | 6                | 0              | -2.406496               | 0.515713  | -0.476119 |
| 14               | 7                | 0              | -3.566044               | 1.107662  | 0.250935  |
| 15               | 1                | 0              | 3.075226                | 3.704138  | -3.617454 |
| 16               | 1                | 0              | 1.742549                | 1.724090  | -3.087024 |
| 17               | 1                | 0              | 0.008820                | 3.755007  | 0.277506  |
| 18               | 1                | 0              | 1.340552                | 5.777531  | -0.272279 |
| 19               | 6                | 0              | 3.876476                | 6.105004  | -3.283205 |
| 20               | 1                | 0              | -1.762894               | 2.515522  | -1.082066 |
| 21               | 1                | 0              | 1.666006                | 0.188514  | -1.467537 |
| 22               | 1                | 0              | 1.709948                | 1.252618  | 0.705256  |
| 23               | 1                | 0              | 0.592276                | 0.079301  | 1.364874  |
| 24               | 16               | 0              | -0.208329               | -2.559276 | -0.219054 |

|    |    |   |           |           |           |
|----|----|---|-----------|-----------|-----------|
| 25 | 16 | 0 | 0.337084  | -1.478826 | -2.975963 |
| 26 | 1  | 0 | -2.799662 | 0.020173  | -1.369030 |
| 27 | 1  | 0 | -2.008481 | -0.256636 | 0.177549  |
| 28 | 16 | 0 | -4.728276 | 2.034607  | -0.638764 |
| 29 | 16 | 0 | -3.634271 | 0.970546  | 1.961276  |
| 30 | 8  | 0 | -0.390427 | -2.716388 | -3.250942 |
| 31 | 8  | 0 | -0.049560 | -0.222672 | -3.617833 |
| 32 | 8  | 0 | 0.799256  | -3.600774 | -0.431496 |
| 33 | 8  | 0 | -0.370066 | -1.920680 | 1.090463  |
| 34 | 8  | 0 | -4.981880 | 3.282712  | 0.078489  |
| 35 | 8  | 0 | -4.189738 | 2.036573  | -1.999470 |
| 36 | 8  | 0 | -4.973310 | 1.404748  | 2.350104  |
| 37 | 8  | 0 | -3.161451 | -0.380170 | 2.276277  |
| 38 | 1  | 0 | 4.314022  | 7.104712  | -3.257834 |
| 39 | 1  | 0 | 4.678098  | 5.357025  | -3.219725 |
| 40 | 1  | 0 | 3.333259  | 5.970828  | -4.227768 |
| 41 | 6  | 0 | -6.227497 | 1.051706  | -0.644933 |
| 42 | 6  | 0 | -6.374985 | 0.076697  | -1.635383 |
| 43 | 6  | 0 | -7.225799 | 1.303840  | 0.297429  |
| 44 | 6  | 0 | -7.549643 | -0.674494 | -1.667119 |
| 45 | 1  | 0 | -5.595512 | -0.072366 | -2.374521 |
| 46 | 6  | 0 | -8.396031 | 0.546026  | 0.248997  |
| 47 | 1  | 0 | -7.078148 | 2.067773  | 1.050238  |
| 48 | 6  | 0 | -8.556260 | -0.441329 | -0.726320 |
| 49 | 1  | 0 | -7.680931 | -1.433588 | -2.432812 |
| 50 | 1  | 0 | -9.182848 | 0.729455  | 0.974773  |
| 51 | 1  | 0 | -9.471230 | -1.026592 | -0.757723 |
| 52 | 6  | 0 | -2.420380 | 2.127371  | 2.589484  |
| 53 | 6  | 0 | -2.678938 | 3.499485  | 2.507894  |
| 54 | 6  | 0 | -1.254003 | 1.624356  | 3.168835  |
| 55 | 6  | 0 | -1.730202 | 4.384159  | 3.019236  |
| 56 | 1  | 0 | -3.593308 | 3.858815  | 2.047378  |
| 57 | 6  | 0 | -0.314074 | 2.525298  | 3.674064  |
| 58 | 1  | 0 | -1.082927 | 0.555510  | 3.225735  |
| 59 | 6  | 0 | -0.552386 | 3.899128  | 3.599761  |
| 60 | 1  | 0 | -1.912838 | 5.453698  | 2.967145  |
| 61 | 1  | 0 | 0.598565  | 2.140536  | 4.118447  |
| 62 | 1  | 0 | 0.180153  | 4.597128  | 3.996080  |
| 63 | 6  | 0 | 2.081872  | -1.740251 | -3.326621 |
| 64 | 6  | 0 | 2.774128  | -2.805252 | -2.744597 |
| 65 | 6  | 0 | 2.678062  | -0.908074 | -4.277381 |
| 66 | 6  | 0 | 4.101548  | -3.017619 | -3.112511 |
| 67 | 1  | 0 | 2.293705  | -3.436207 | -2.006315 |
| 68 | 6  | 0 | 4.004930  | -1.140777 | -4.639613 |

|     |    |   |           |           |           |
|-----|----|---|-----------|-----------|-----------|
| 69  | 1  | 0 | 2.104968  | -0.106686 | -4.729305 |
| 70  | 6  | 0 | 4.715963  | -2.189665 | -4.055308 |
| 71  | 1  | 0 | 4.657808  | -3.831128 | -2.656533 |
| 72  | 1  | 0 | 4.480079  | -0.501135 | -5.377794 |
| 73  | 1  | 0 | 5.751350  | -2.363799 | -4.334794 |
| 74  | 6  | 0 | -1.807314 | -3.285748 | -0.630944 |
| 75  | 6  | 0 | -2.921558 | -2.881945 | 0.109743  |
| 76  | 6  | 0 | -1.870995 | -4.357545 | -1.526409 |
| 77  | 6  | 0 | -4.140367 | -3.529093 | -0.105506 |
| 78  | 1  | 0 | -2.844749 | -2.109952 | 0.865730  |
| 79  | 6  | 0 | -3.093719 | -4.995565 | -1.722575 |
| 80  | 1  | 0 | -0.985586 | -4.677325 | -2.057639 |
| 81  | 6  | 0 | -4.229206 | -4.575957 | -1.023602 |
| 82  | 1  | 0 | -5.012292 | -3.216505 | 0.461324  |
| 83  | 1  | 0 | -3.156296 | -5.824899 | -2.421022 |
| 84  | 1  | 0 | -5.179270 | -5.078862 | -1.183201 |
| 85  | 7  | 0 | 2.495940  | -0.684860 | 1.031797  |
| 86  | 16 | 0 | 2.467097  | -1.219516 | 2.726772  |
| 87  | 16 | 0 | 4.057609  | -0.346080 | 0.329379  |
| 88  | 8  | 0 | 3.756887  | -0.047223 | -1.072803 |
| 89  | 8  | 0 | 4.931901  | -1.460793 | 0.682198  |
| 90  | 8  | 0 | 3.787693  | -0.932453 | 3.286988  |
| 91  | 8  | 0 | 1.276896  | -0.612502 | 3.328932  |
| 92  | 6  | 0 | 4.702383  | 1.170715  | 1.046092  |
| 93  | 6  | 0 | 4.353014  | 2.387399  | 0.450718  |
| 94  | 6  | 0 | 5.583632  | 1.107320  | 2.128758  |
| 95  | 6  | 0 | 4.877746  | 3.568866  | 0.976825  |
| 96  | 1  | 0 | 3.708567  | 2.410655  | -0.420439 |
| 97  | 6  | 0 | 6.106900  | 2.296712  | 2.634196  |
| 98  | 1  | 0 | 5.841280  | 0.149702  | 2.561714  |
| 99  | 6  | 0 | 5.750404  | 3.523087  | 2.065929  |
| 100 | 1  | 0 | 4.607792  | 4.518524  | 0.524394  |
| 101 | 1  | 0 | 6.794947  | 2.263609  | 3.473894  |
| 102 | 1  | 0 | 6.161182  | 4.444819  | 2.469092  |
| 103 | 6  | 0 | 2.254728  | -2.995578 | 2.678897  |
| 104 | 6  | 0 | 3.288744  | -3.796072 | 2.187318  |
| 105 | 6  | 0 | 1.094733  | -3.536093 | 3.234489  |
| 106 | 6  | 0 | 3.138722  | -5.180386 | 2.244602  |
| 107 | 1  | 0 | 4.178763  | -3.343764 | 1.764905  |
| 108 | 6  | 0 | 0.967708  | -4.924439 | 3.290967  |
| 109 | 1  | 0 | 0.313802  | -2.882302 | 3.601921  |
| 110 | 6  | 0 | 1.983742  | -5.743022 | 2.794988  |
| 111 | 1  | 0 | 3.928227  | -5.820215 | 1.861136  |
| 112 | 1  | 0 | 0.071330  | -5.362800 | 3.719772  |



113            1            0            1.876779    -6.823507    2.837952

-----  
Thermal correction to Gibbs Free Energy=            0.763910  
Sum of electronic and thermal Free Energies=        -5384.868213  
<S\*\*>2=0.000

## 7. References

1. C. G. Espino, K. W. Fiori, M. Kim and J. Du Bois, Expanding the Scope of C–H Amination through Catalyst Design, *J. Am. Chem. Soc.*, 2004, **126**, 15378-15379.
2. X. Liu, Z. Wang, Q. Wang and Y. Wang, Rhodium(II)-Catalyzed C(sp<sup>3</sup>)–H Diamination of Arylcyclobutanes, *Angew. Chem., Int. Ed.*, 2022, **61**, e202205493.
3. S. I. Baker, M. Yaghoubi, S. L. Bidwell, S. L. Pierce, H. P. Hratchian and R. D. Baxter, Enhanced Reactivity for Aromatic Bromination via Halogen Bonding with Lactic Acid Derivatives, *J. Org. Chem.*, 2022, **87**, 8492-8502.
4. J. Buendia, G. Grelier, B. Darses, A. G. Jarvis, F. Taran and P. Dauban, The Multiple Facets of Iodine(III) Compounds in an Unprecedented Catalytic Auto-amination for Chiral Amine Synthesis, *Angew. Chem., Int. Ed.*, 2016, **55**, 7530-7533.
5. C. Simonin, M. Awale, M. Brand, R. van Deursen, J. Schwartz, M. Fine, G. Kovacs, P. Häfliger, G. Gyimesi, A. Sithampari, R.-P. Charles, M. A. Hediger and J.-L. Reymond, Optimization of TRPV6 Calcium Channel Inhibitors Using a 3D Ligand-Based Virtual Screening Method, *Angew. Chem., Int. Ed.*, 2015, **54**, 14748-14752.
6. M. R. Witten and E. N. Jacobsen, A Simple Primary Amine Catalyst for Enantioselective  $\alpha$ -Hydroxylations and  $\alpha$ -Fluorinations of Branched Aldehydes, *Org. Lett.*, 2015, **17**, 2772-2775.
7. P. Lu, H. Wang, Y. Mao, X. Hong and Z. Lu, Cobalt-Catalyzed Enantioconvergent Hydrogenation of Minimally Functionalized Isomeric Olefins, *J. Am. Chem. Soc.*, 2022, **144**, 17359-17364.
8. Y. Yamamoto and K. Itonaga, Versatile Friedel–Crafts-Type Alkylation of Benzene Derivatives Using a Molybdenum Complex/ortho-Chloranil Catalytic System, *Chem. - Eur. J.*, 2008, **14**, 10705-10715.
9. M. Biosca, E. Salomó, P. de la Cruz-Sánchez, A. Riera, X. Verdaguer, O. Pàmies

- and M. Diéguez, Extending the Substrate Scope in the Hydrogenation of Unfunctionalized Tetrasubstituted Olefins with Ir-P Stereogenic Aminophosphine–Oxazoline Catalysts, *Org. Lett.*, 2019, **21**, 807-811.
10. G. Cahiez, L. Foulgoc and A. Moyeux, Iron-Catalyzed Oxidative Heterocoupling Between Aliphatic and Aromatic Organozinc Reagents: A Novel Pathway for Functionalized Aryl–Alkyl Cross-Coupling Reactions, *Angew. Chem., Int. Ed.*, 2009, **48**, 2969-2972.
  11. J. Barluenga, L. Florentino, F. Aznar and C. Valdés, Synthesis of Polysubstituted Olefins by Pd-Catalyzed Cross-Coupling Reaction of Tosylhydrazones and Aryl Nonaflates, *Org. Lett.*, 2011, **13**, 510-513.
  12. A. D. Becke, Density-functional thermochemistry. III. The role of exact exchange, *J. Chem. Phys.*, 1993, **98**, 5648-5652.
  13. A. D. Becke, Density-functional thermochemistry. IV. A new dynamical correlation functional and implications for exact-exchange mixing, *J. Chem. Phys.*, 1996, **104**, 1040-1046.
  14. M. Dupuis, J. Rys and H. F. King, Evaluation of Molecular Integrals Over Gaussian Basis Functions, *J. Chem. Phys.*, 1976, **65**, 111-116.
  15. P. J. Hay and W. R. Wadt, Ab Initio Effective Core Potentials for Molecular Calculations. Potentials for The Transition Metal Atoms Sc to Hg, *J. Chem. Phys.*, 1985, **82**, 270-283.
  16. P. J. Hay and W. R. Wadt, Ab Initio Effective Core Potentials for Molecular Calculations. Potentials for K to Au Including The Outermost Core Orbitals, *J. Chem. Phys.*, 1985, **82**, 299-310.
  17. R. Ditchfield, W. J. Hehre and J. A. Pople, Self-Consistent Molecular-Orbital Methods. IX. An Extended Gaussian-Type Basis for Molecular-Orbital Studies of Organic Molecules, *J. Chem. Phys.*, 1971, **54**, 724-728.
  18. W. J. Hehre, R. Ditchfield and J. A. Pople, Self—Consistent Molecular Orbital Methods. XII. Further Extensions of Gaussian—Type Basis Sets for Use in Molecular Orbital Studies of Organic Molecules, *J. Chem. Phys.*, 1972, **56**, 2257-2261.

19. G. A. Petersson, A. Bennett, T. G. Tensfeldt, M. A. Al-Laham, W. A. Shirley and J. Mantzaris, A complete Basis Set Model Chemistry. I. The Total Energies of Closed-Shell Atoms and Hydrides of The First-Row Elements, *J. Chem. Phys.*, 1988, **89**, 2193-2218.
20. G. A. Petersson and M. A. Al-Laham, A Complete Basis Set Model Chemistry. II. Open-Shell Systems and The Total Energies of The First-Row Atoms, *J. Chem. Phys.*, 1991, **94**, 6081-6090.
21. F. Weigend and R. Ahlrichs, Balanced Basis Sets of Split Valence, Triple Zeta Valence and Quadruple Zeta Valence Quality for H to Rn: Design and Assessment of Accuracy, *Phys. Chem. Chem. Phys.*, 2005, **7**, 3297-3305.
22. Y. Zhao and D. G. Truhlar, The M06 suite of density functionals for main group thermochemistry, thermochemical kinetics, noncovalent interactions, excited states, and transition elements: two new functionals and systematic testing of four M06-class functionals and 12 other functionals, *Theor. Chem. Acc.*, 2008, **120**, 215-241.
23. A. V. Marenich, C. J. Cramer and D. G. Truhlar, Universal Solvation Model Based on Solute Electron Density and on a Continuum Model of the Solvent Defined by the Bulk Dielectric Constant and Atomic Surface Tensions, *J. Phys. Chem. B.*, 2009, **113**, 6378-6396.
24. E. D. Glendening.; D. M. Hiatt.; F. Weinhold. in *Comp. Comput. Chem.* (First Edition), eds. M. Yáñez and R. J. Boyd, **2024**, pp. 406-421.
25. E. D. Glendening.; A. E. Reed.; J. E. Carpenter.; F. Weinhold. NBO Version 3.1.
26. M. J. Frisch, G. W. Trucks, H. B. Schlegel, G. E. Scuseria, M. A. Robb, J. R. Cheeseman, G. Scalmani, V. Barone, B. Mennucci, G. A. Petersson, H. Nakatsuji, M. Caricato, X. Li, H. P. Hratchian, A. F. Izmaylov, J. Bloino, G. Zheng, J. L. Sonnenberg, M. Hada, M. Ehara, K. Toyota, R. Fukuda, J. Hasegawa, M. Ishida, T. Nakajima, Y. Honda, O. Kitao, H. Nakai, T. Vreven, J. A. Montgomery, Jr., J. E. Peralta, F. Ogliaro, M. Bearpark, J. J. Heyd, E. Brothers, K. N. Kudin, V. N. Staroverov, R. Kobayashi, J. Normand, K. Raghavachari, A. Rendell, J. C. Burant, S. S. Iyengar, J. Tomasi, M. Cossi, N.

Rega, J. M. Millam, M. Klene, J. E. Knox, J. B. Cross, V. Bakken, C. Adamo, J. Jaramillo, R. Gomperts, R. E. Stratmann, O. Yazyev, A. J. Austin, R. Cammi, C. Pomelli, J. W. Ochterski, R. L. Martin, K. Morokuma, V. G. Zakrzewski, G. A. Voth, P. Salvador, J. J. Dannenberg, S. Dapprich, A. D. Daniels, Ö. Farkas, J. B. Foresman, J. V. Ortiz, J. Cioslowski, and D. J. Fox, Gaussian, Inc., Wallingford CT, 2009.

## 8. NMR Spectra of Compounds

<sup>1</sup>H NMR (400 MHz, CDCl<sub>3</sub>)

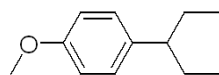

**1a**

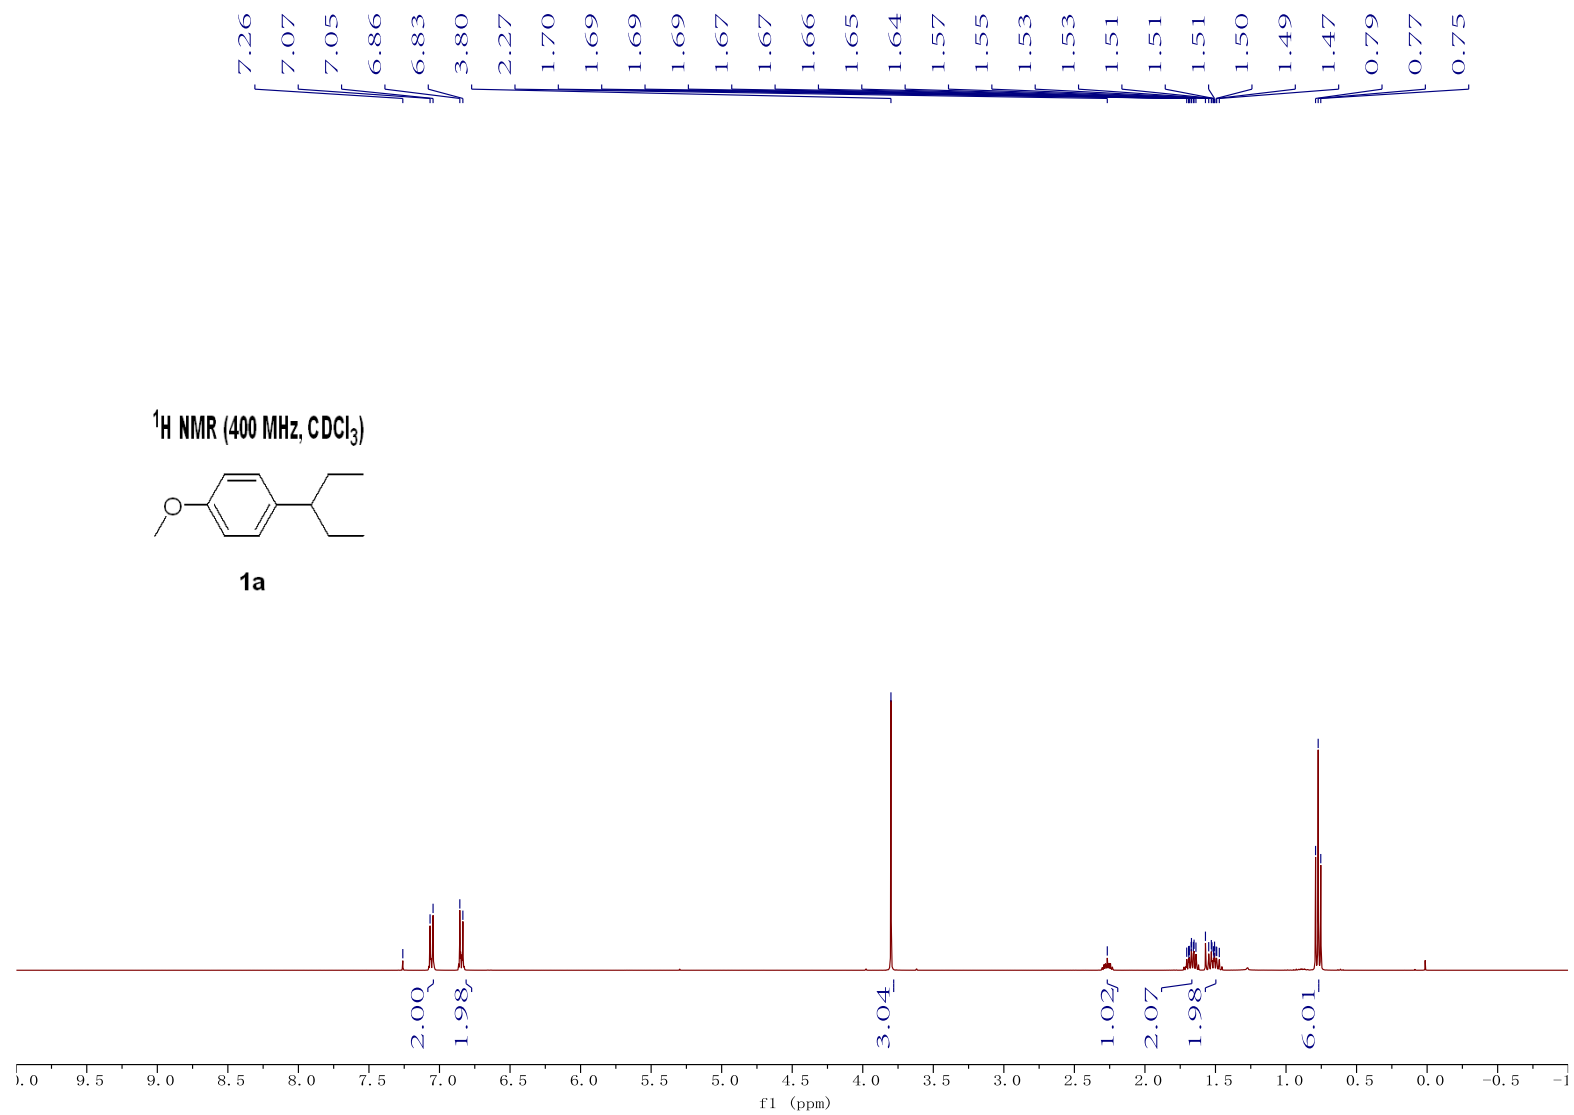

<sup>13</sup>C NMR (101 MHz, CDCl<sub>3</sub>)

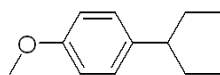

**1a**

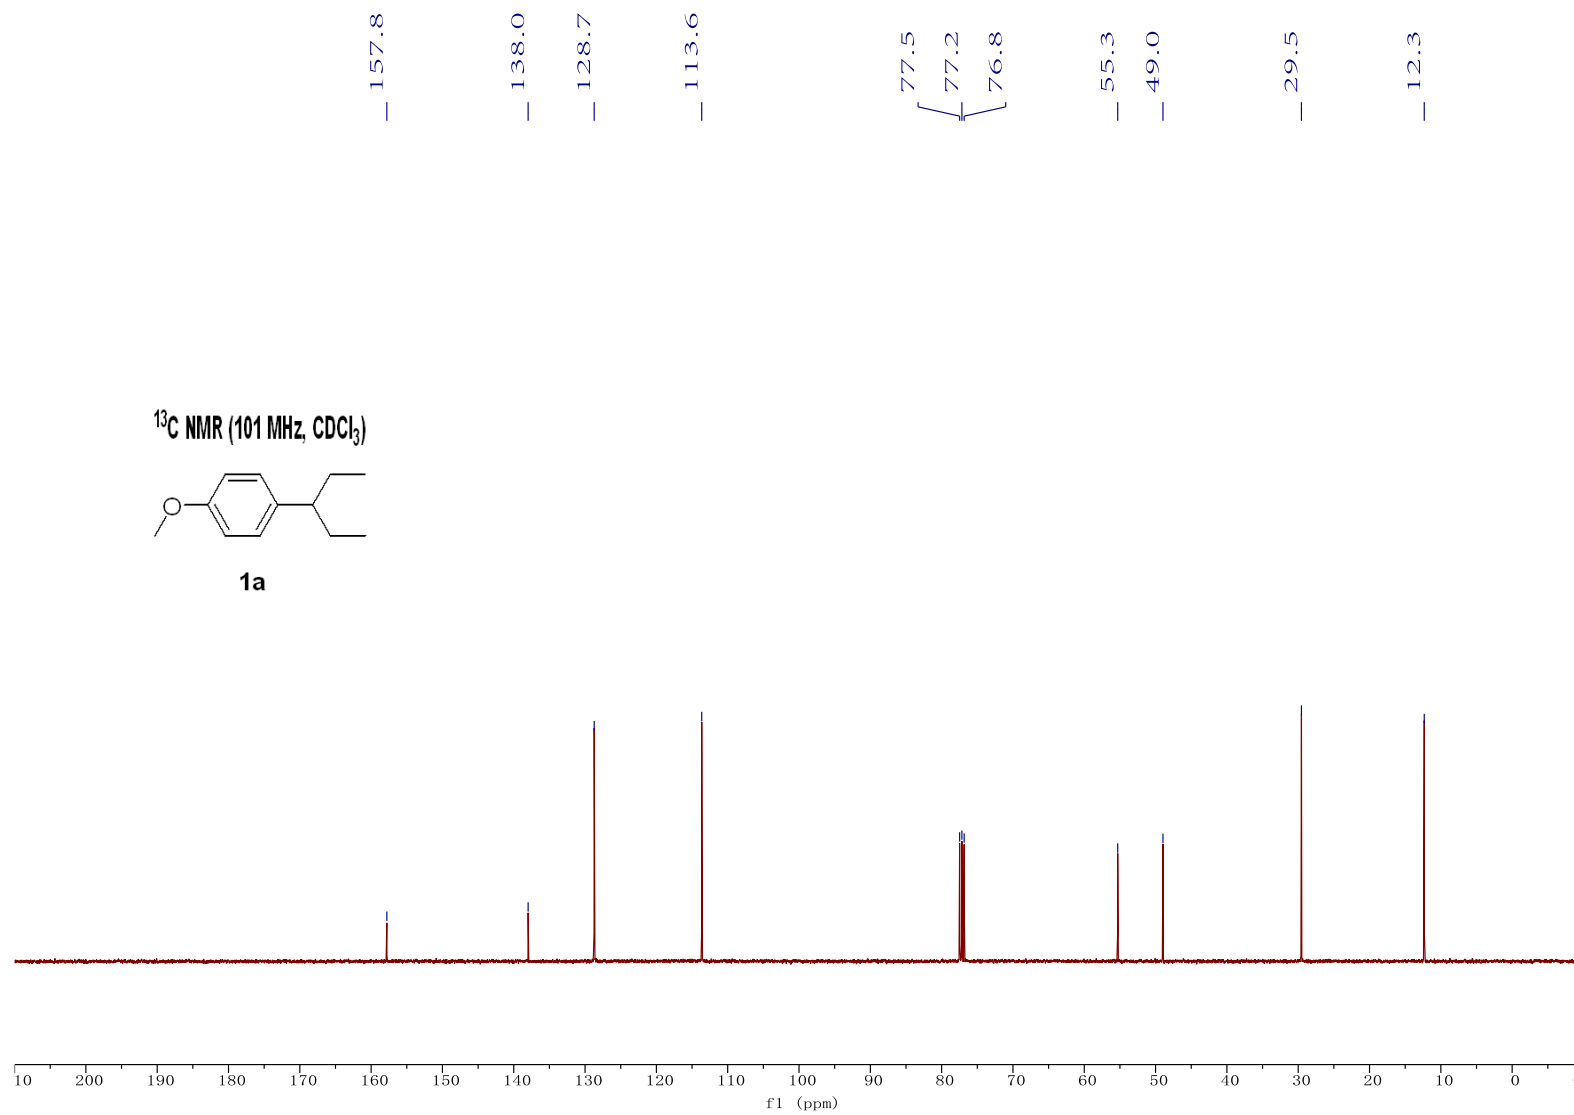



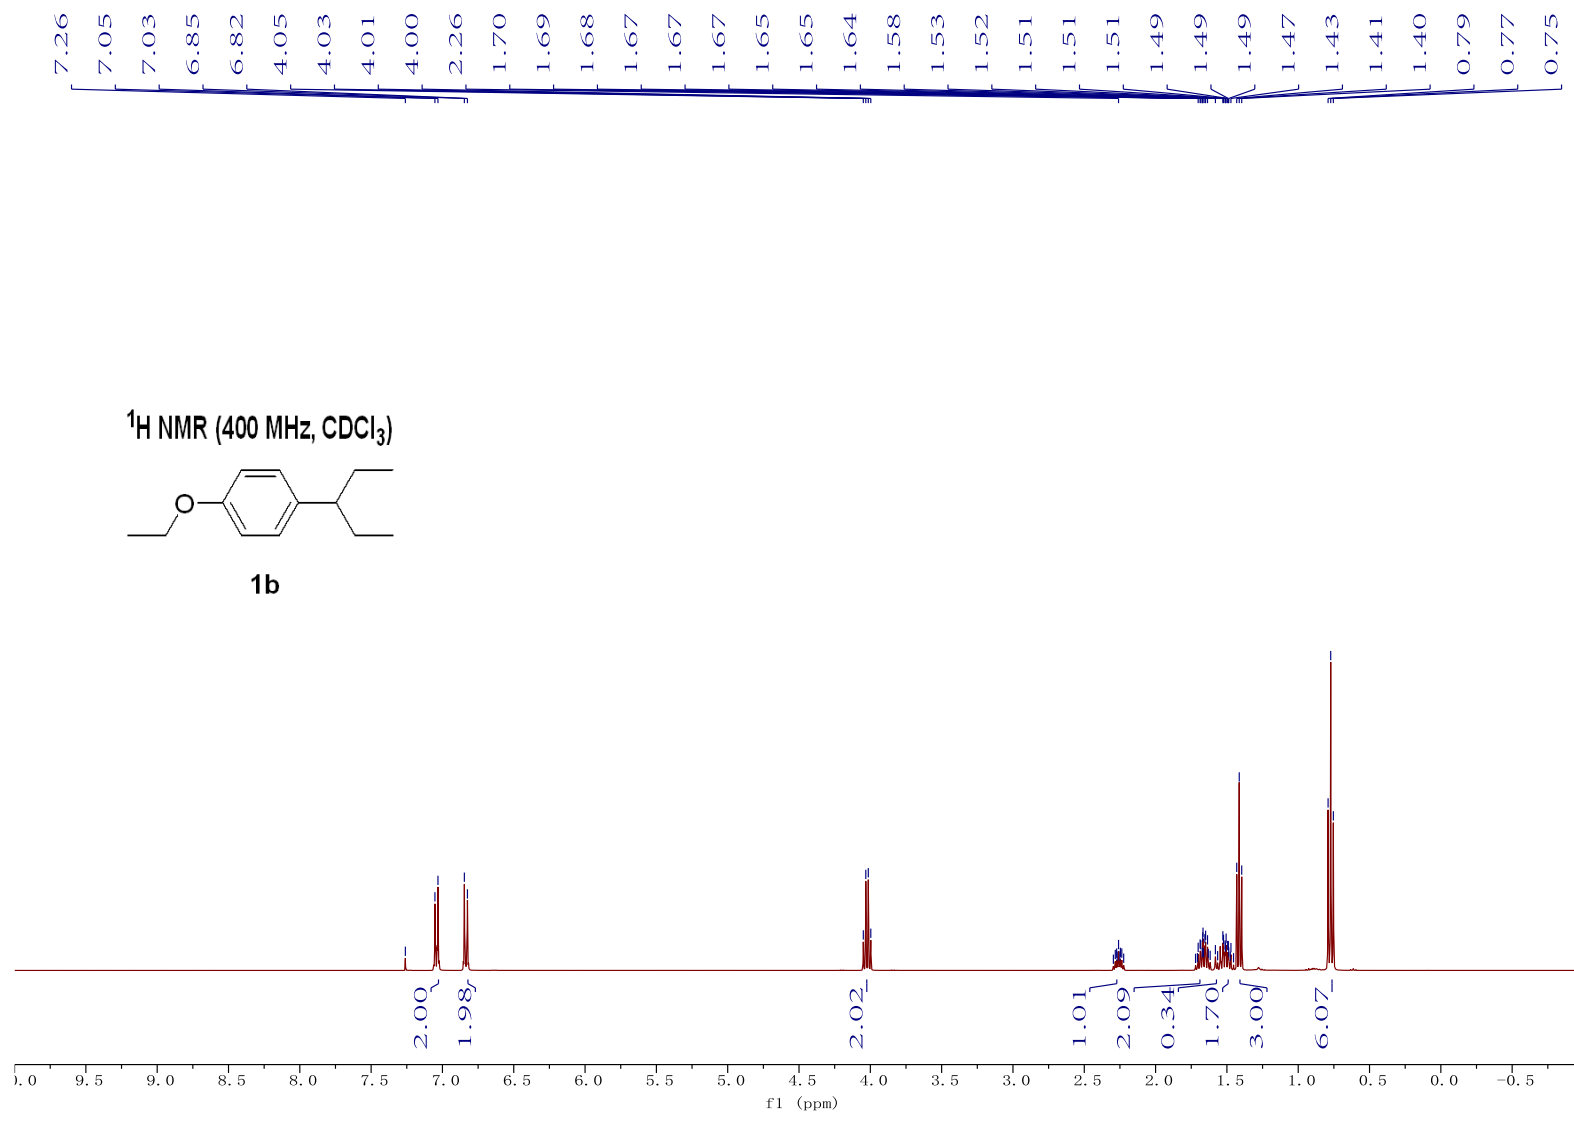

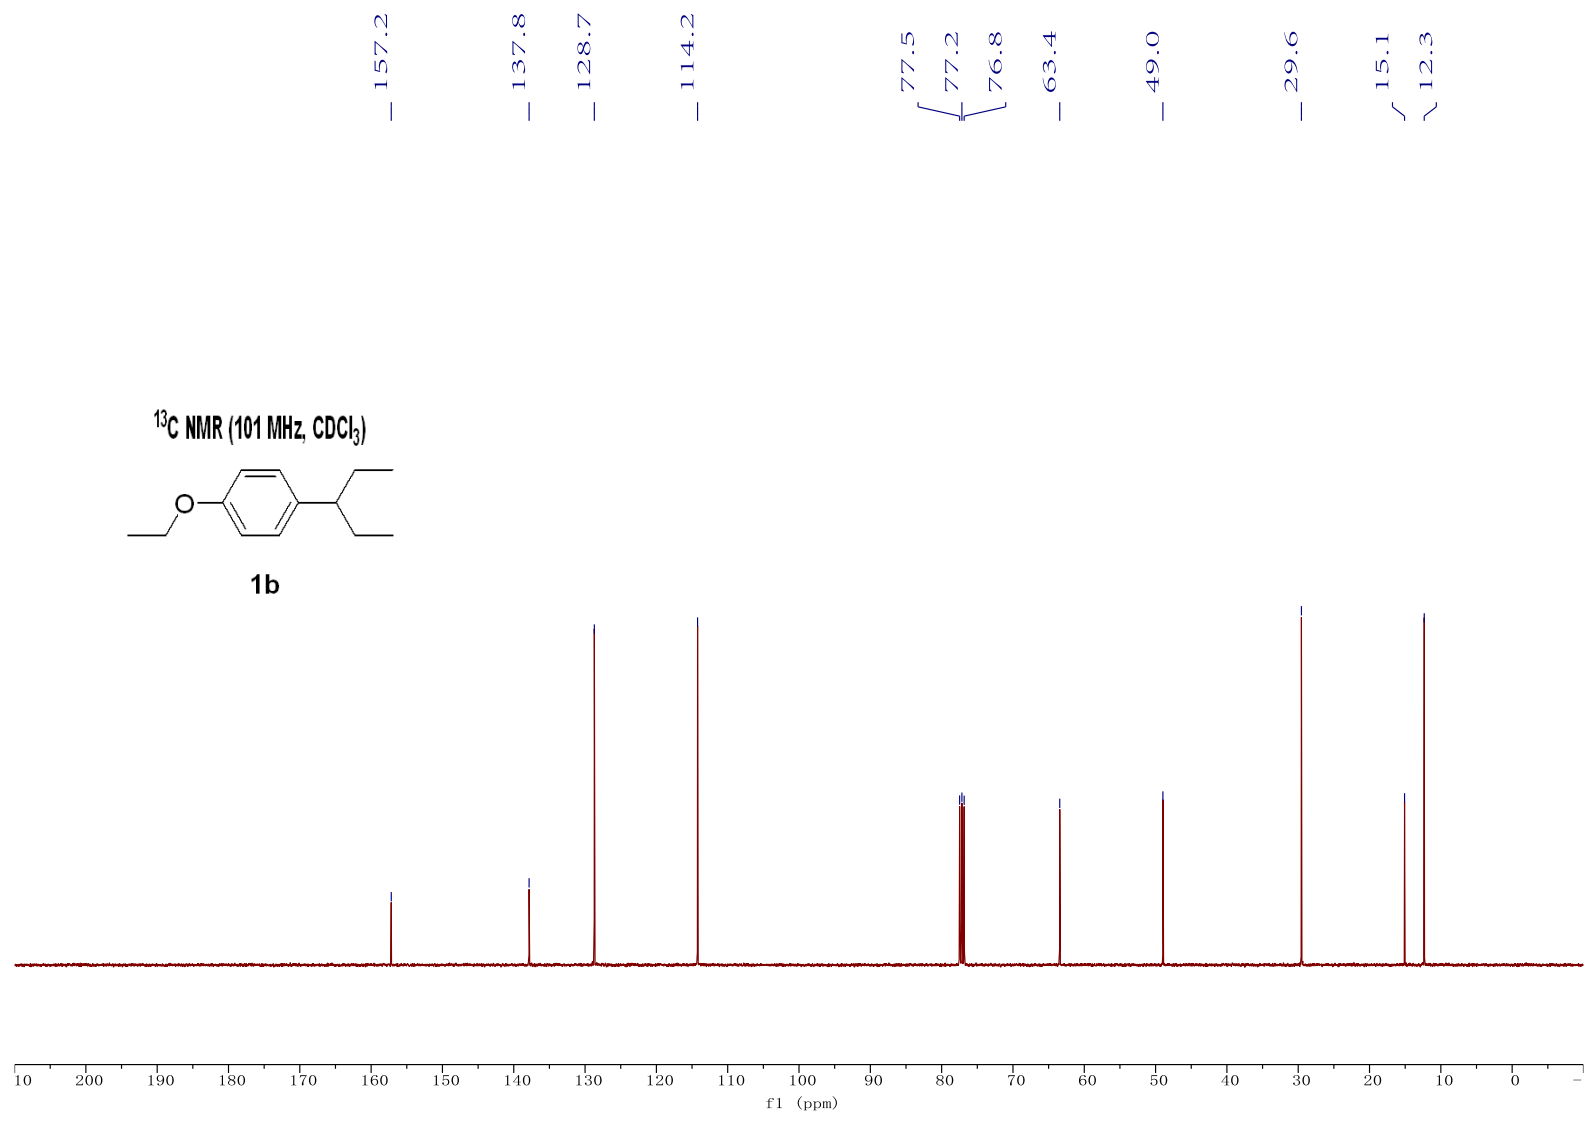

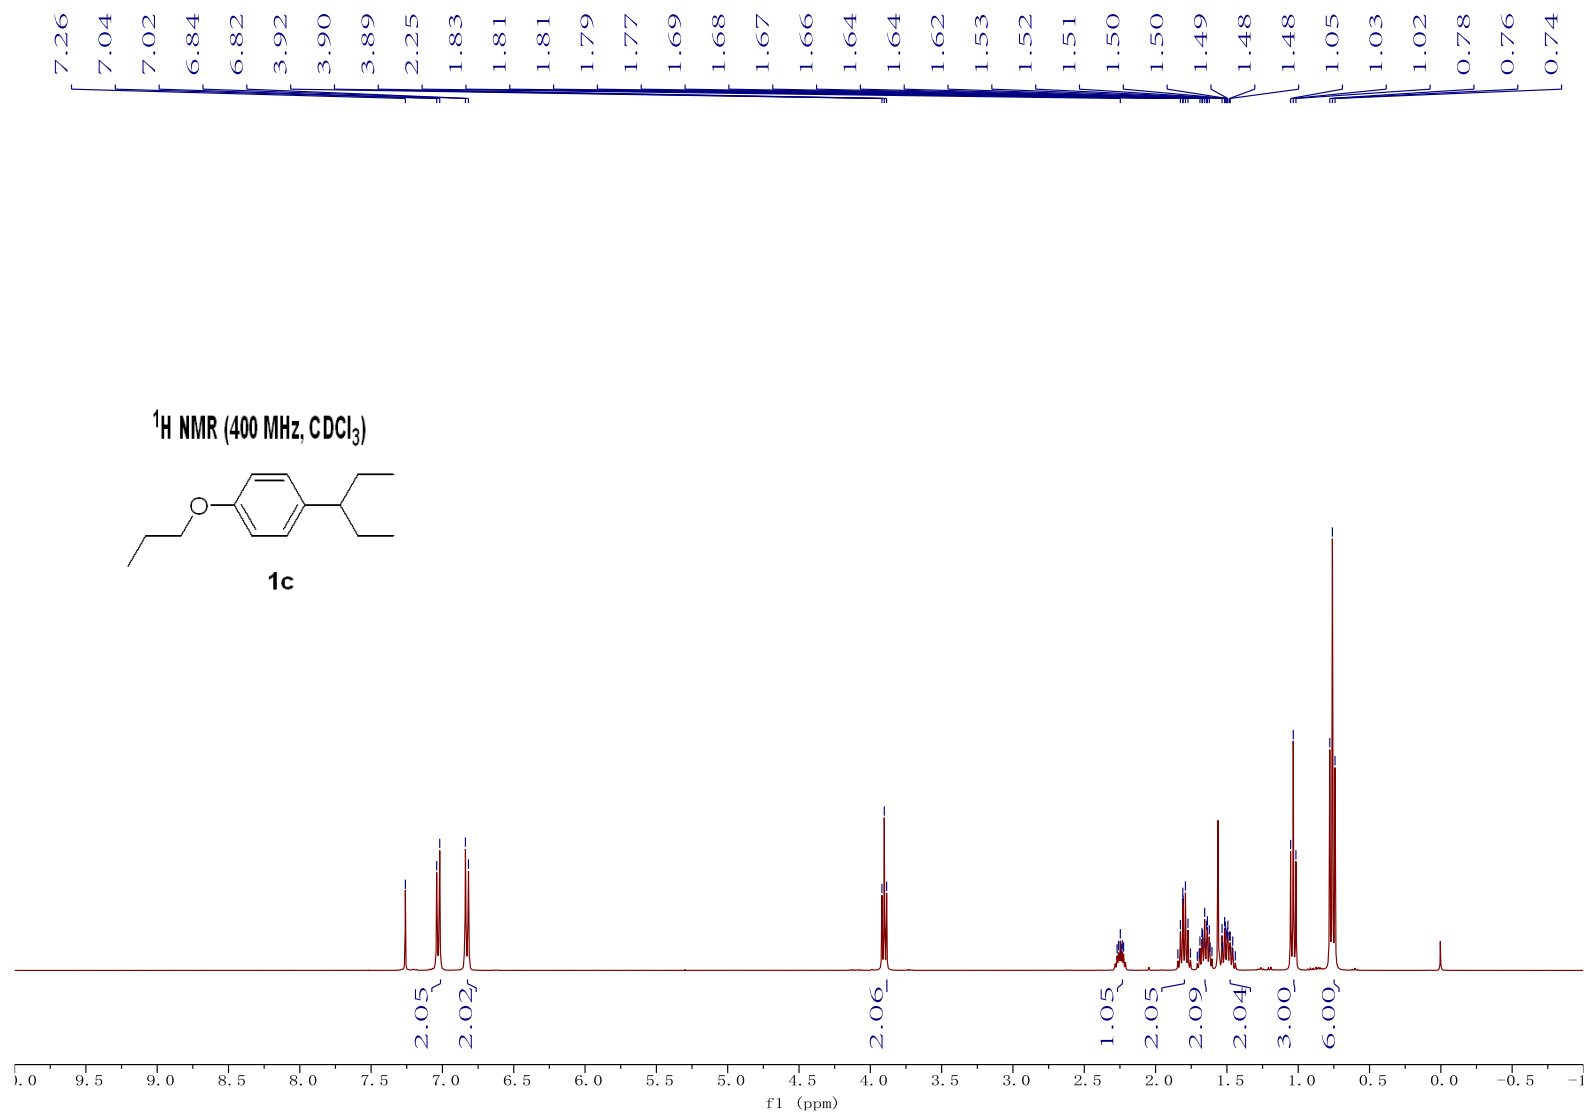

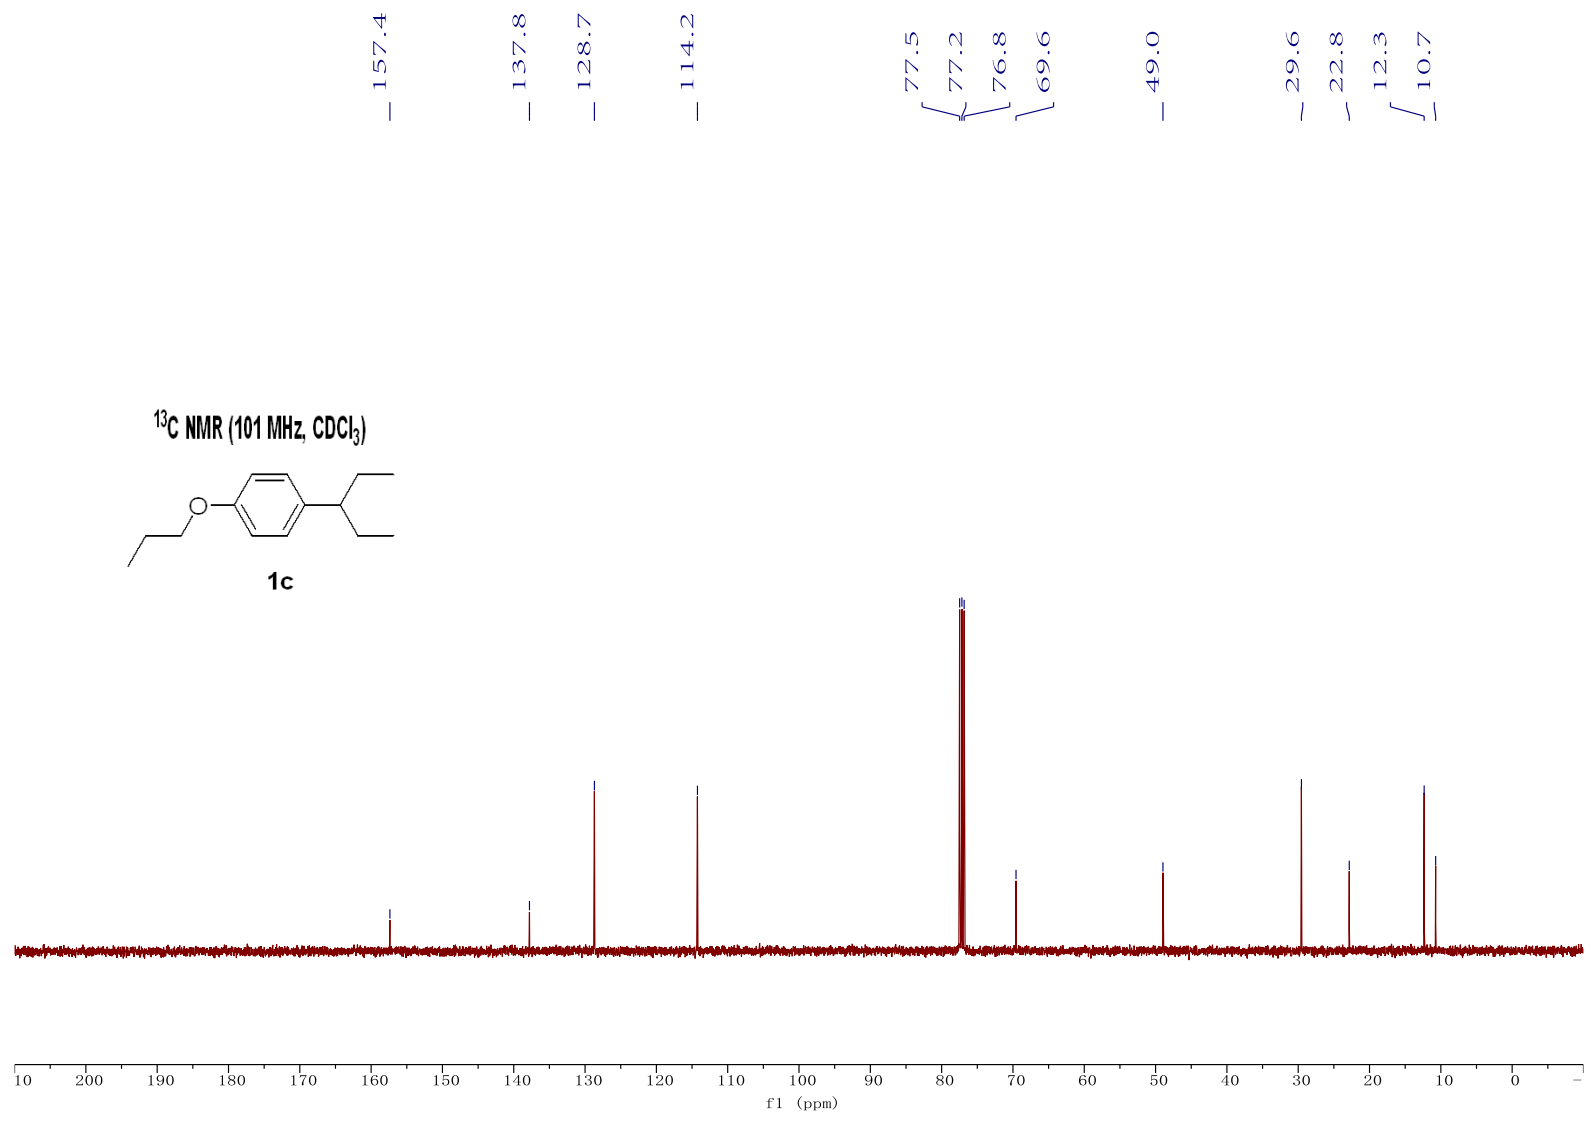

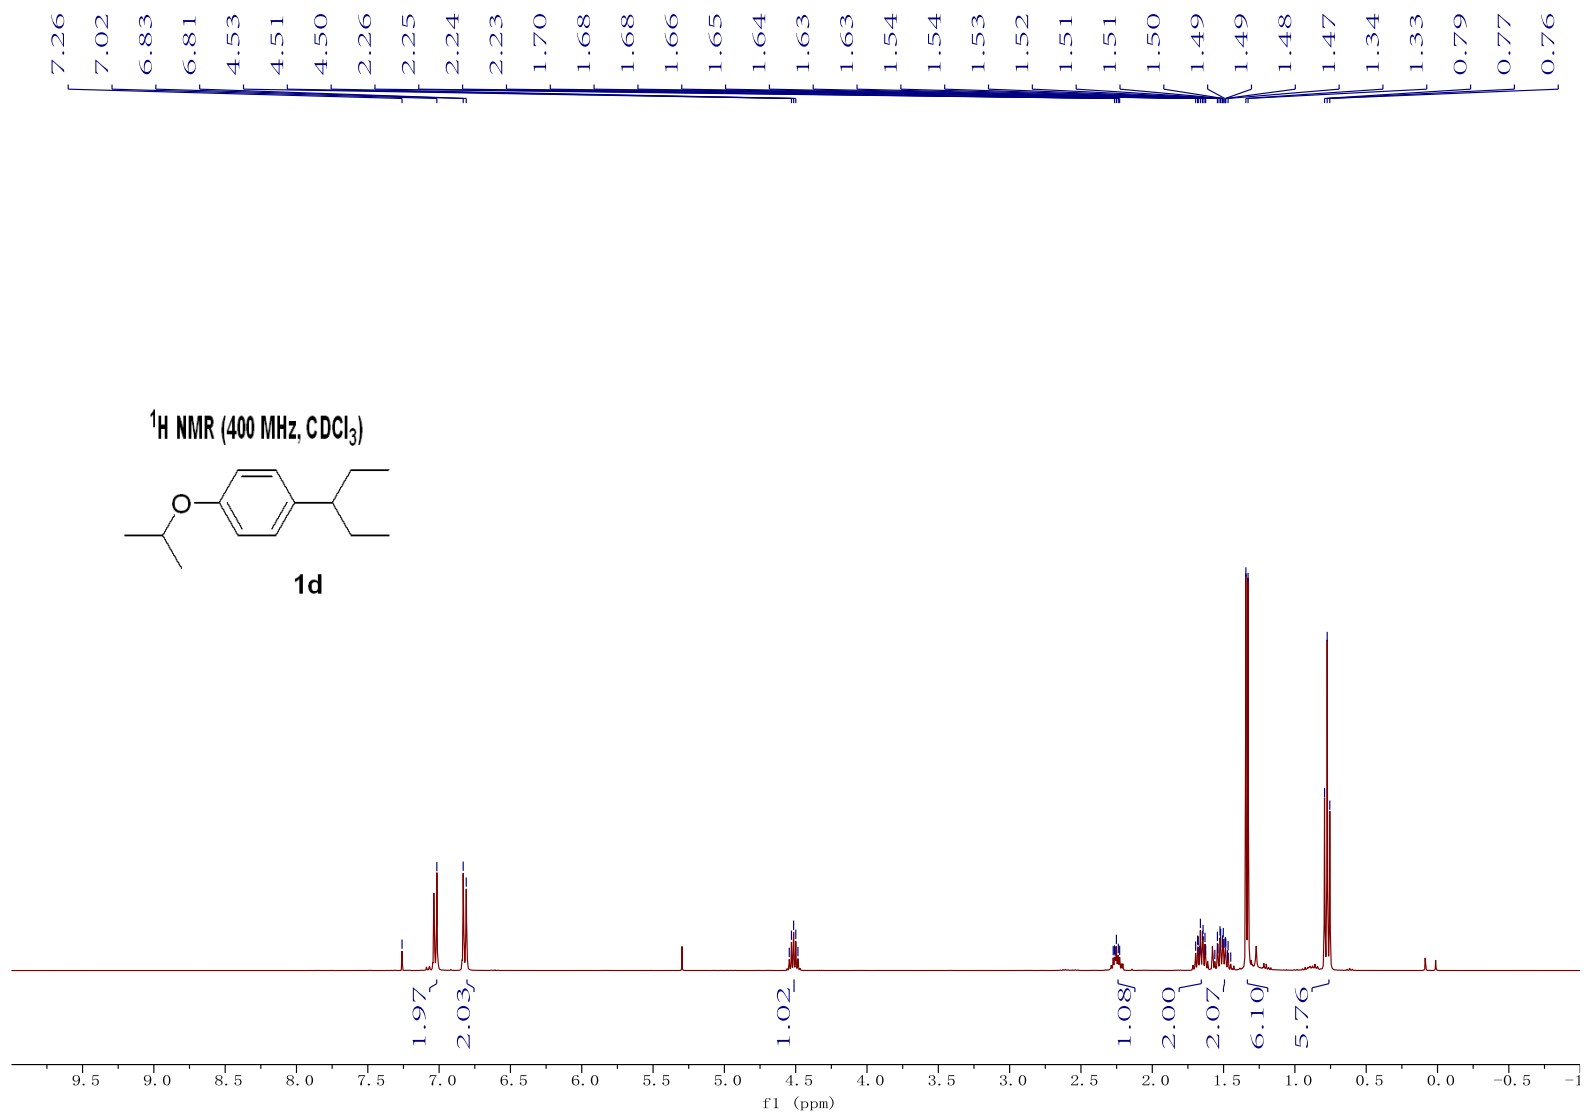

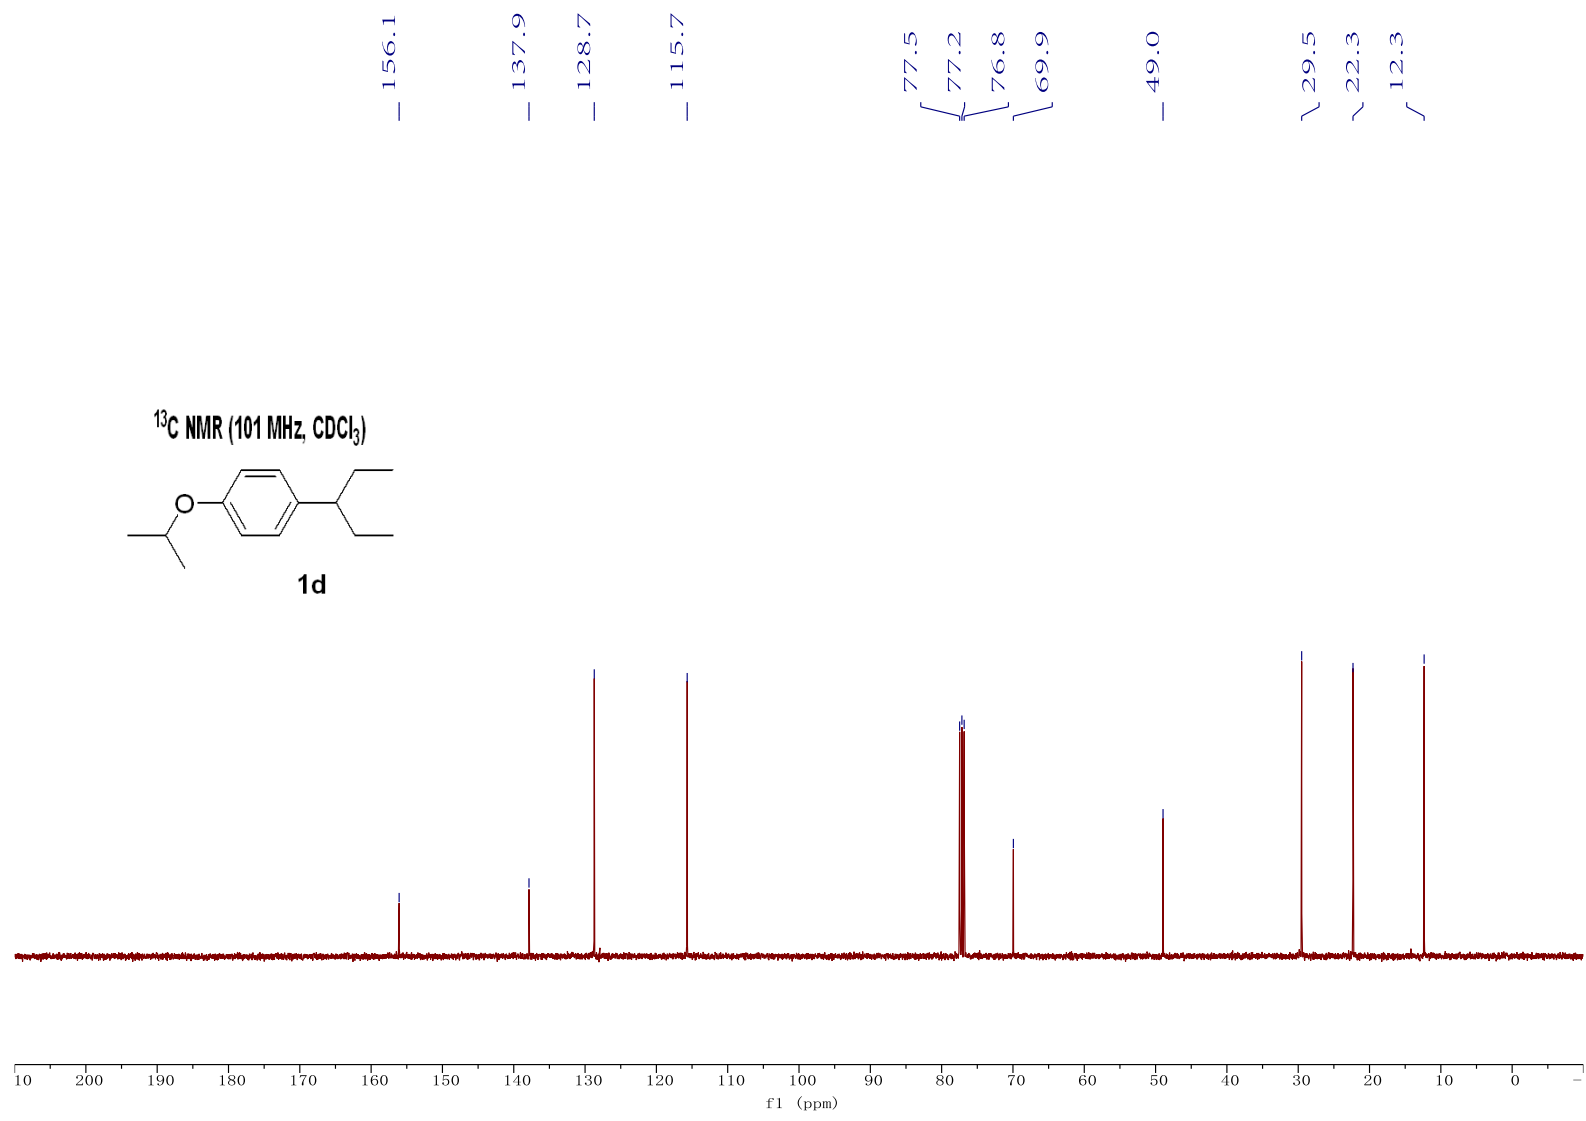

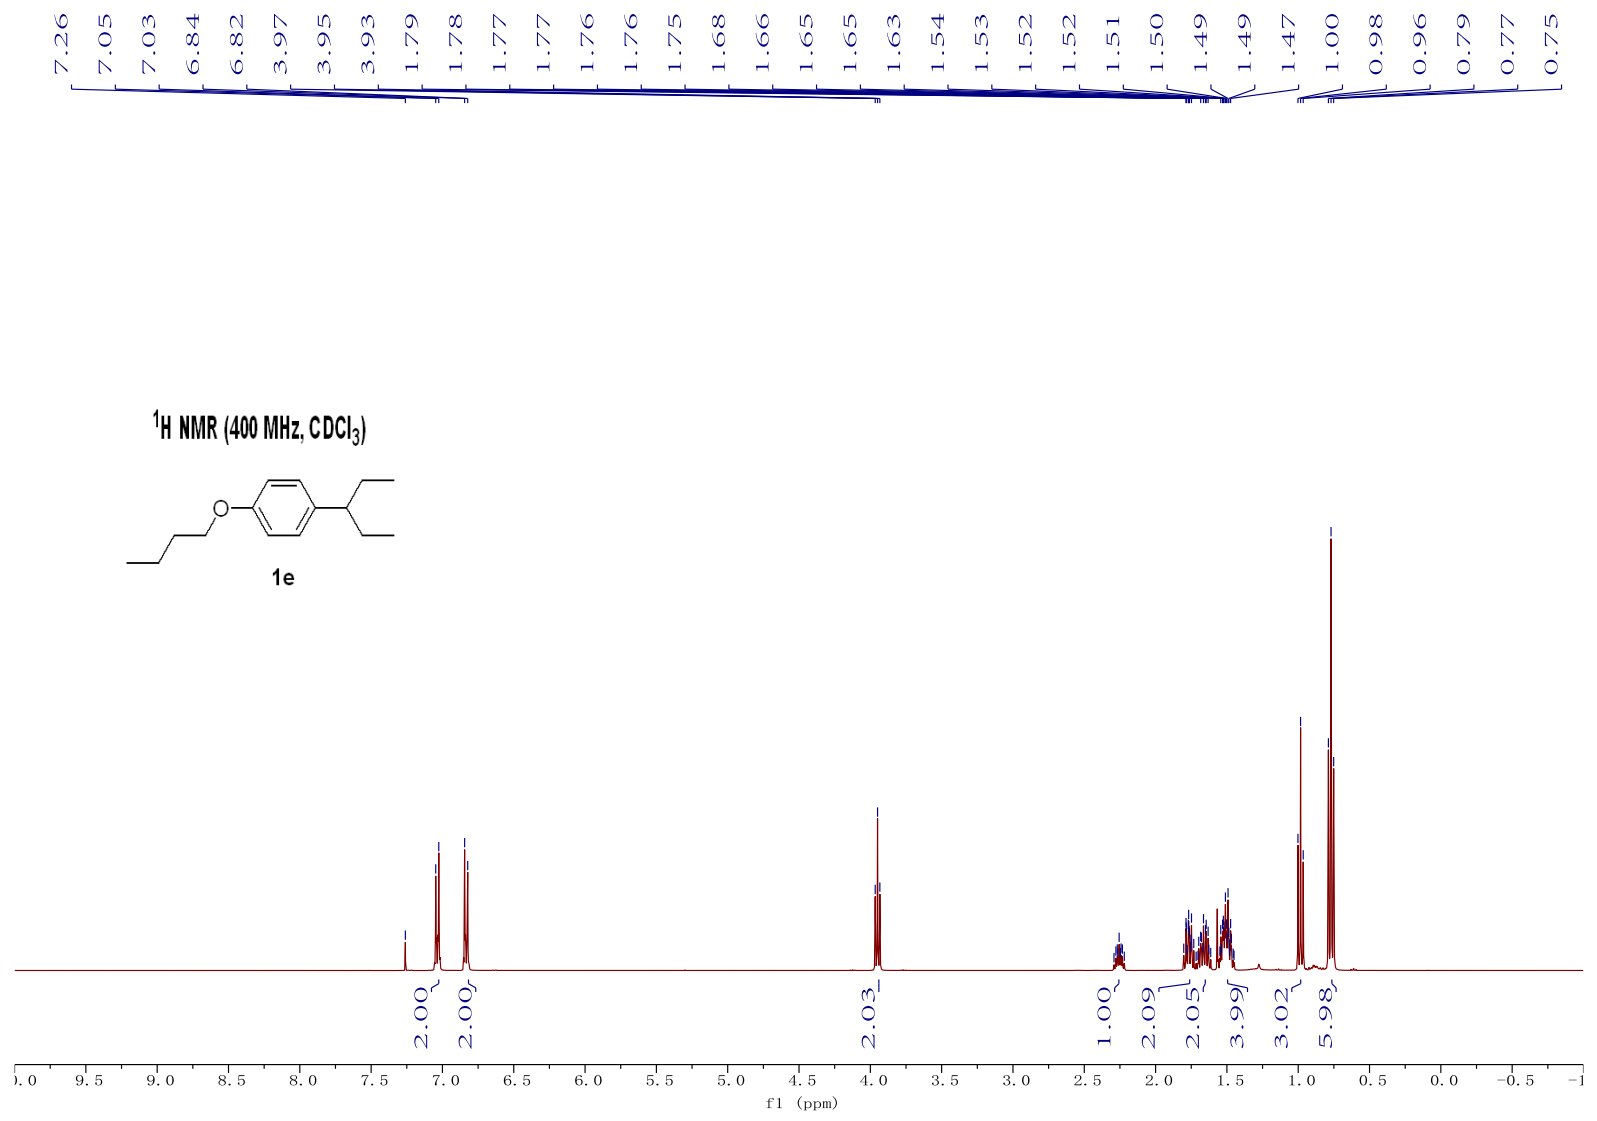

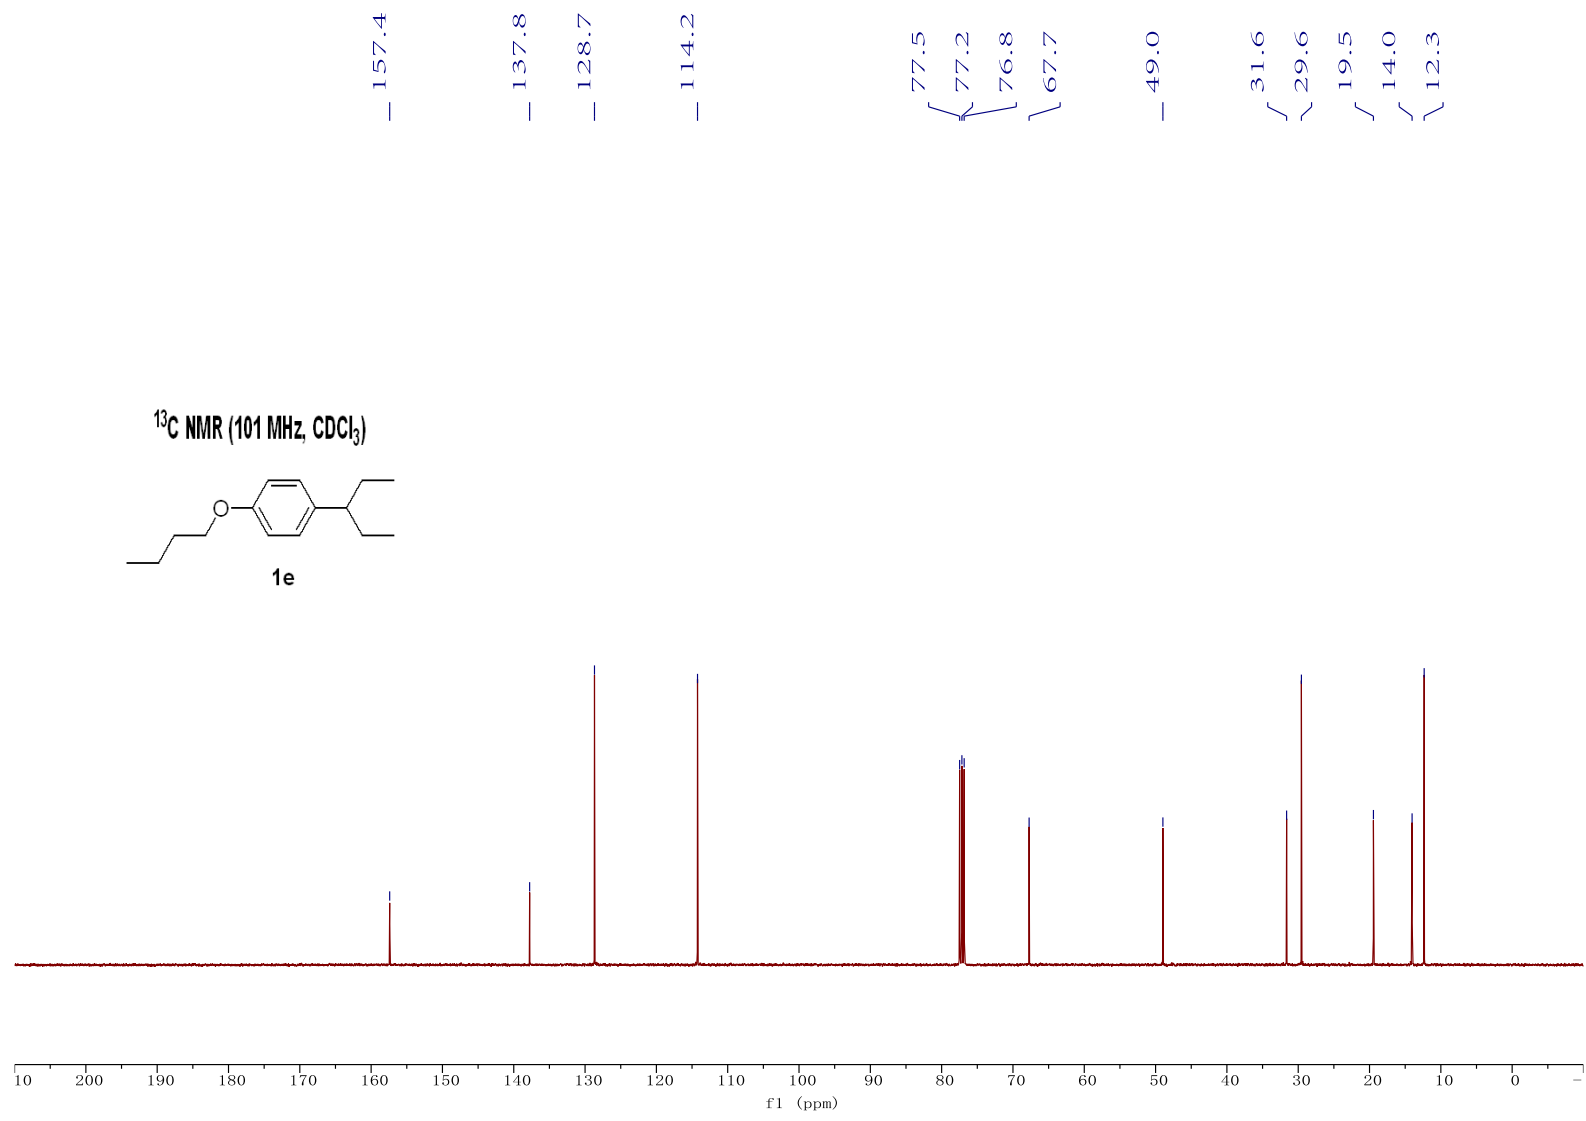



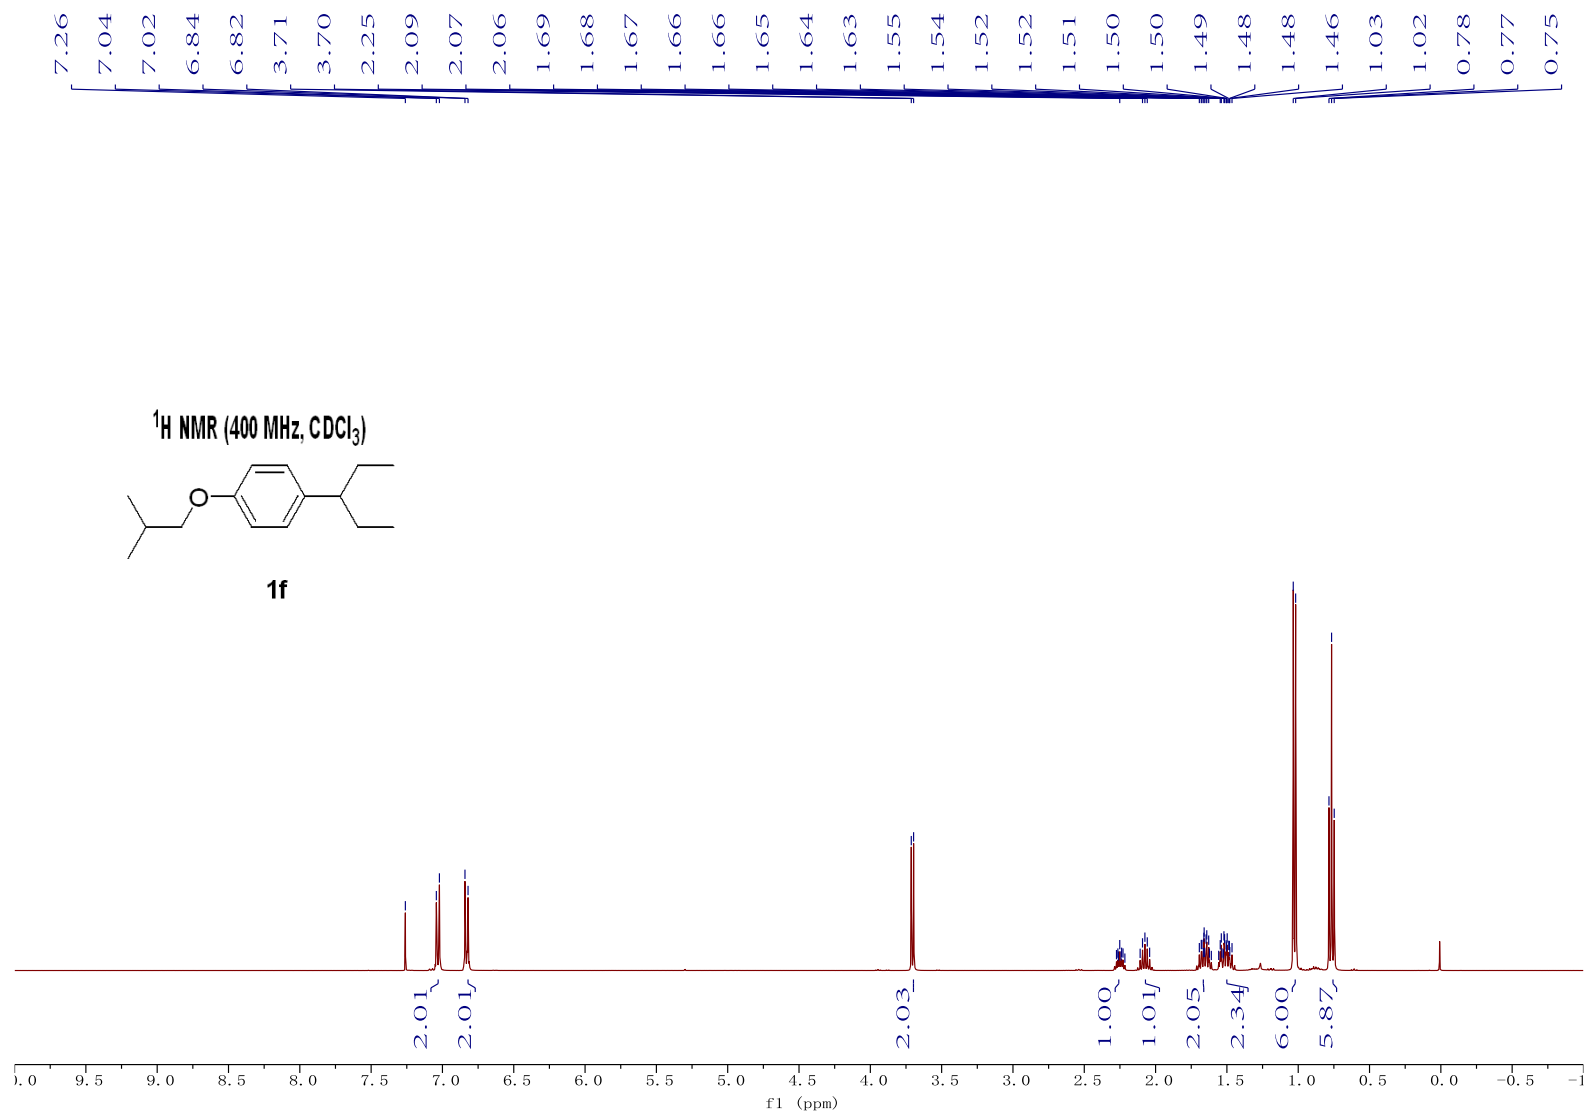

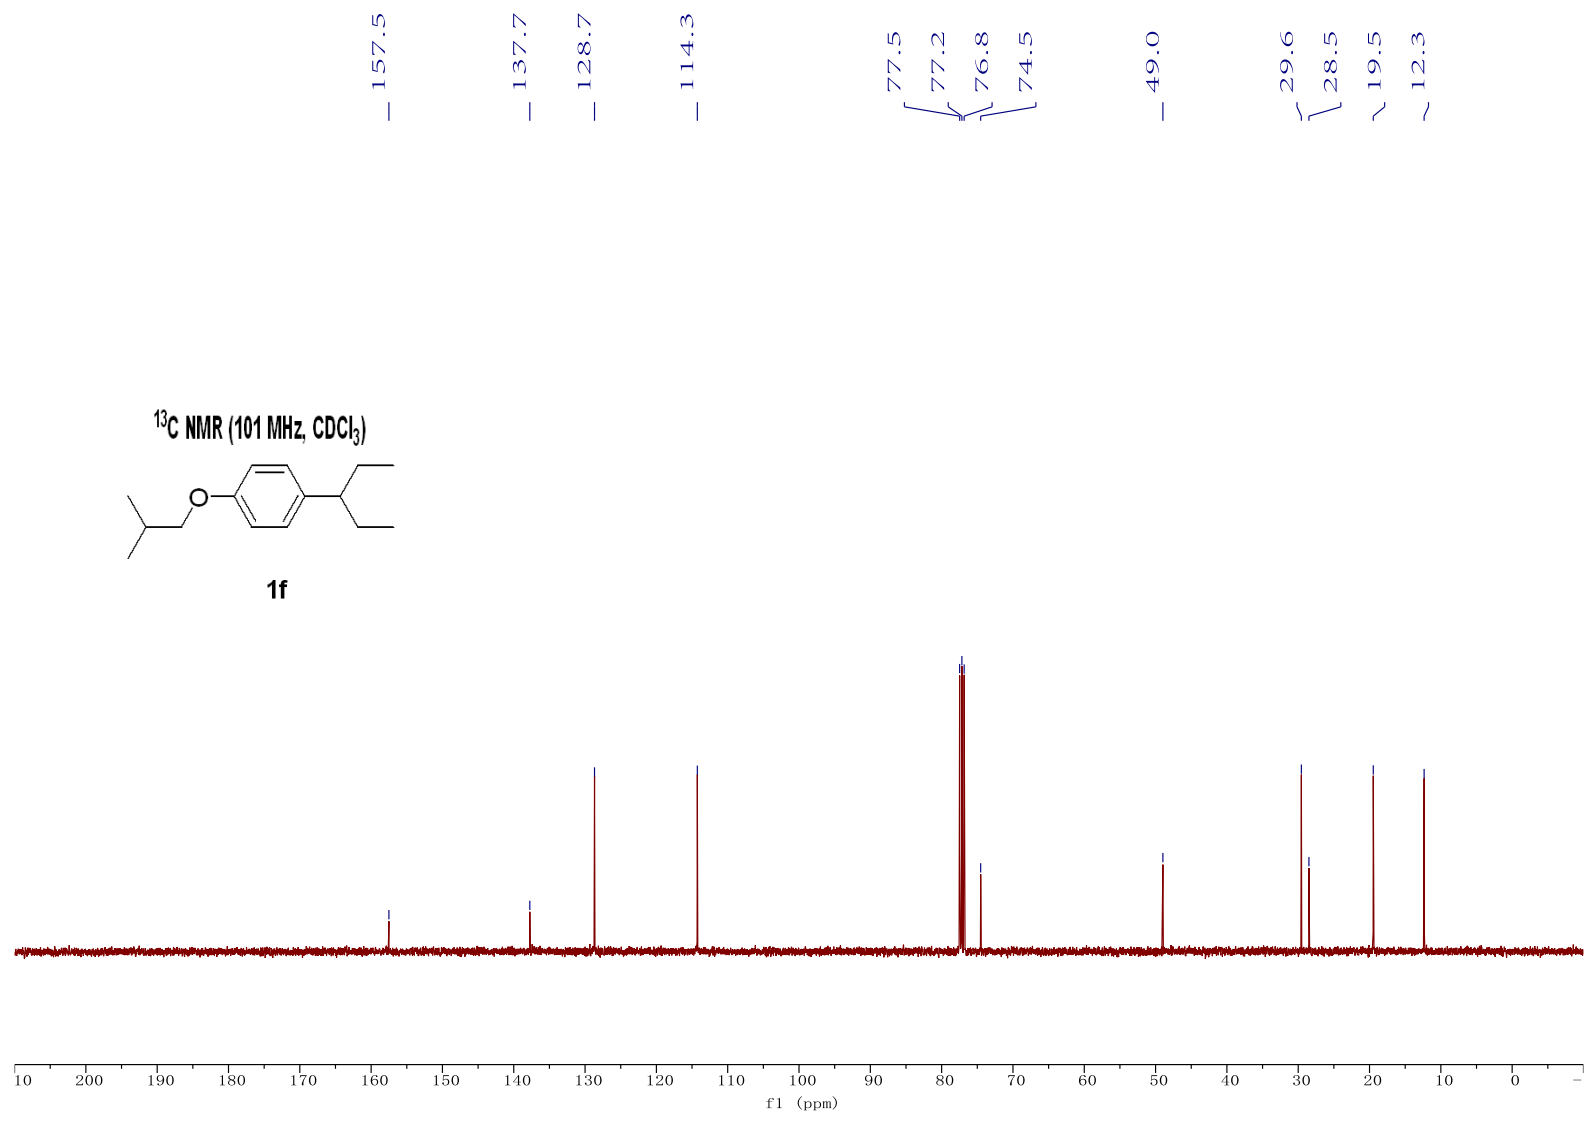

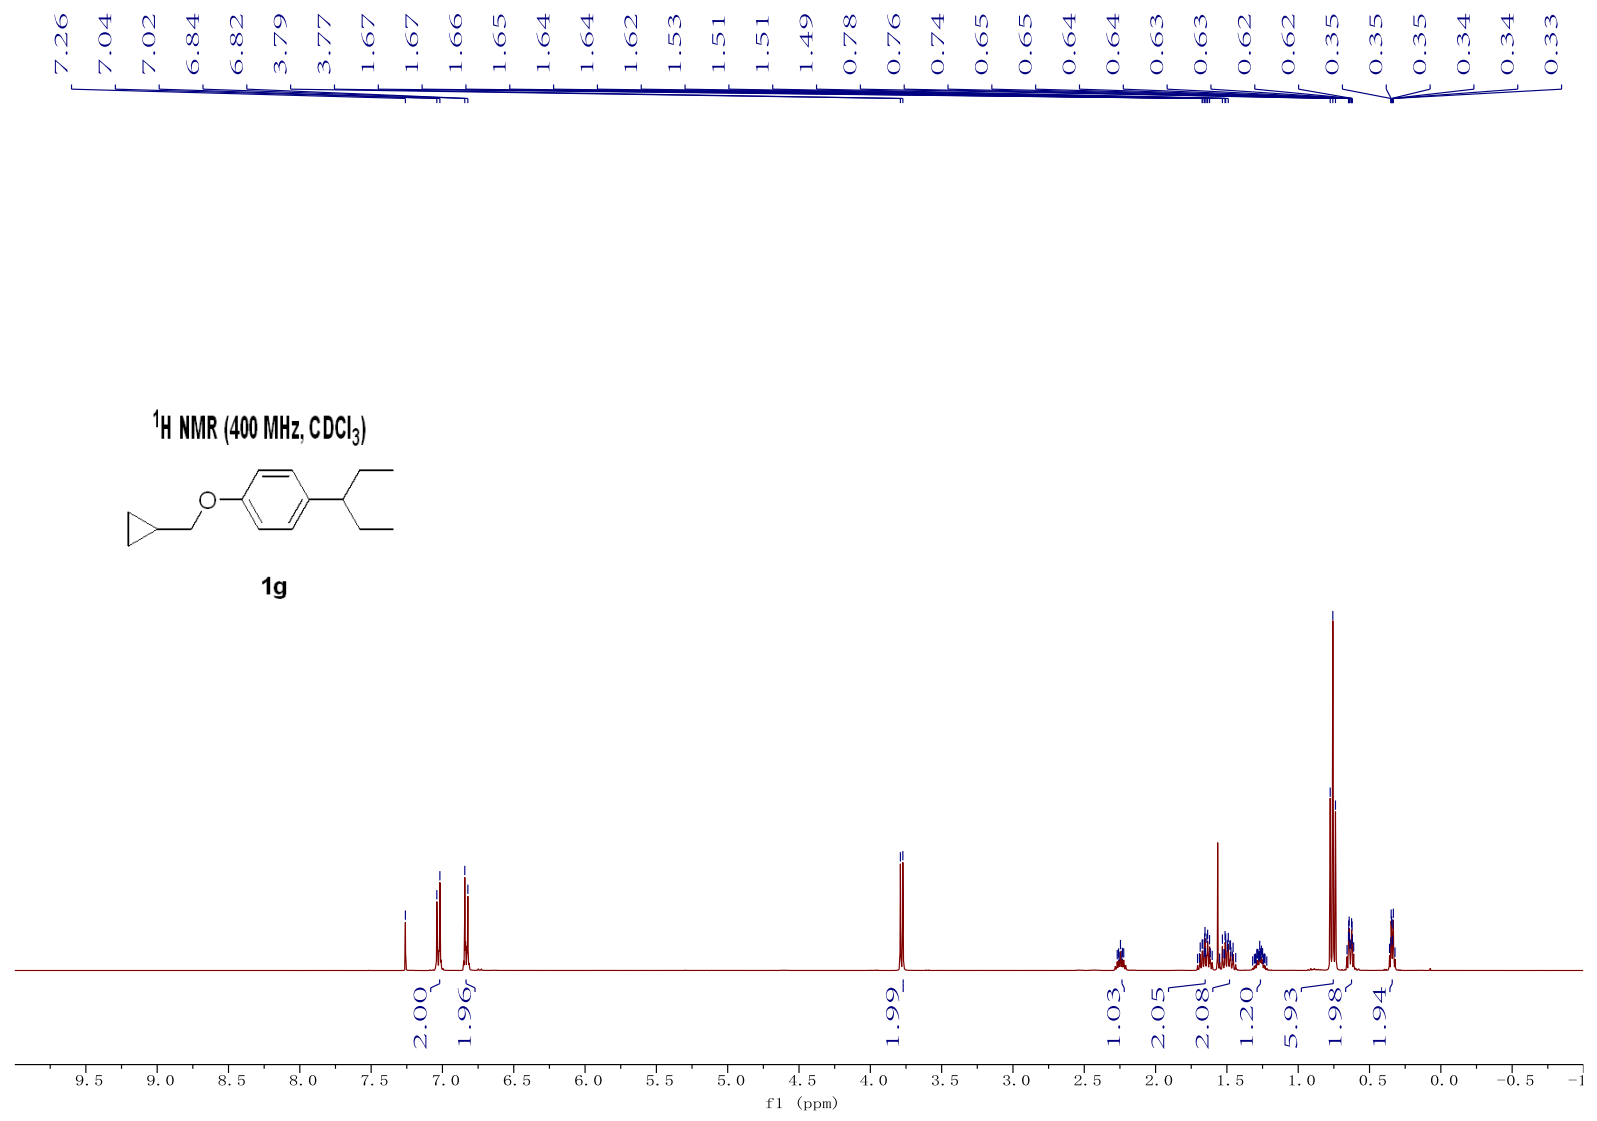

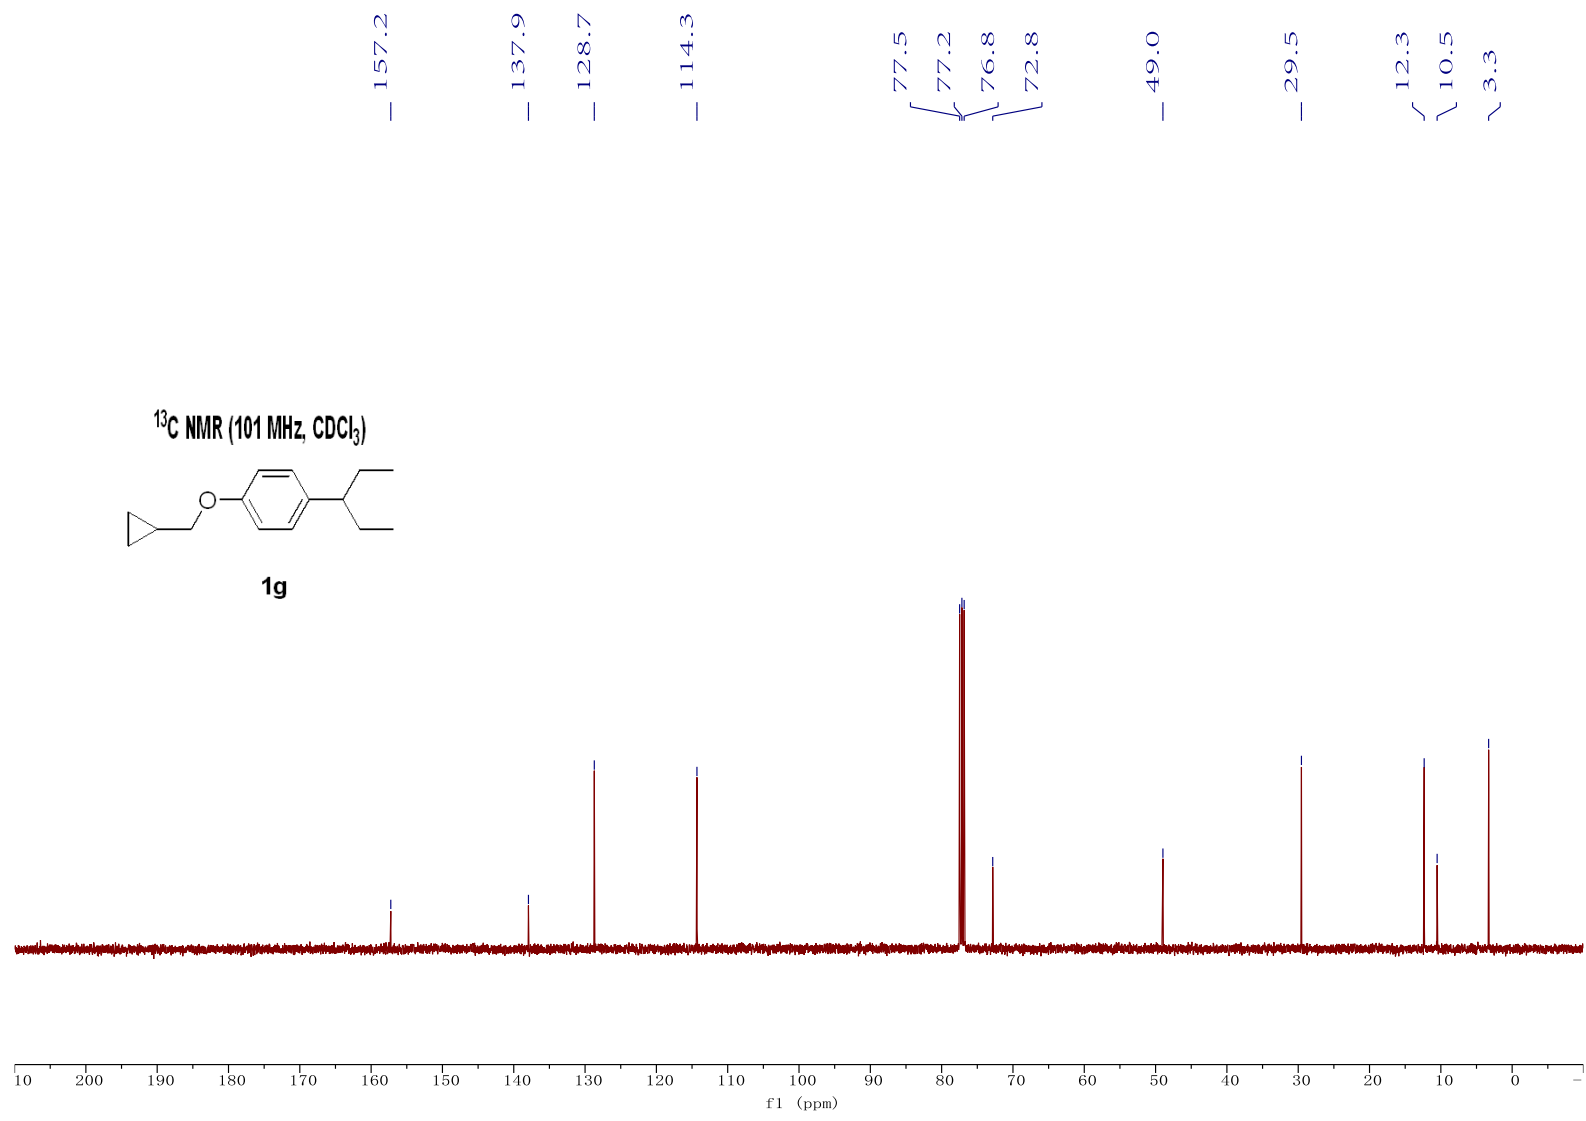

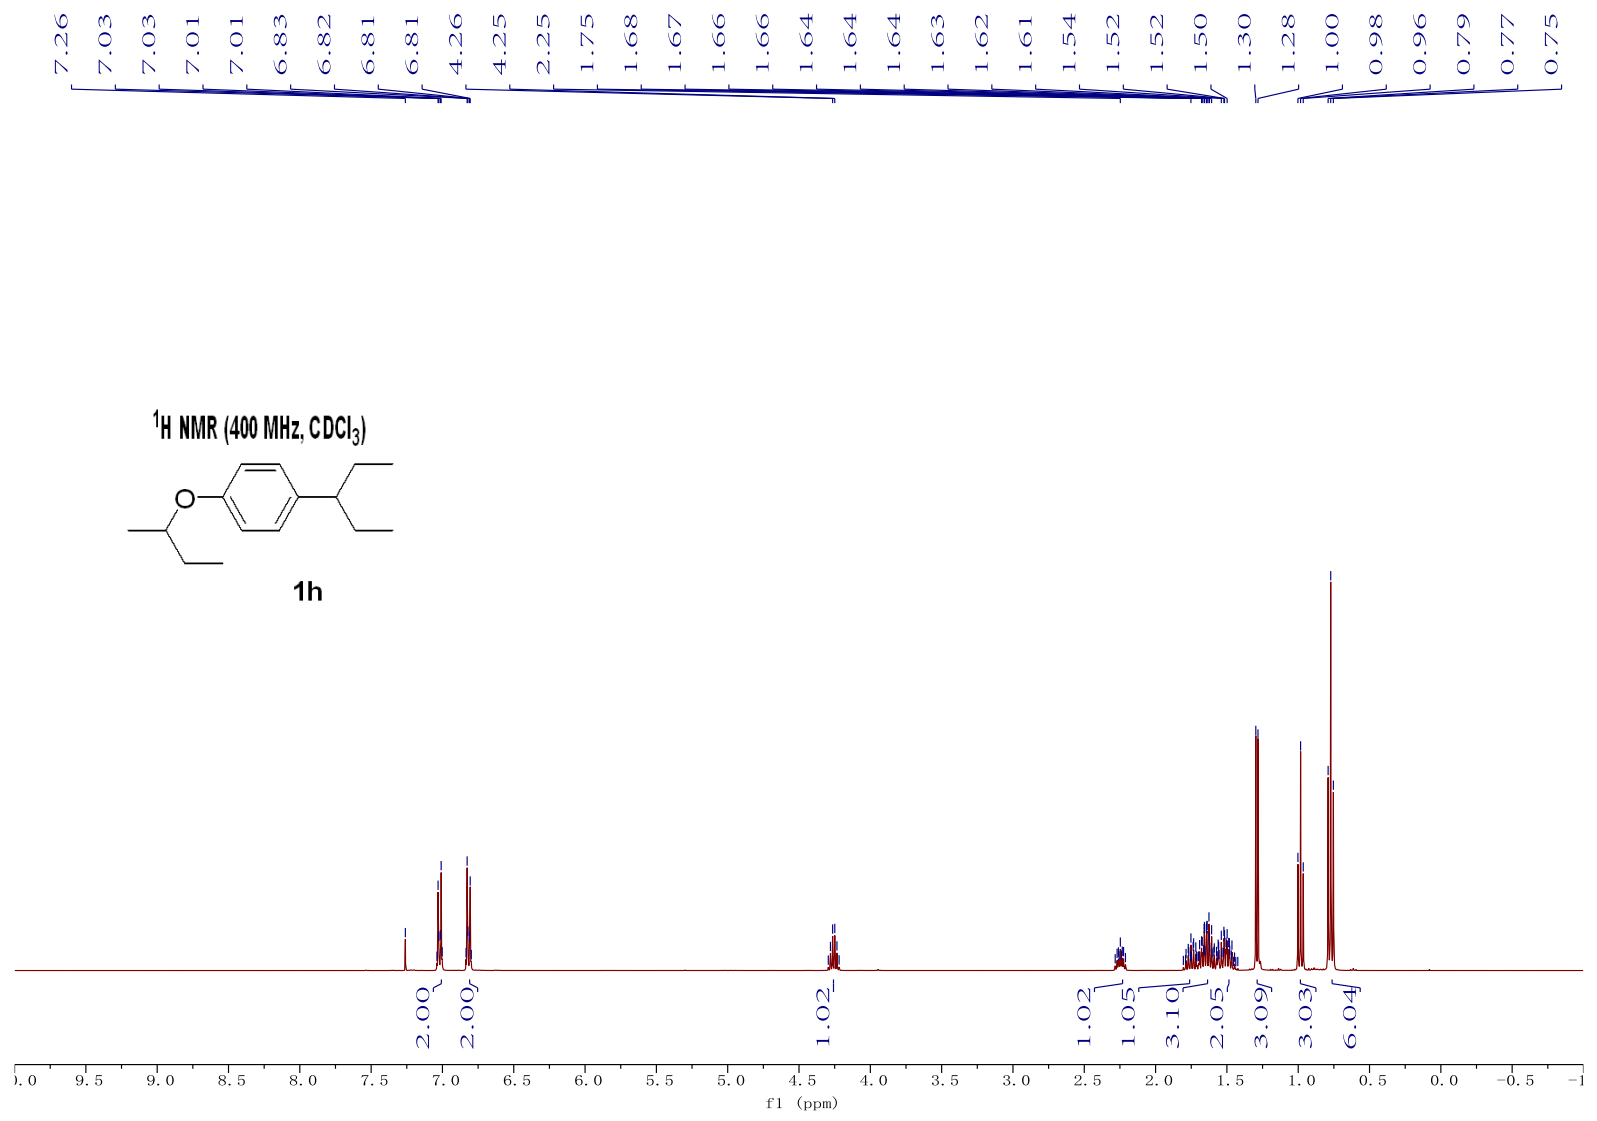

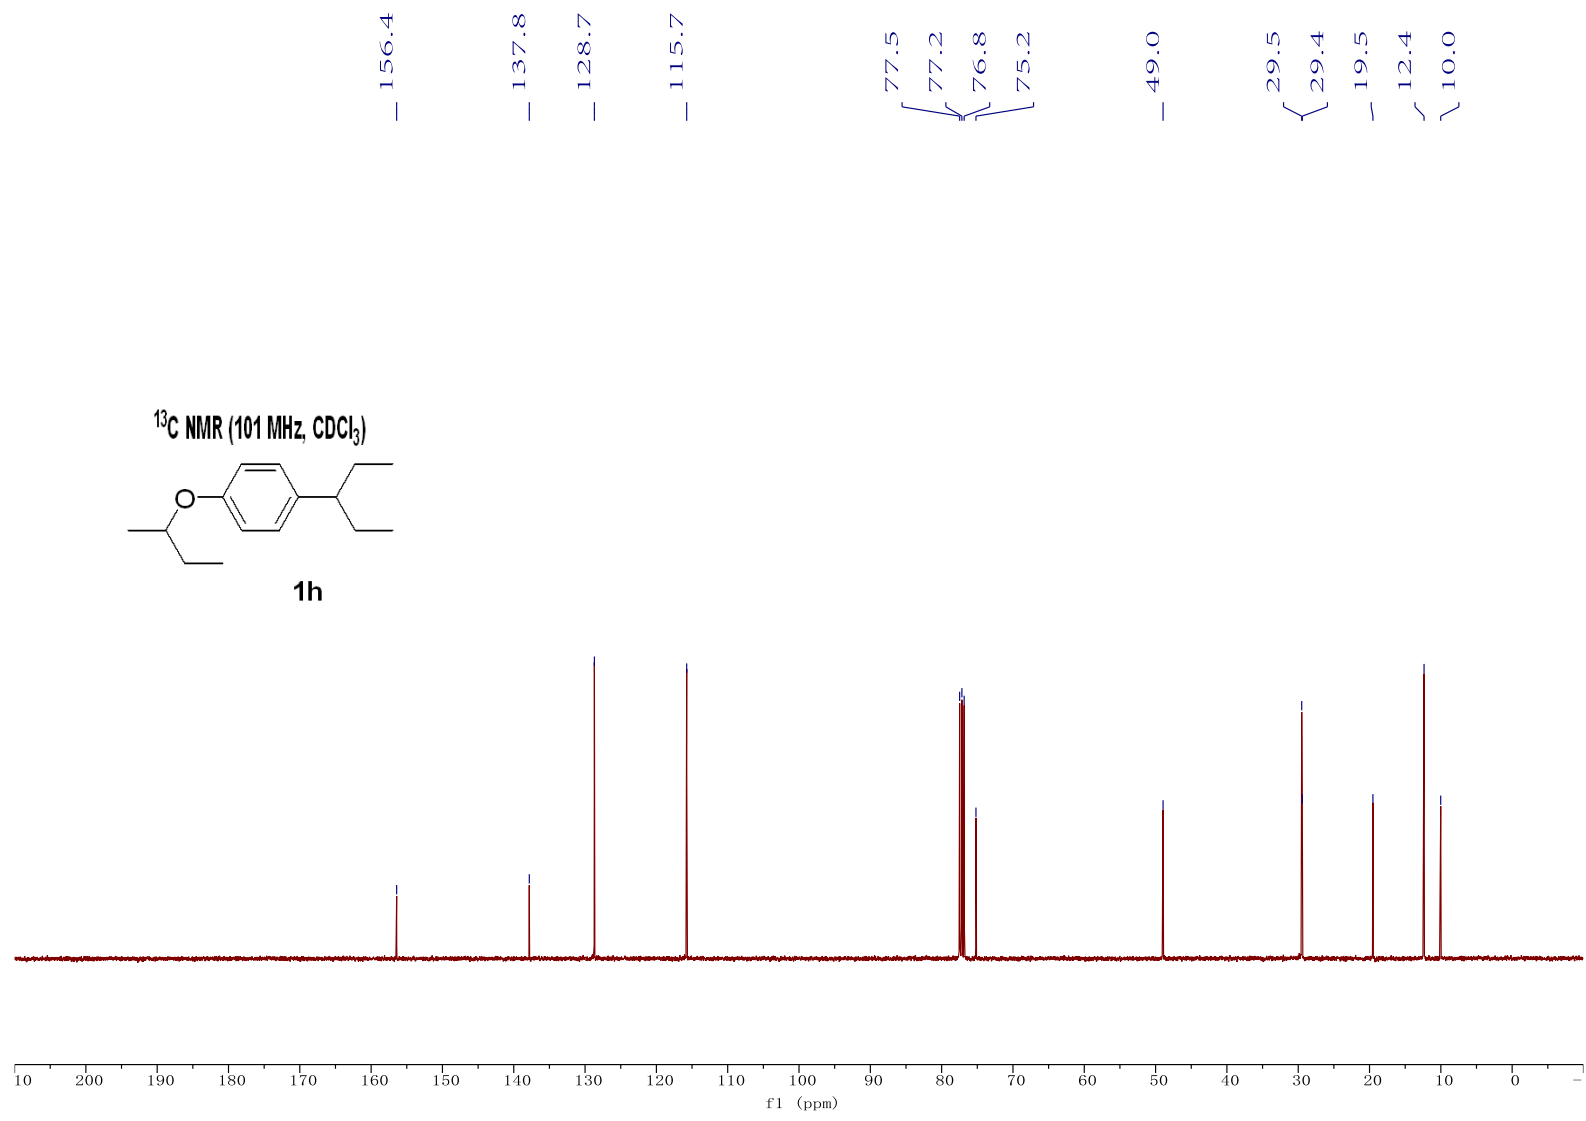

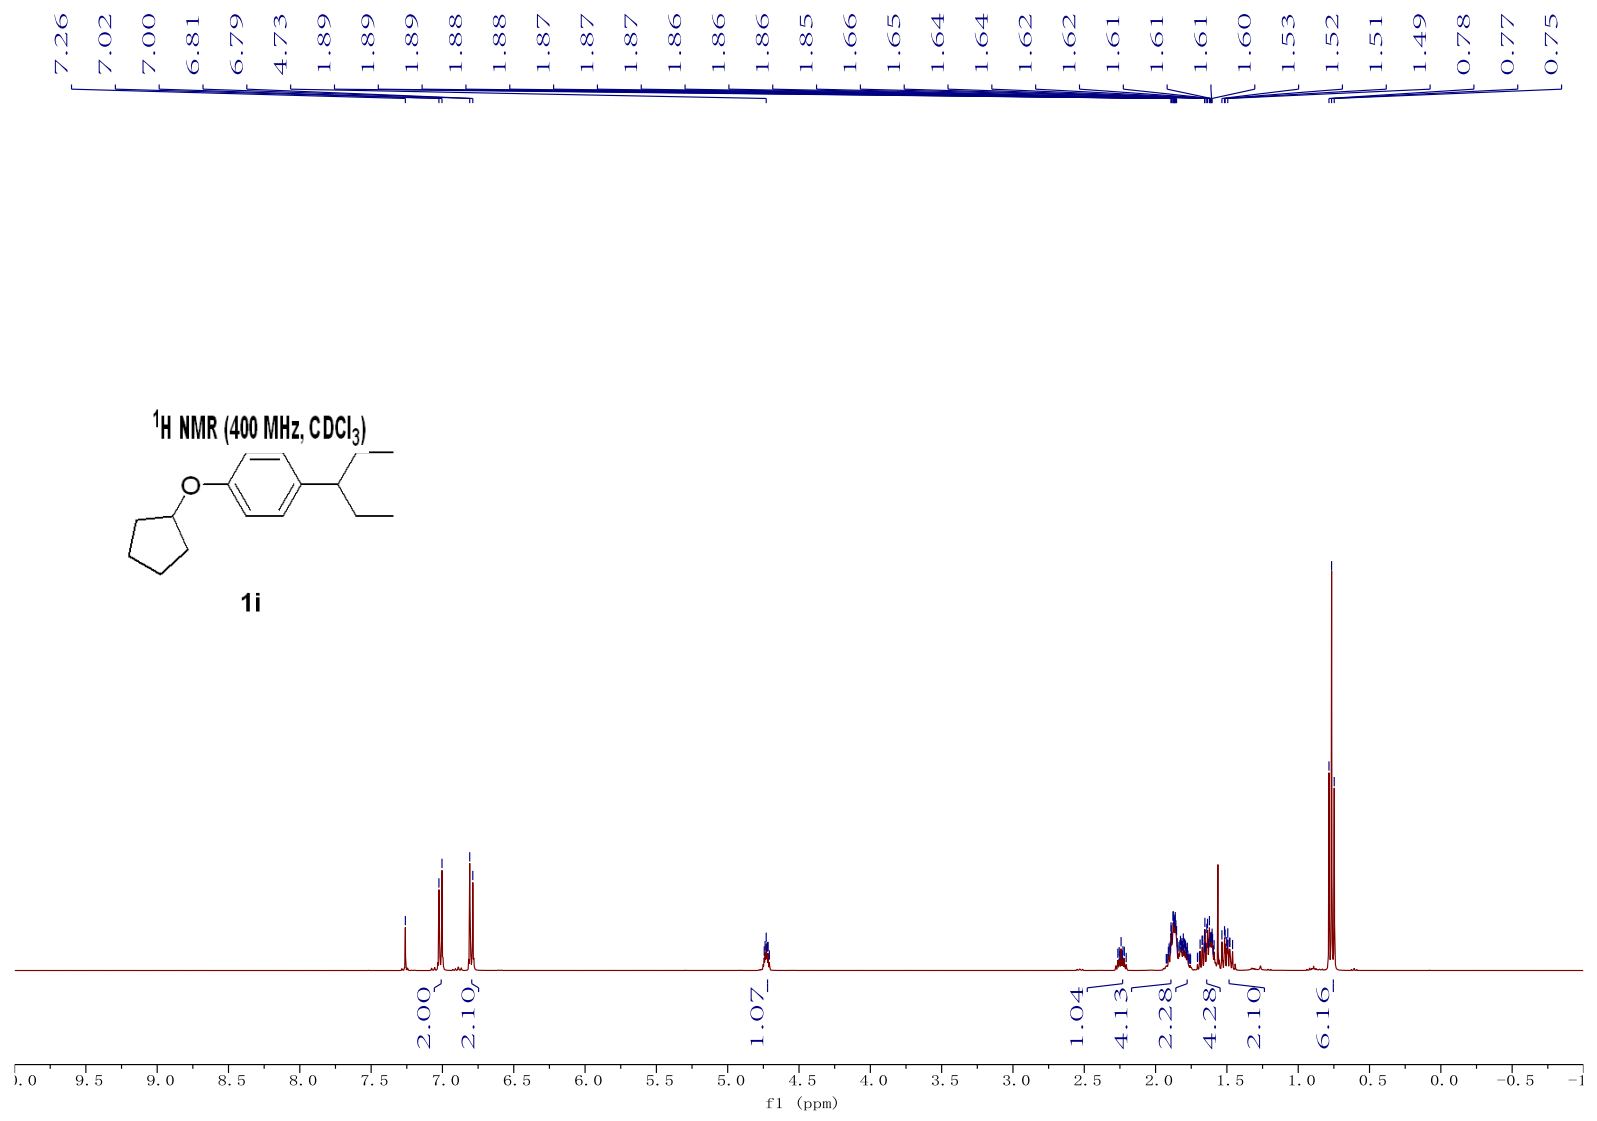

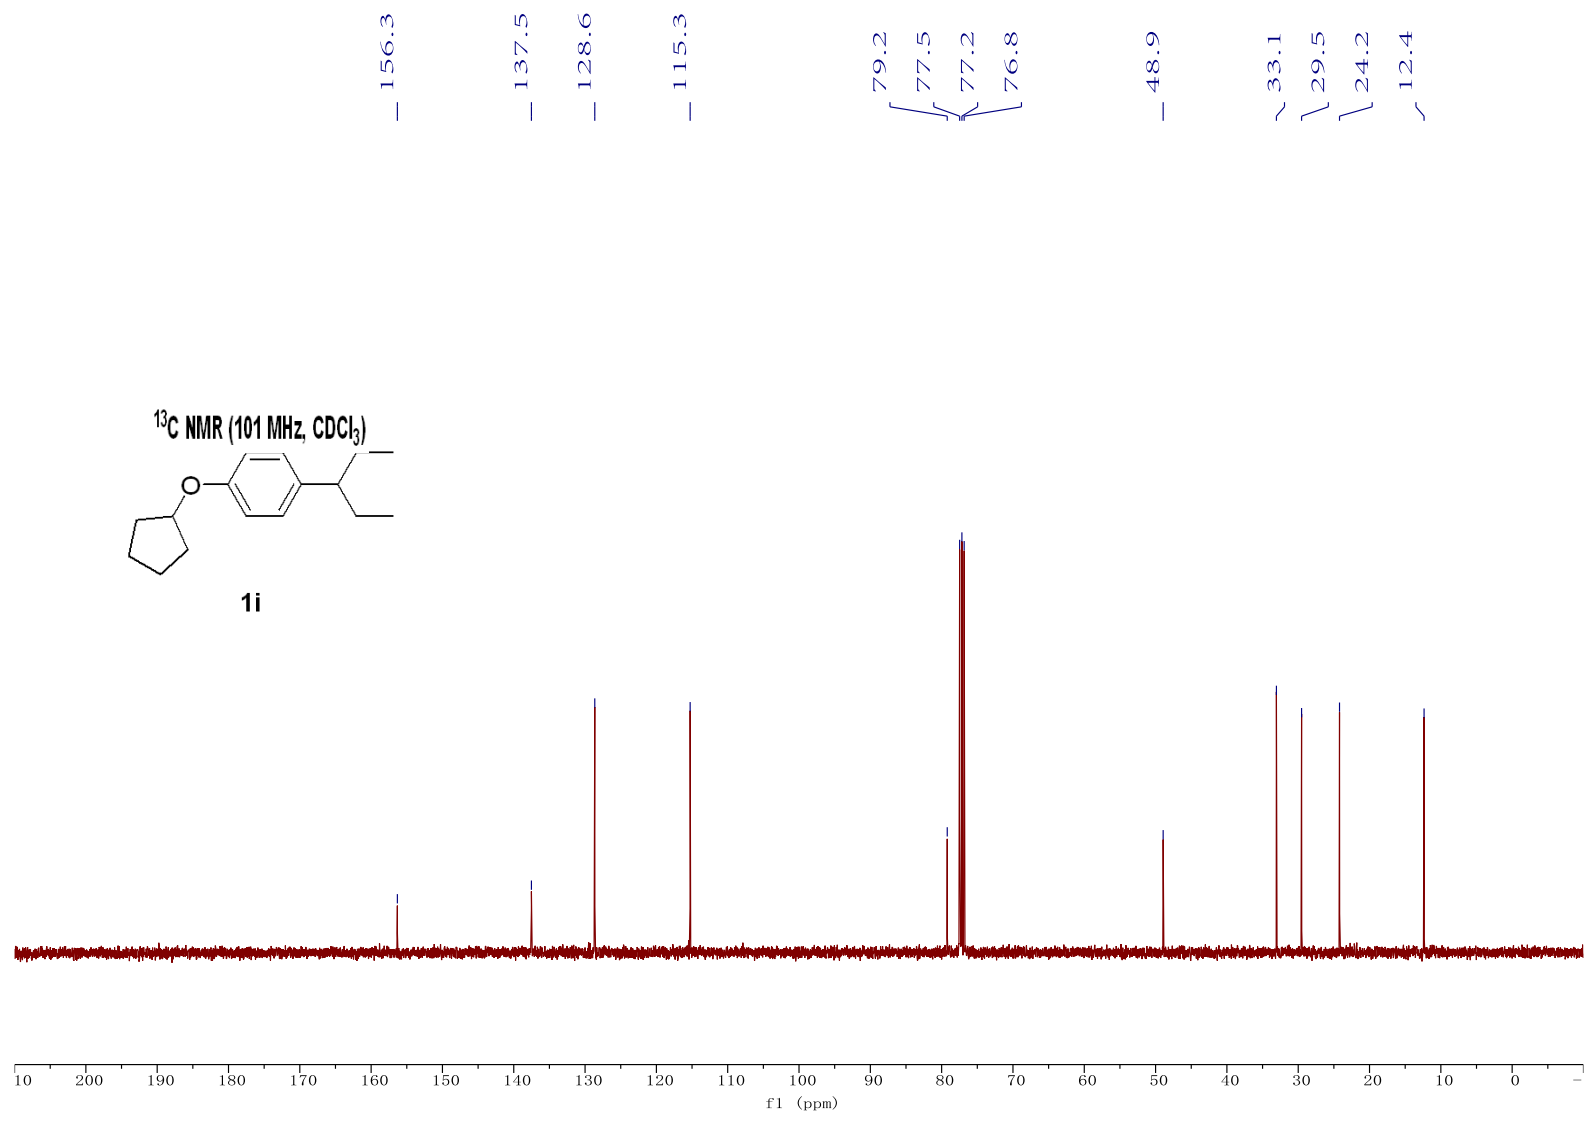



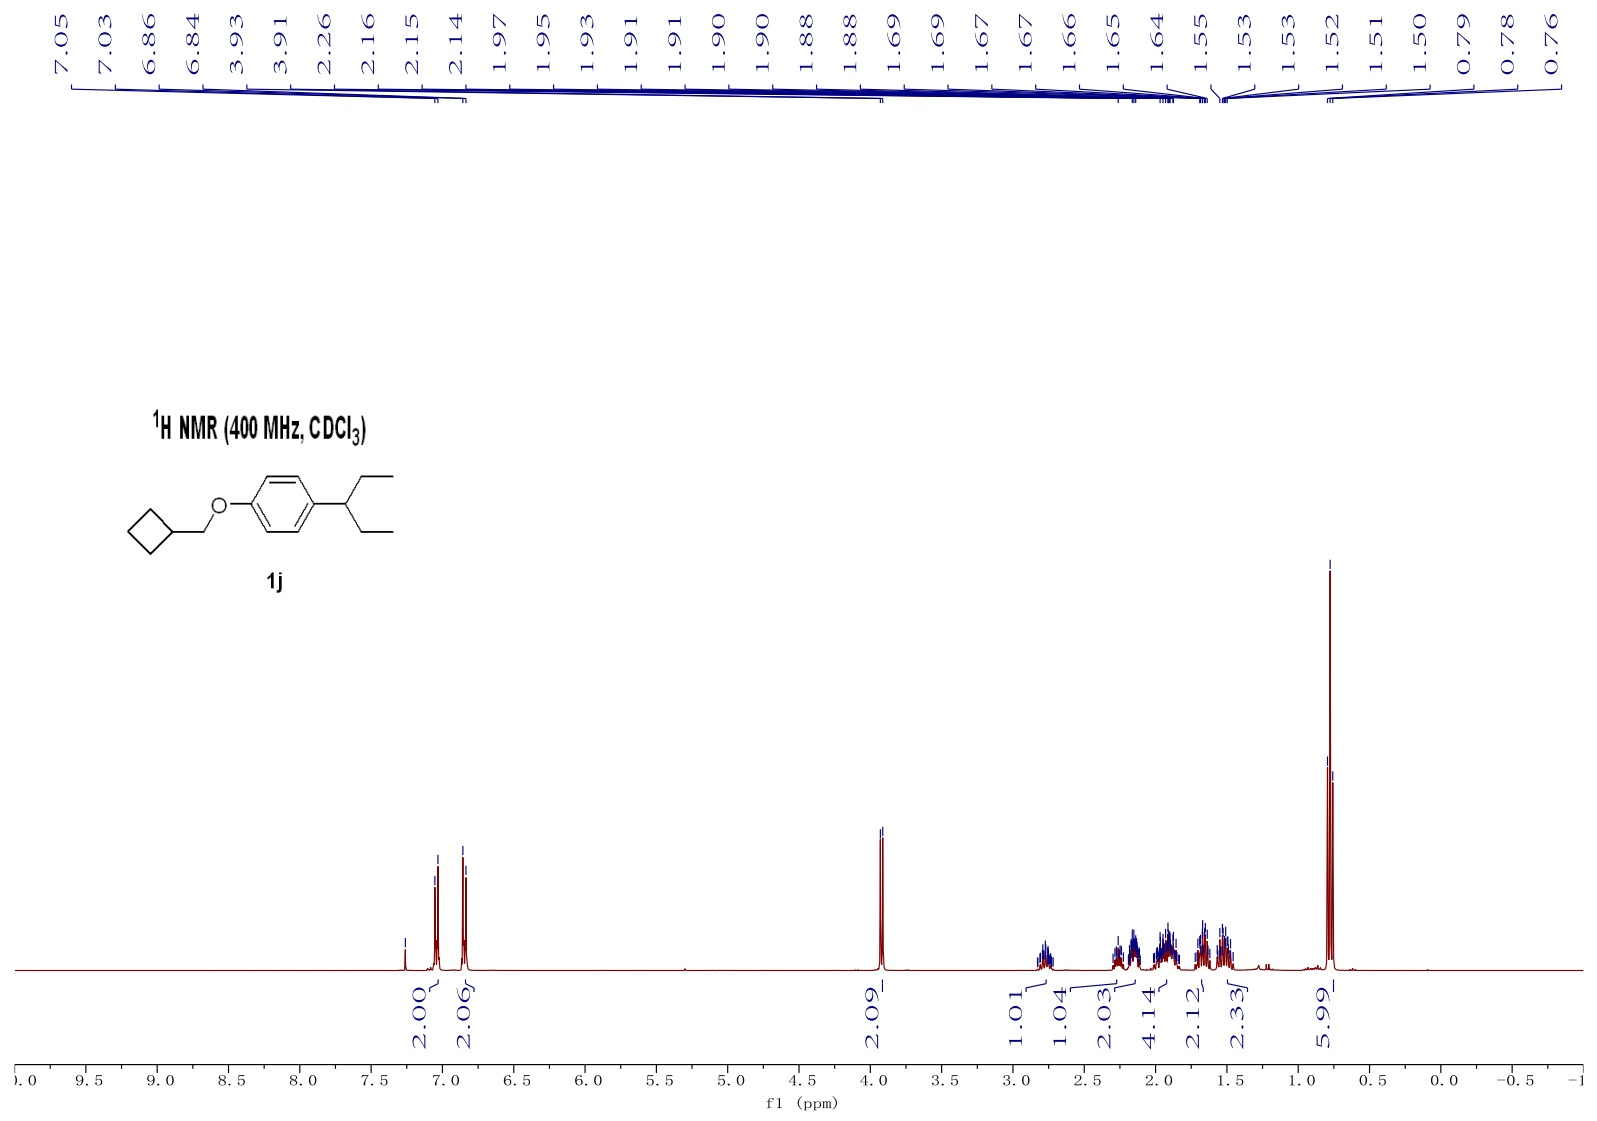

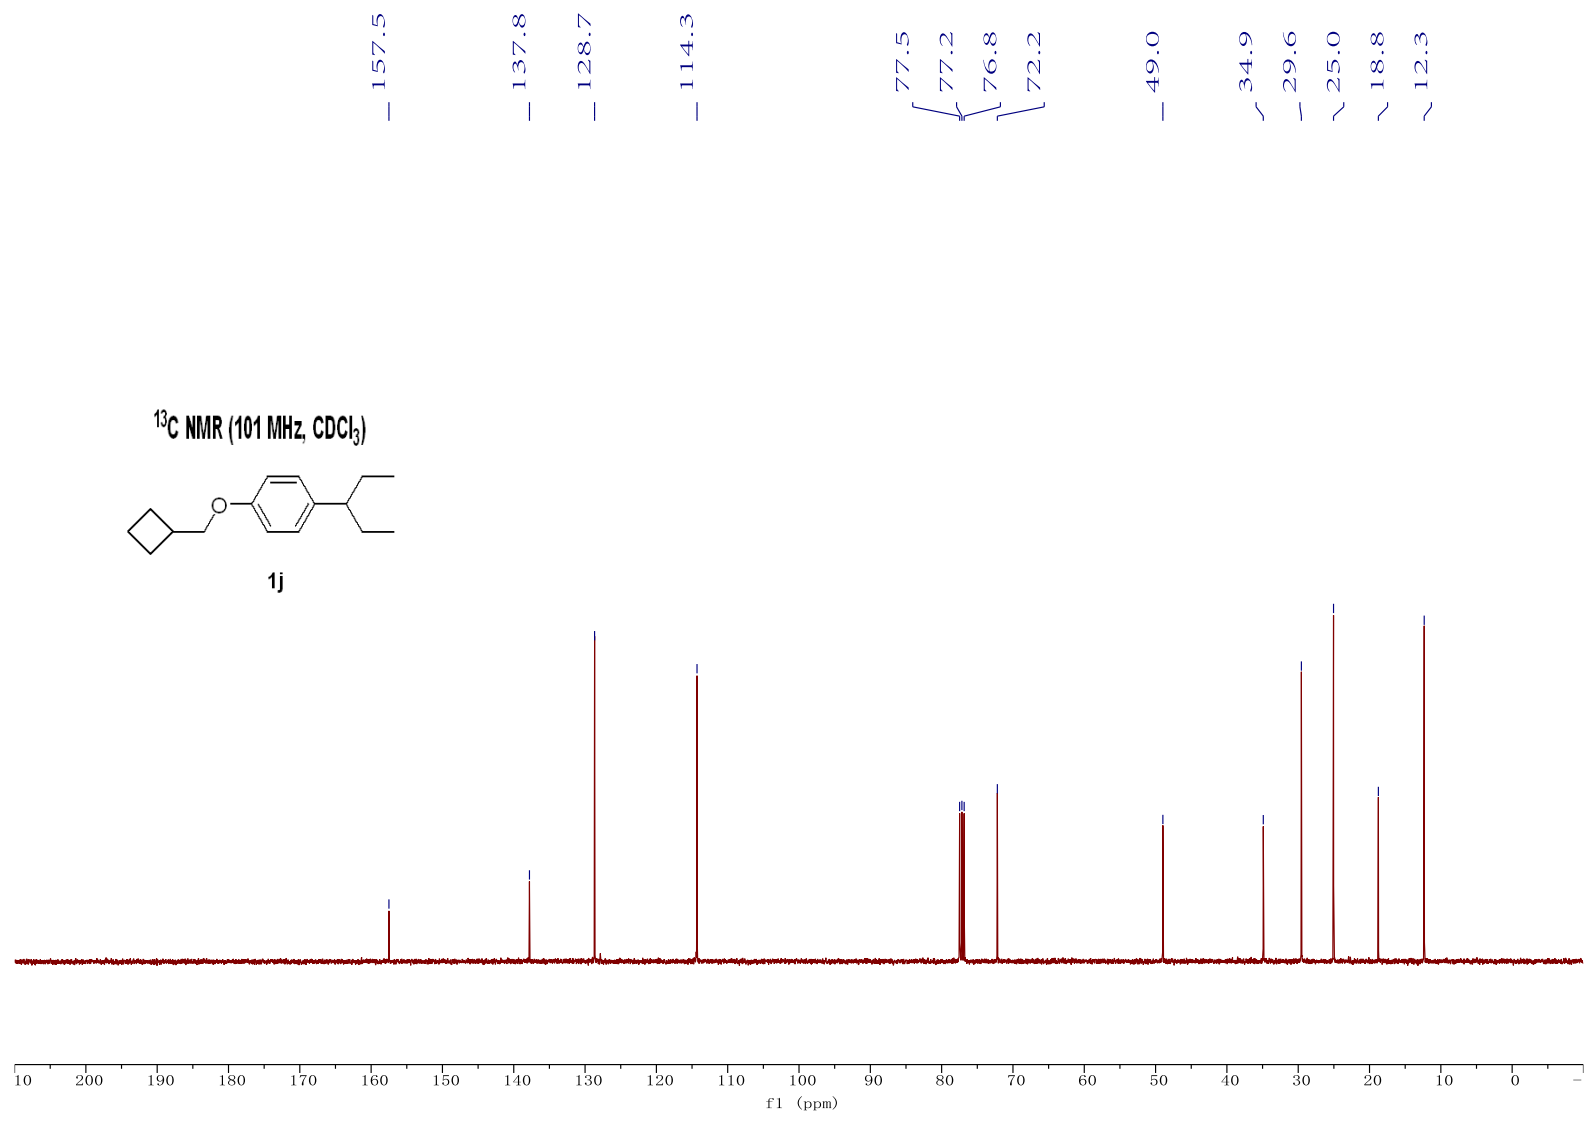

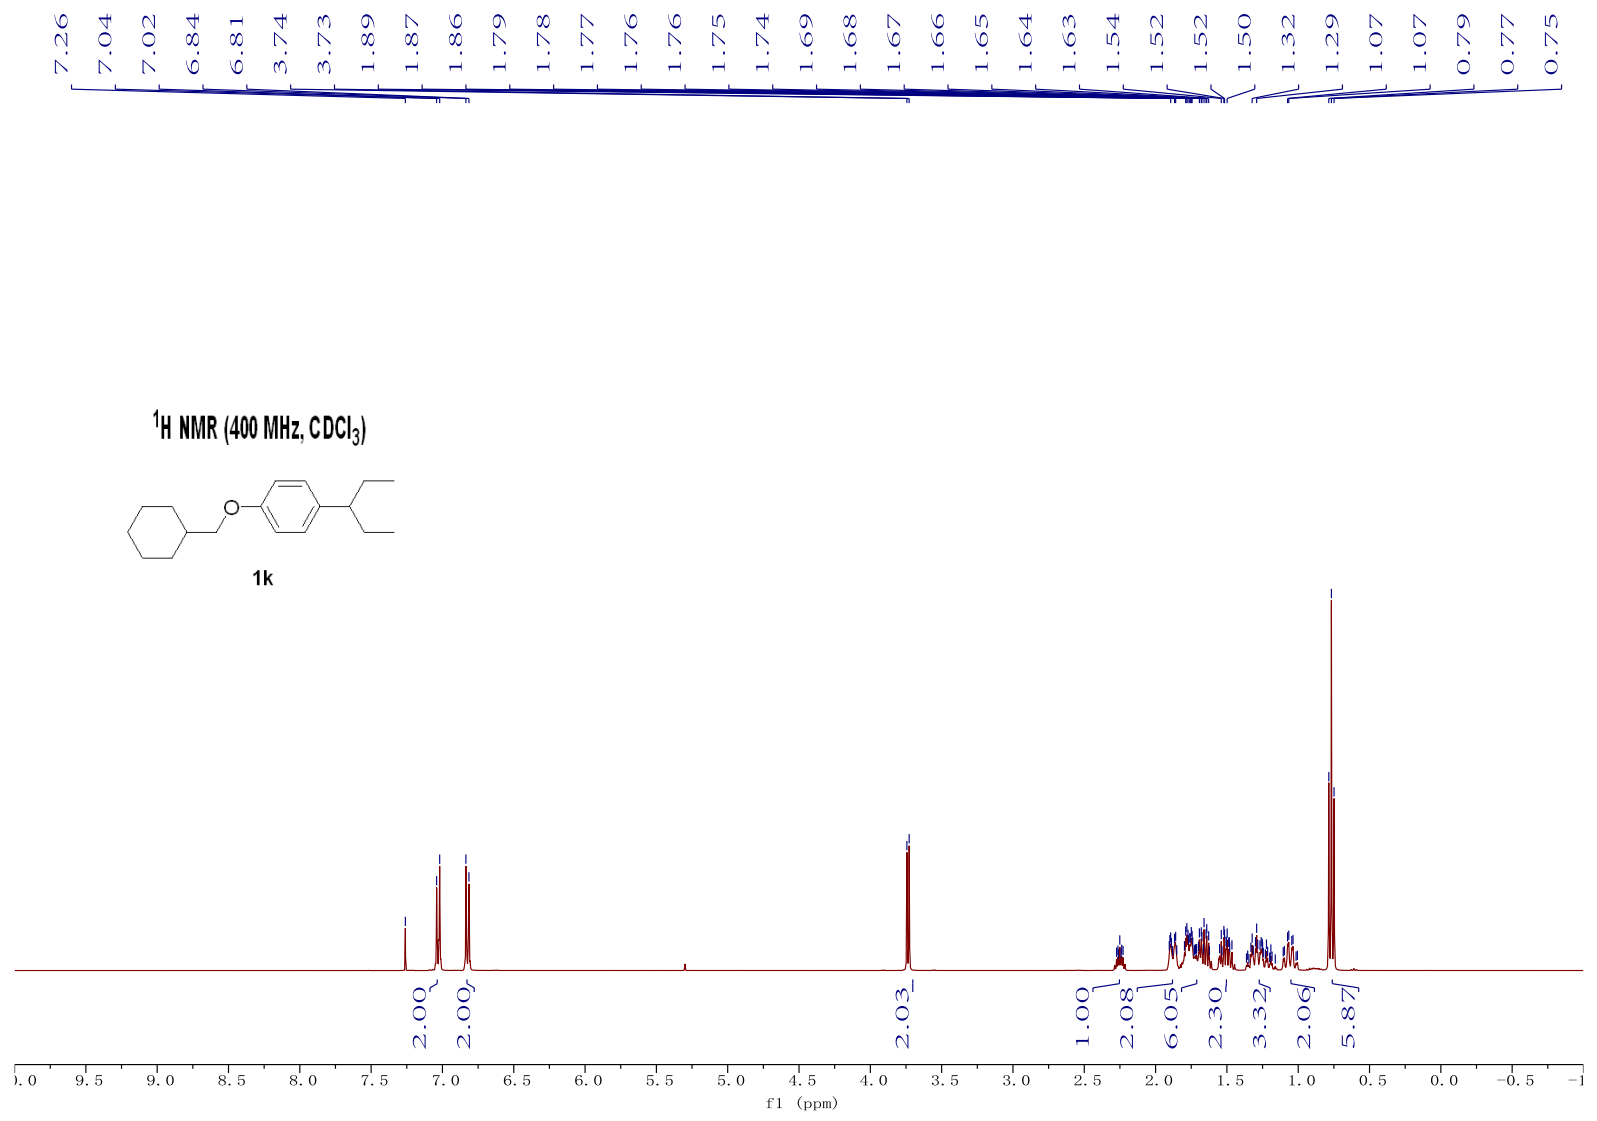

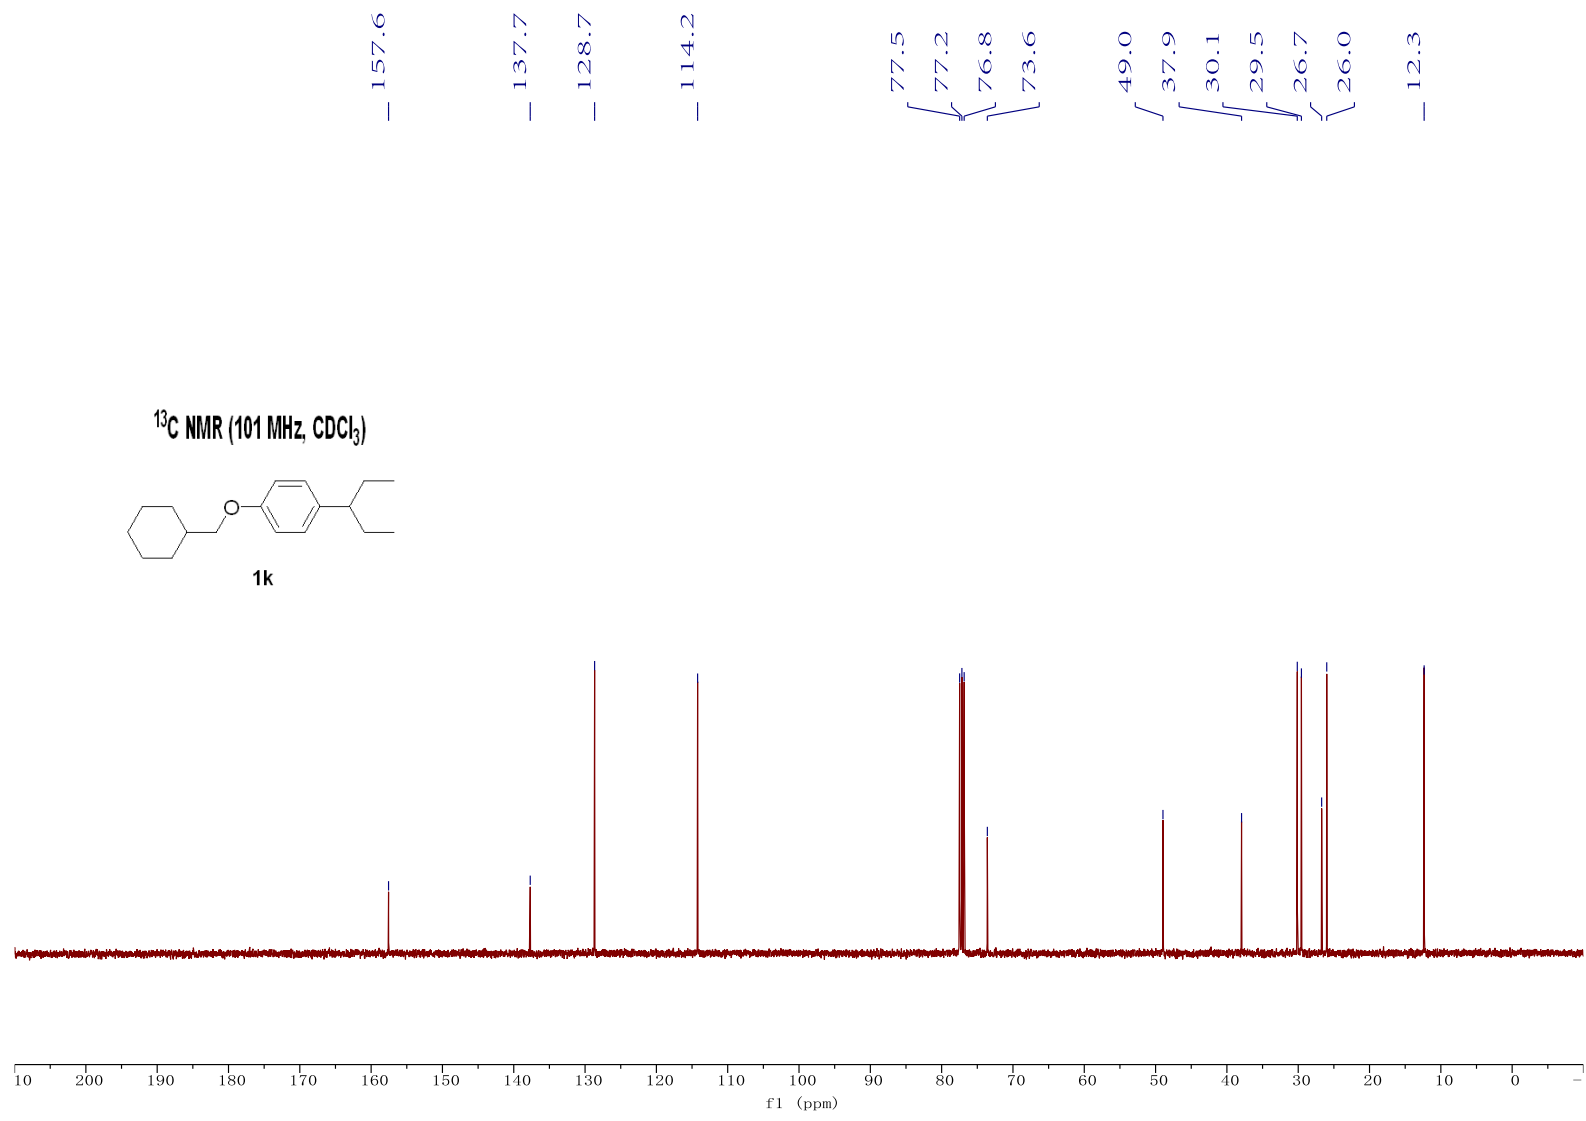

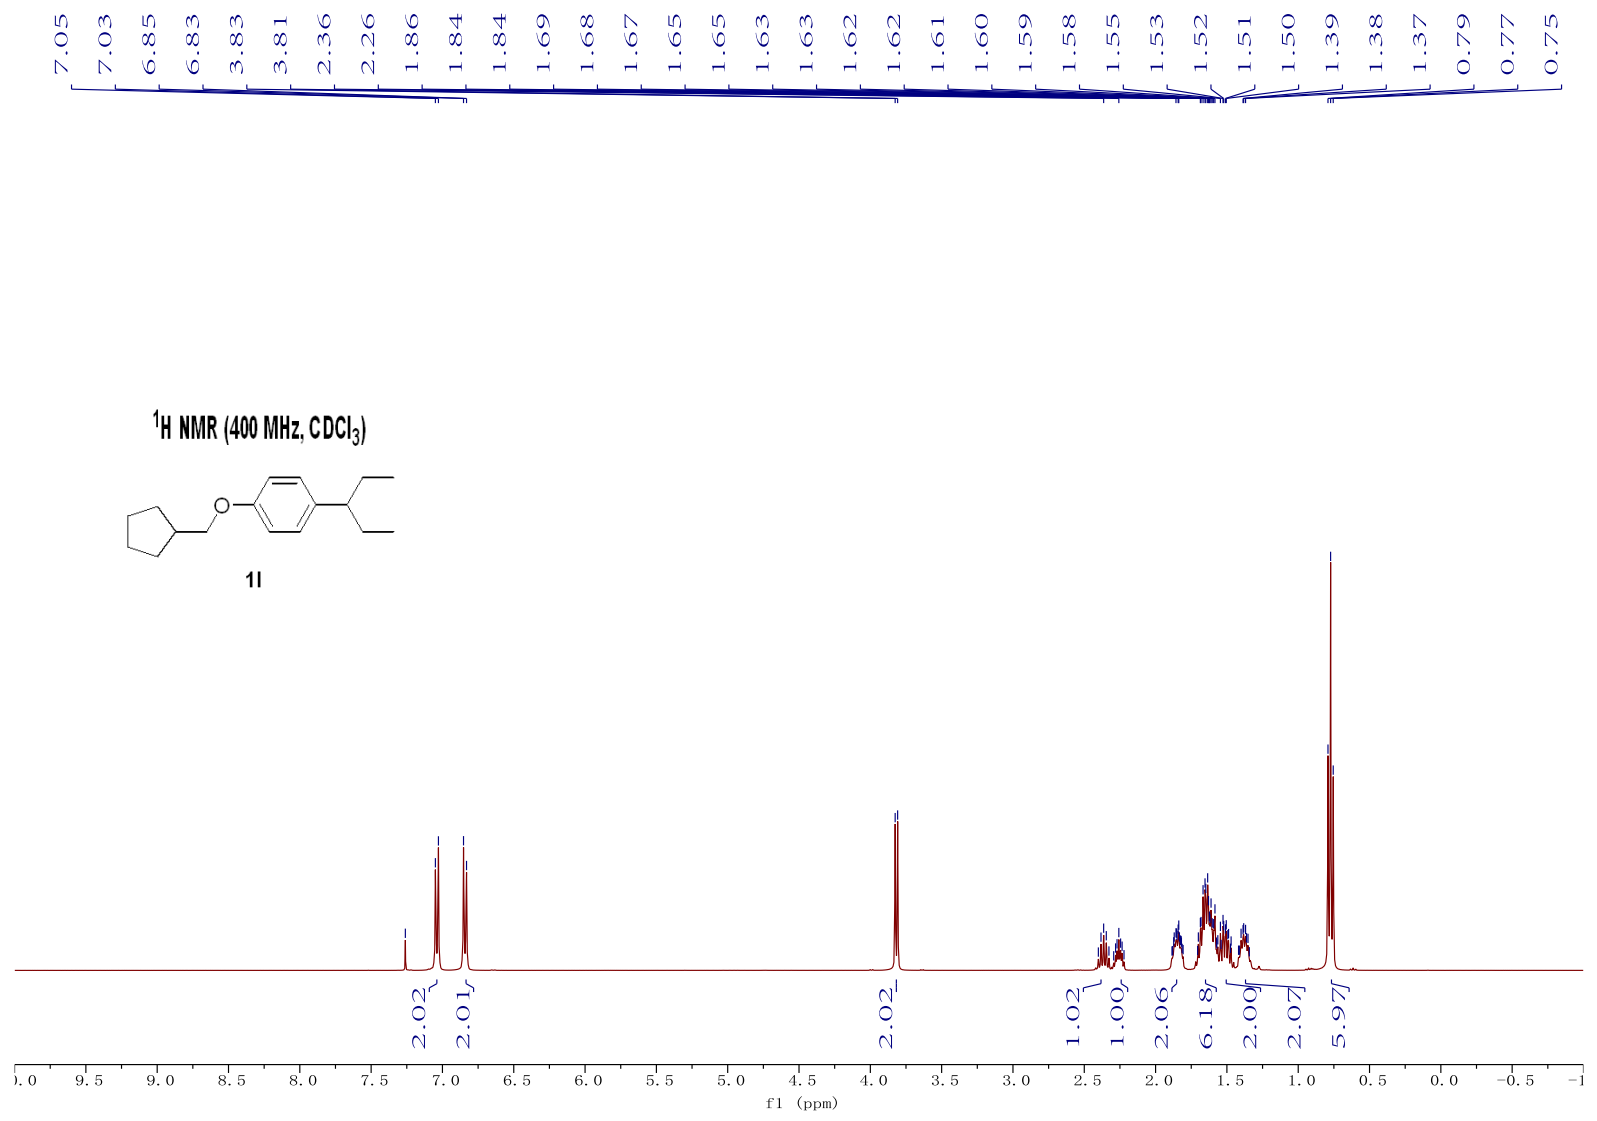

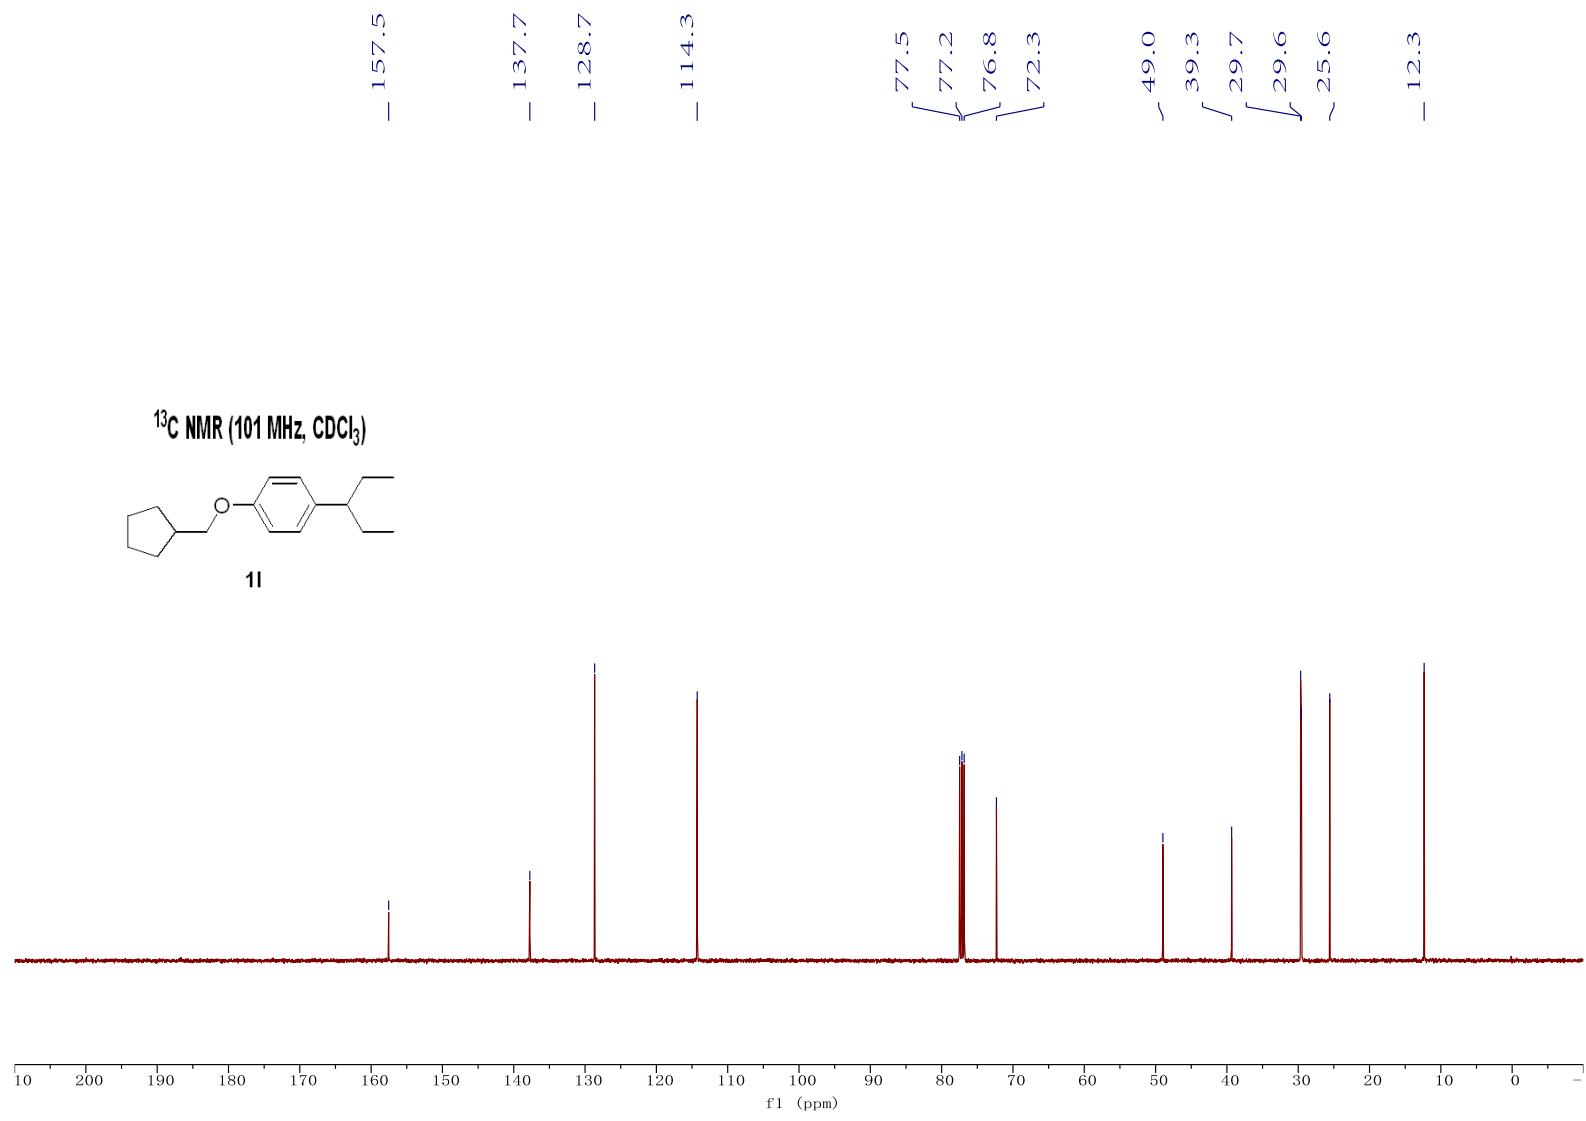

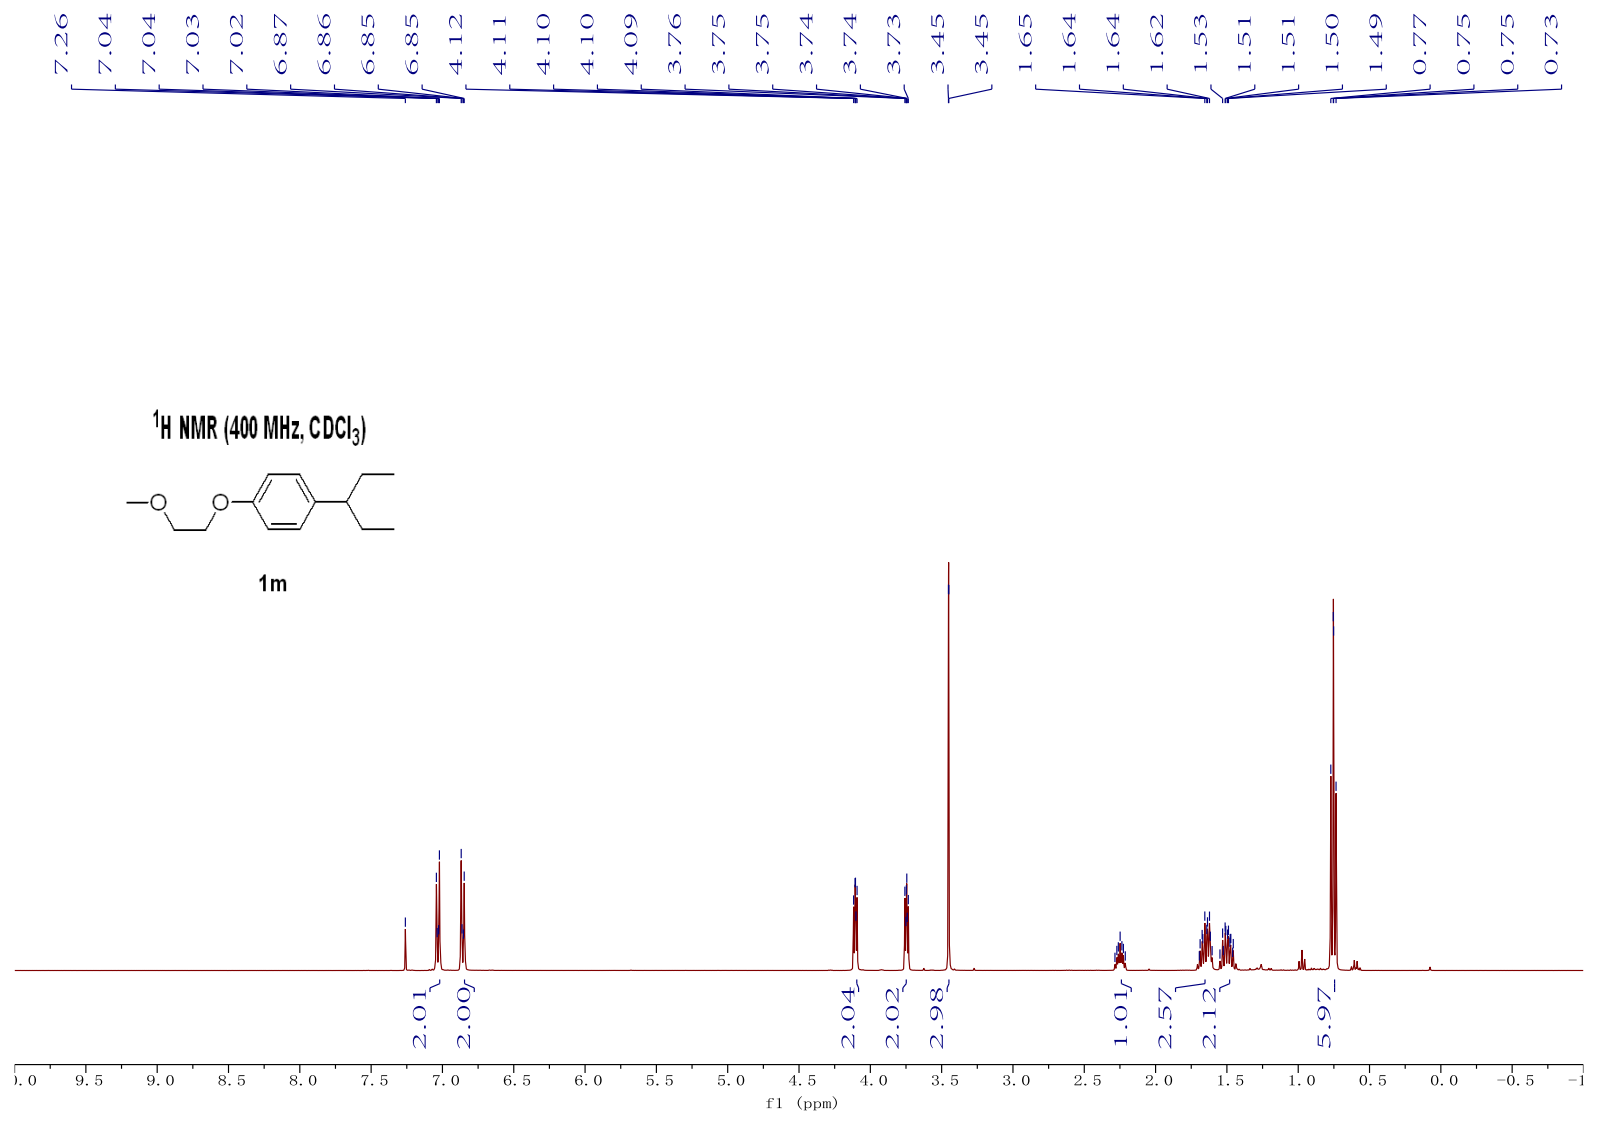

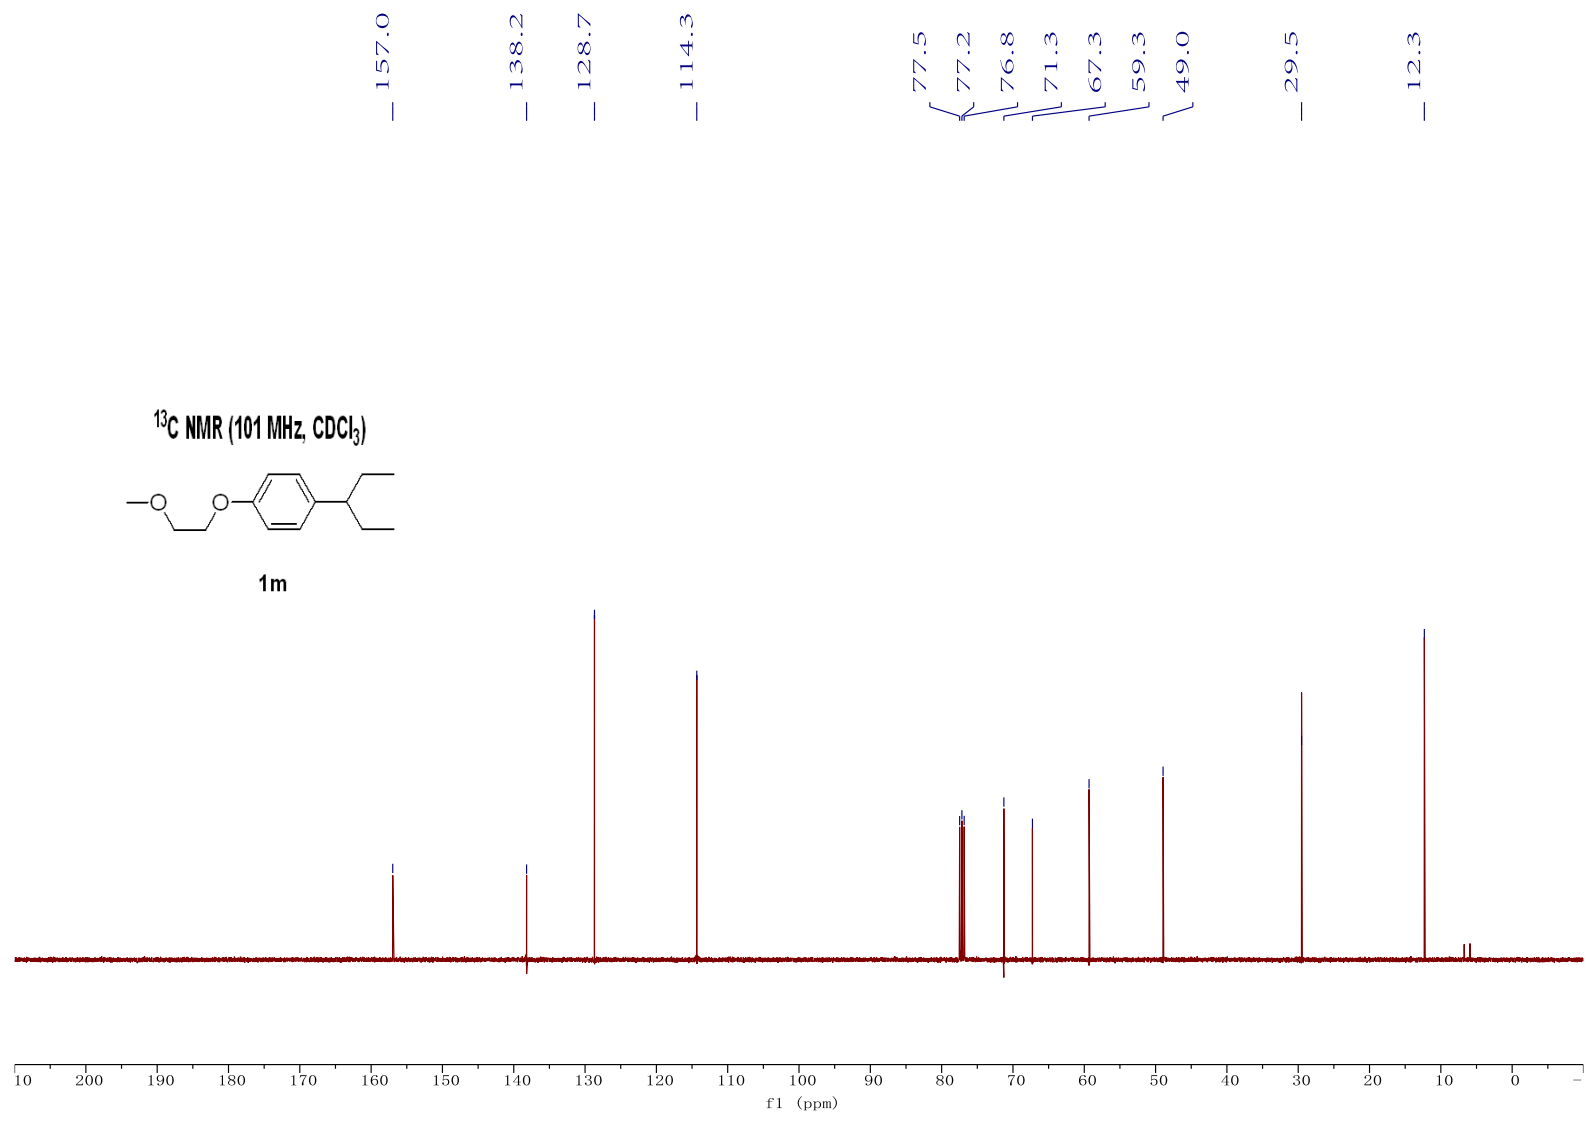



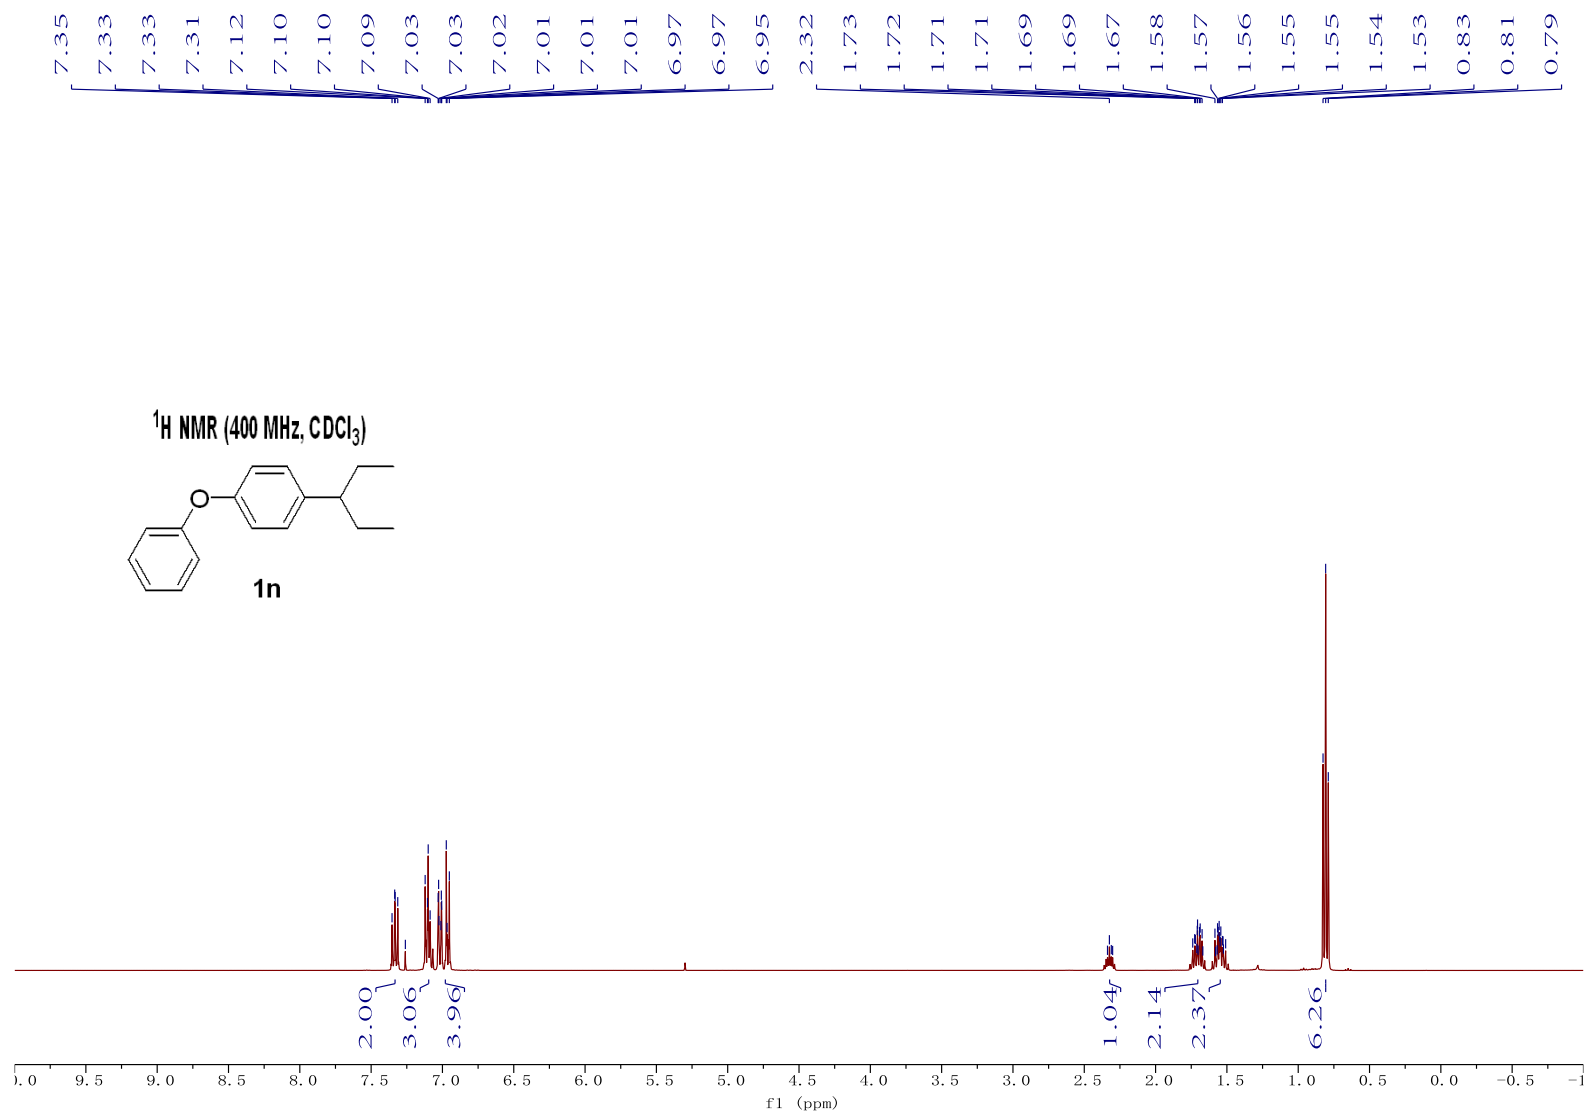

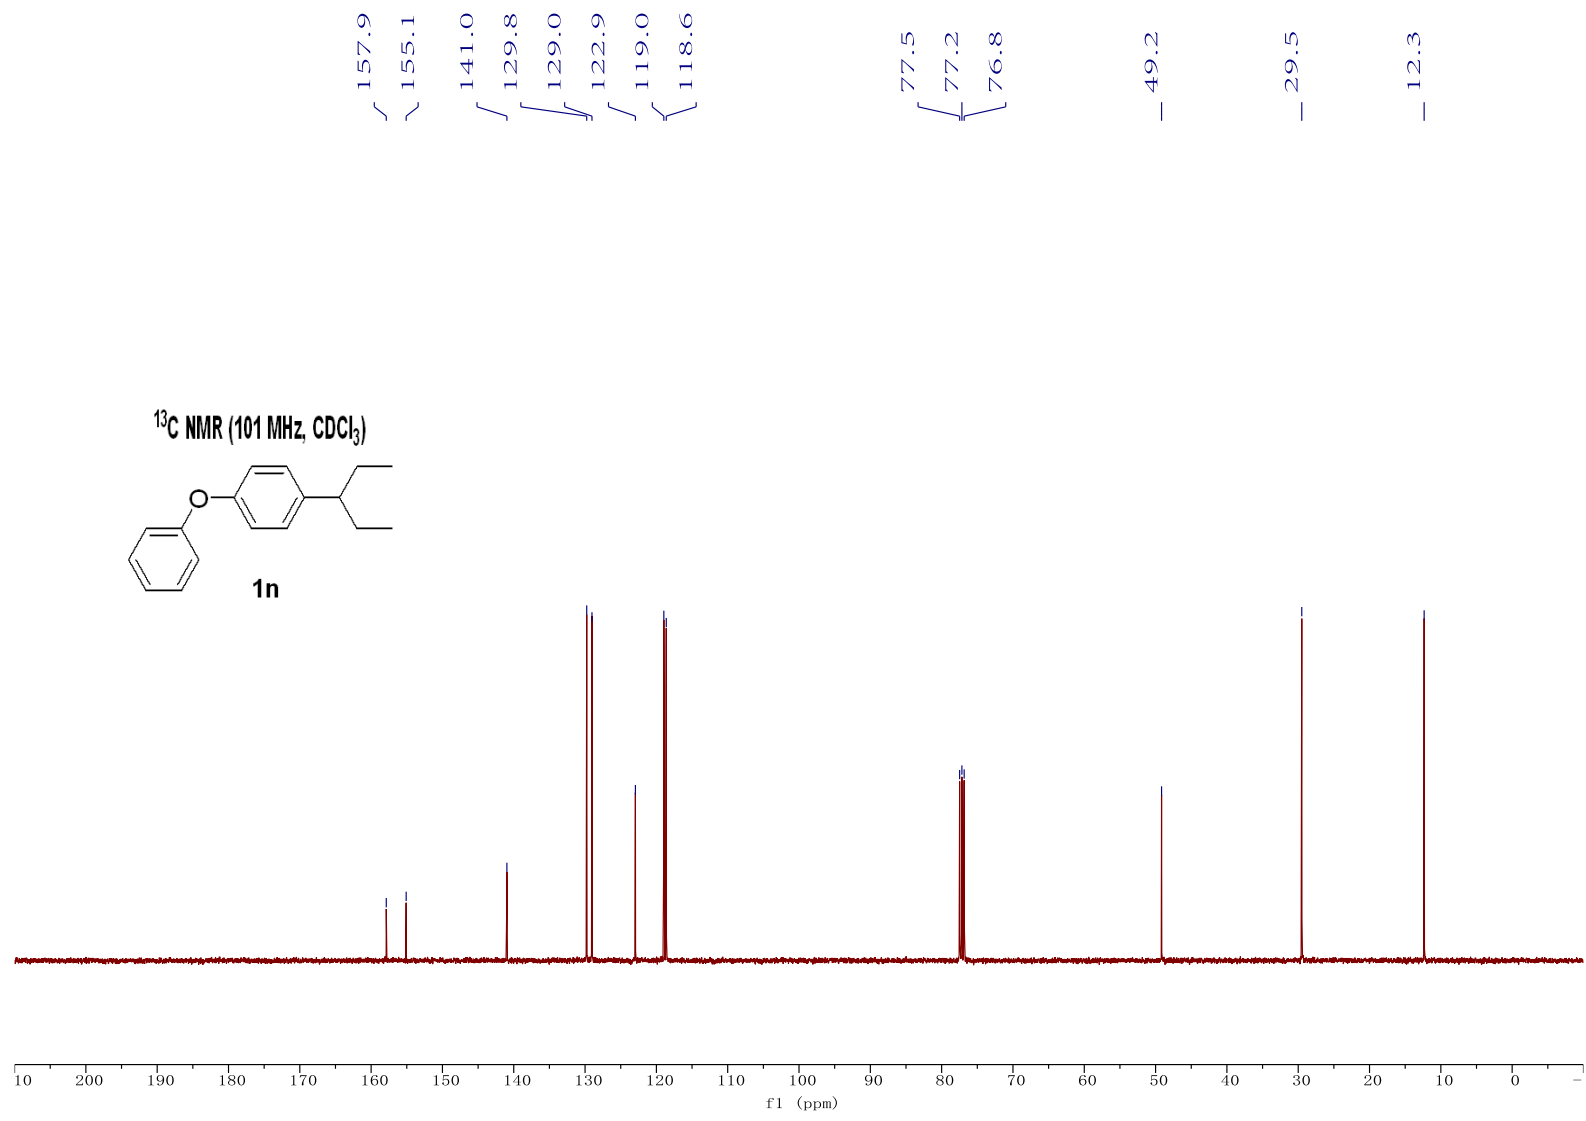

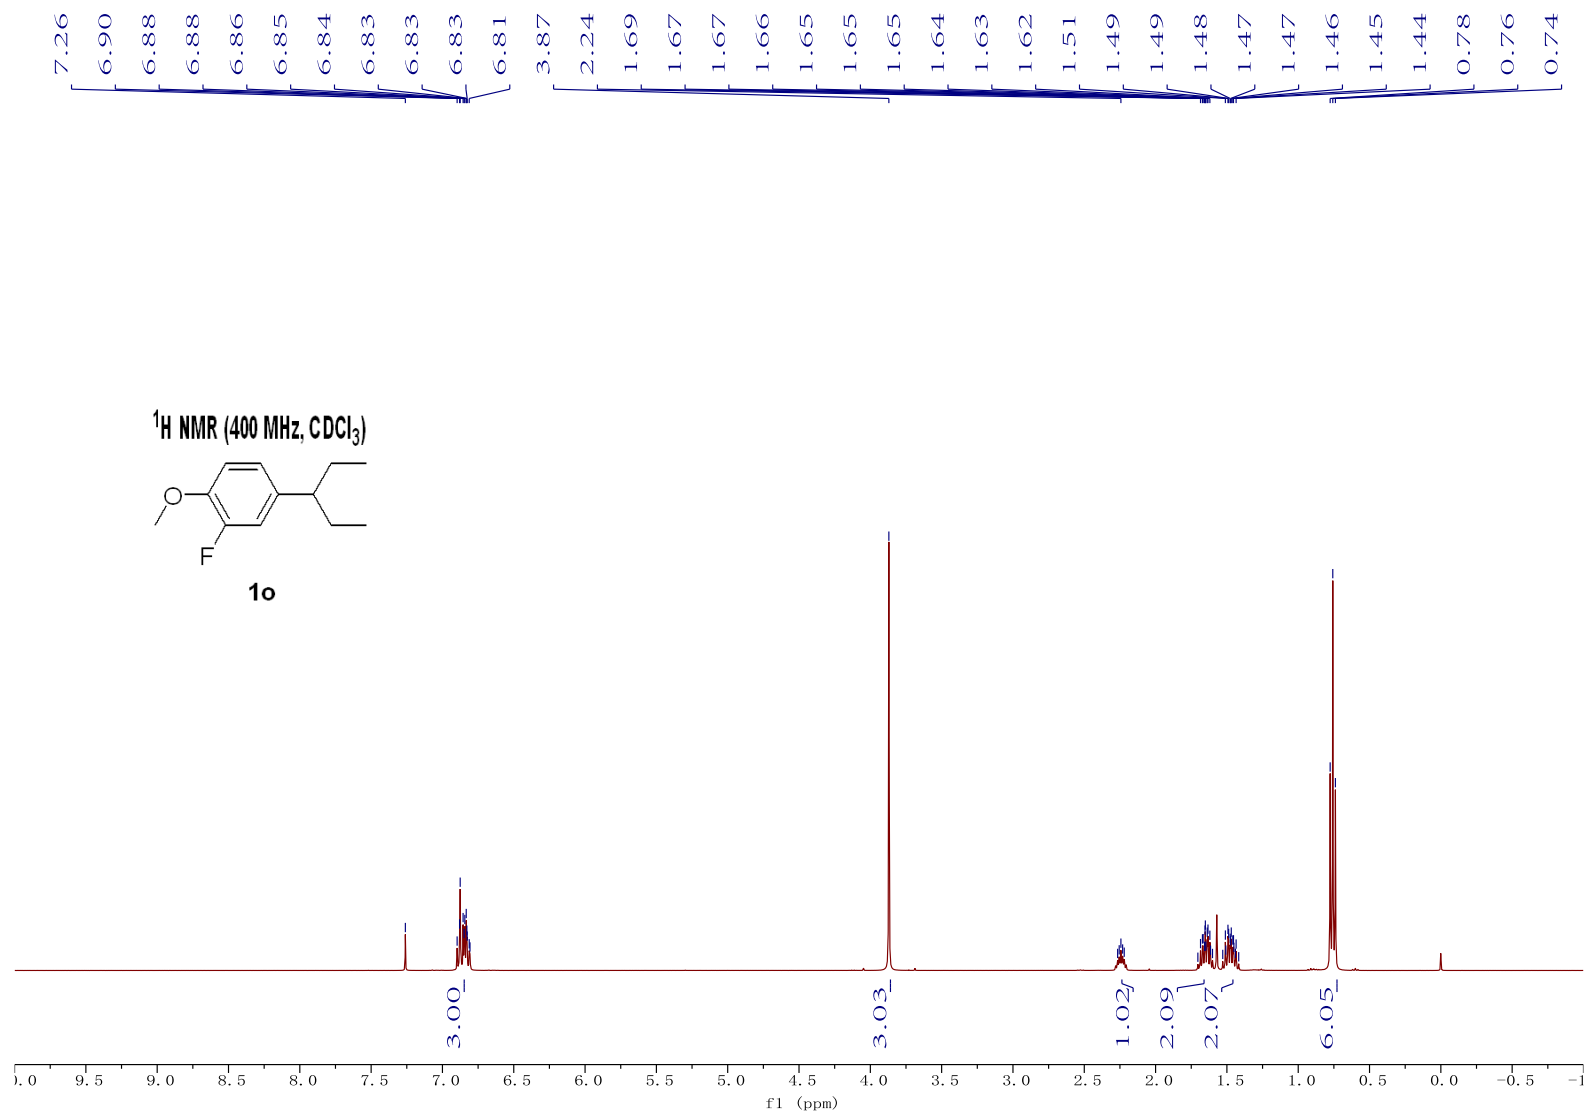

<sup>13</sup>C NMR (101 MHz, CDCl<sub>3</sub>)

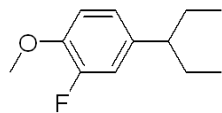

**1o**

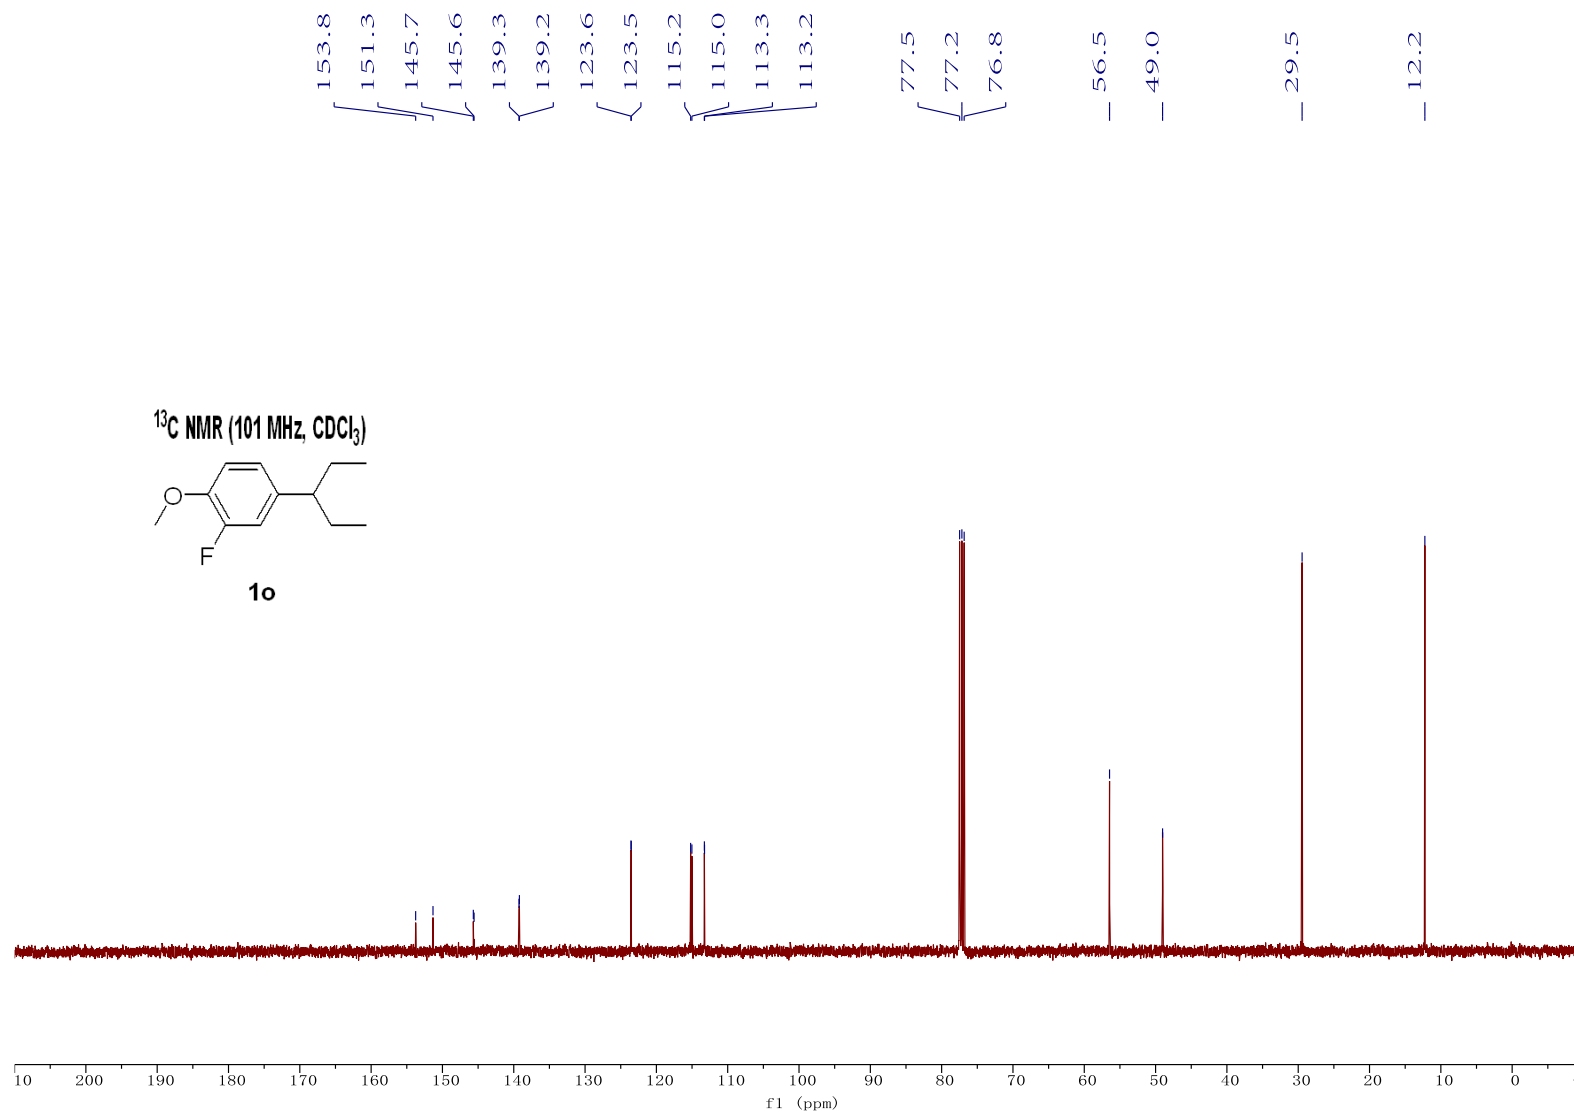

<sup>19</sup>F NMR (376 MHz, CDCl<sub>3</sub>)

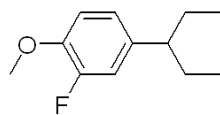

**1o**

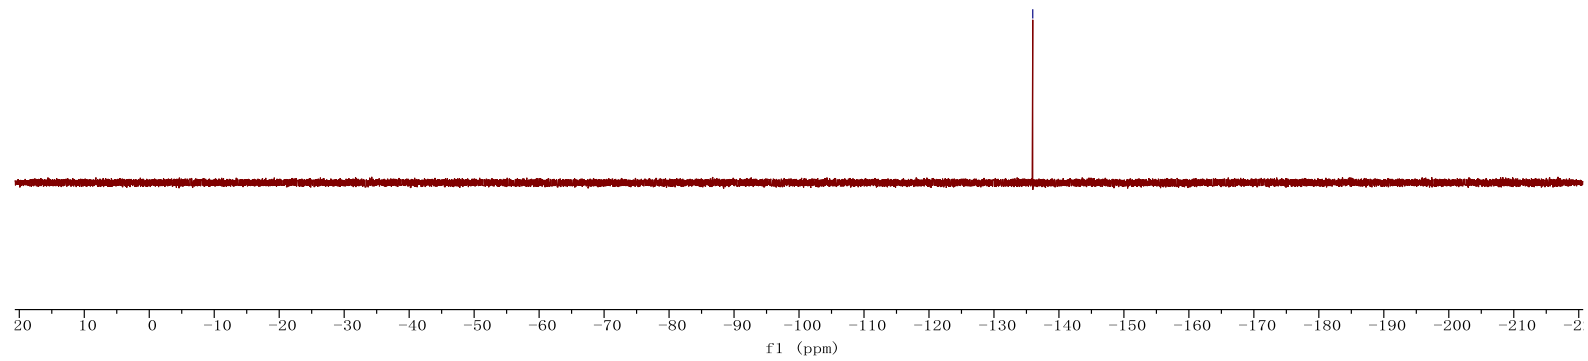

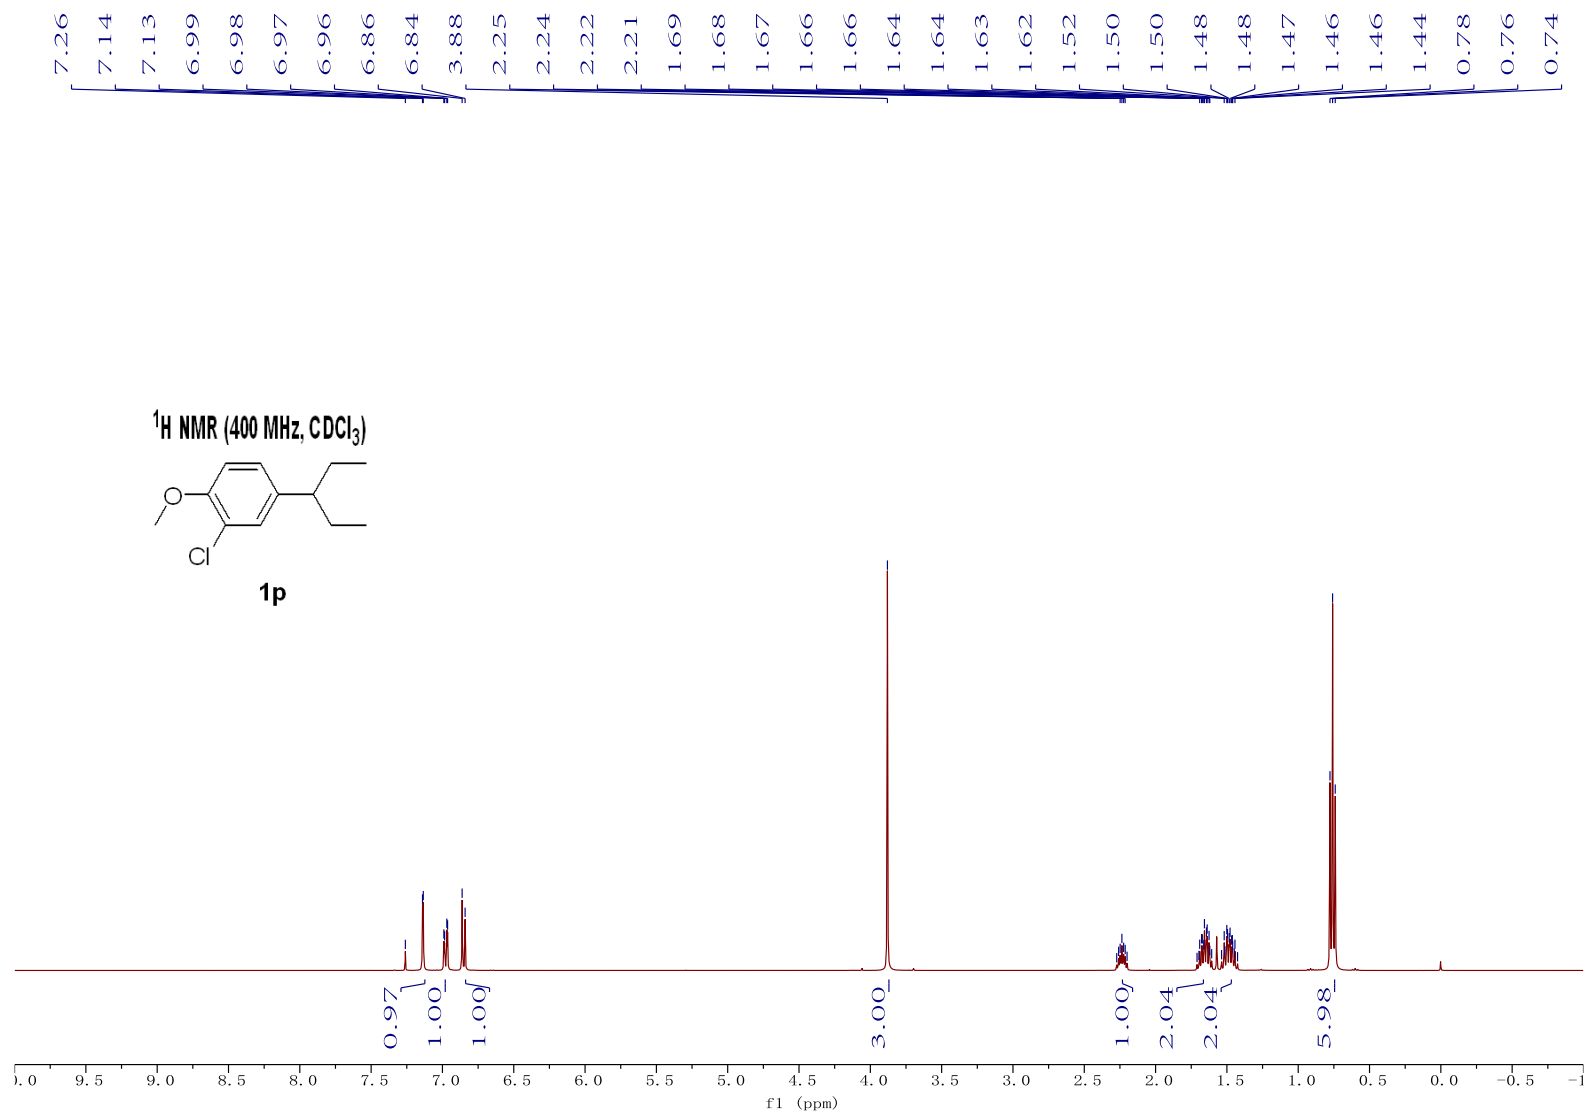

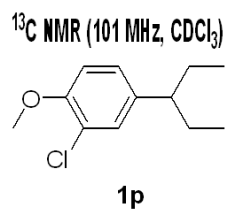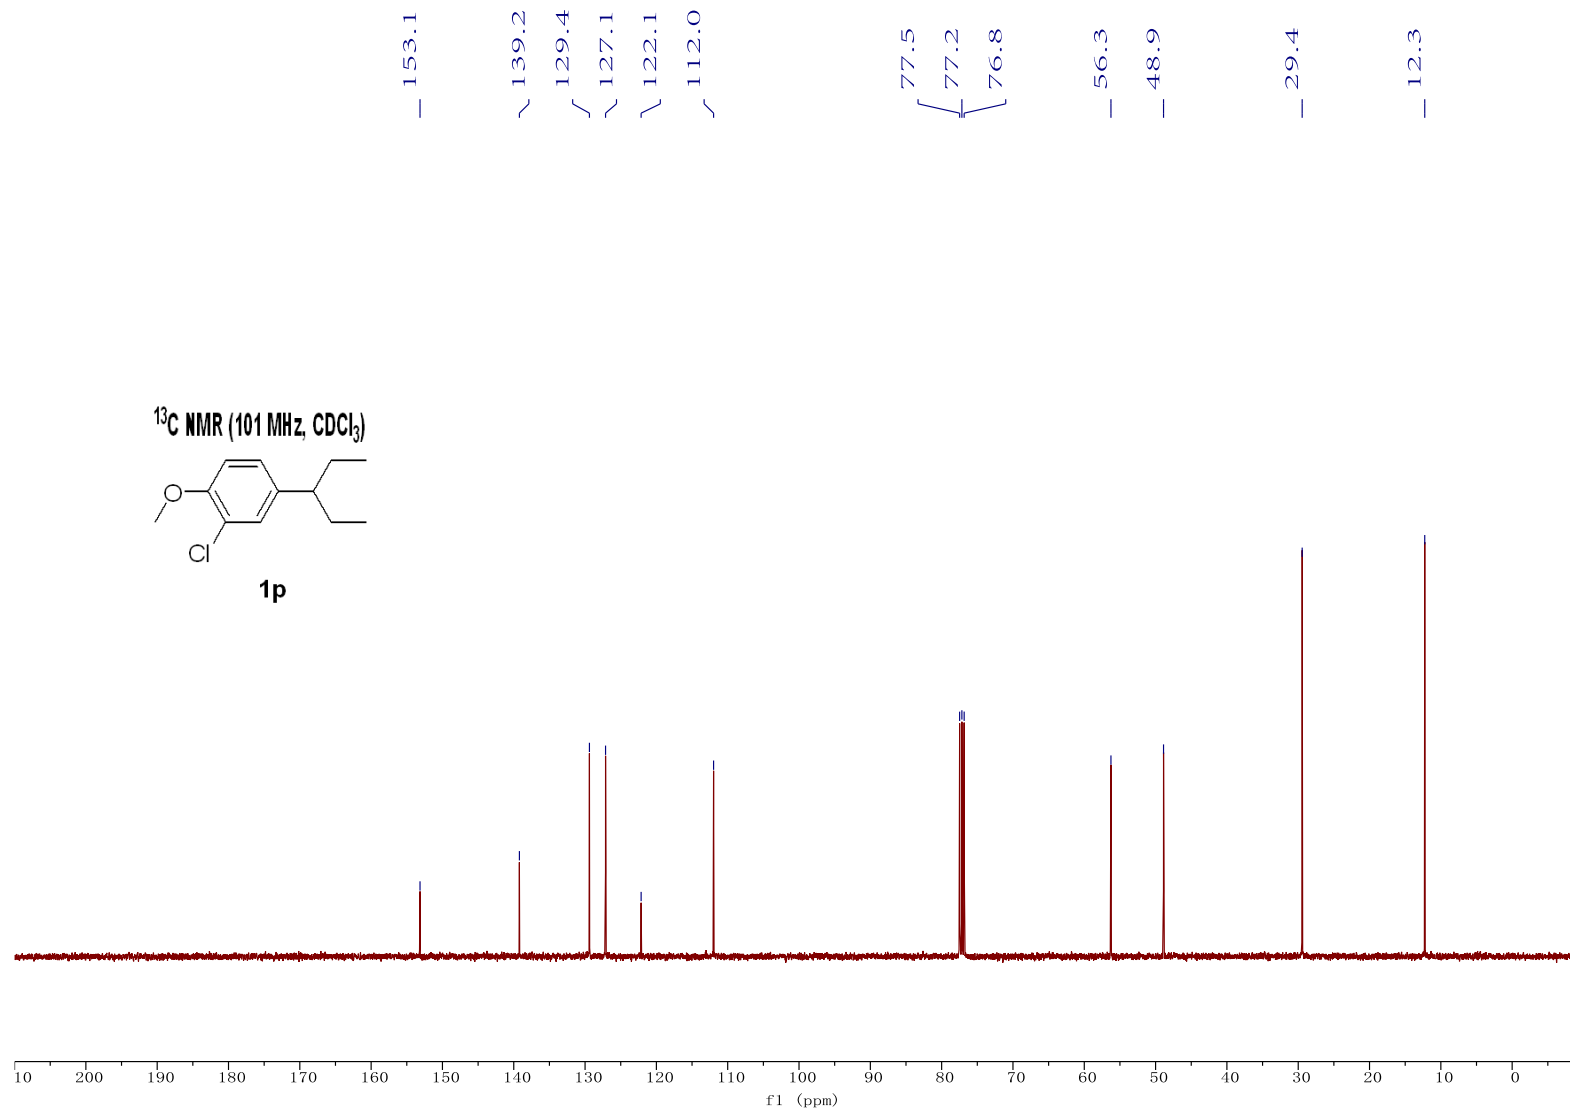

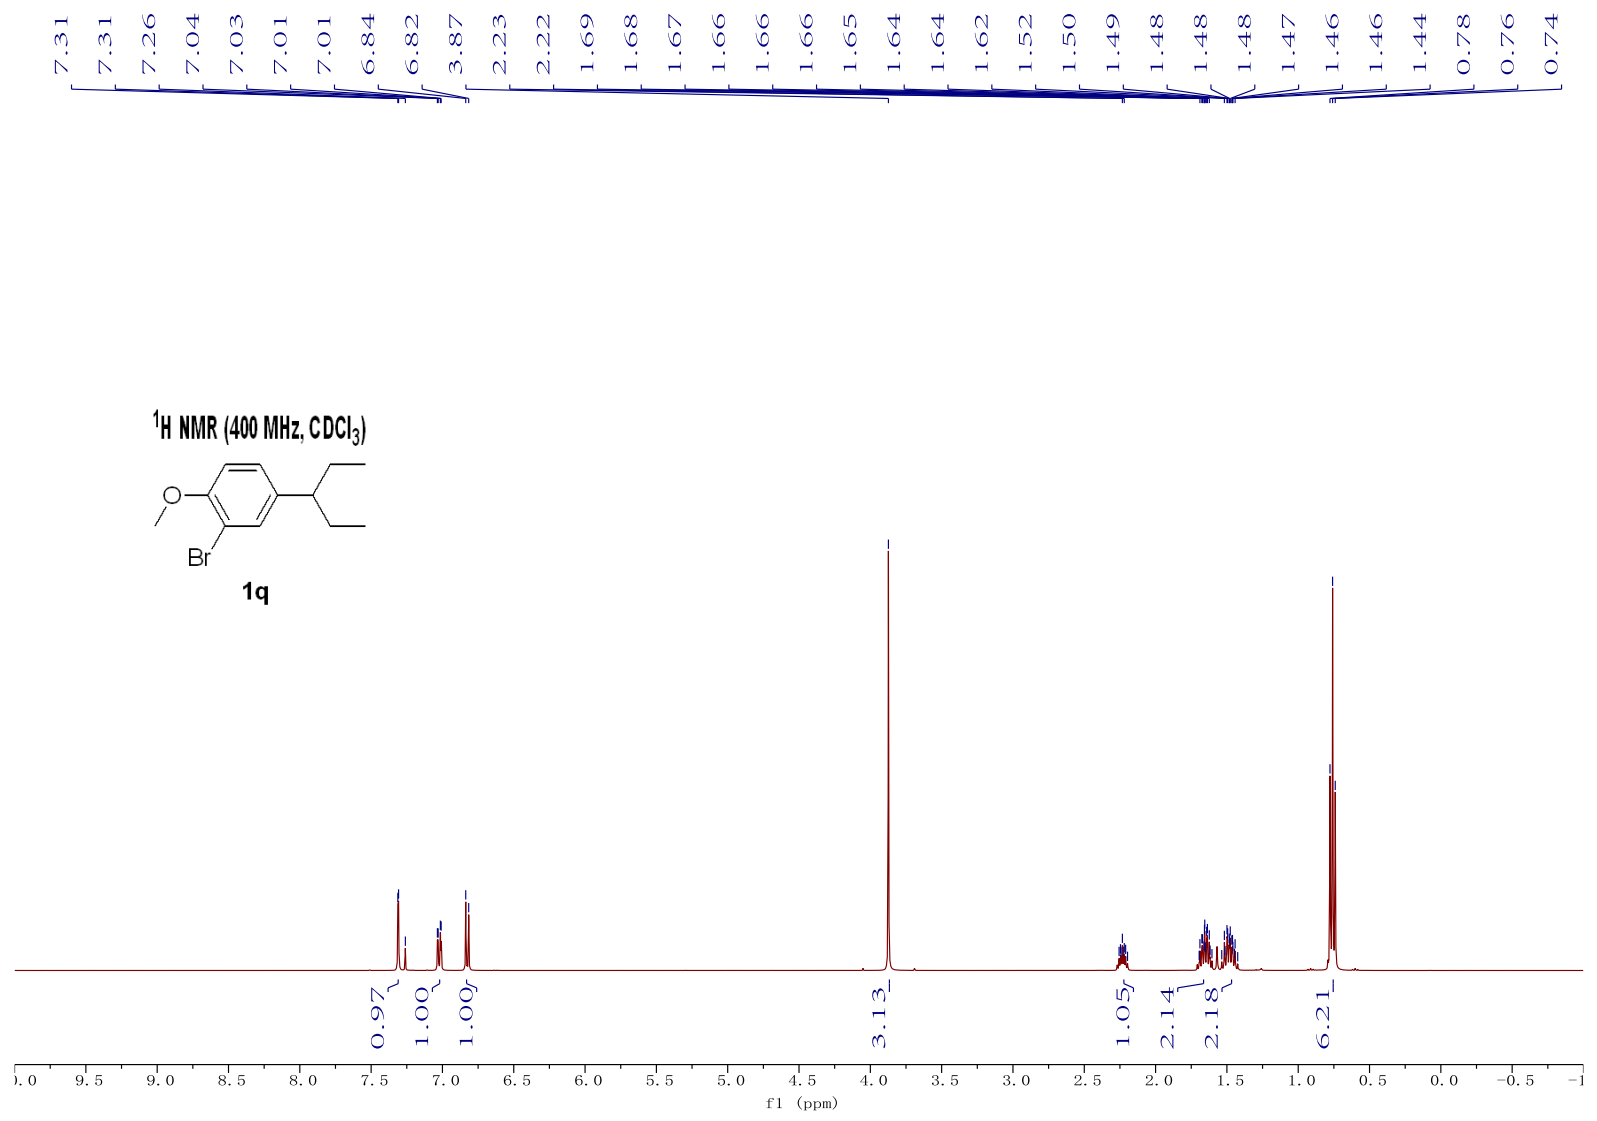



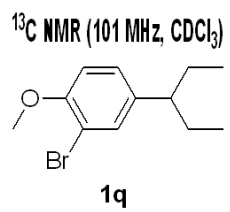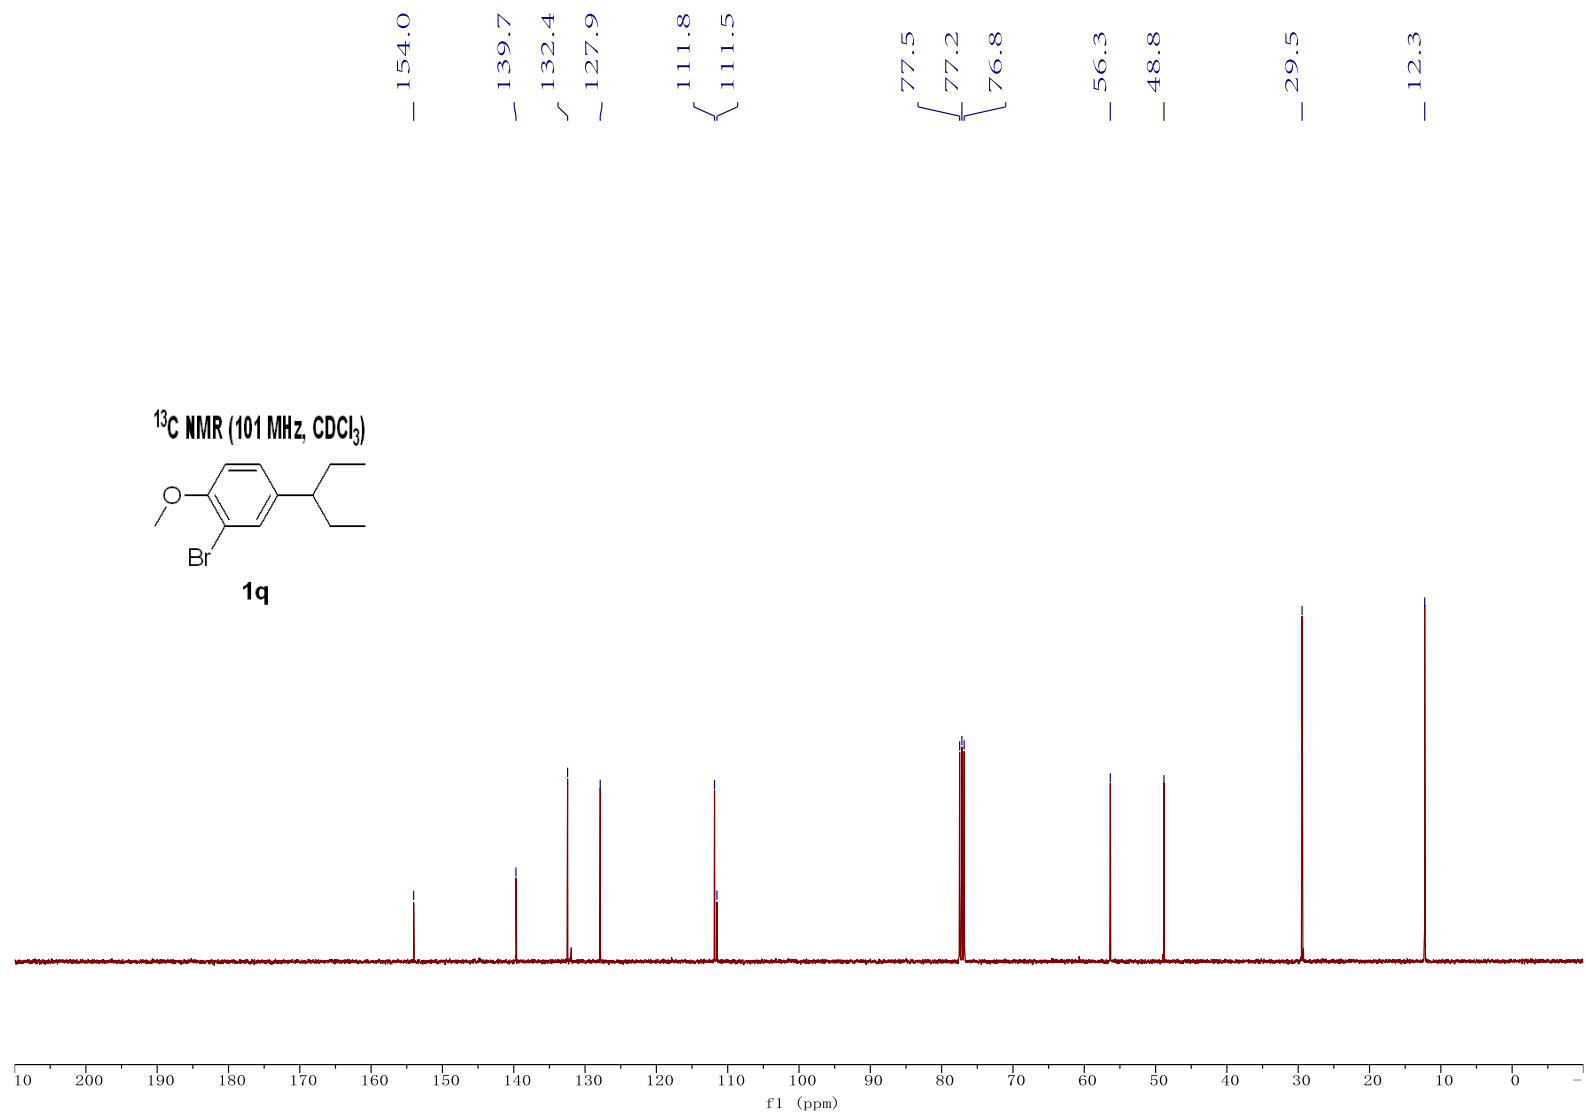

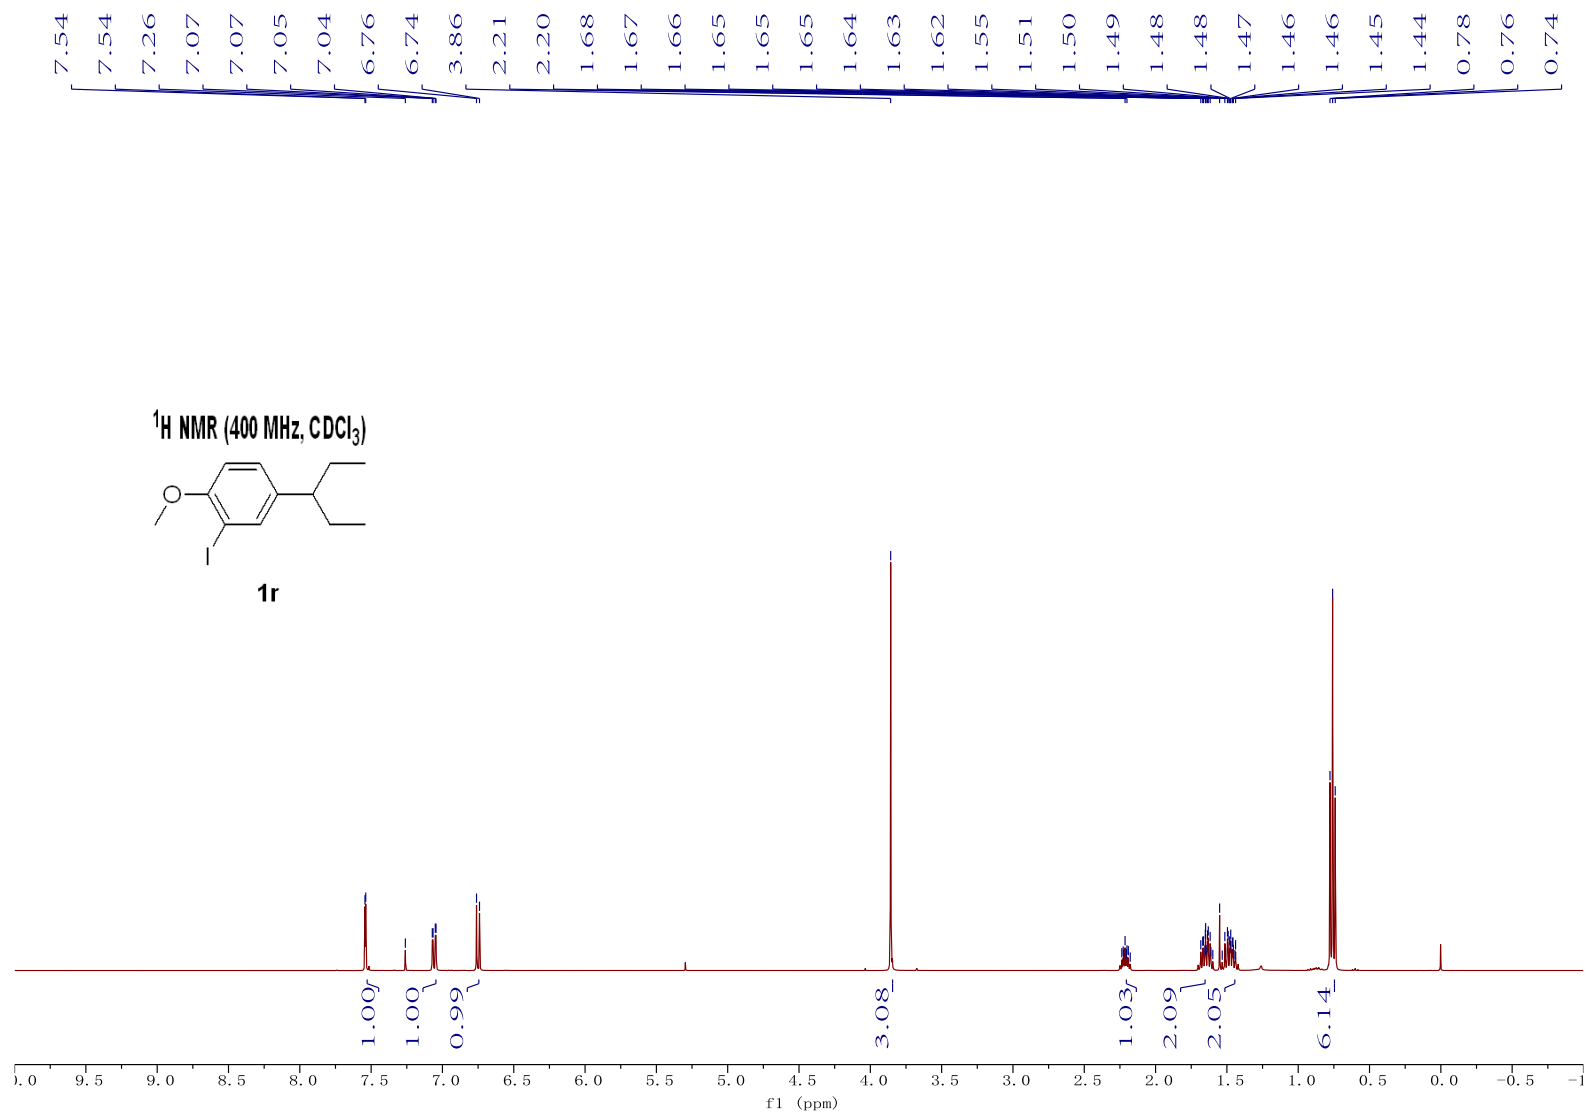

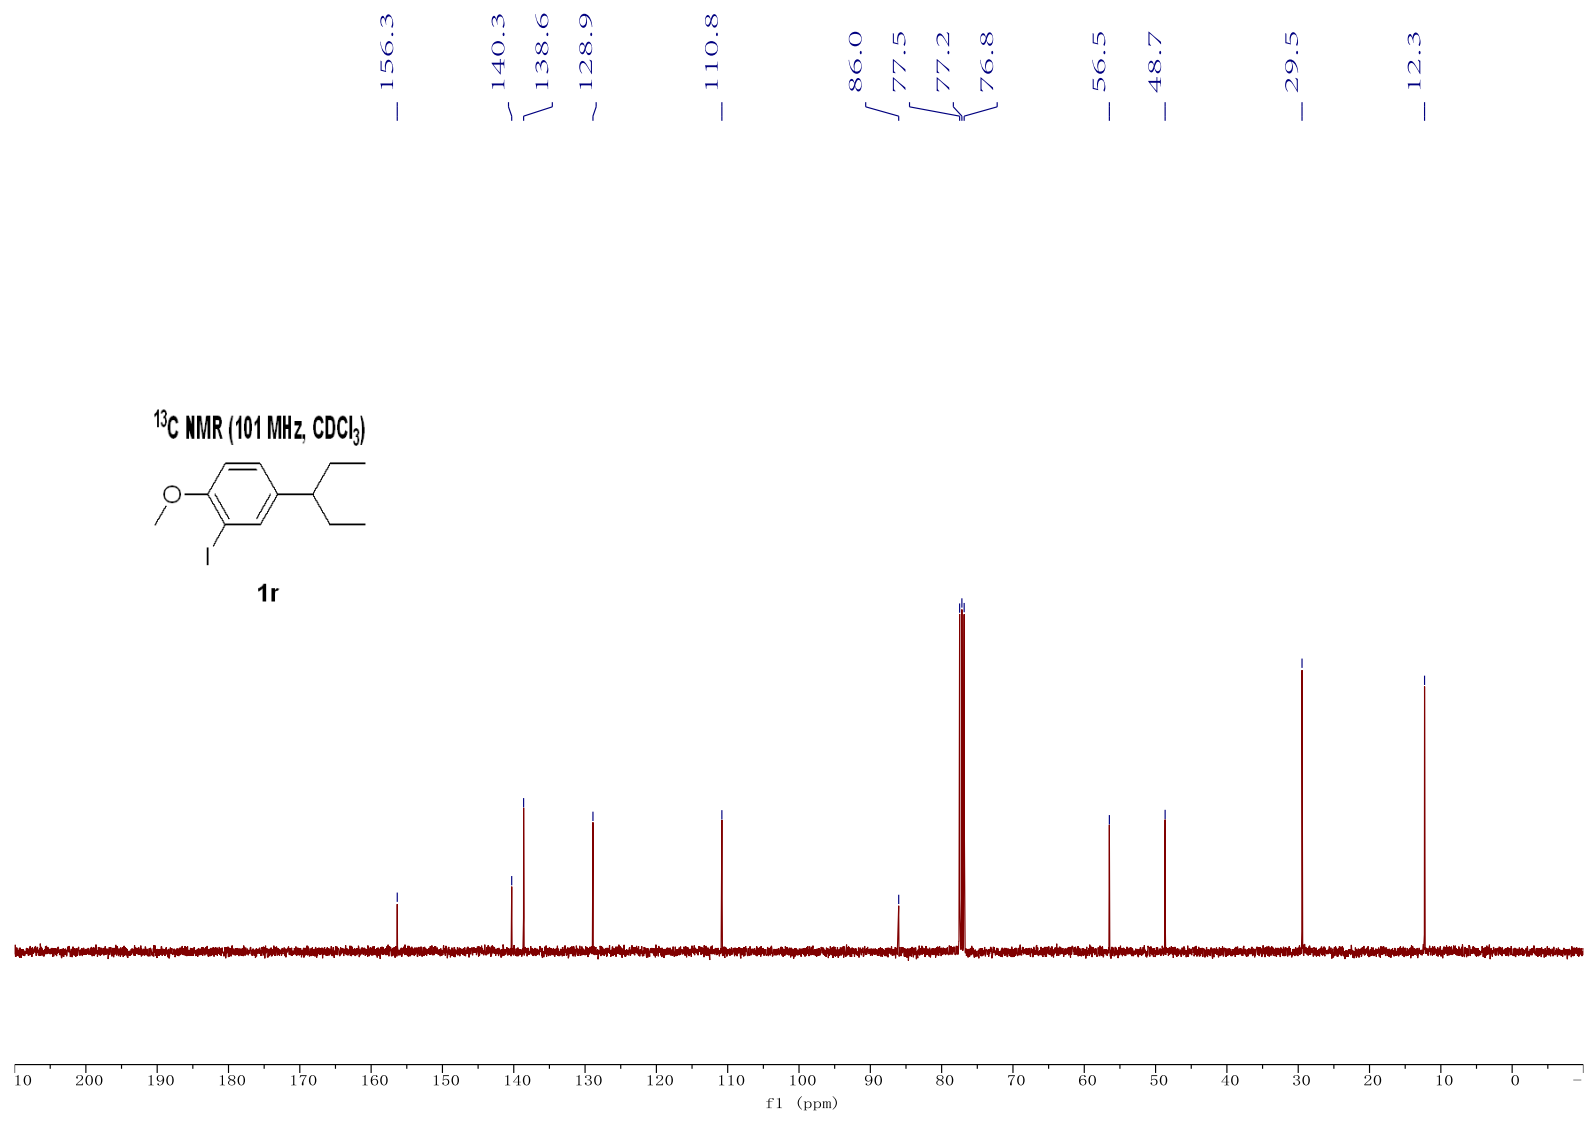

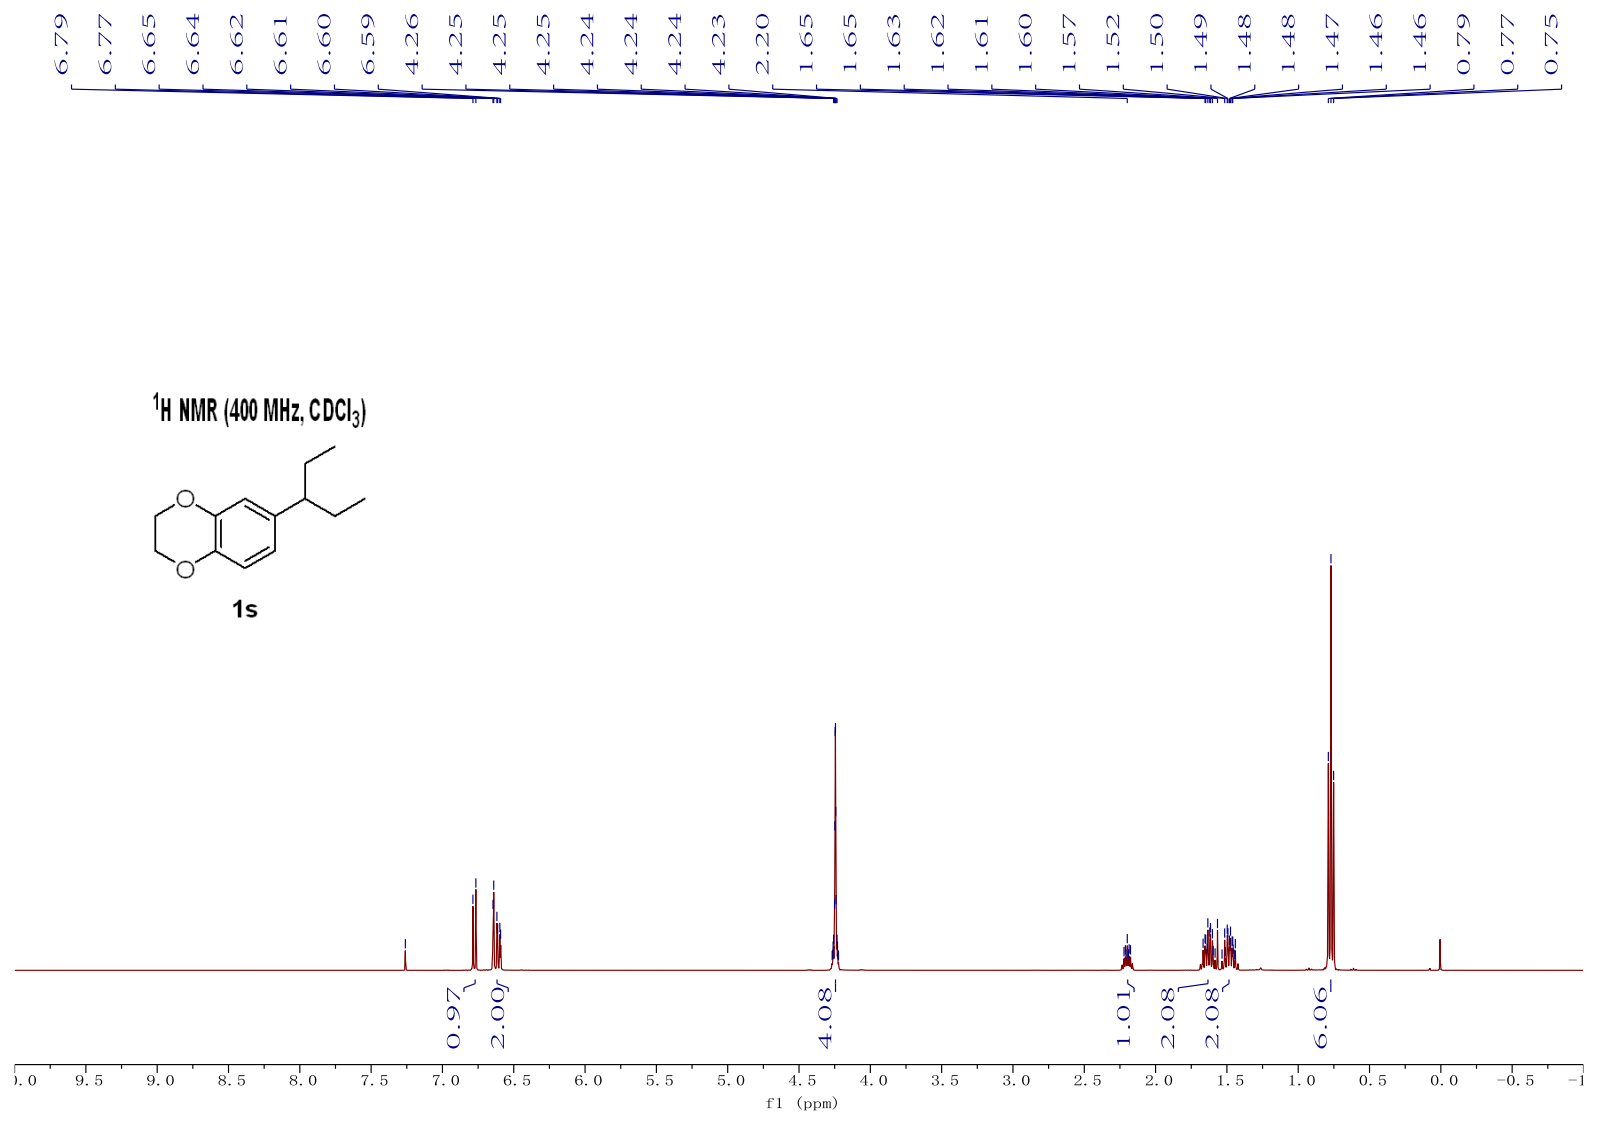

<sup>13</sup>C NMR (101 MHz, CDCl<sub>3</sub>)

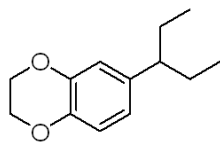

**1s**

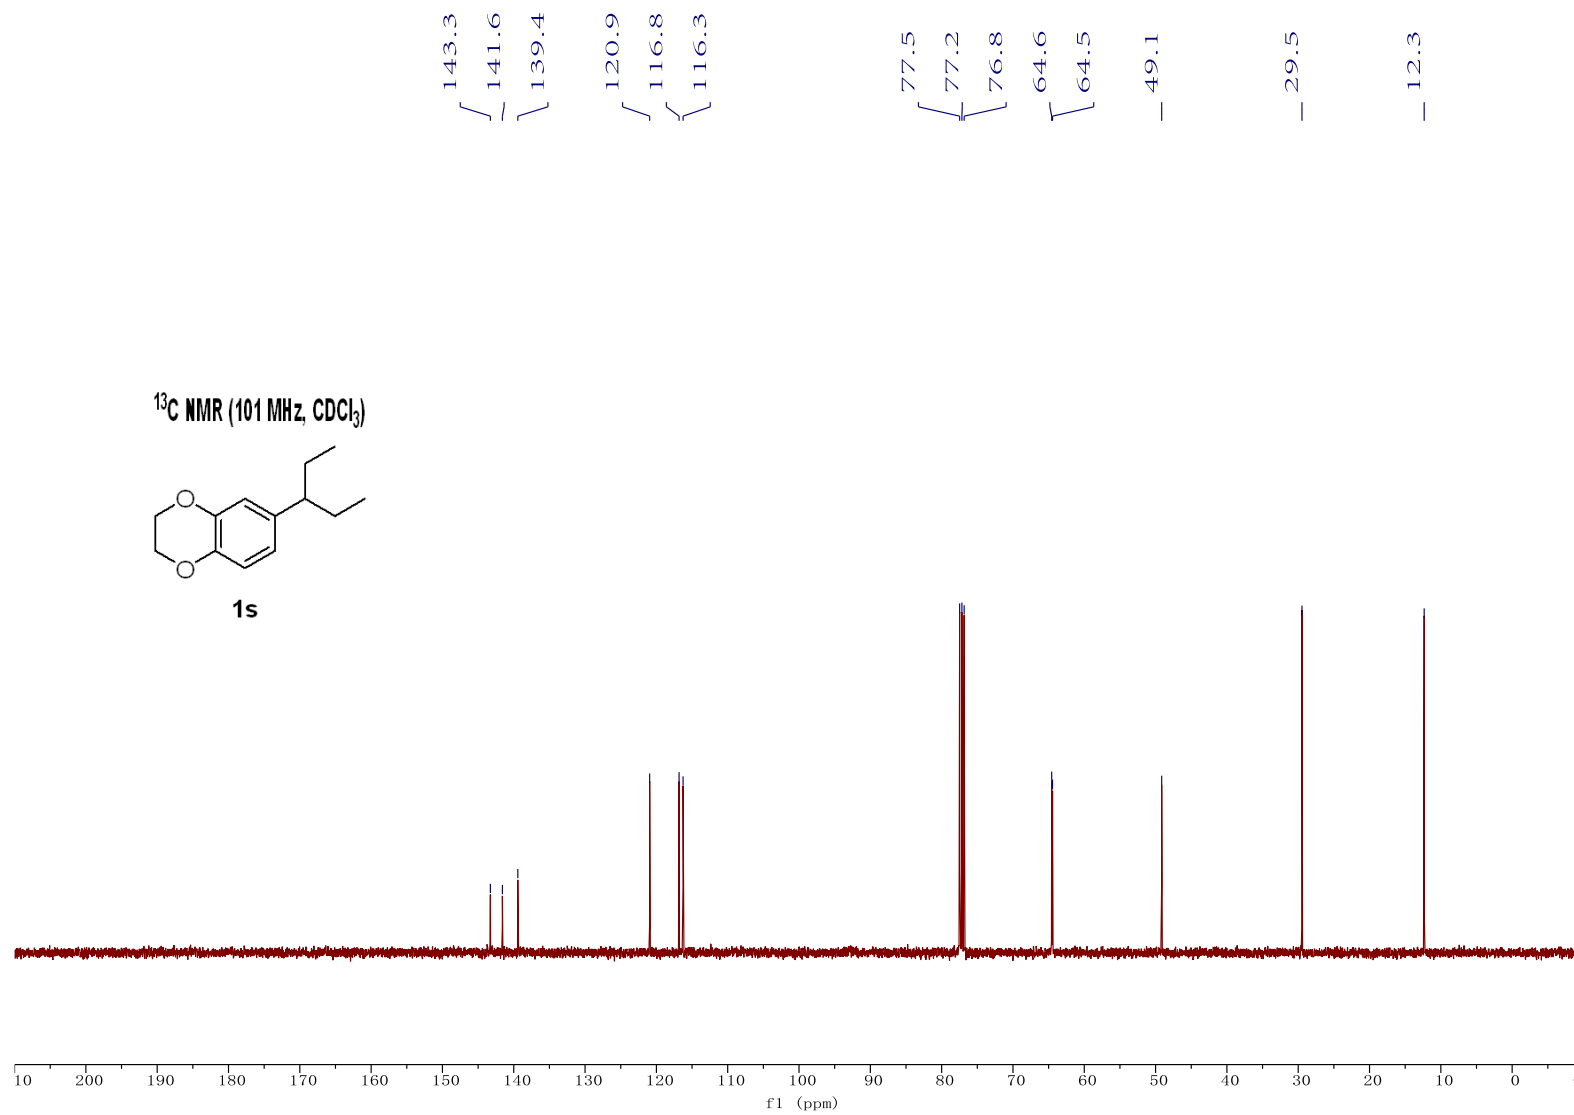

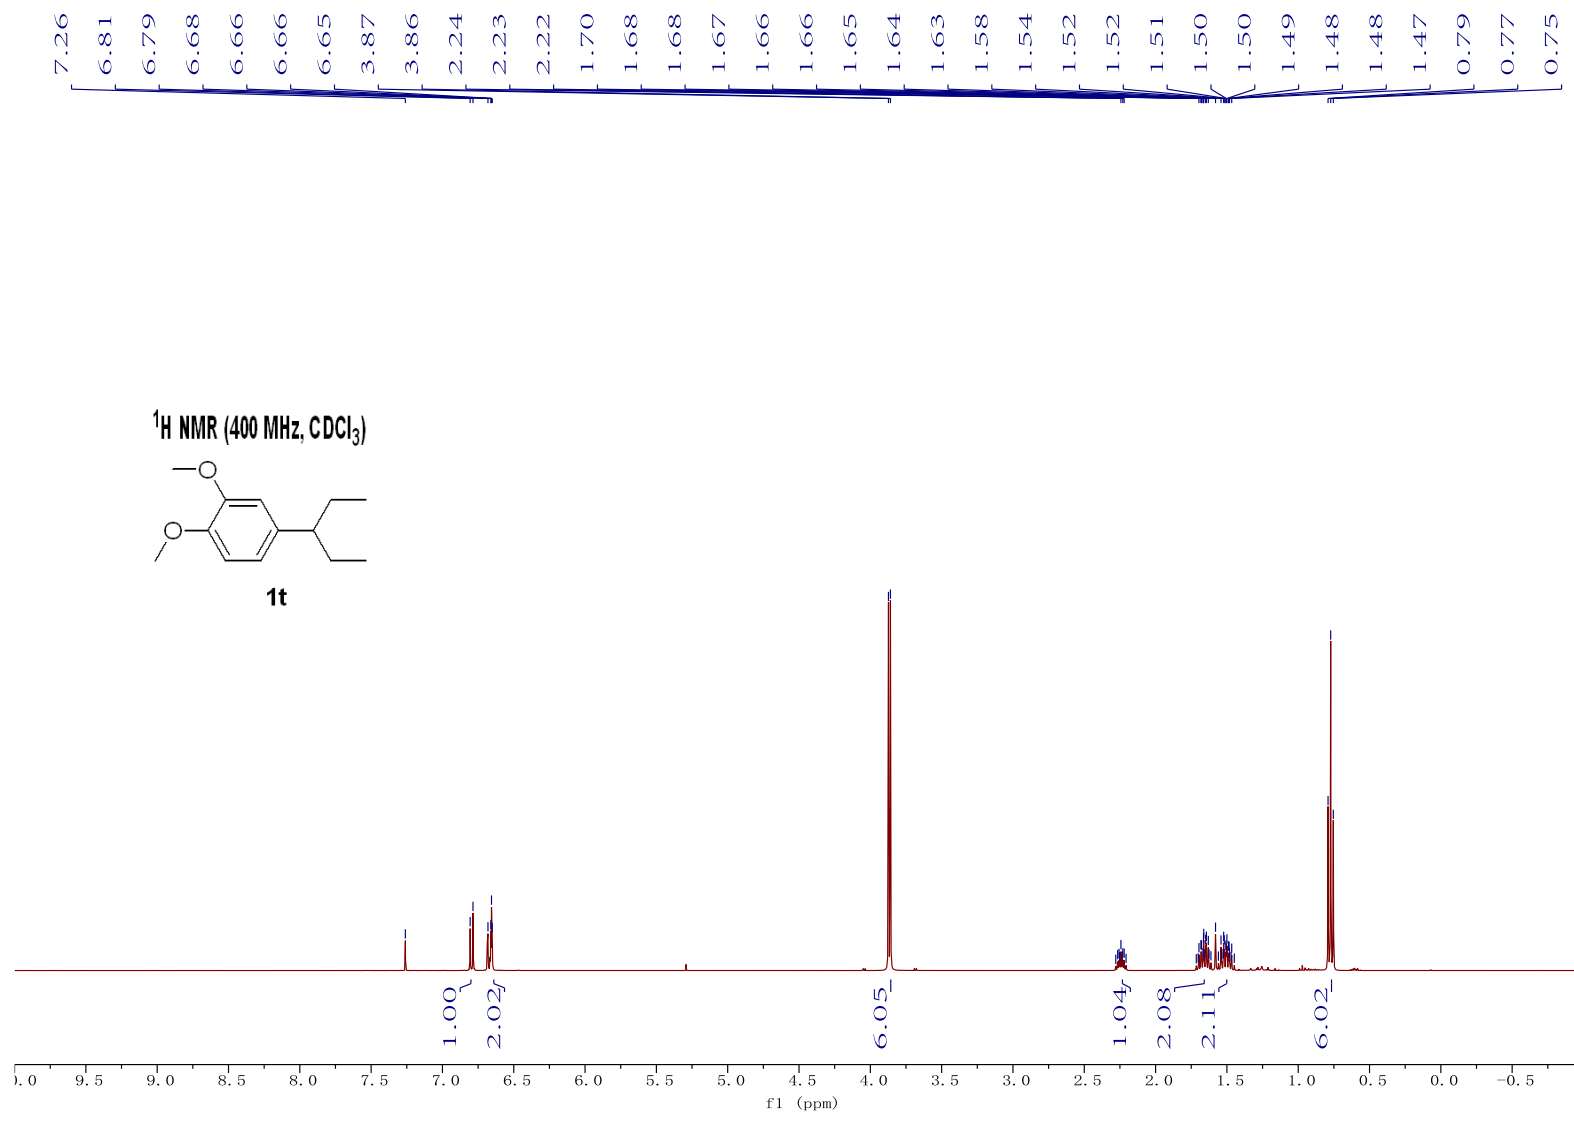

<sup>13</sup>C NMR (101 MHz, CDCl<sub>3</sub>)

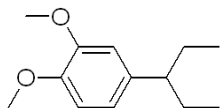

**1t**

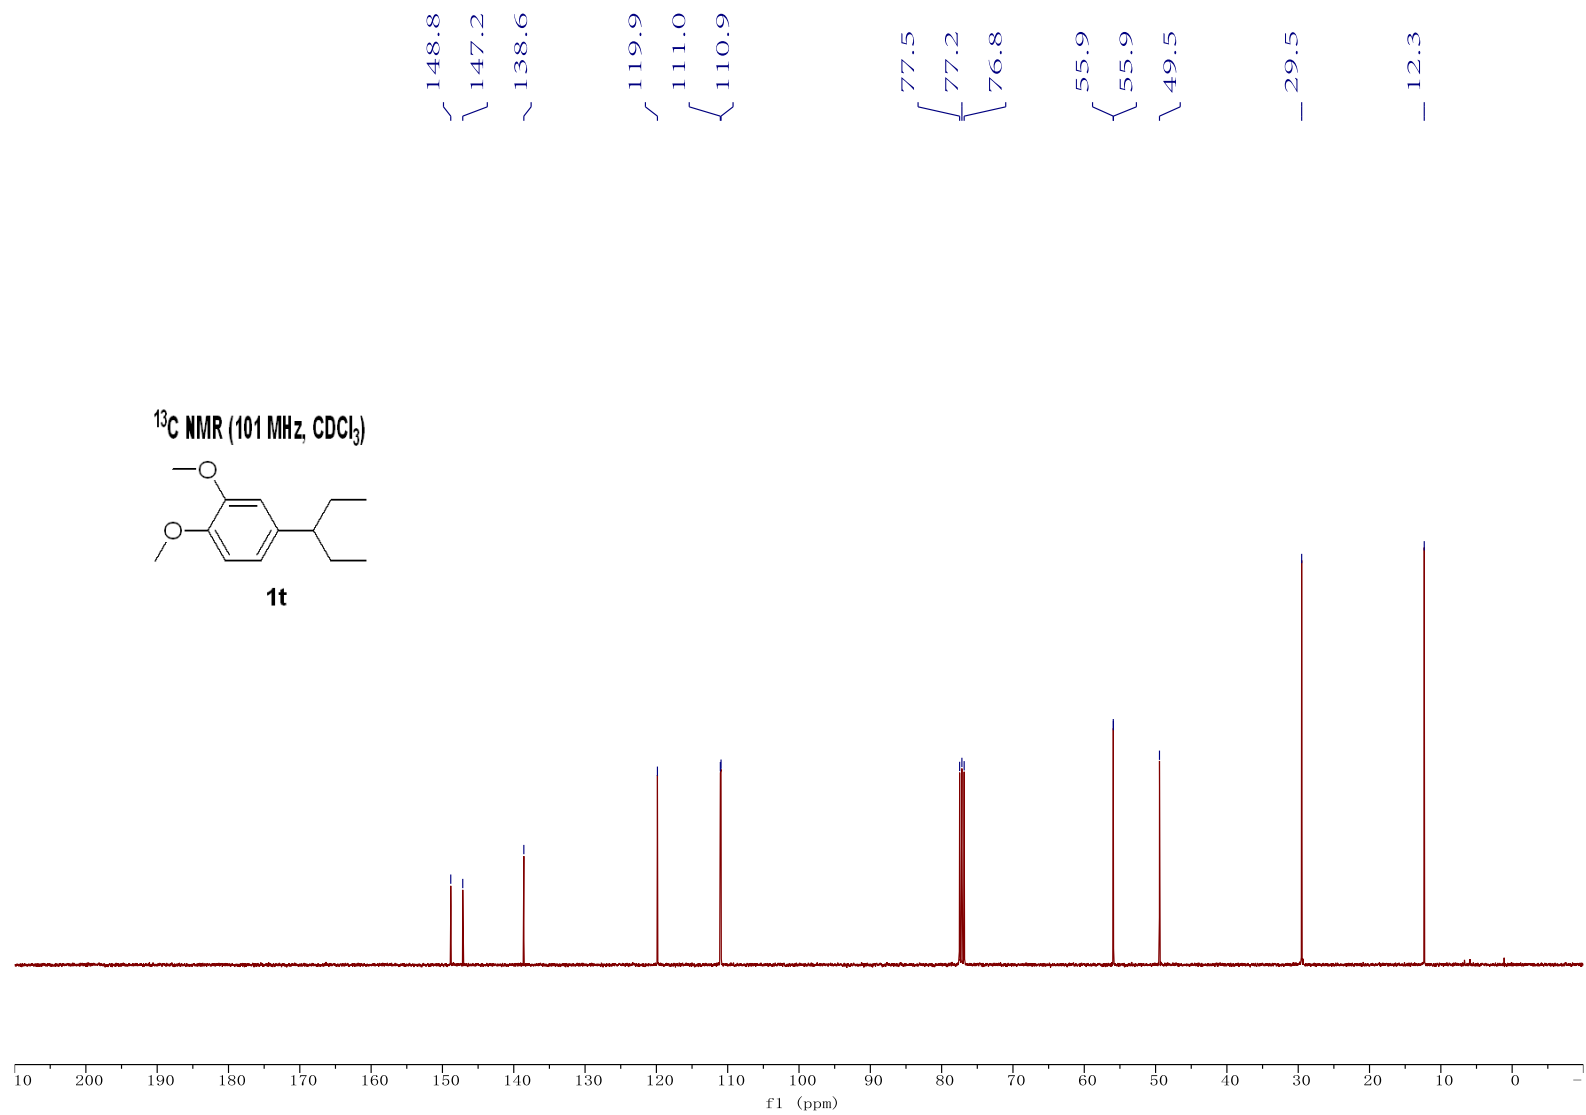

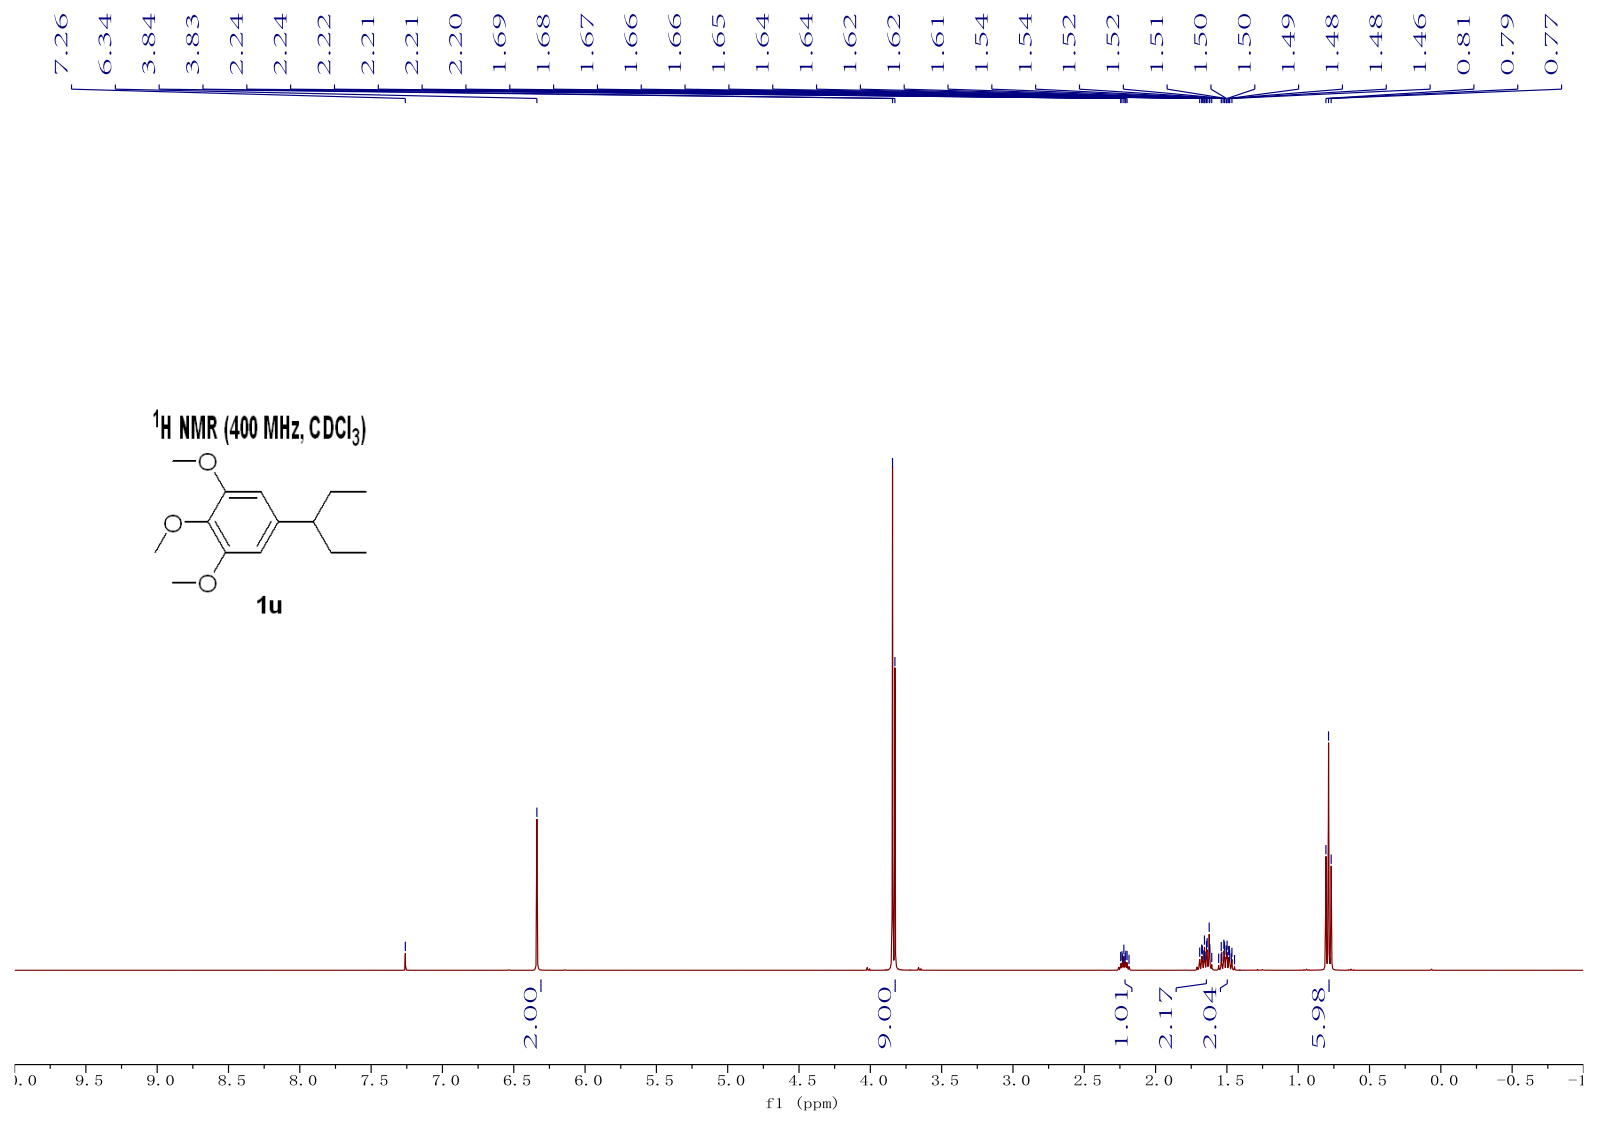



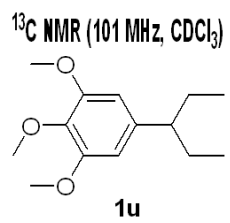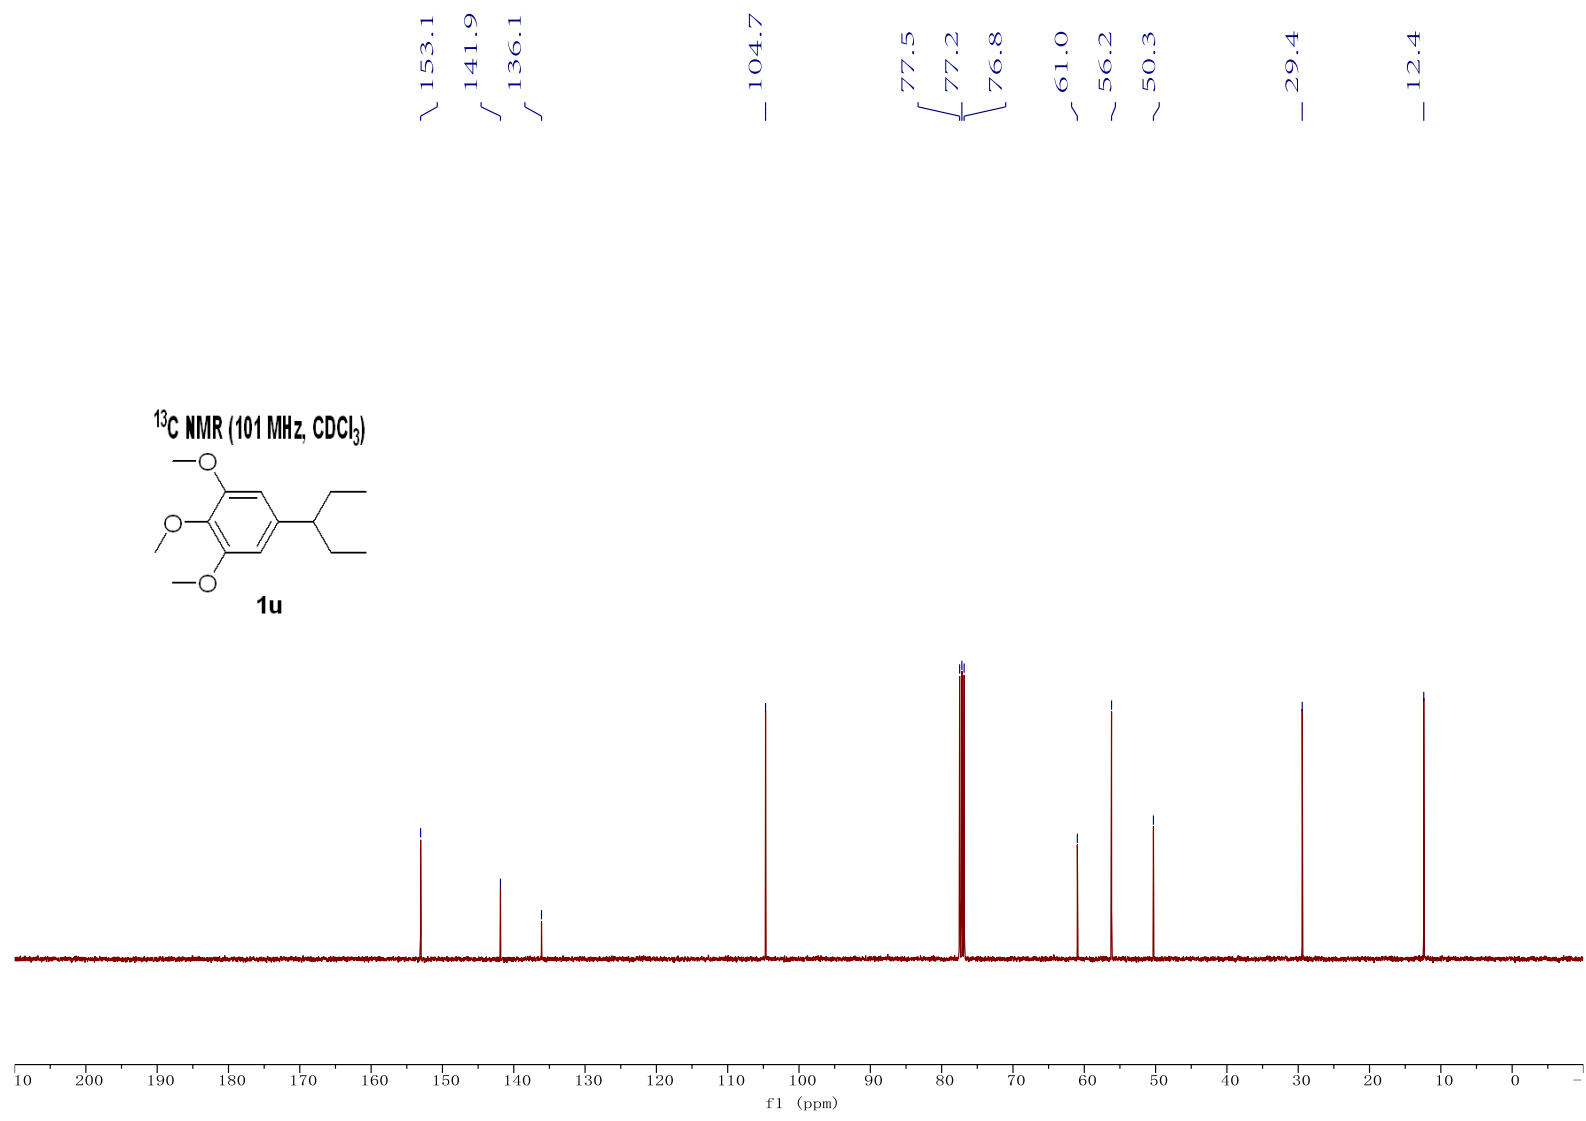

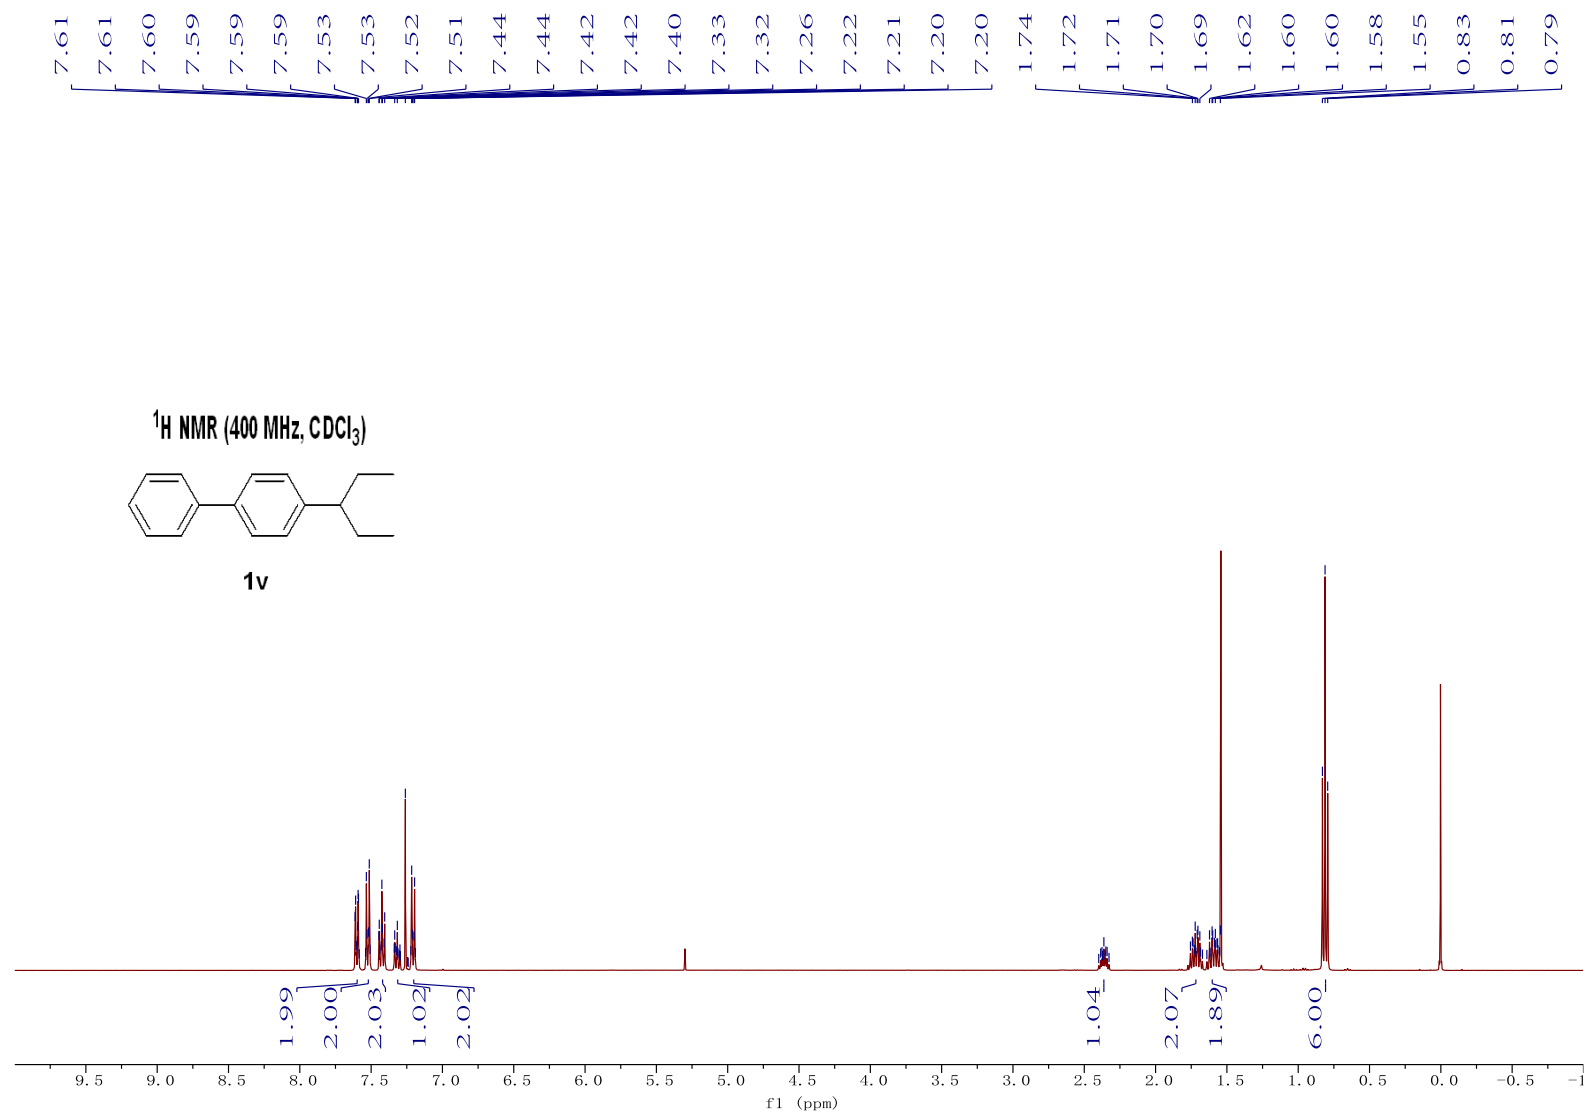

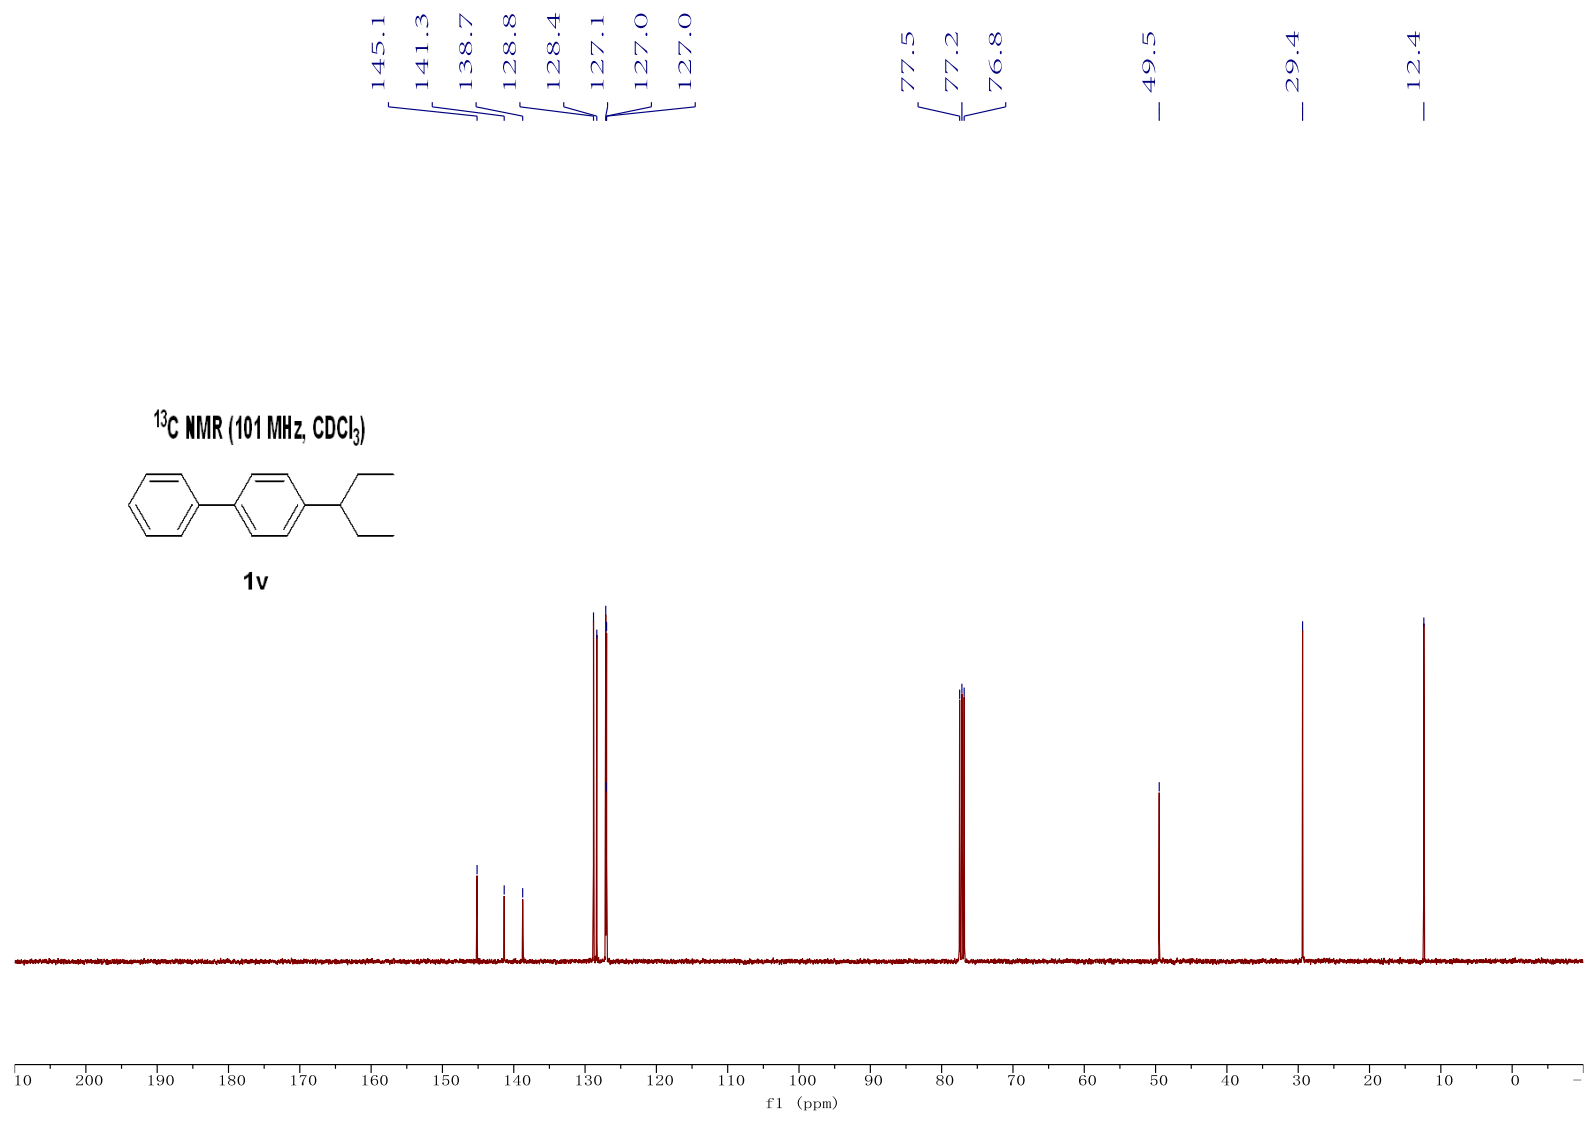

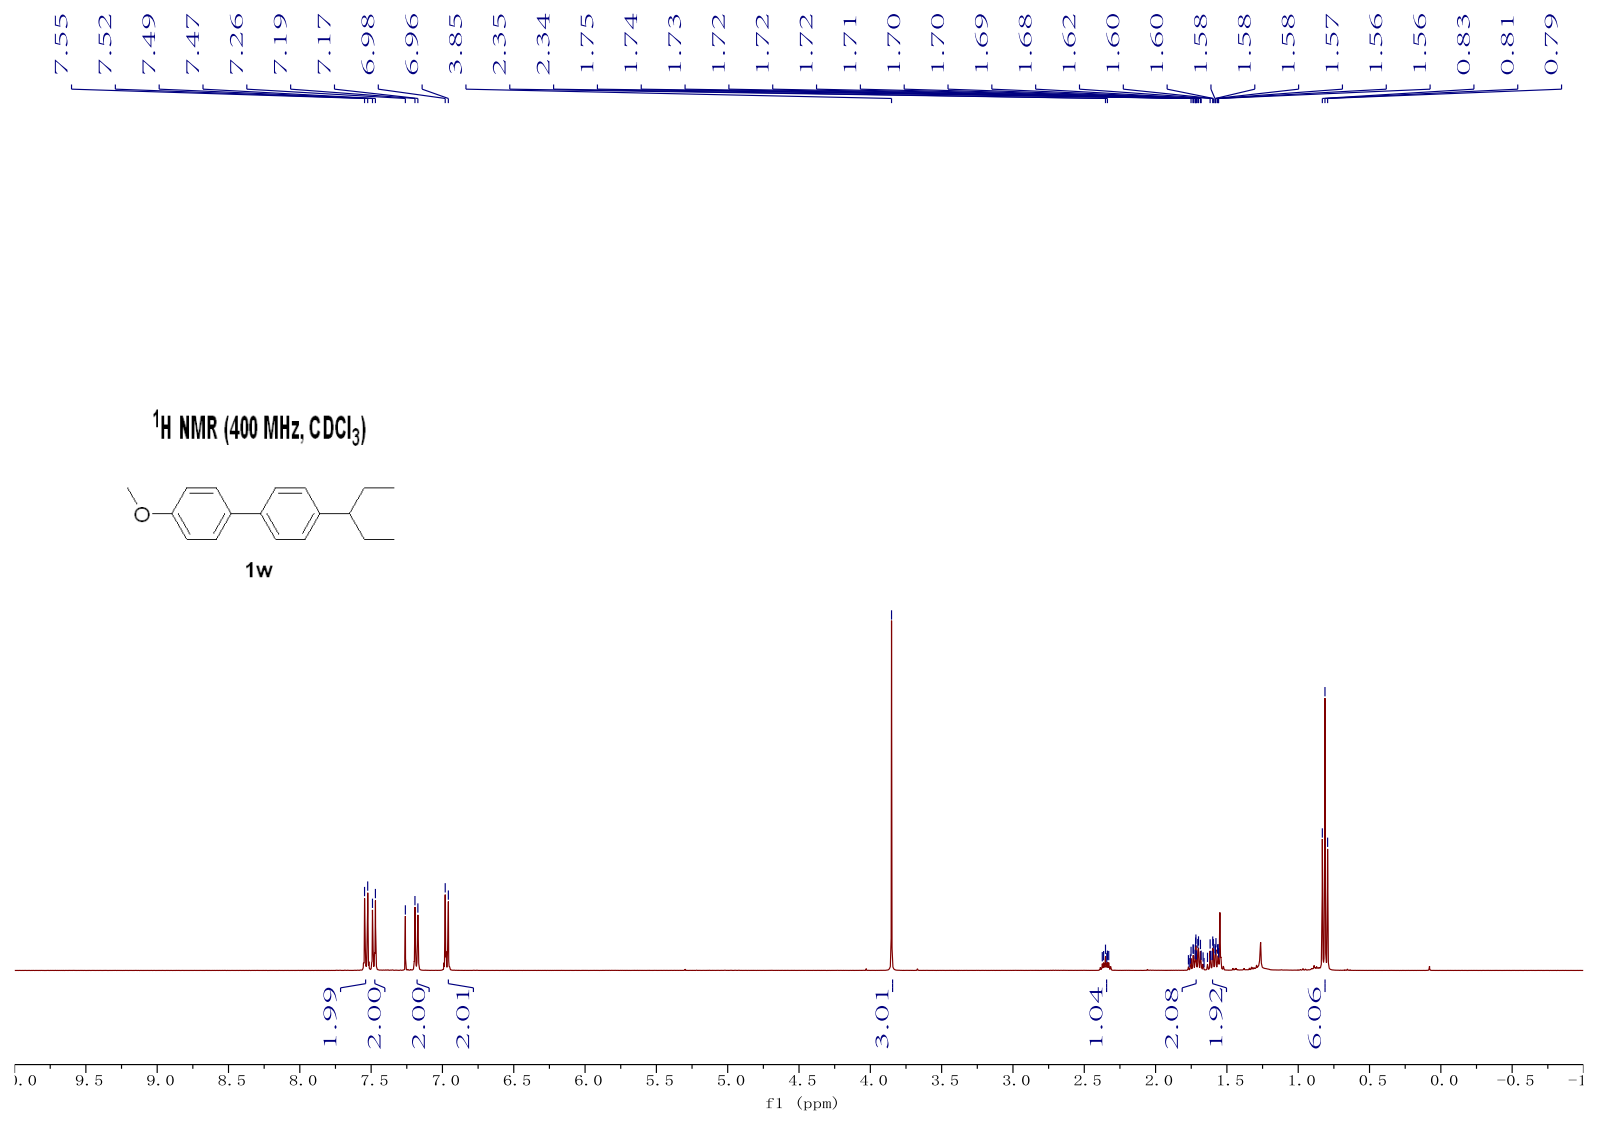

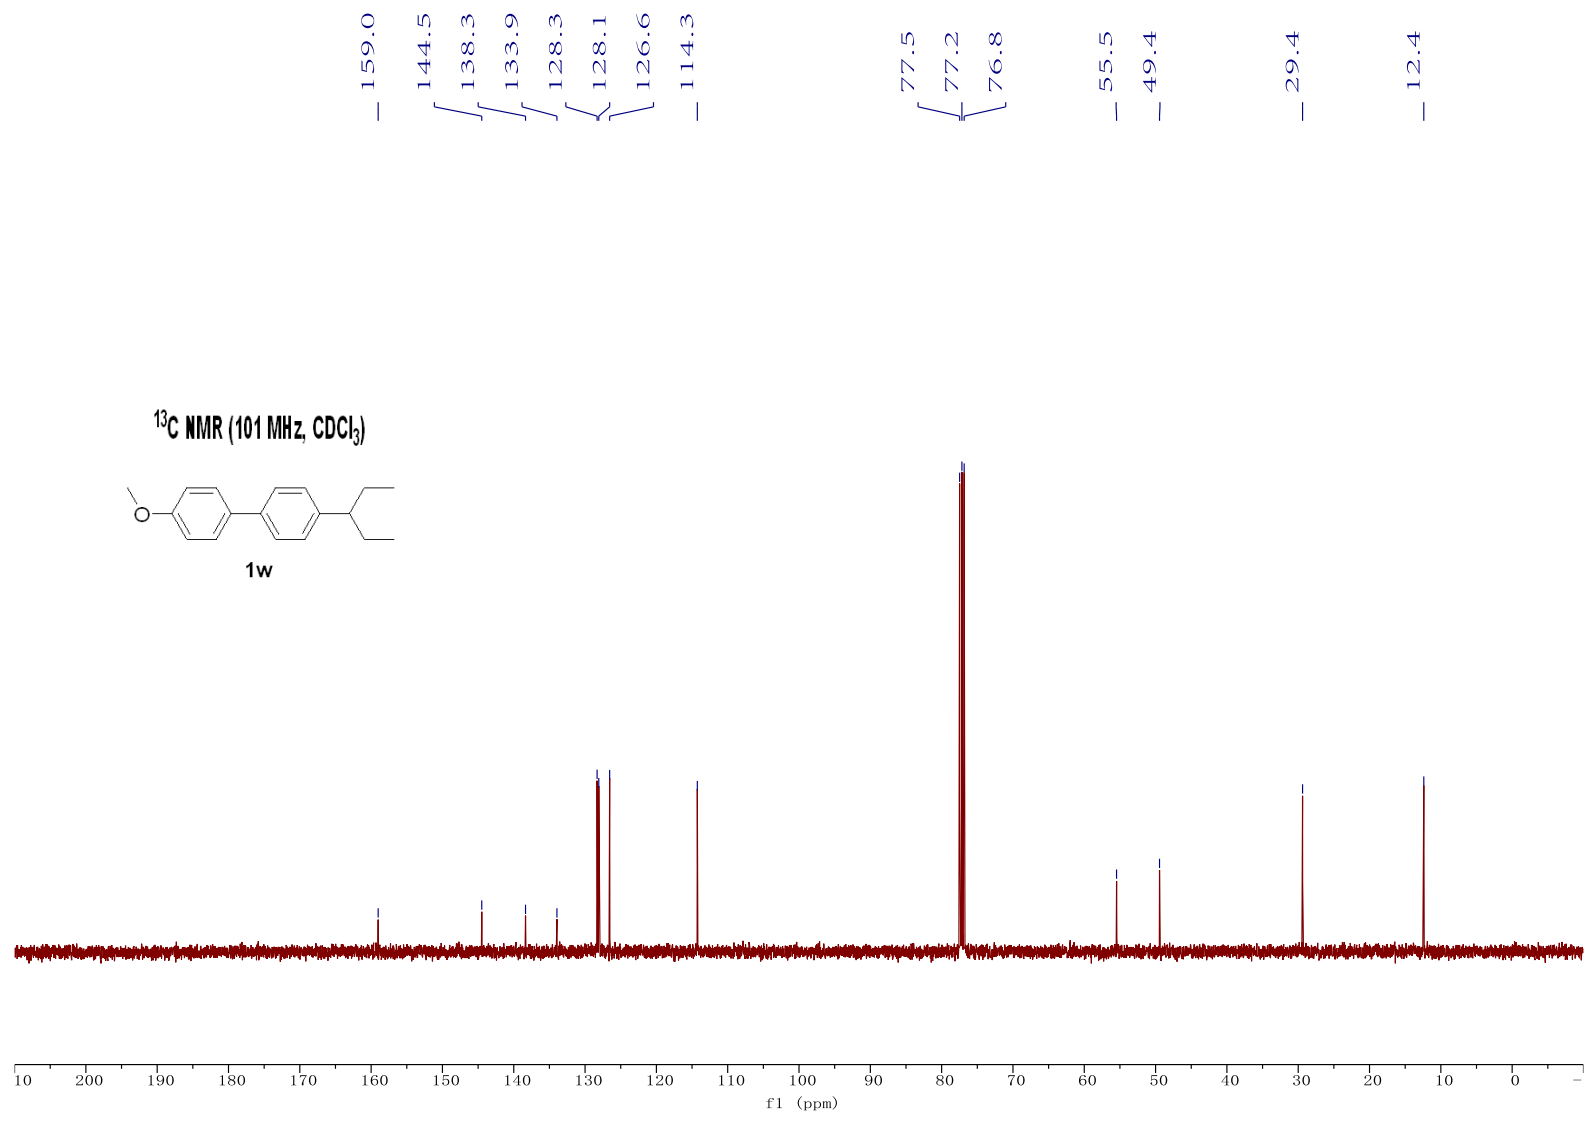

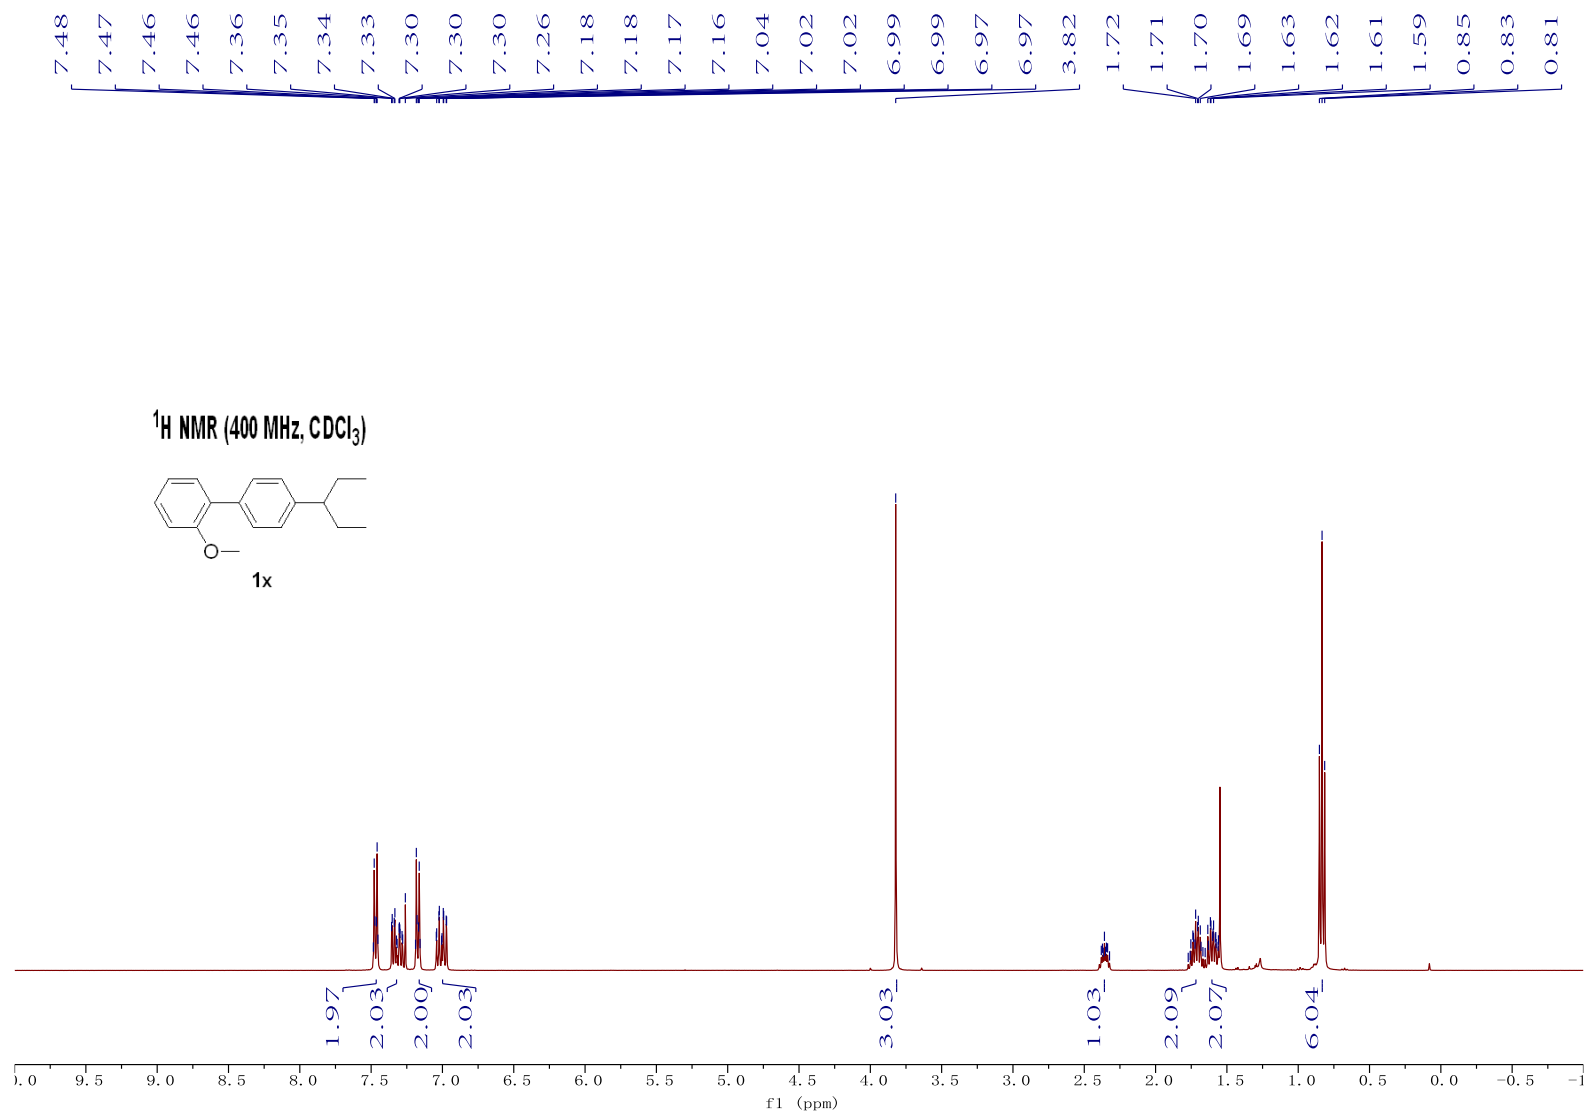

<sup>13</sup>C NMR (101 MHz, CDCl<sub>3</sub>)

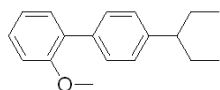

1x

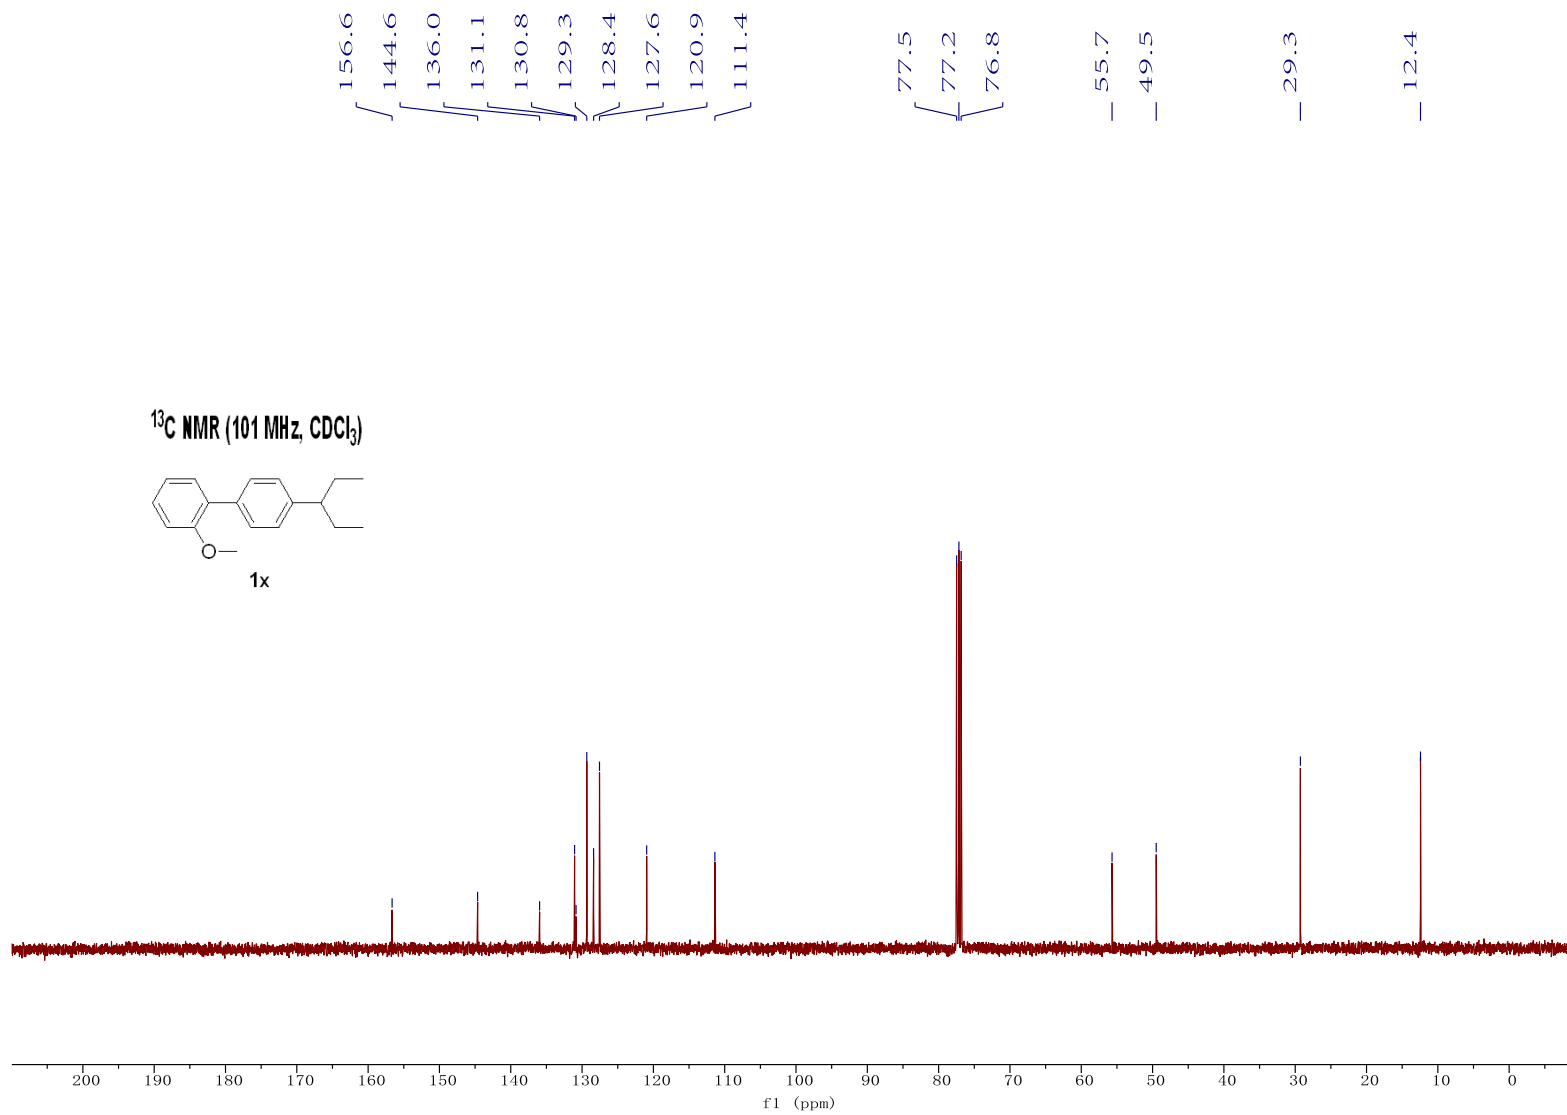

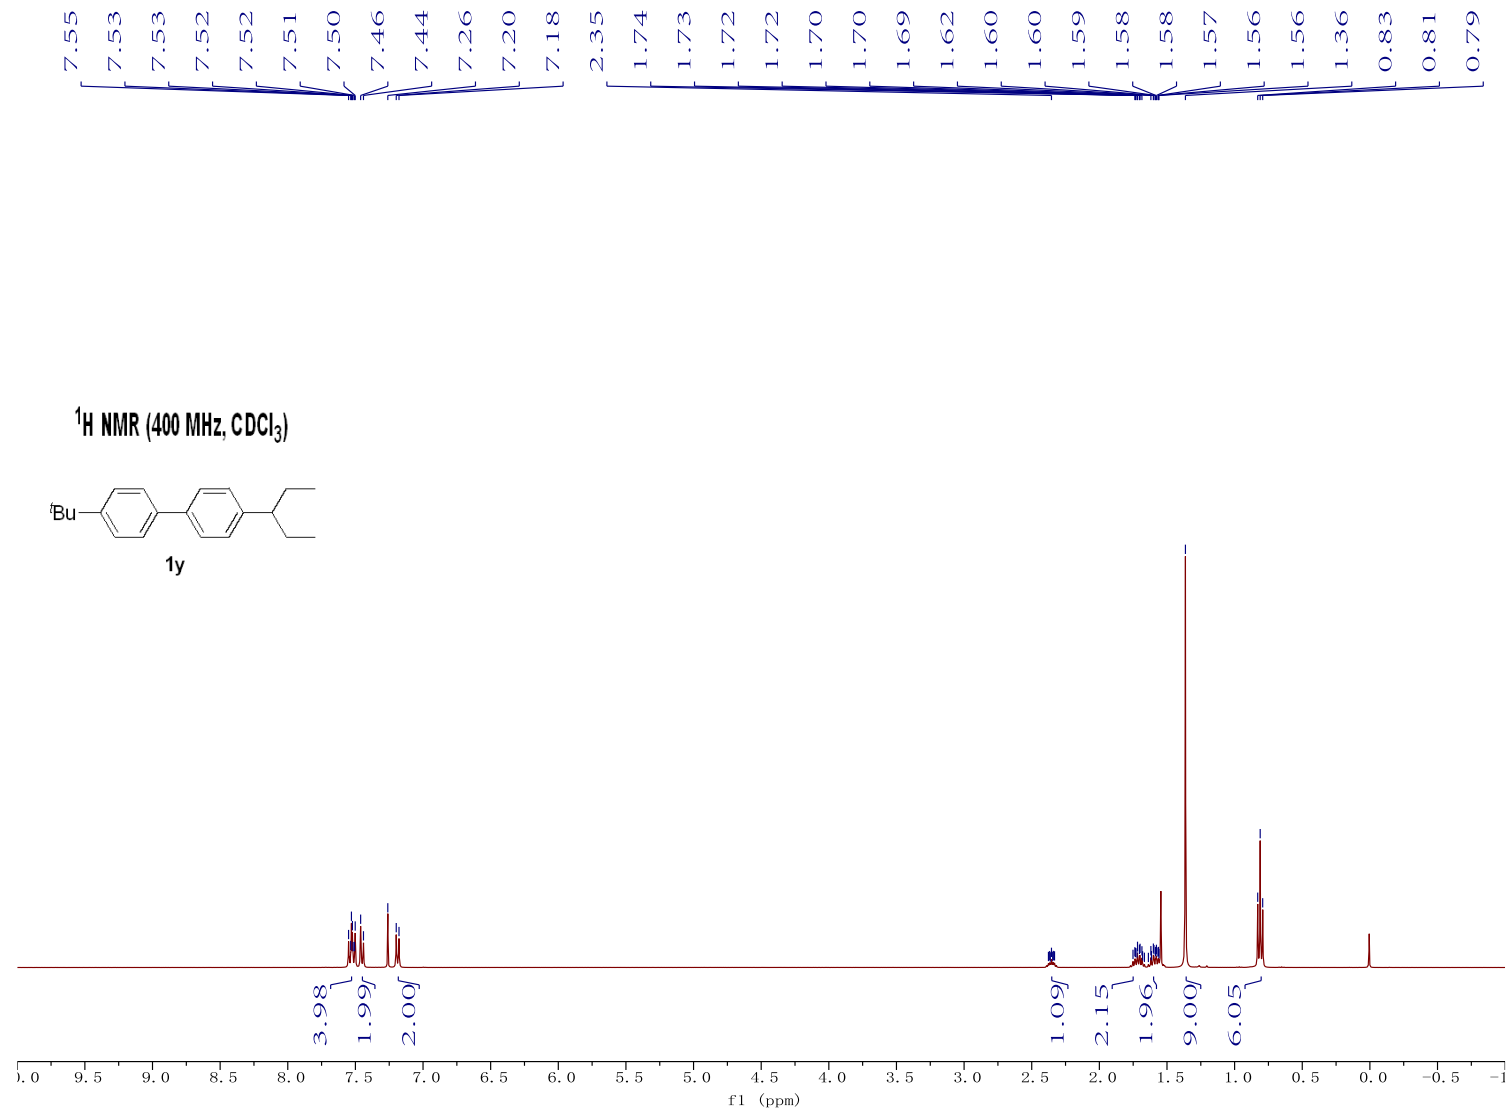



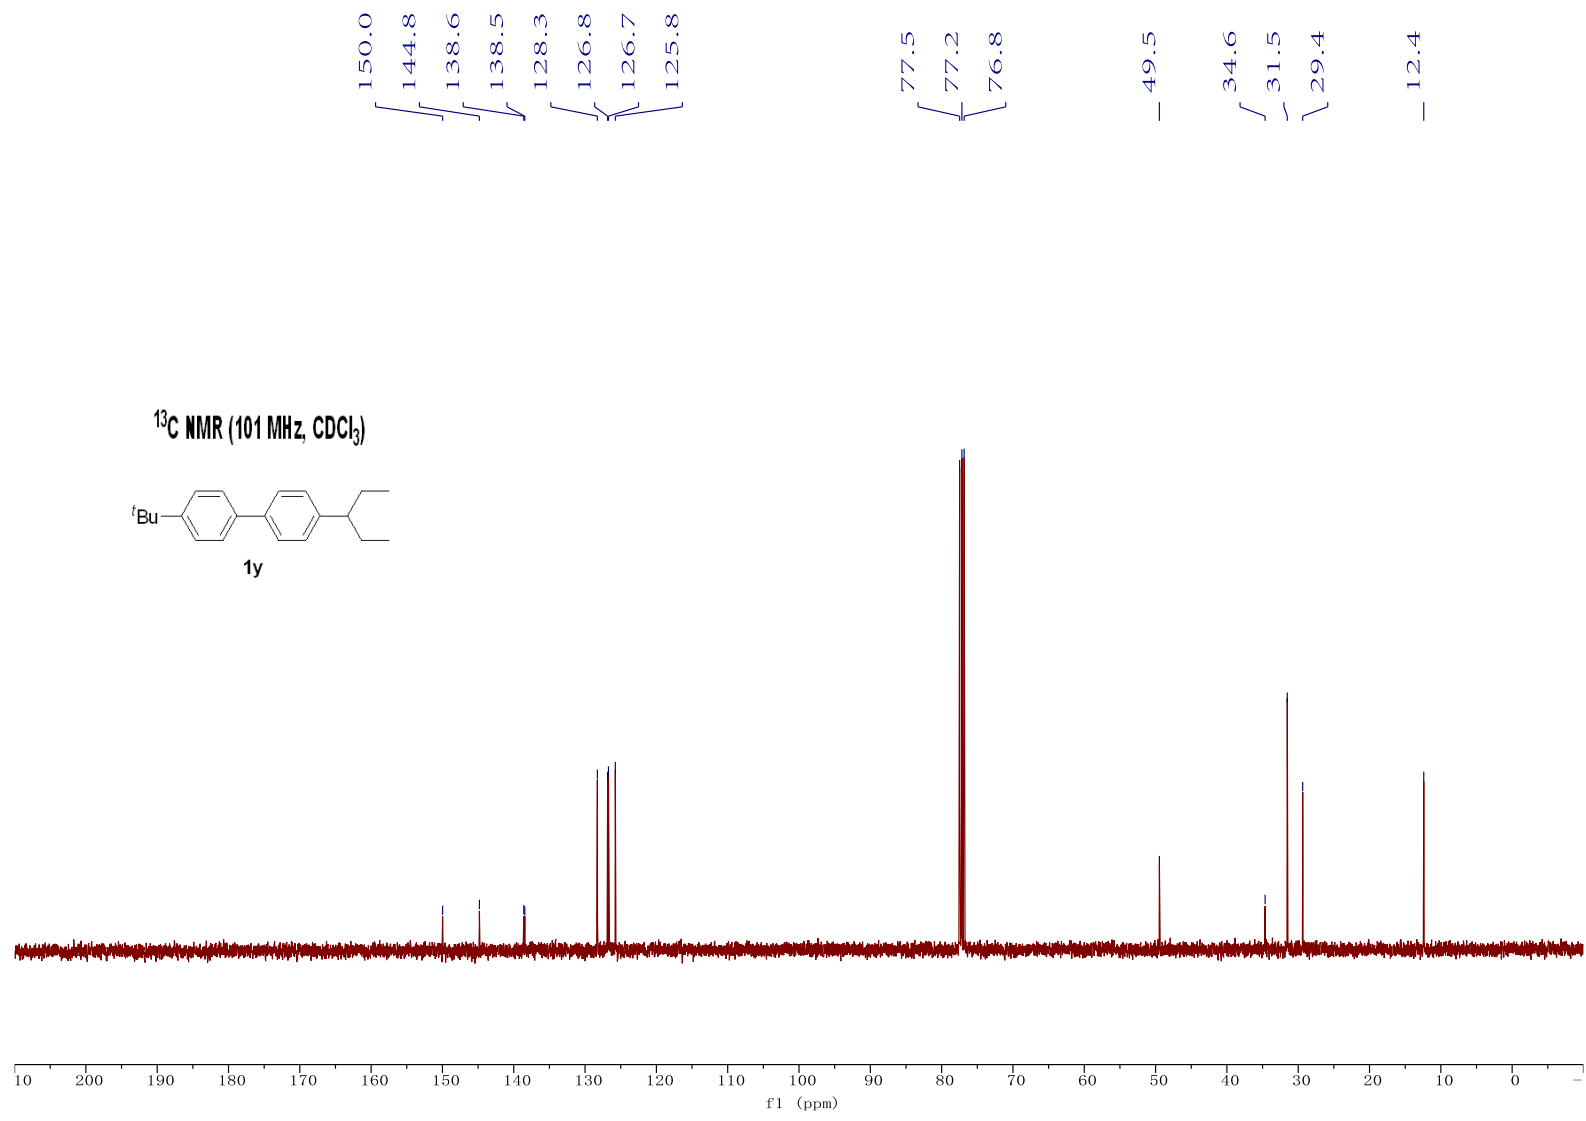

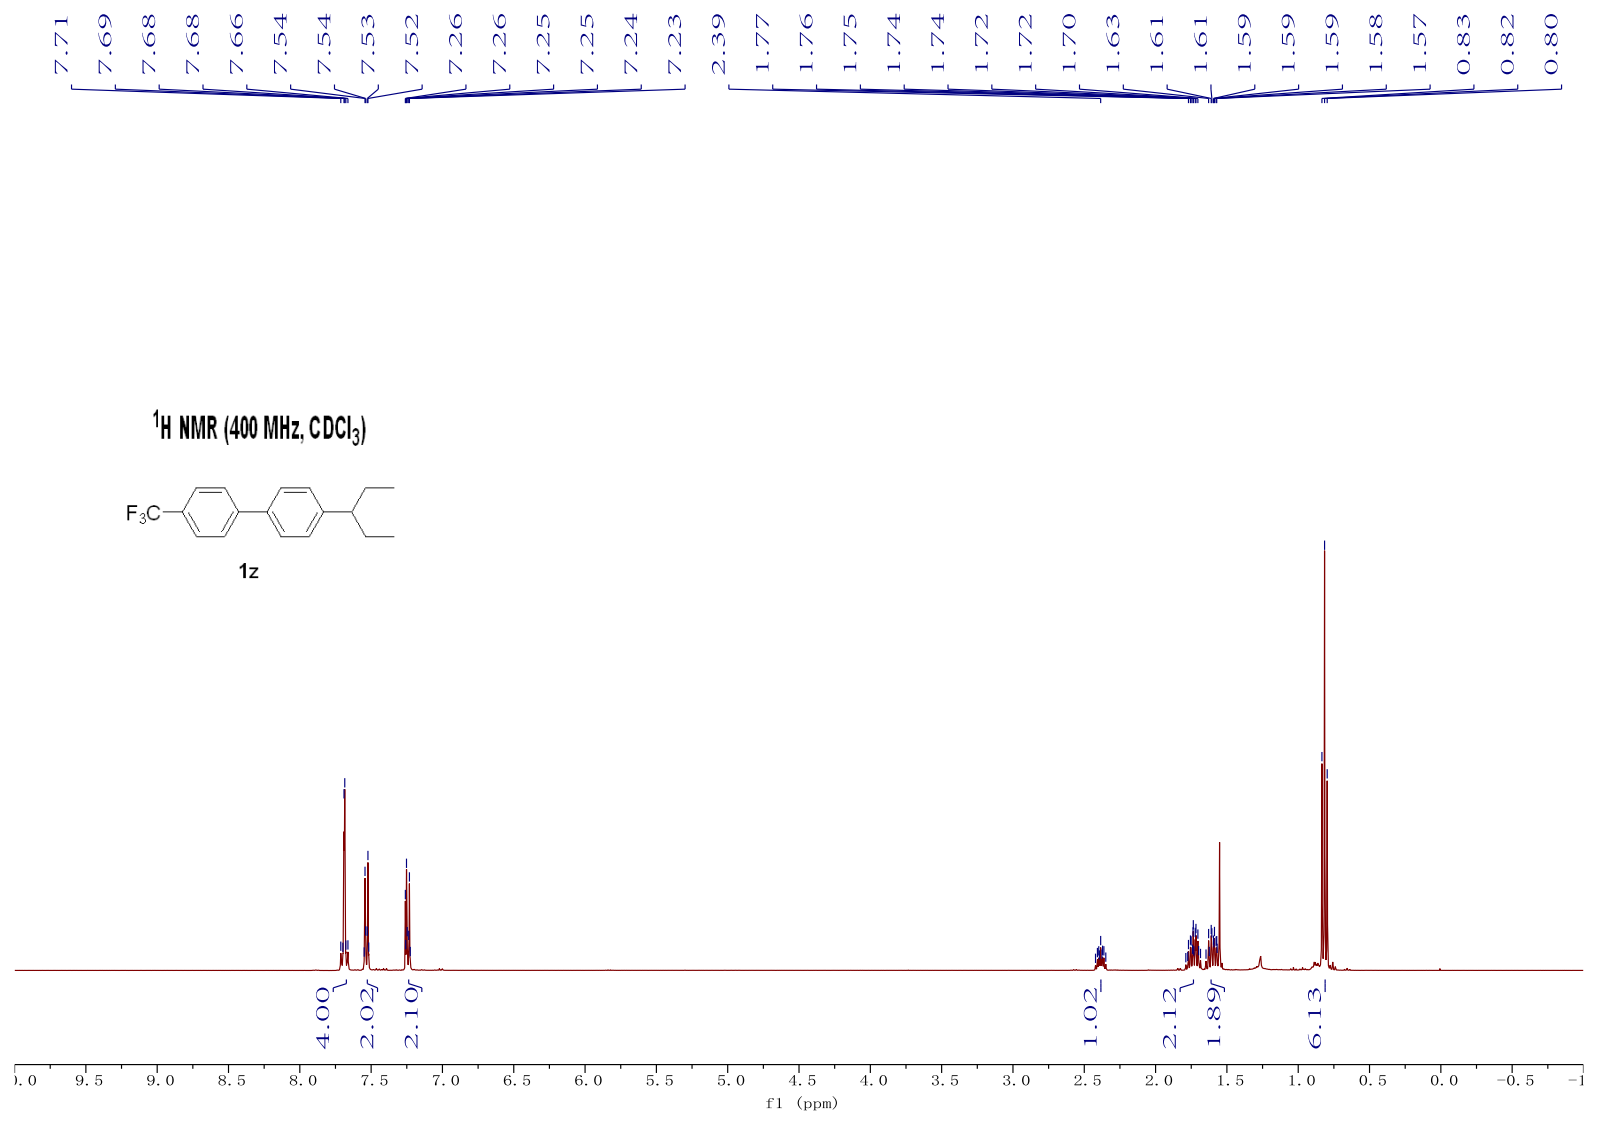

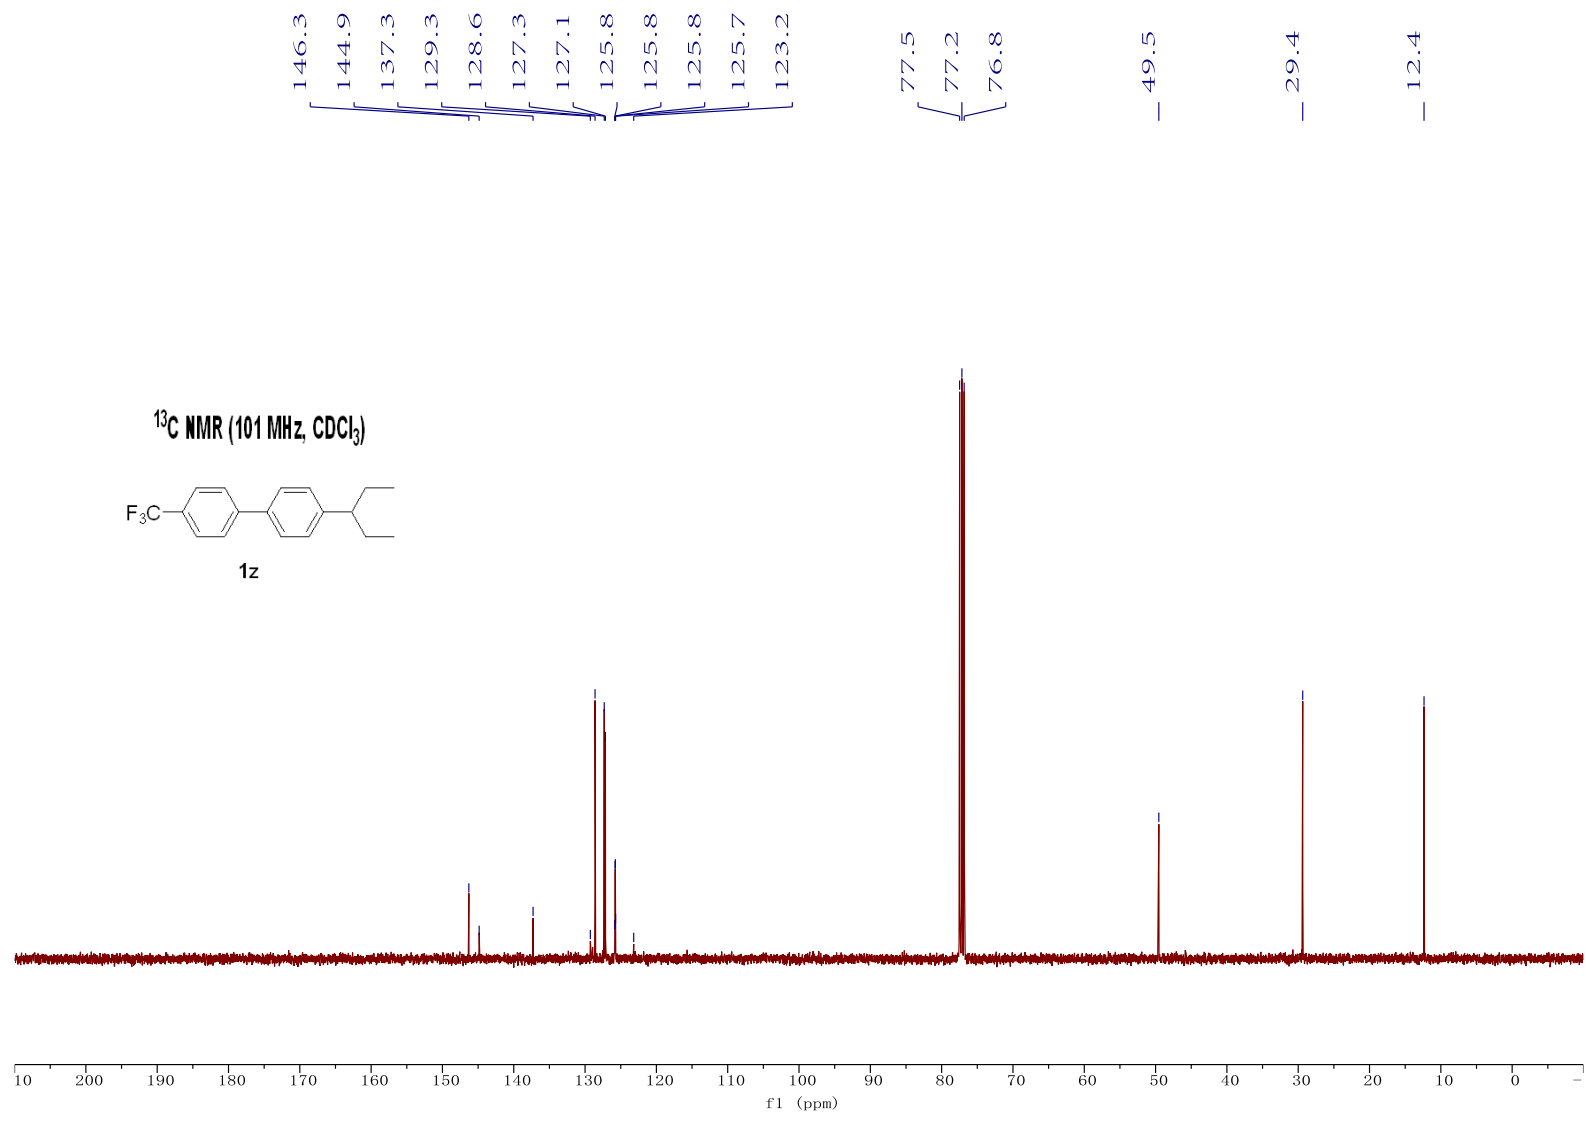

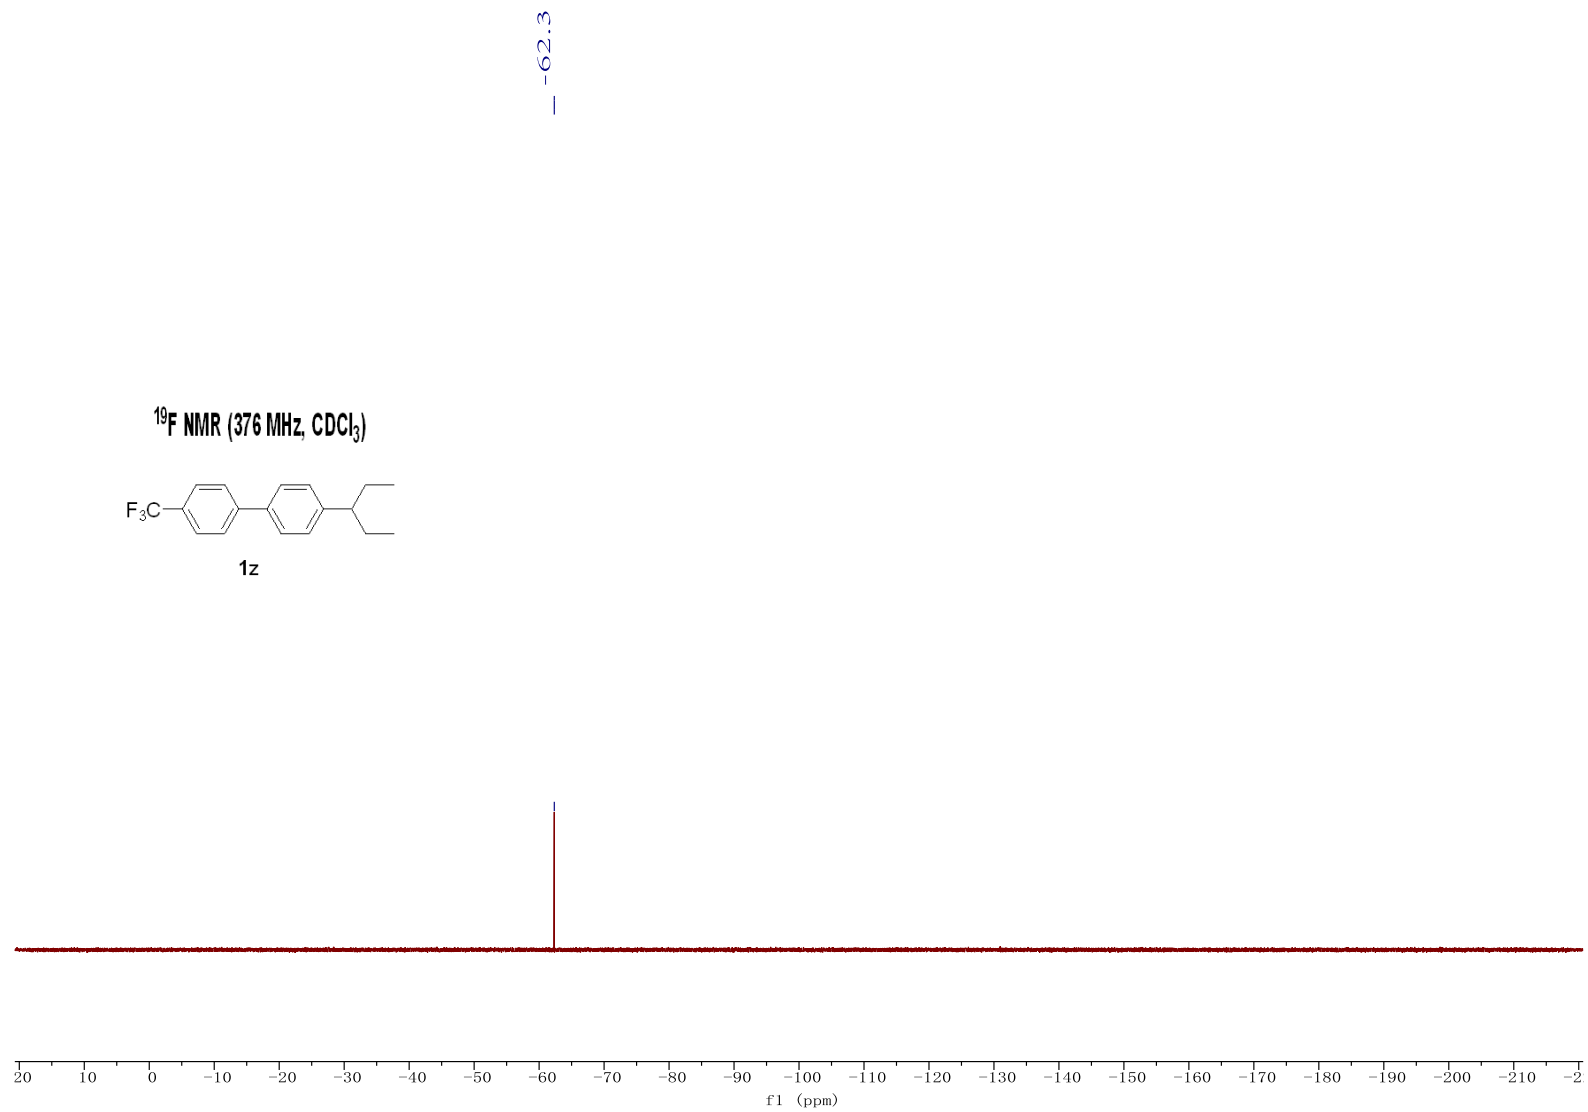

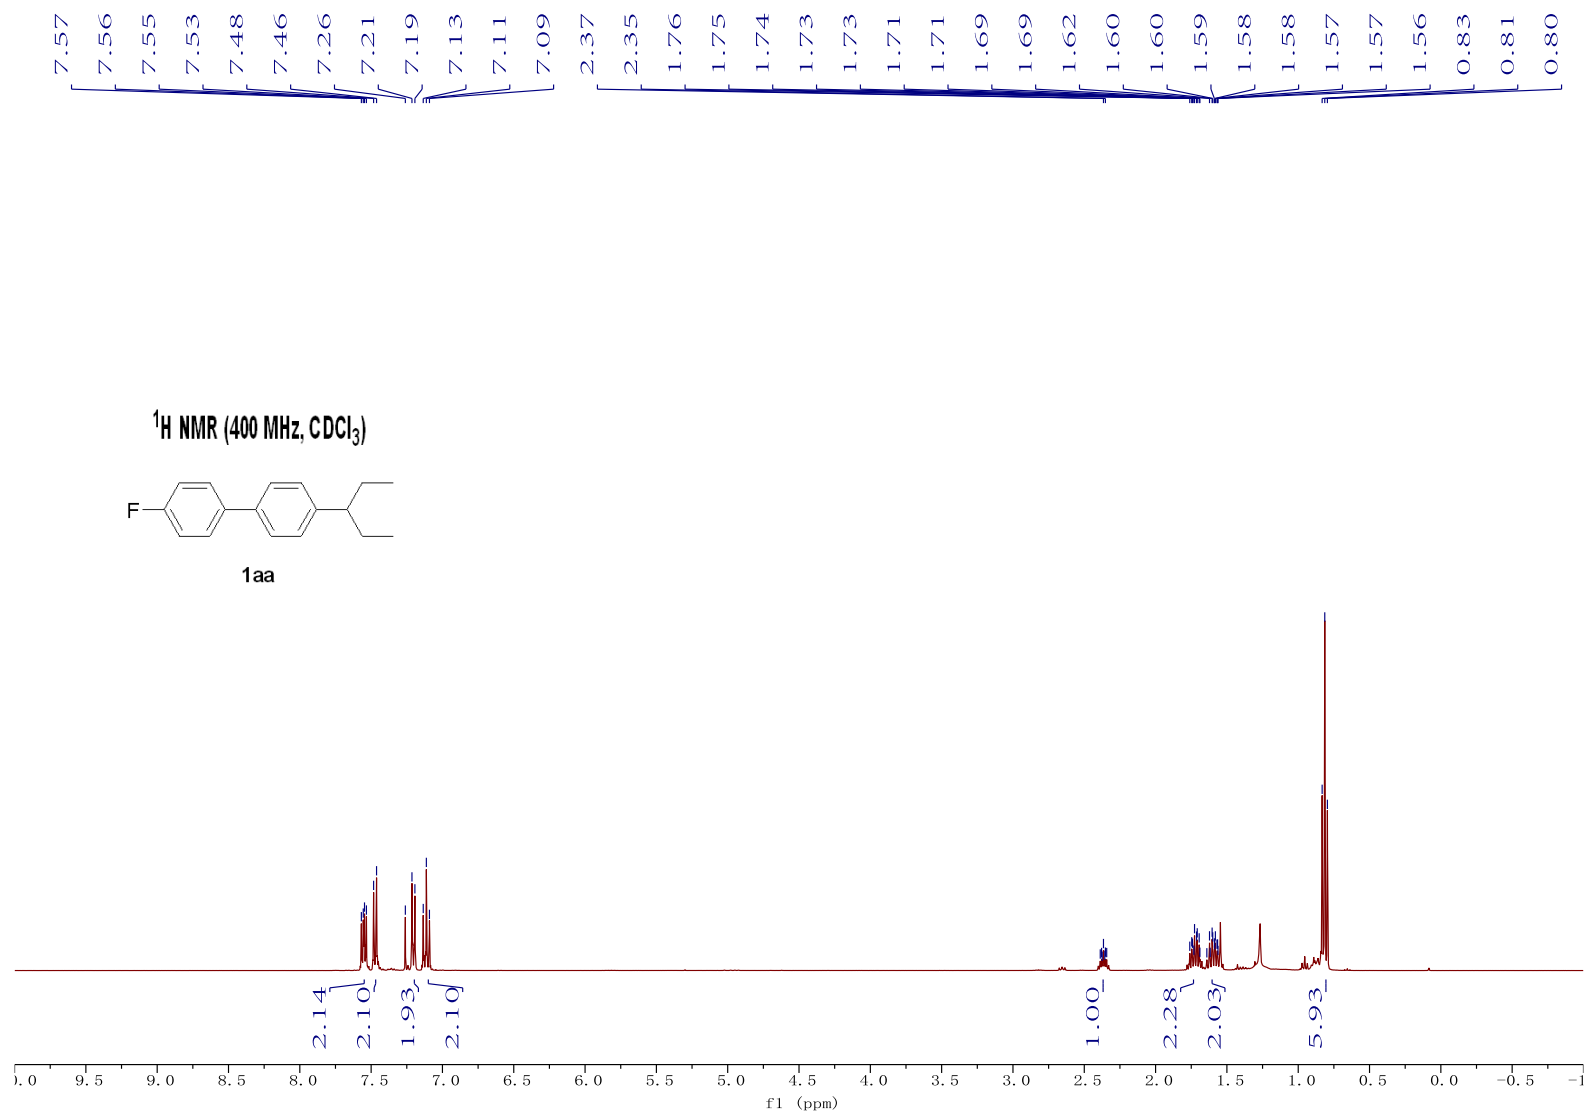

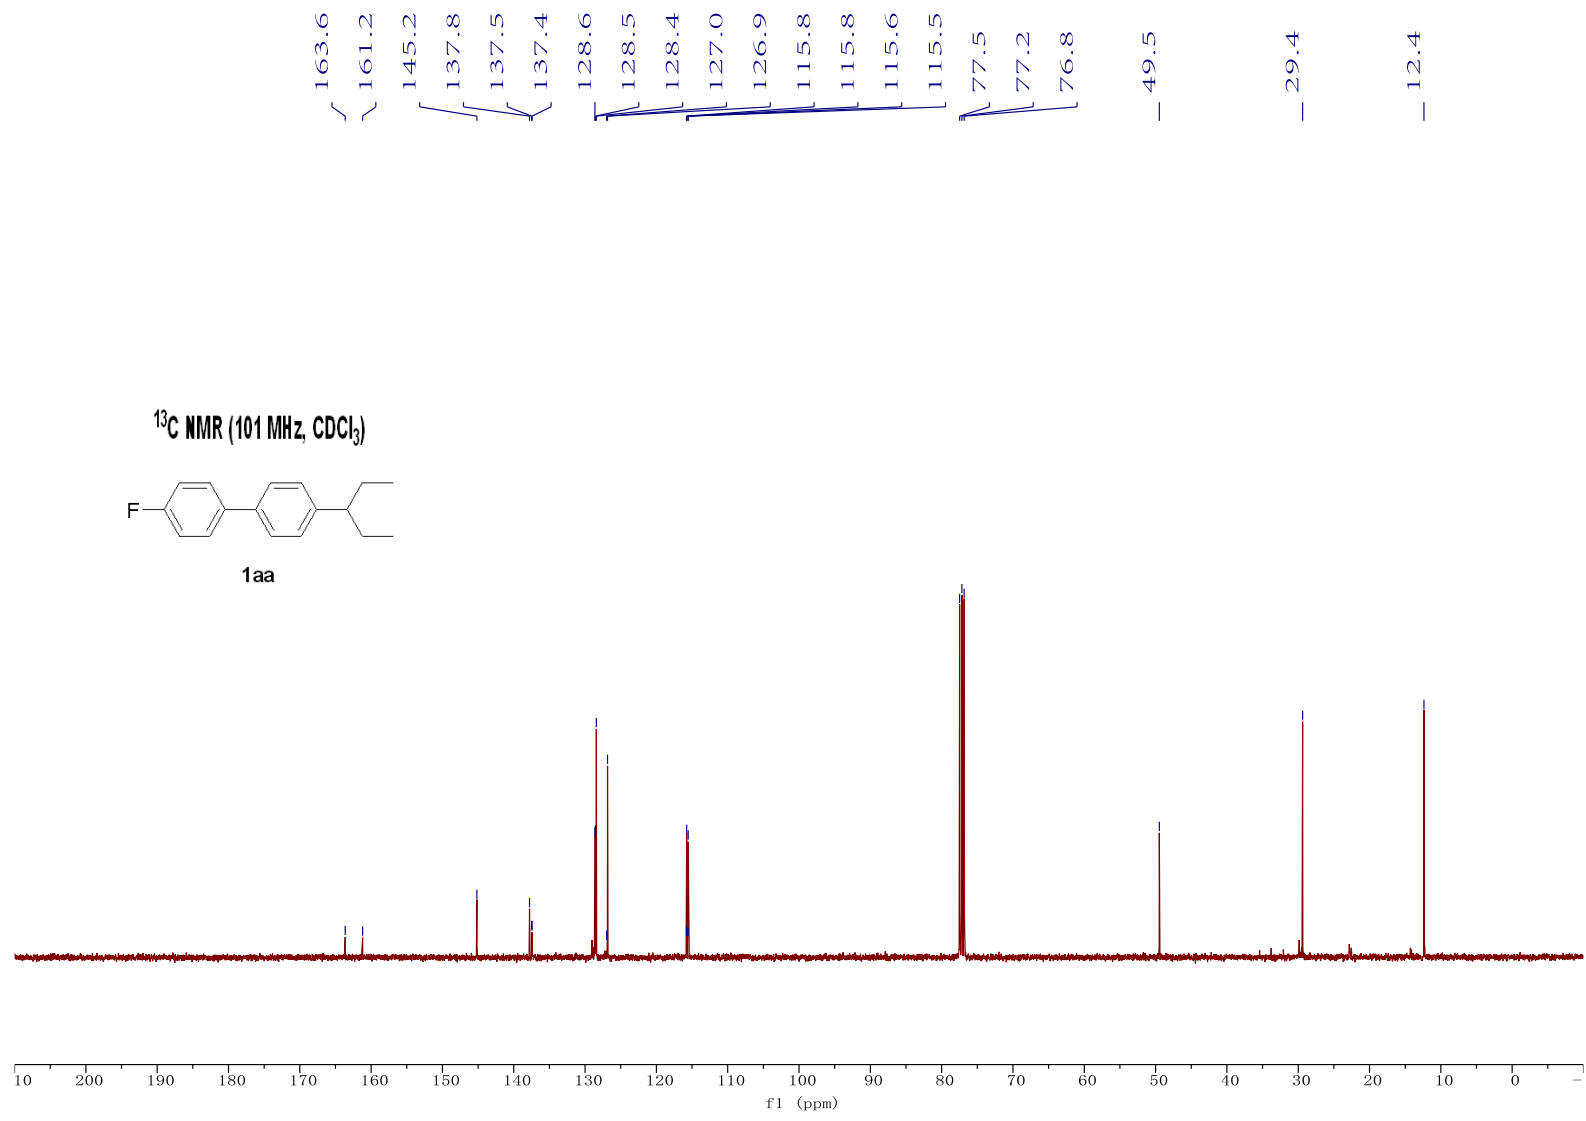

<sup>19</sup>F NMR (376 MHz, CDCl<sub>3</sub>)

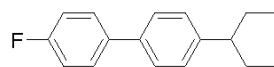

1aa

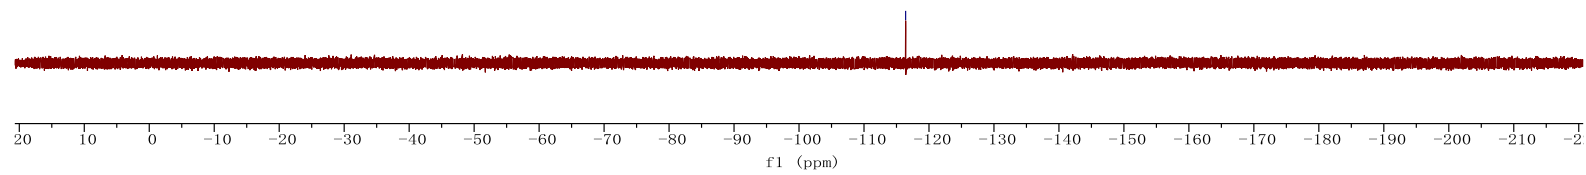

-116.4

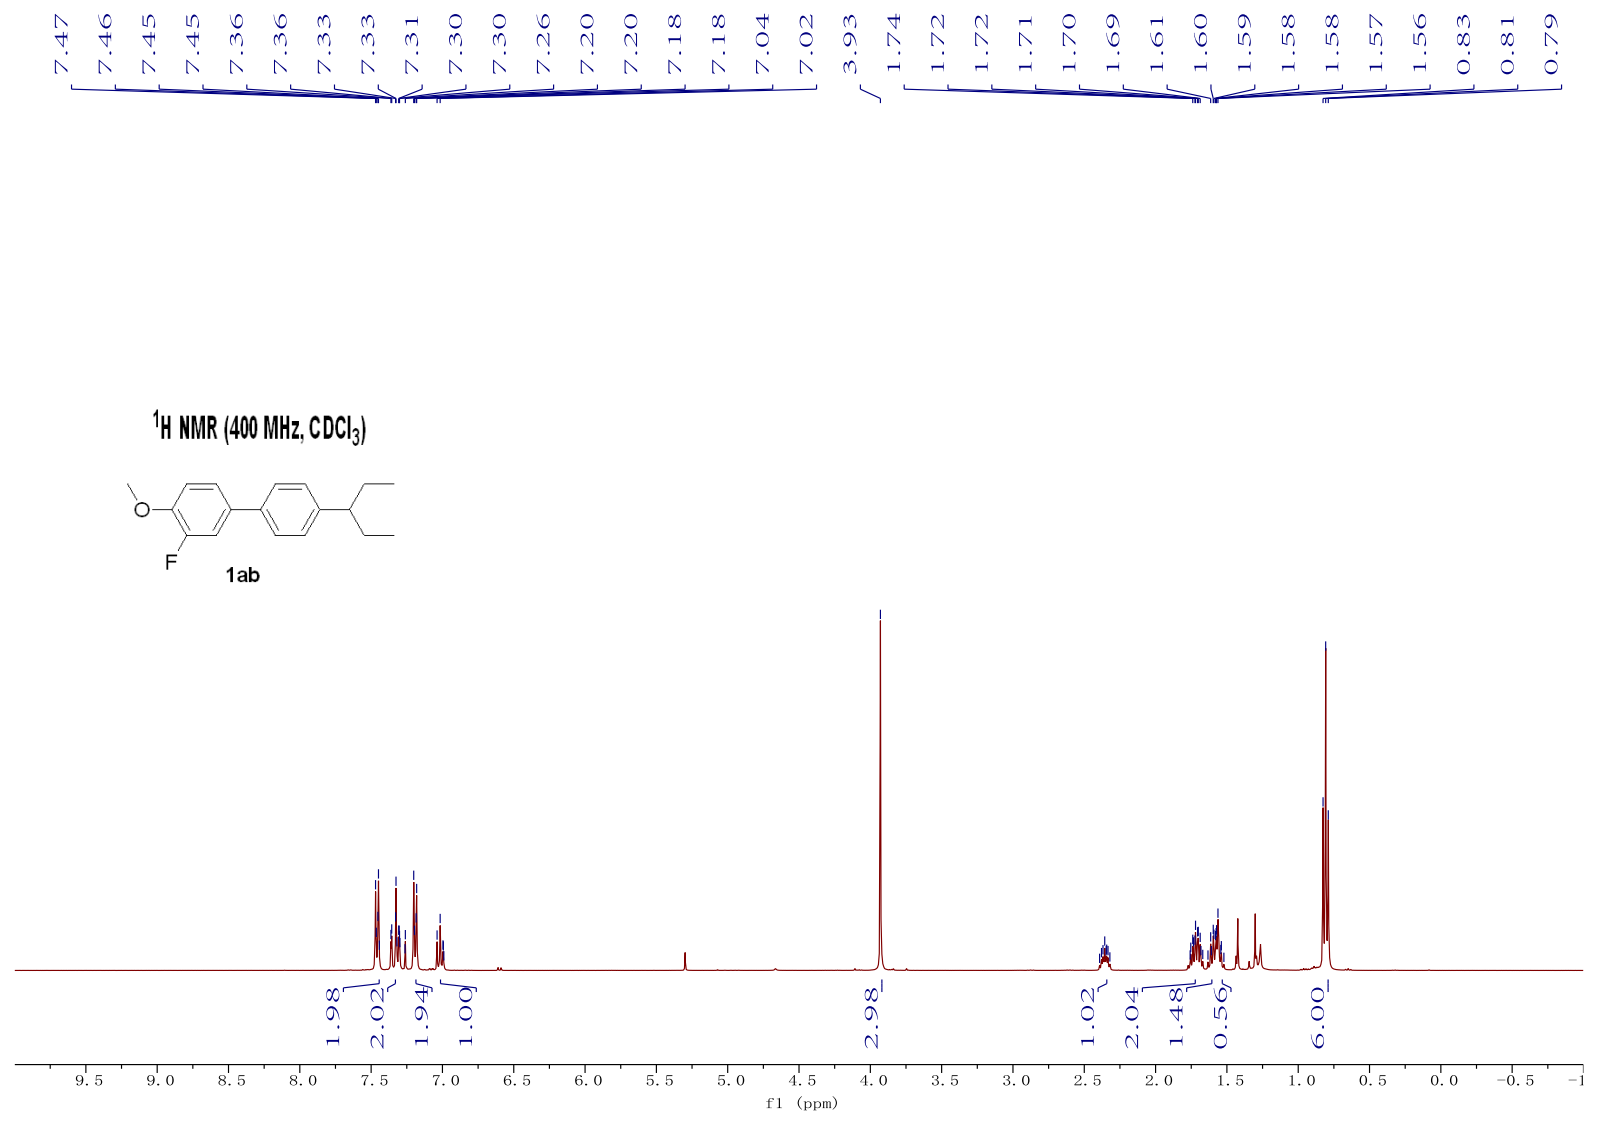



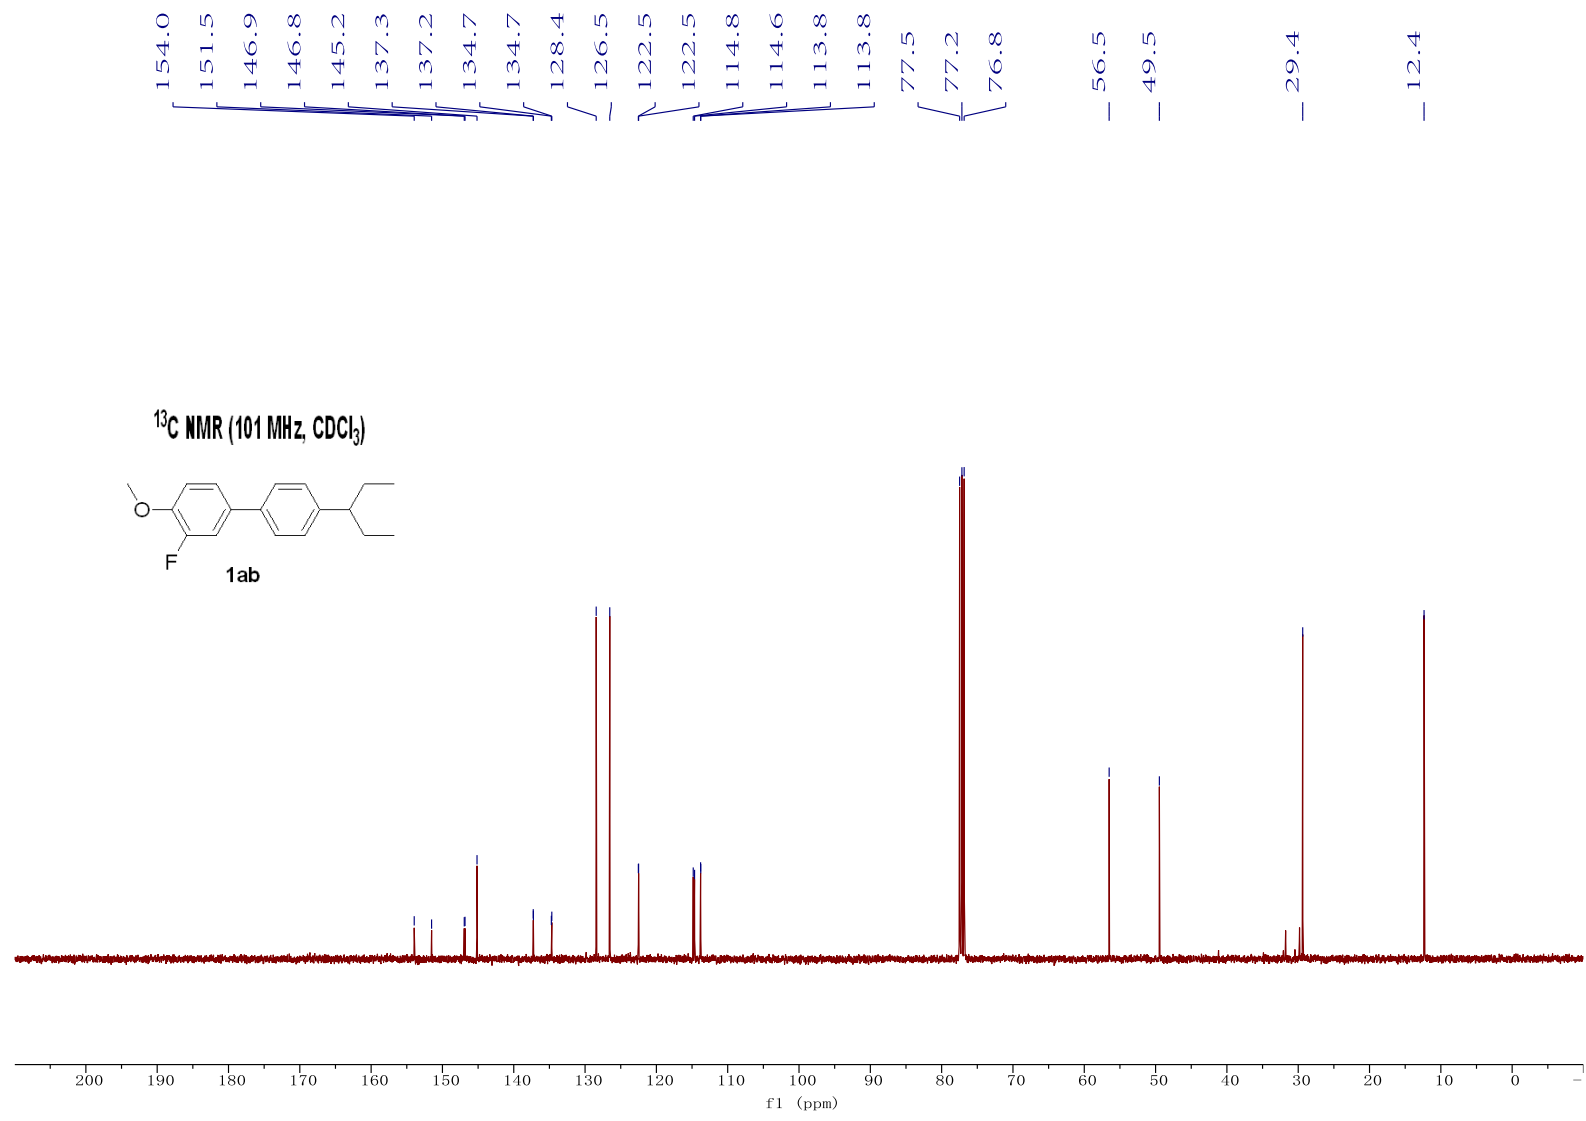

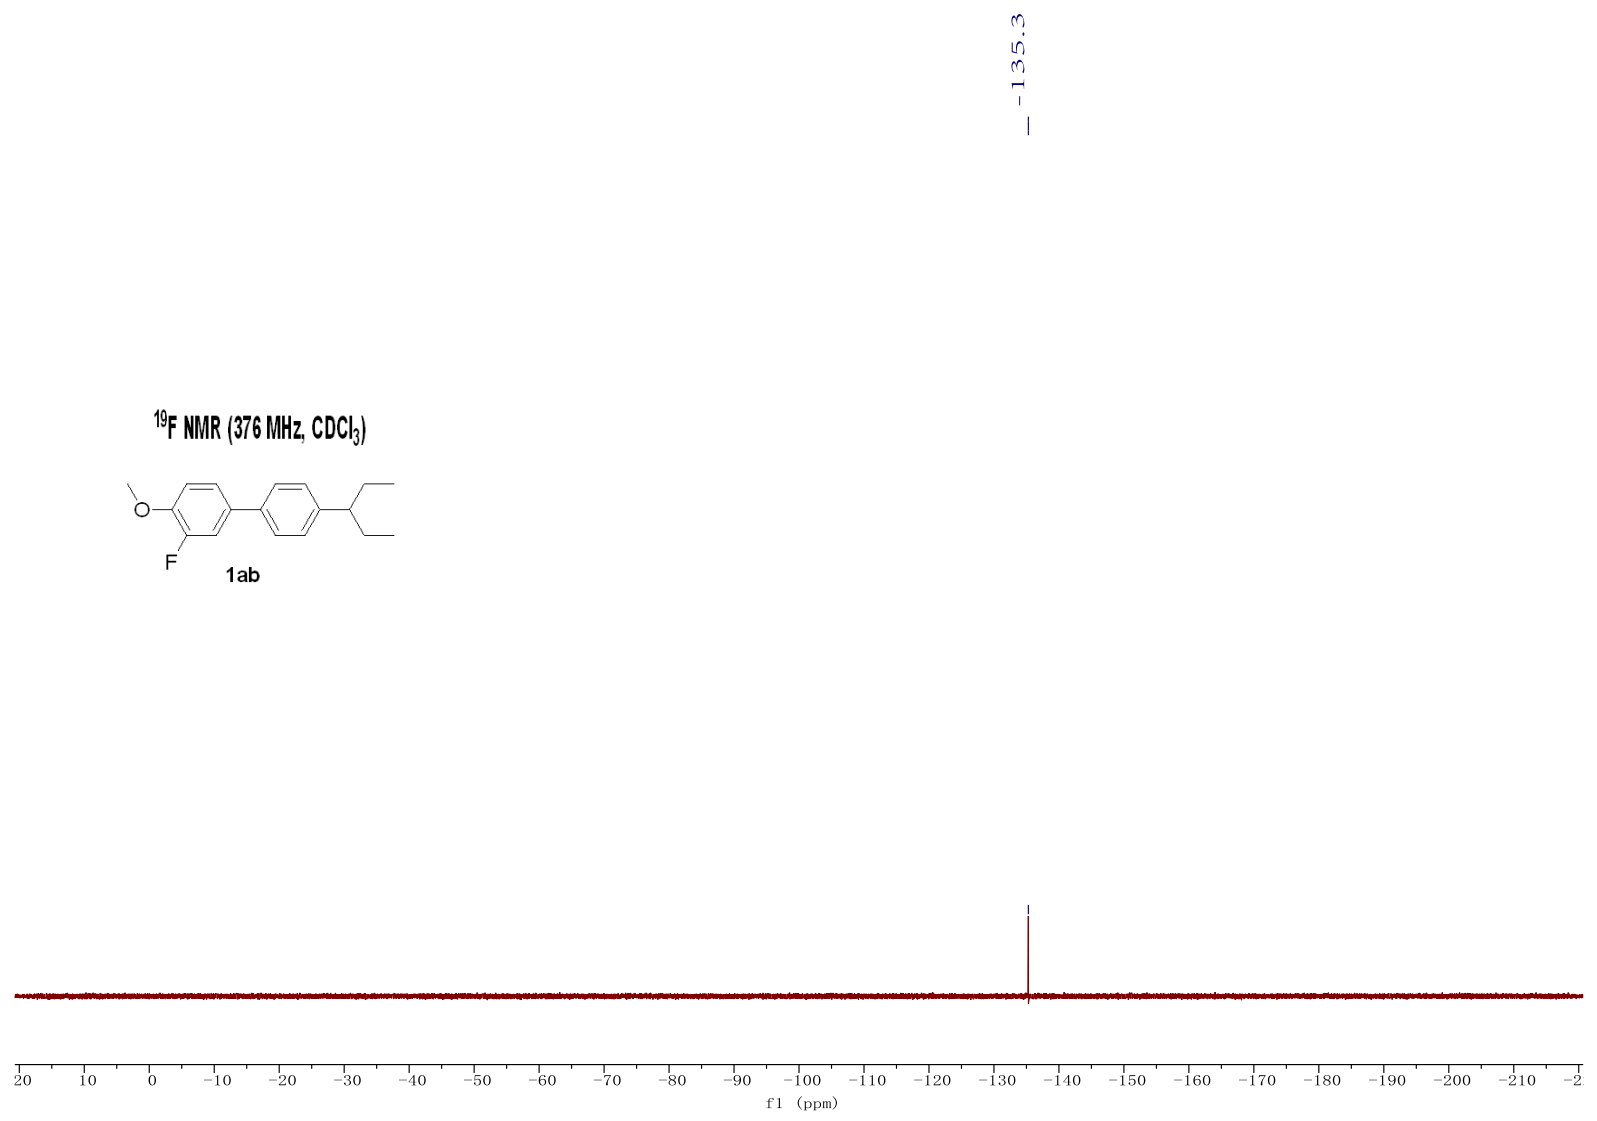

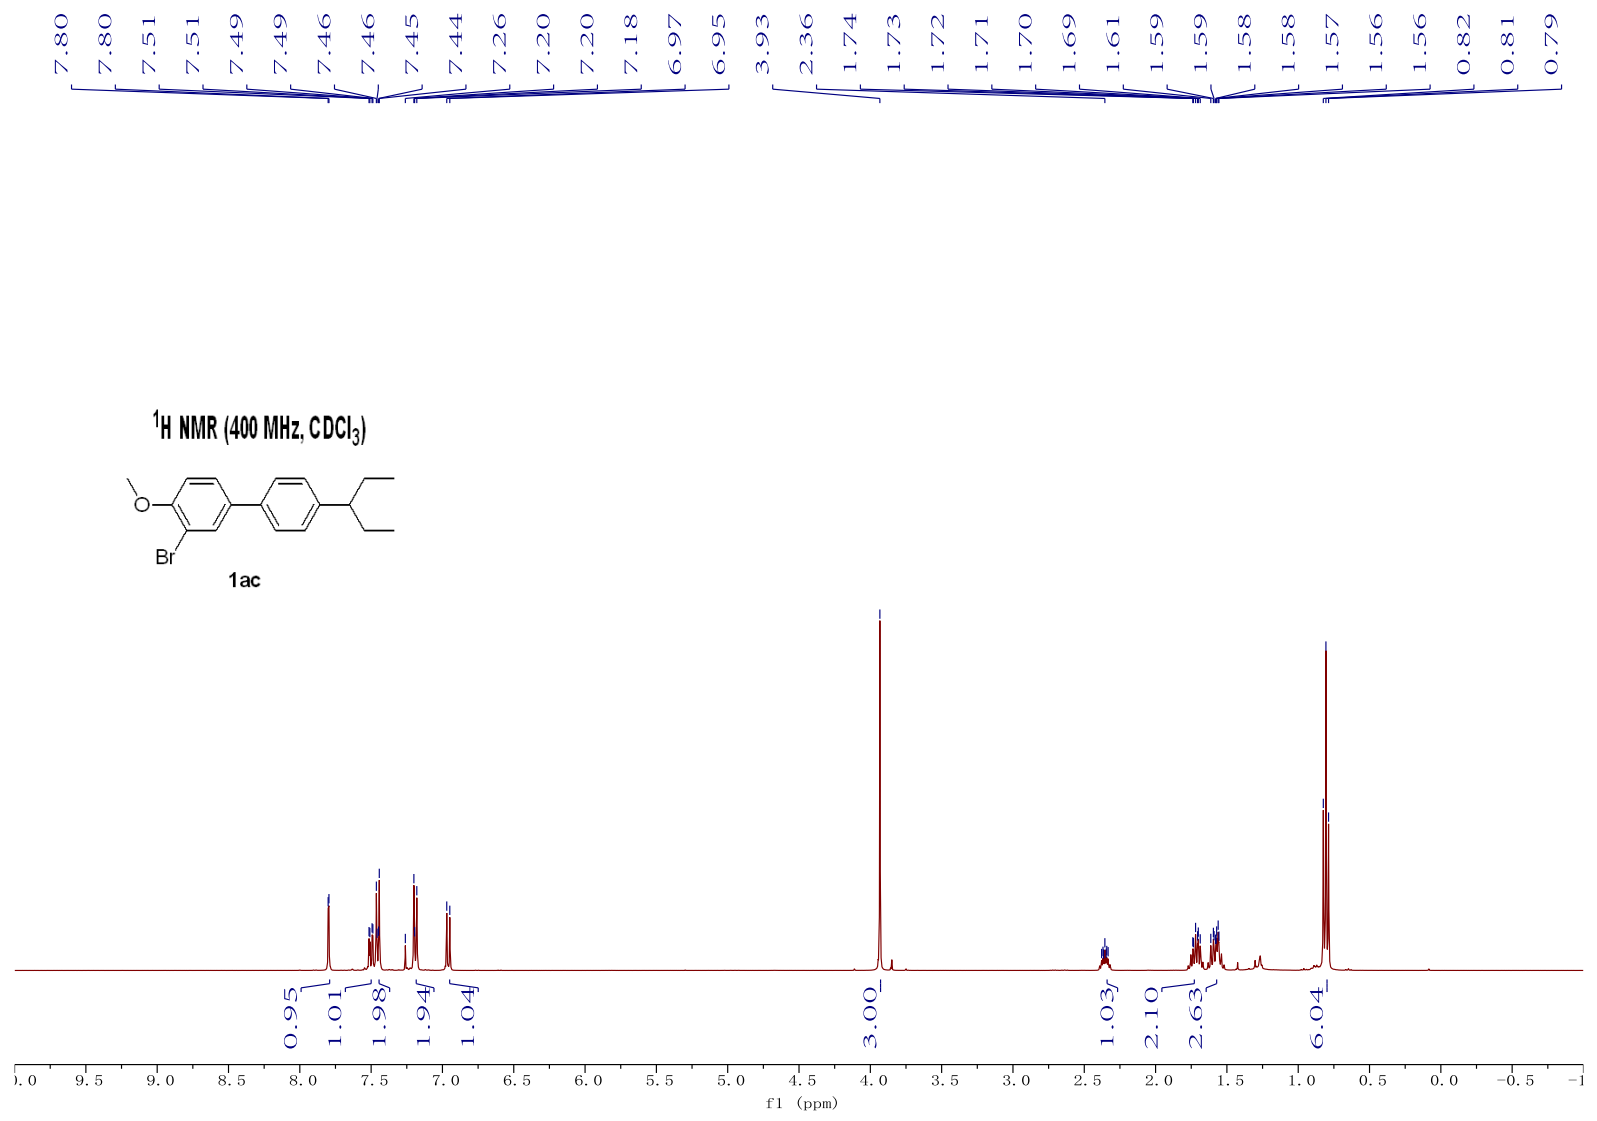

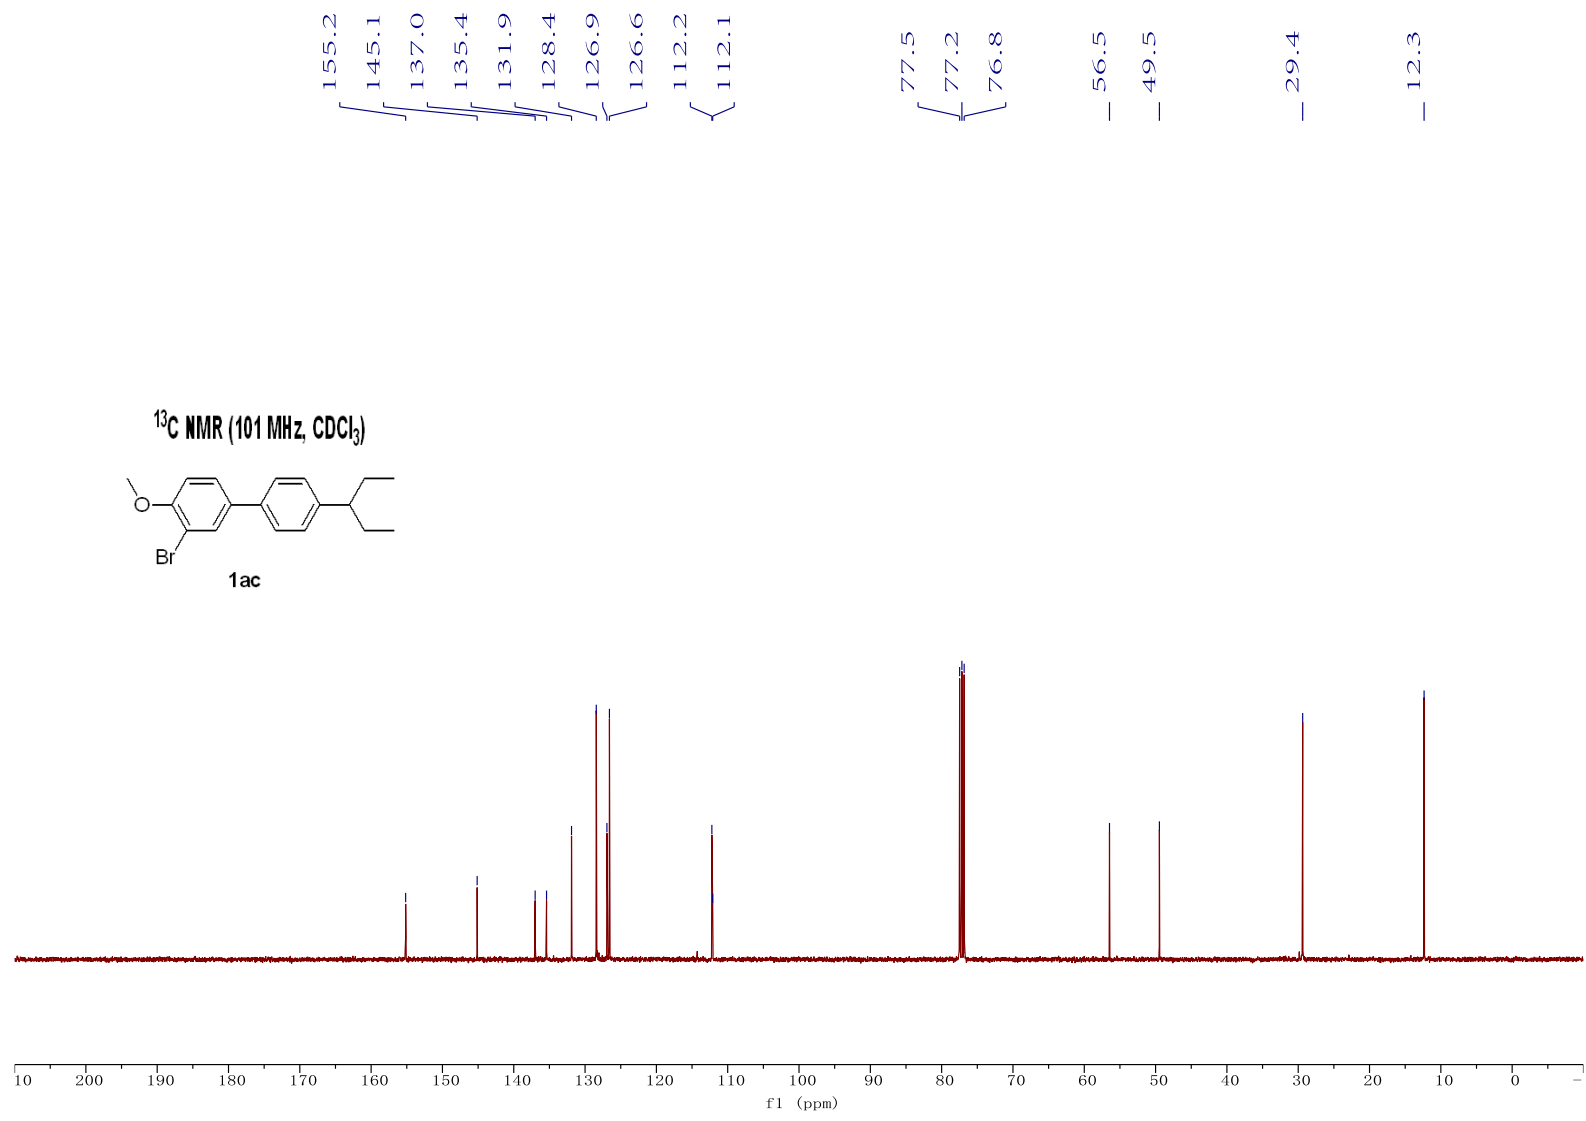

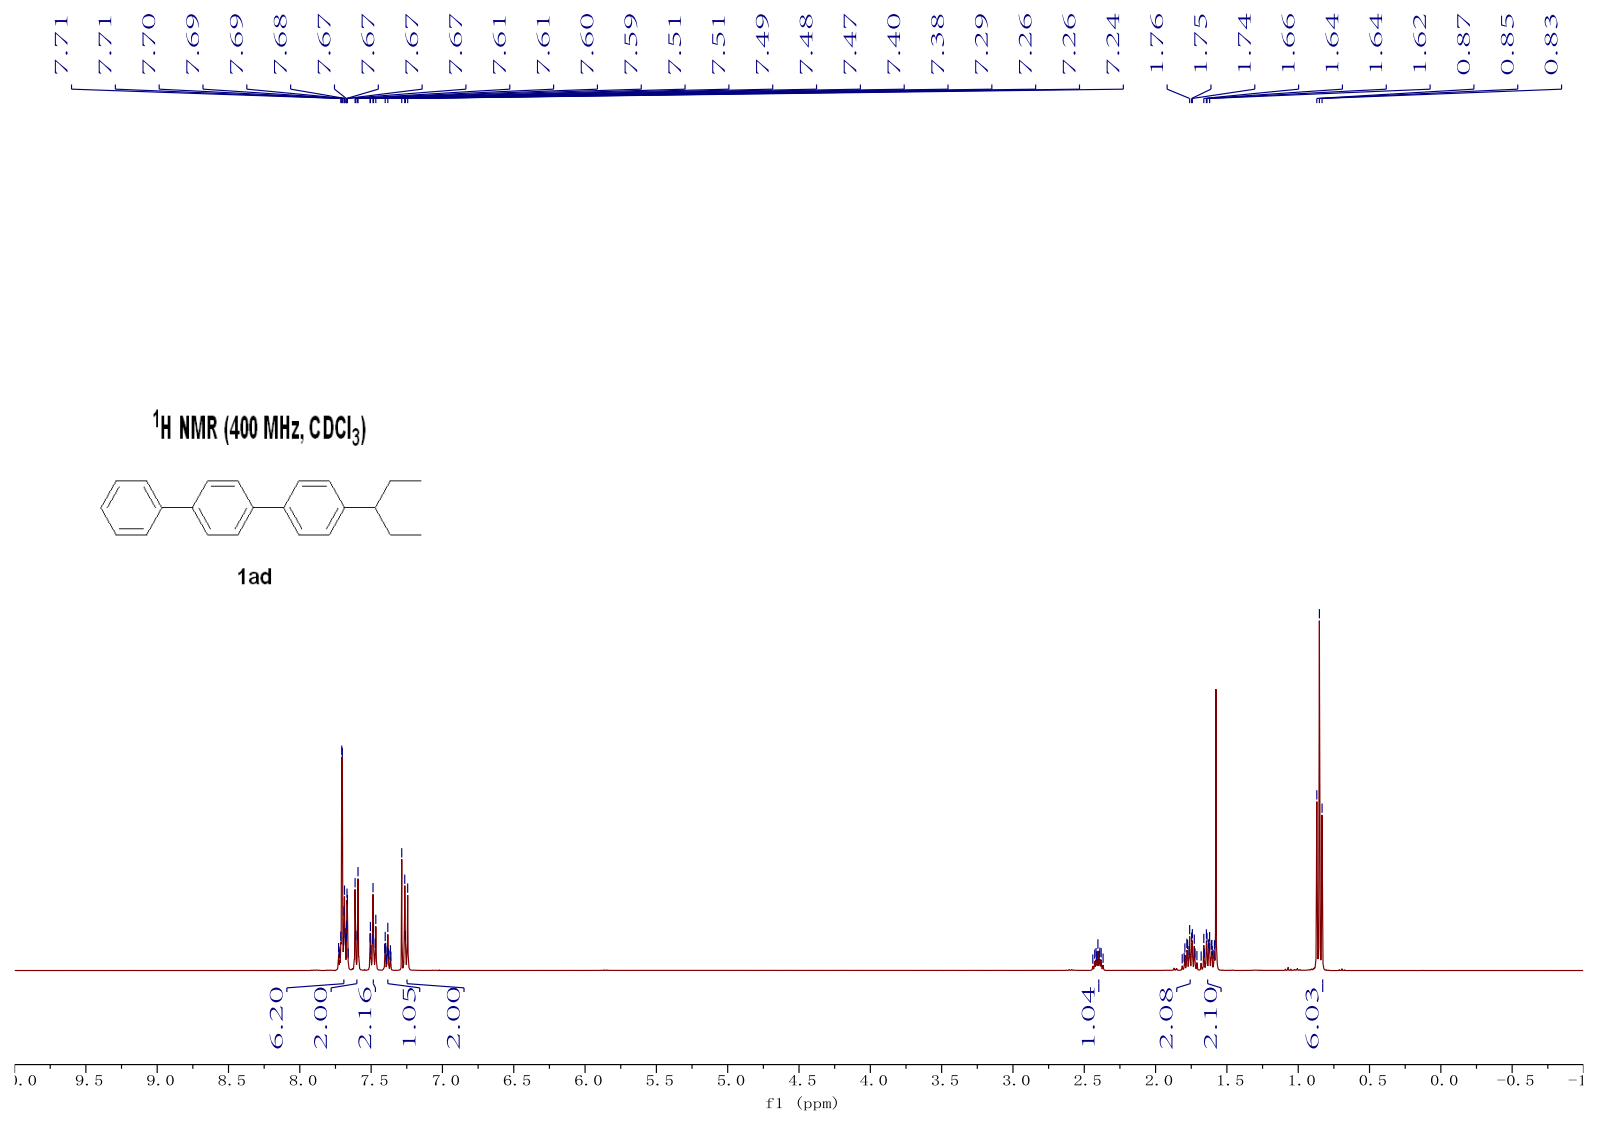

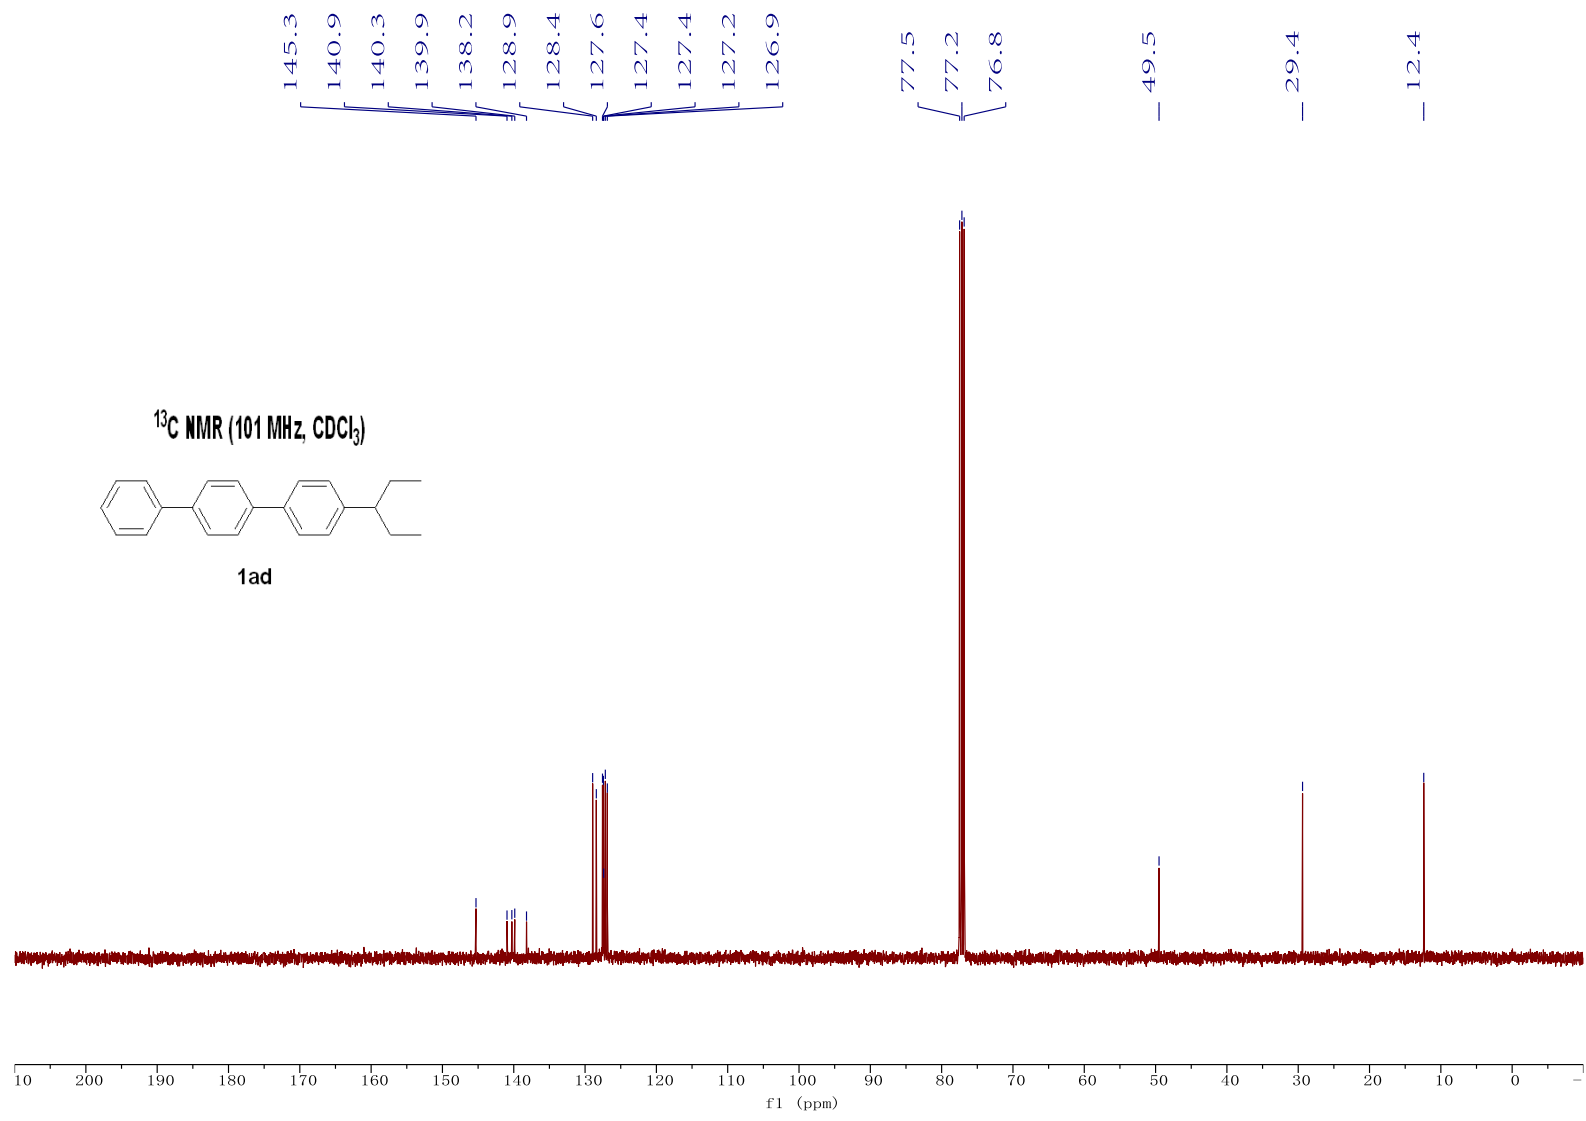

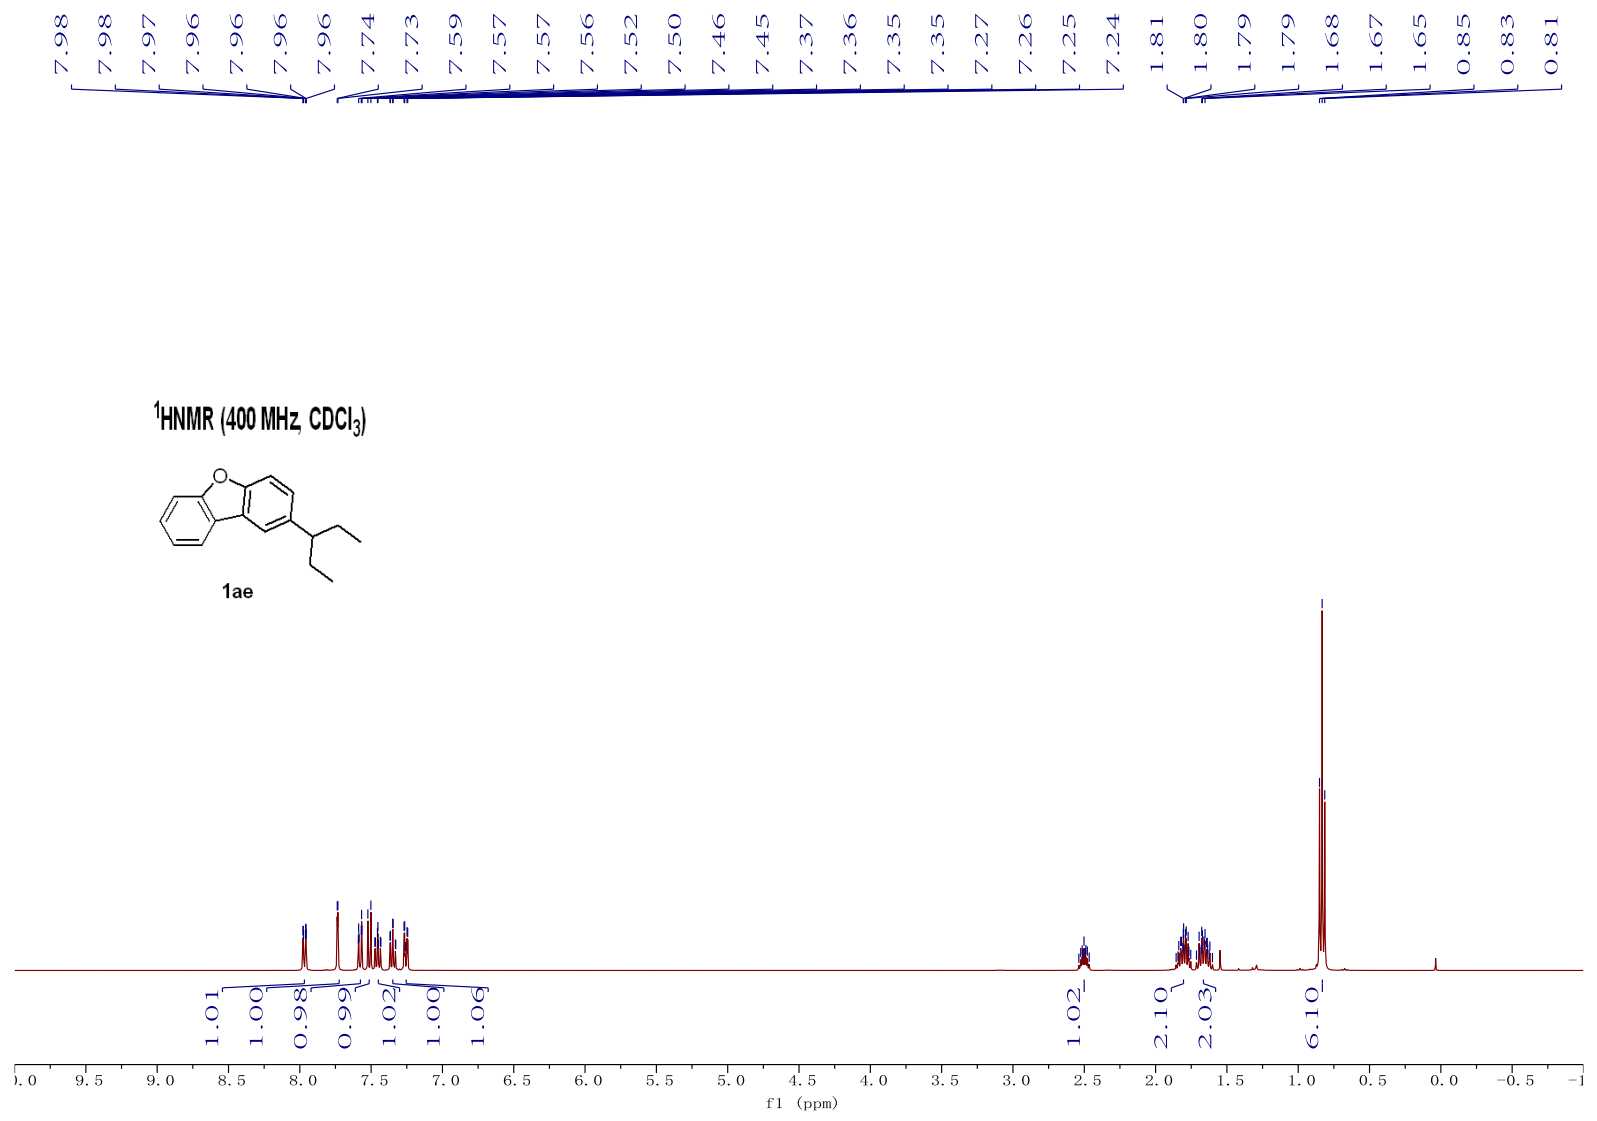

<sup>13</sup>CNMR (101 MHz, CDCl<sub>3</sub>)

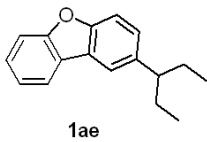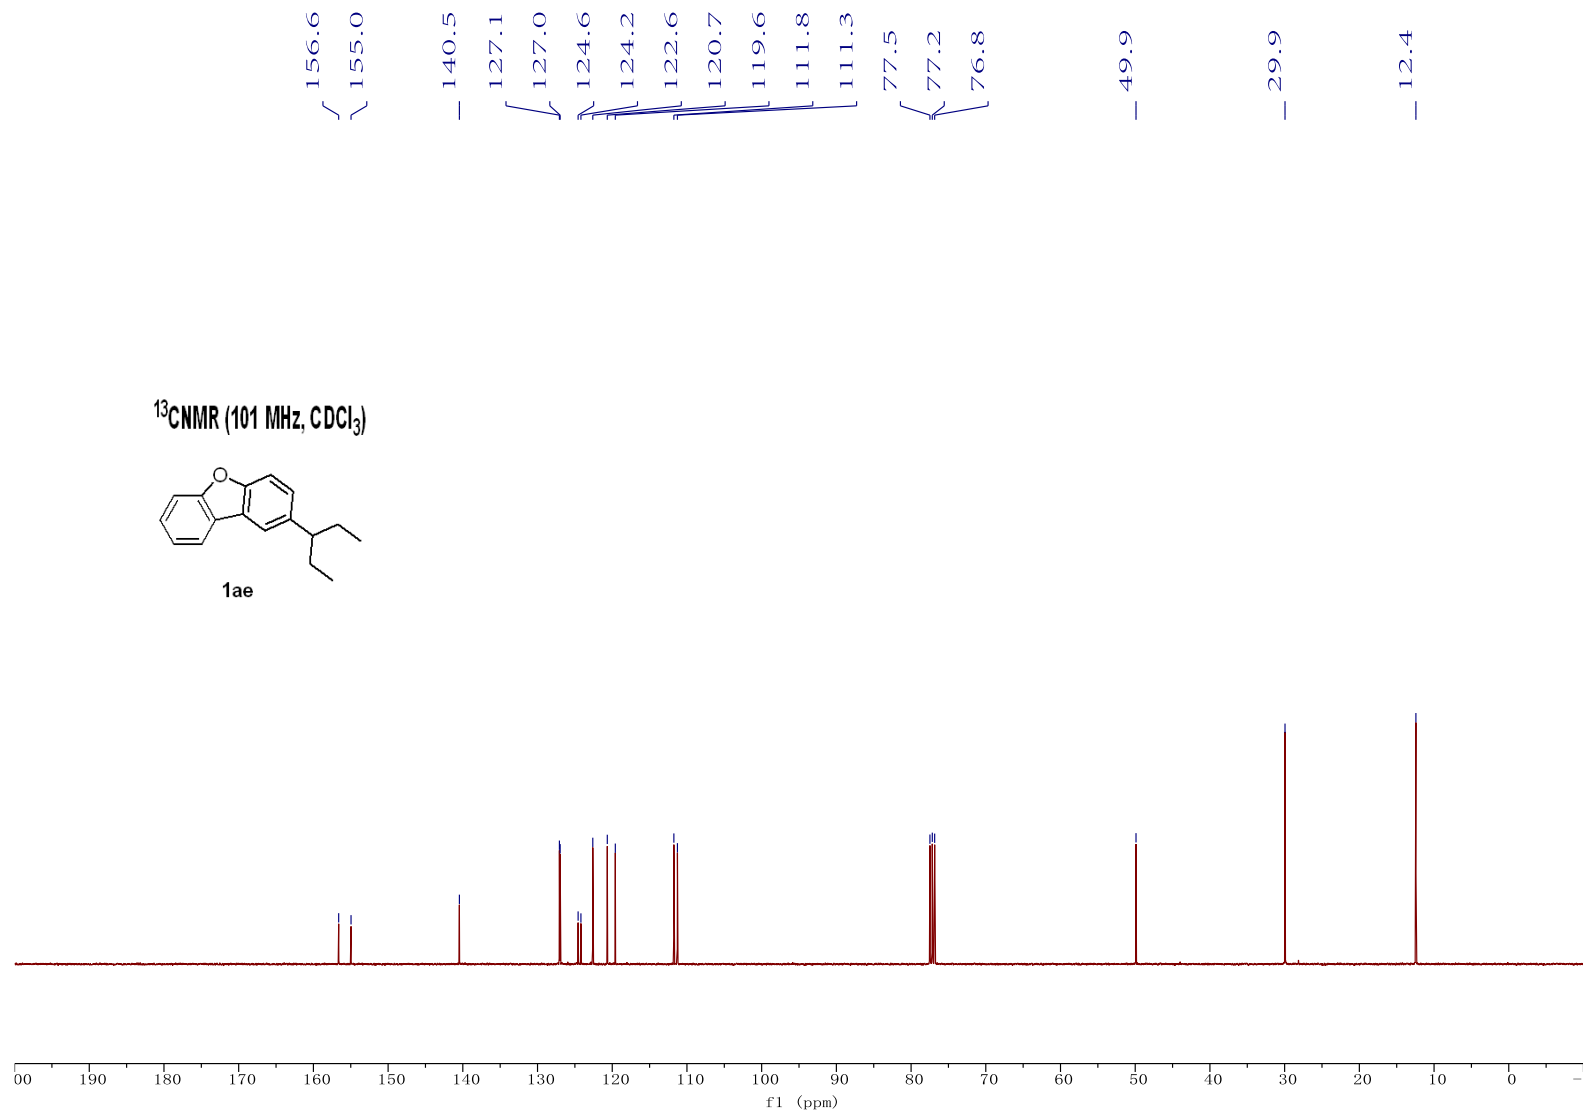



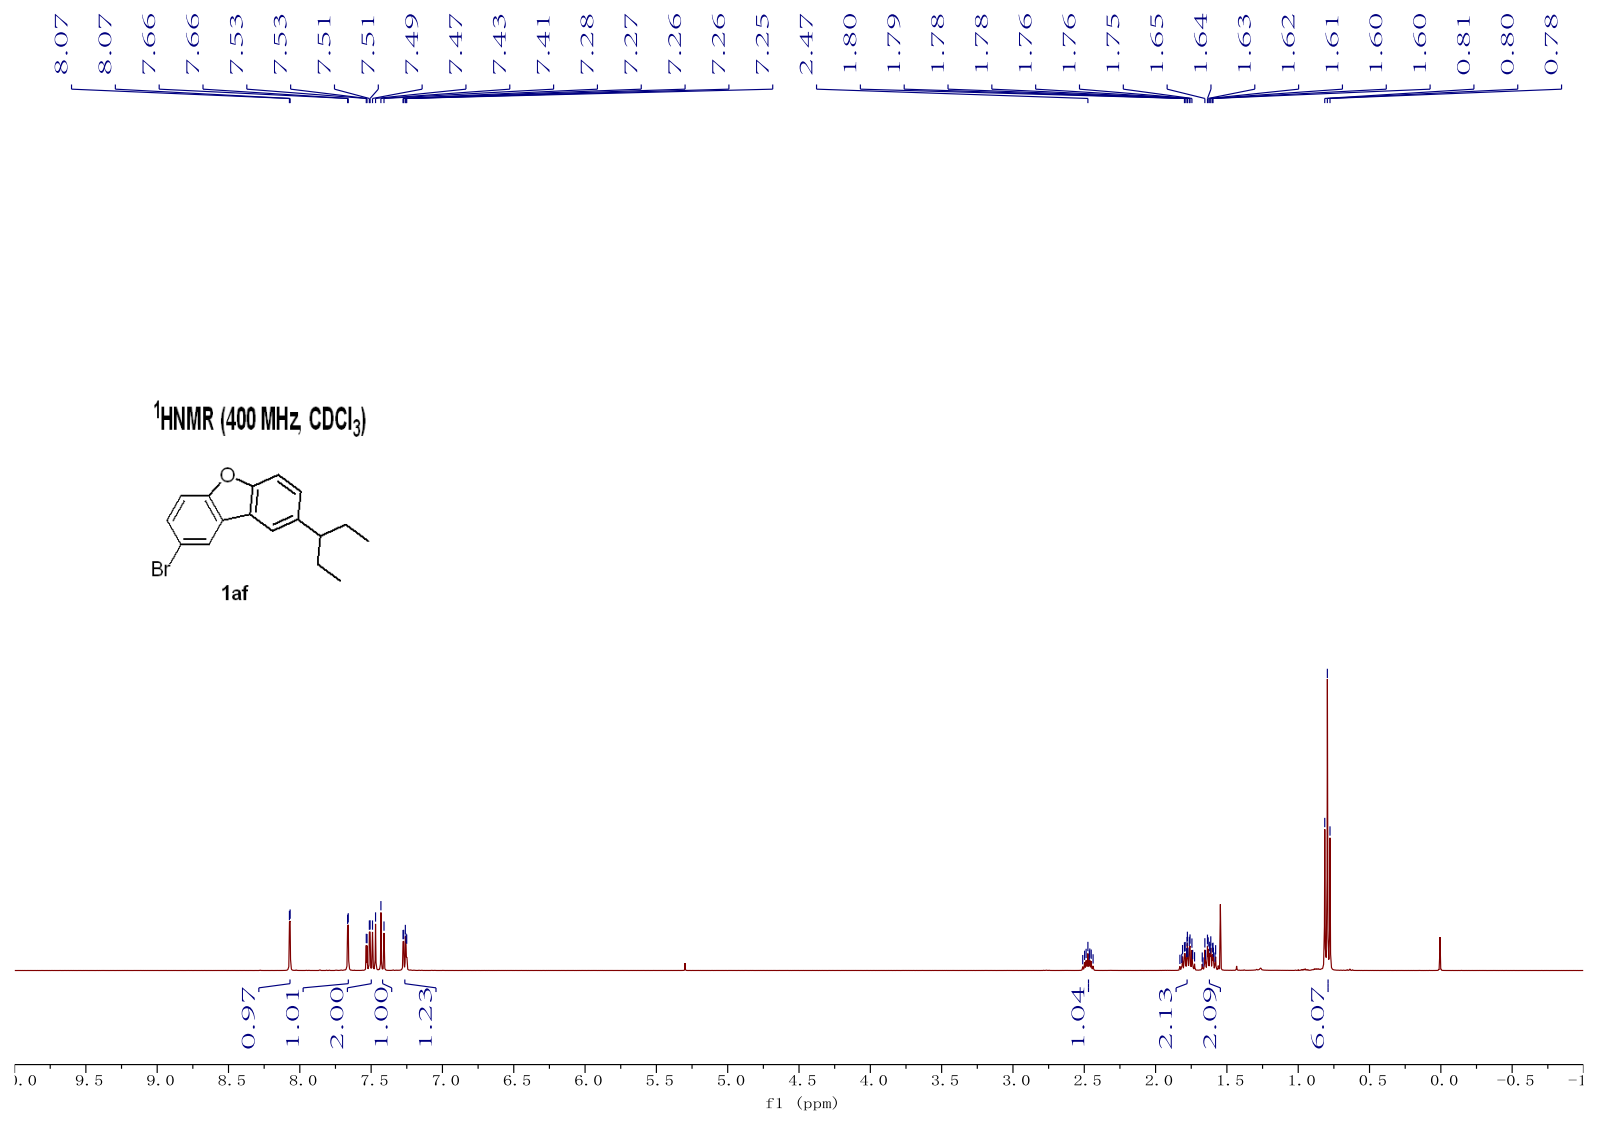

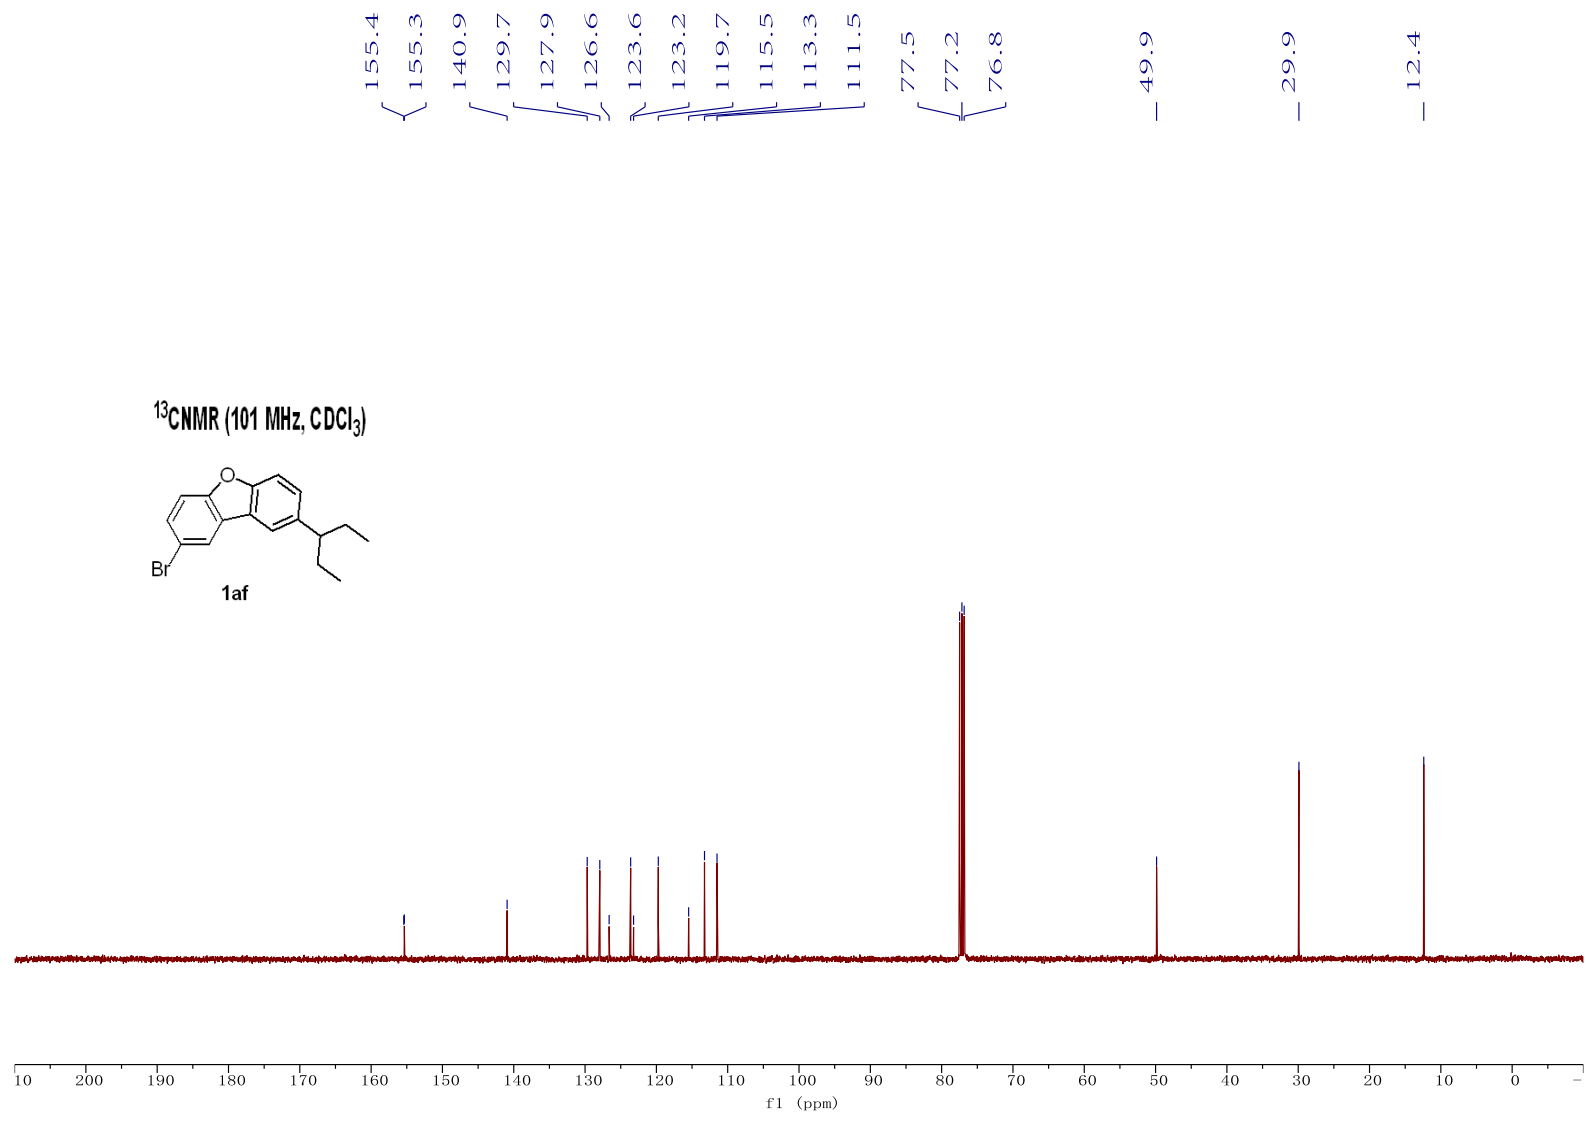

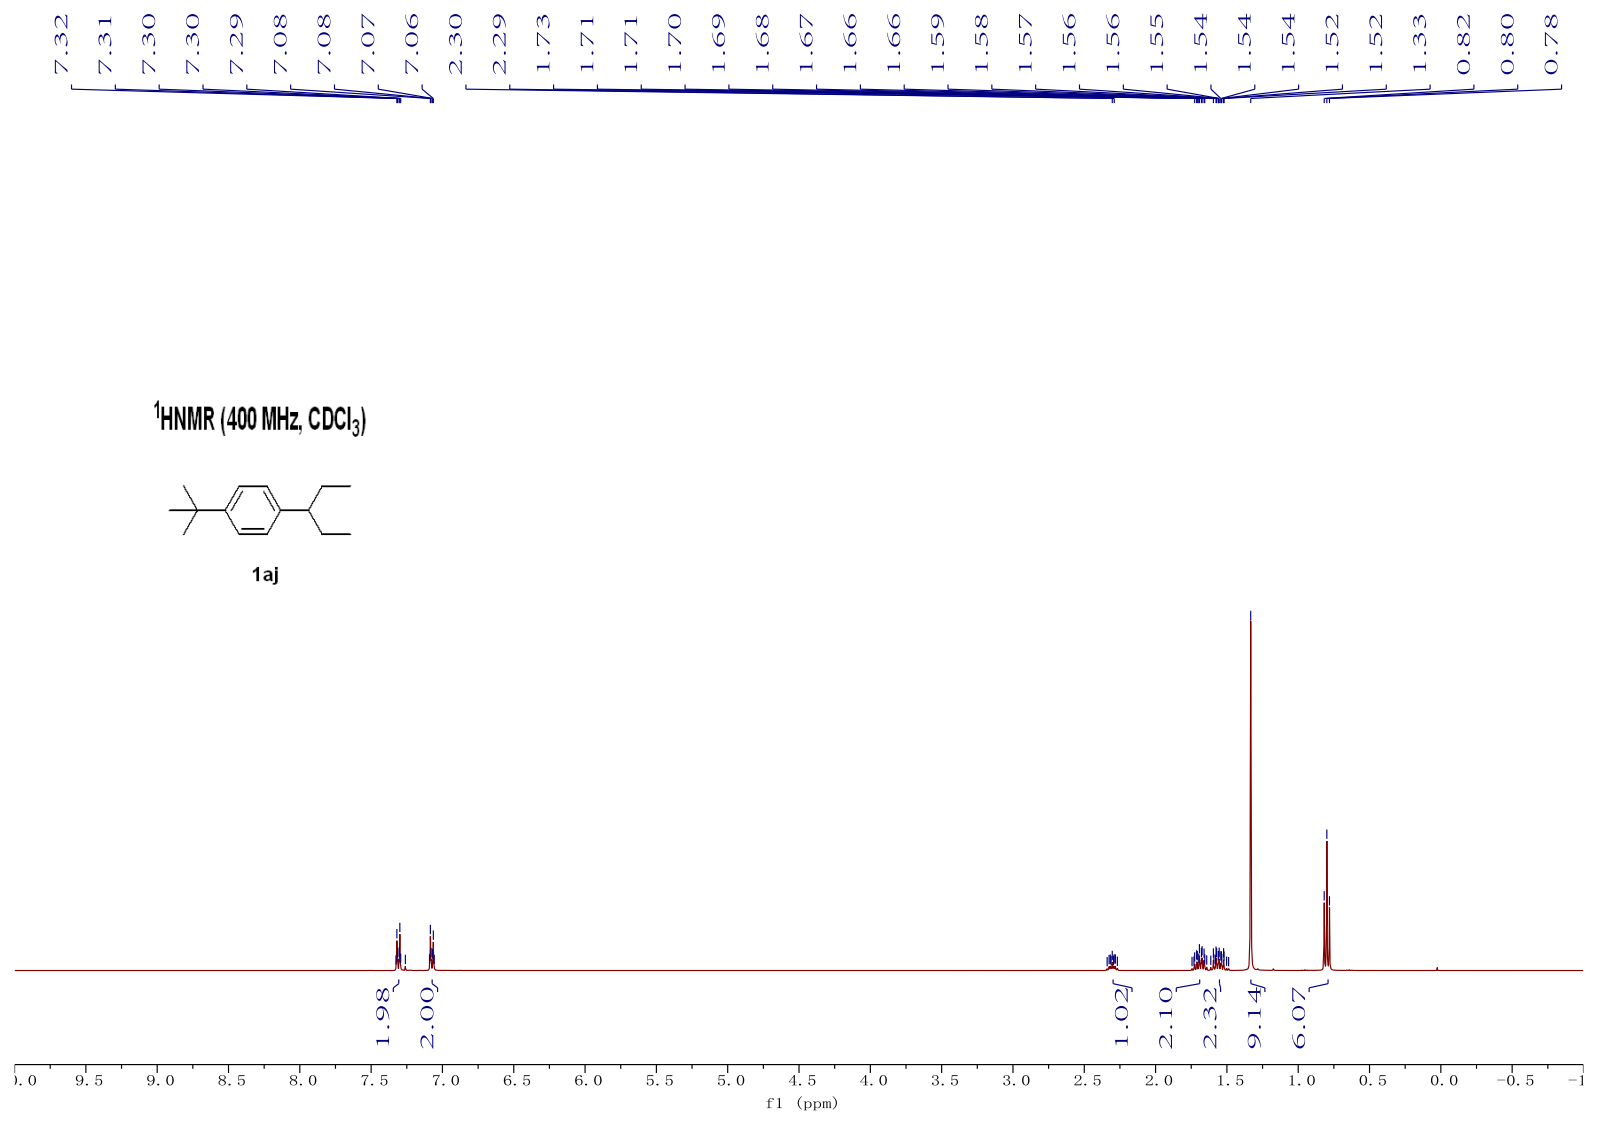

<sup>13</sup>CNMR (101 MHz, CDCl<sub>3</sub>)

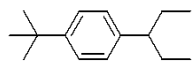

1aj

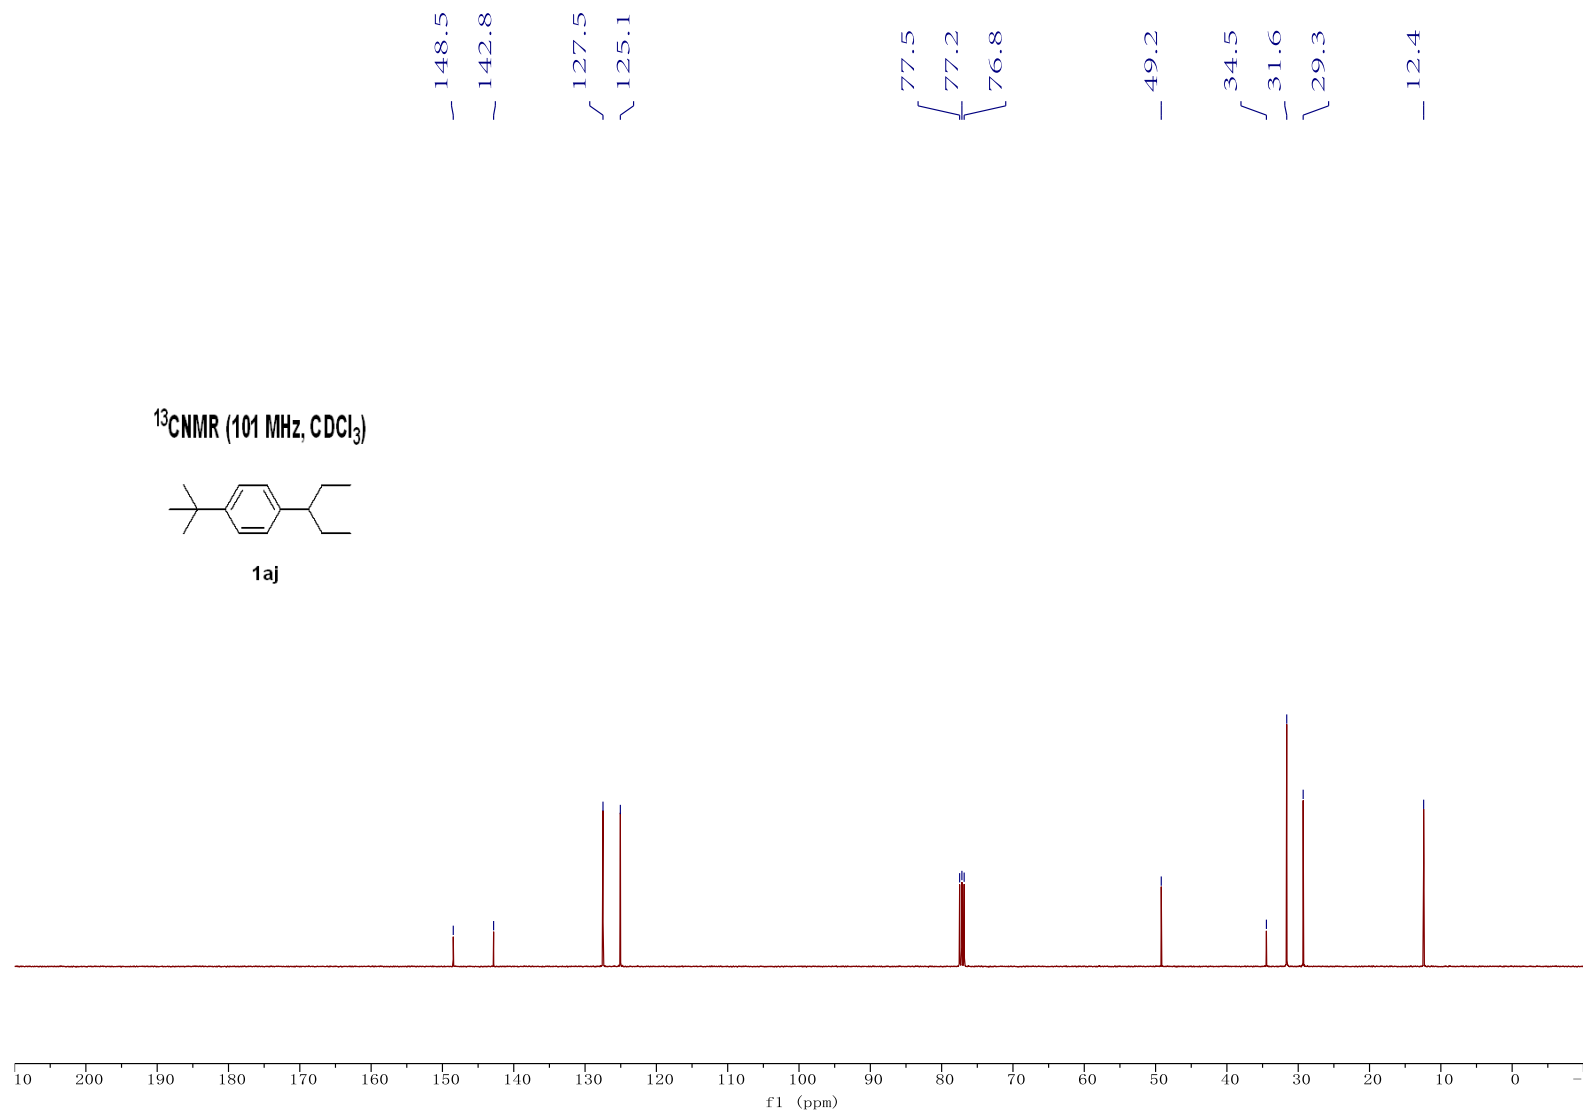

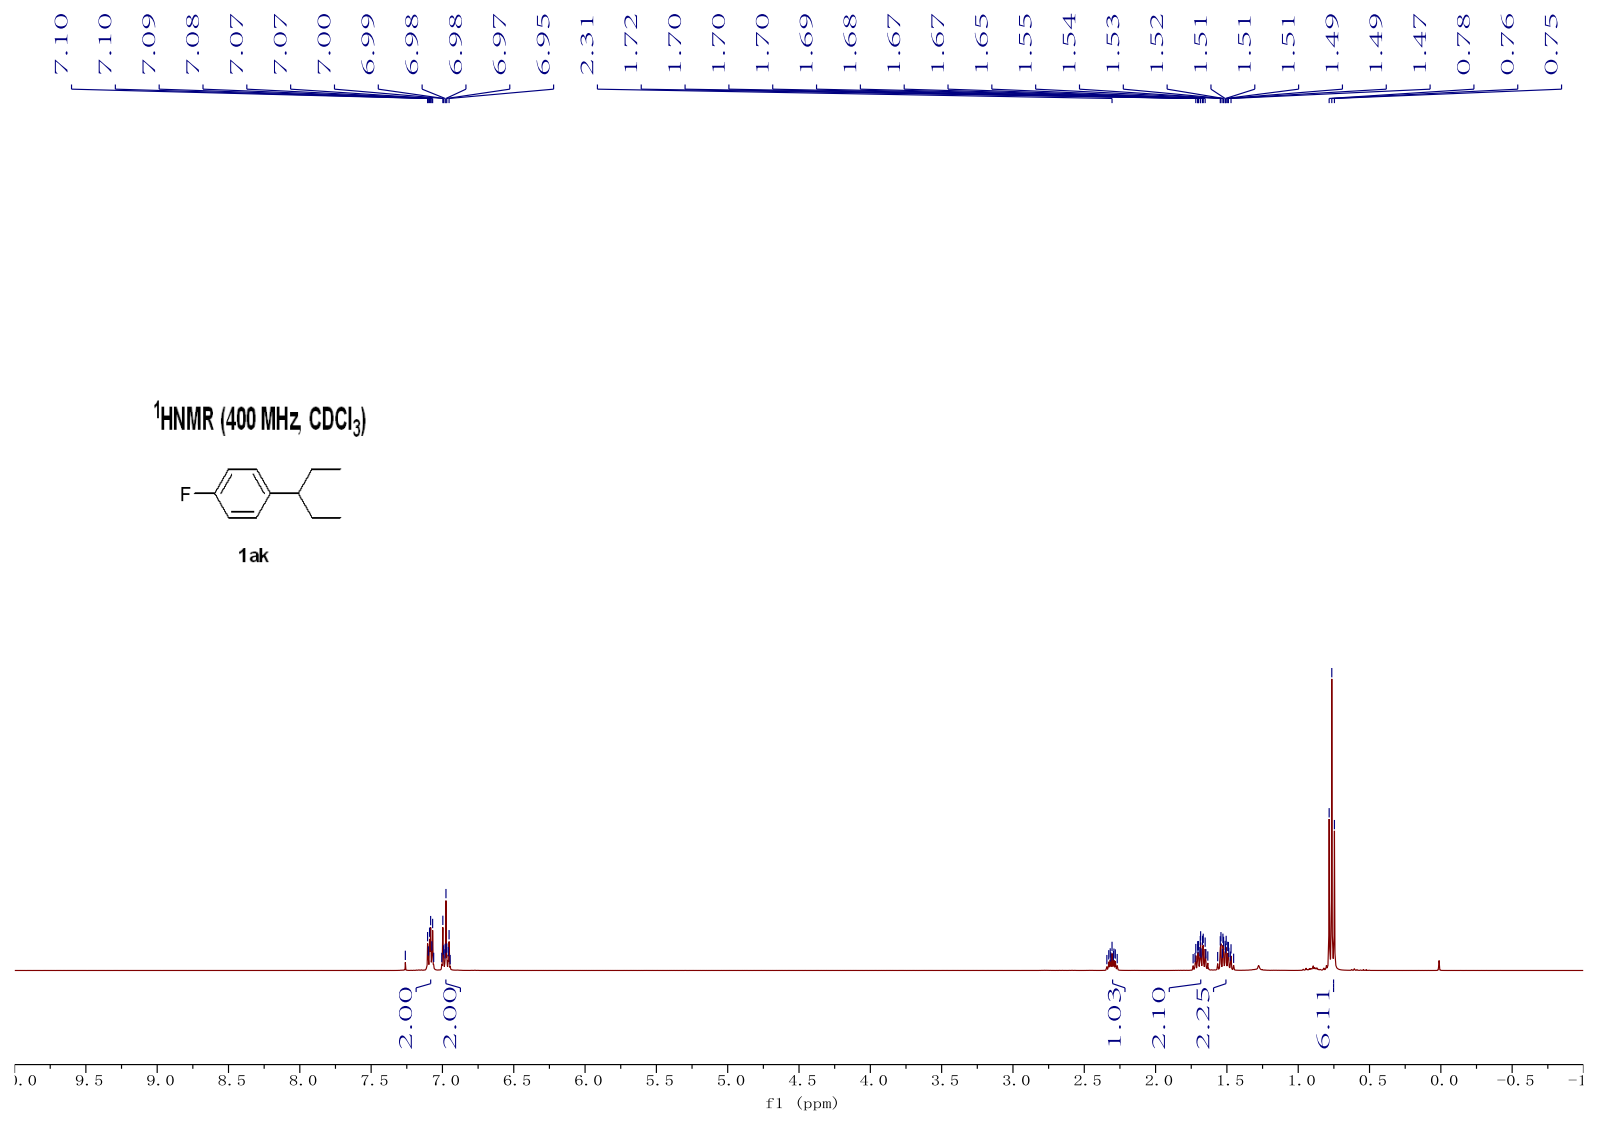

<sup>13</sup>CNMR (101 MHz, CDCl<sub>3</sub>)

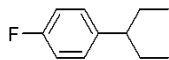

1ak

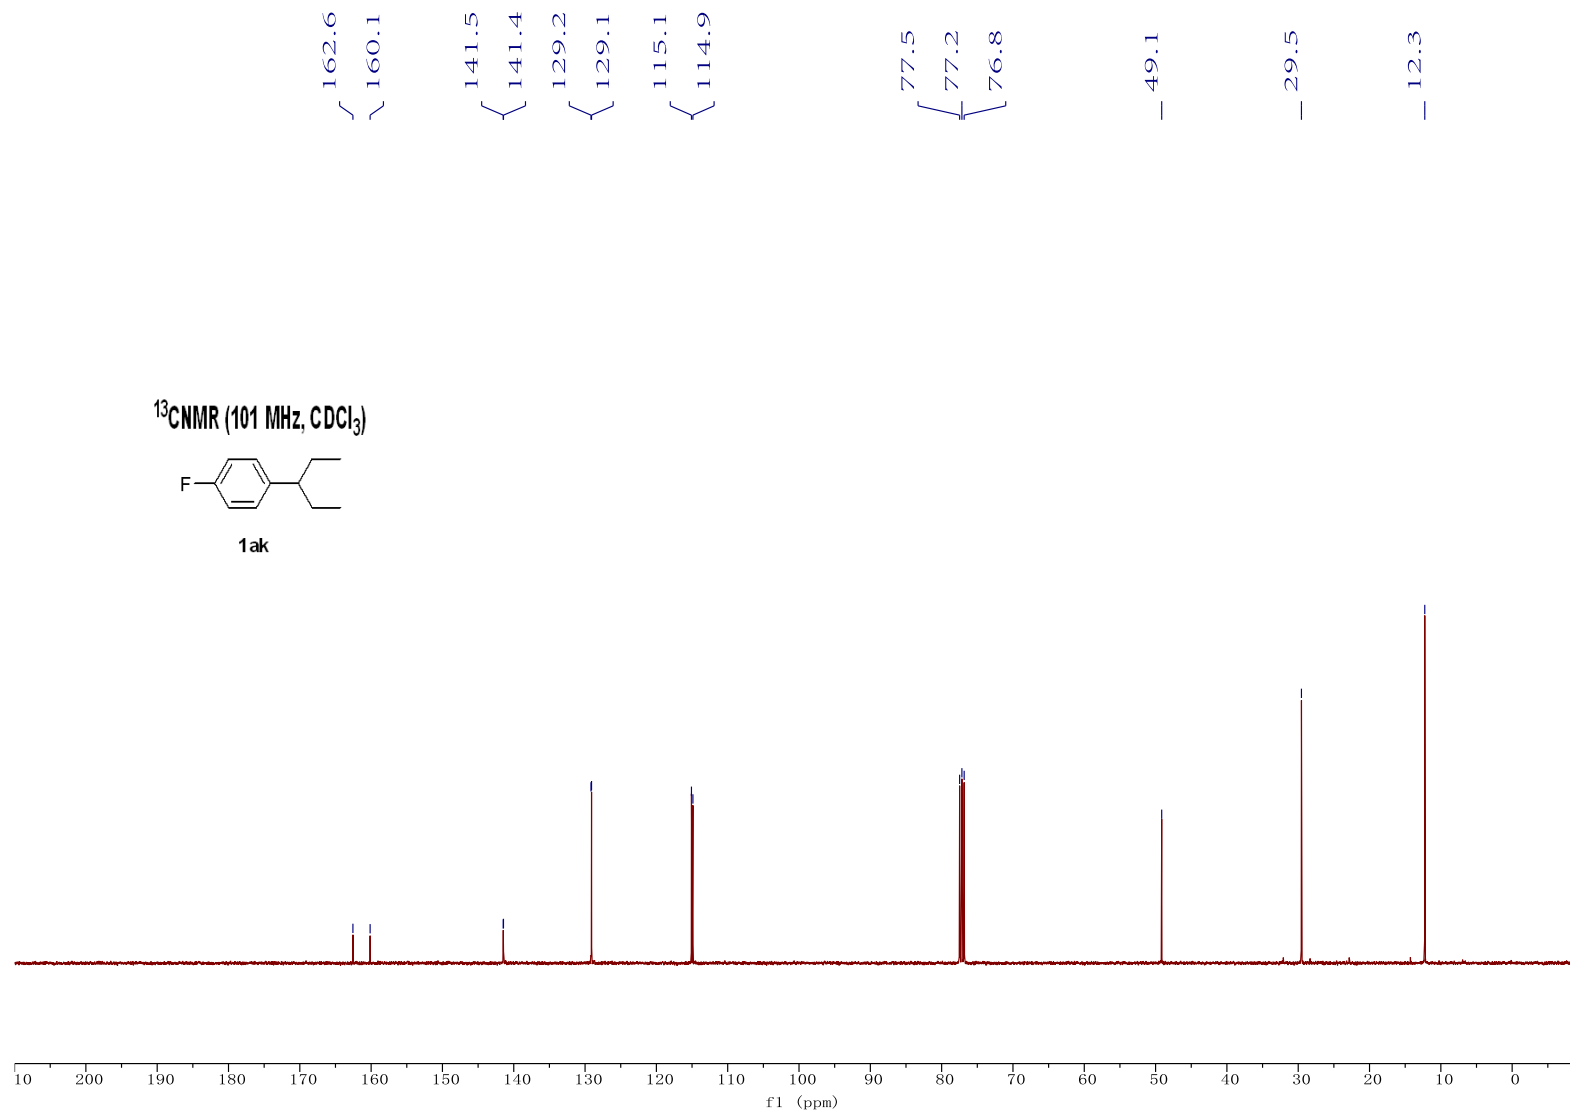

<sup>19</sup>F NMR (376 MHz, CDCl<sub>3</sub>)

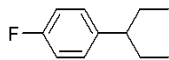

1ak

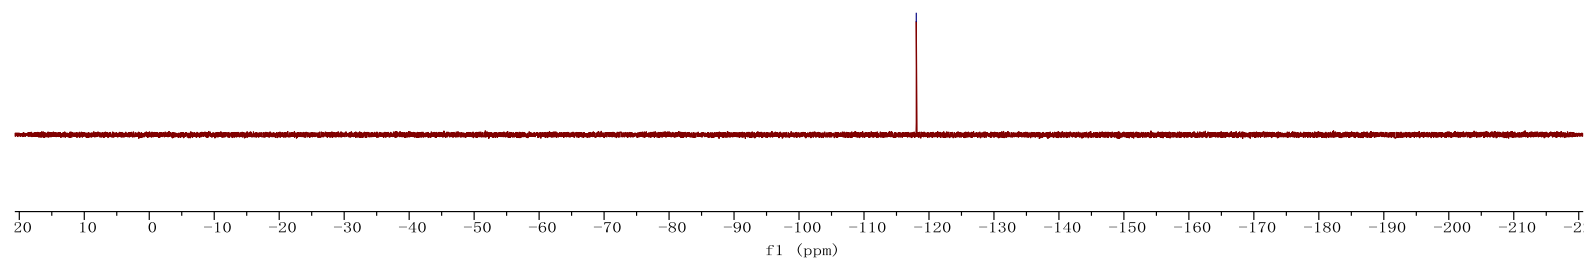

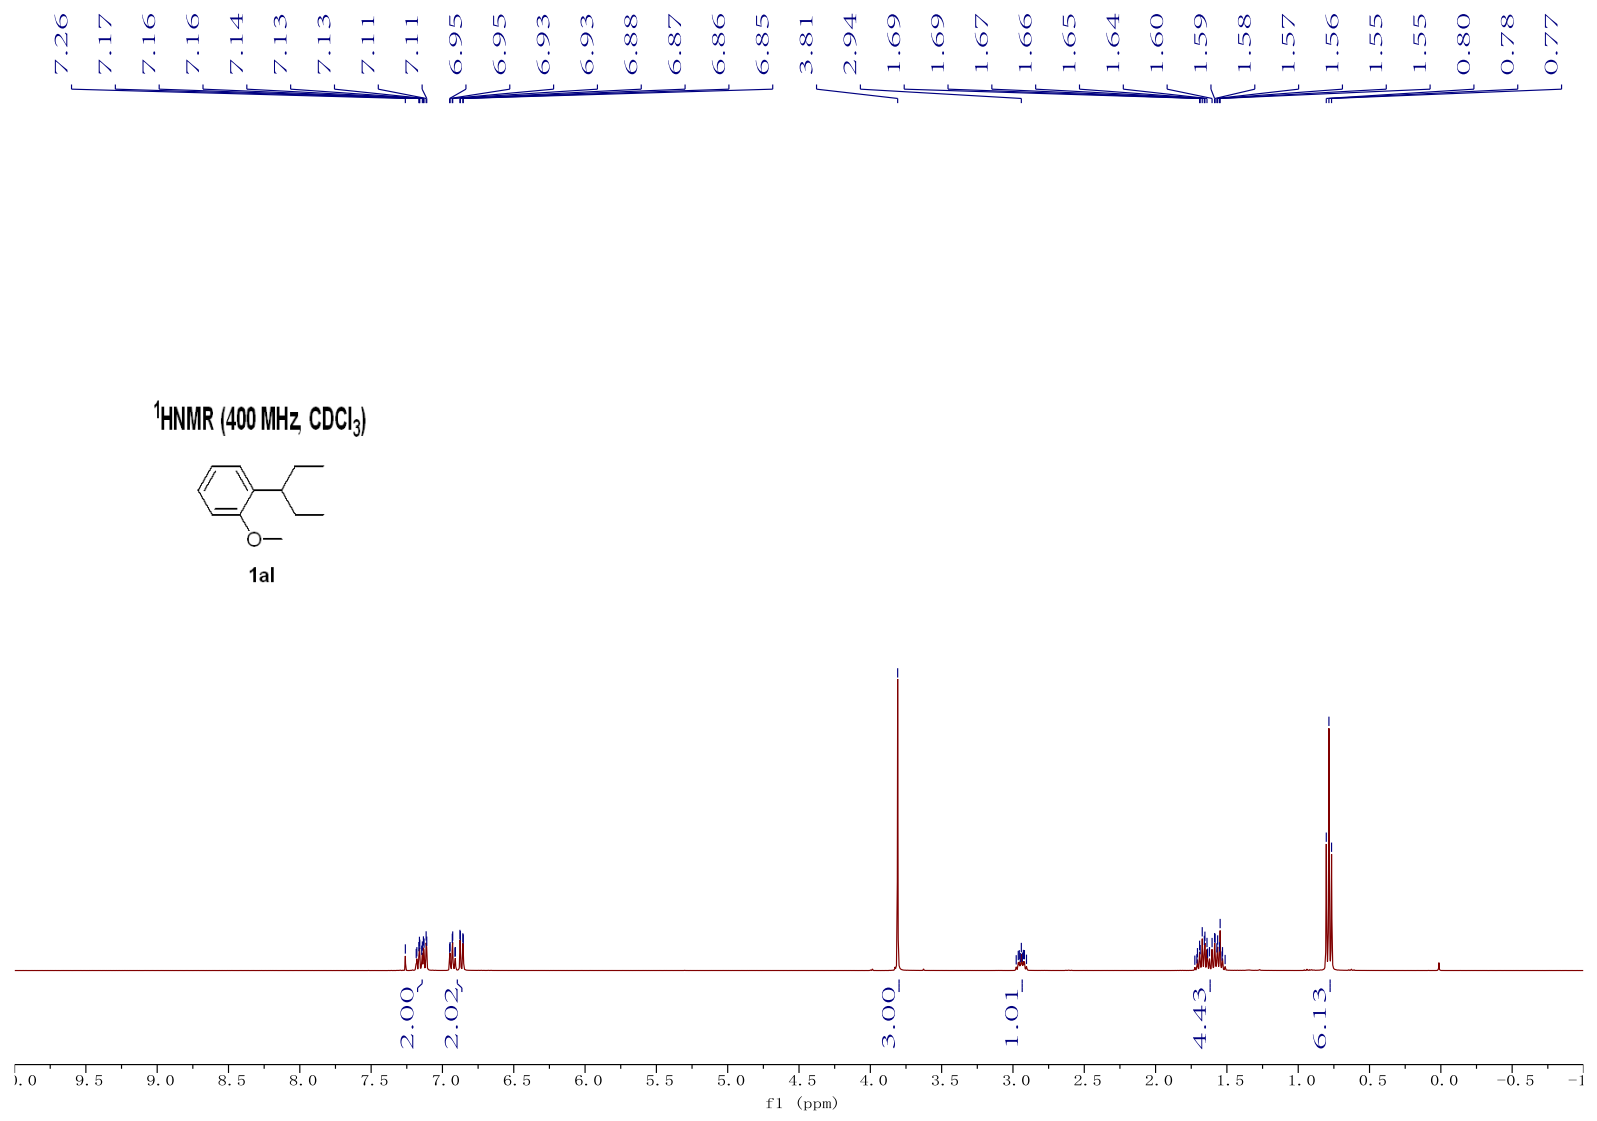



<sup>13</sup>CNMR (101 MHz, CDCl<sub>3</sub>)

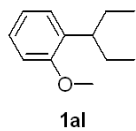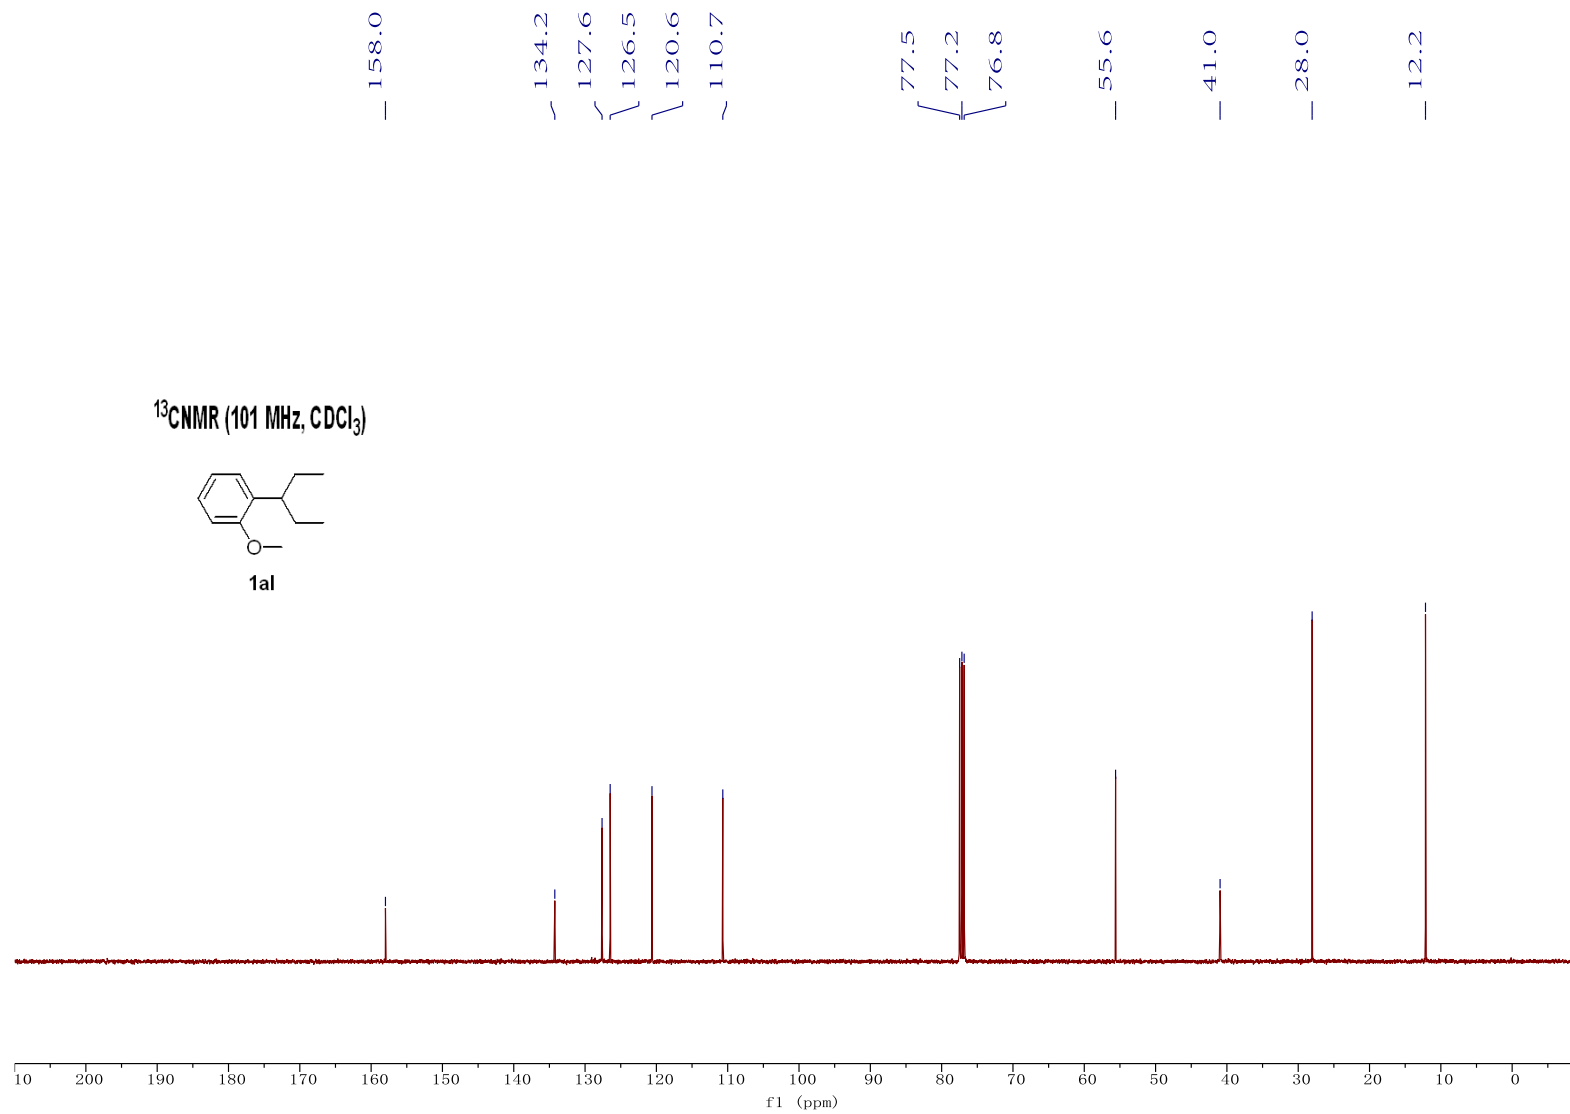

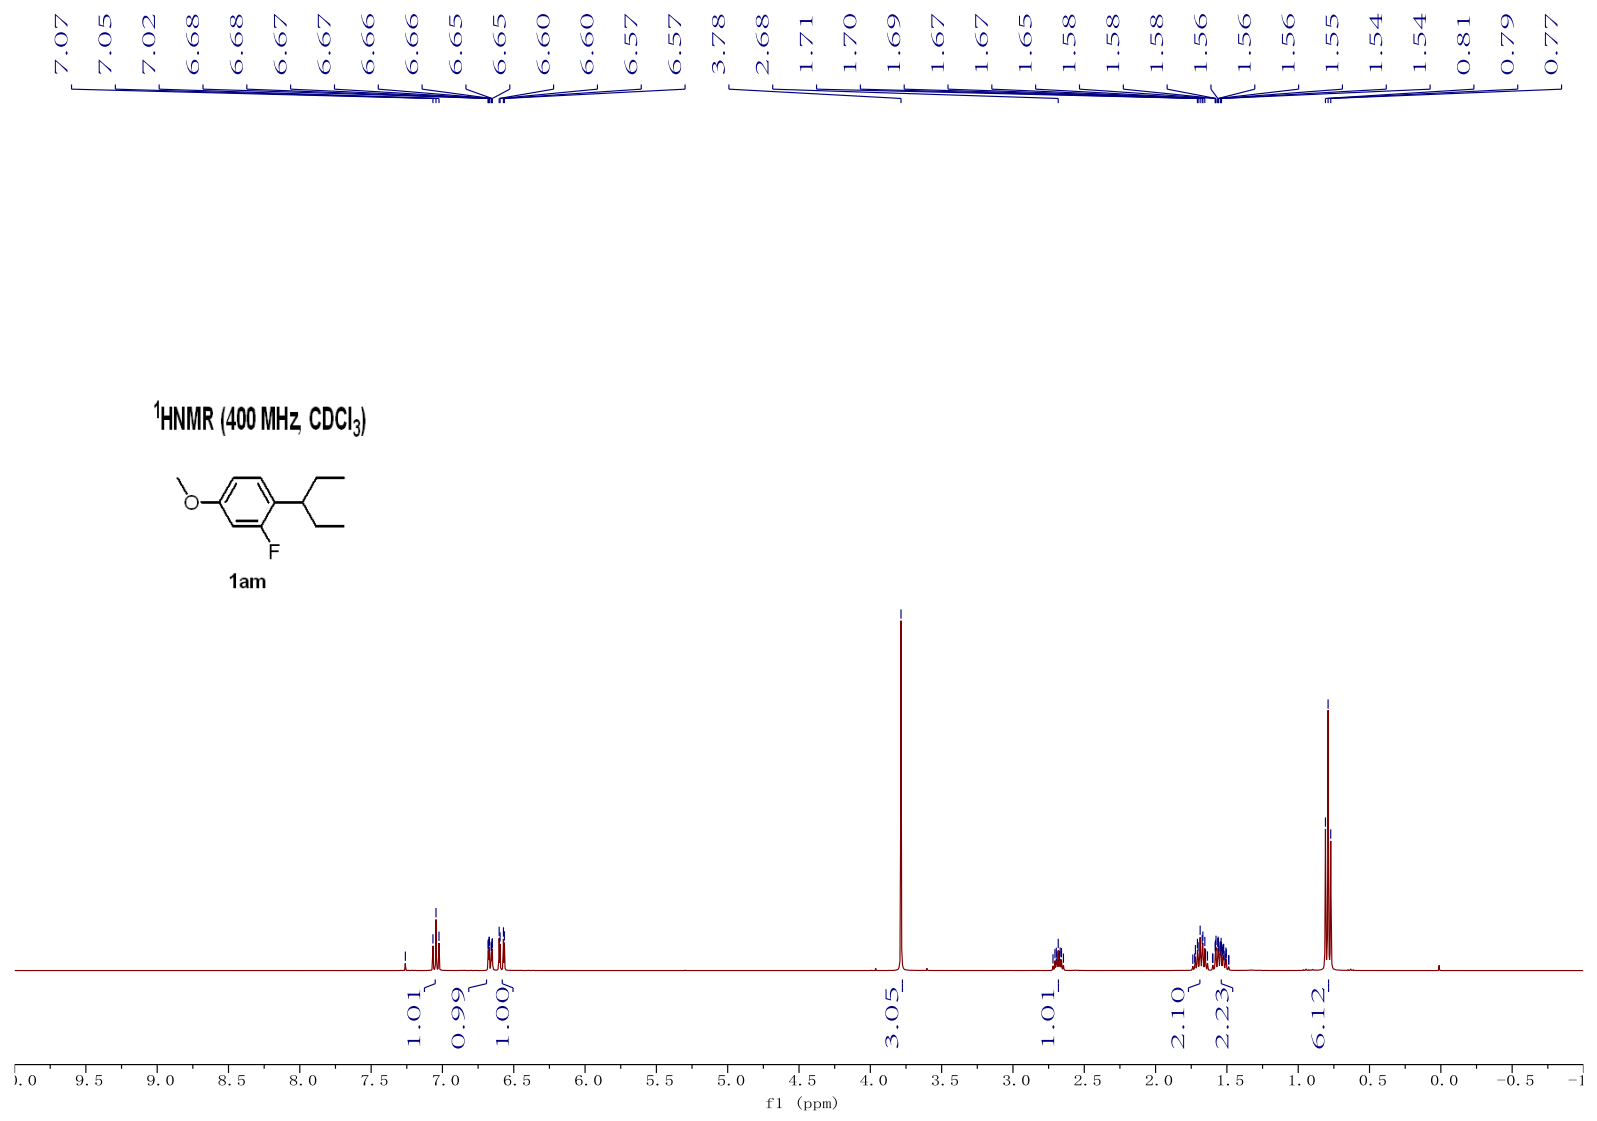

<sup>13</sup>CNMR (101 MHz, CDCl<sub>3</sub>)

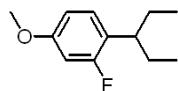

1am

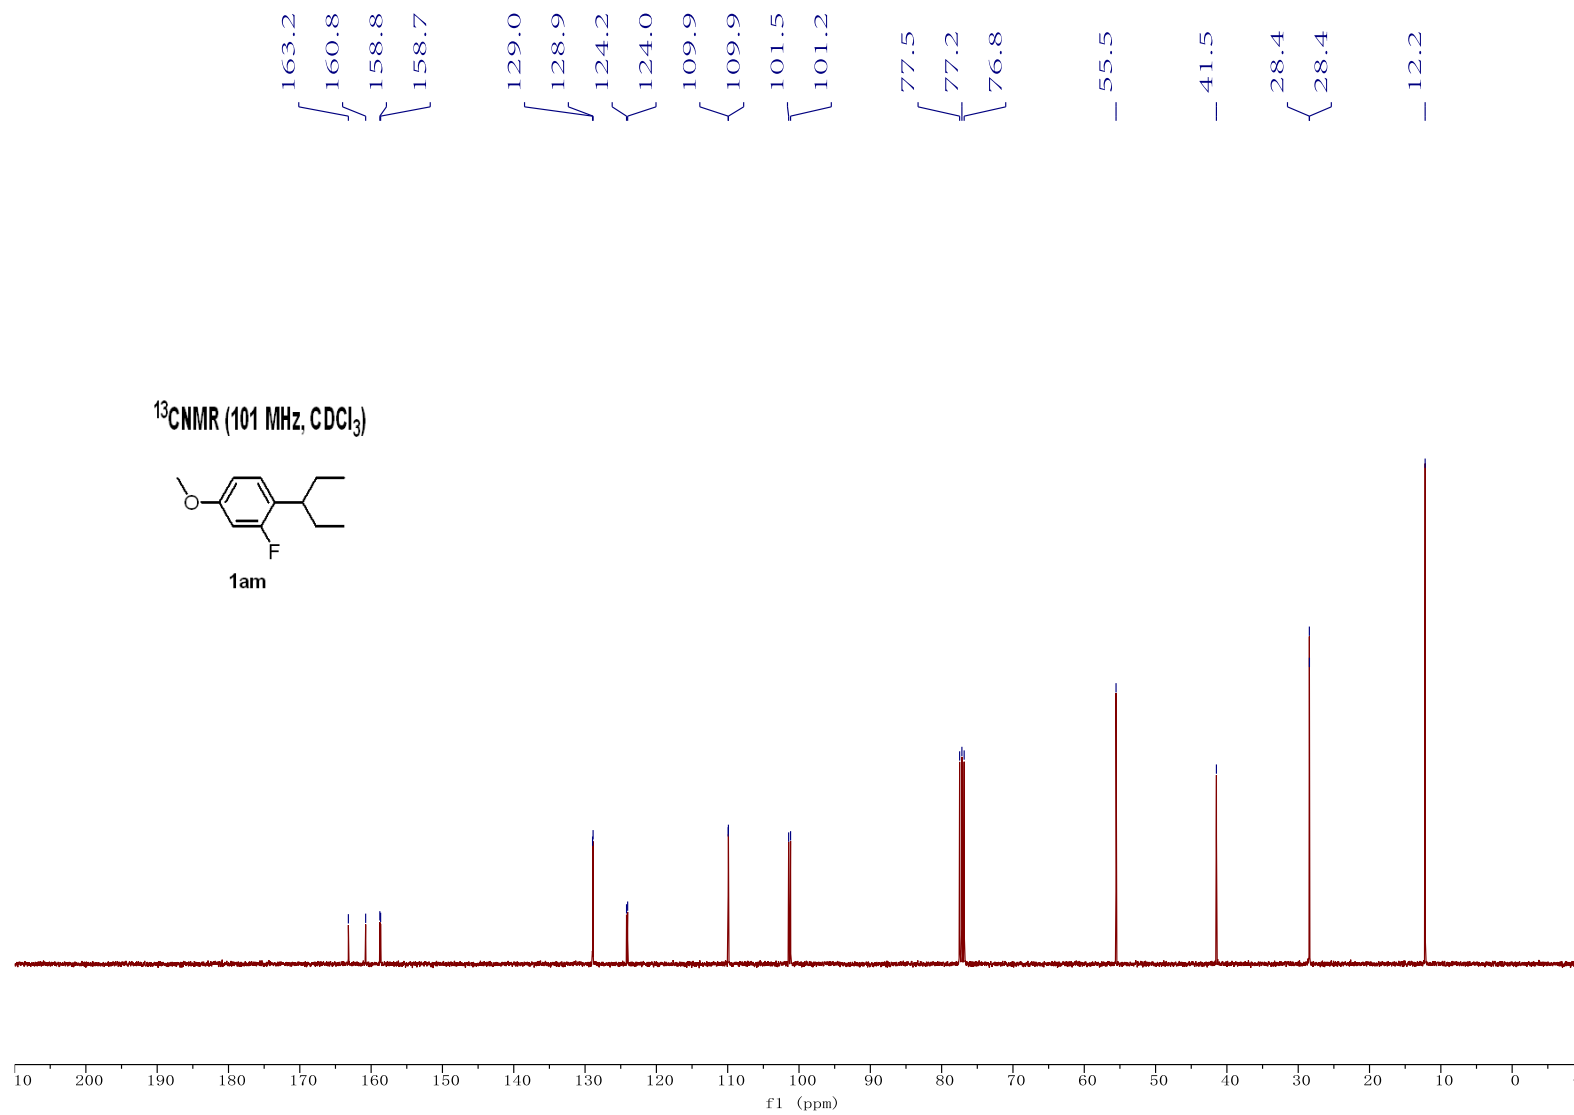

<sup>19</sup>F NMR (376 MHz, CDCl<sub>3</sub>)

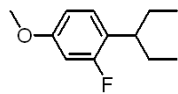

**1am**

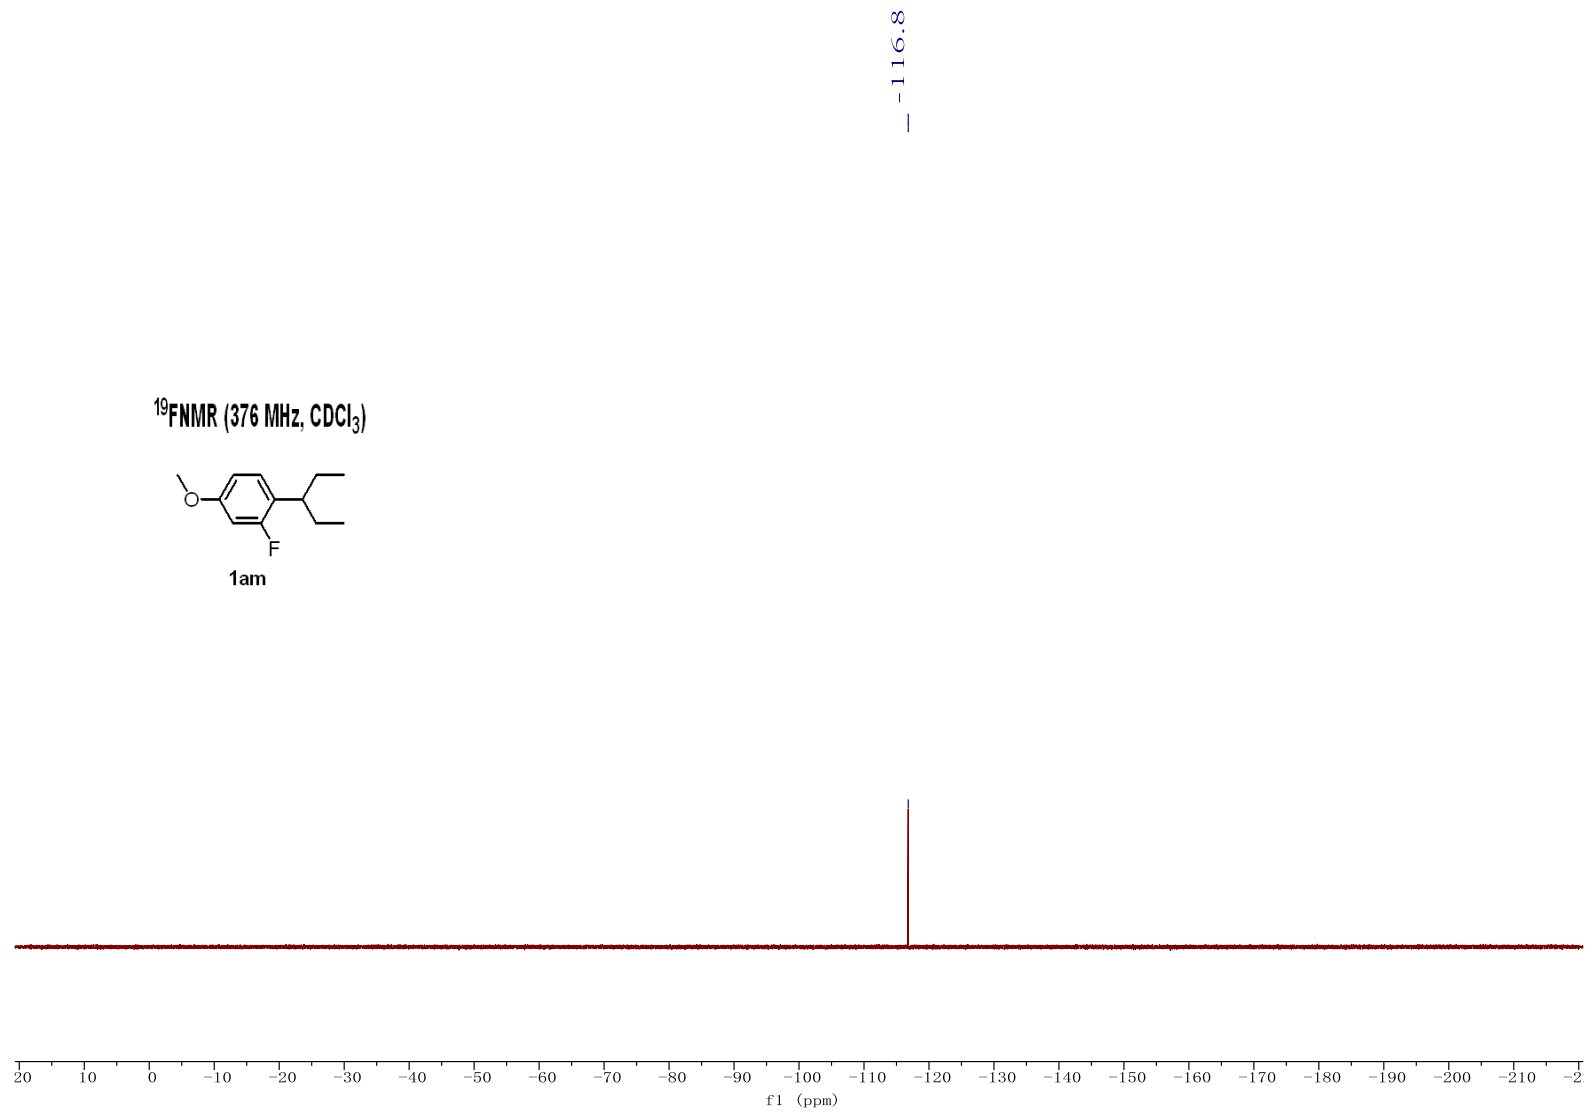

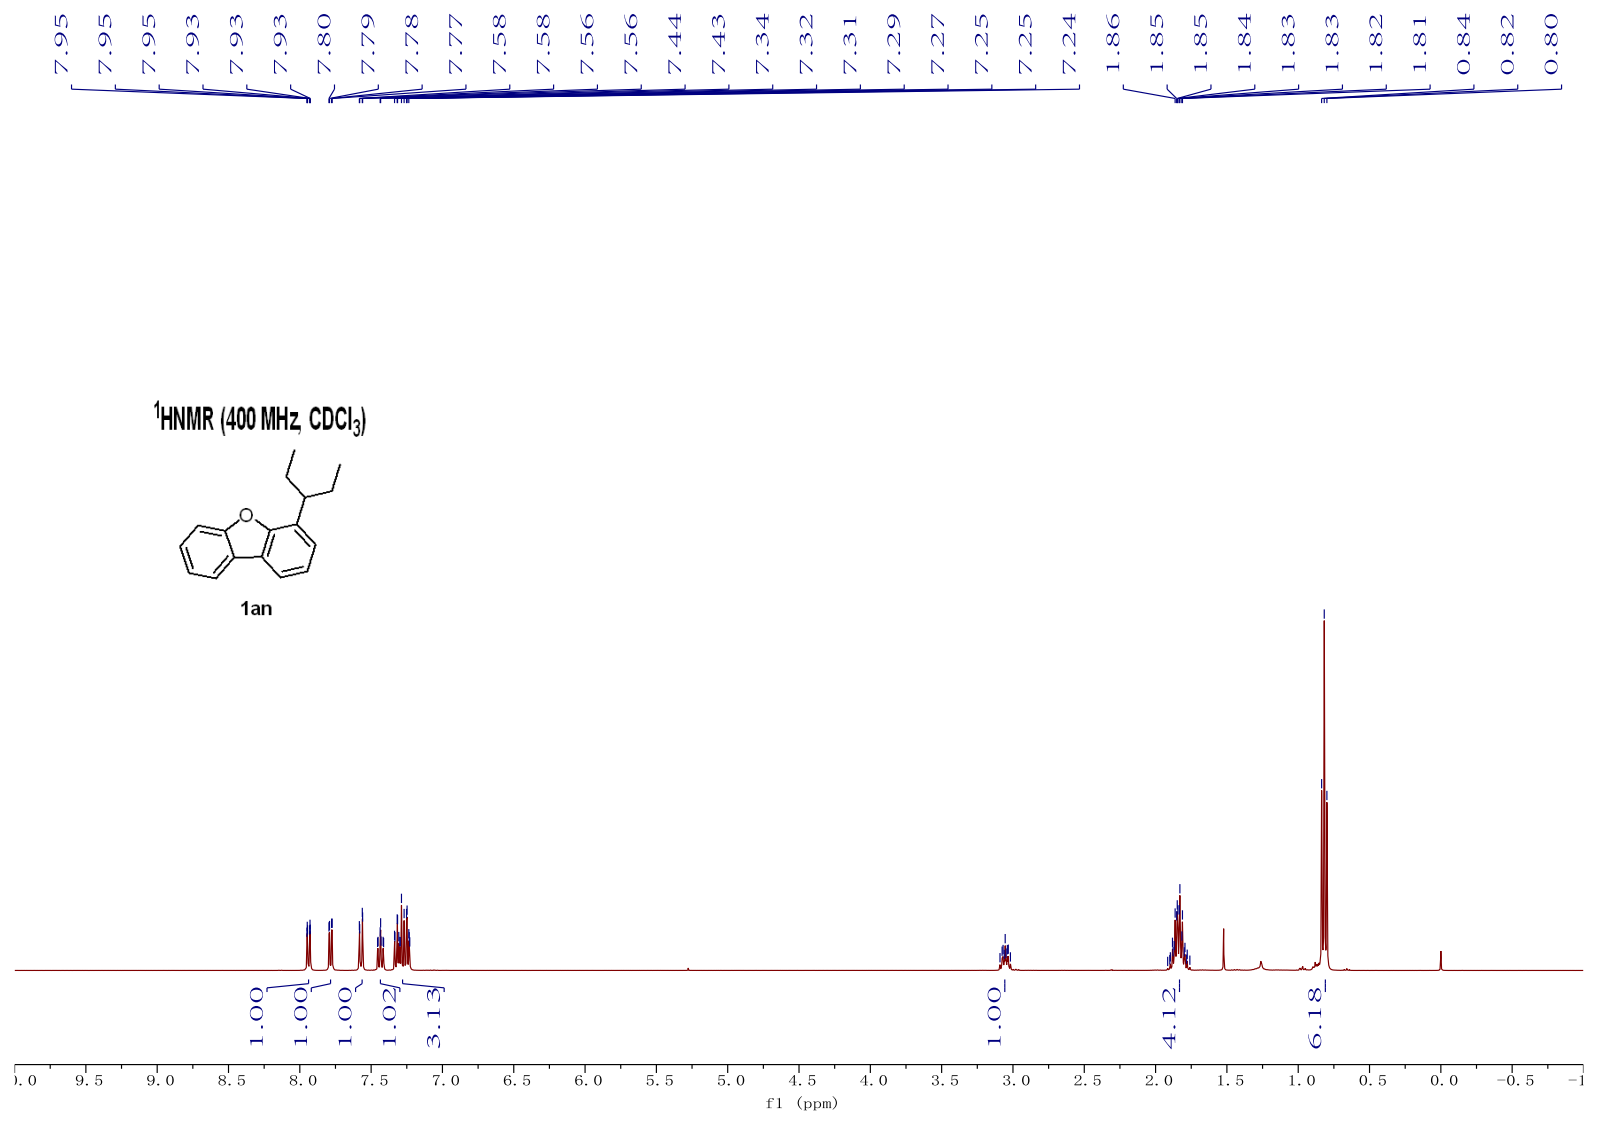

<sup>13</sup>CNMR (101 MHz, CDCl<sub>3</sub>)

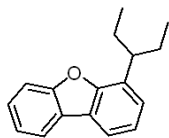

1an

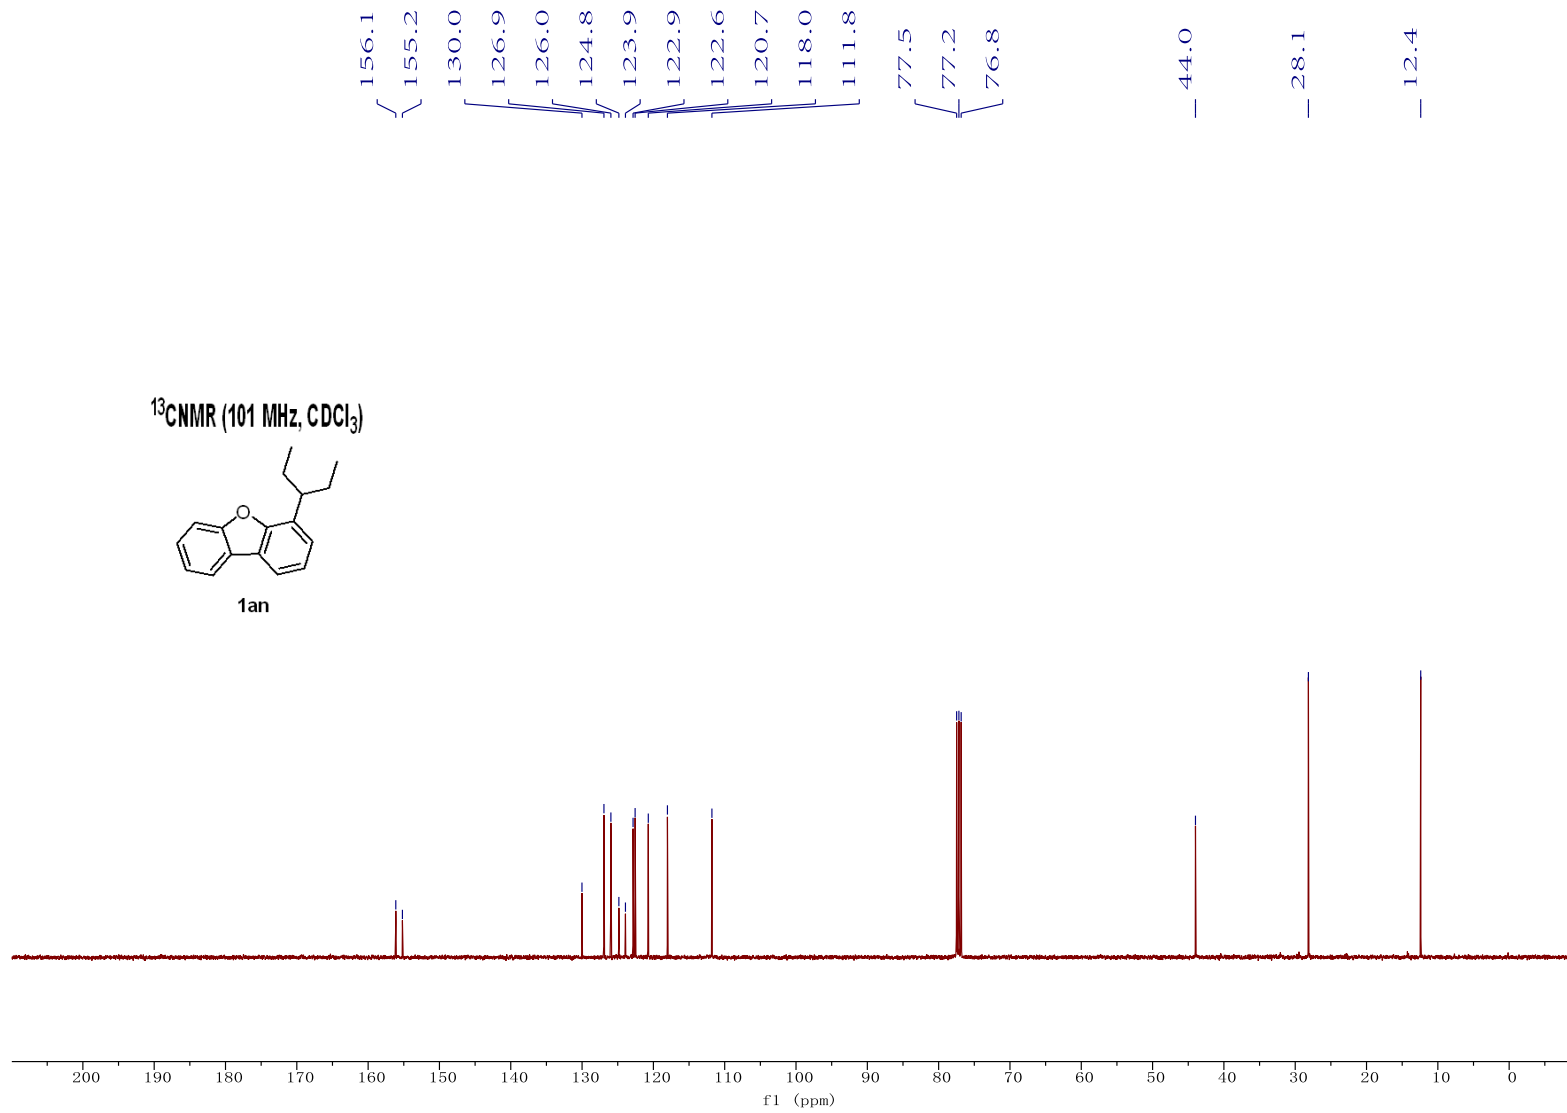

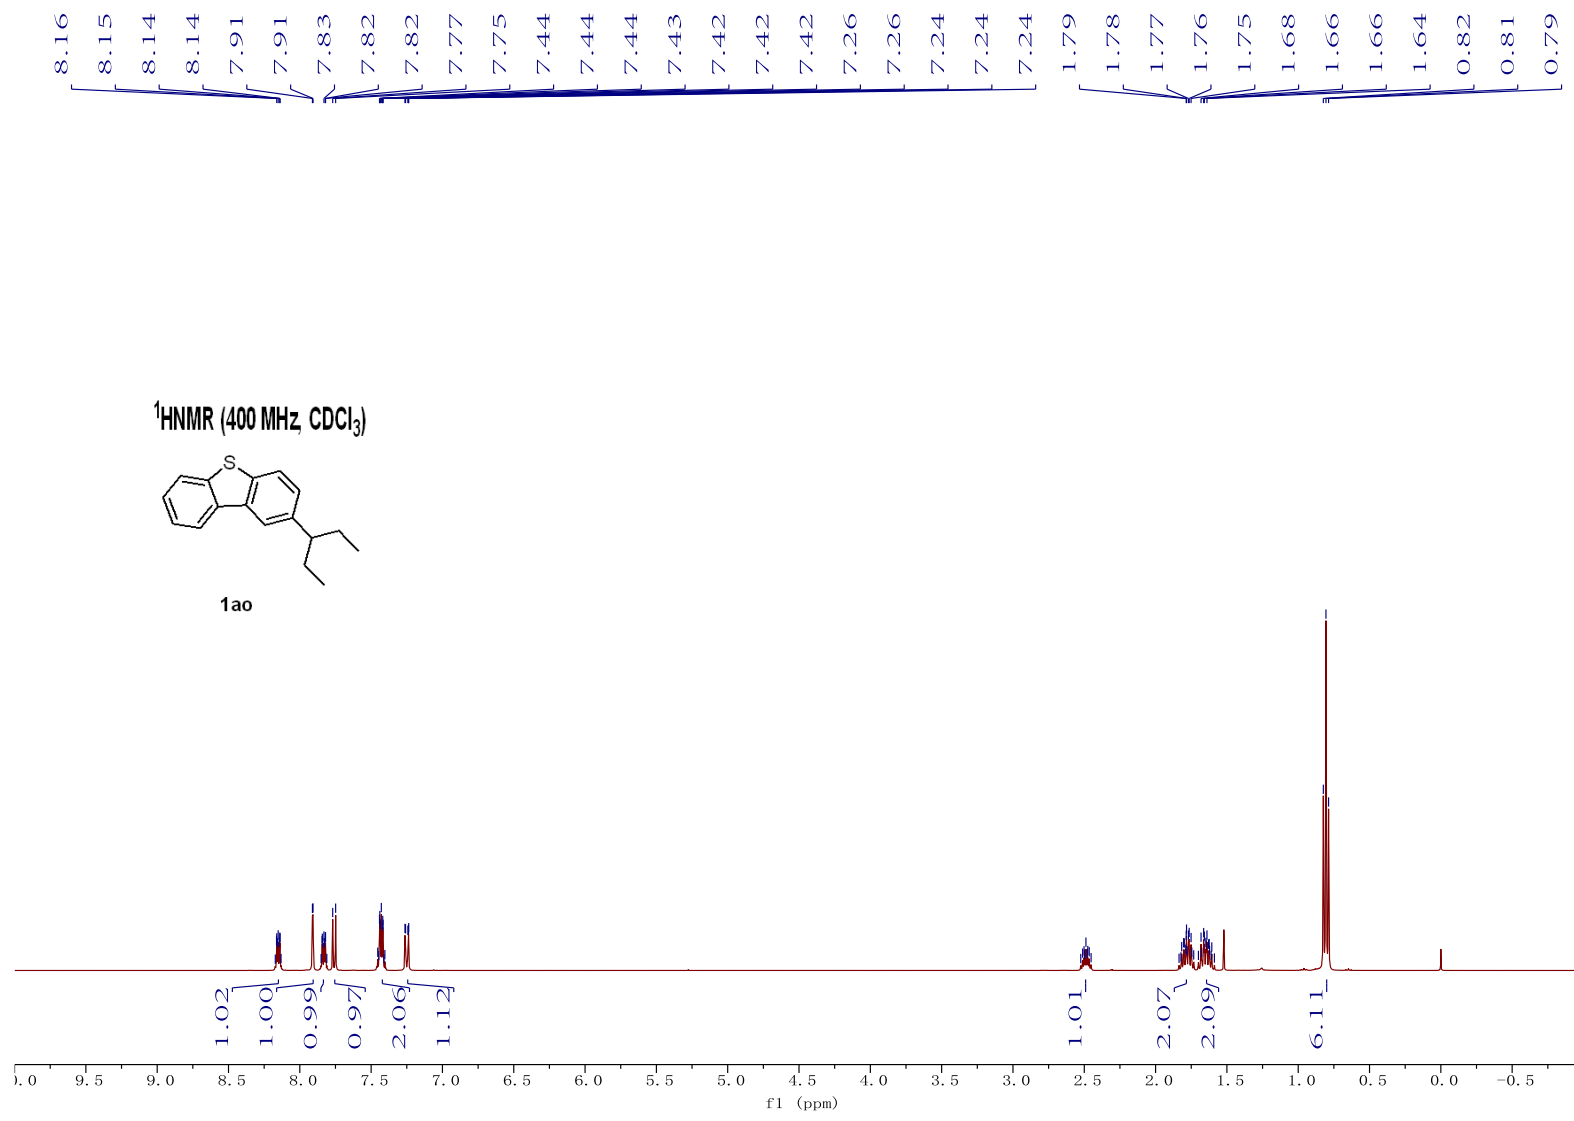

<sup>13</sup>CNMR (101 MHz, CDCl<sub>3</sub>)

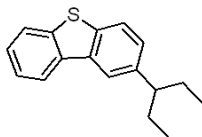

**1ao**

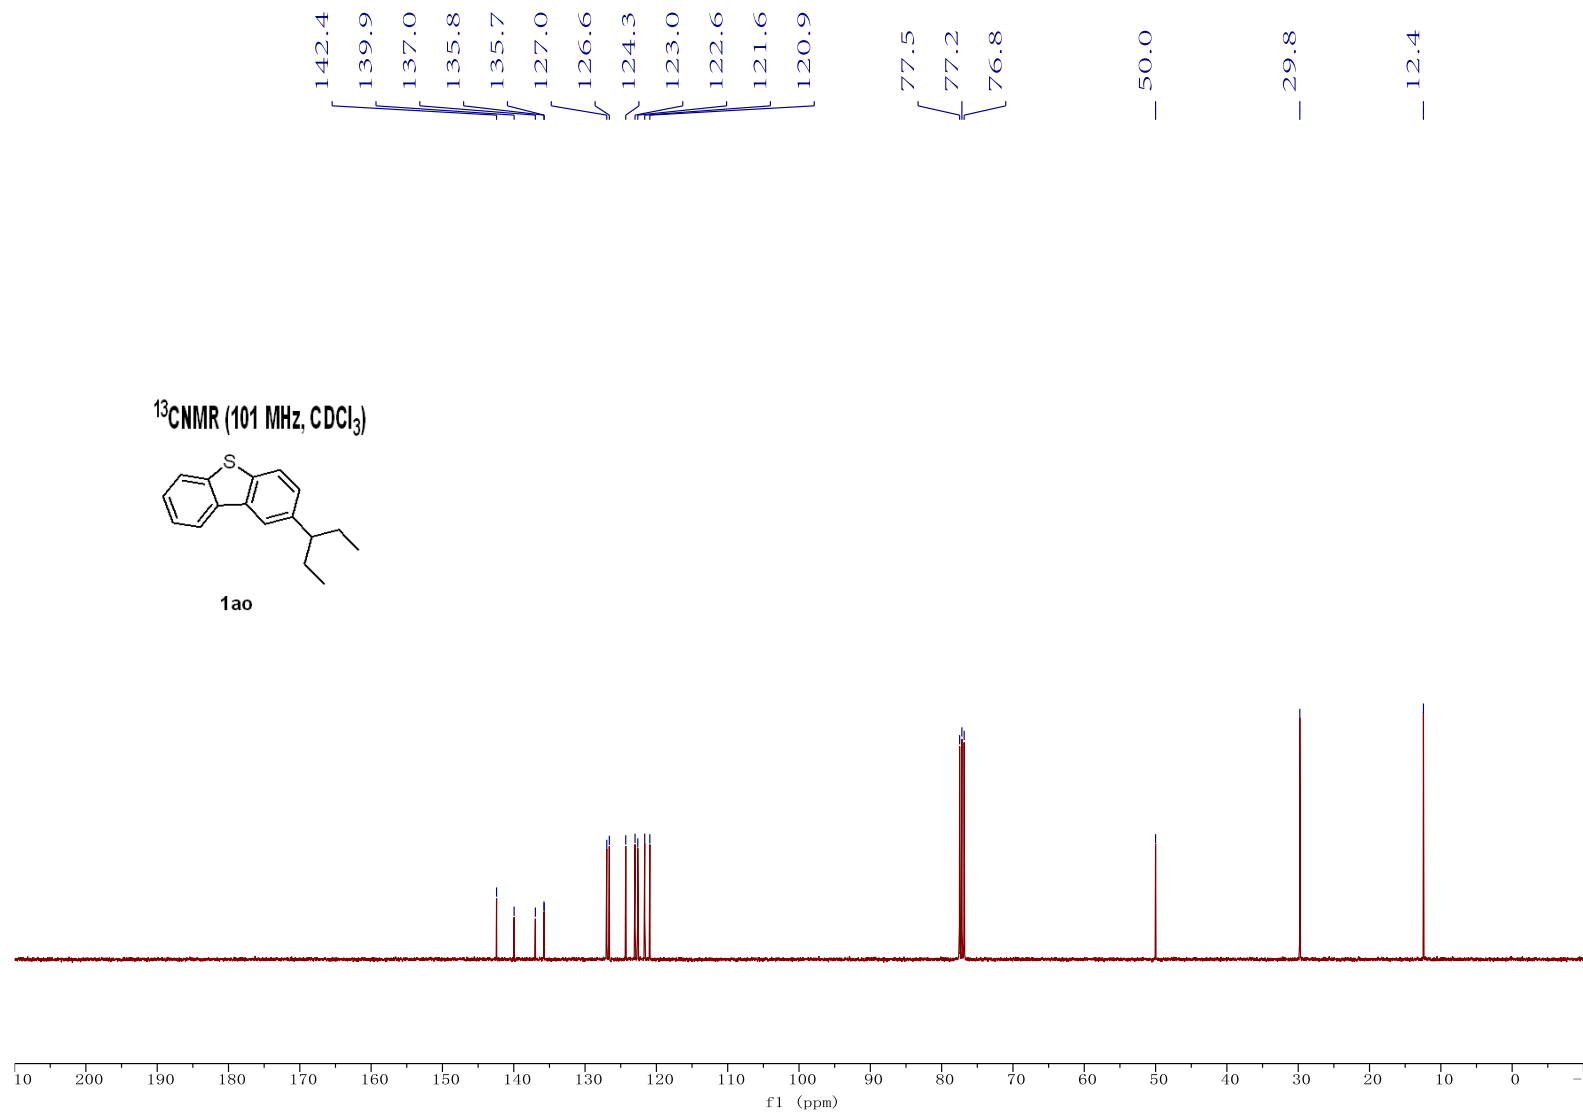



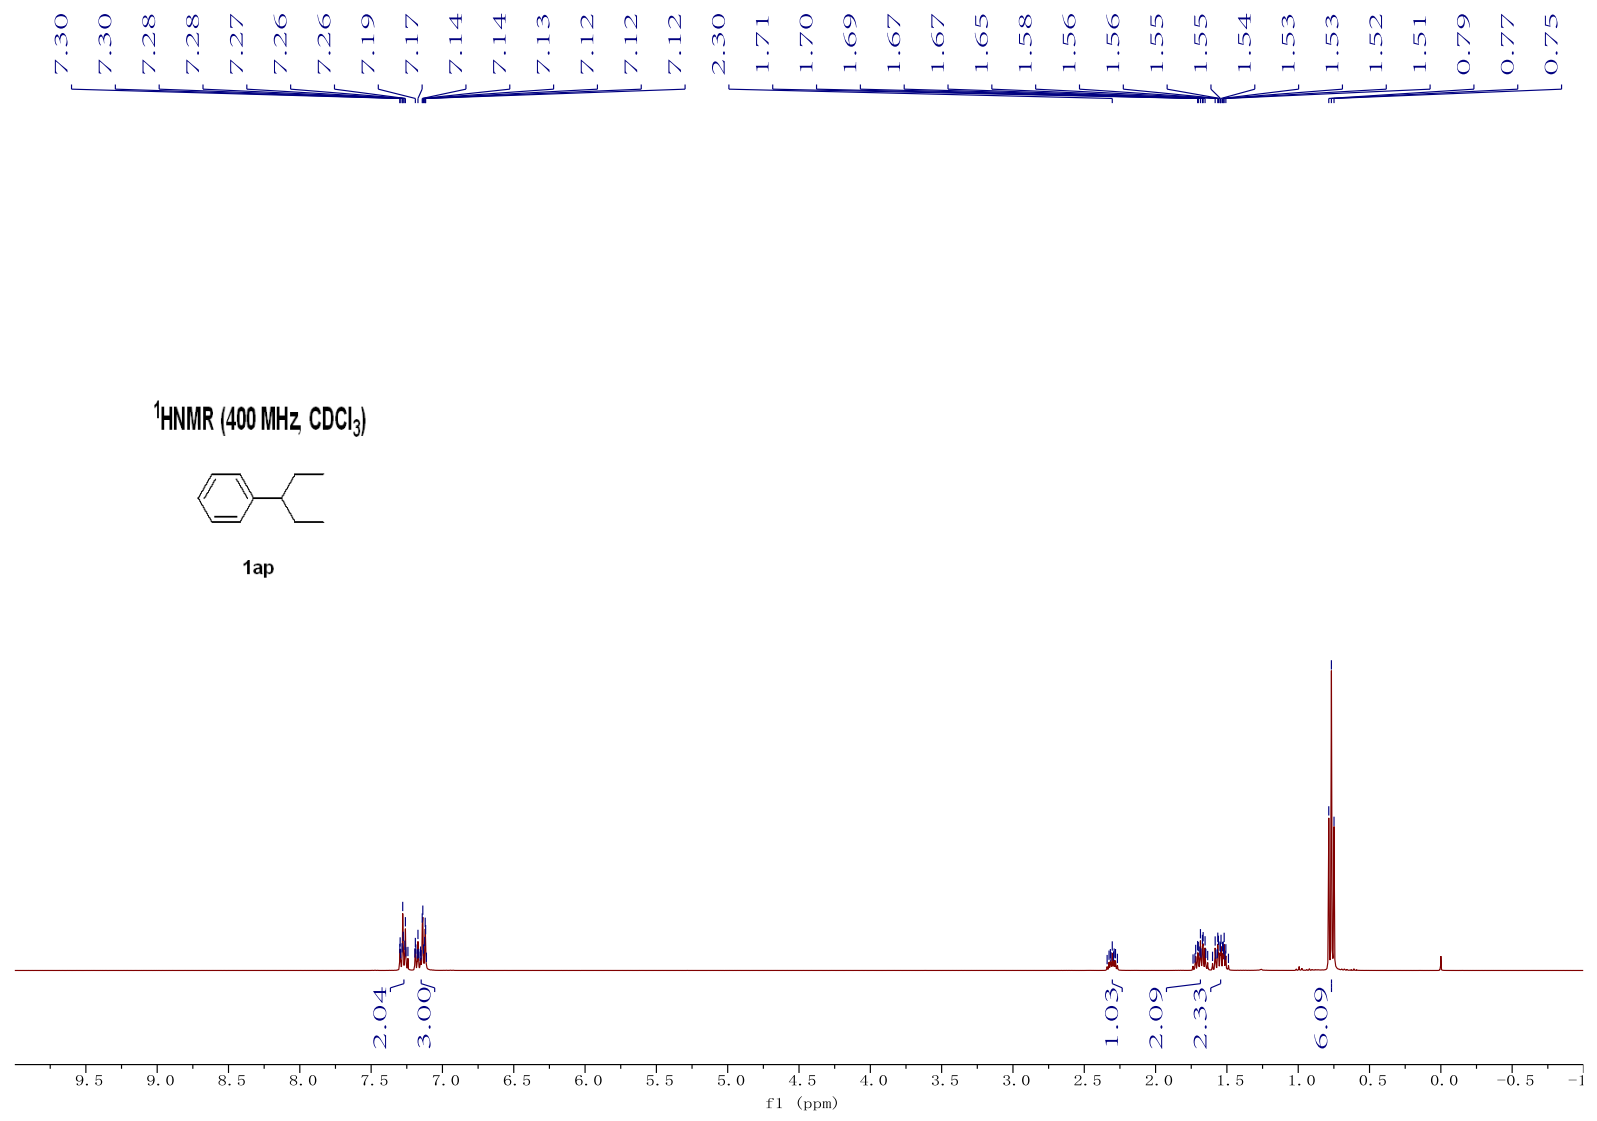

<sup>13</sup>CNMR (101 MHz, CDCl<sub>3</sub>)

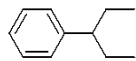

1ap

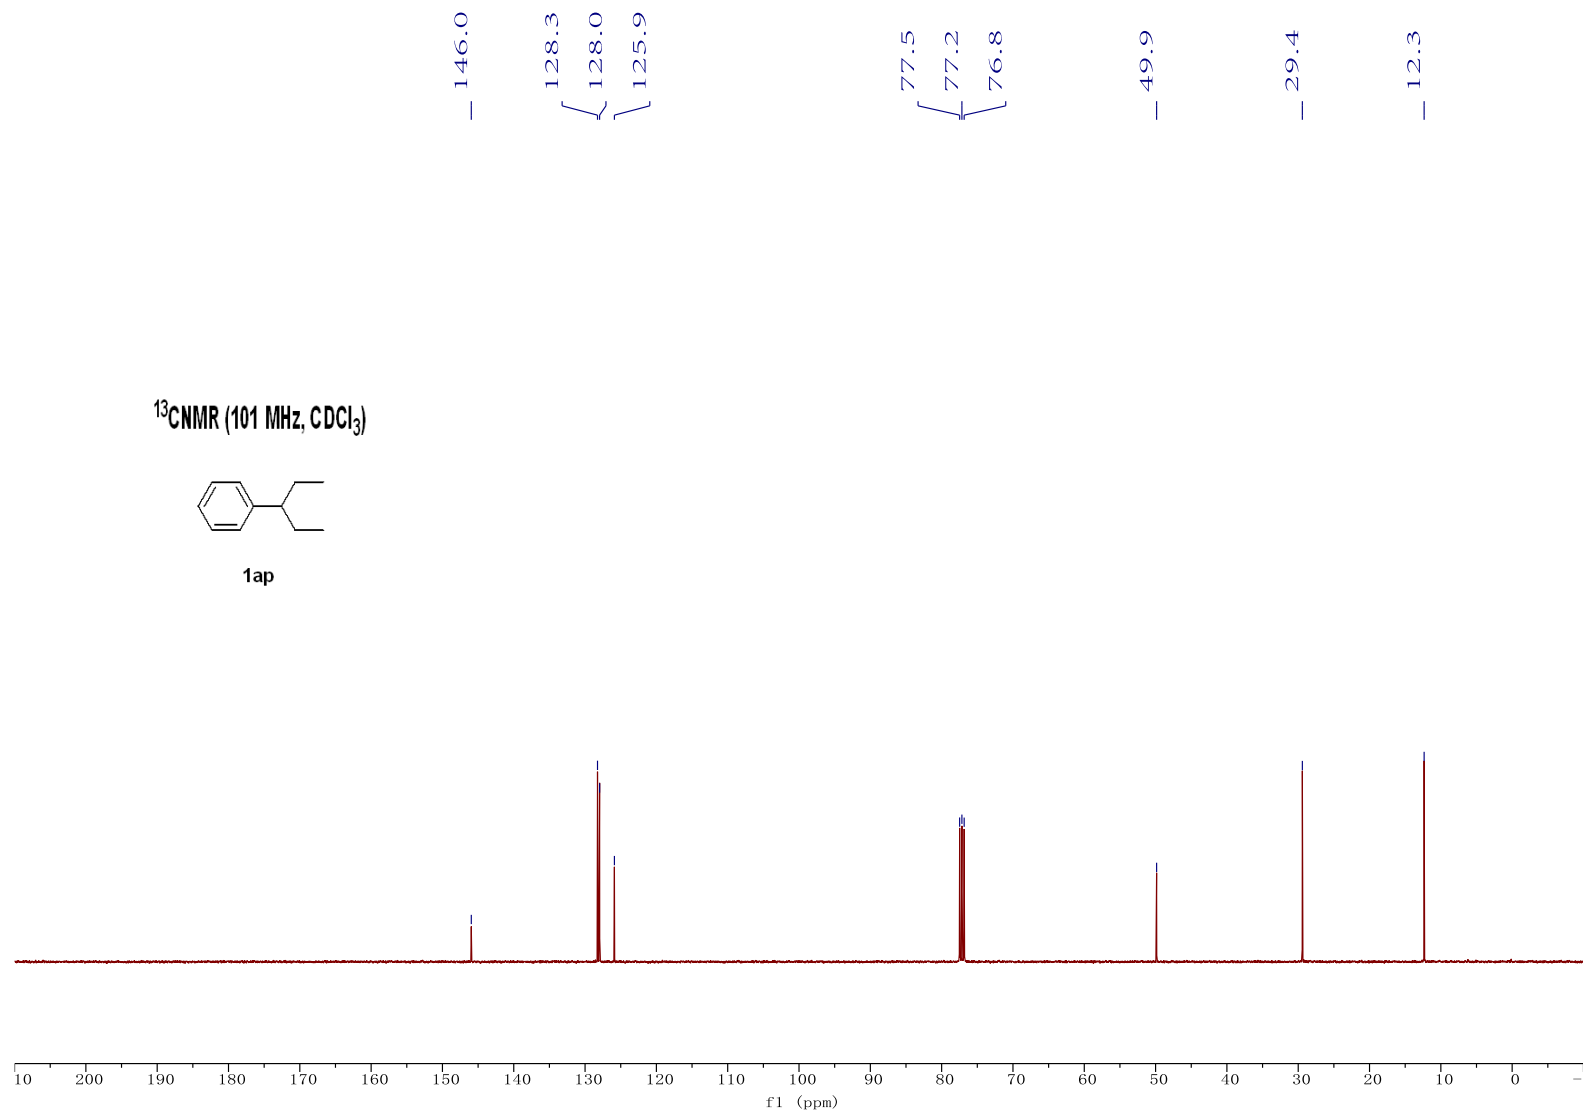

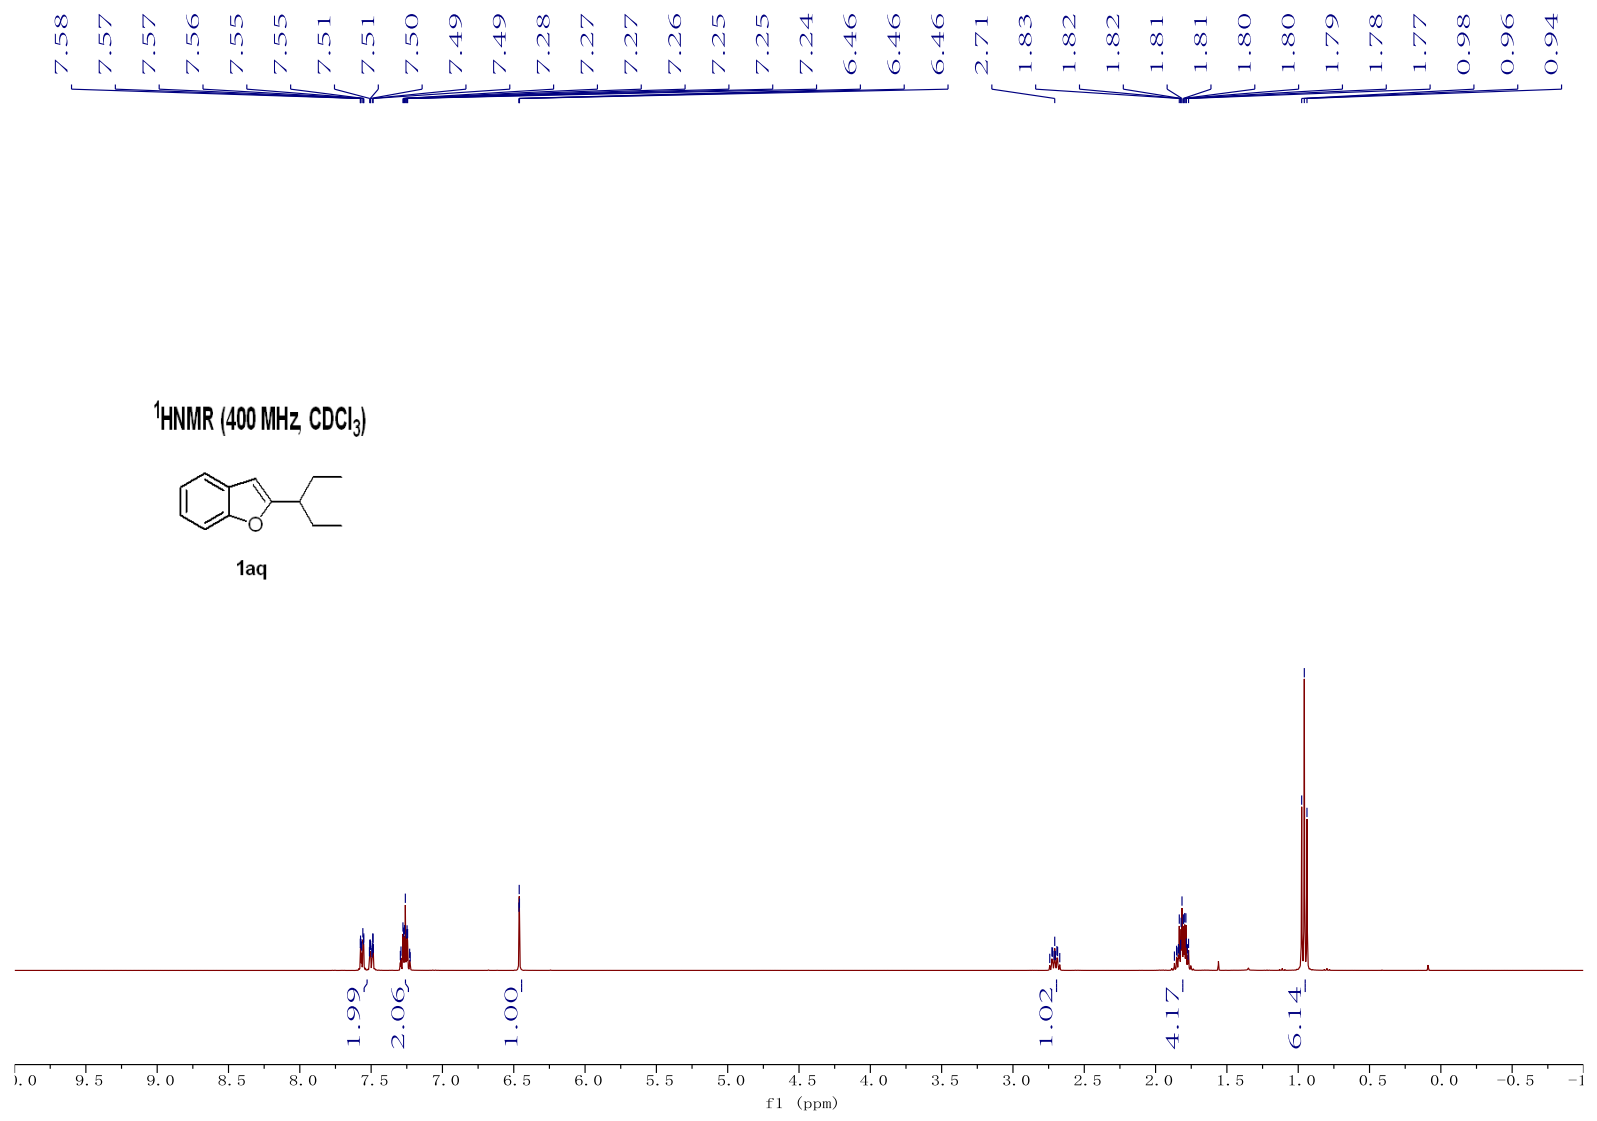

<sup>13</sup>CNMR (101 MHz, CDCl<sub>3</sub>)

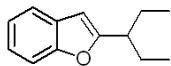

1aq

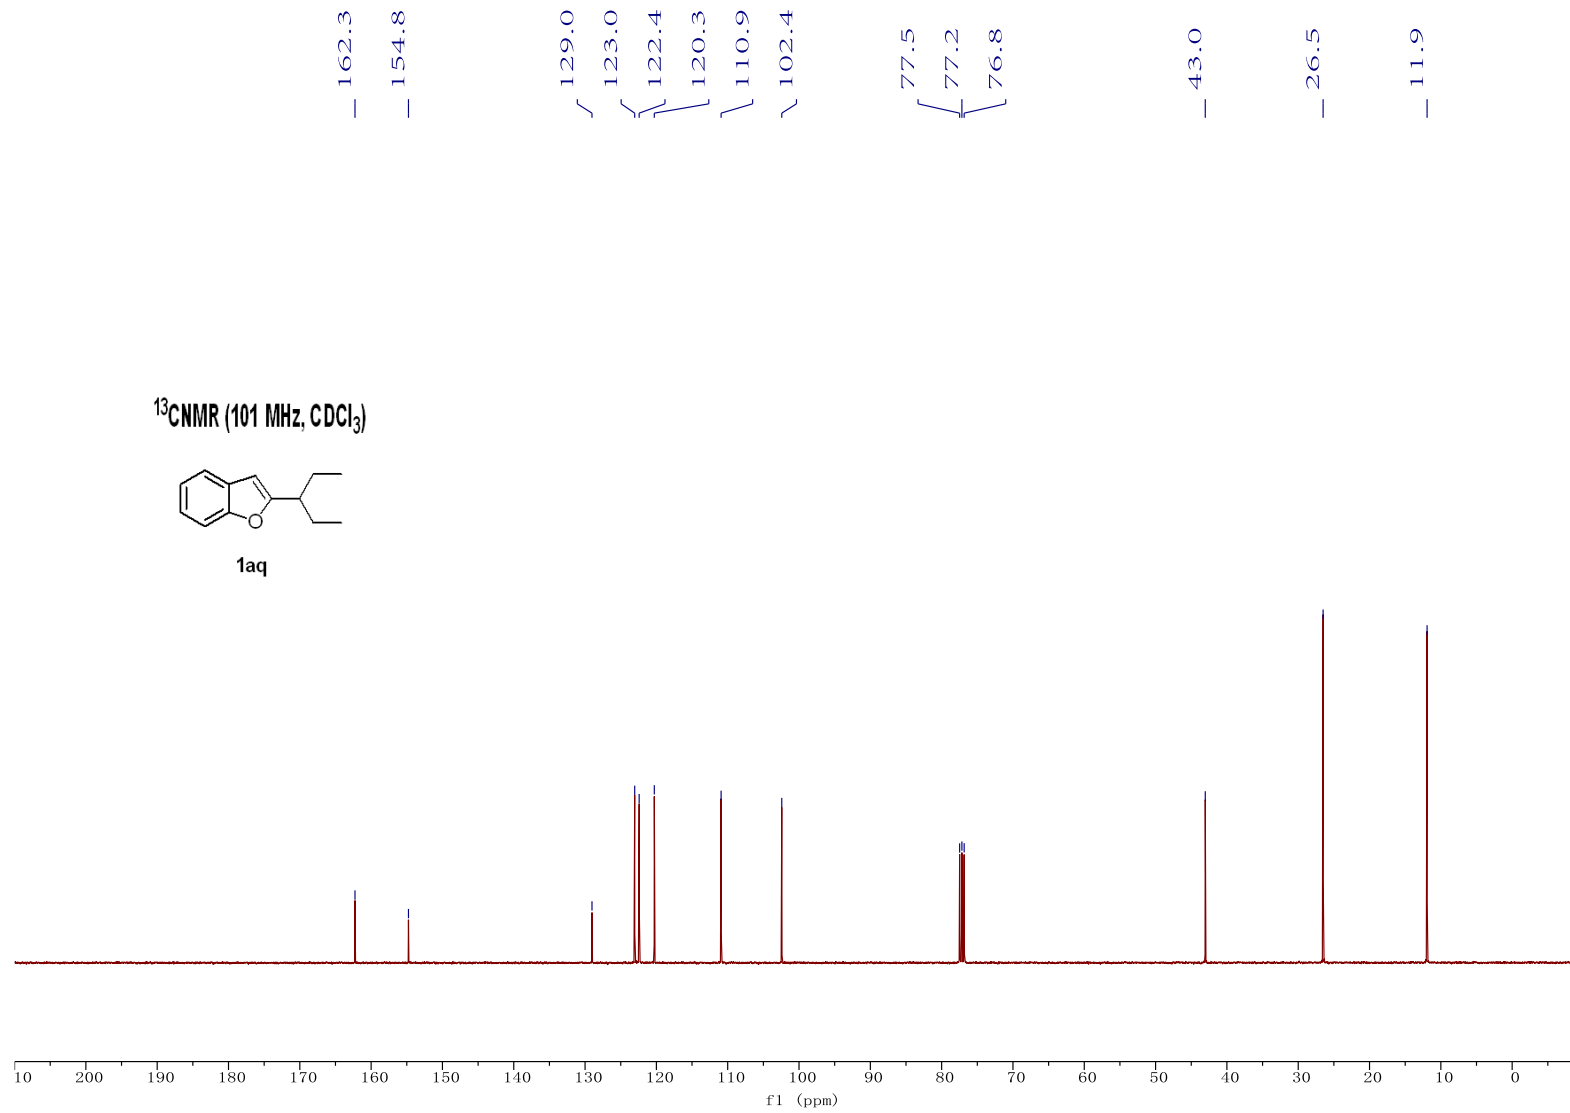

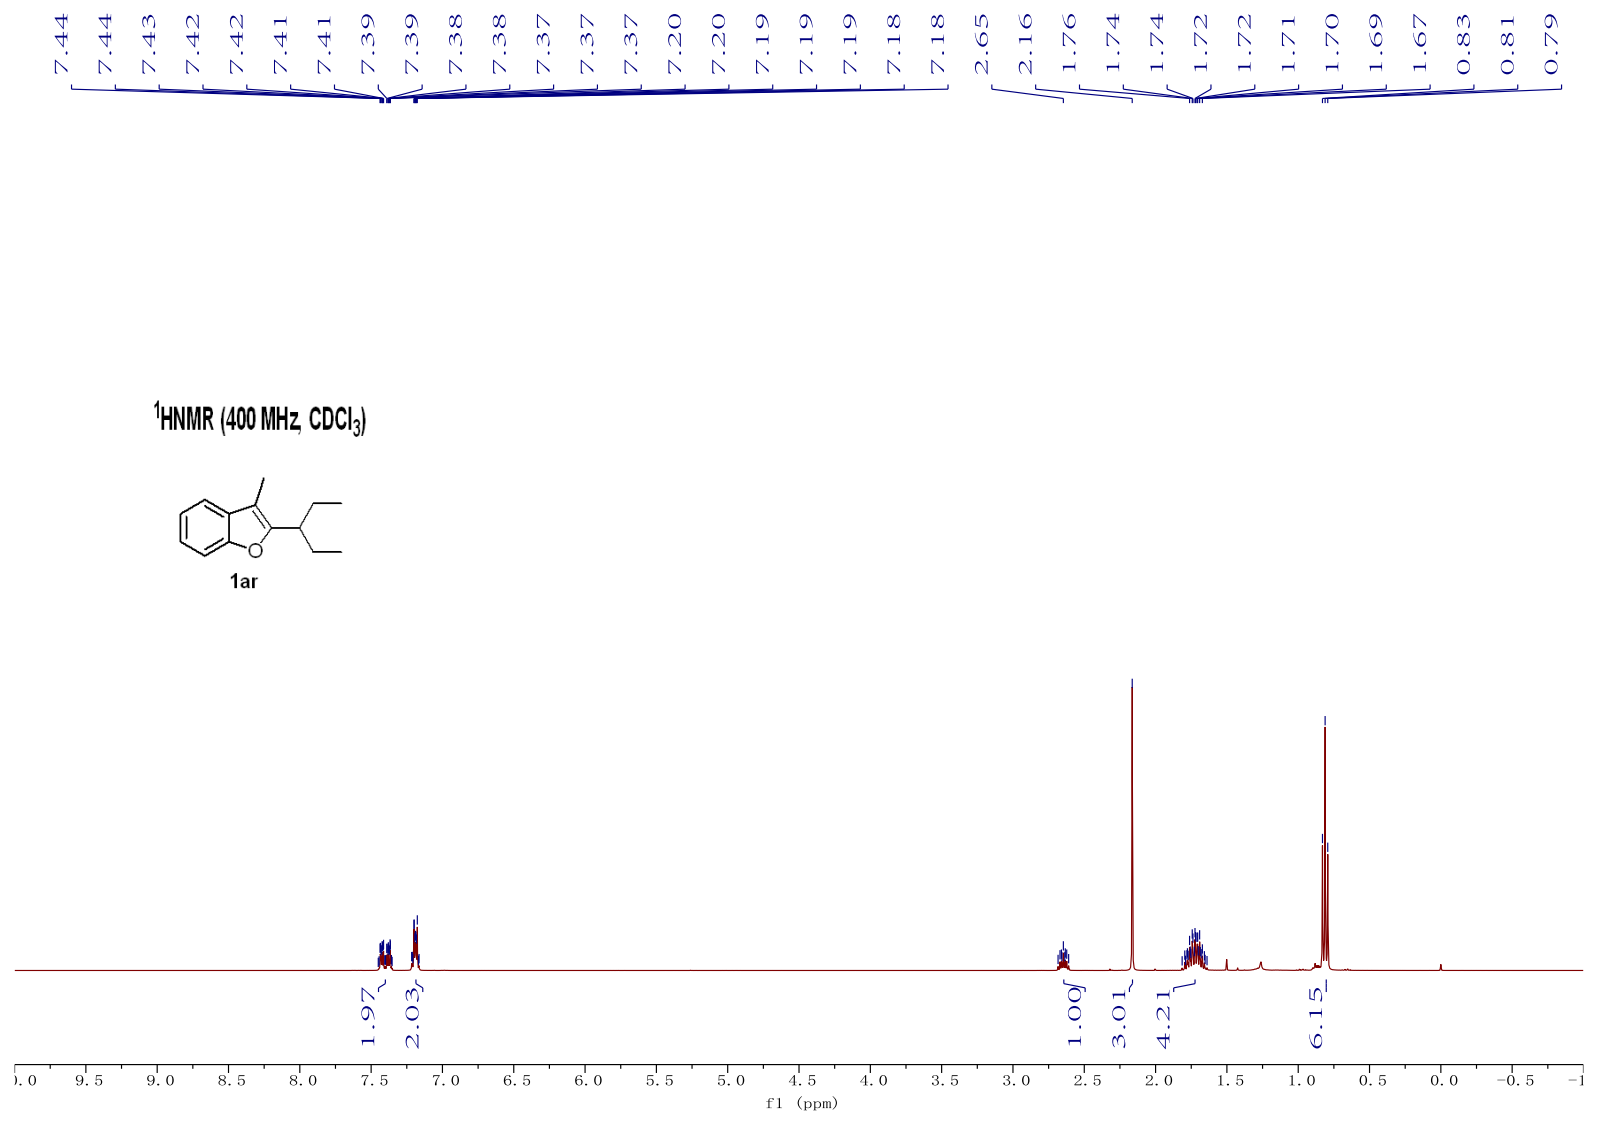

<sup>13</sup>CNMR (101 MHz, CDCl<sub>3</sub>)

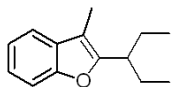

**1ar**

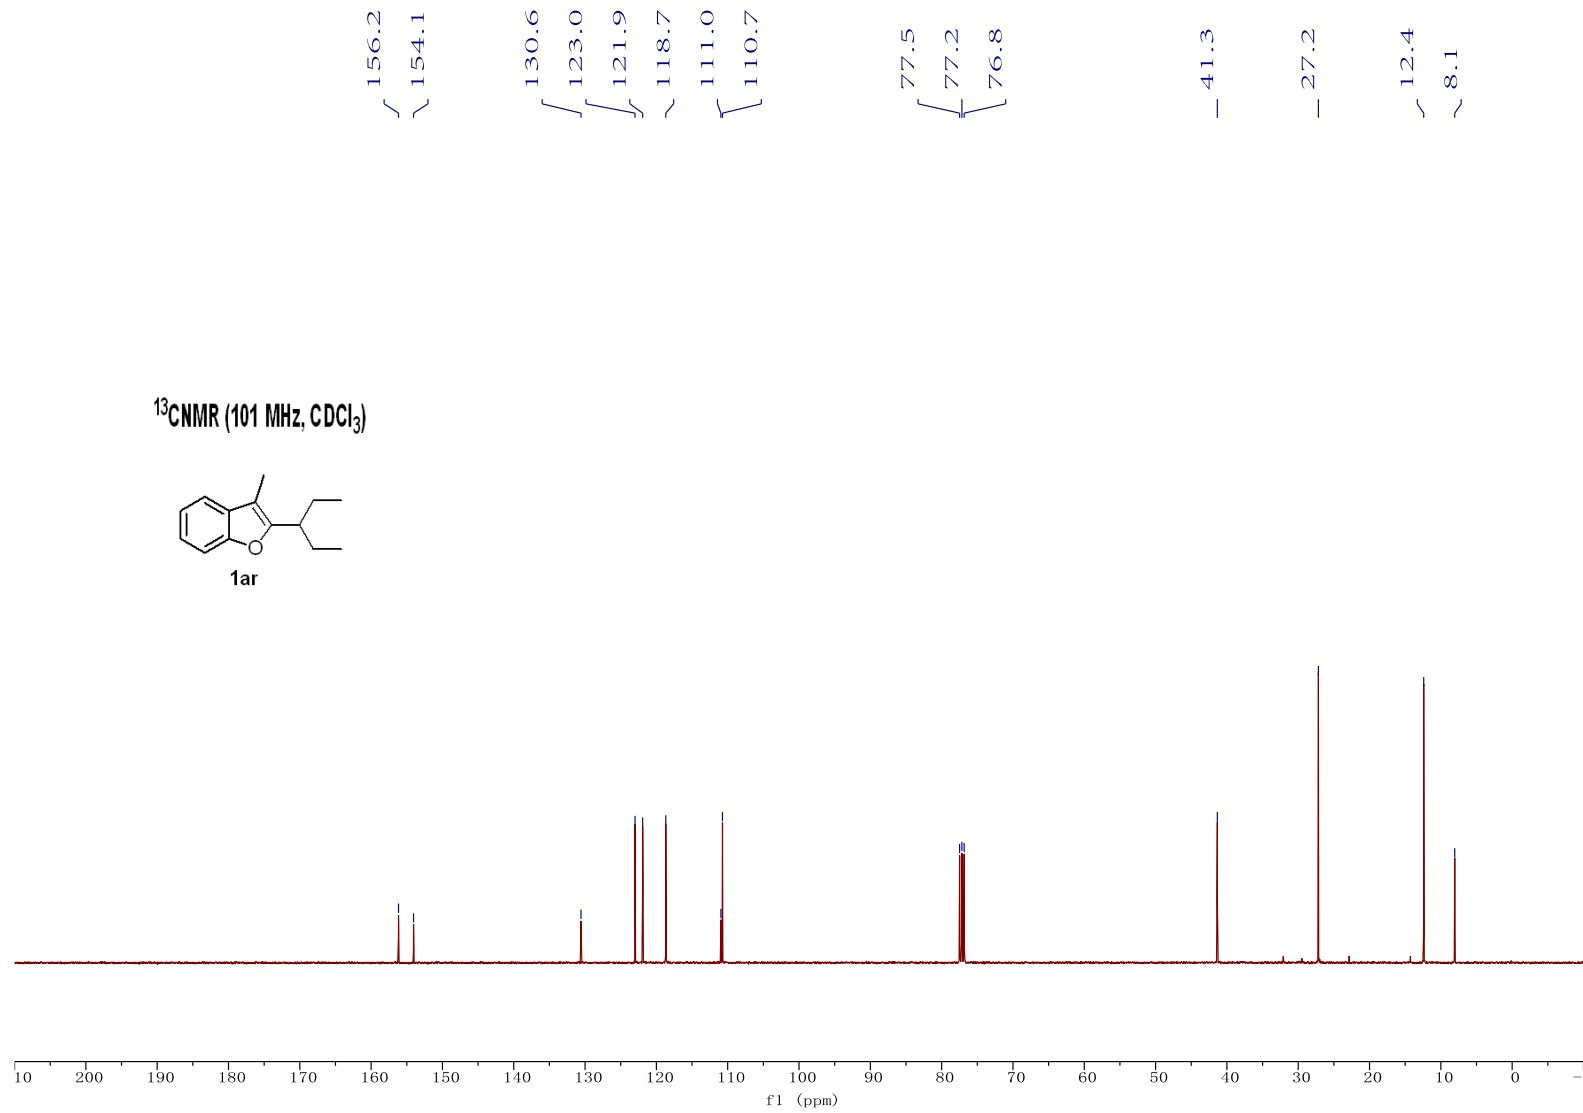

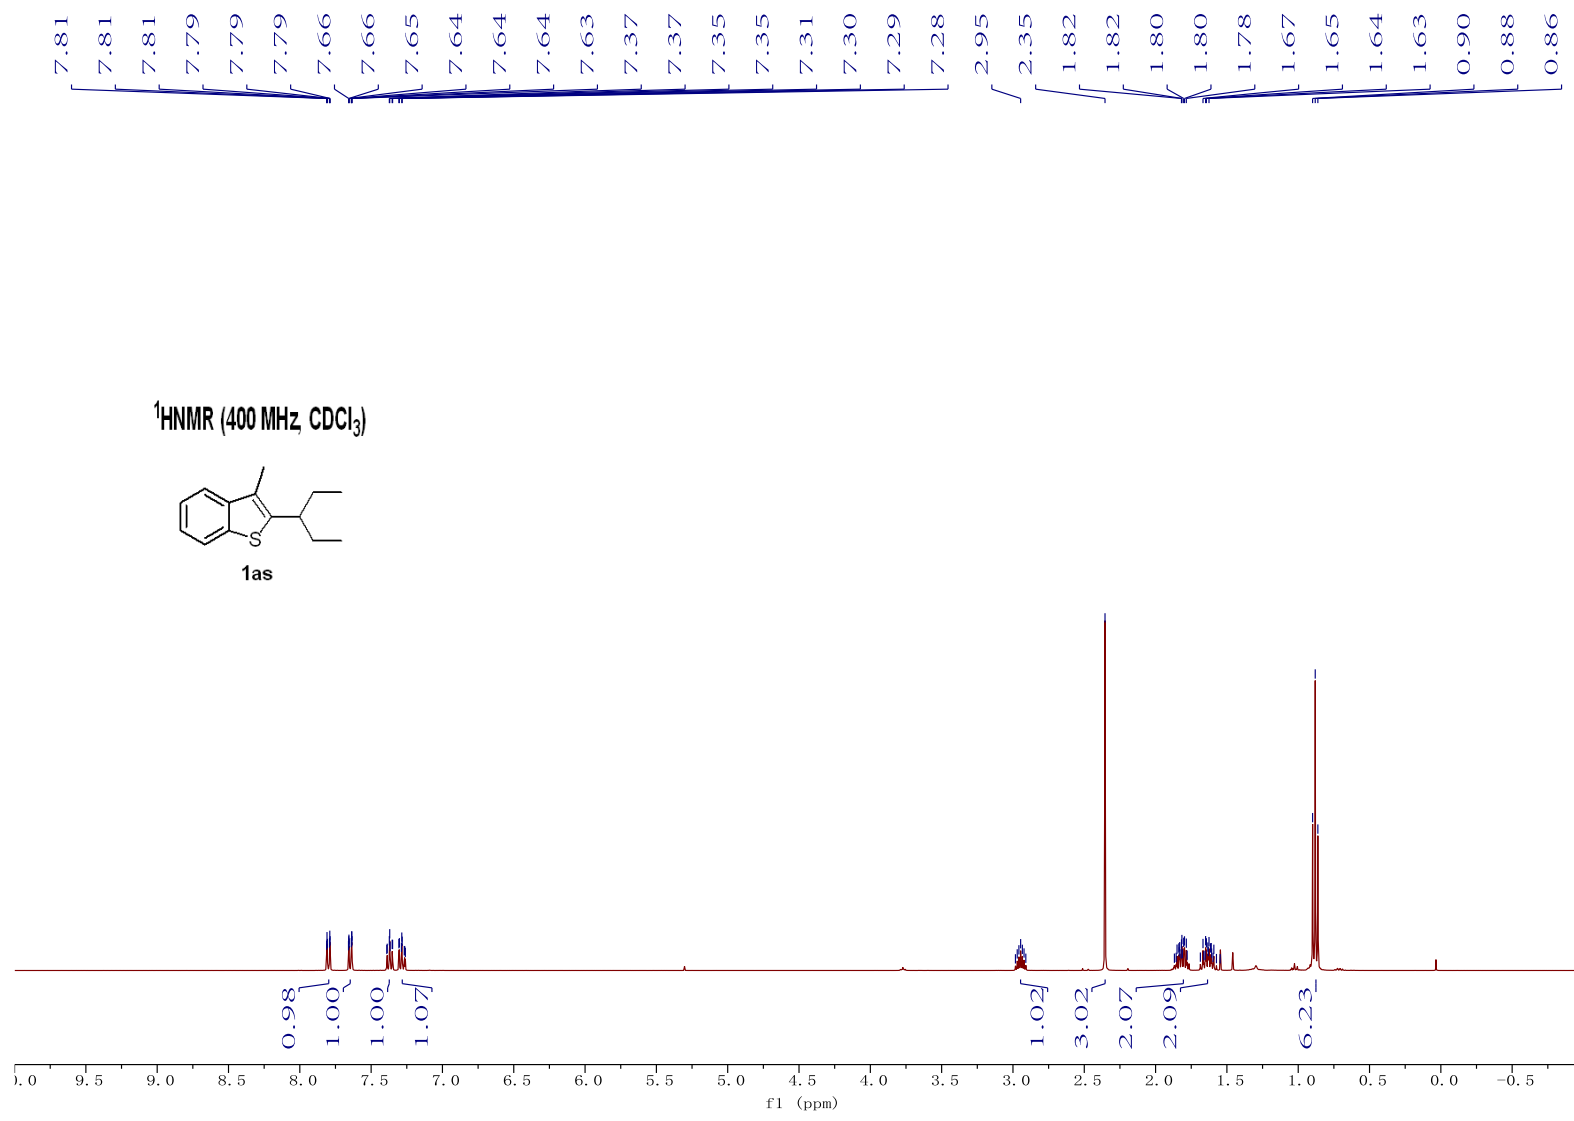

<sup>13</sup>CNMR (101 MHz, CDCl<sub>3</sub>)

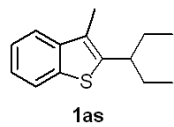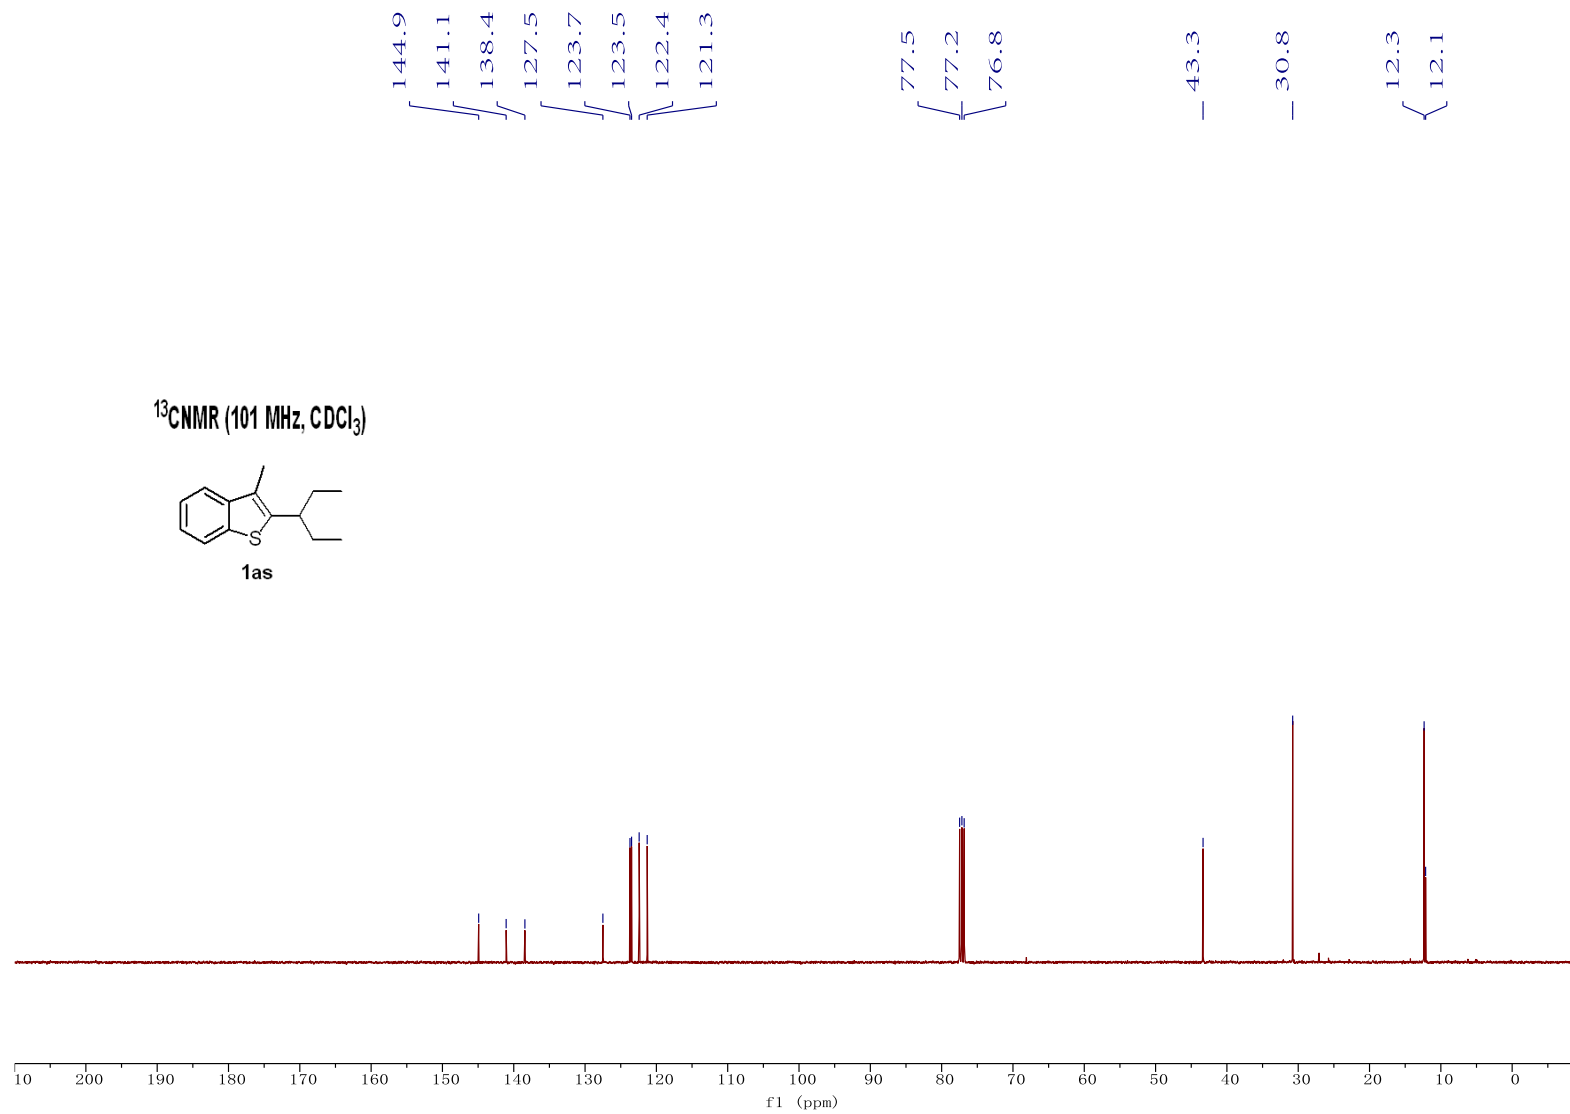



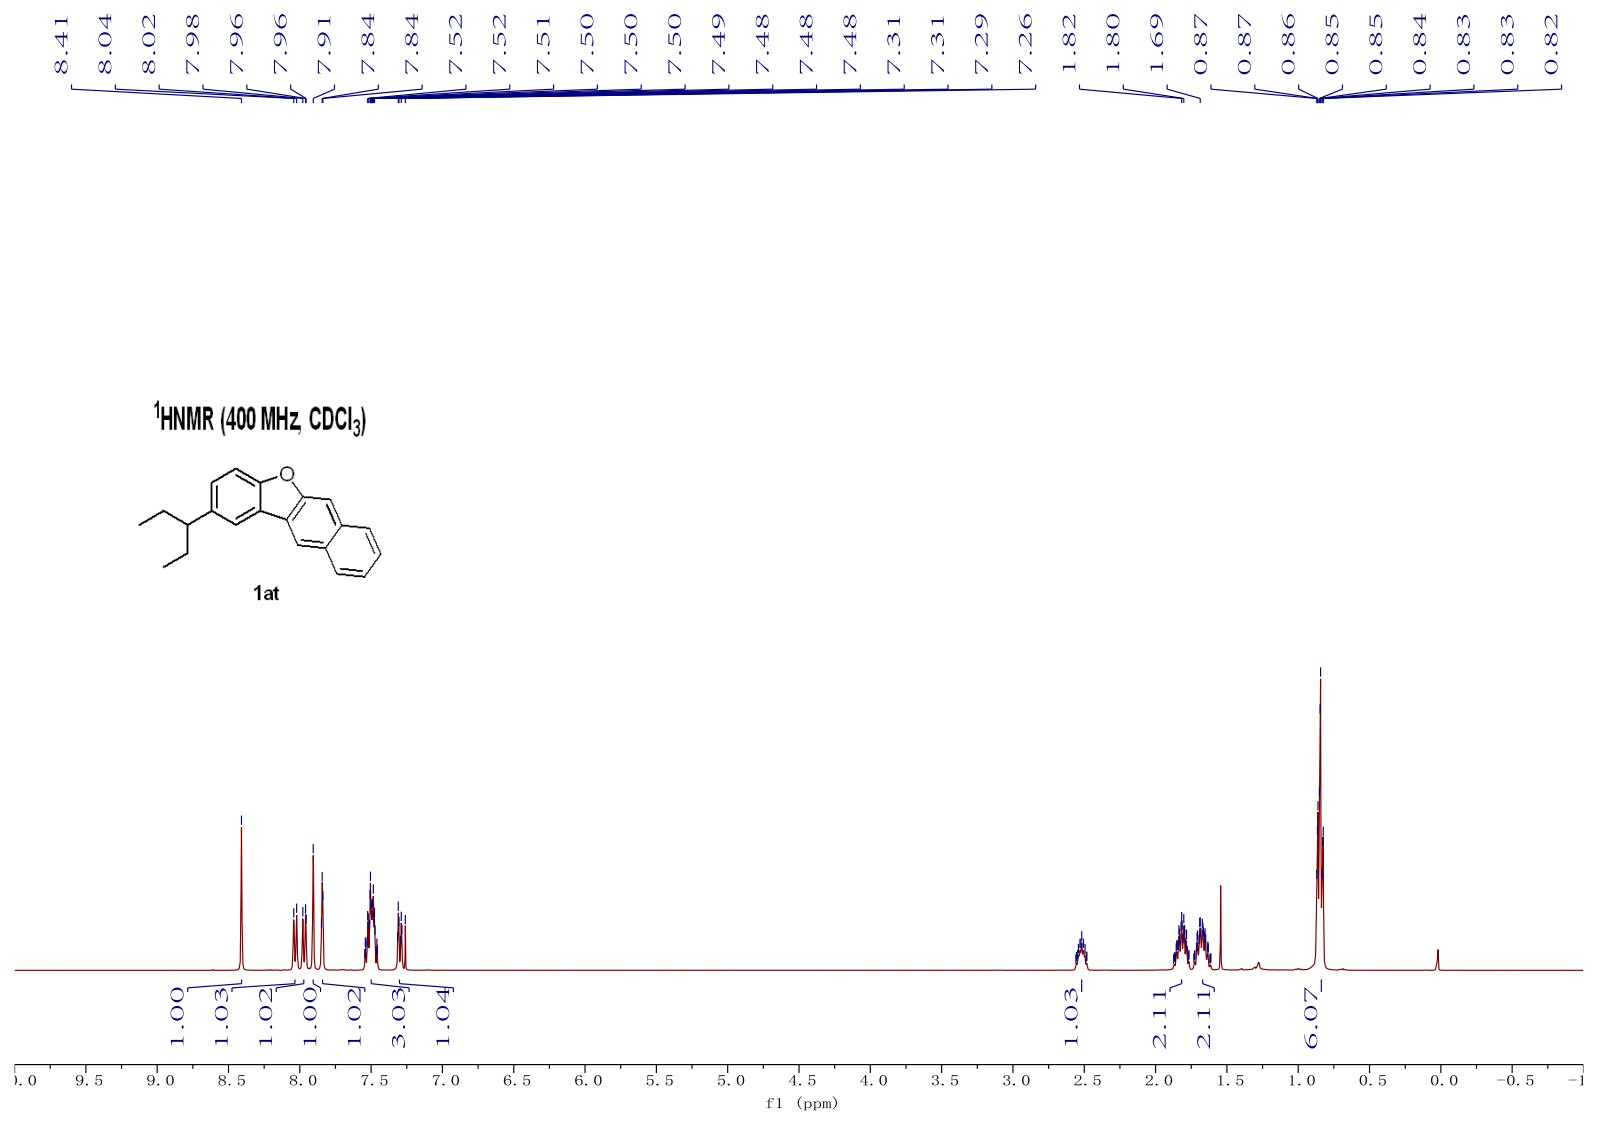

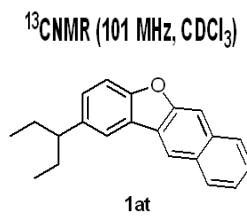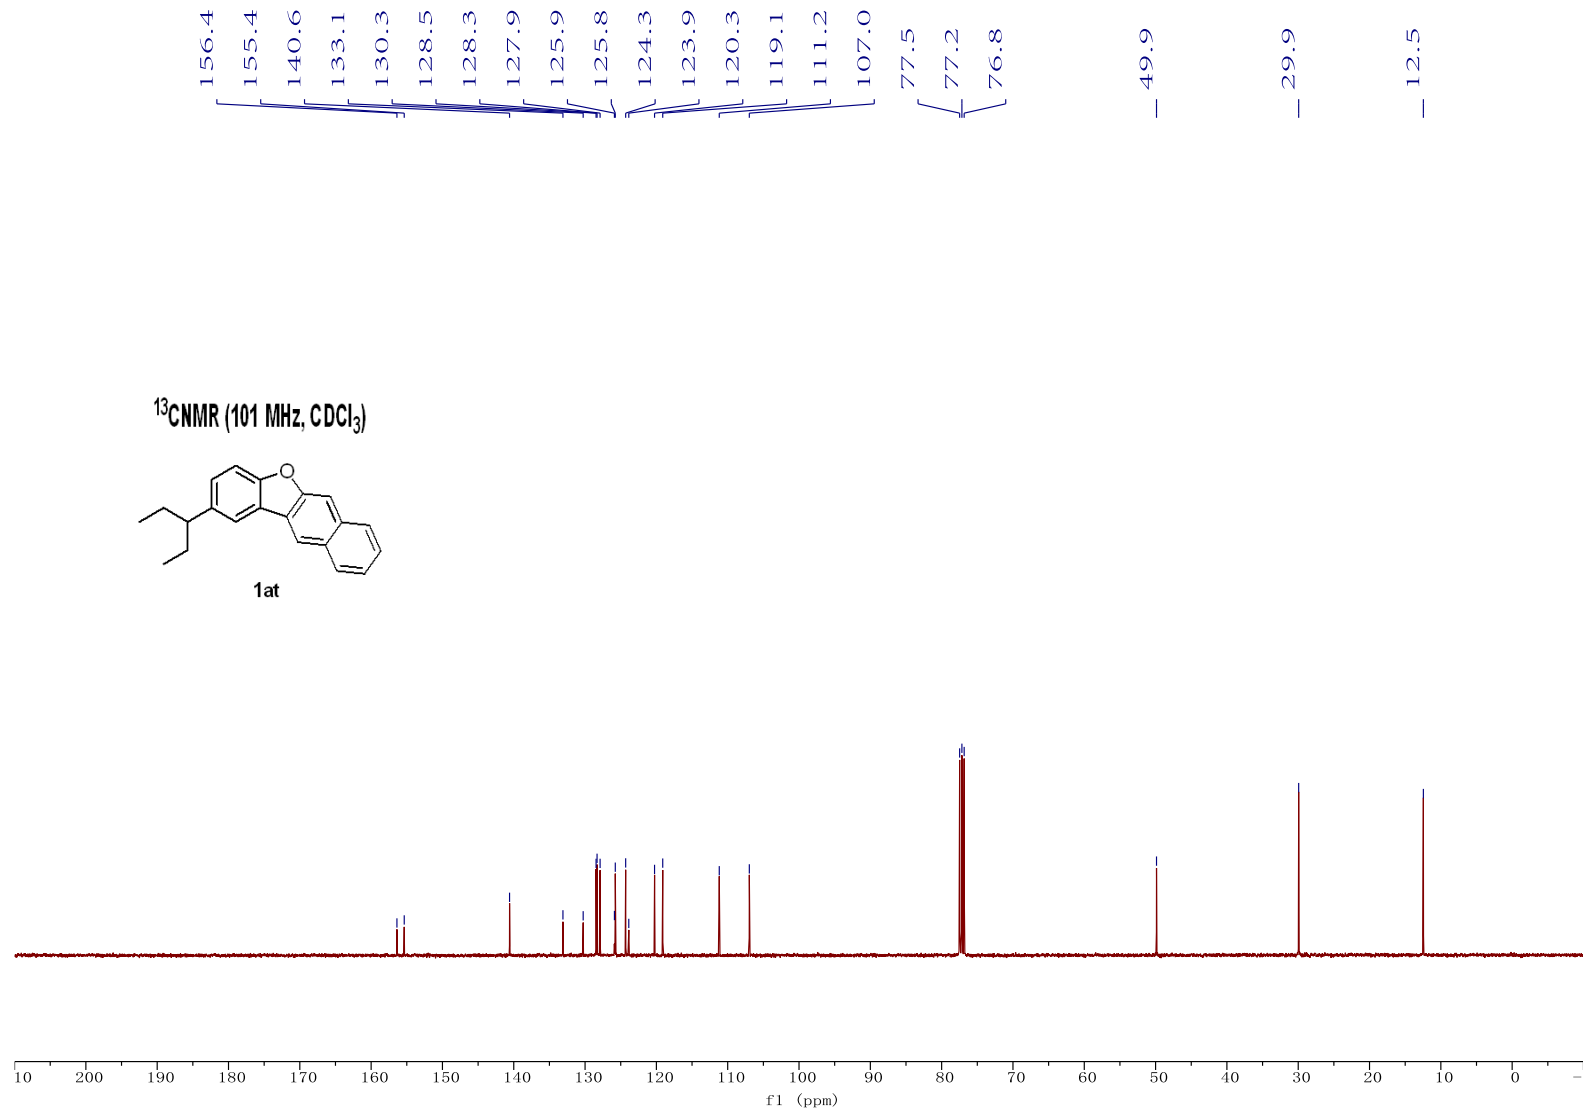

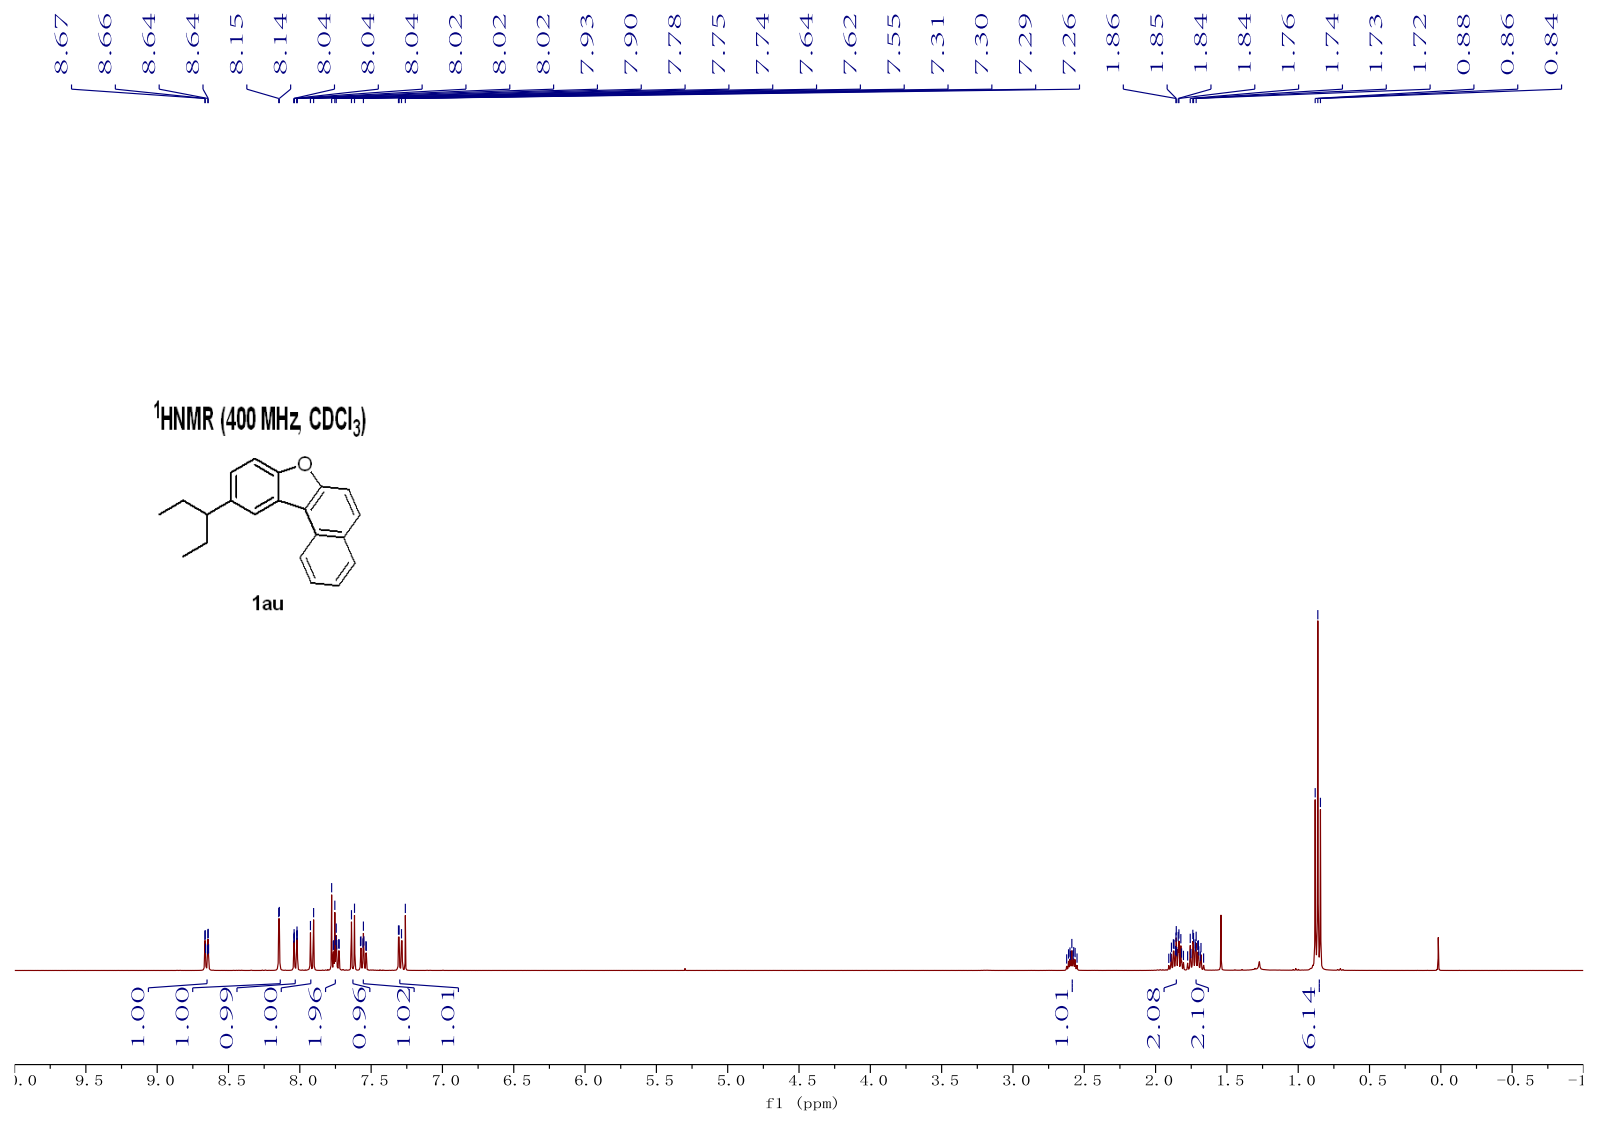

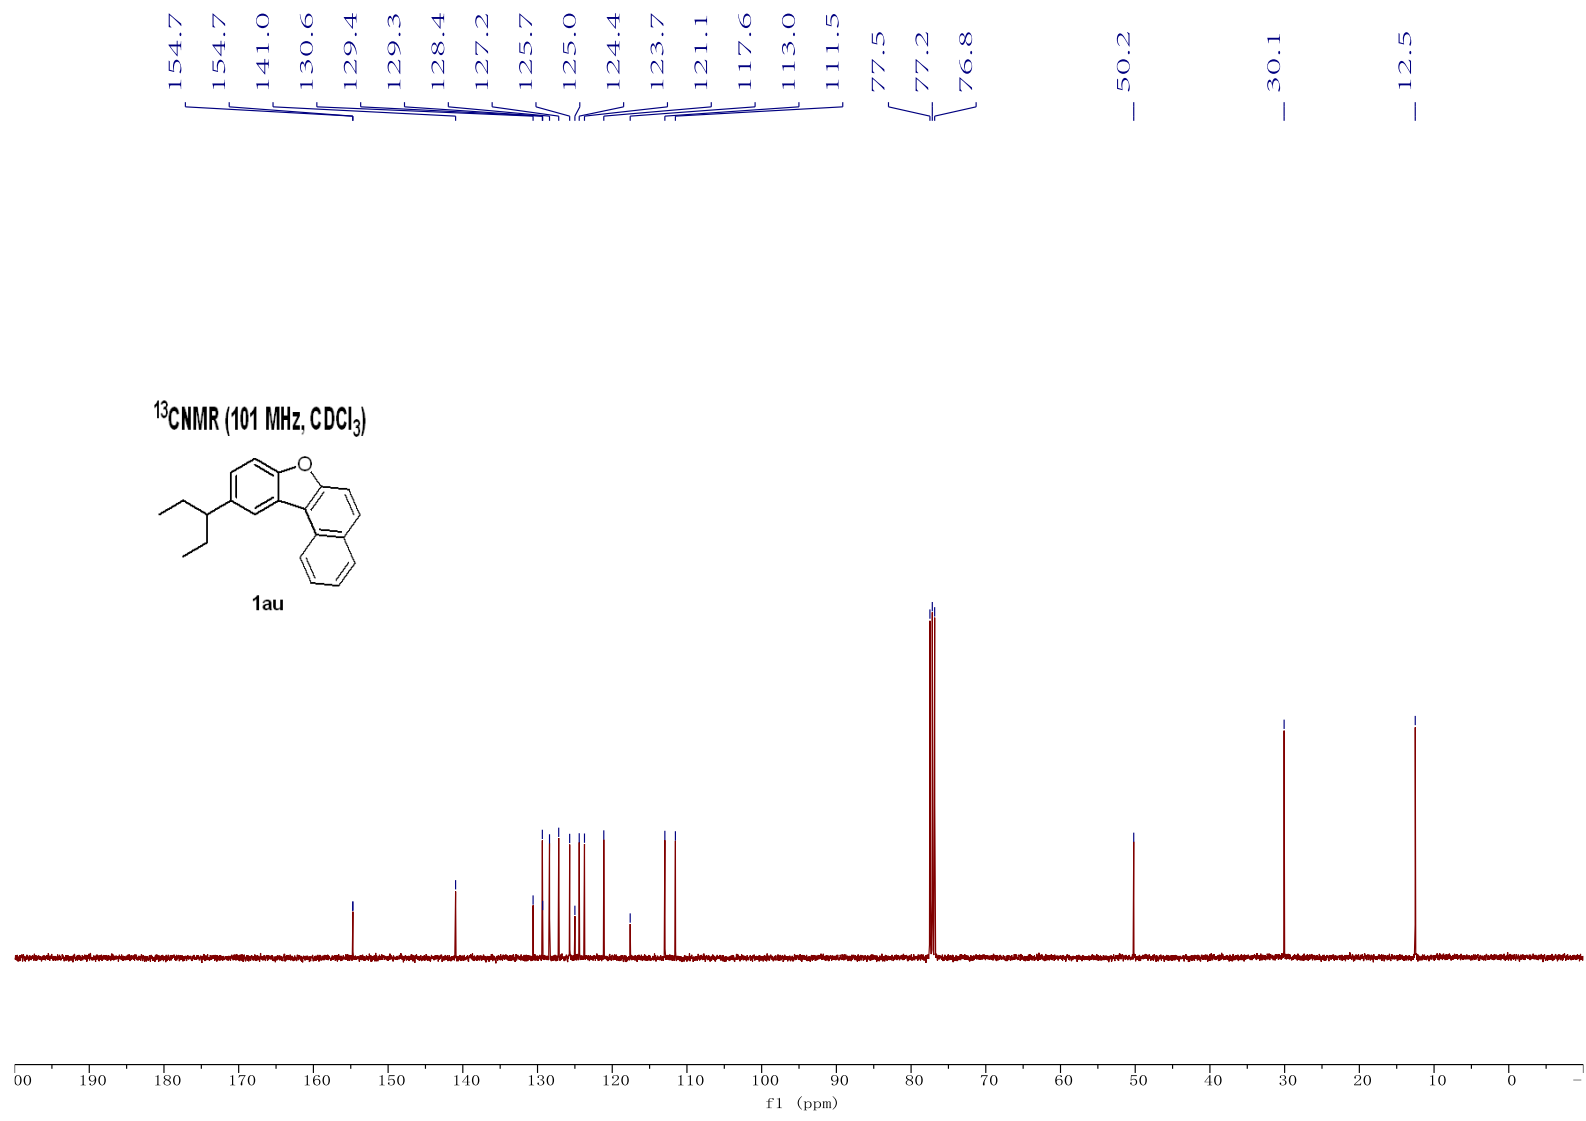

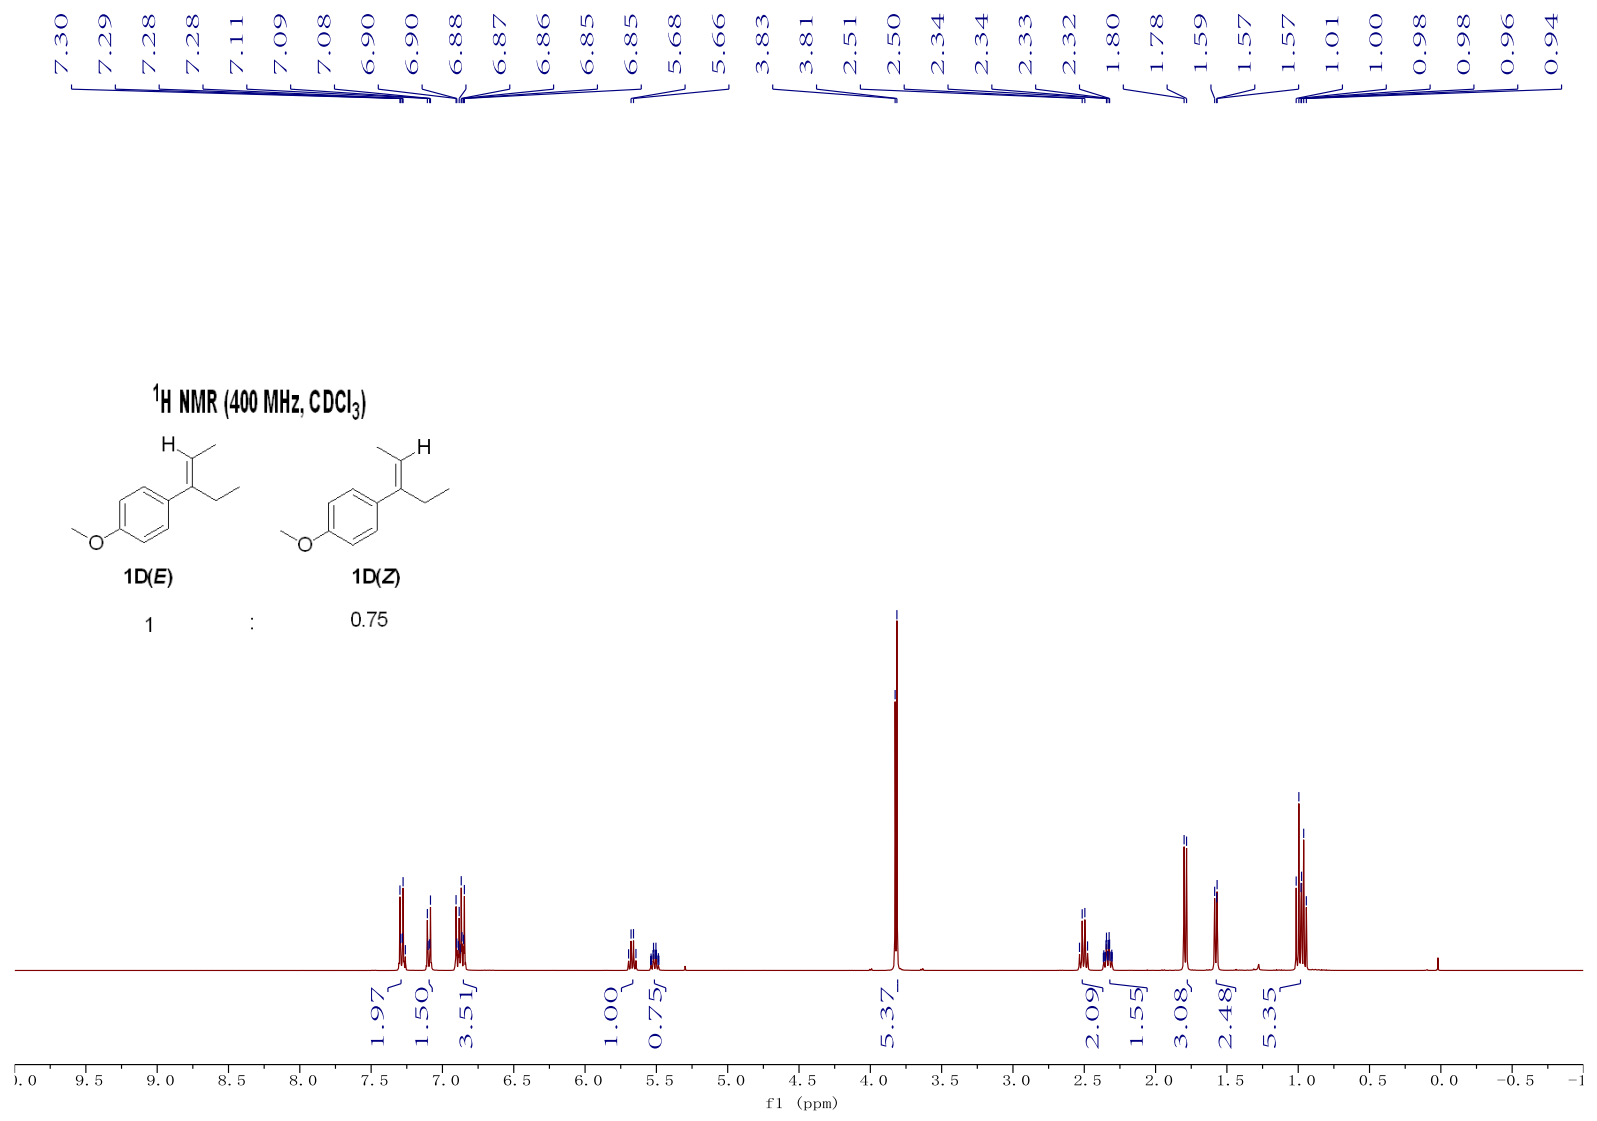

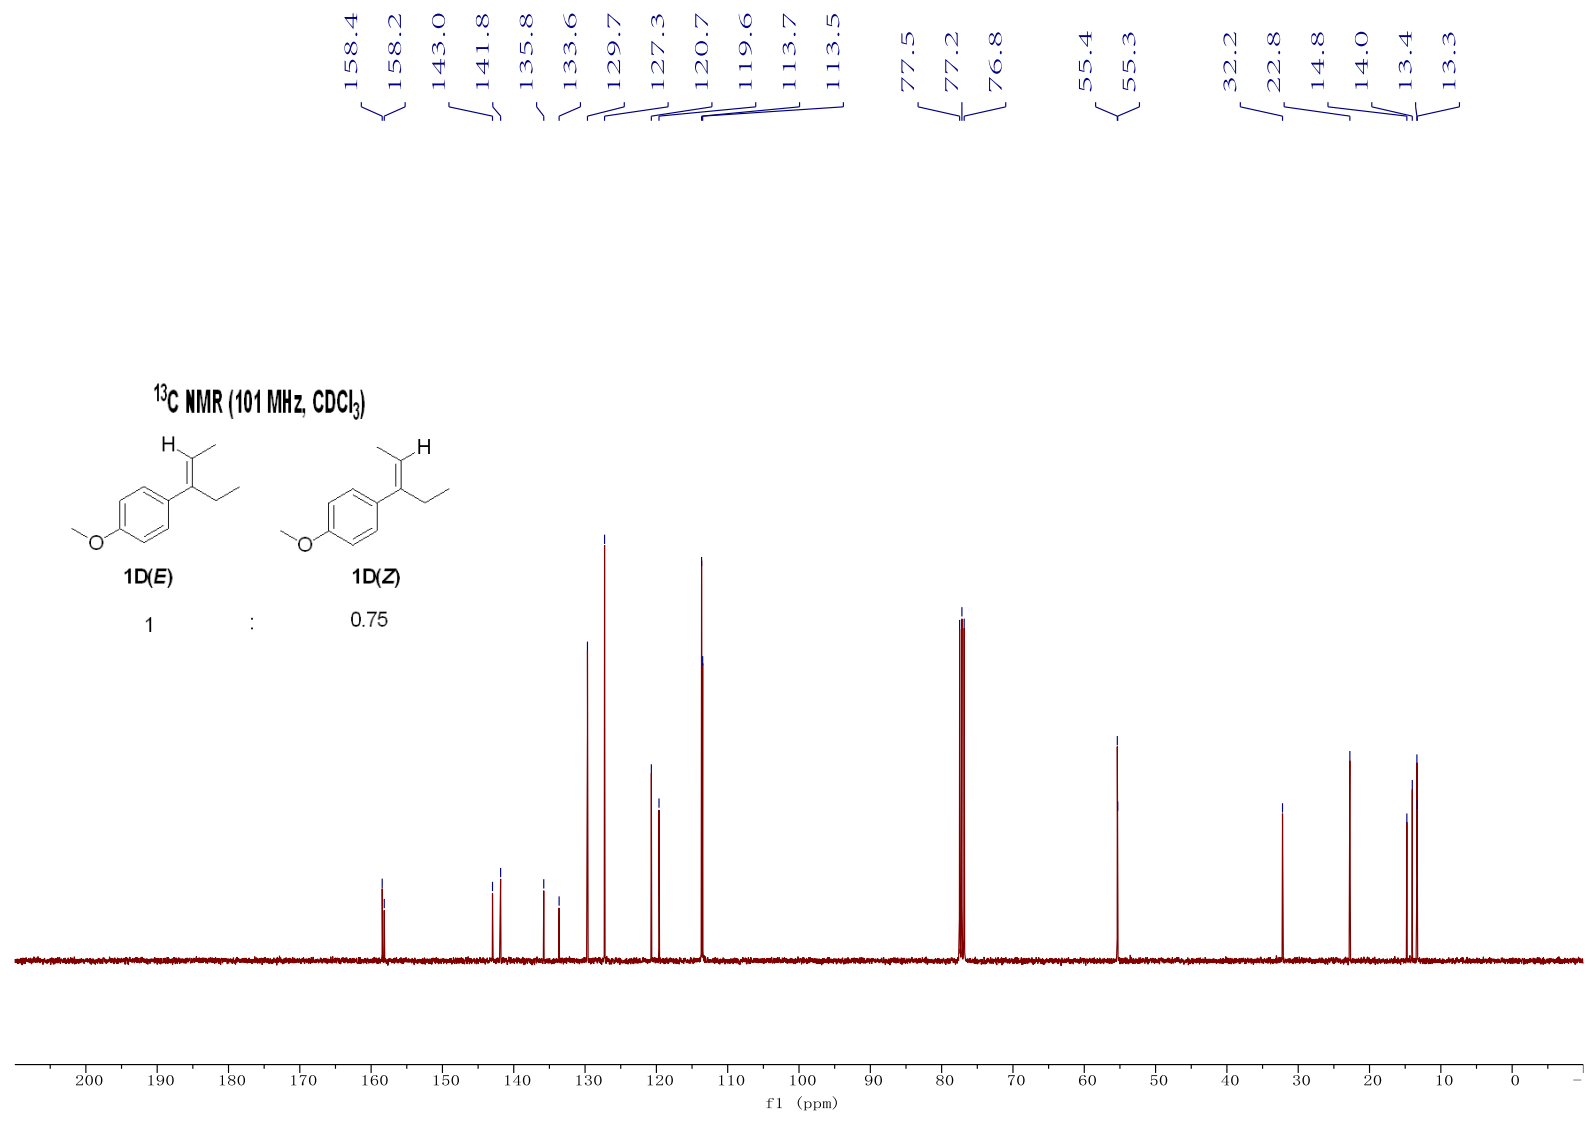

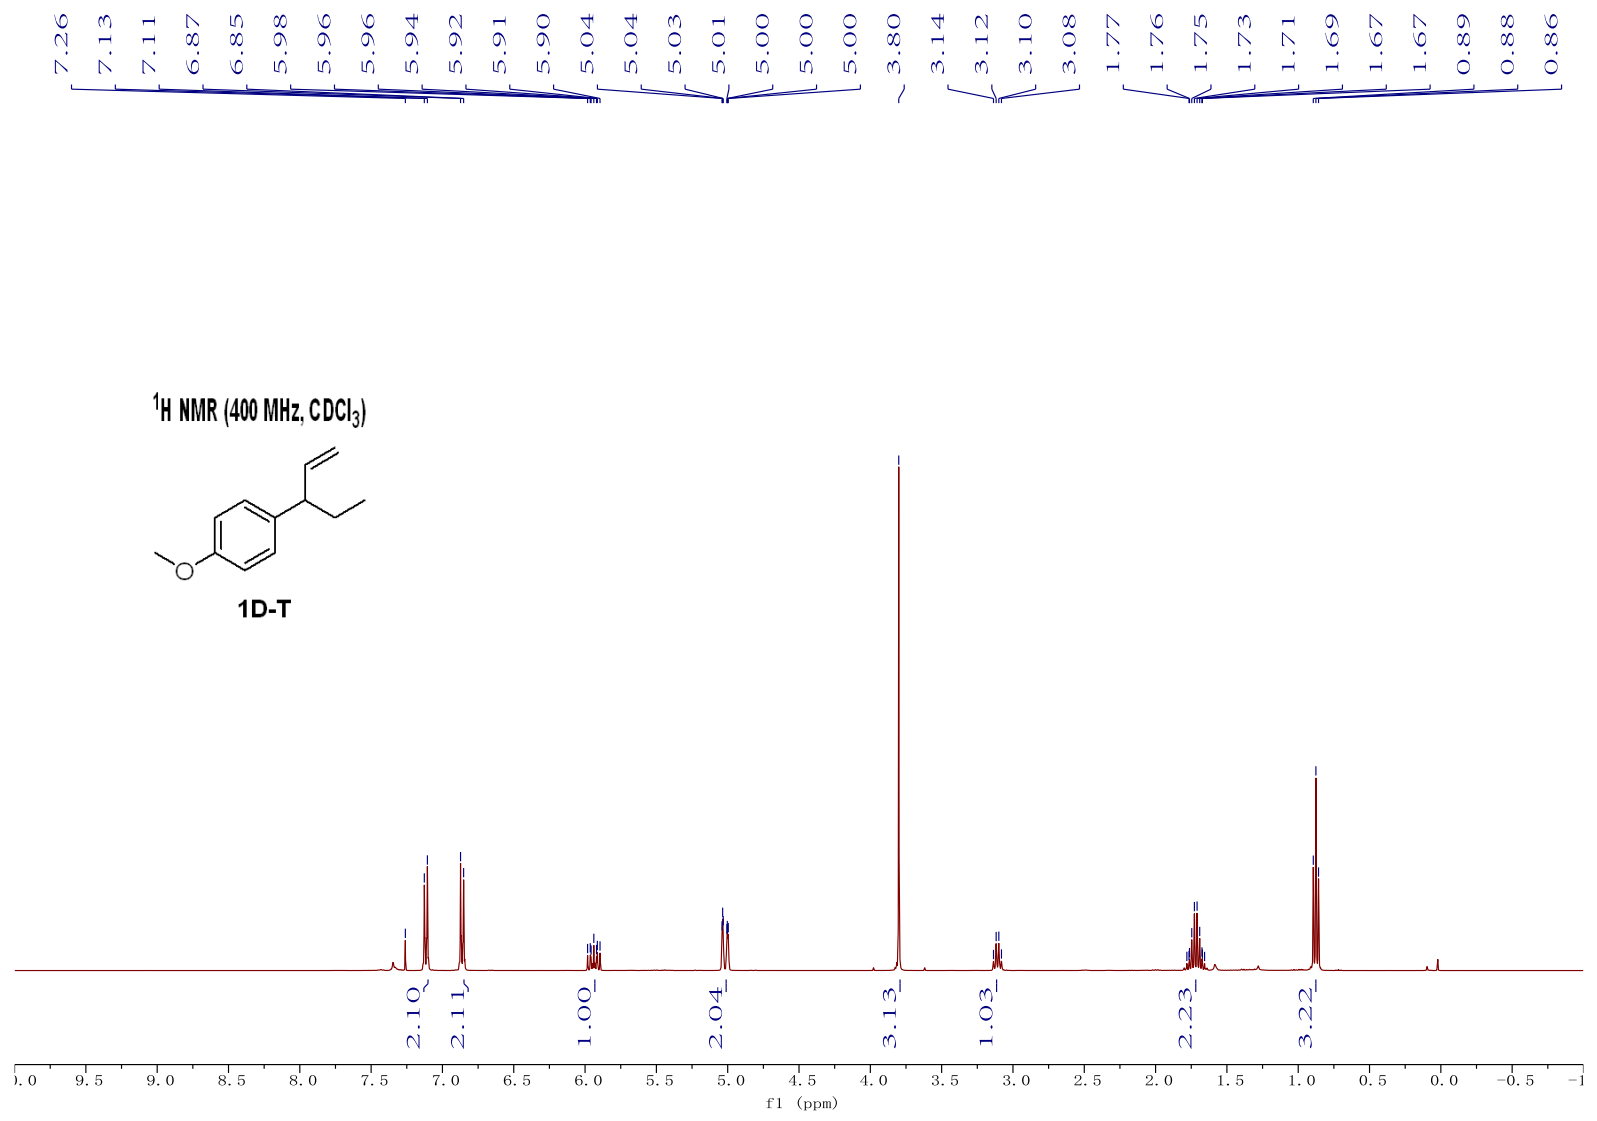

<sup>13</sup>C NMR (101 MHz, CDCl<sub>3</sub>)

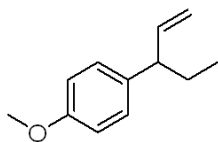

1D-T

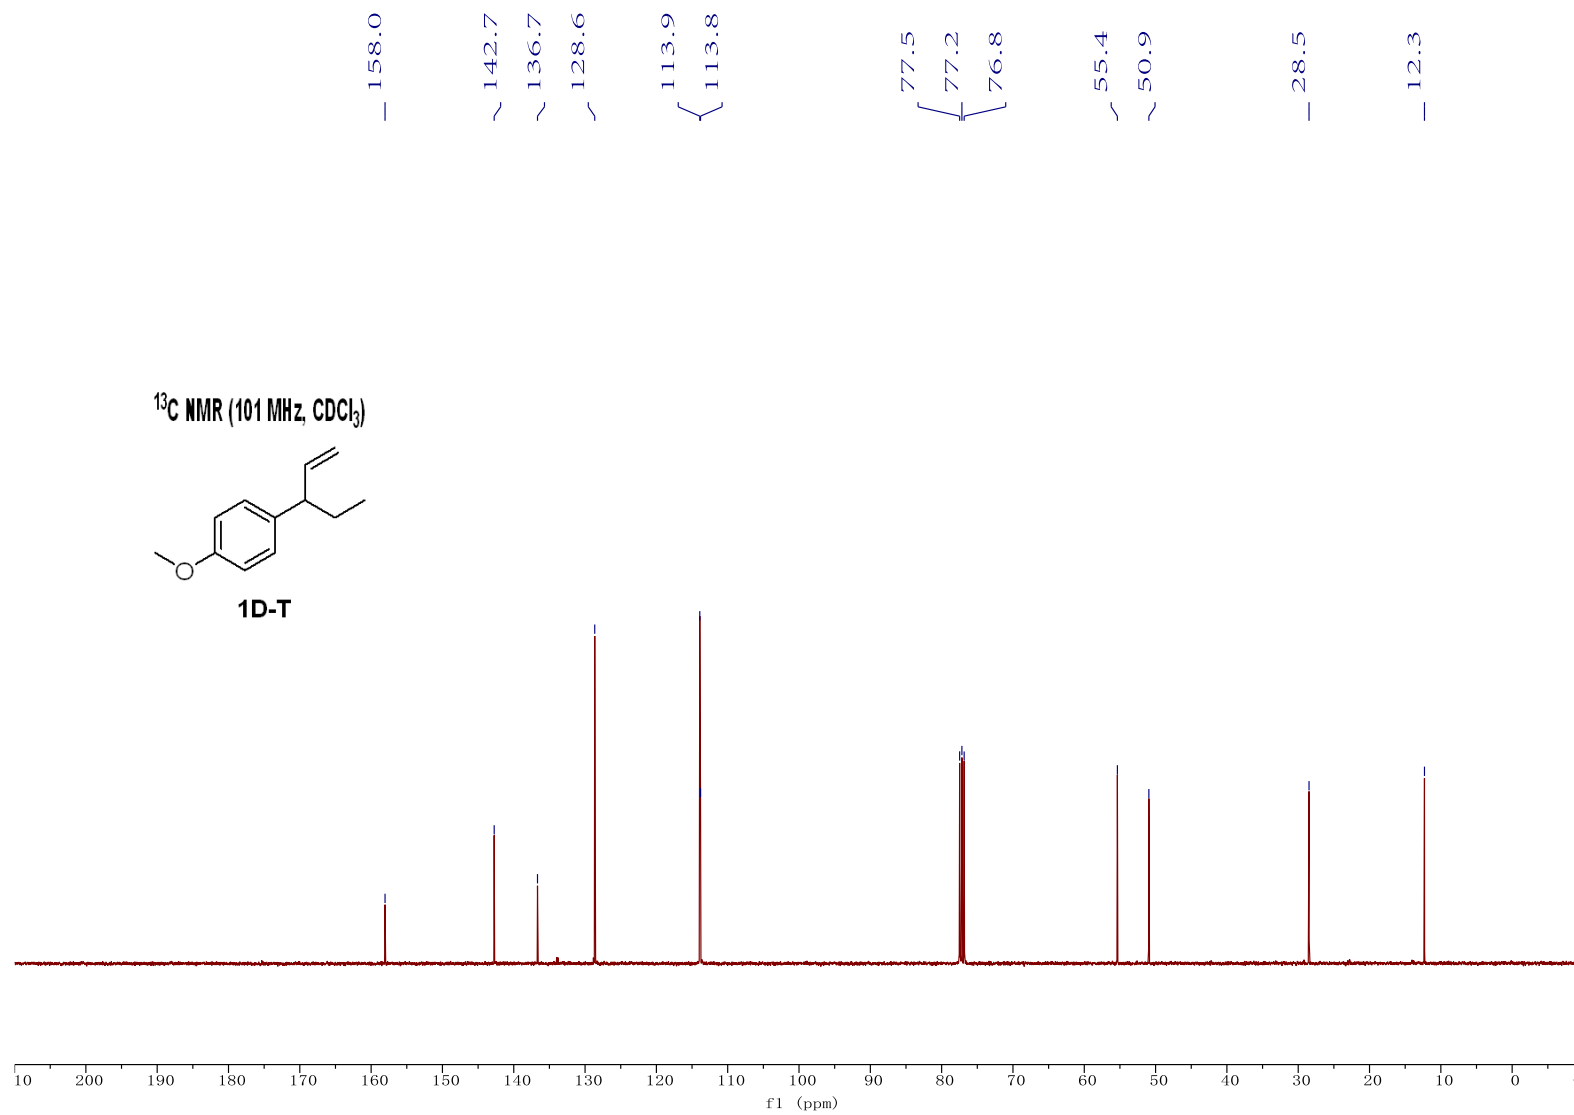



<sup>1</sup>H NMR (400 MHz, CDCl<sub>3</sub>)

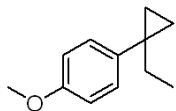

1D-C

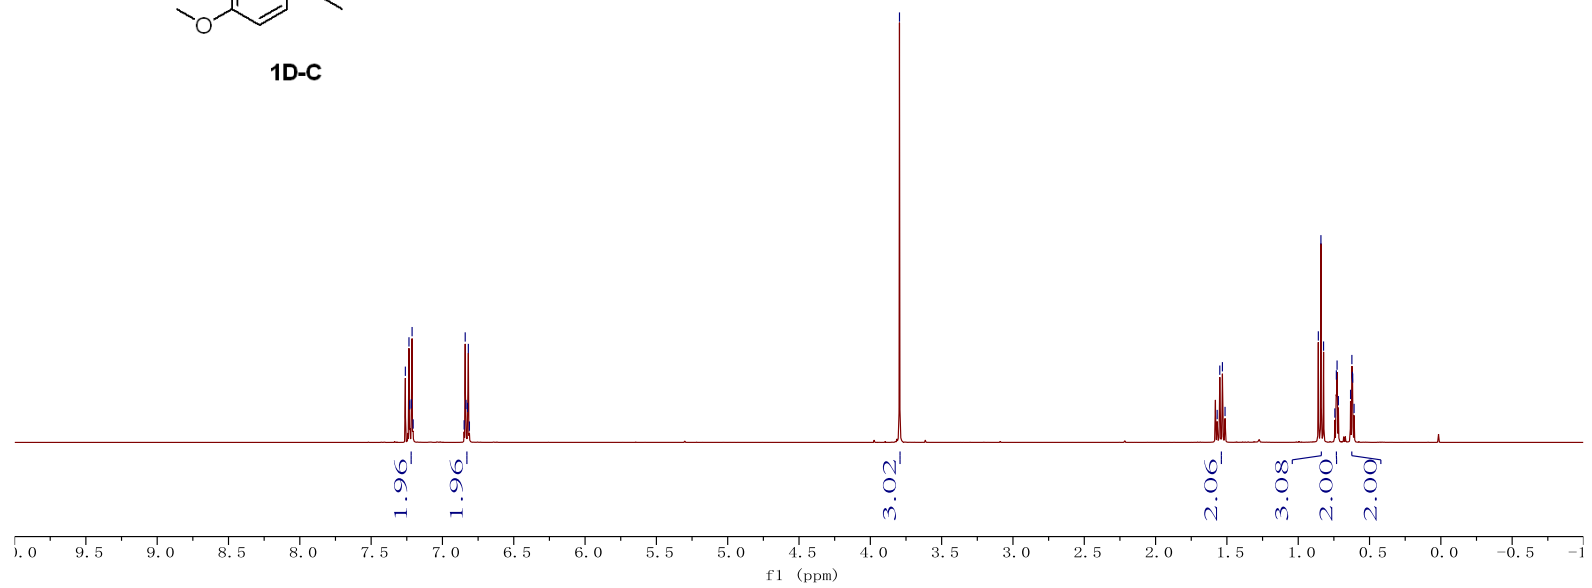

<sup>13</sup>C NMR (101 MHz, CDCl<sub>3</sub>)

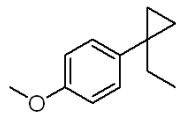

**1D-C**

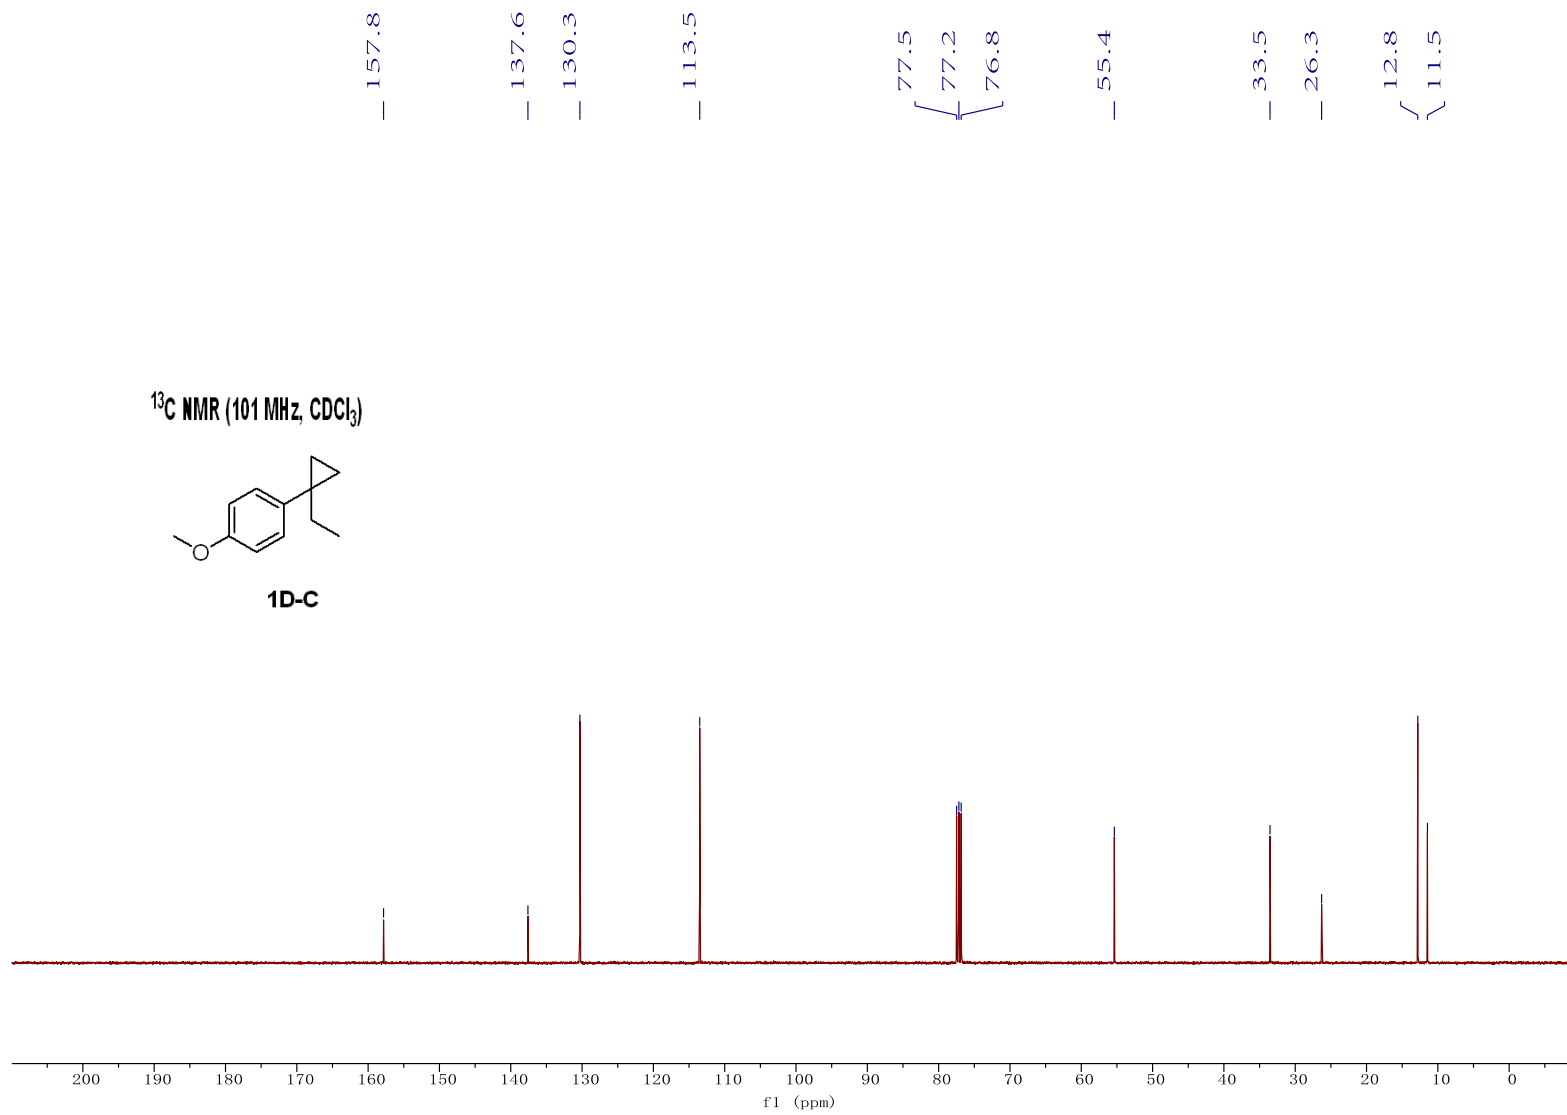

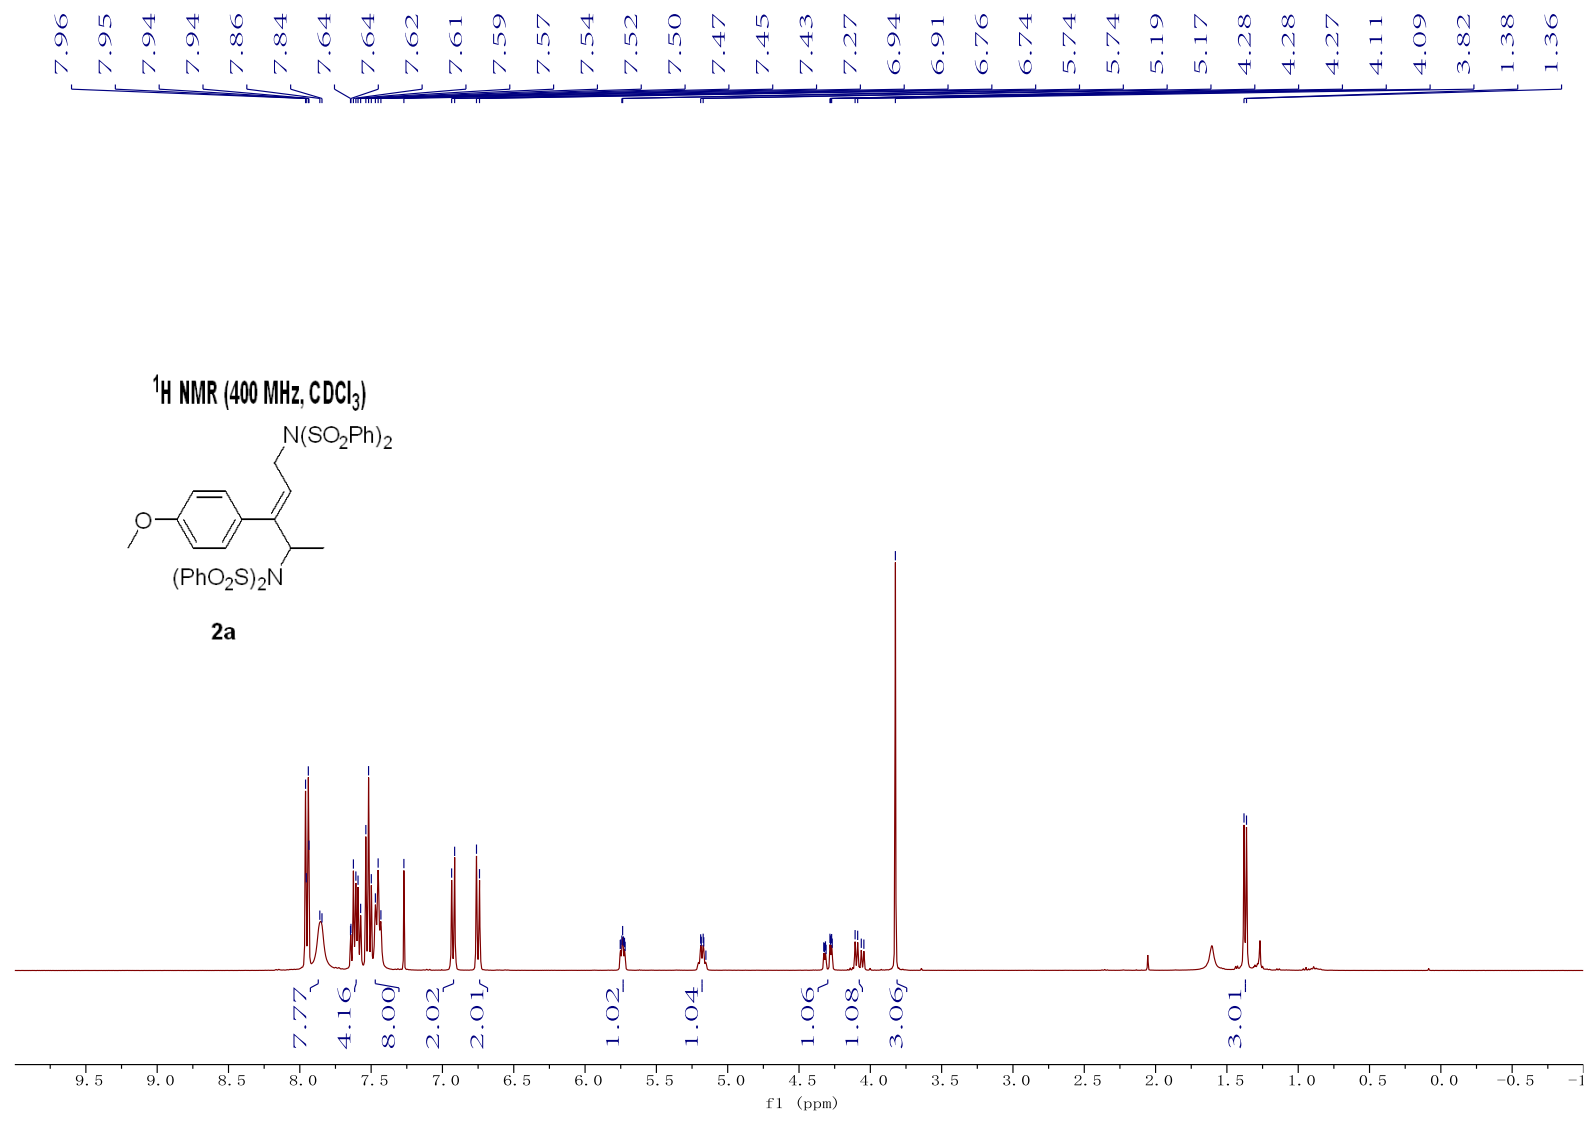

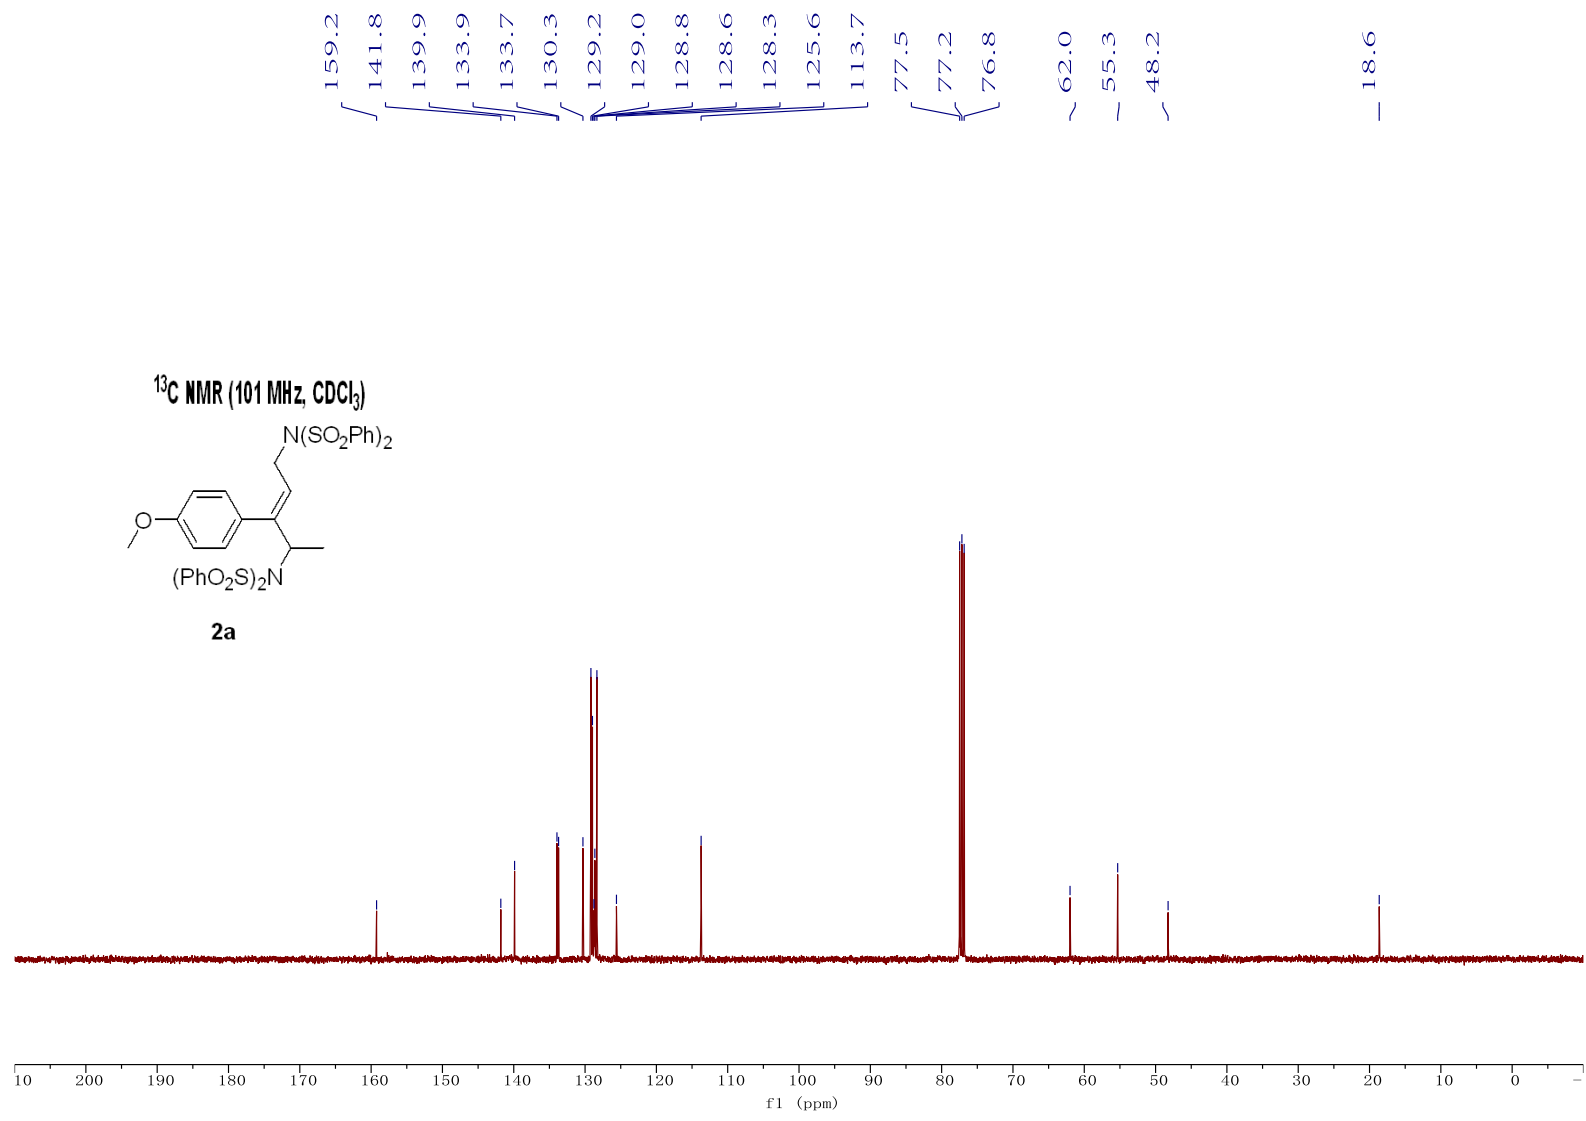

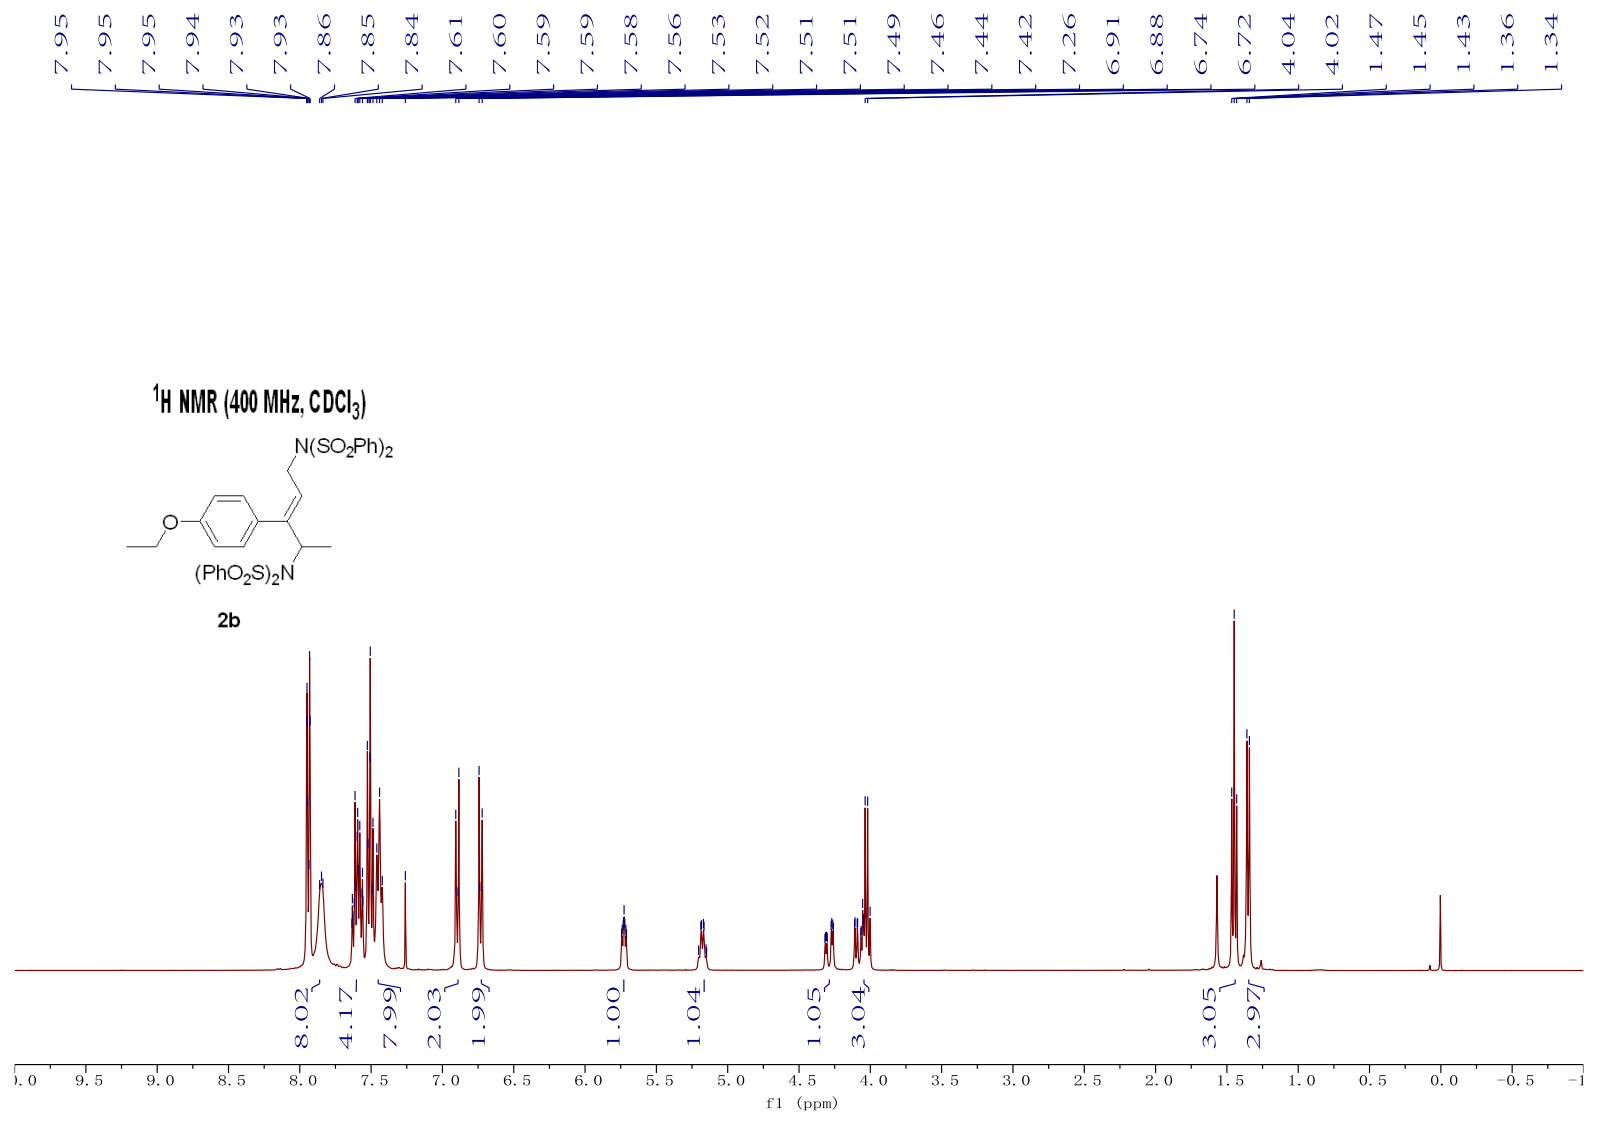

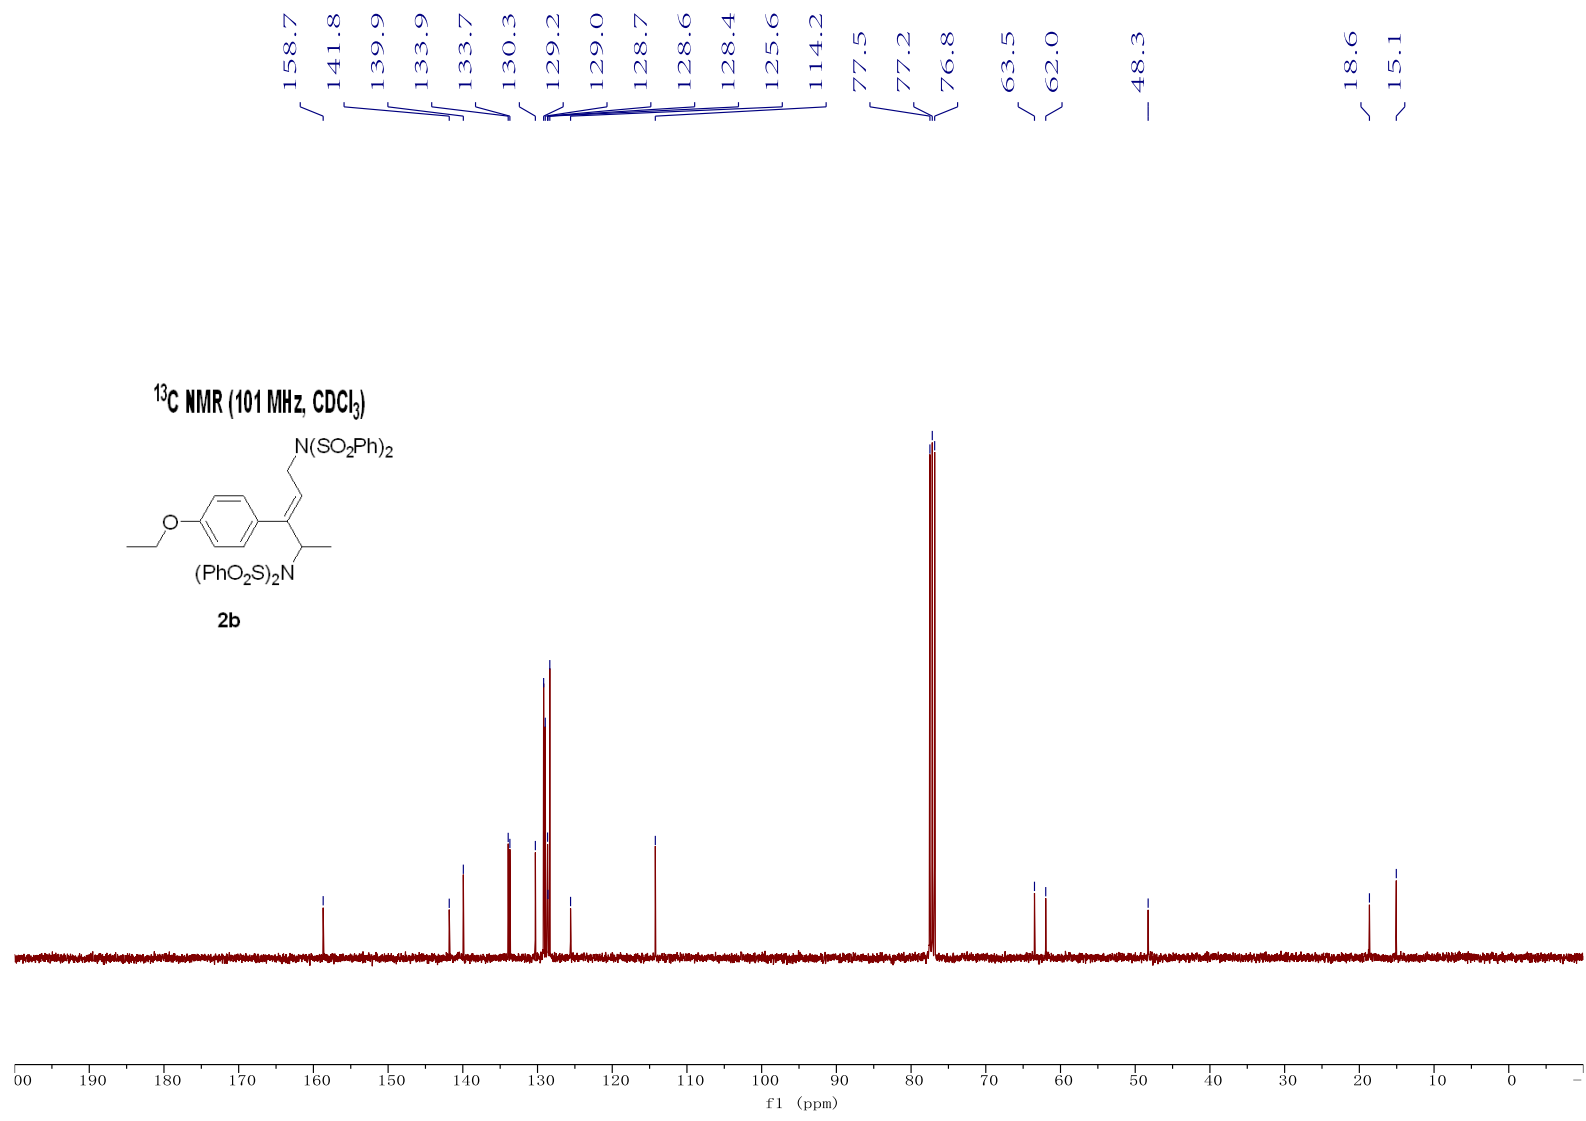

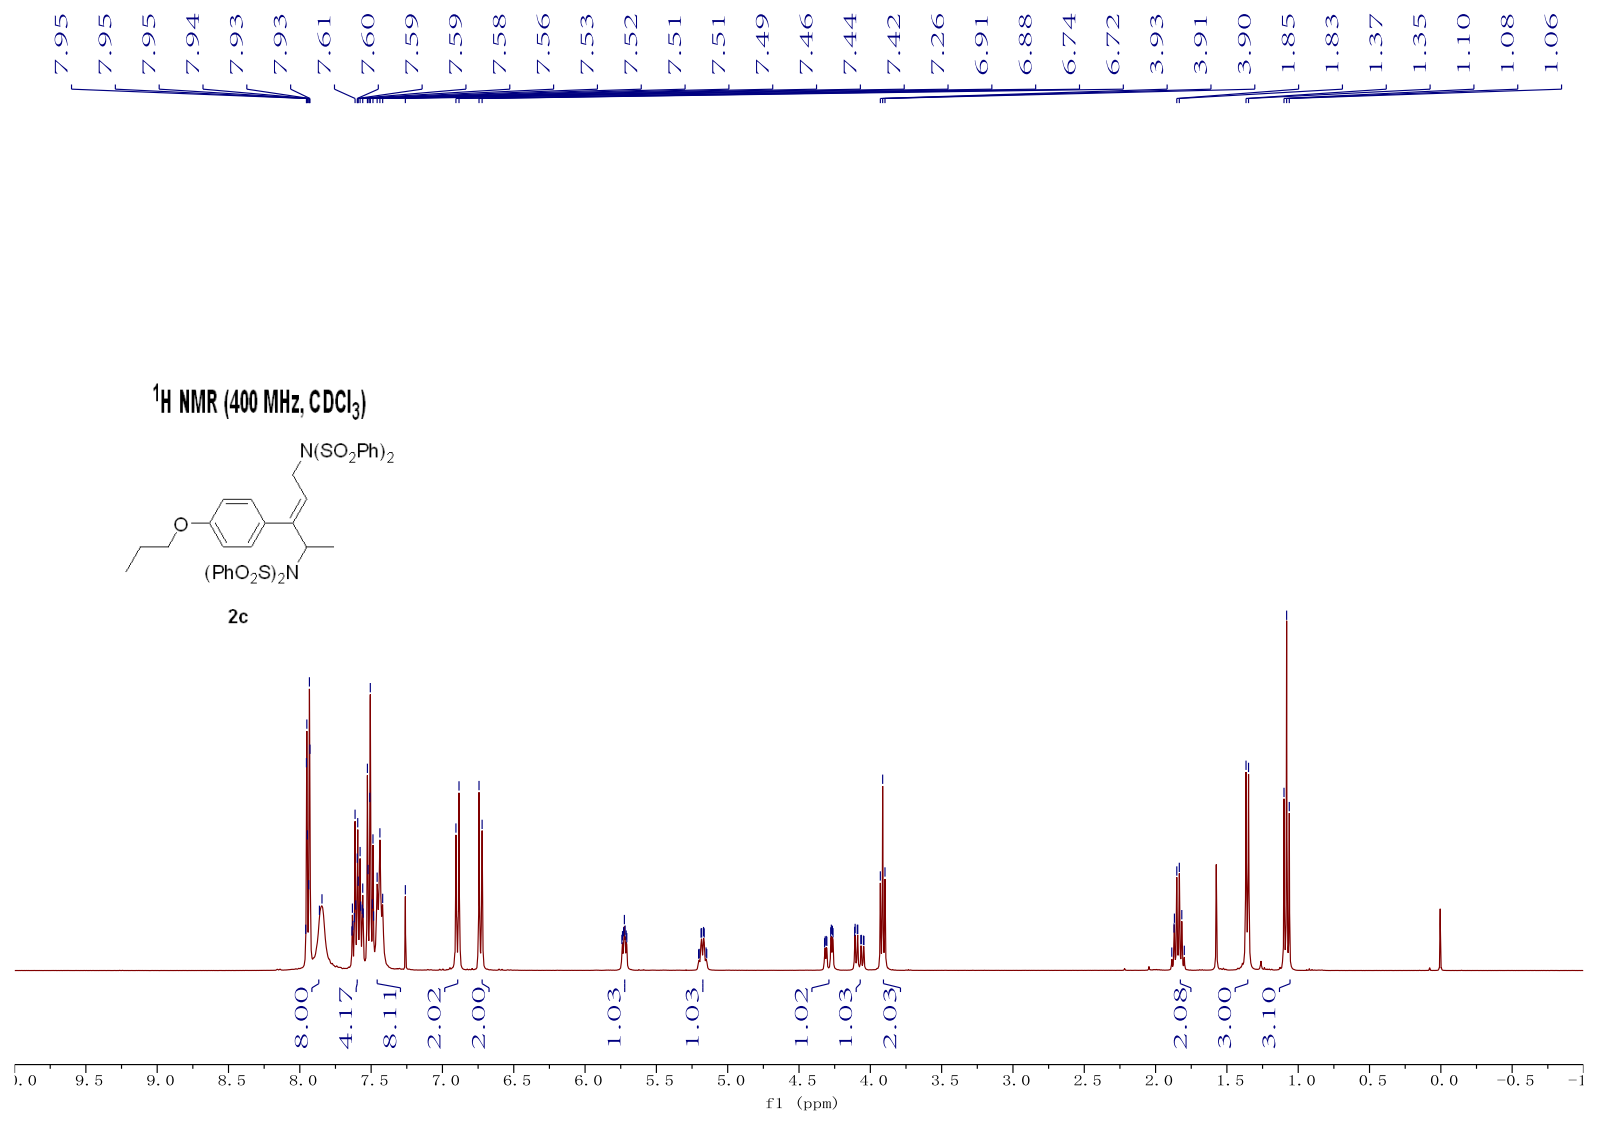

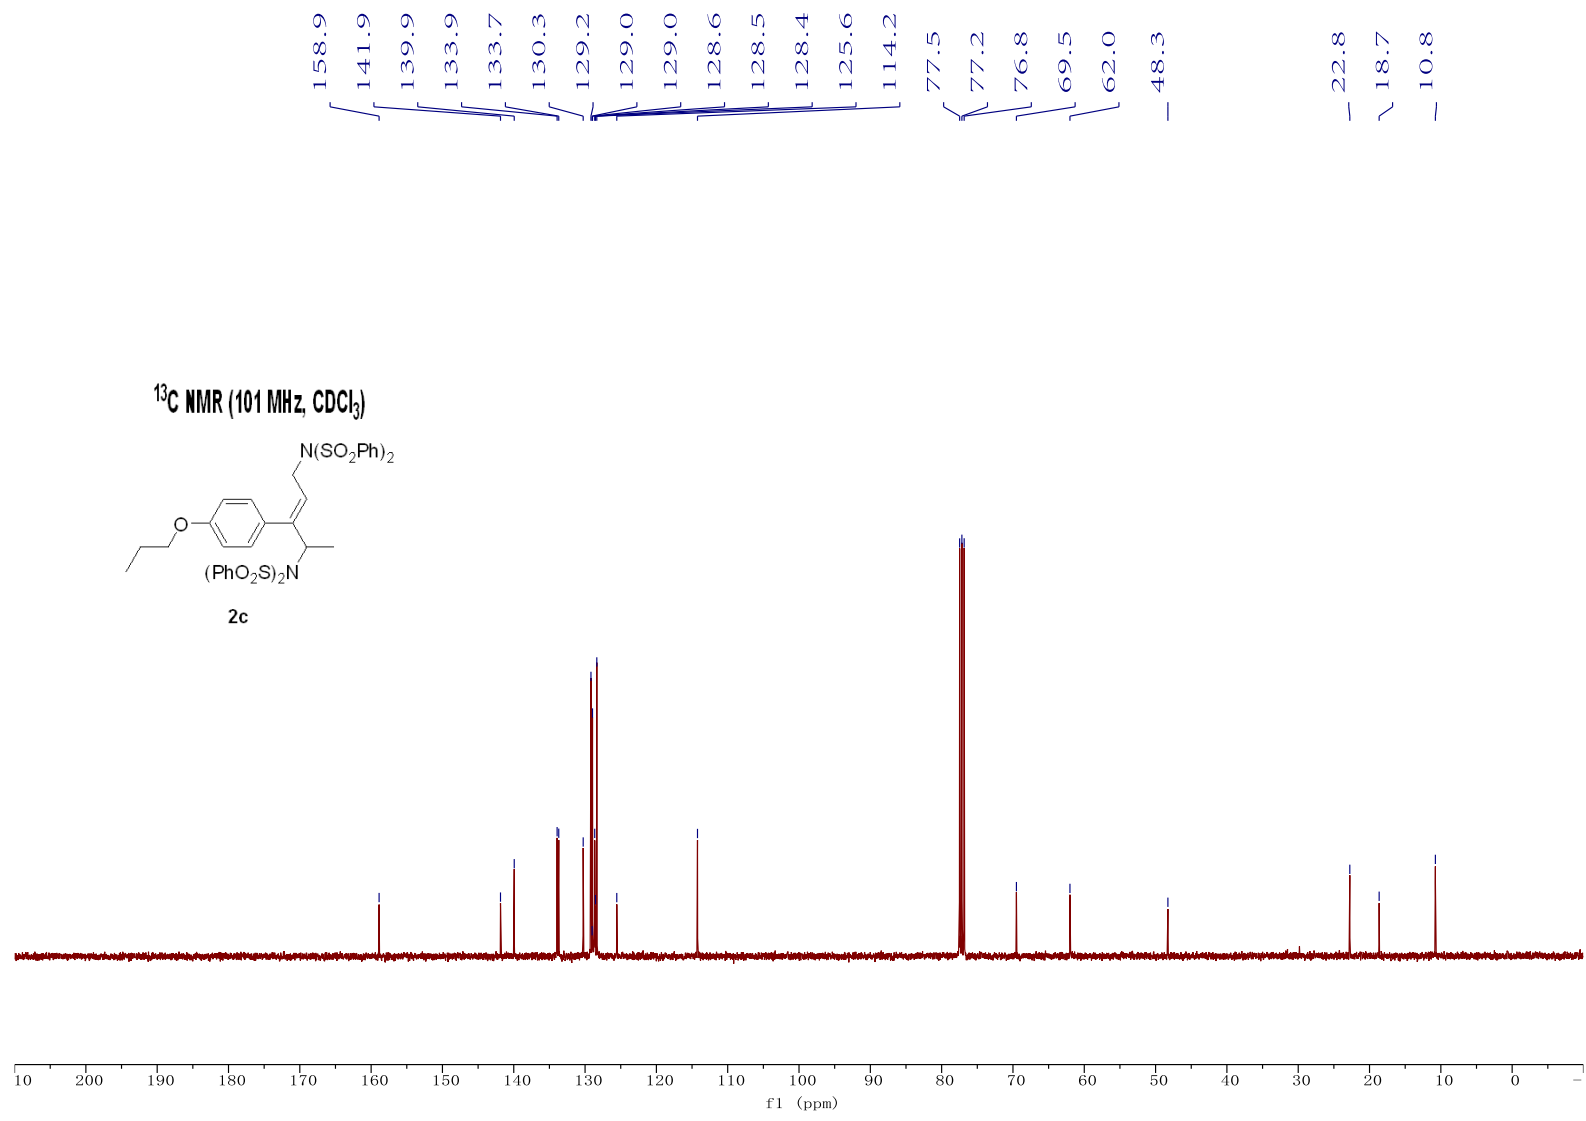



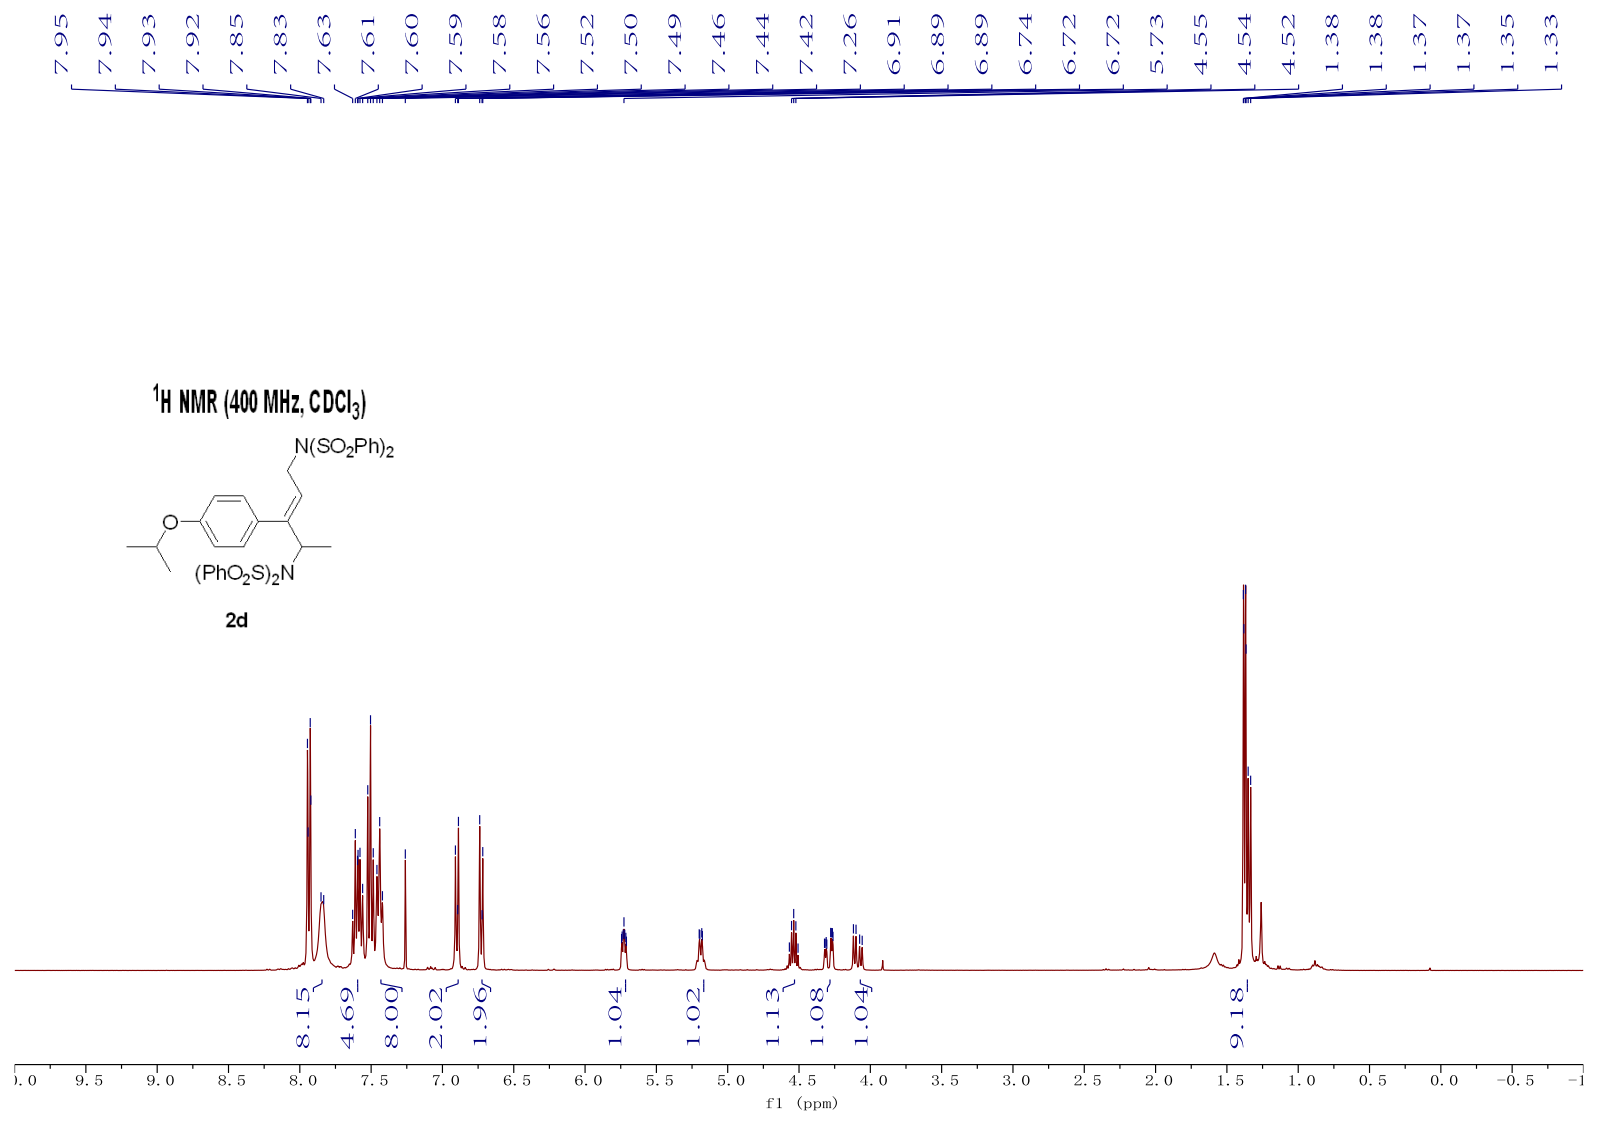

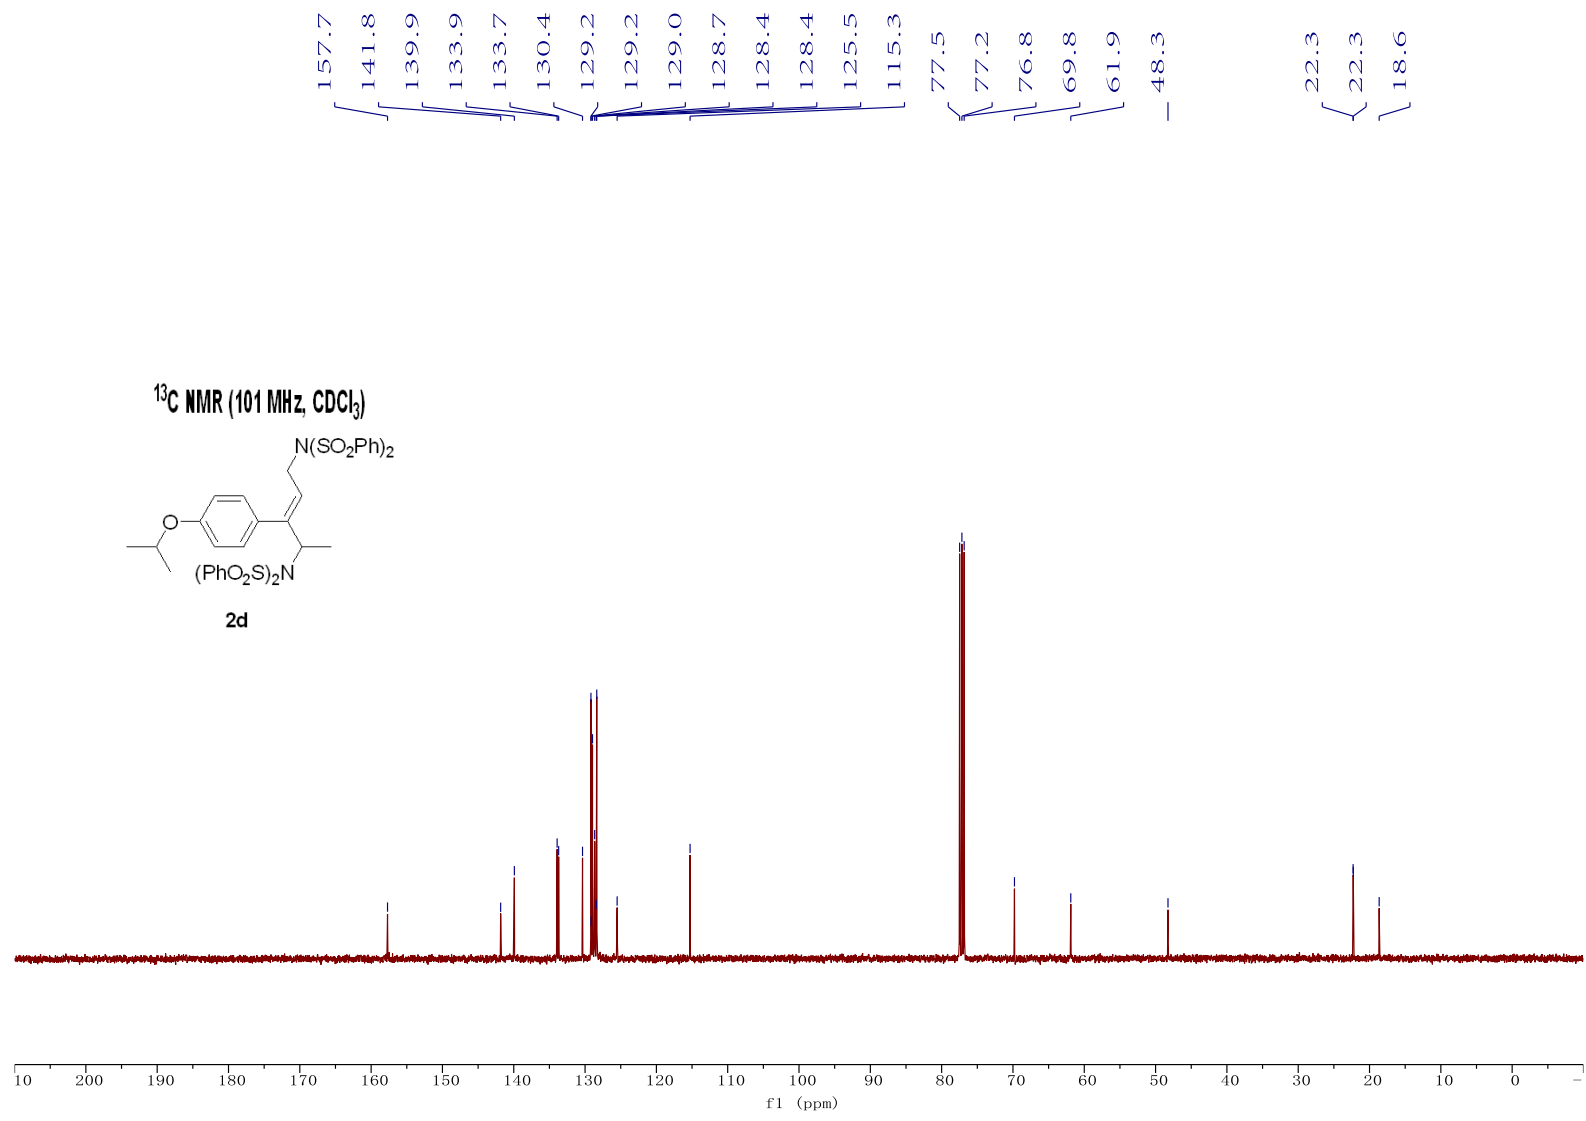

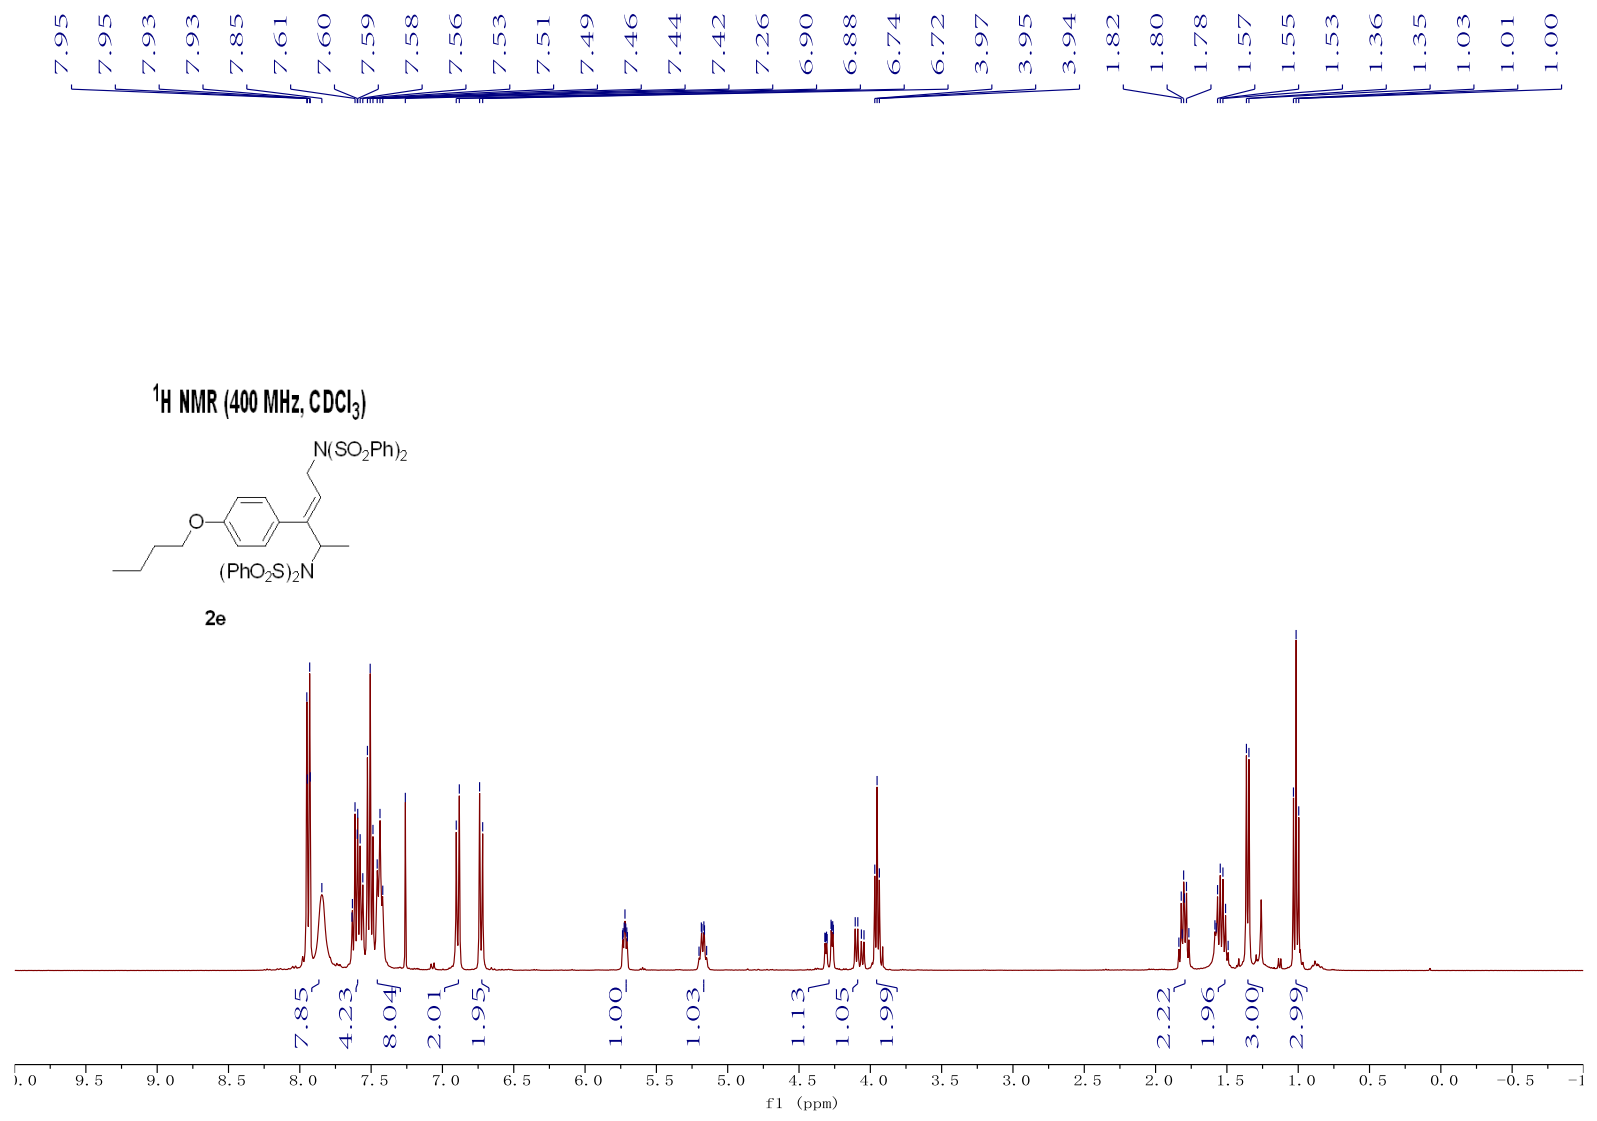

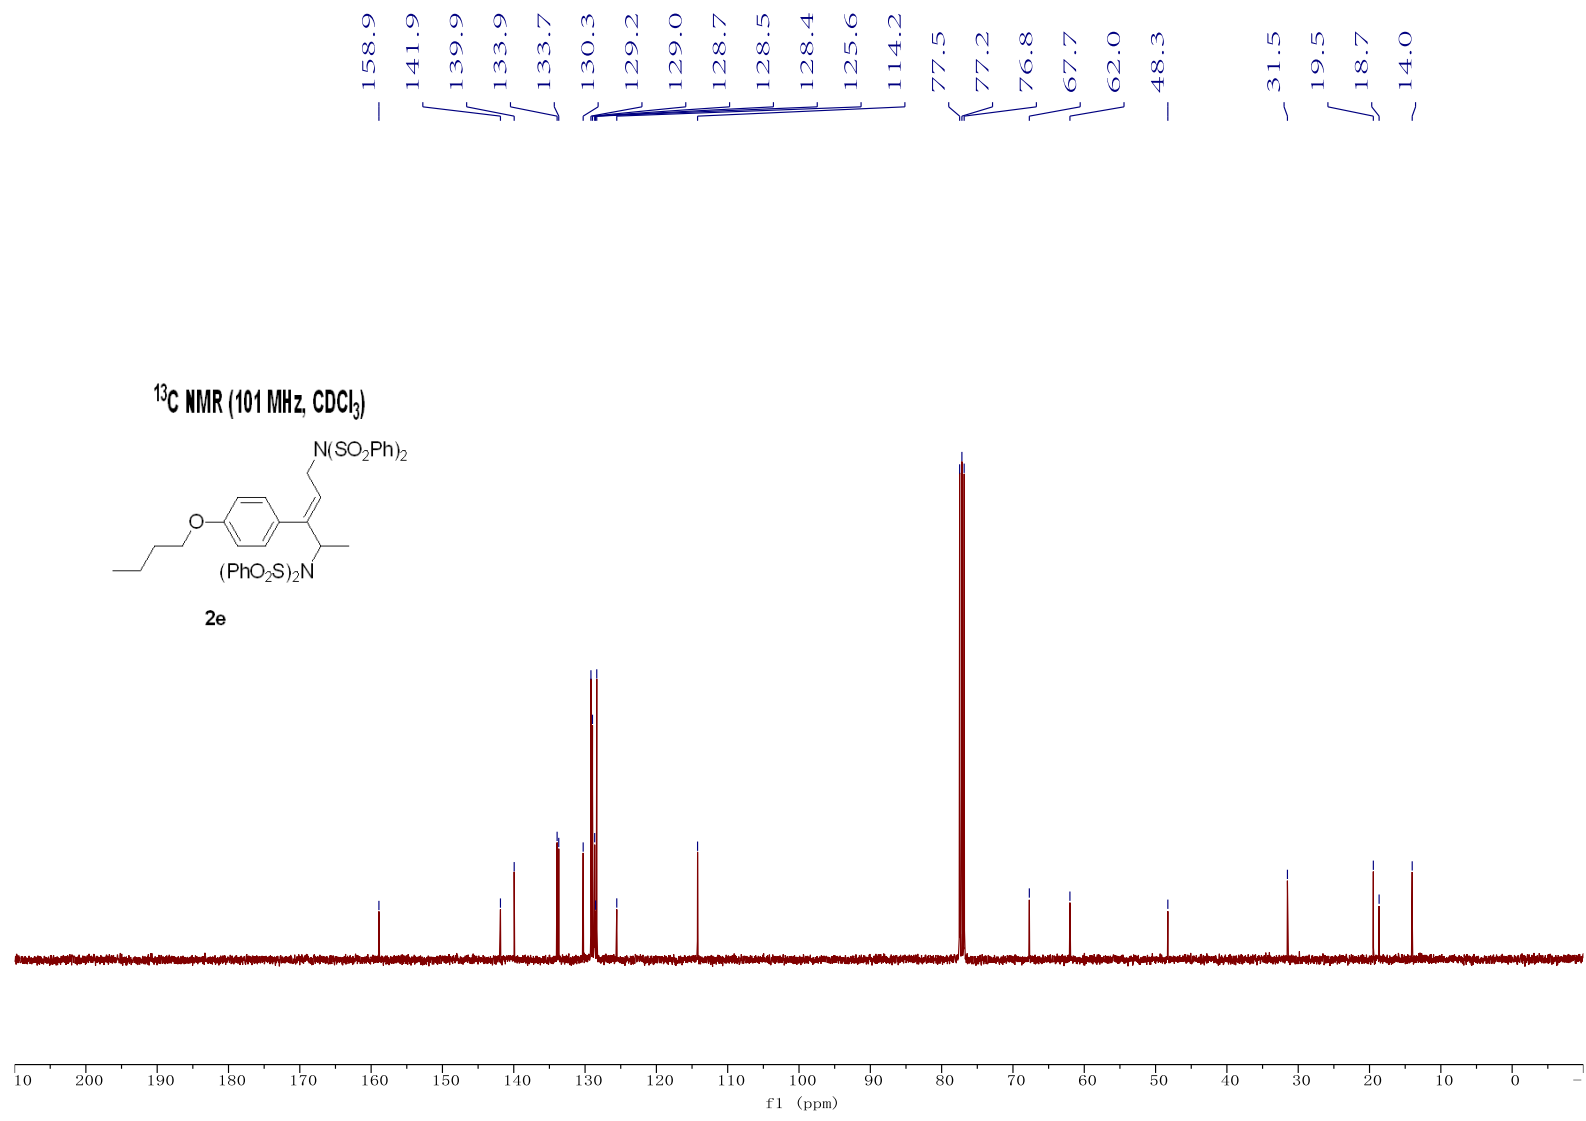

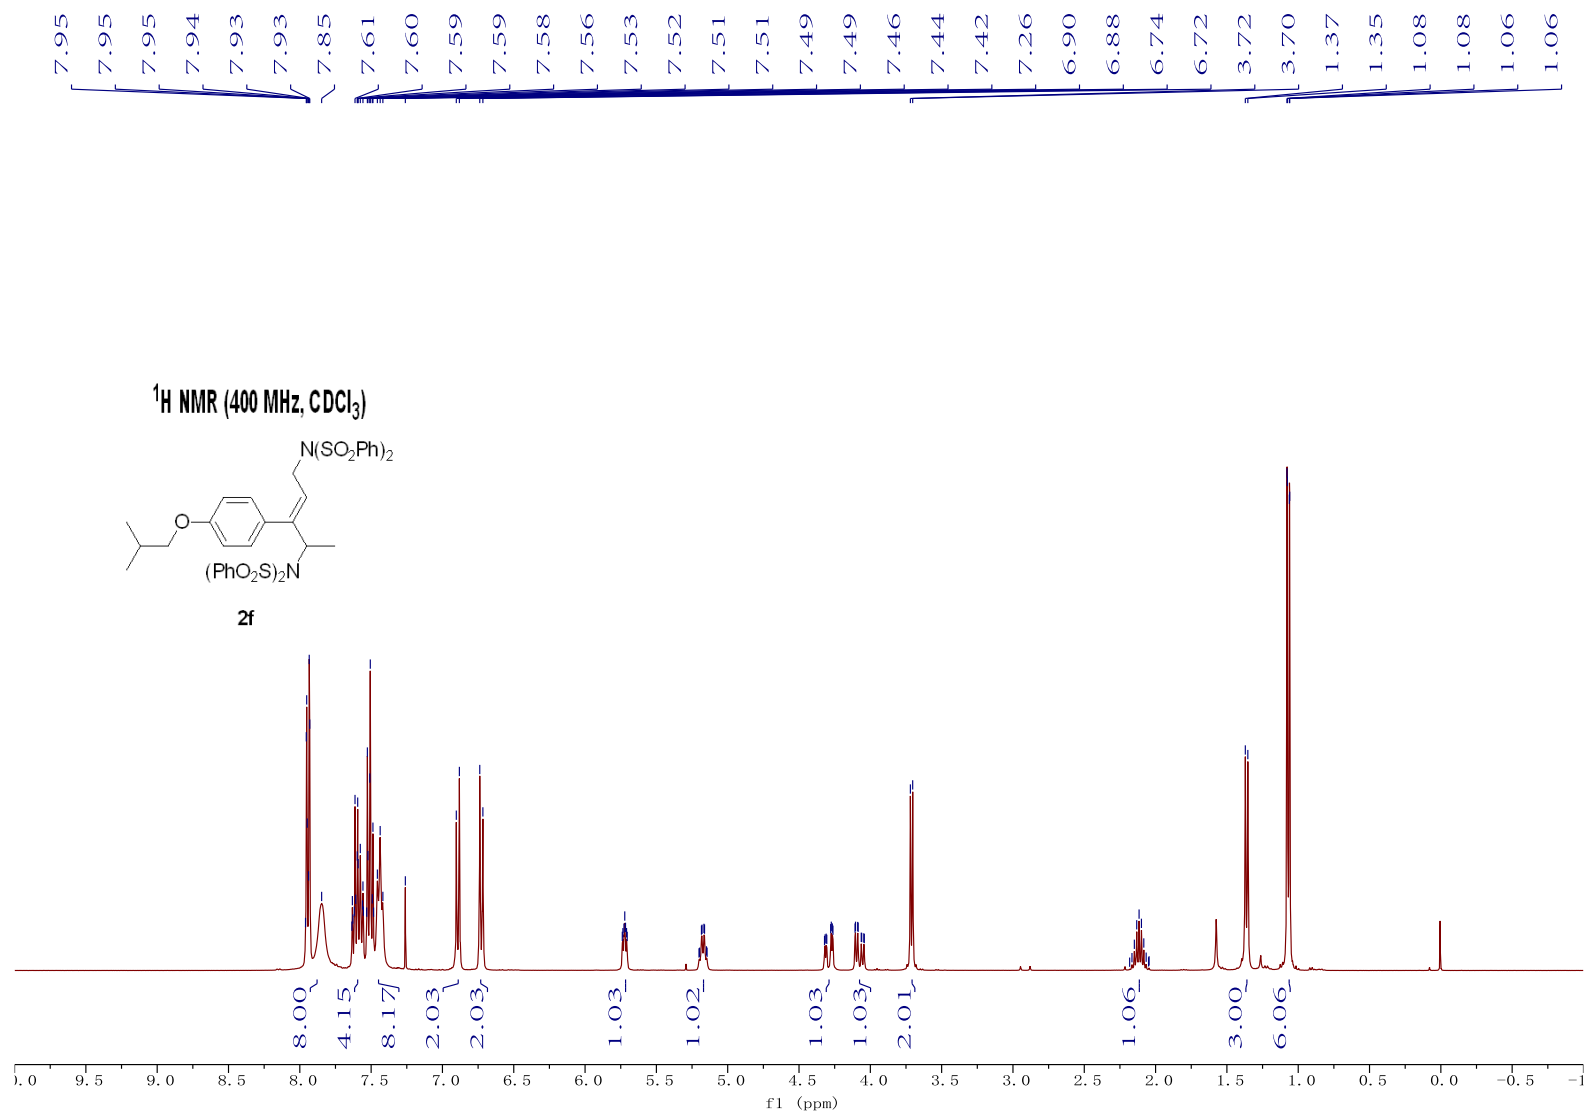

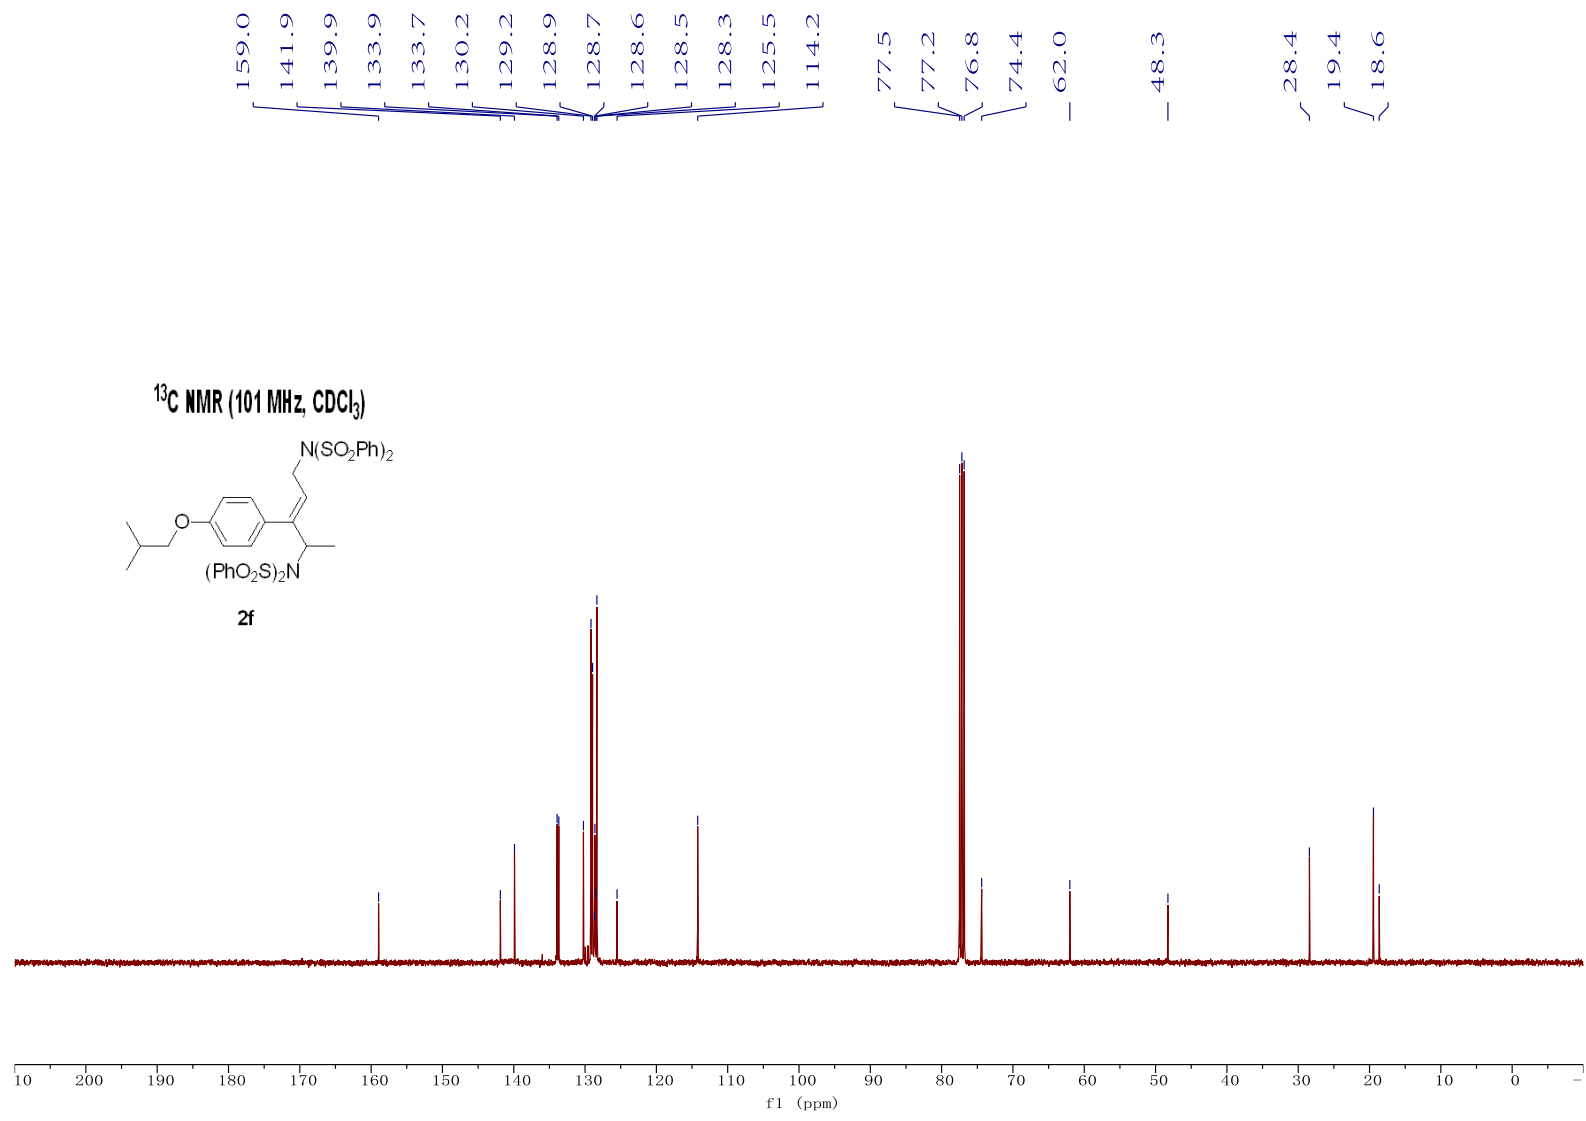

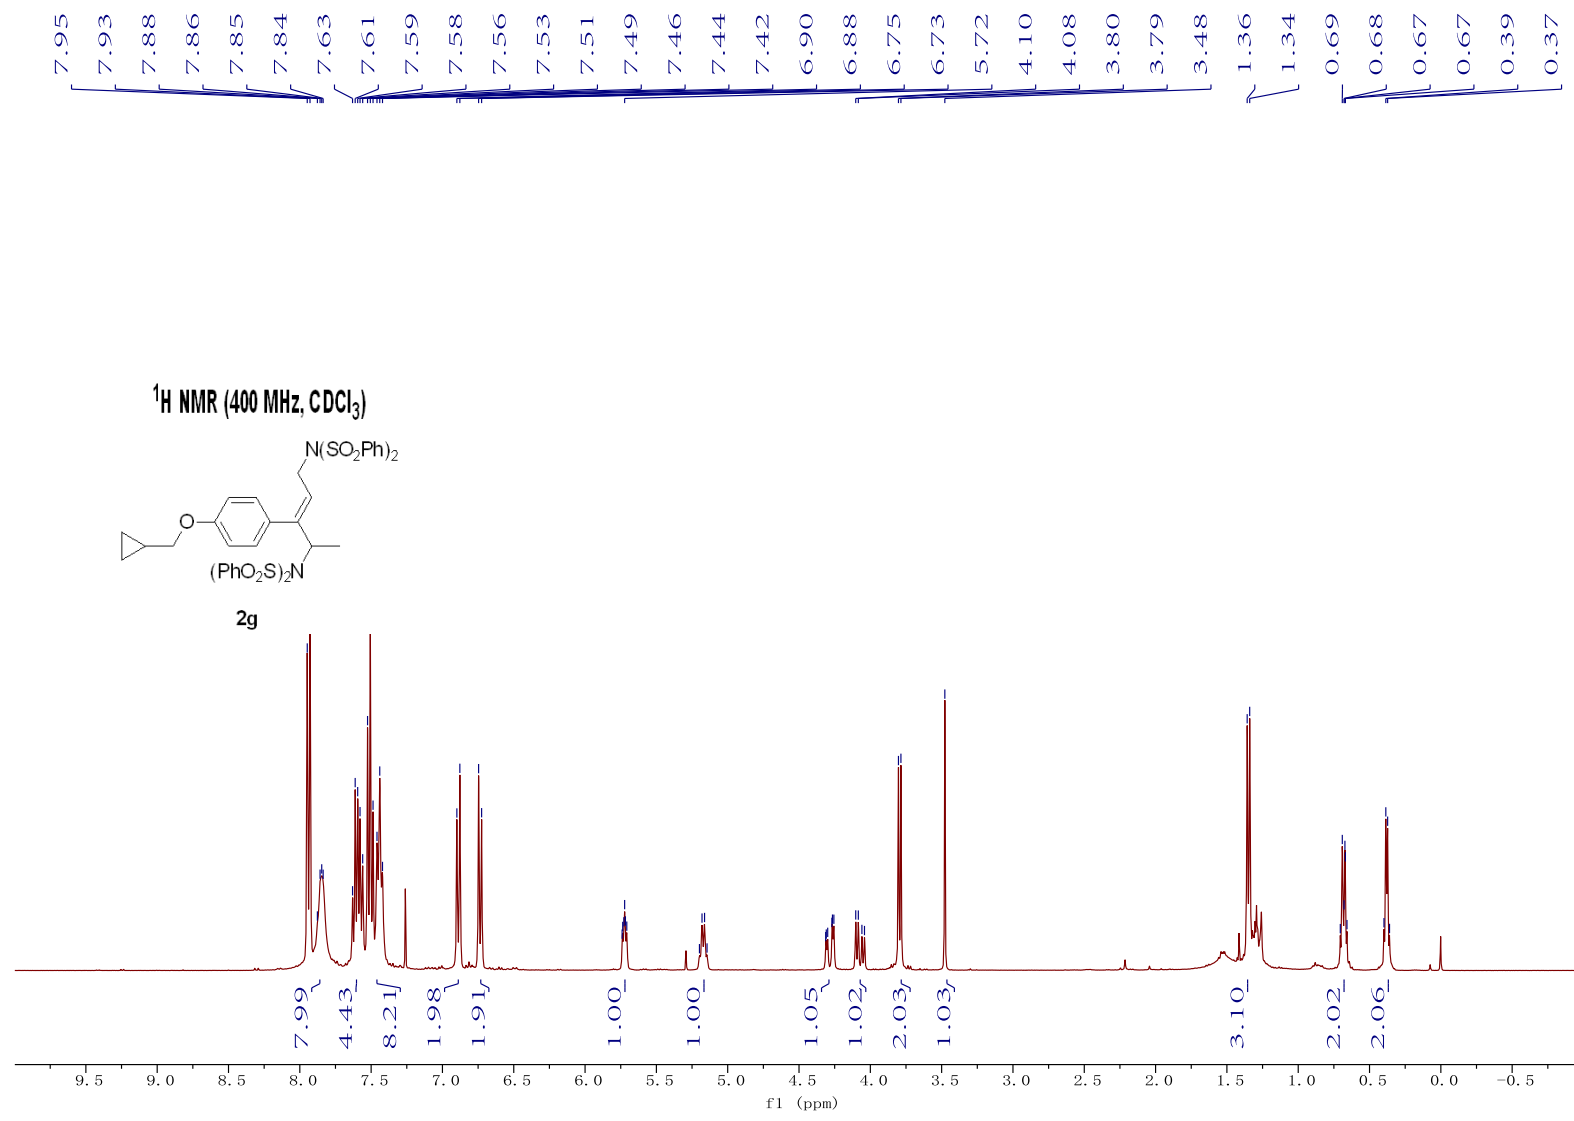

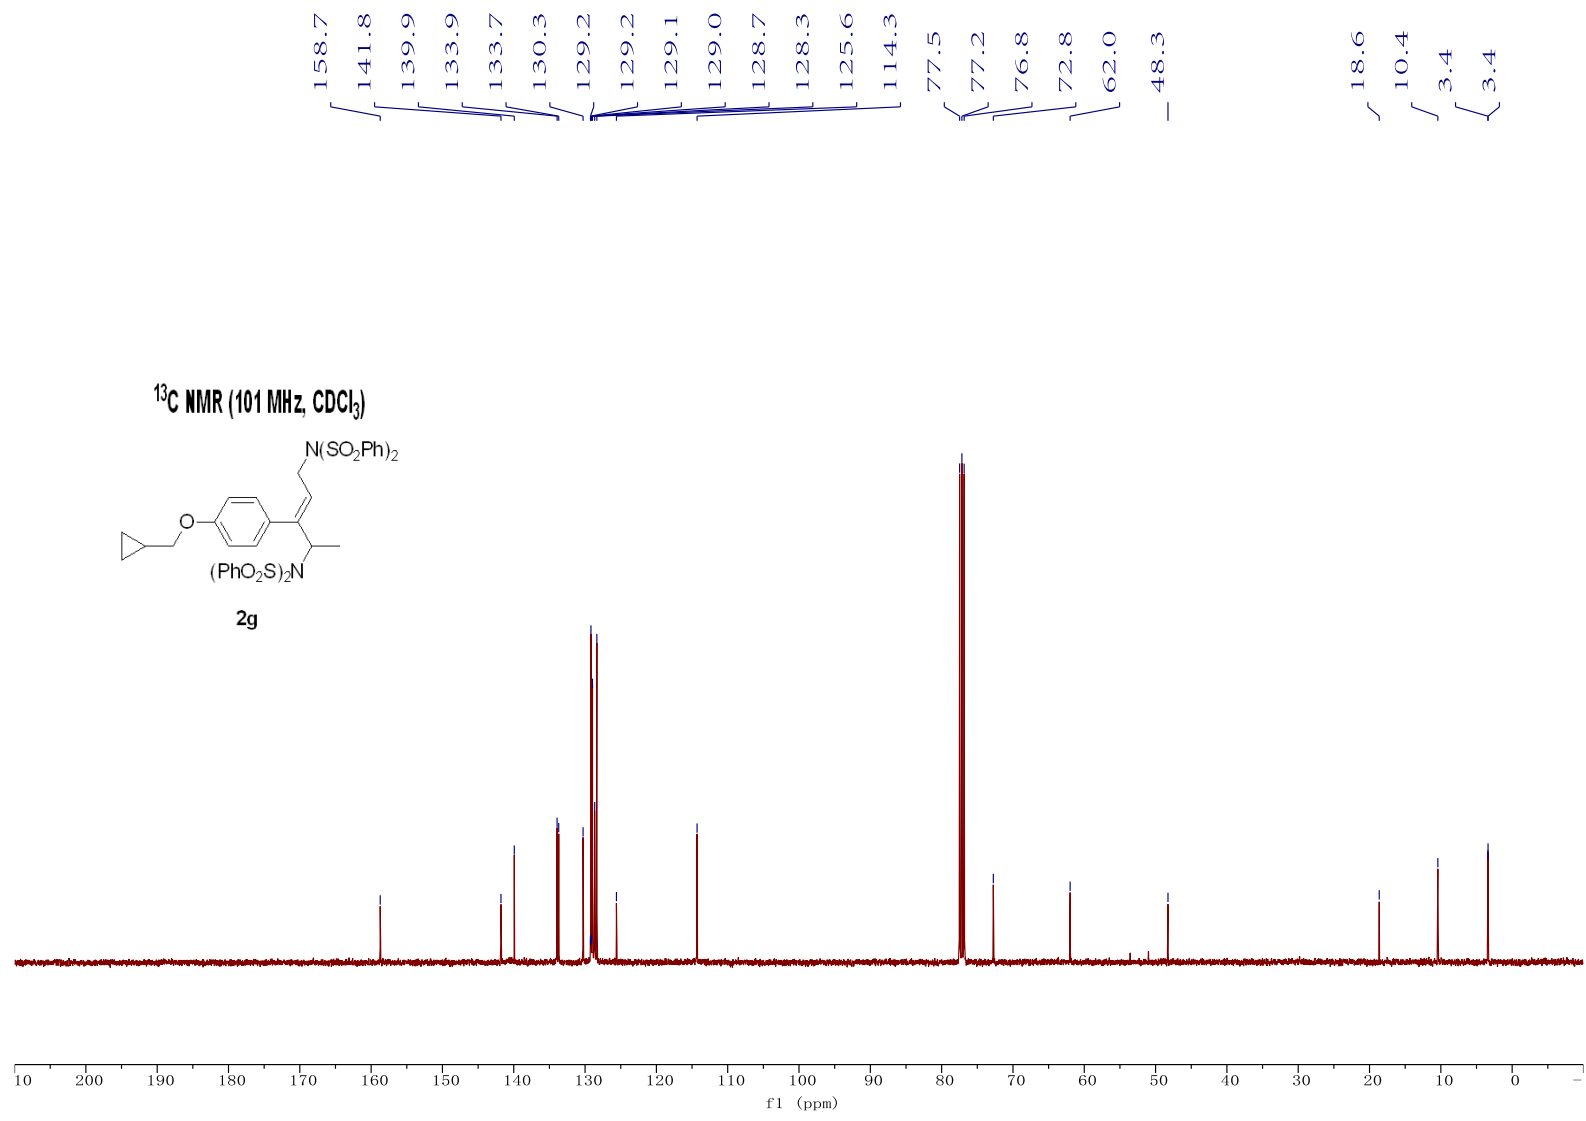



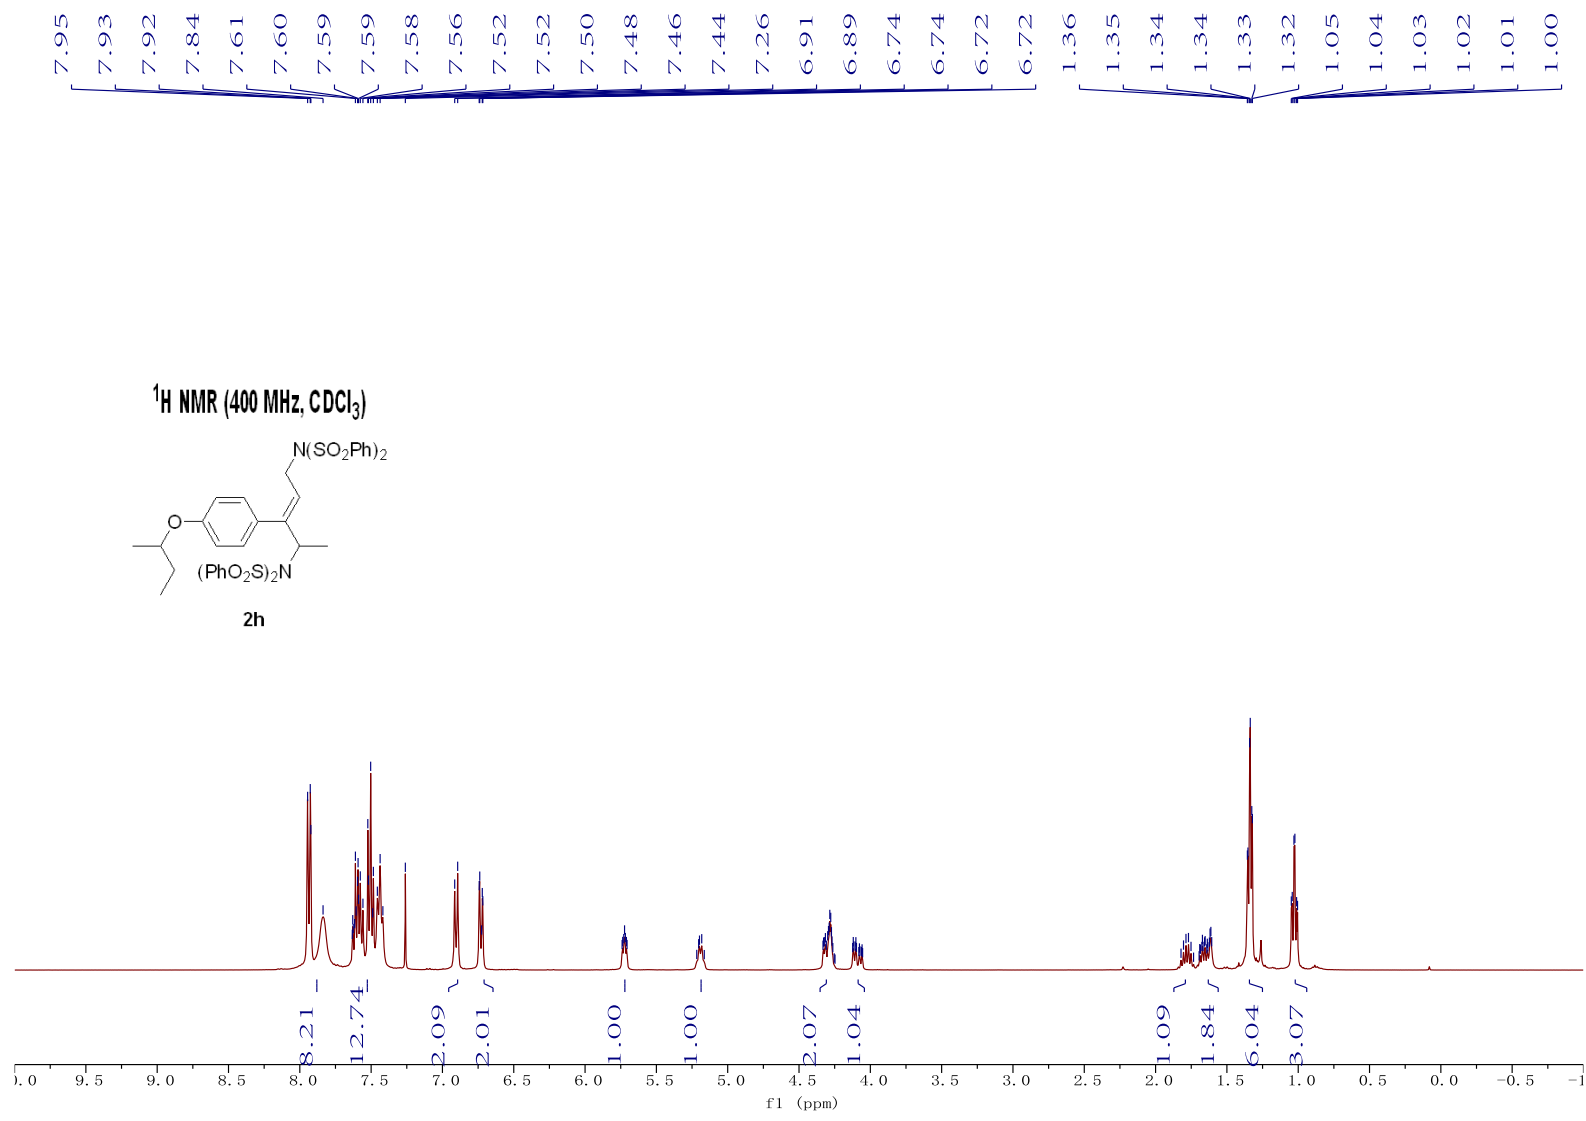

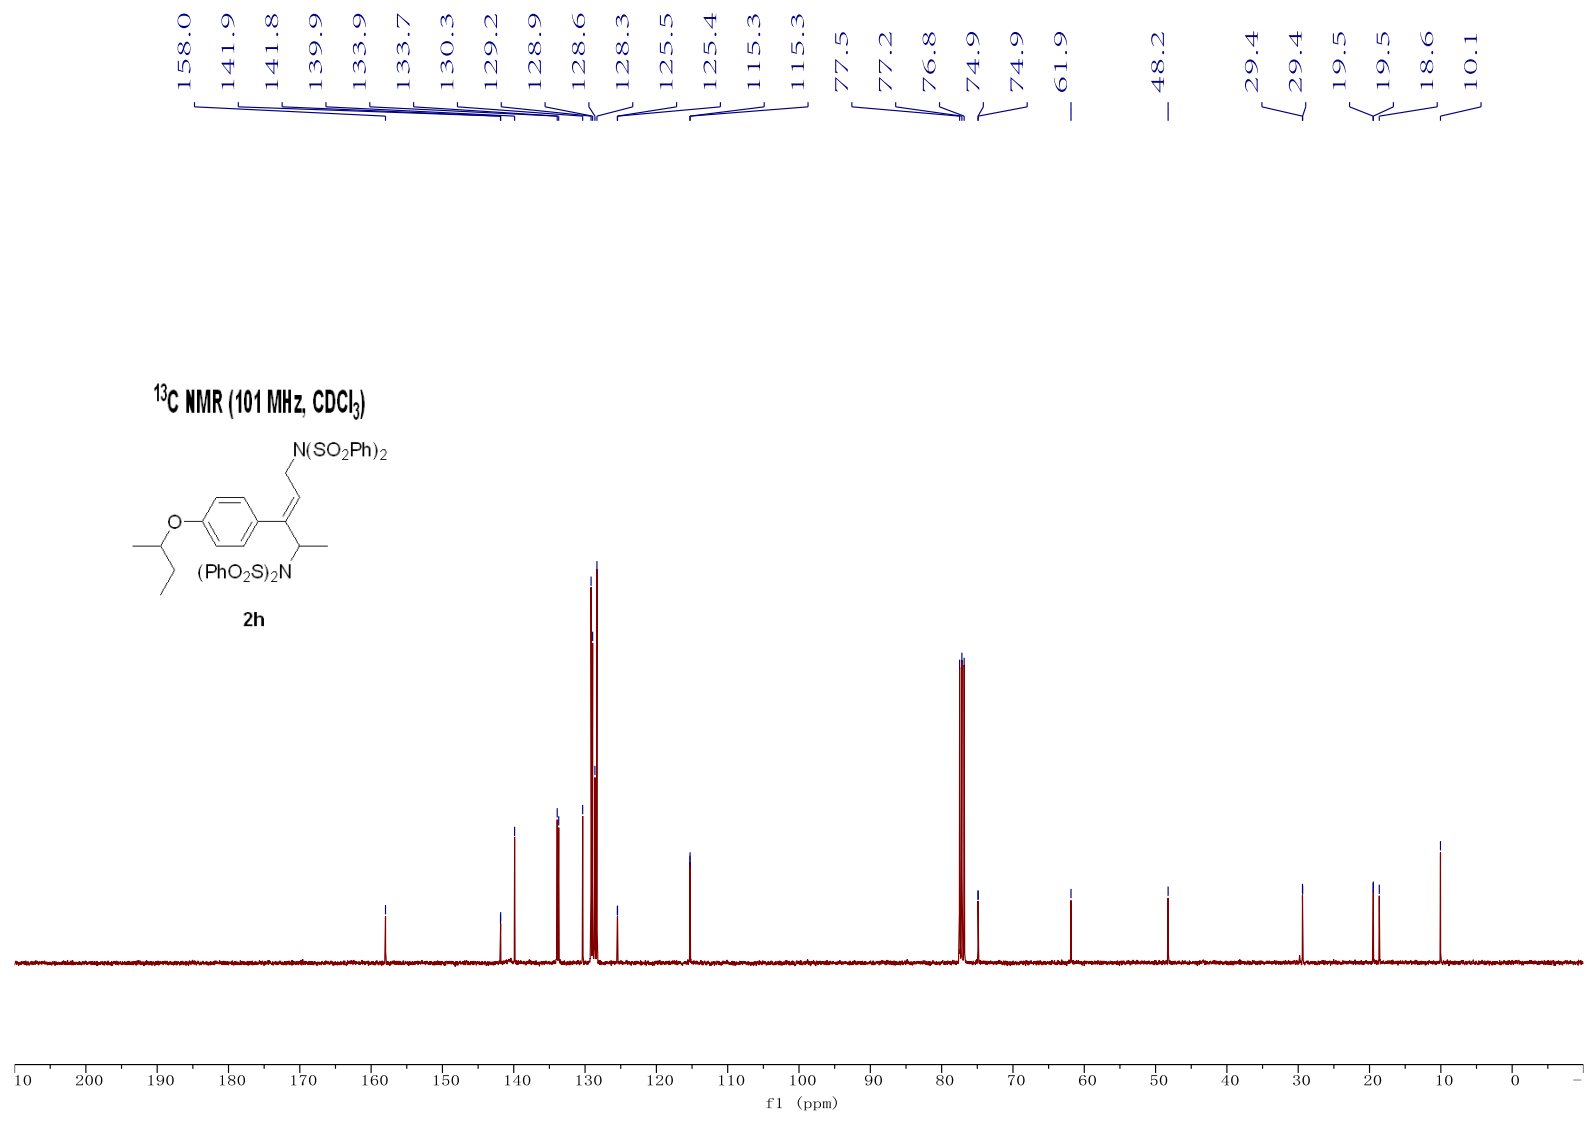

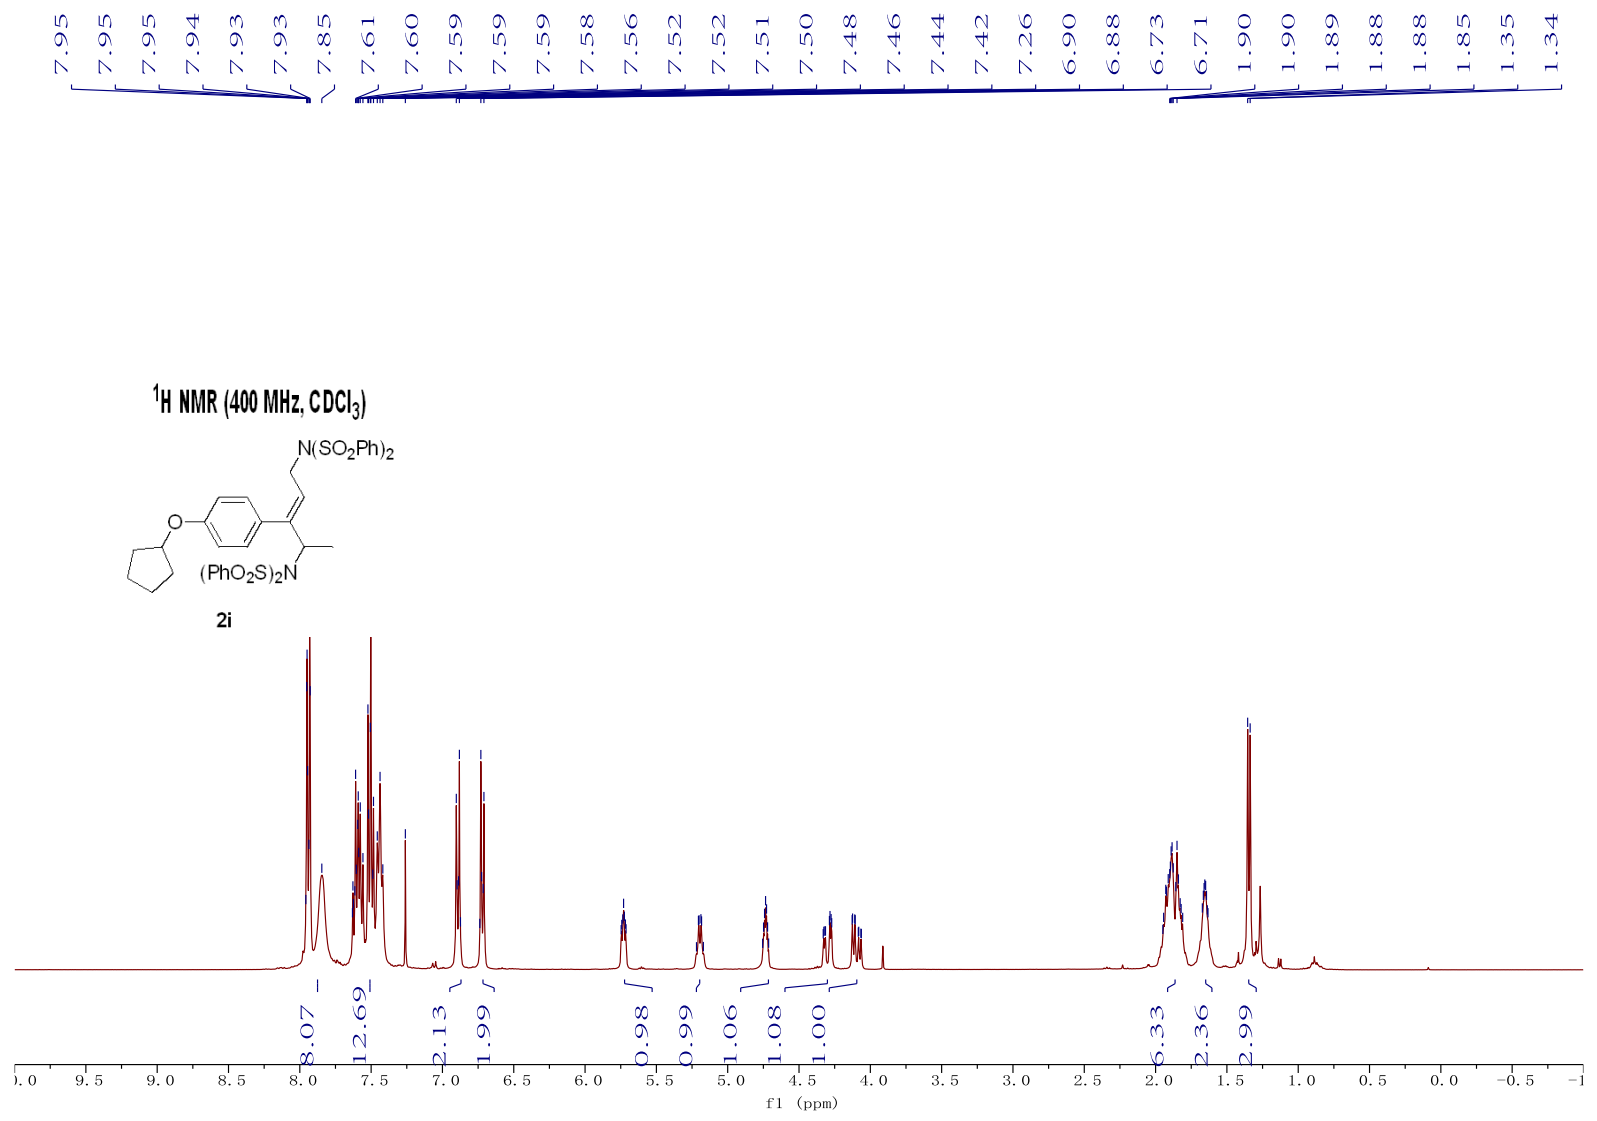

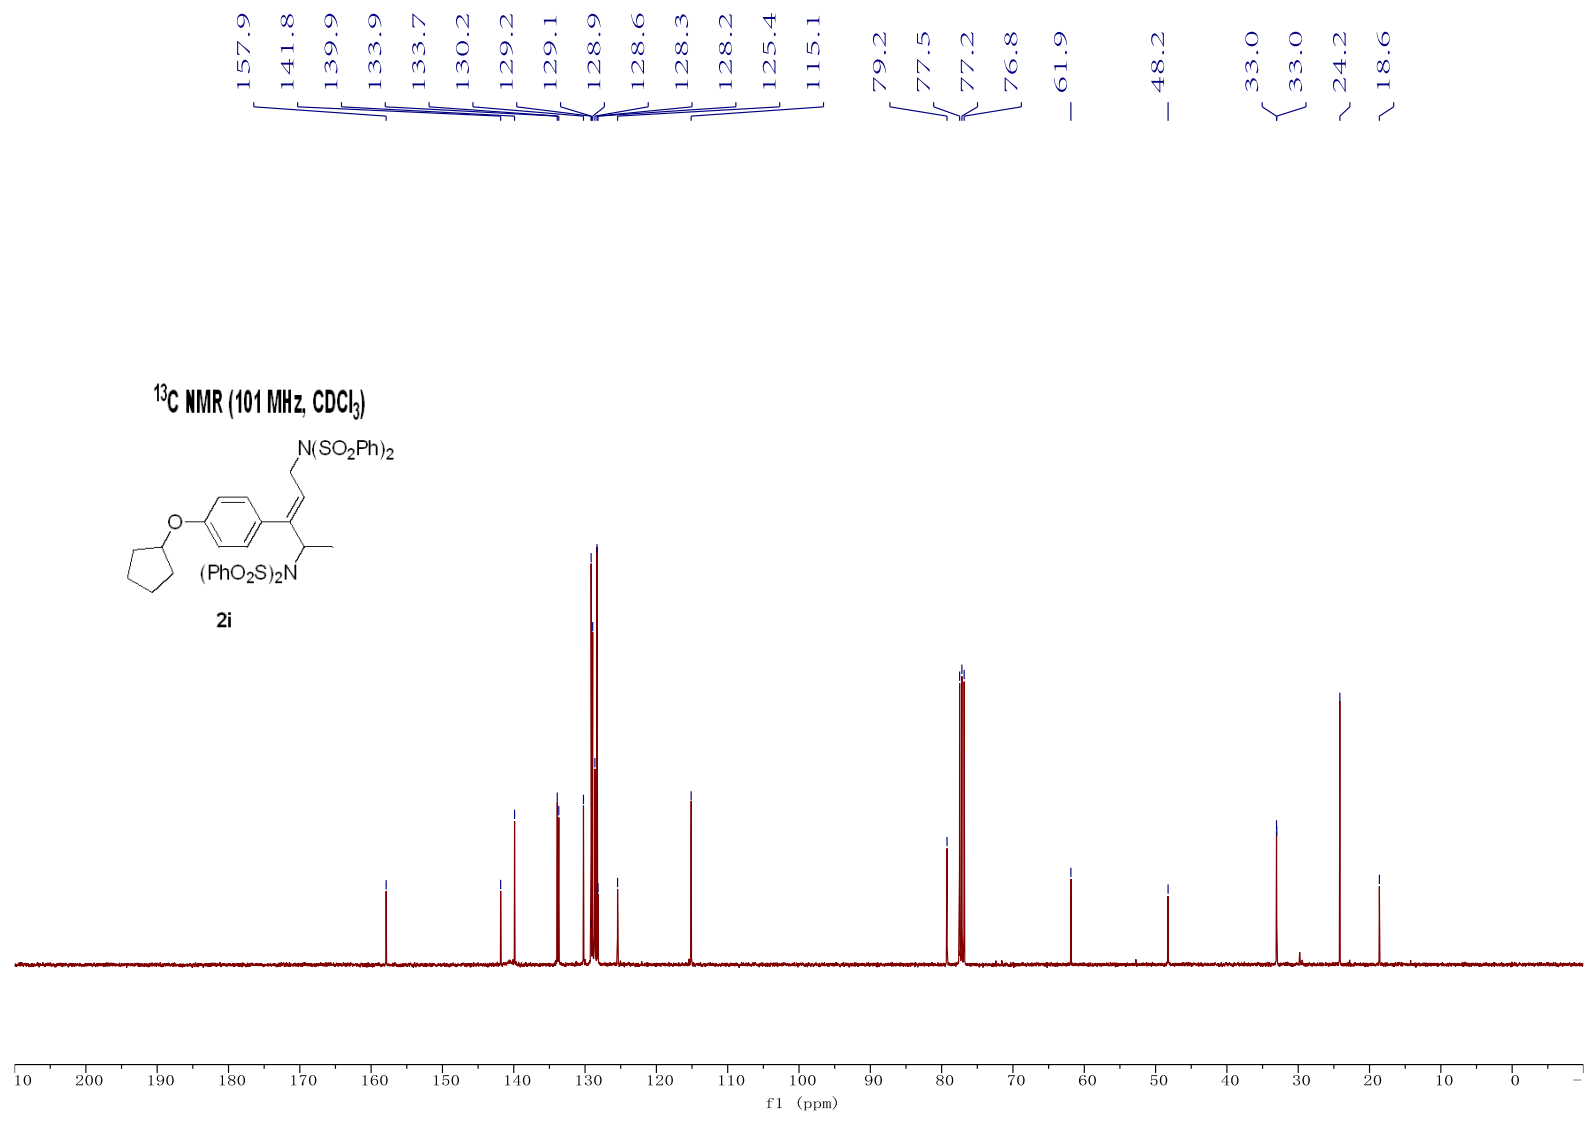

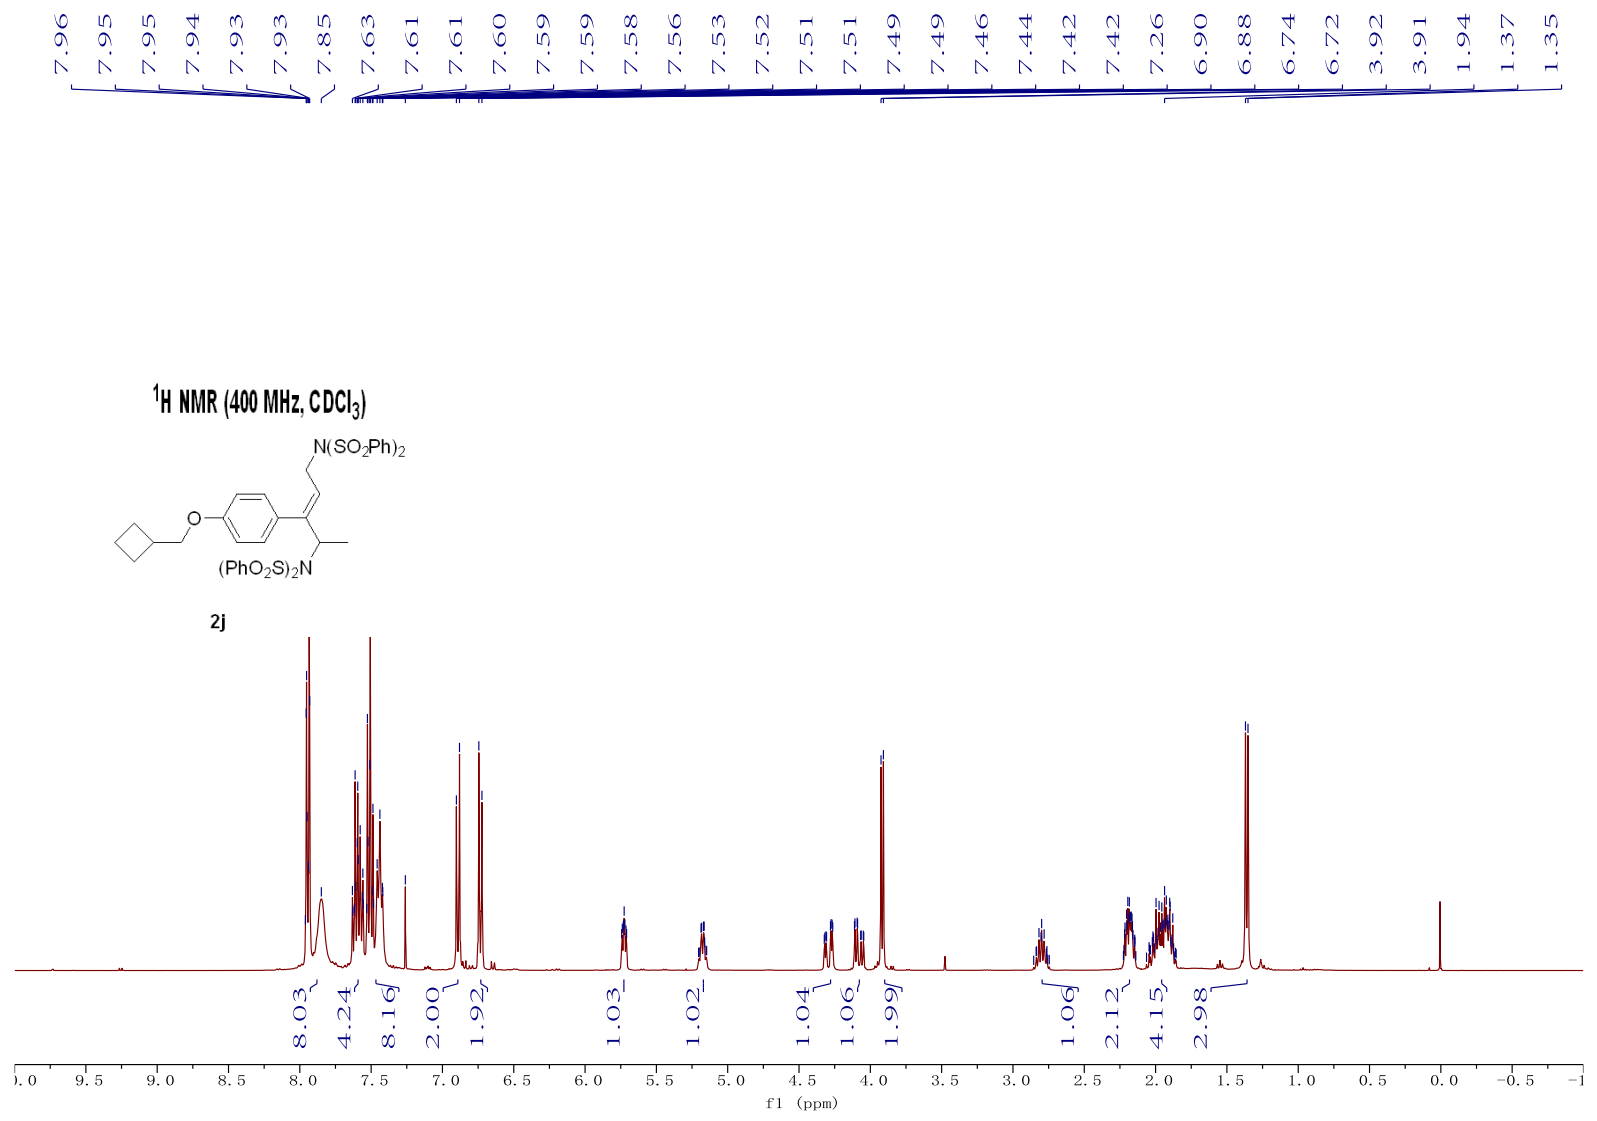

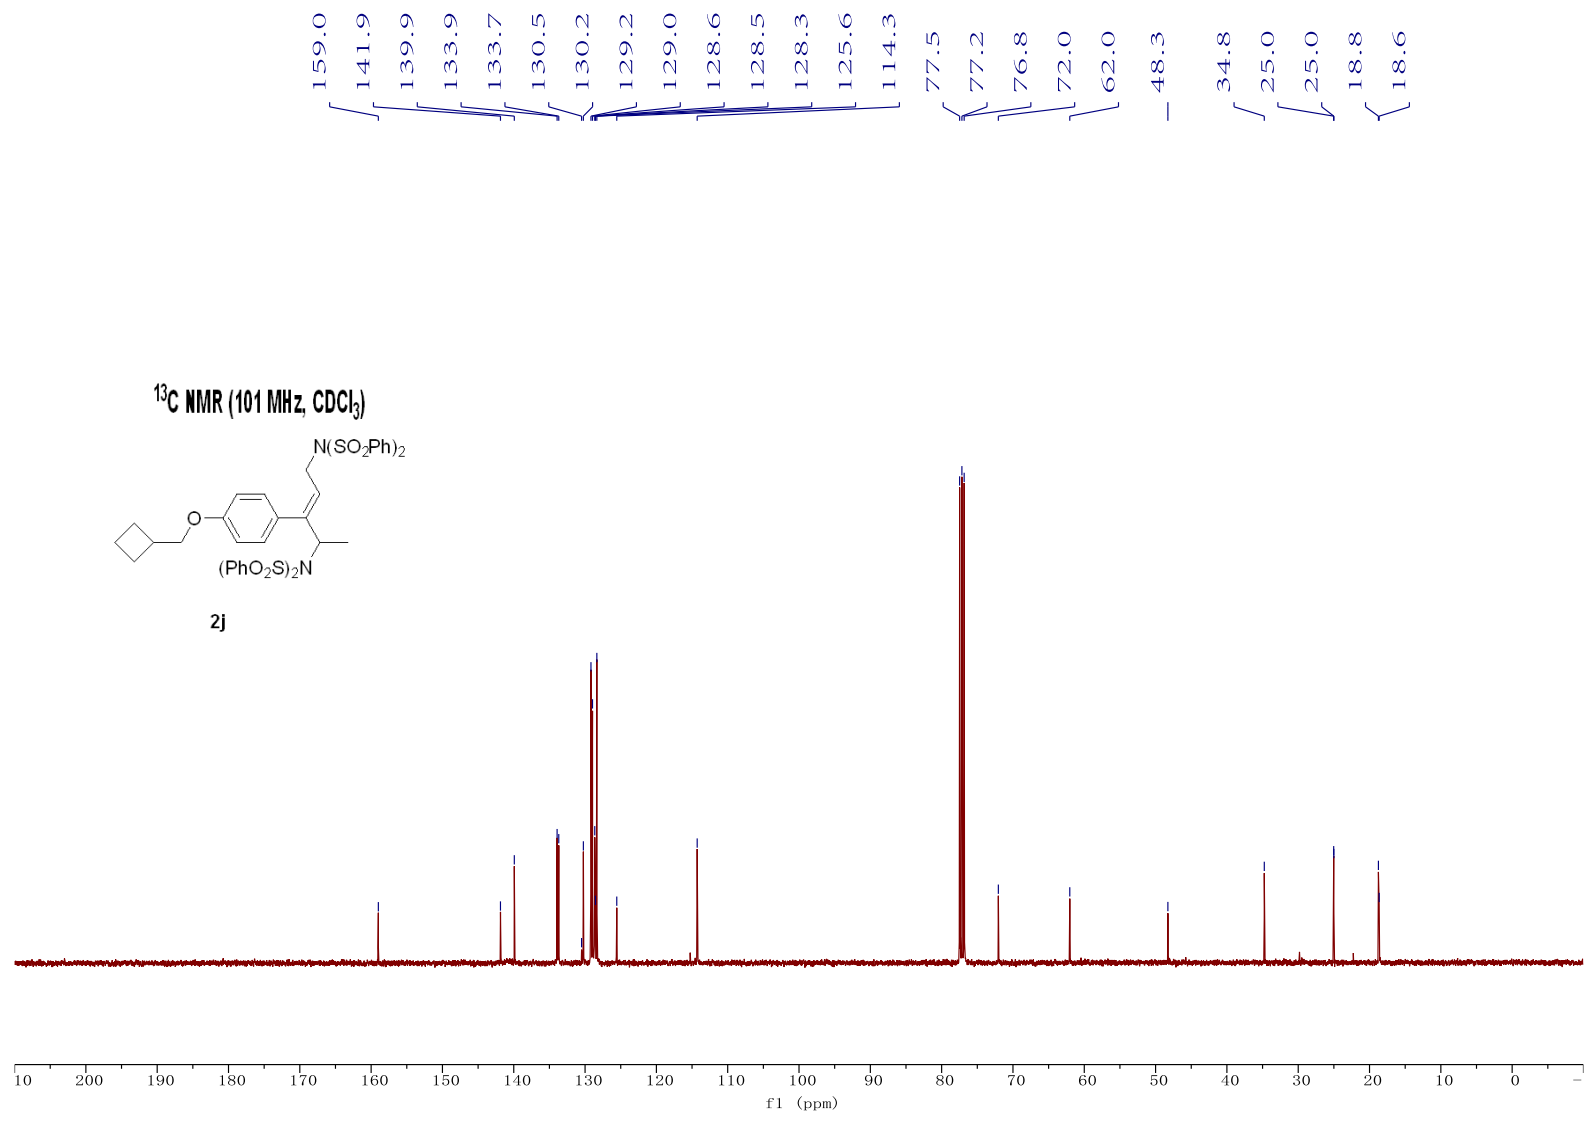

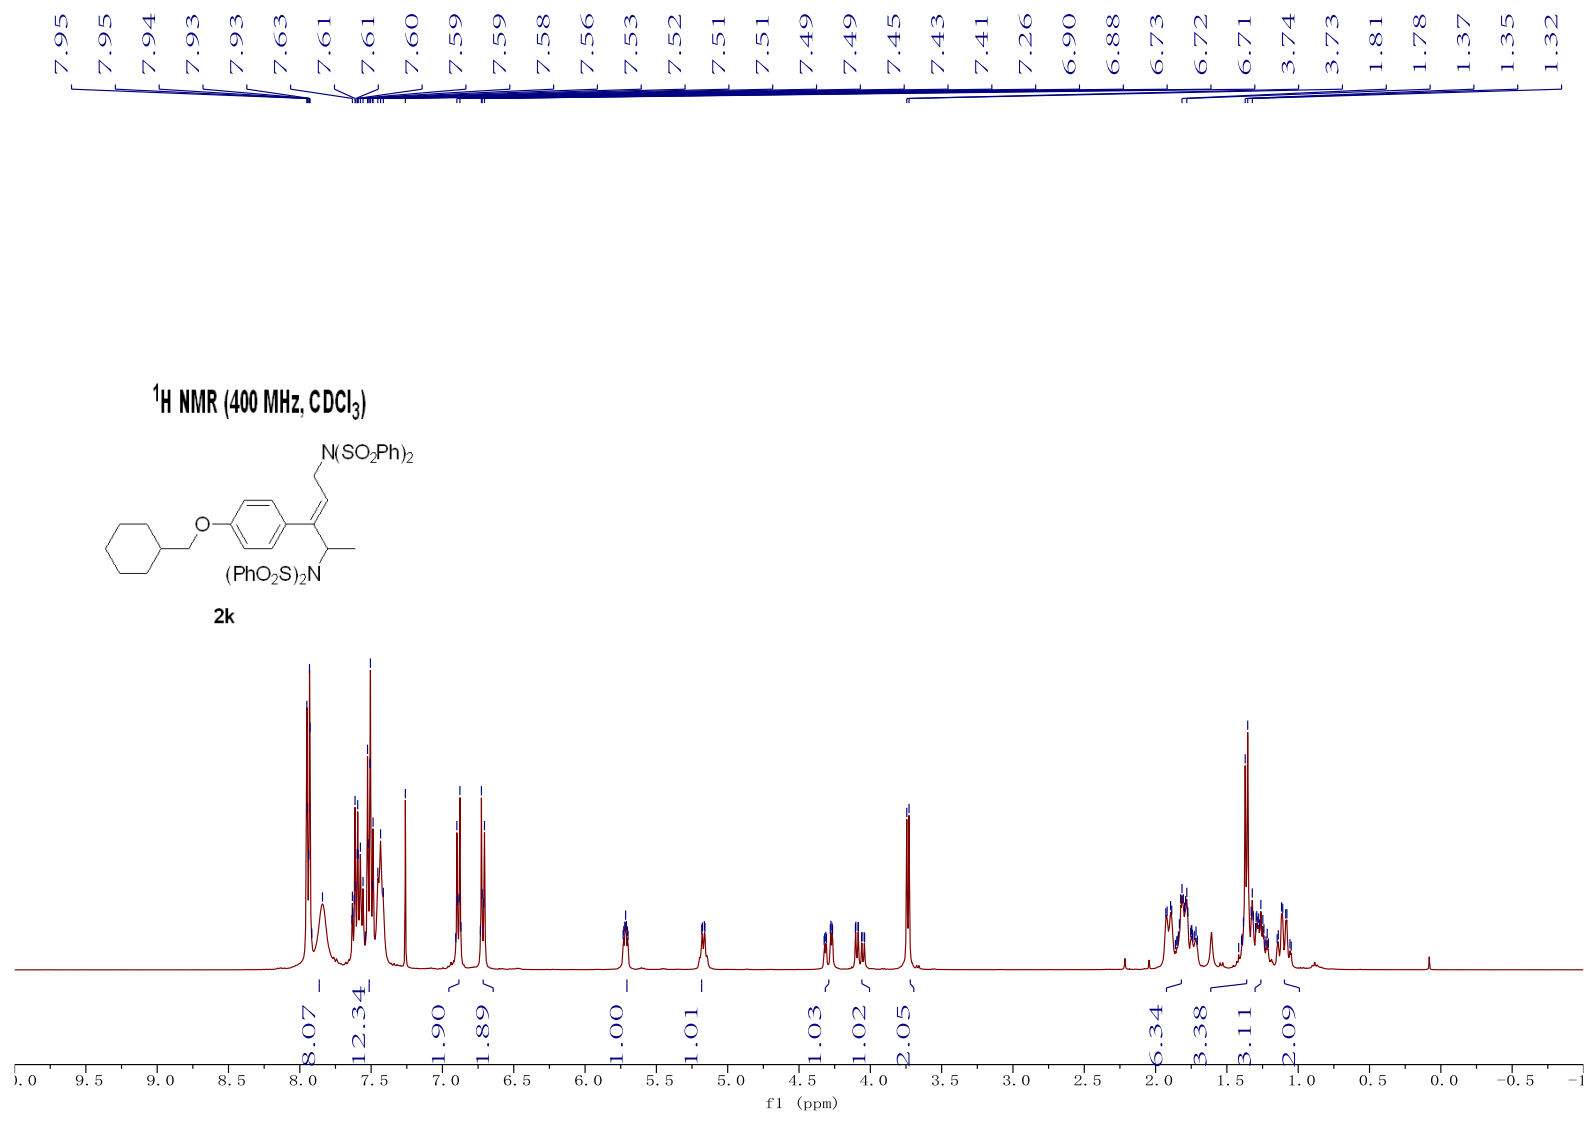

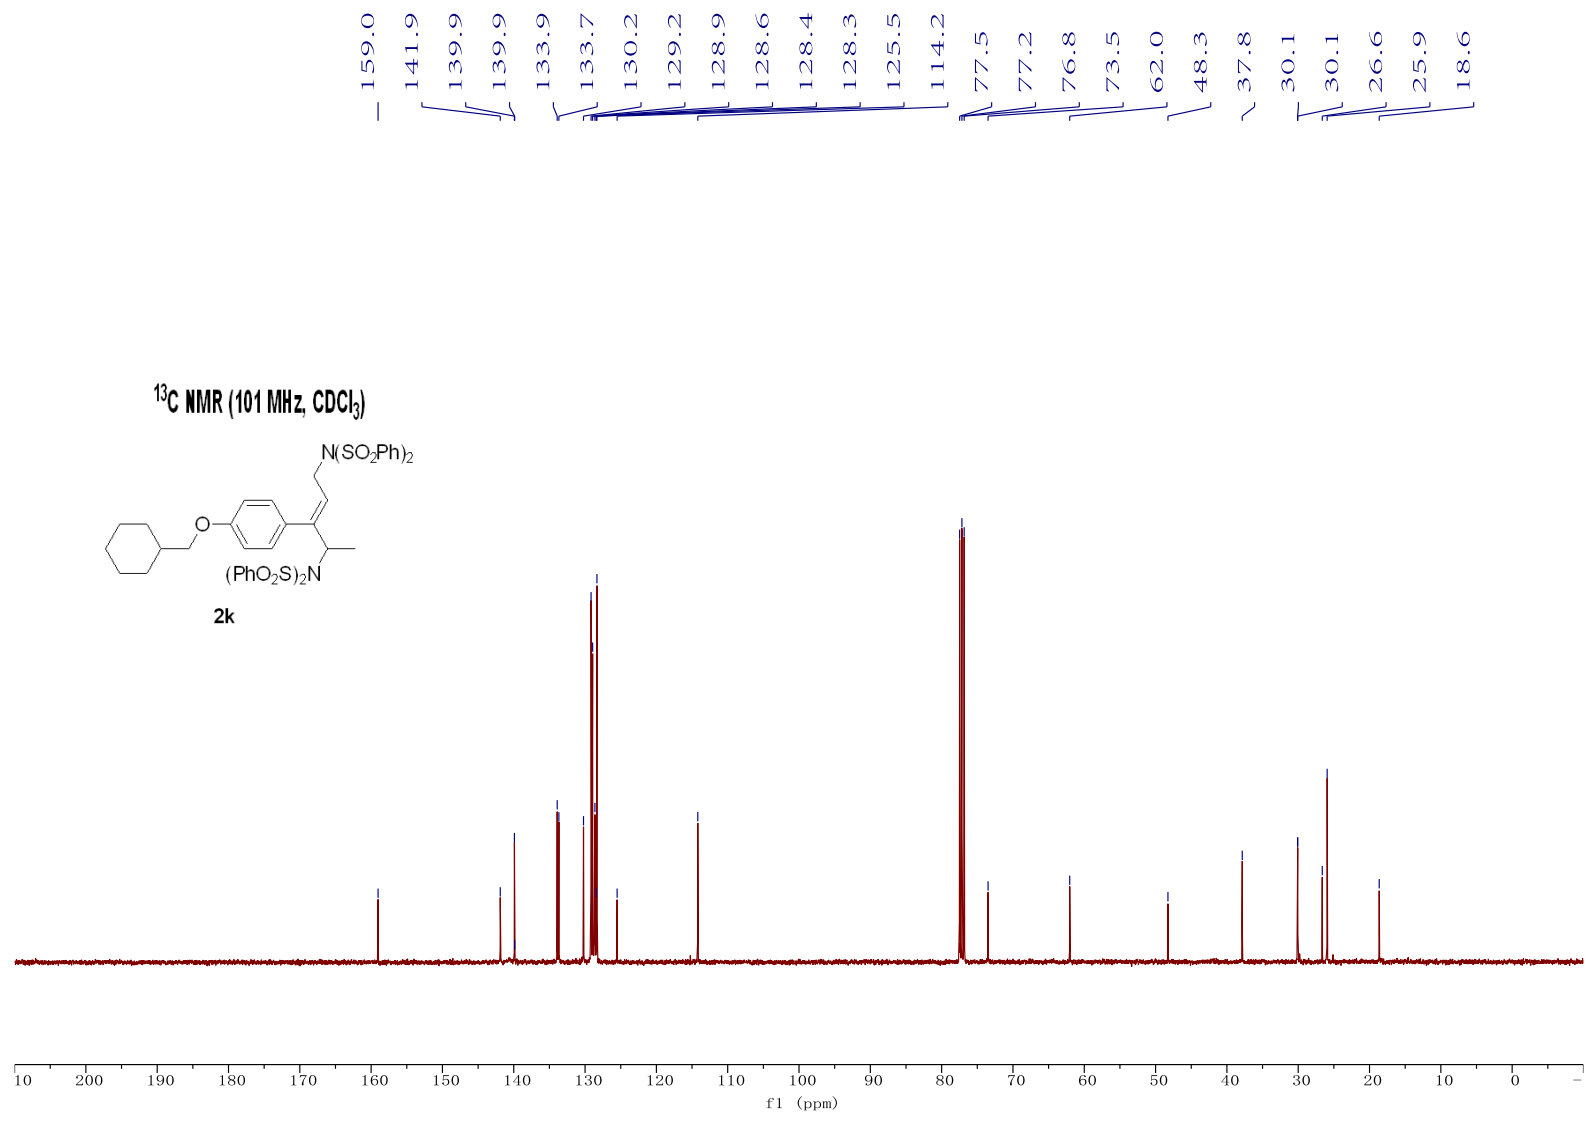



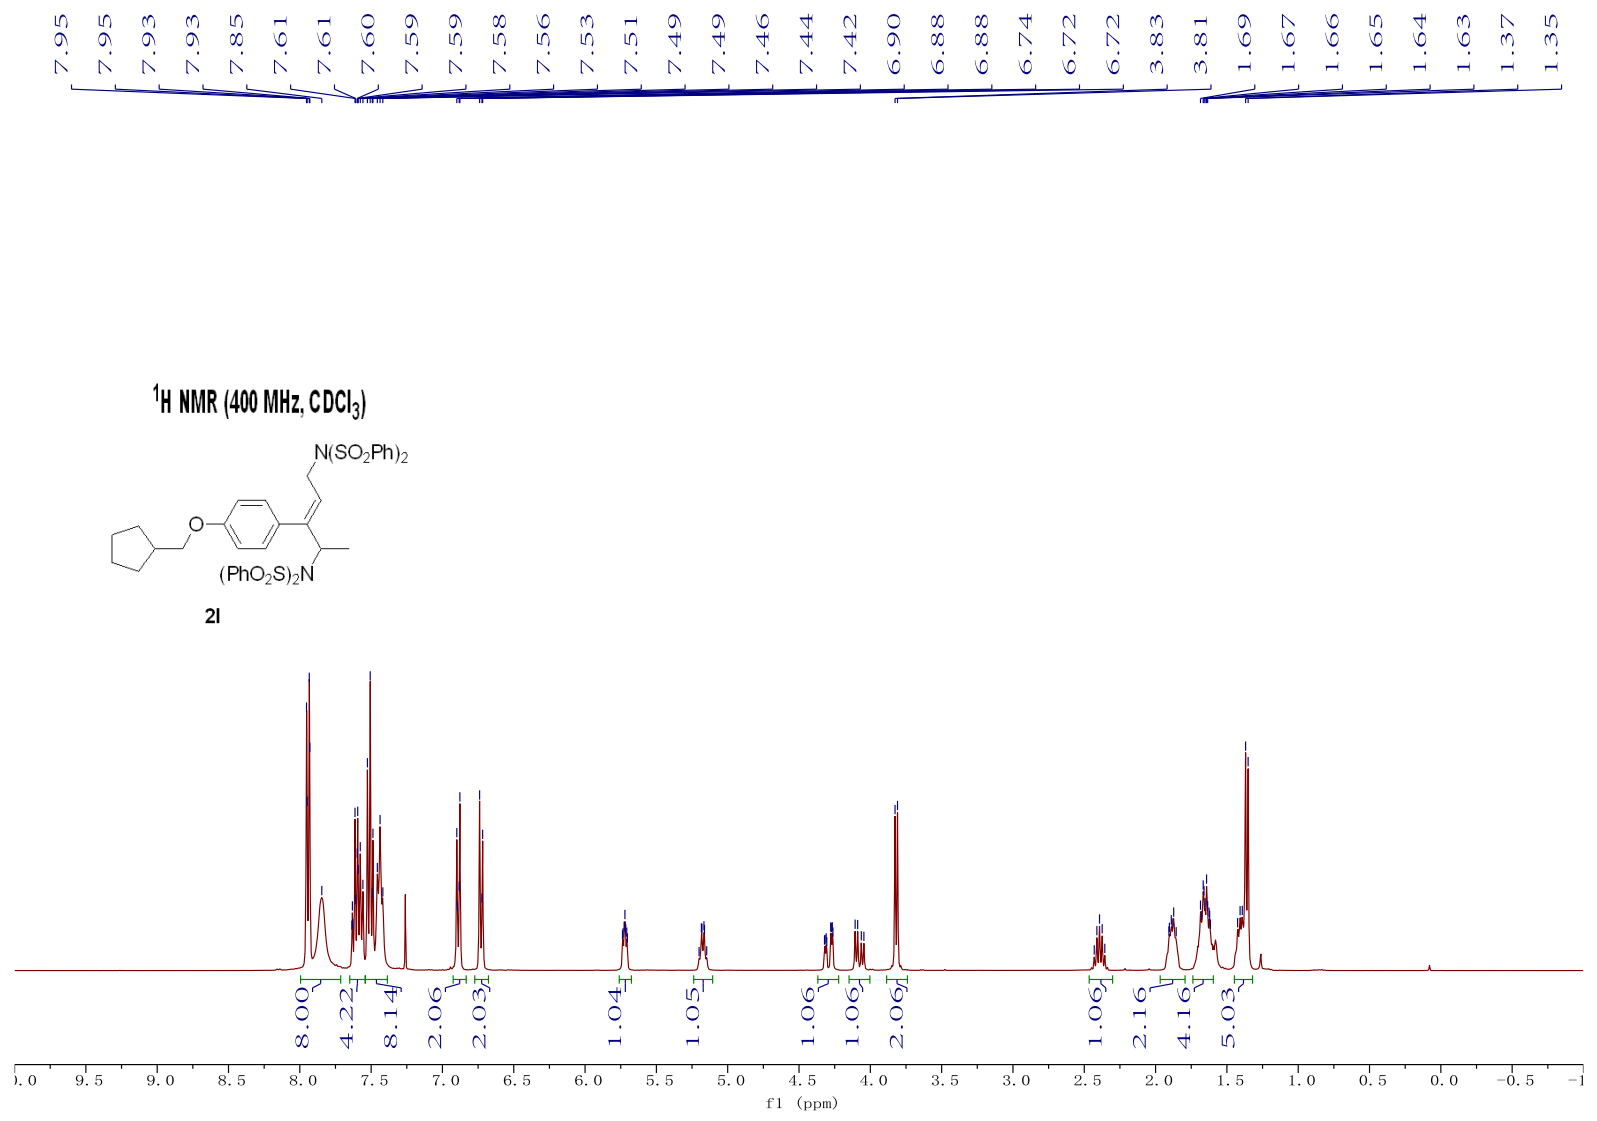

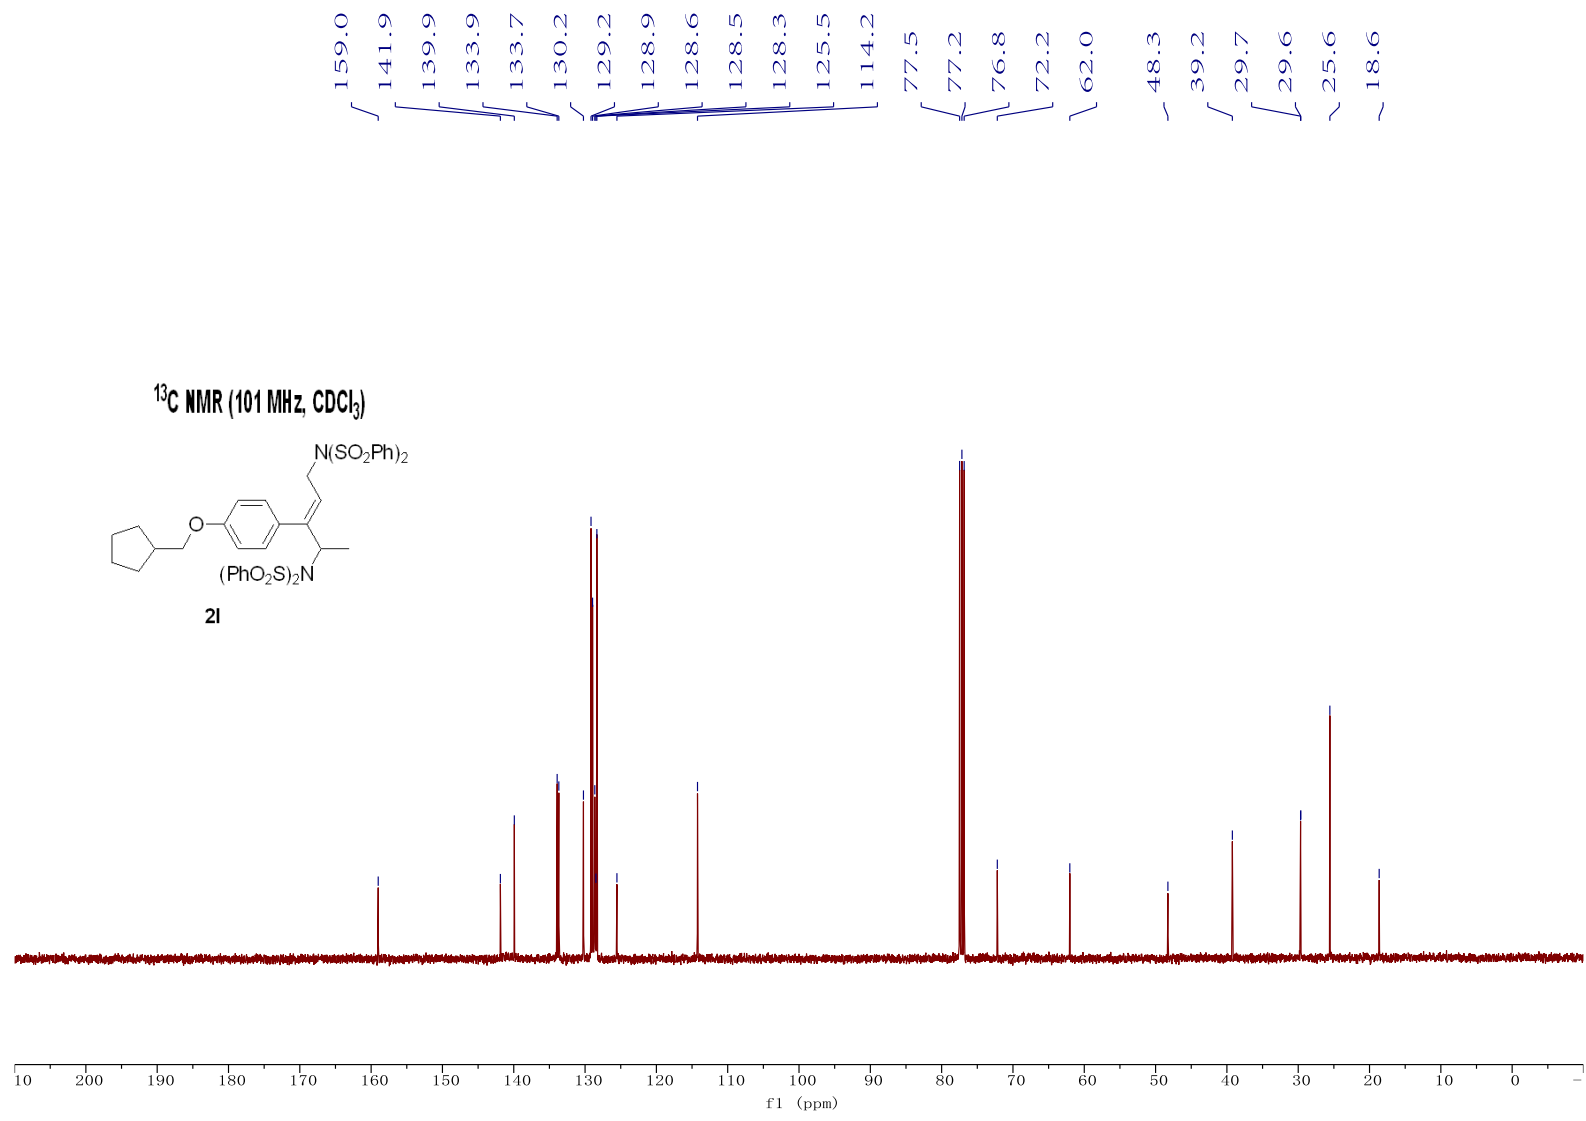

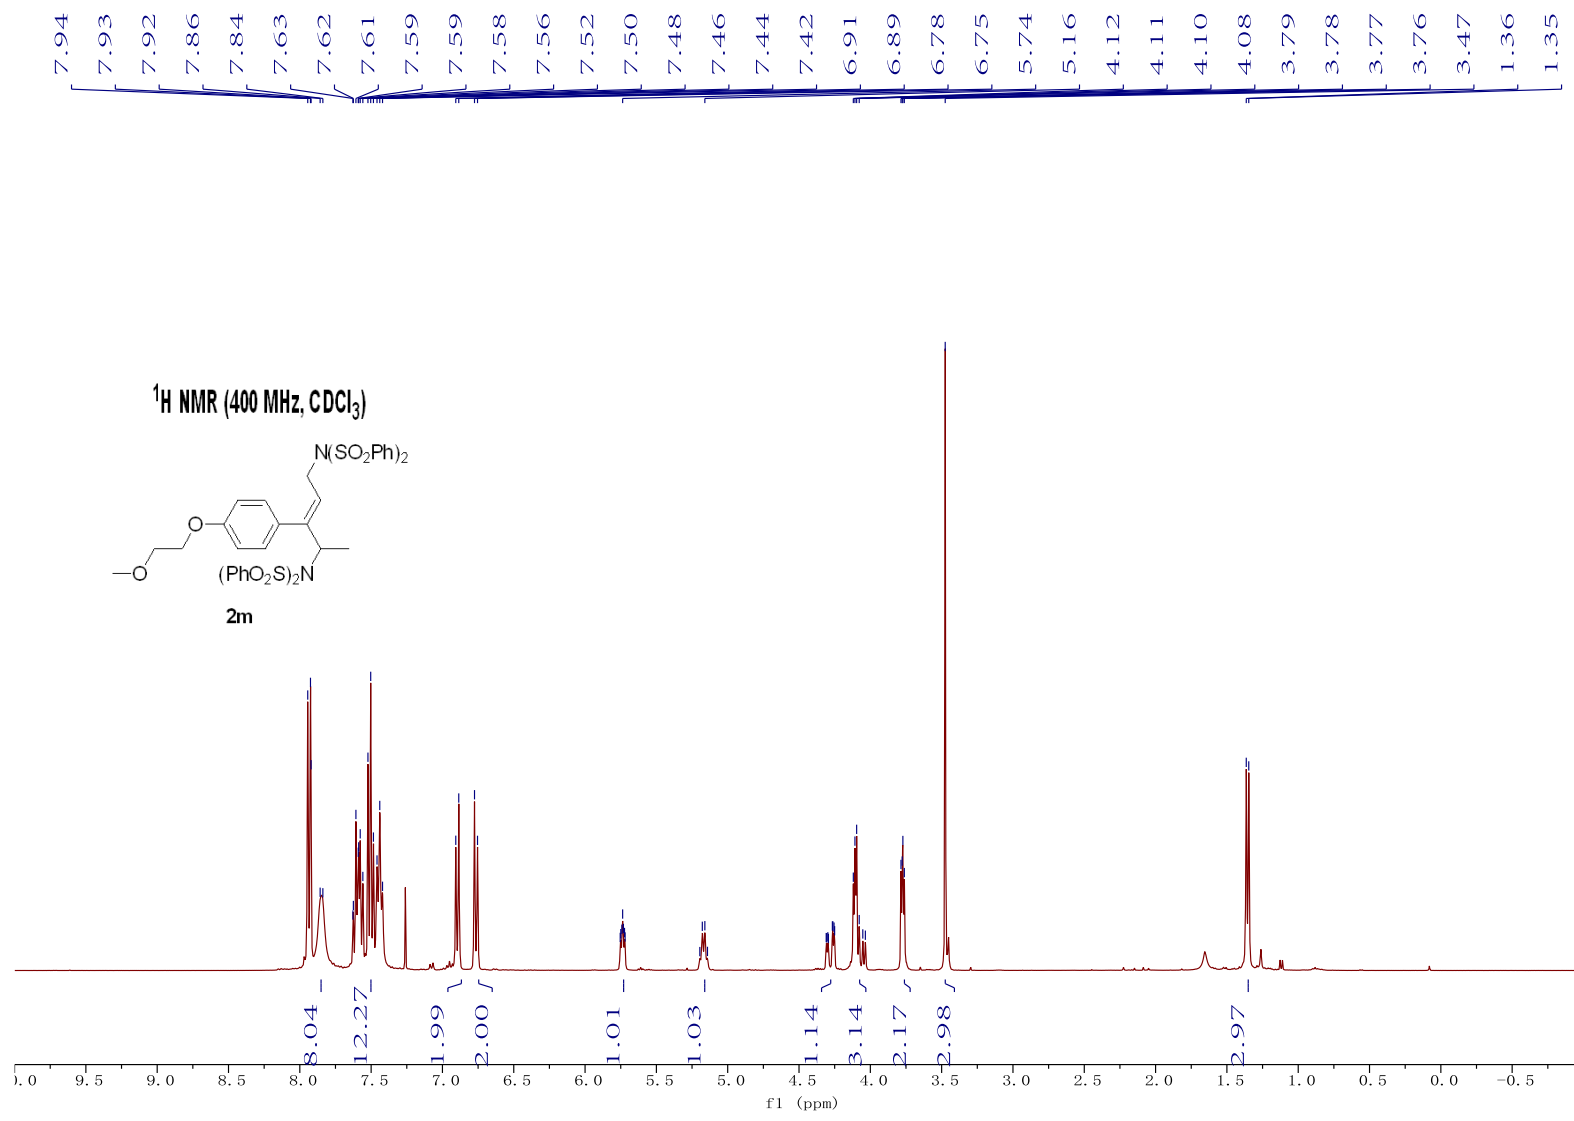

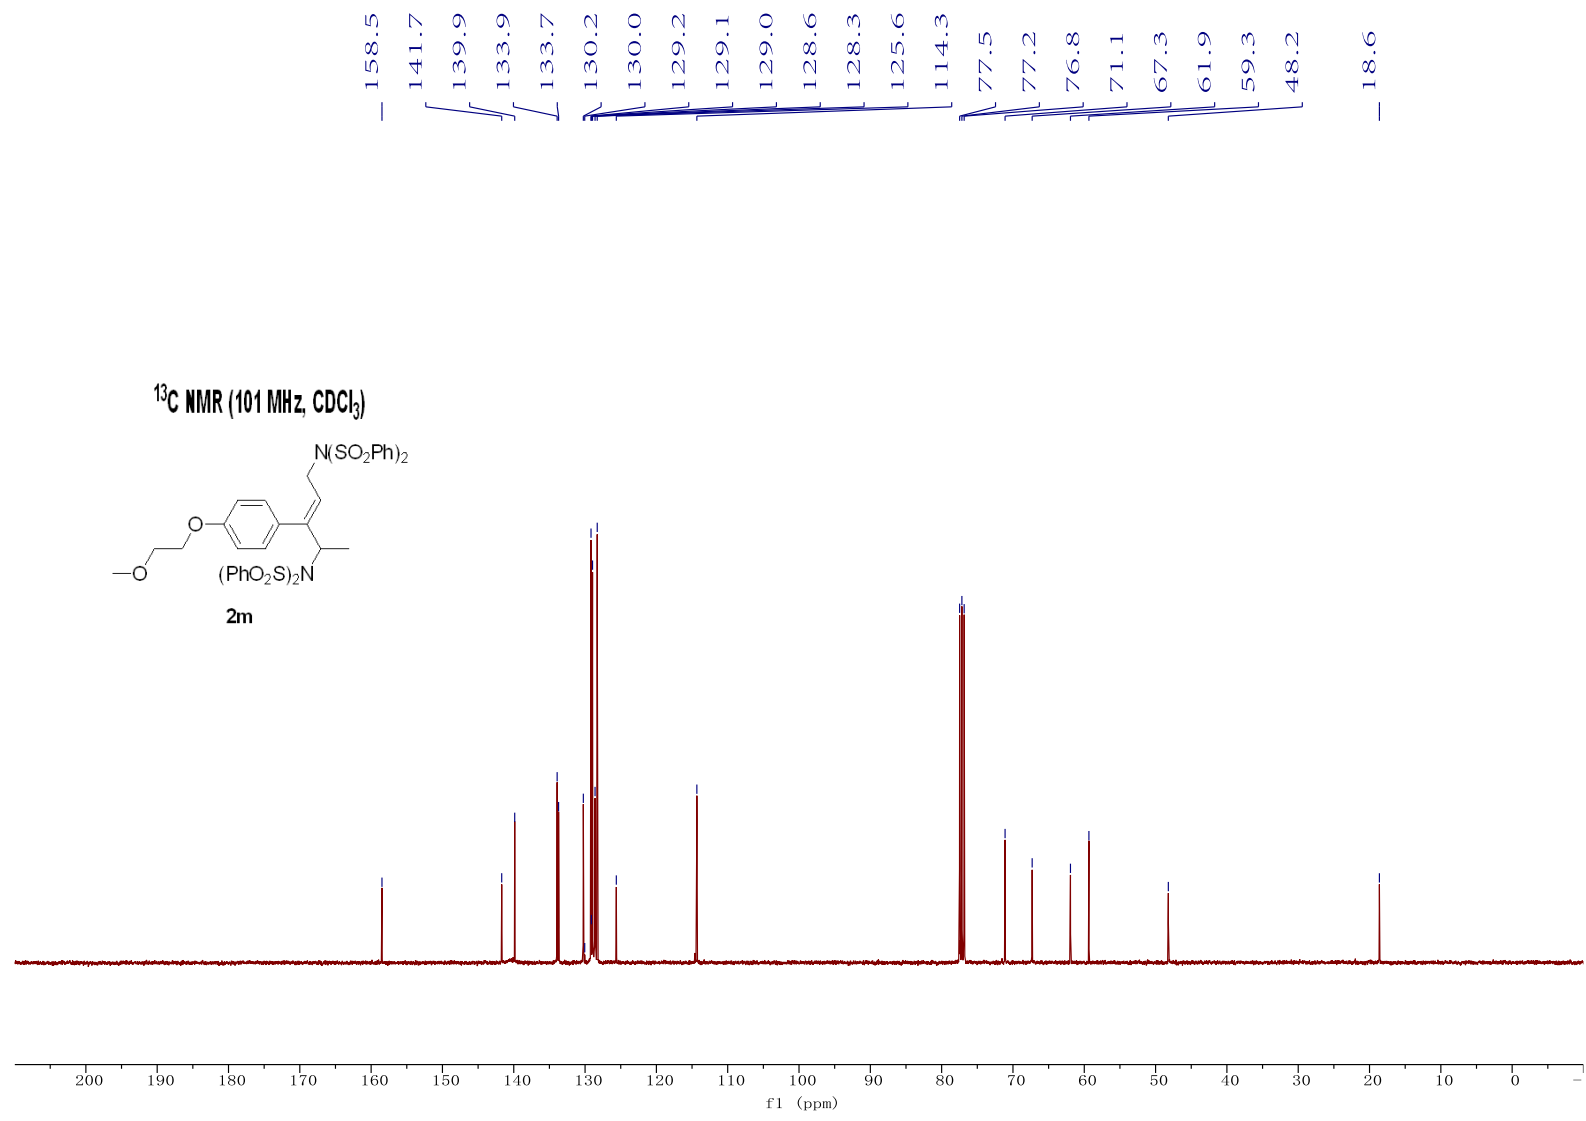

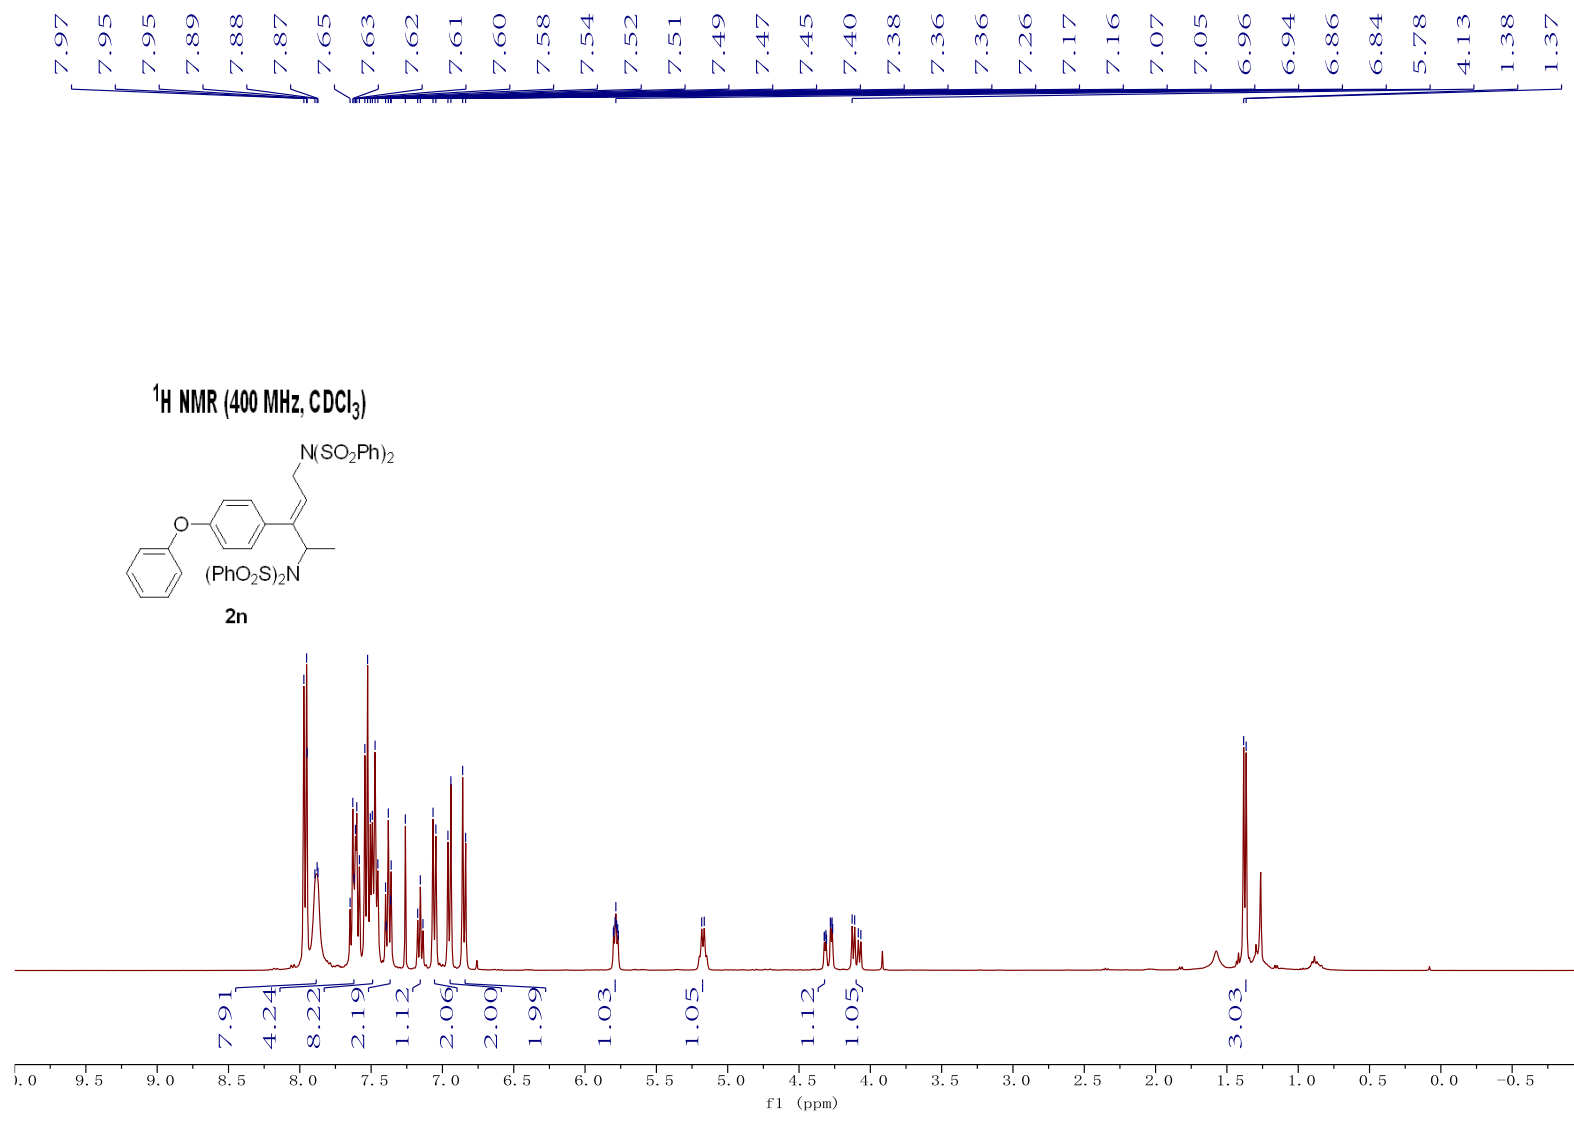

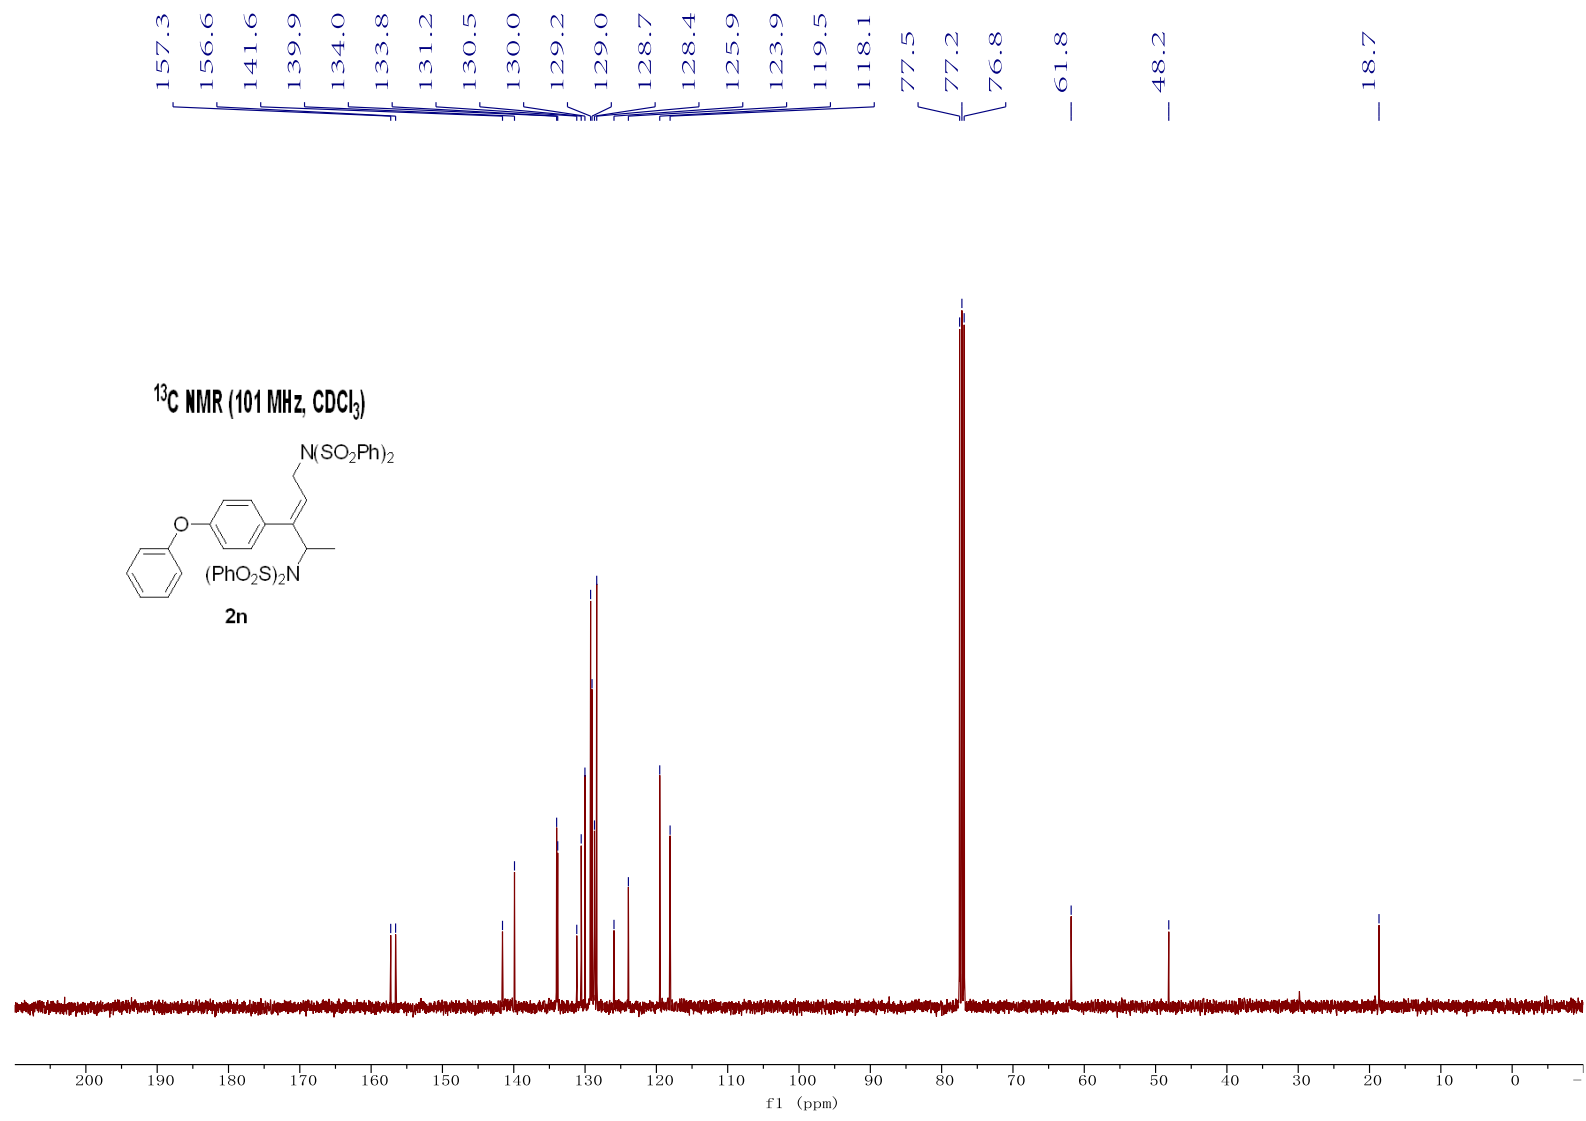

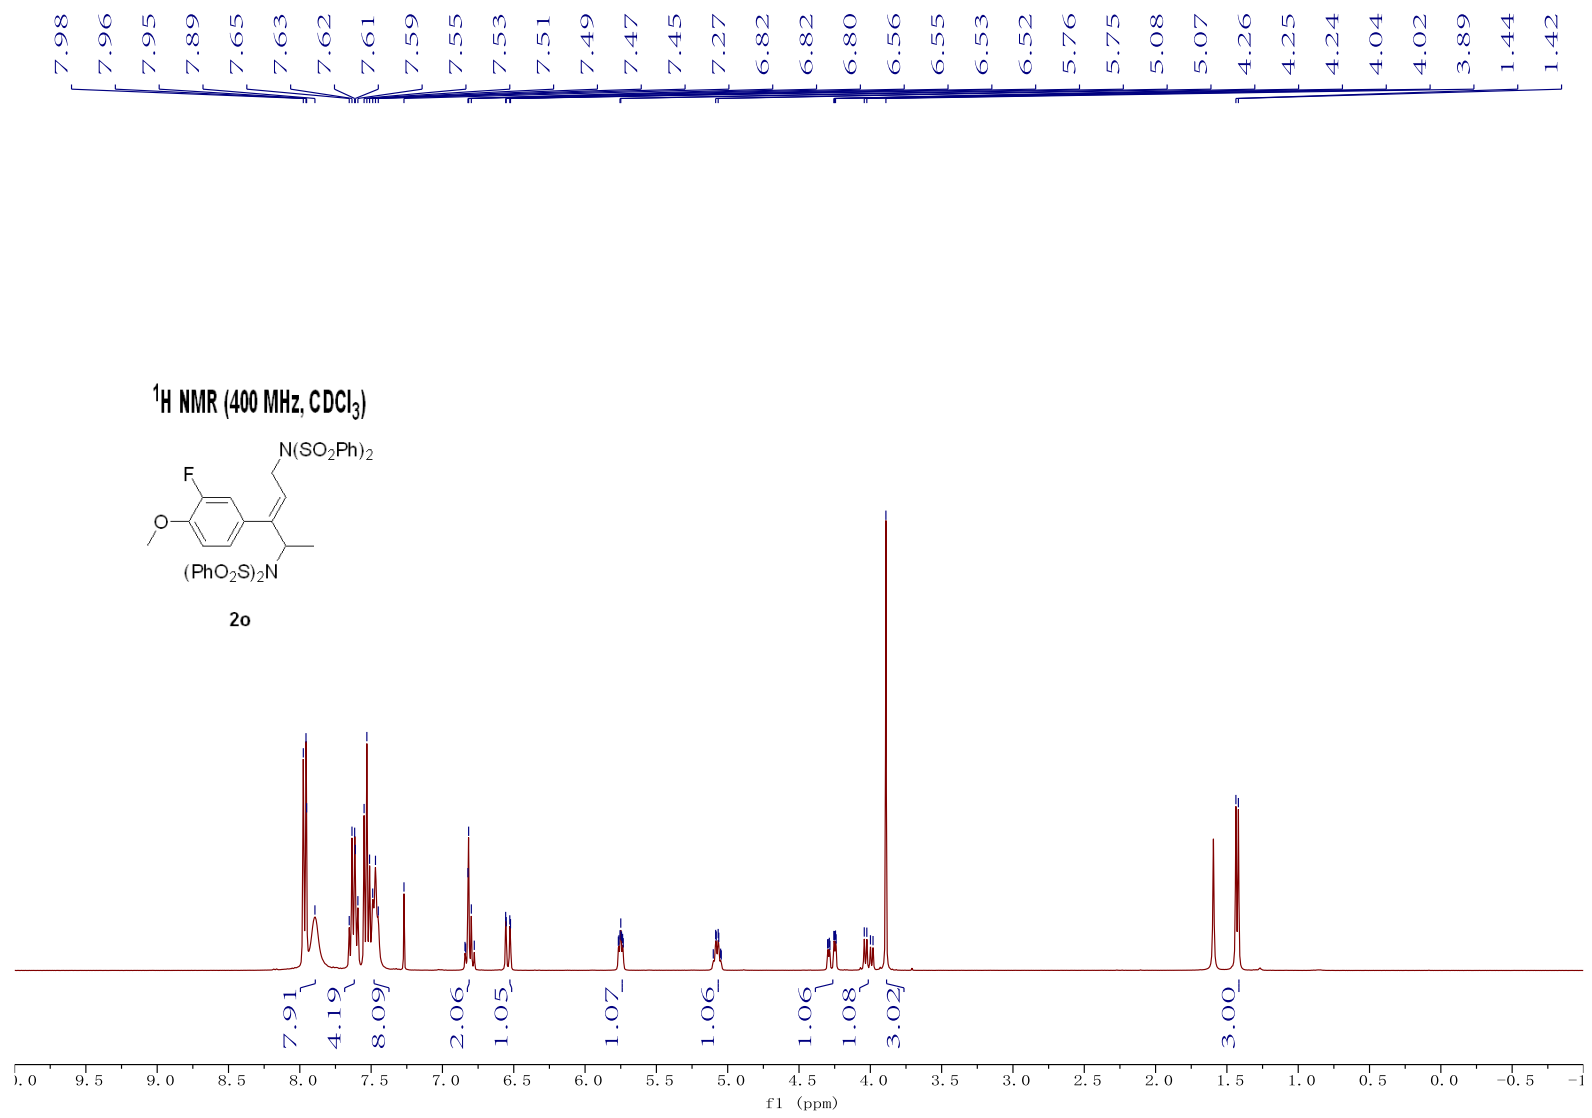

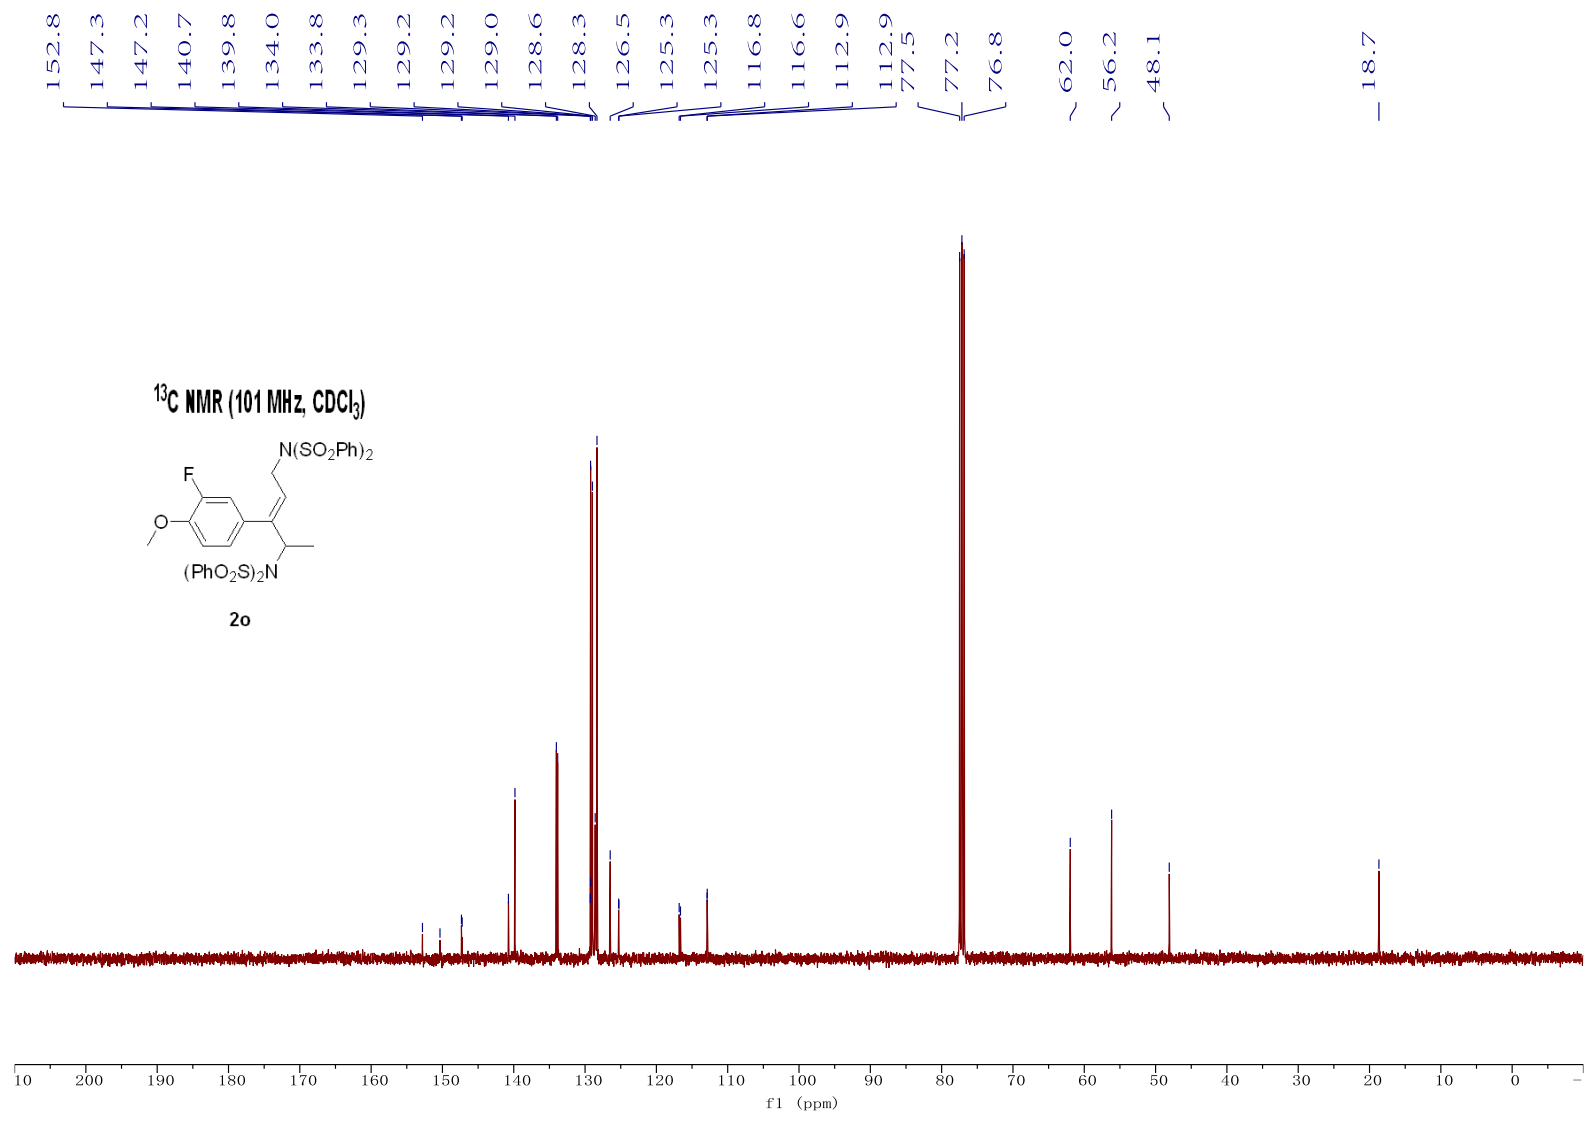



<sup>19</sup>F NMR (376 MHz, CDCl<sub>3</sub>)

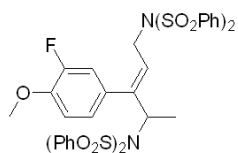

**2o**

-134.1

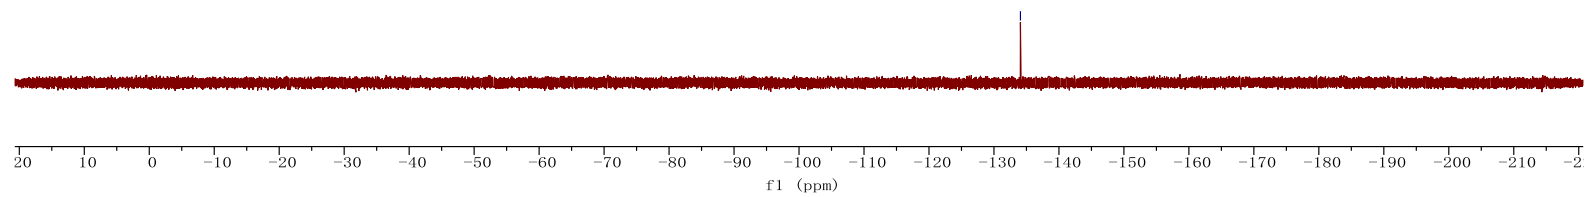

S249

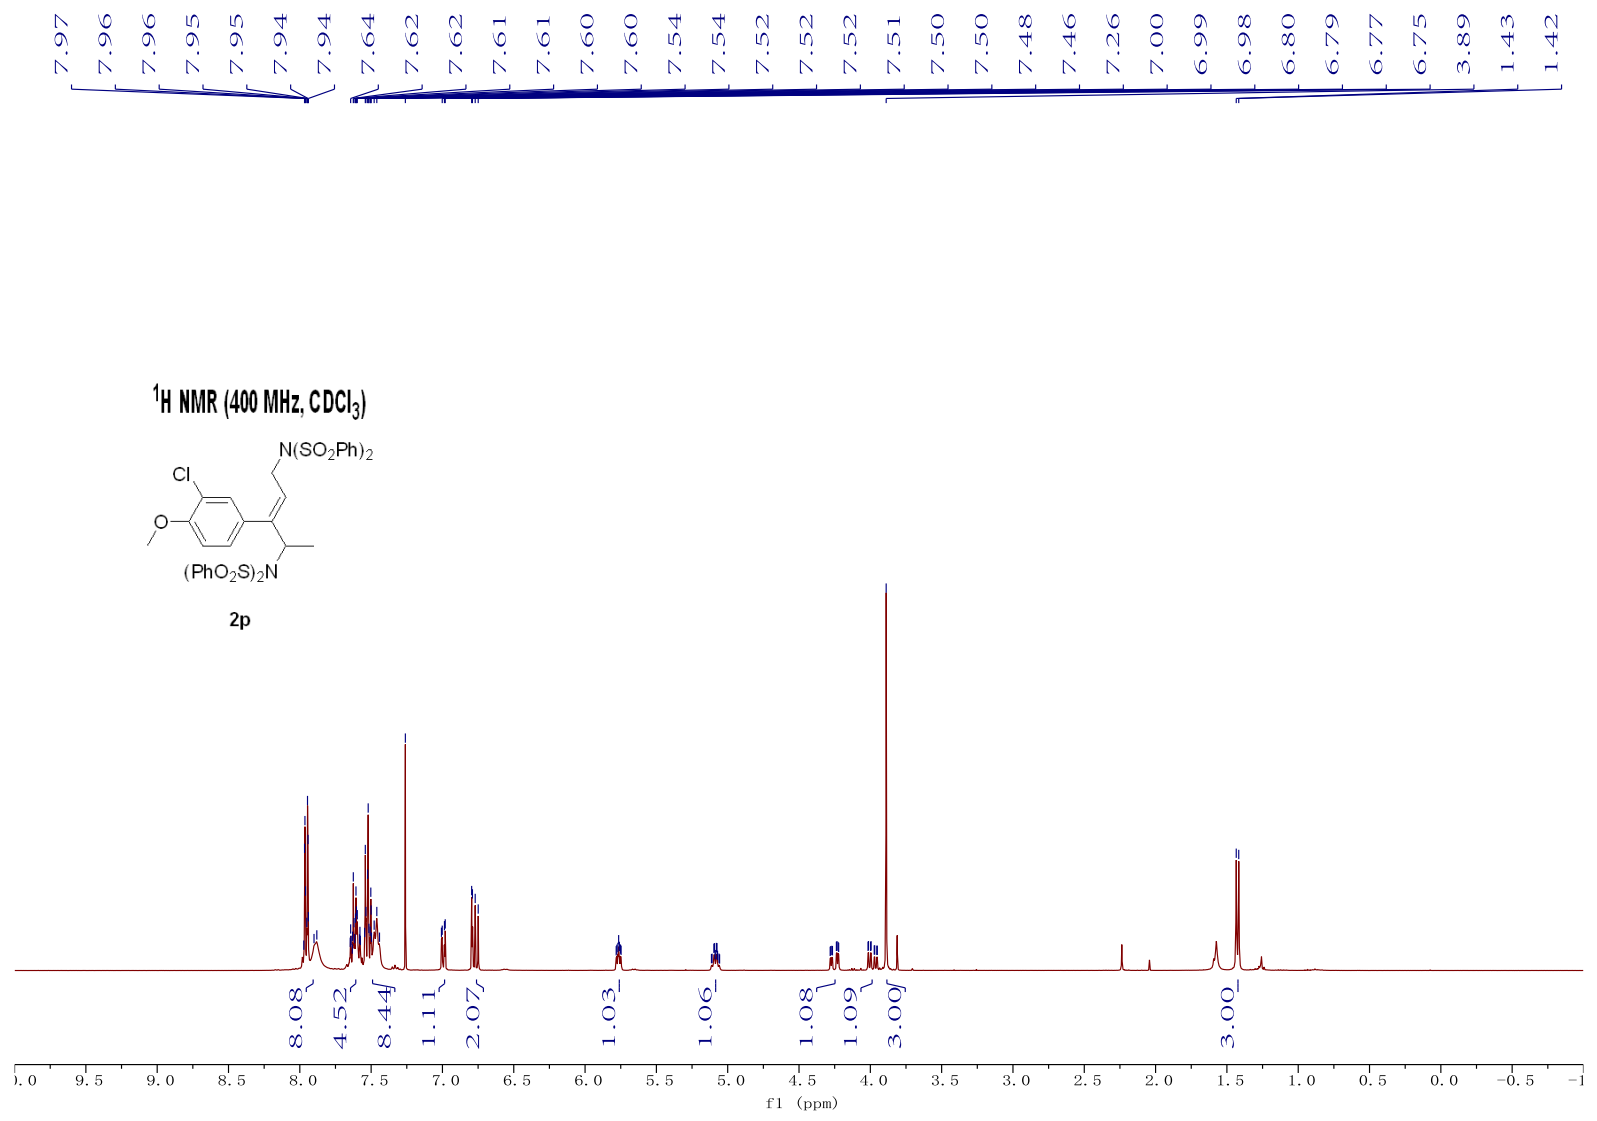

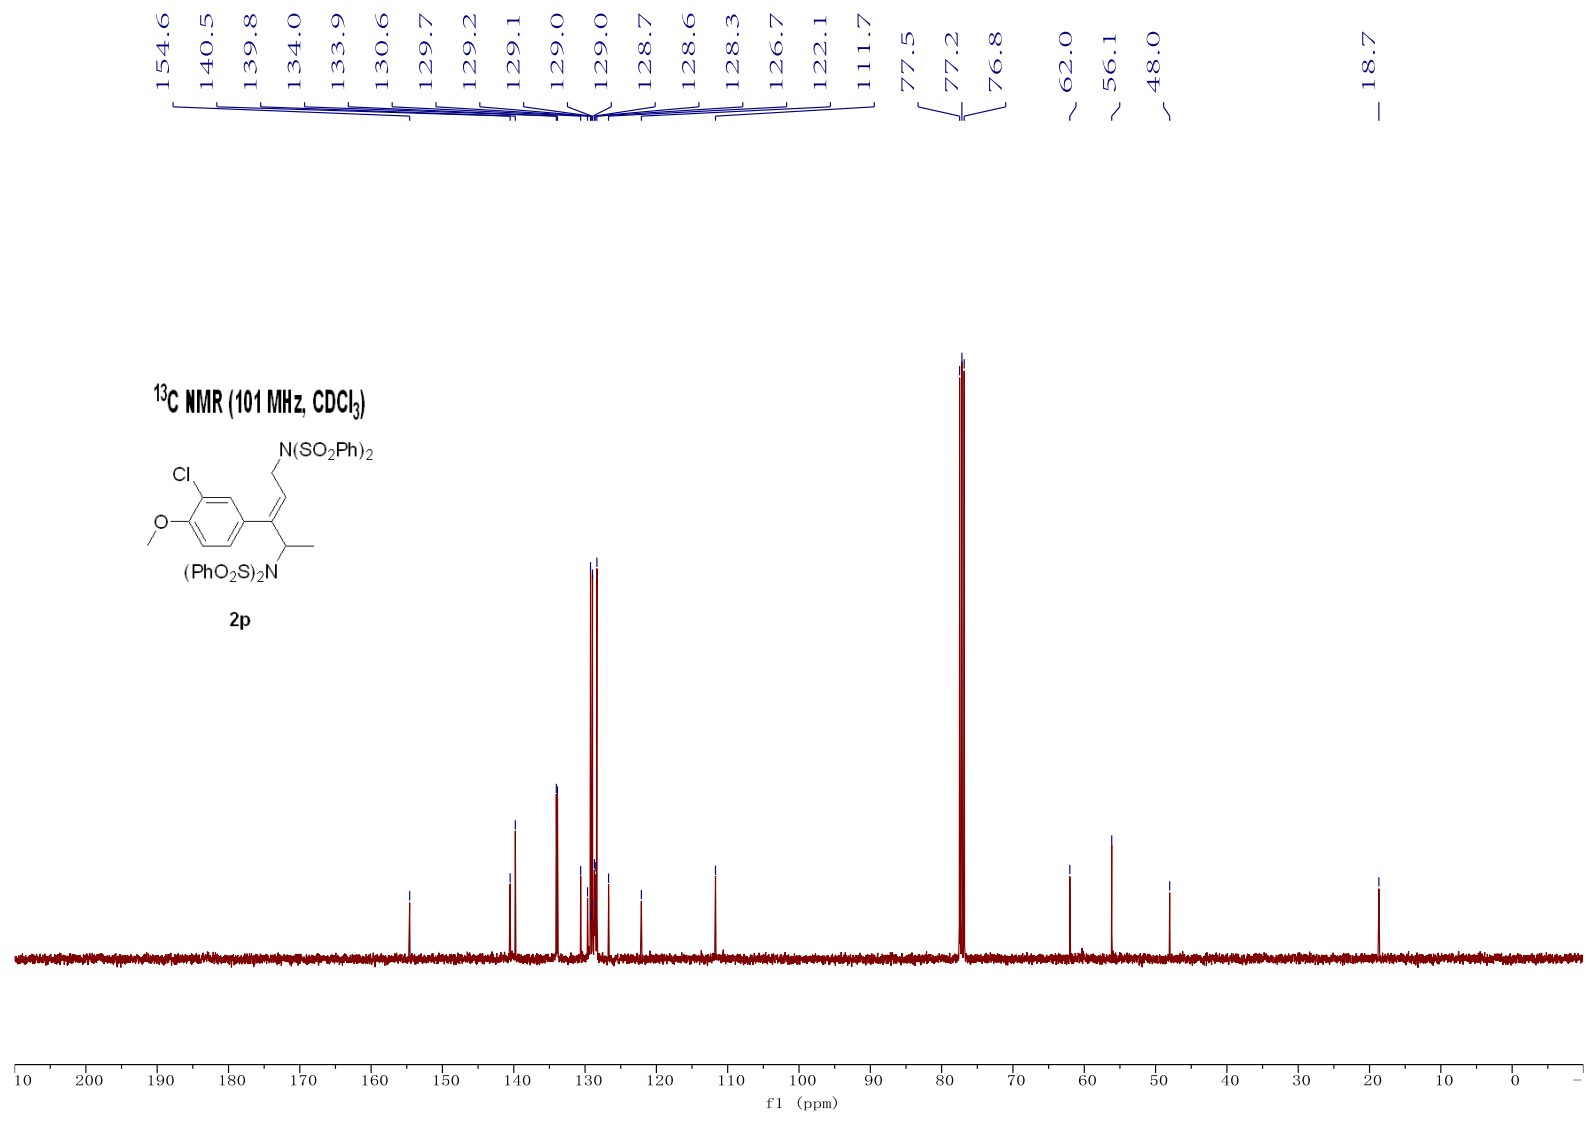

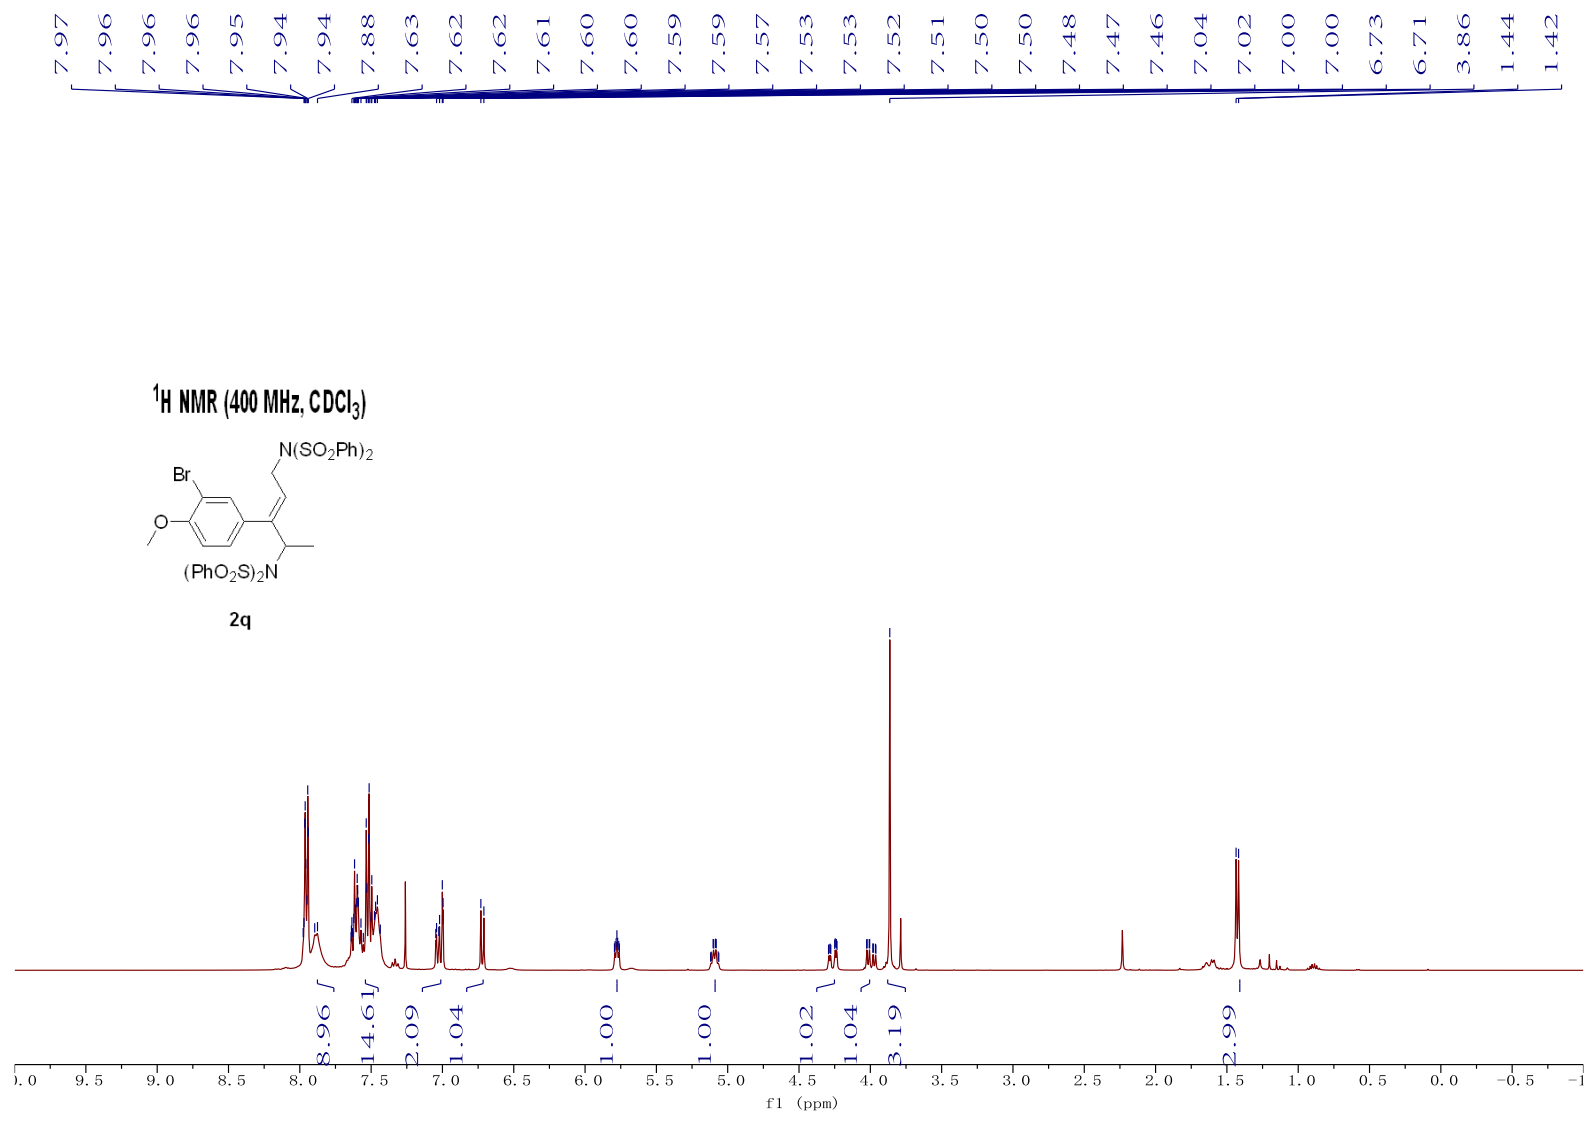

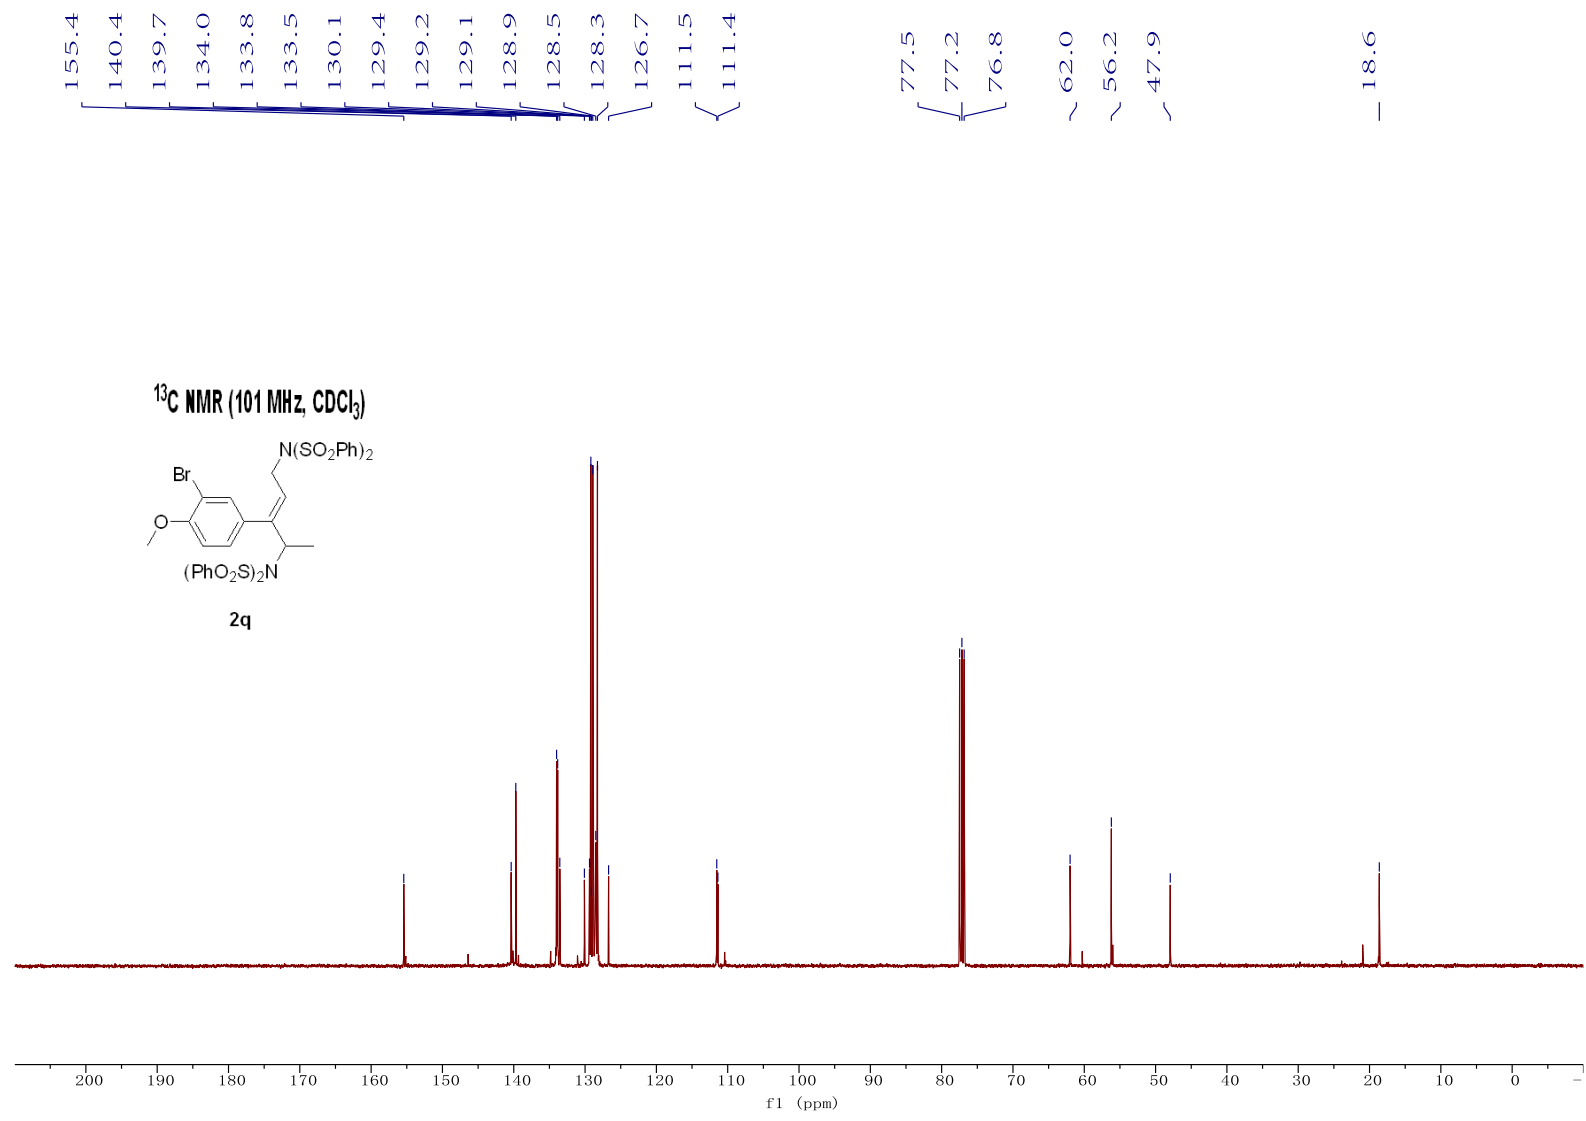

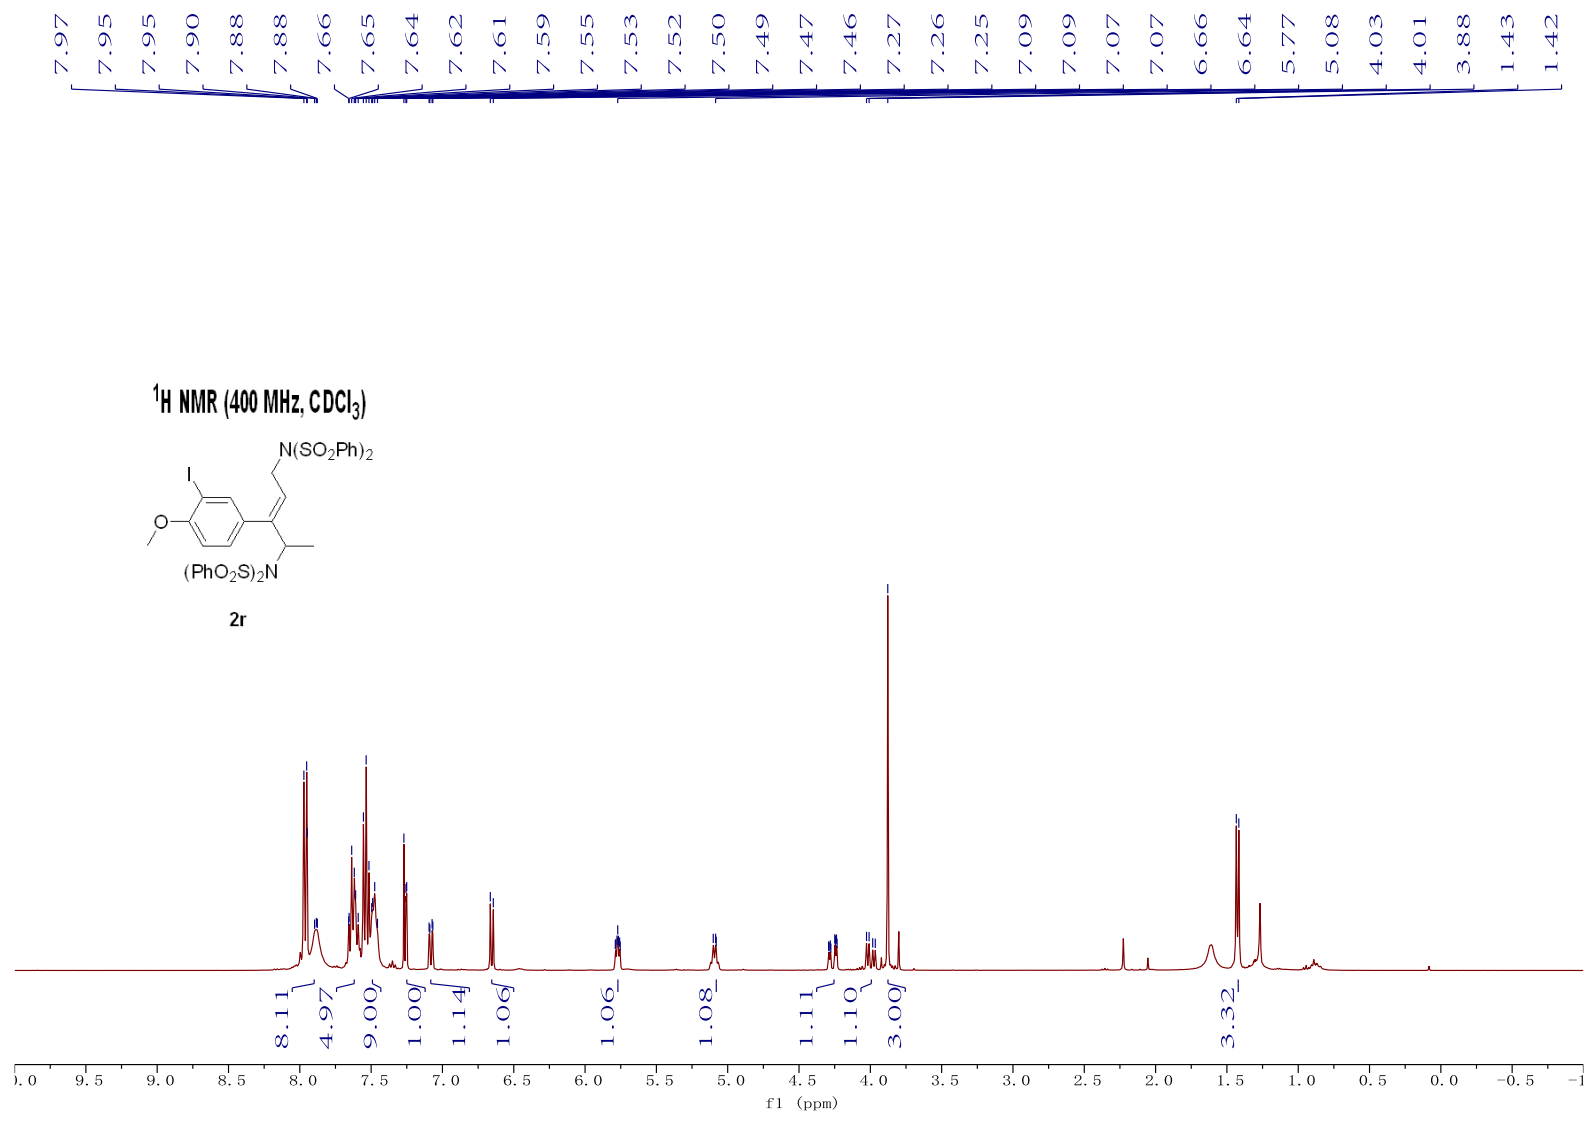

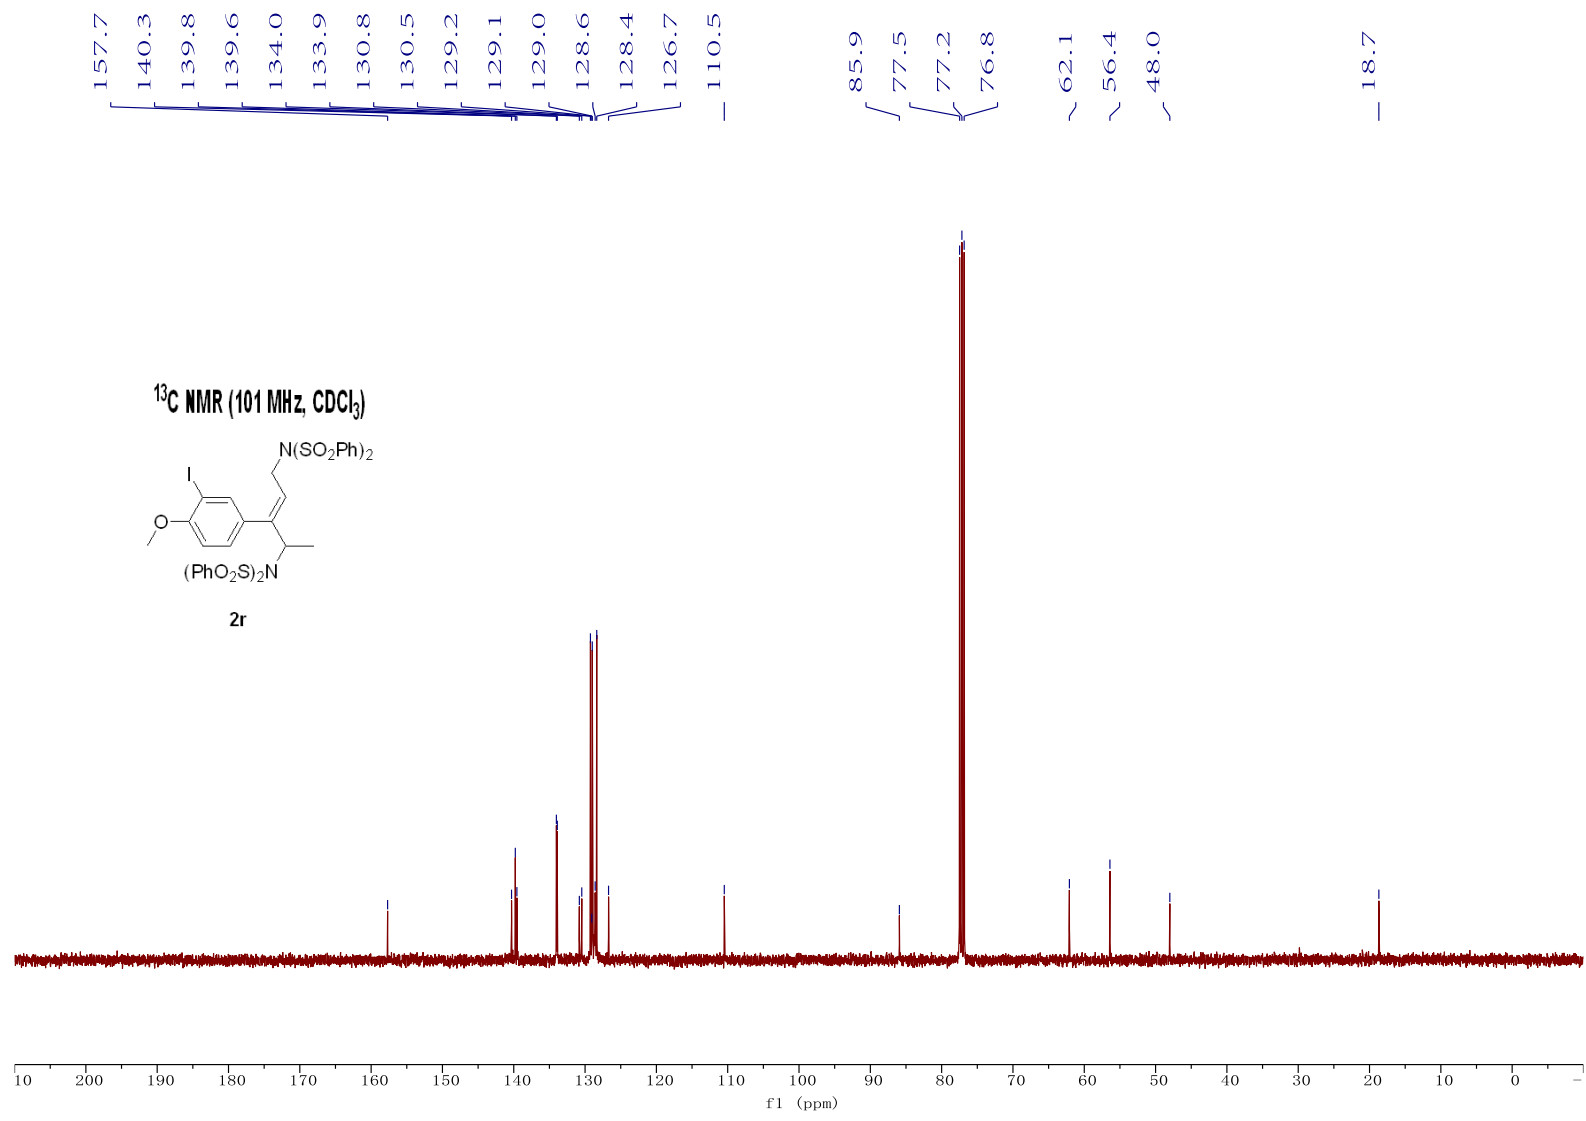

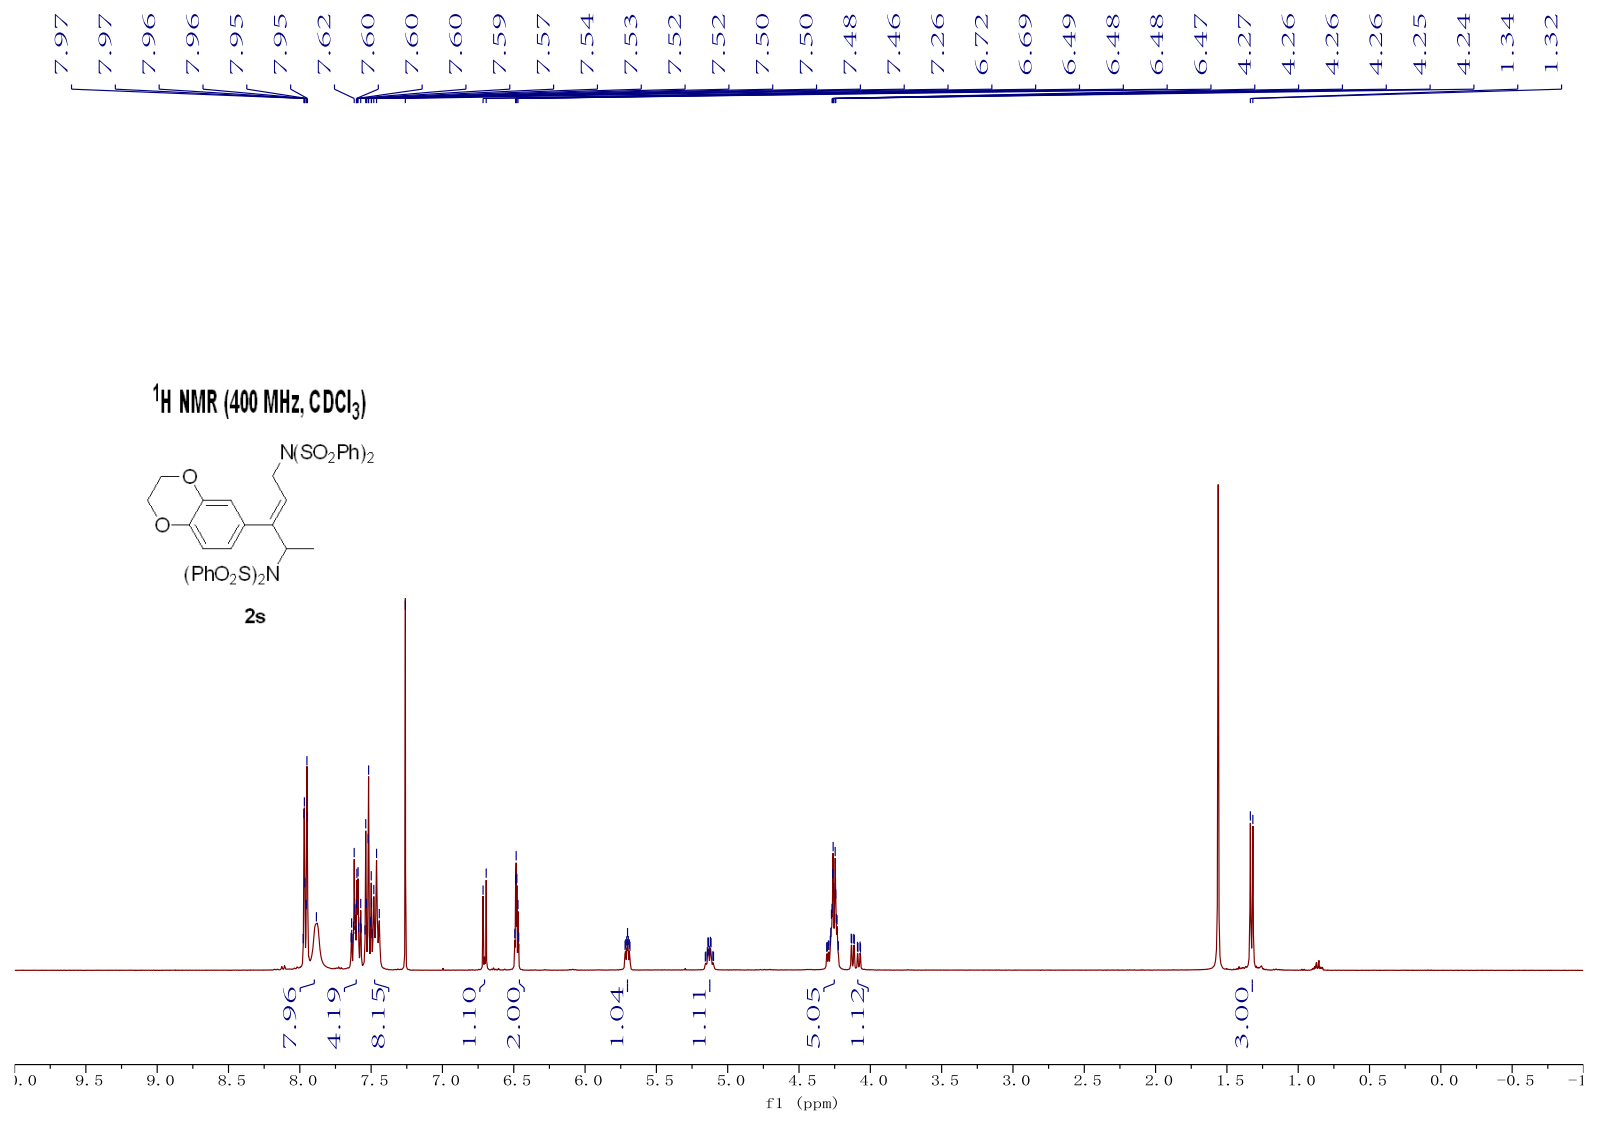



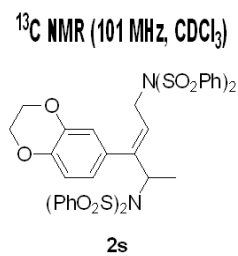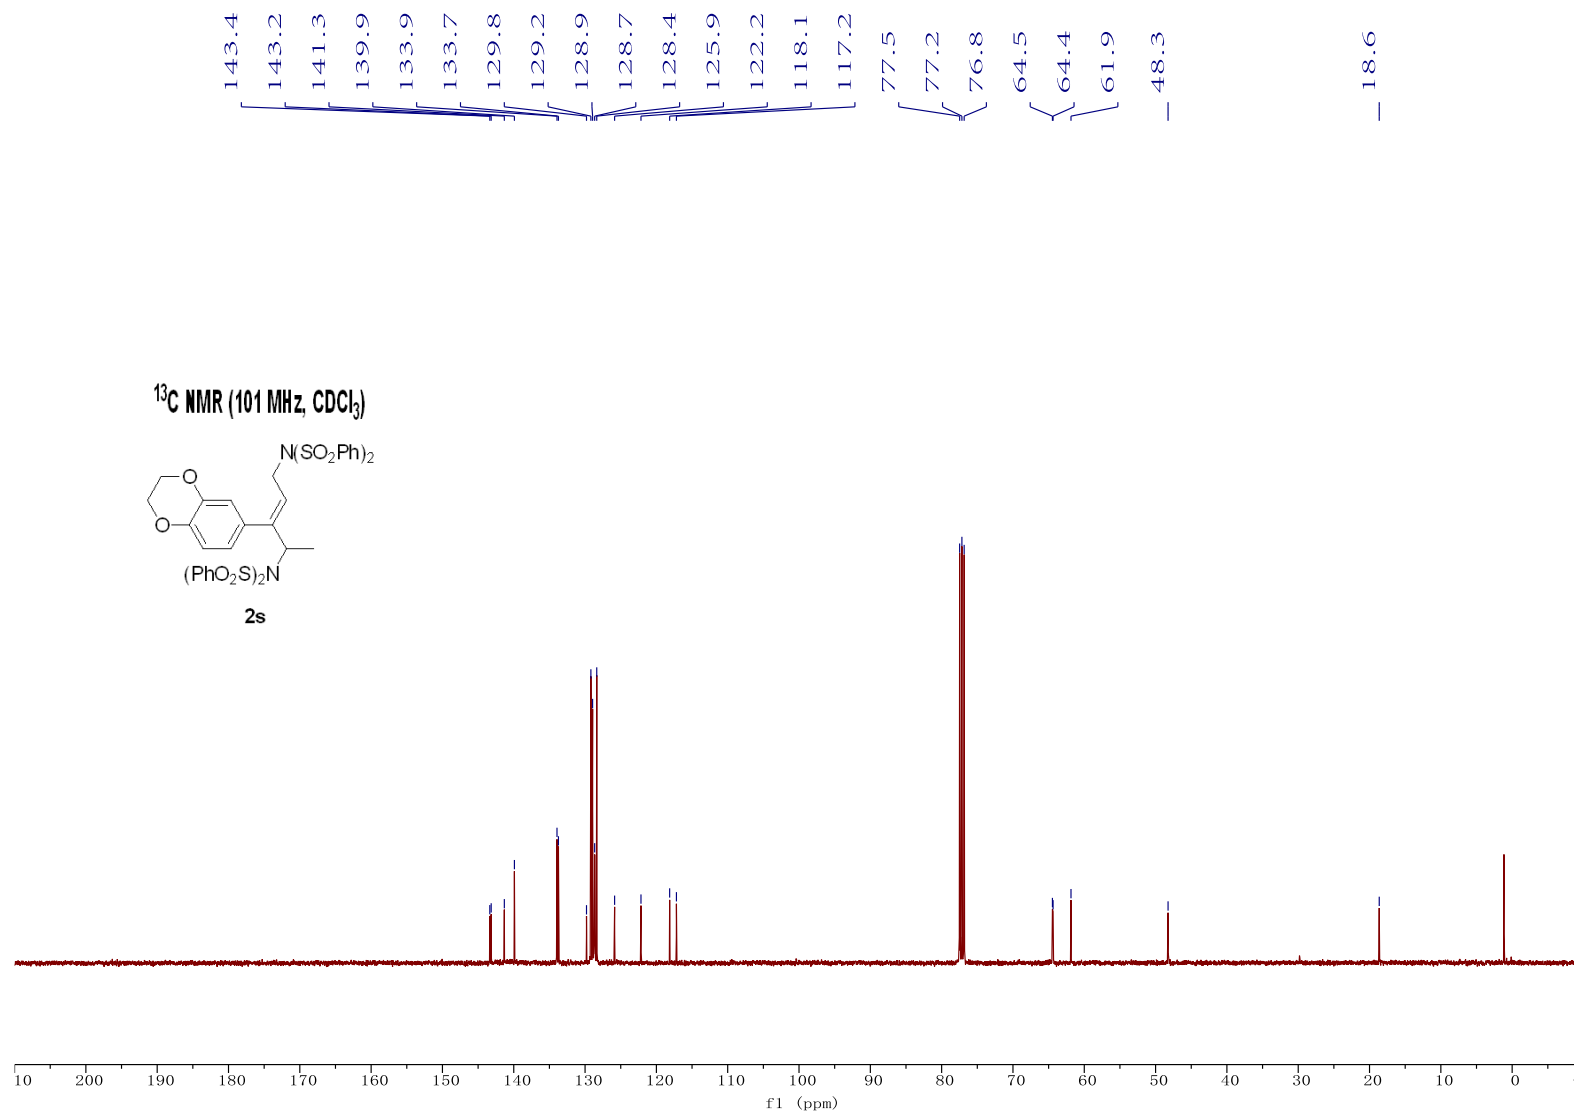

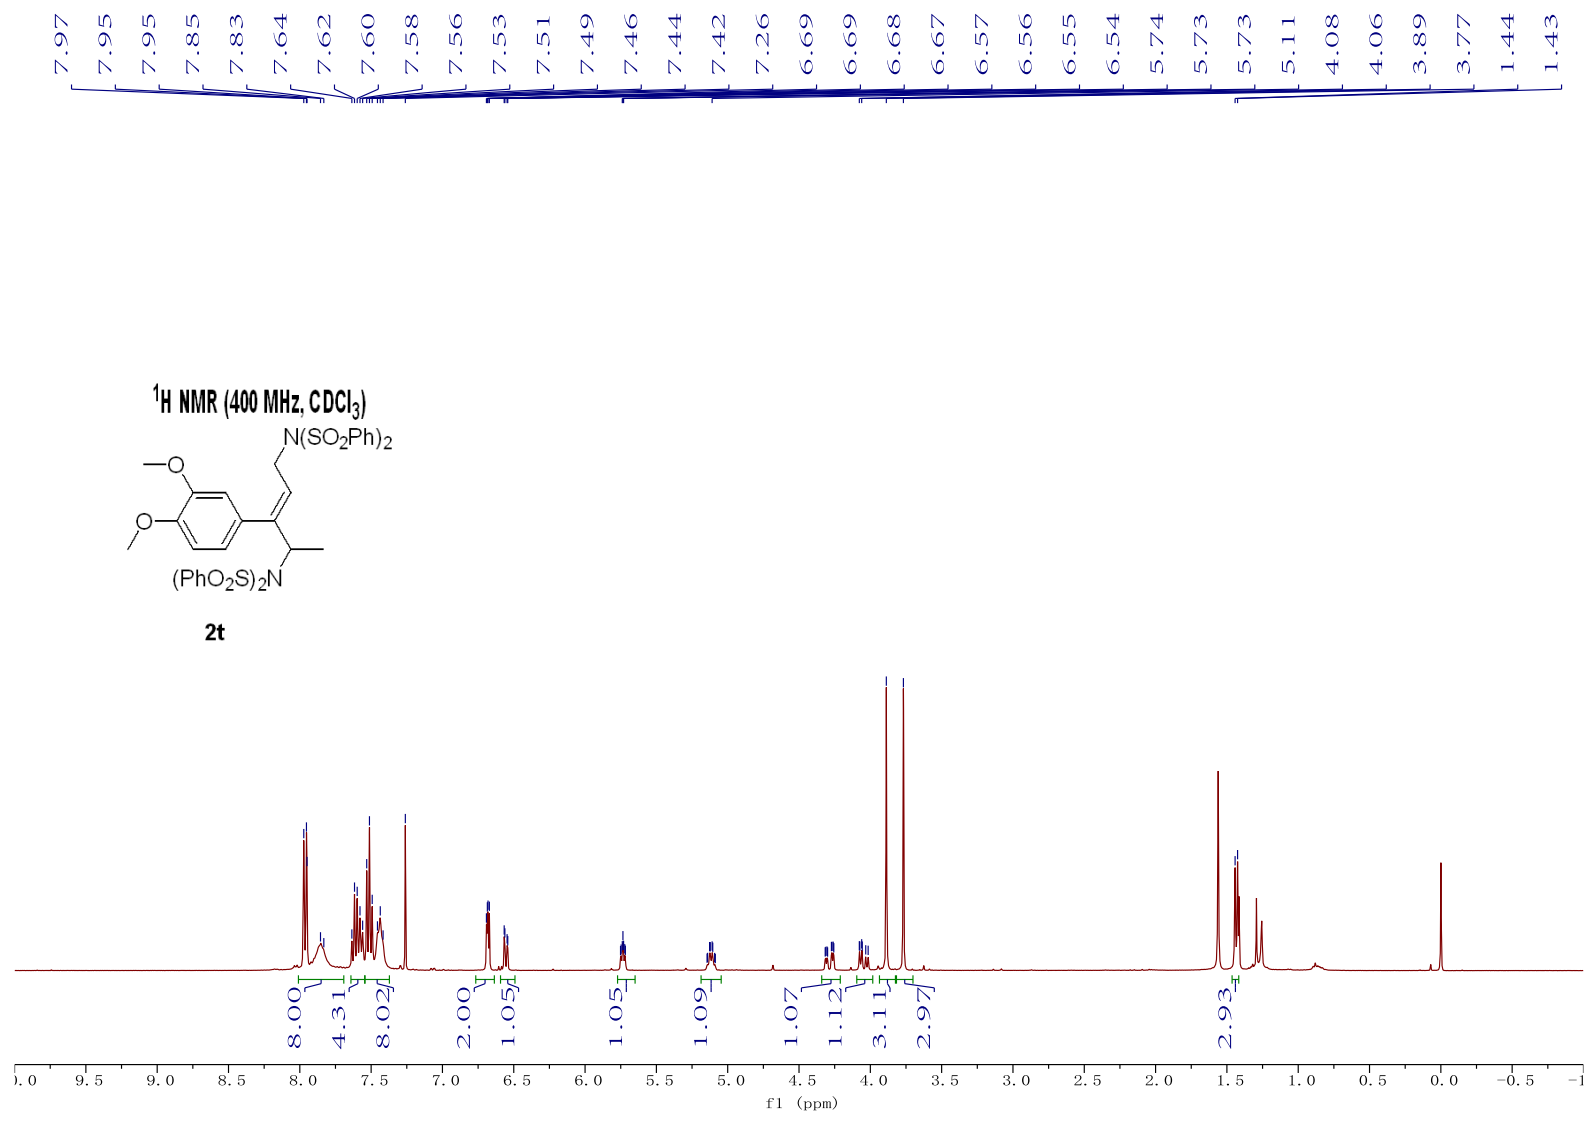

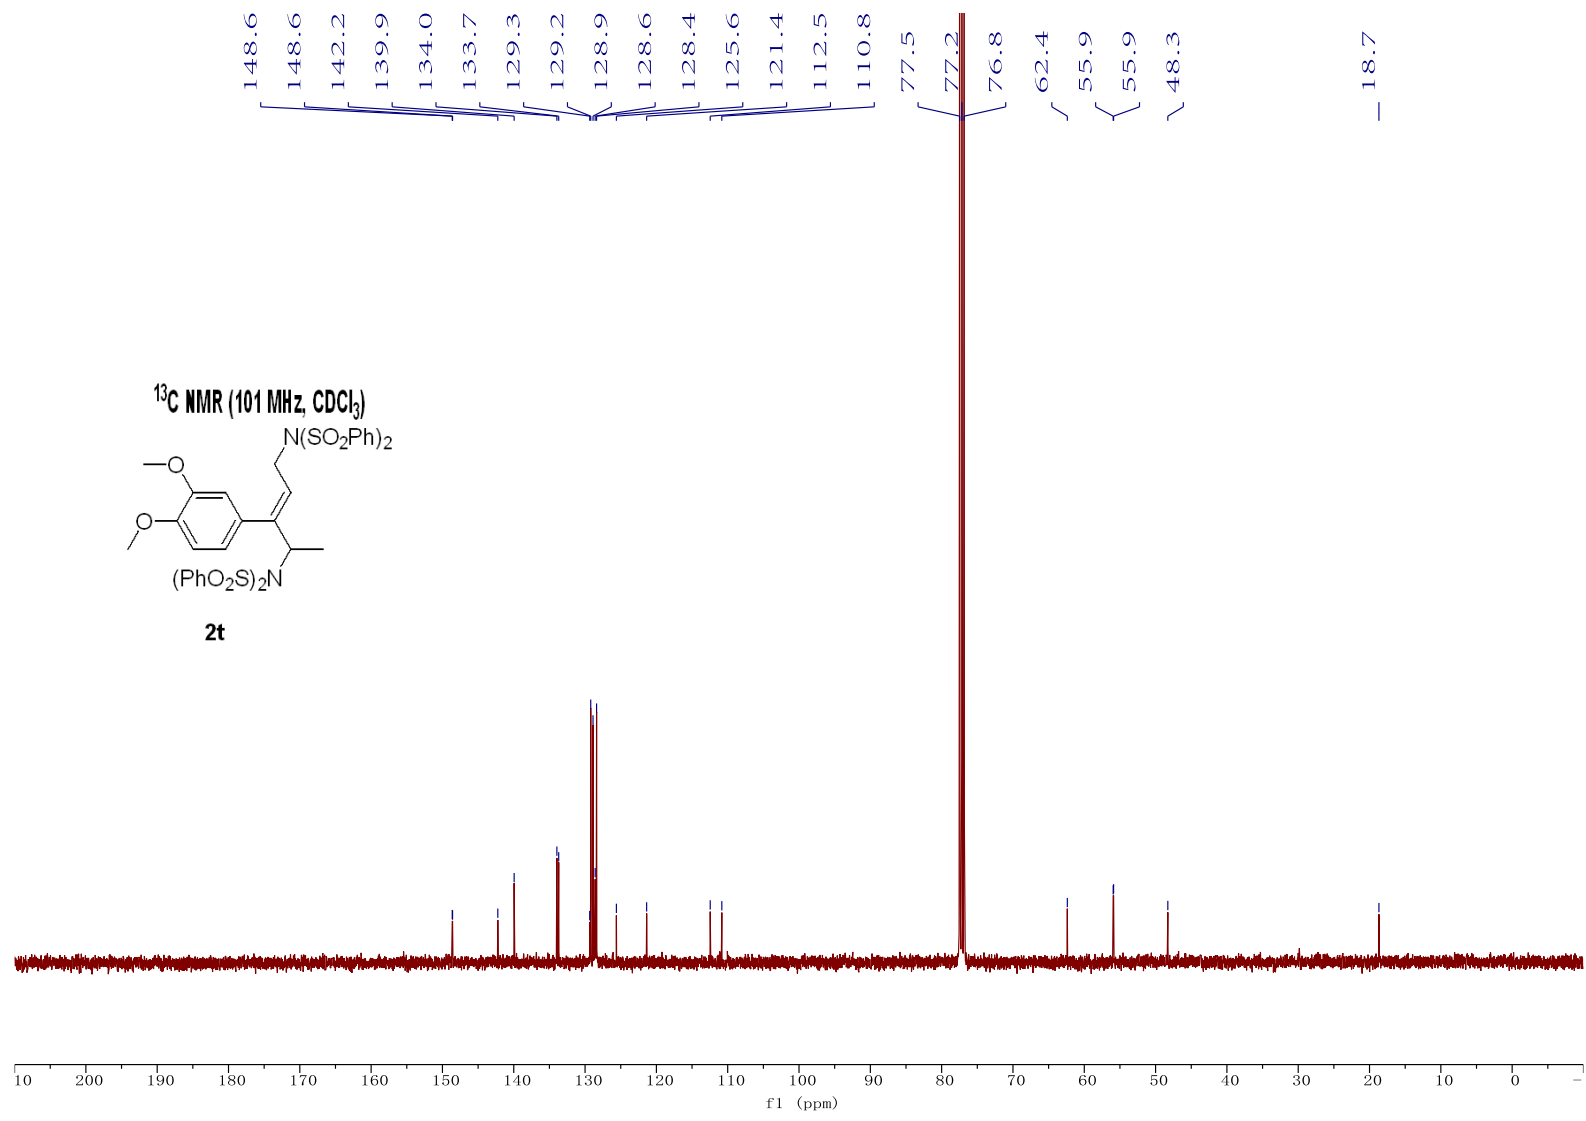

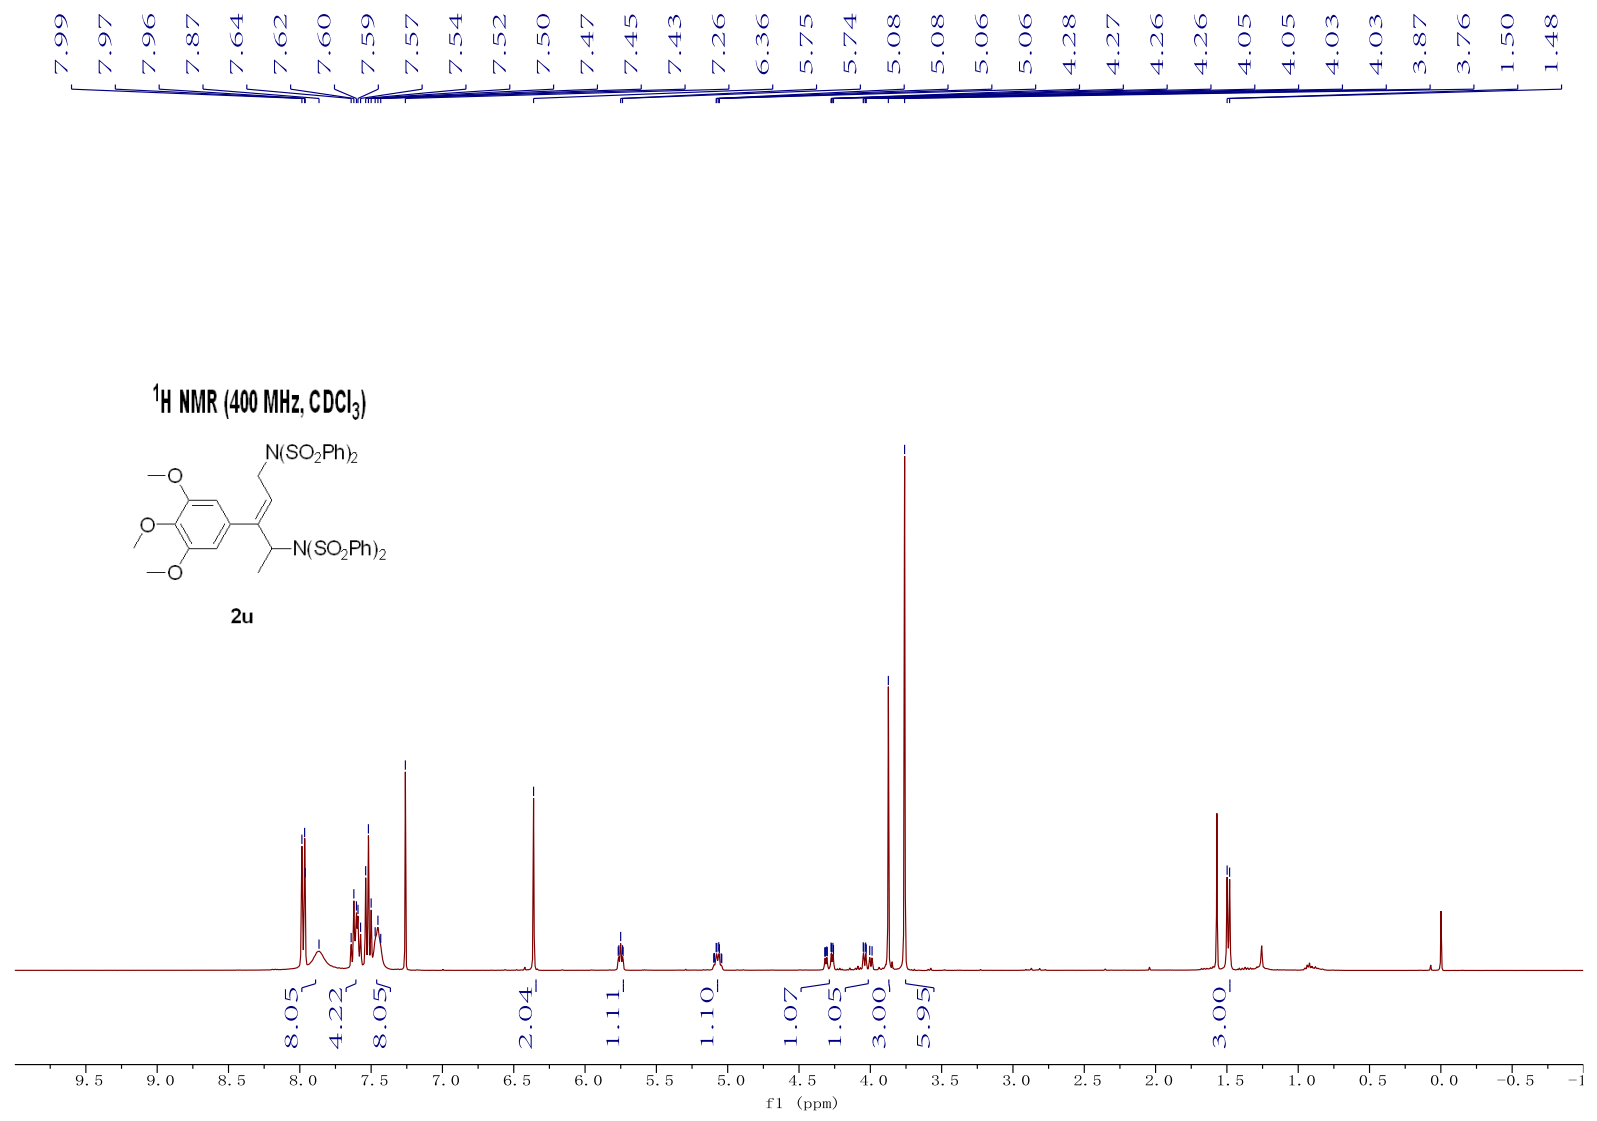

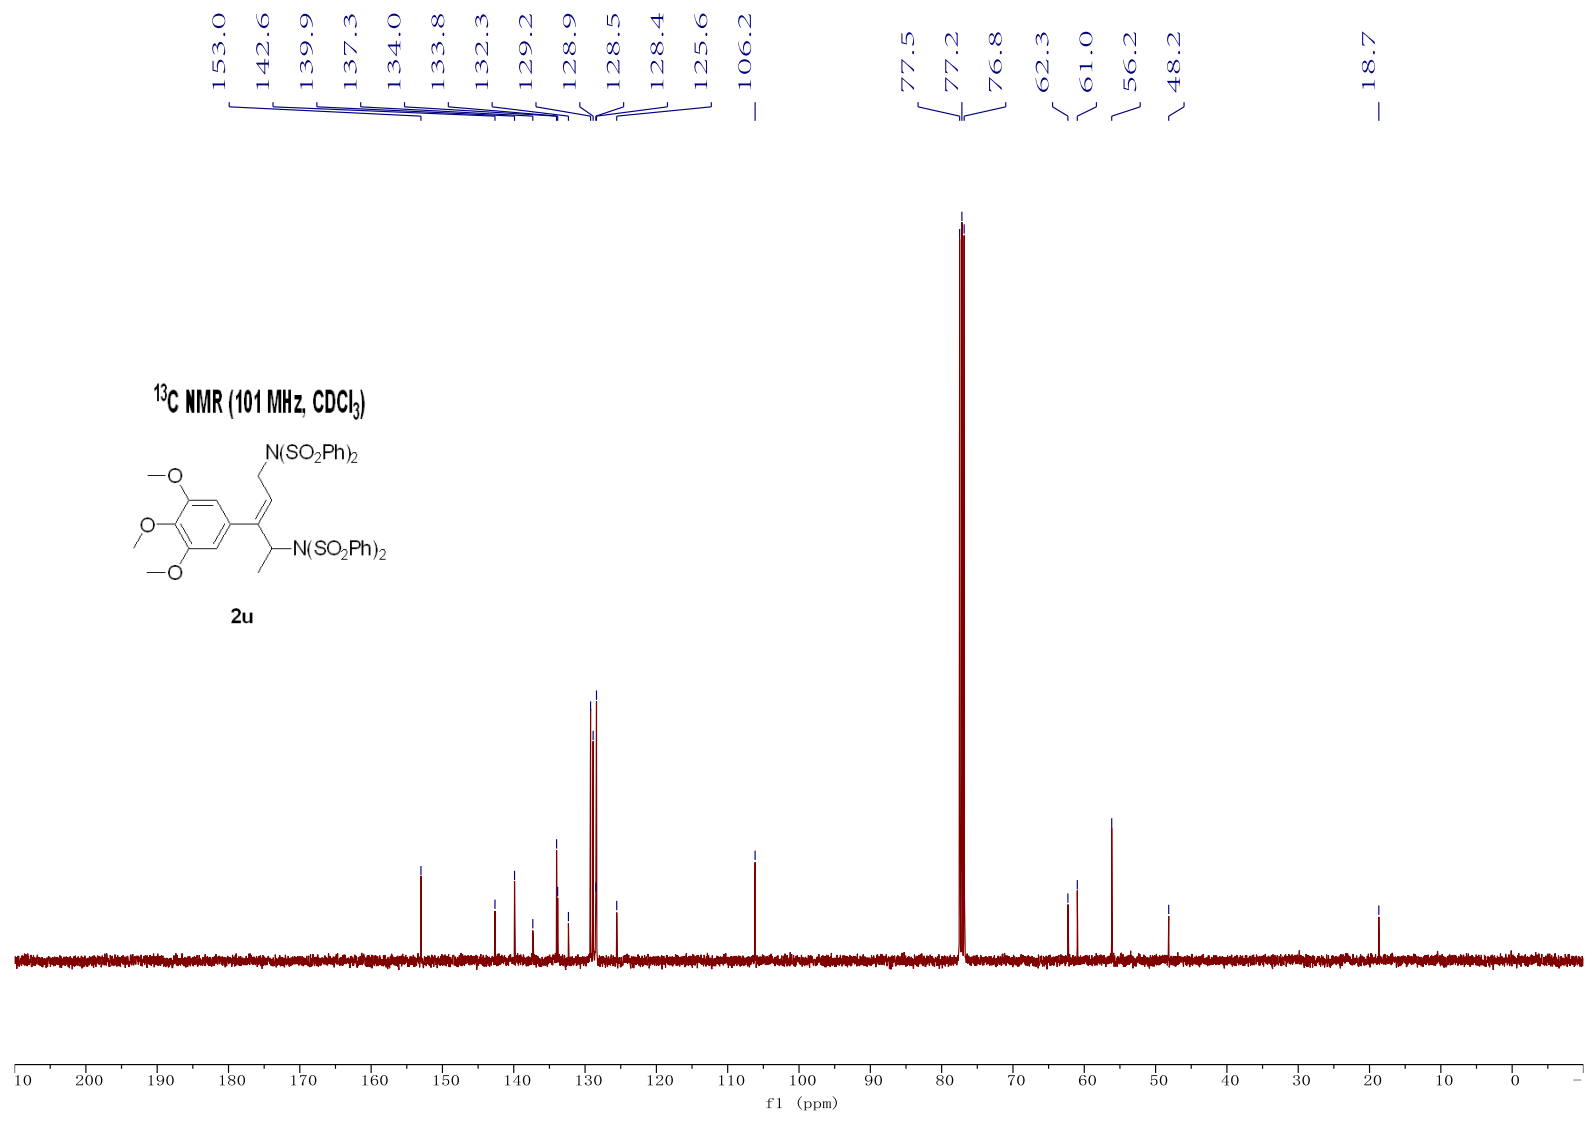

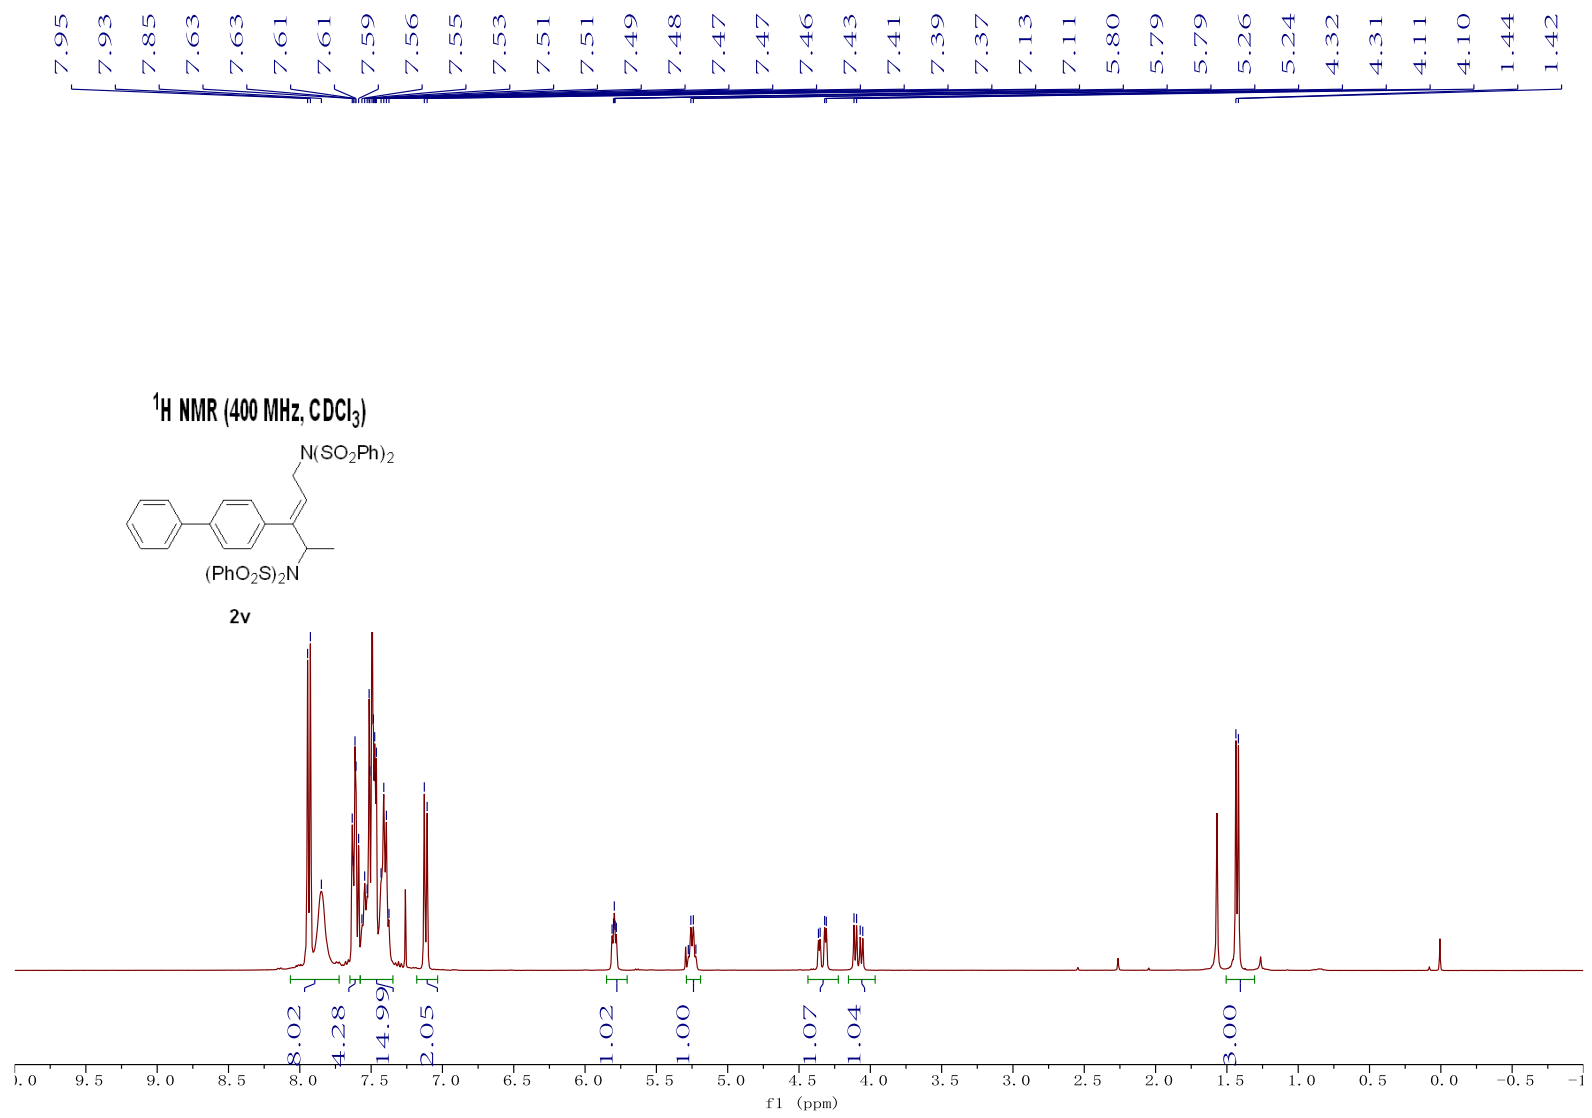

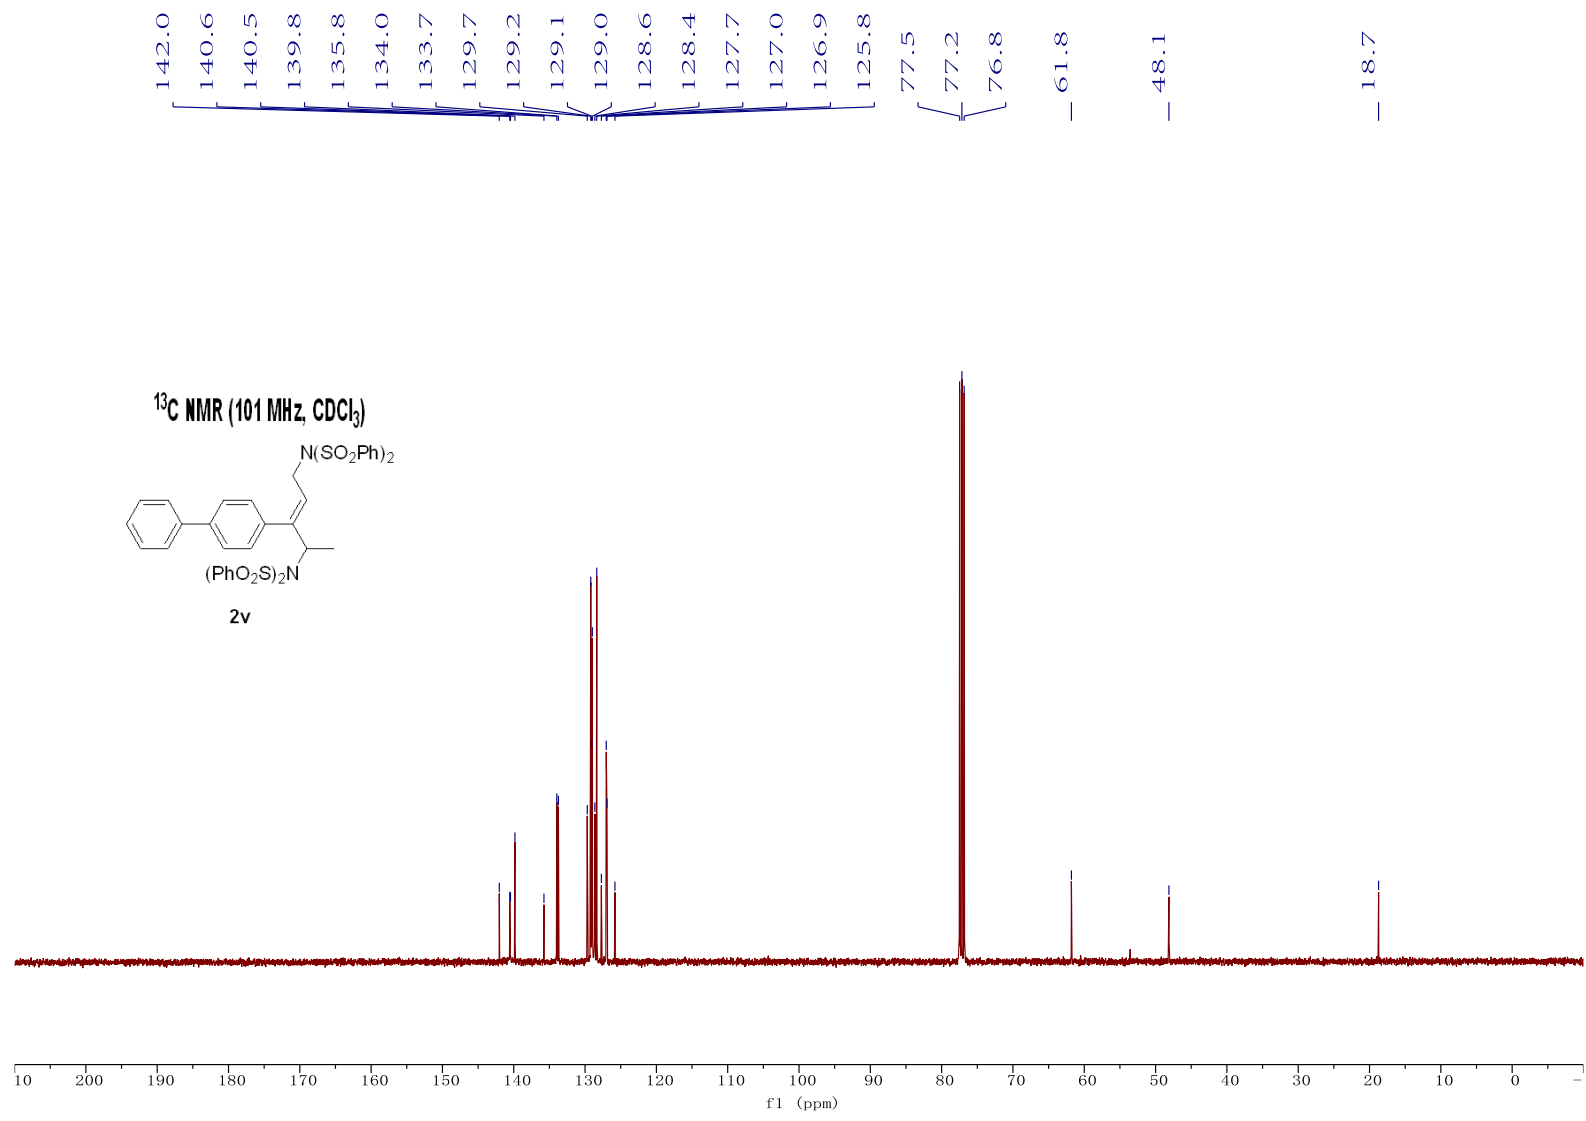

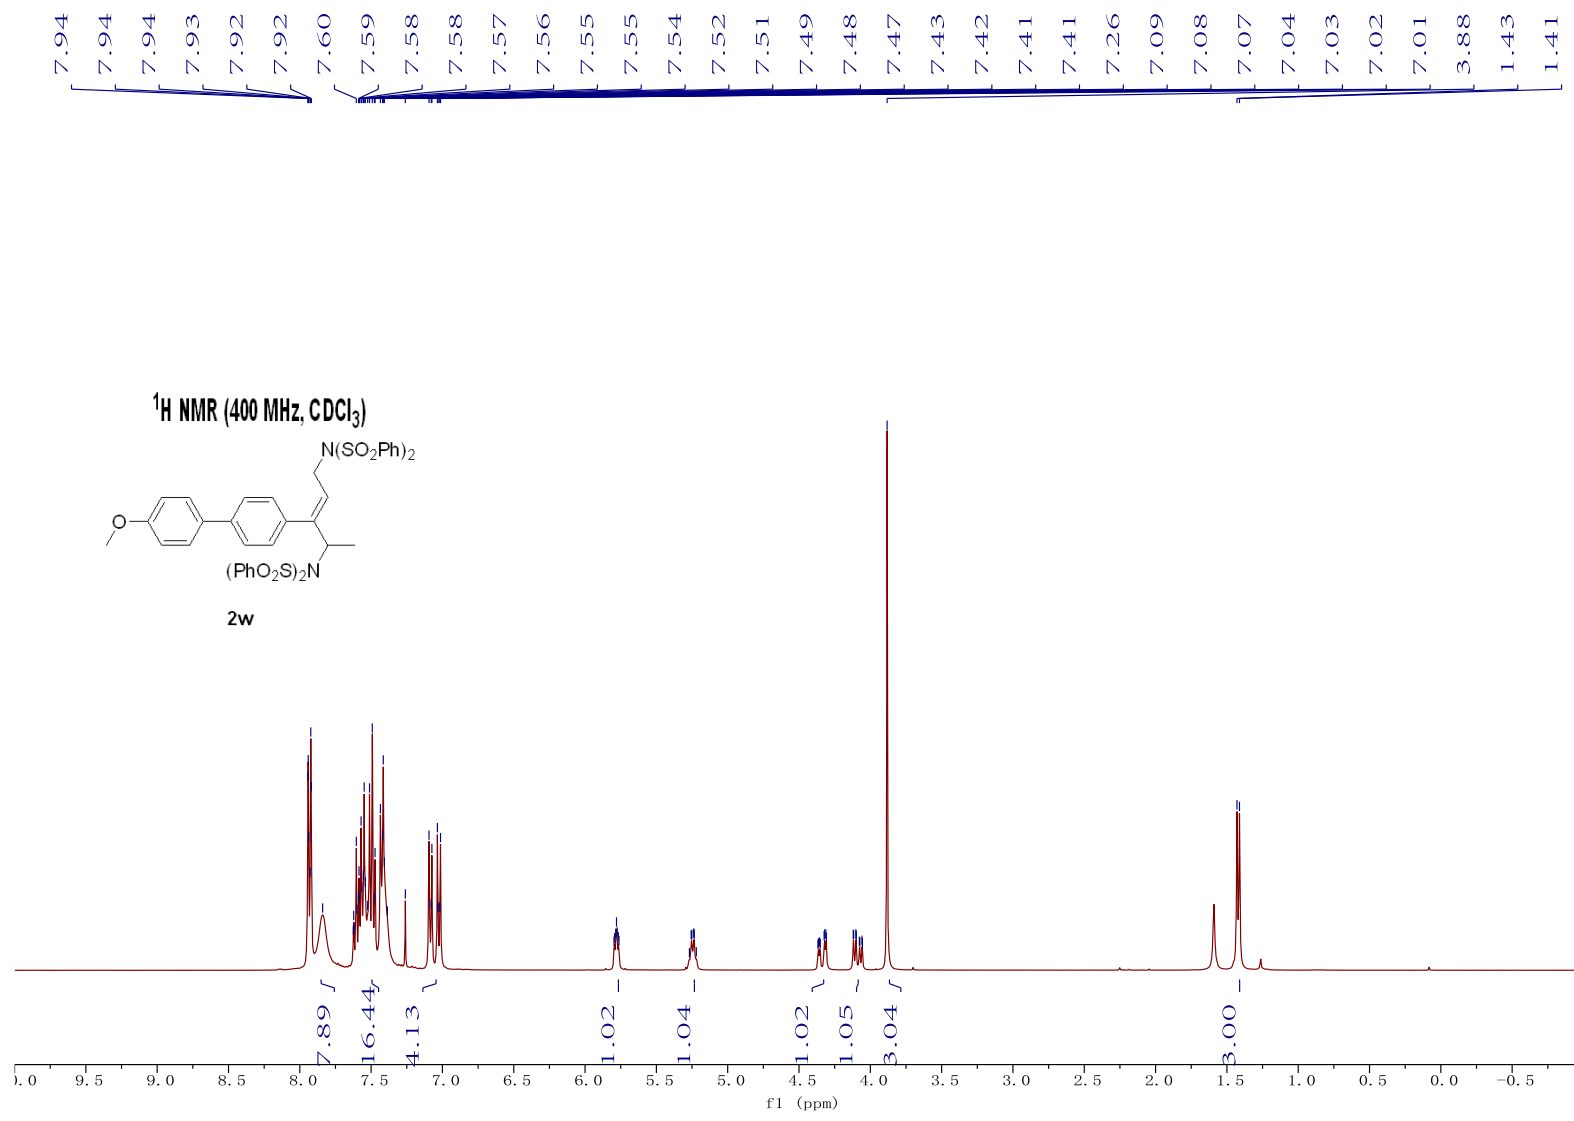



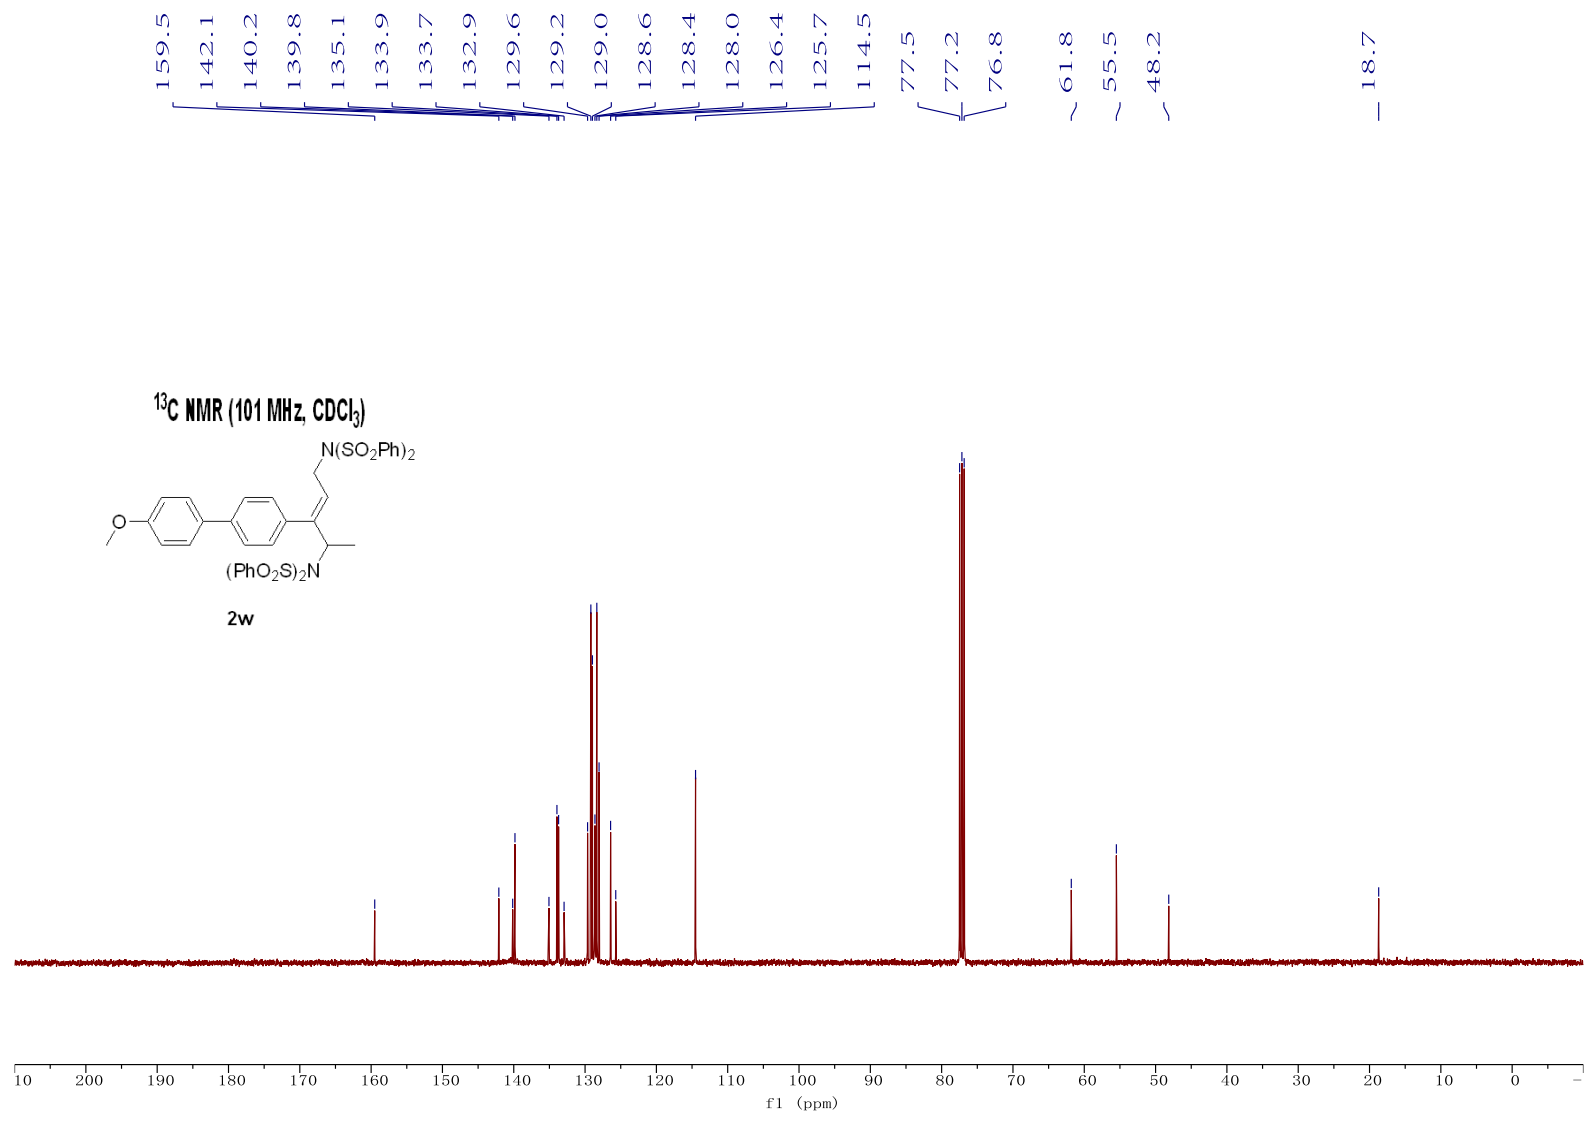

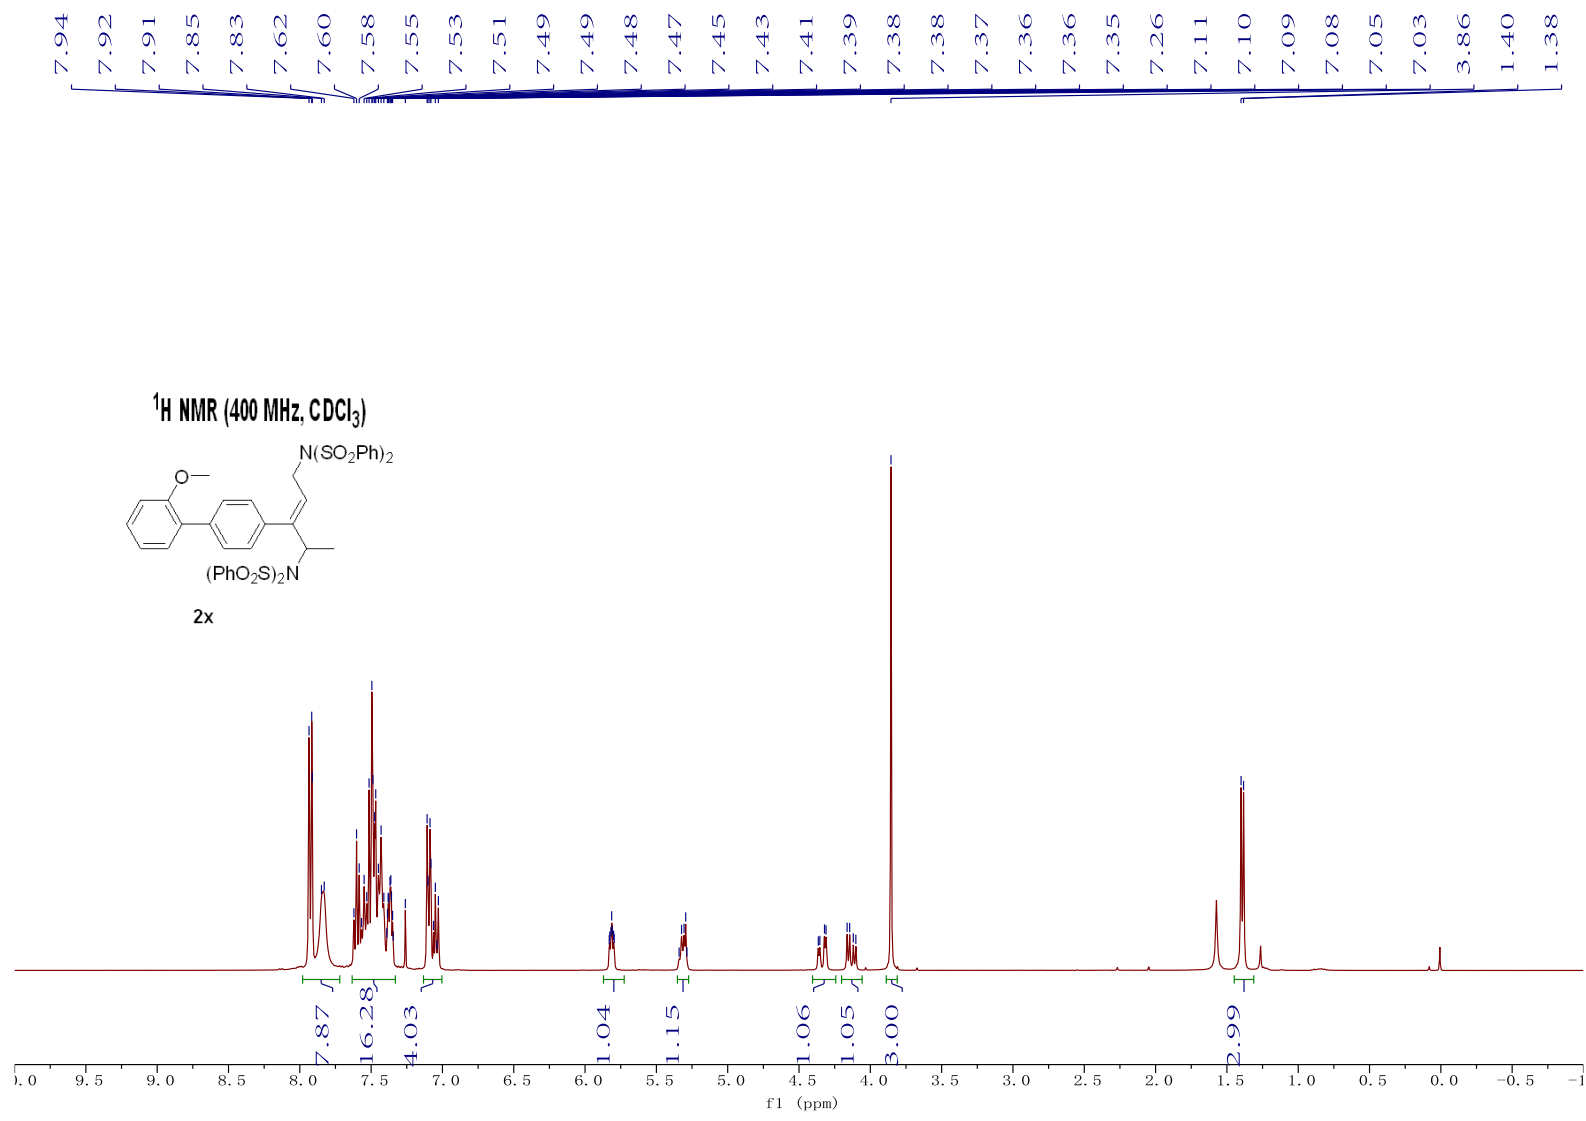

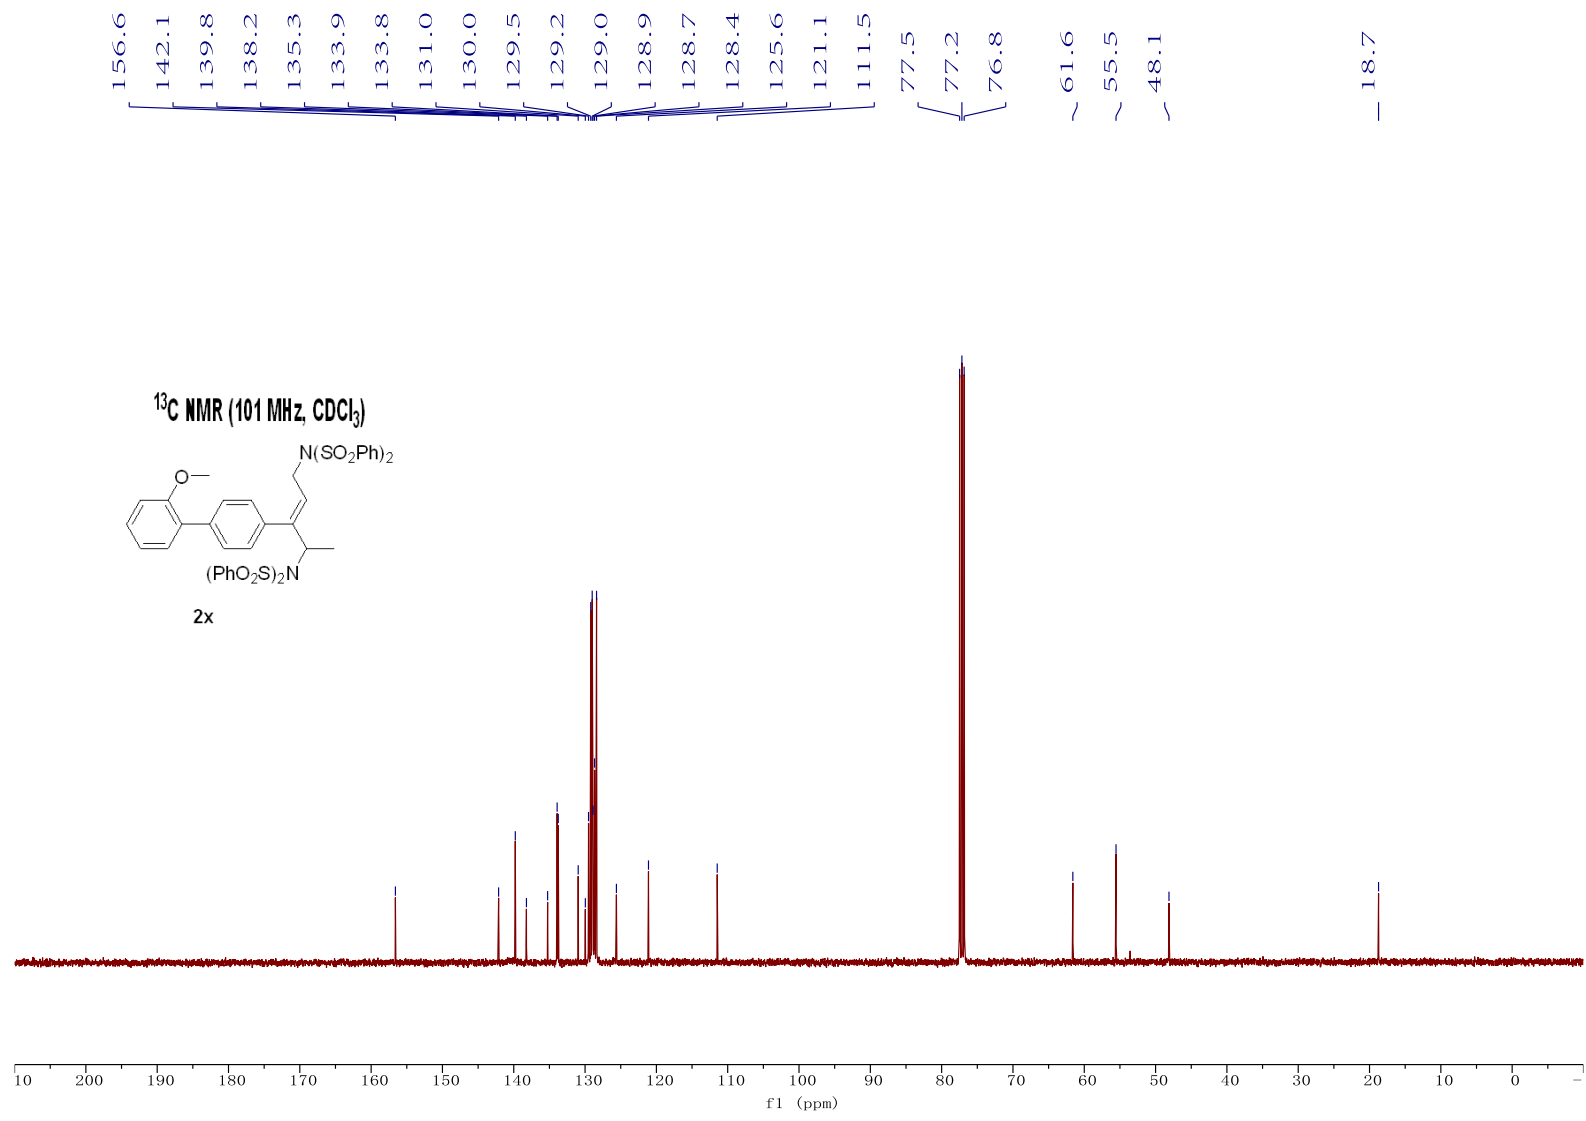

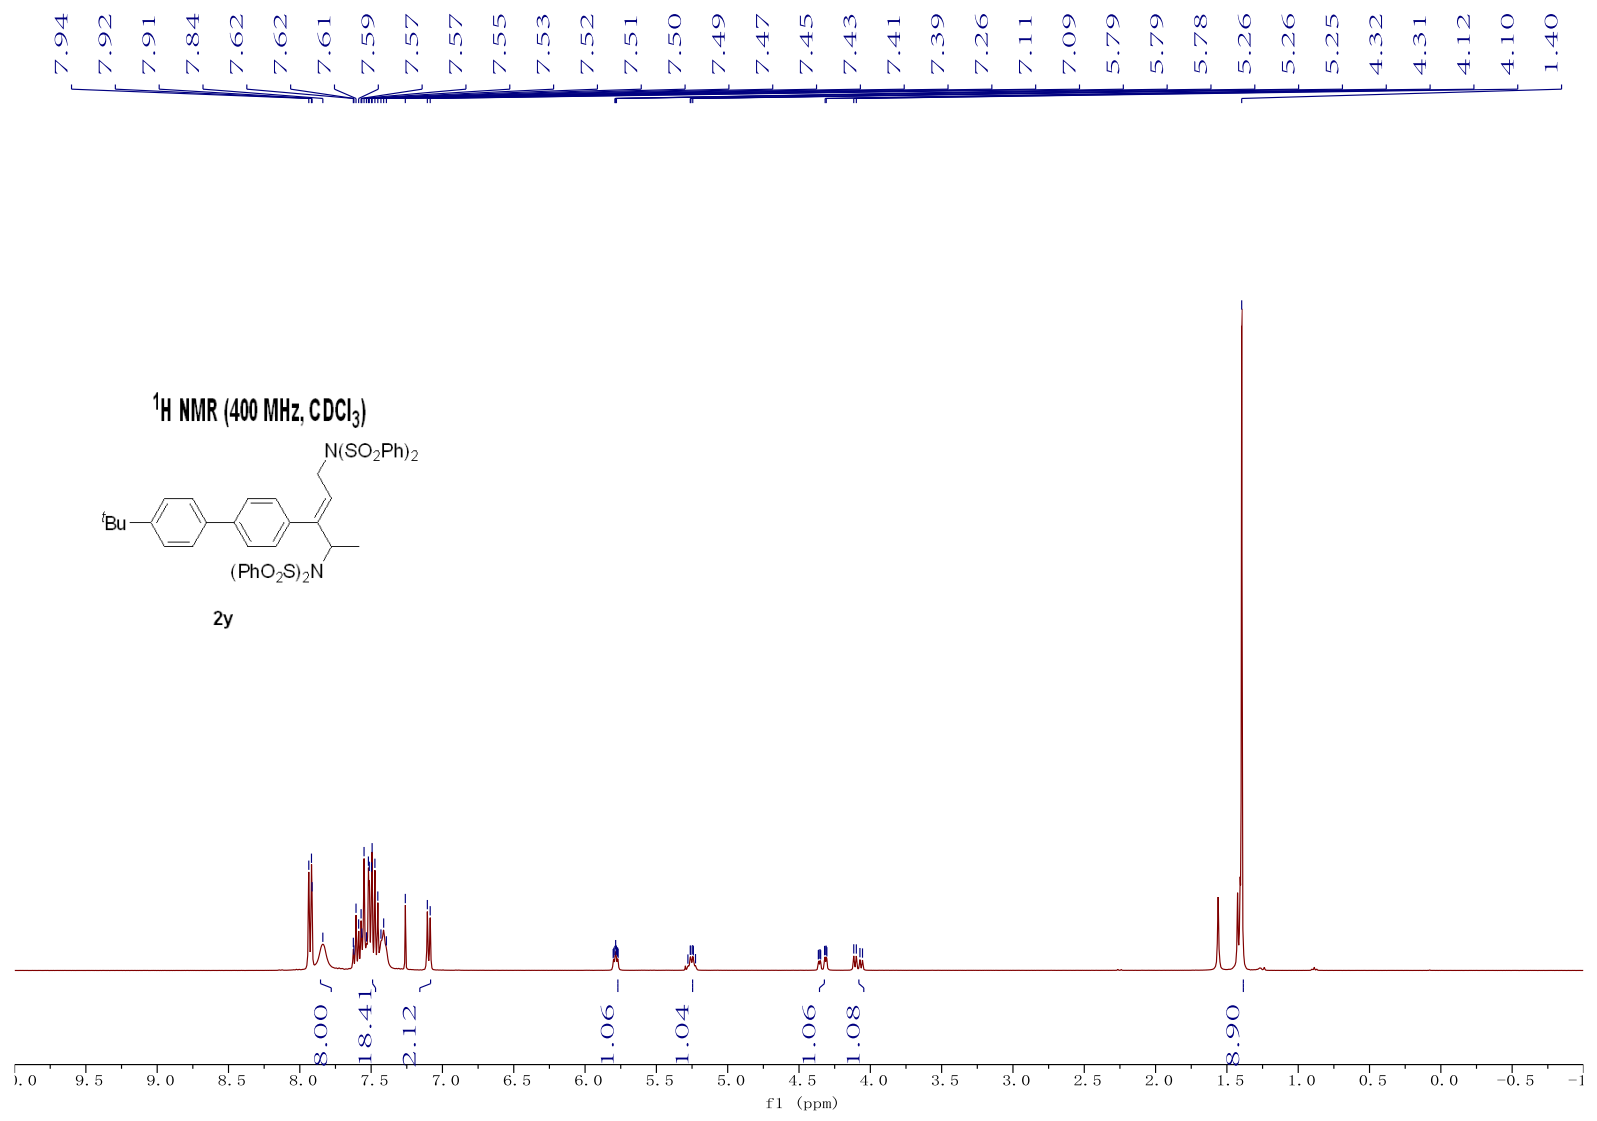

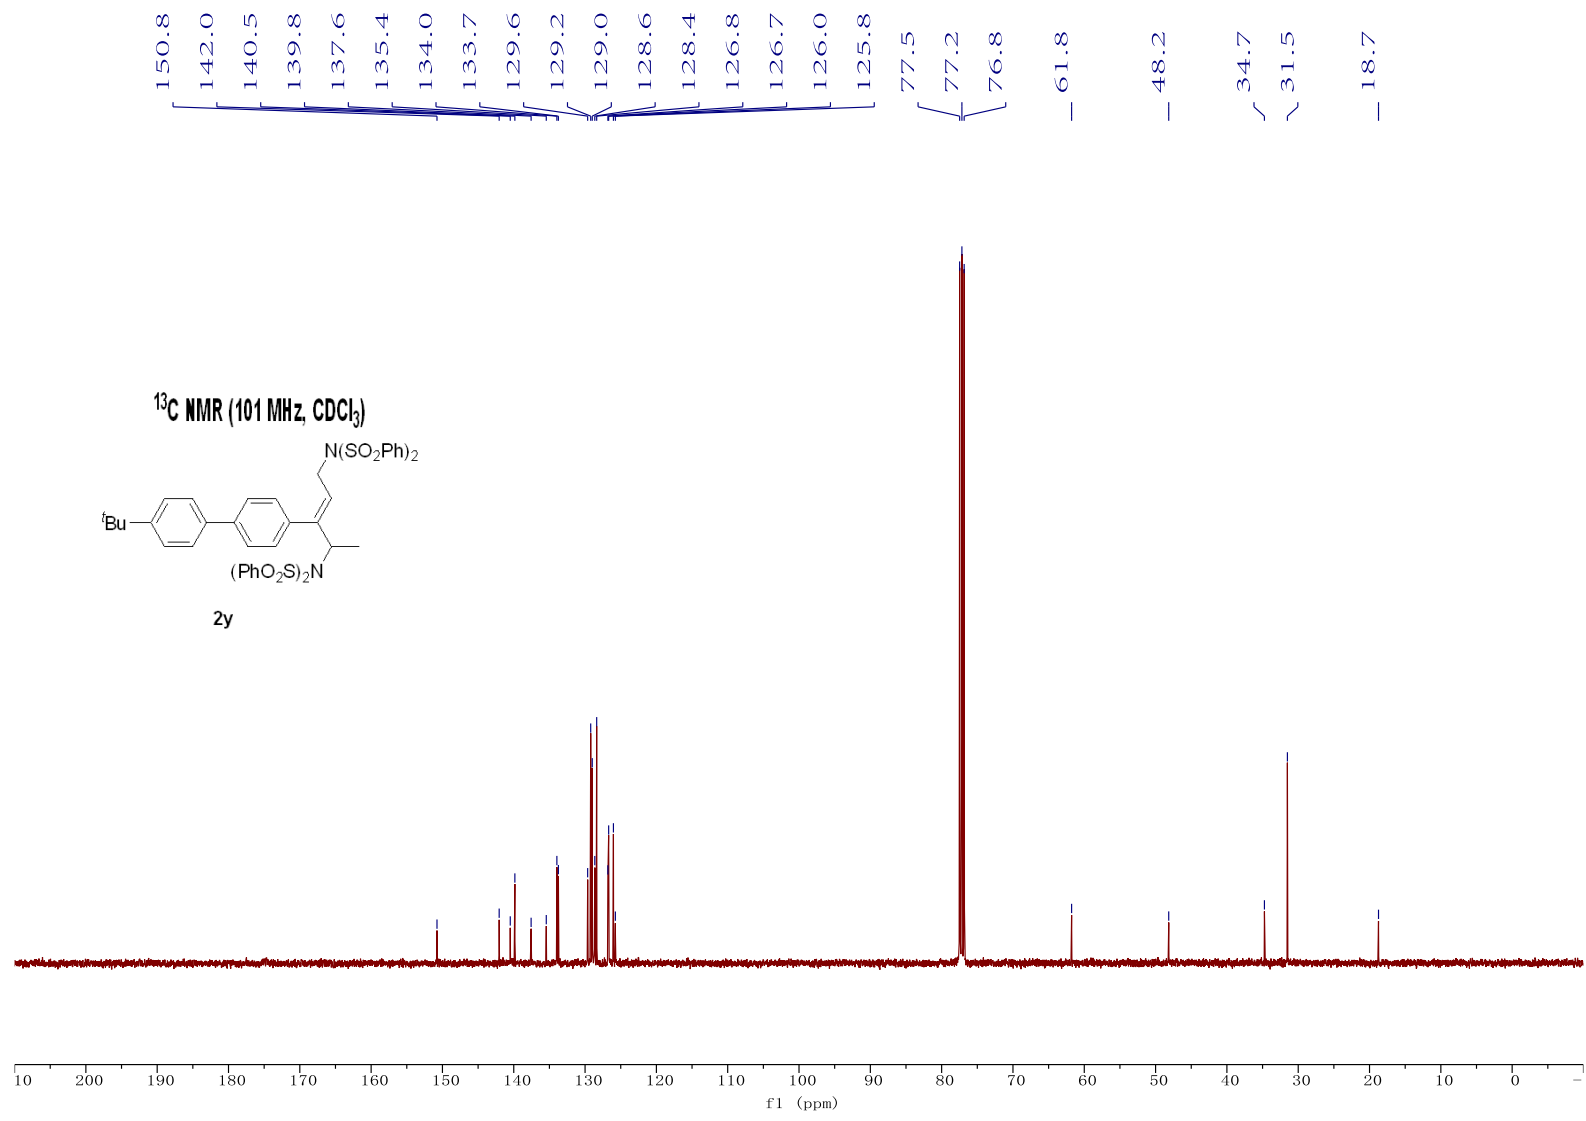

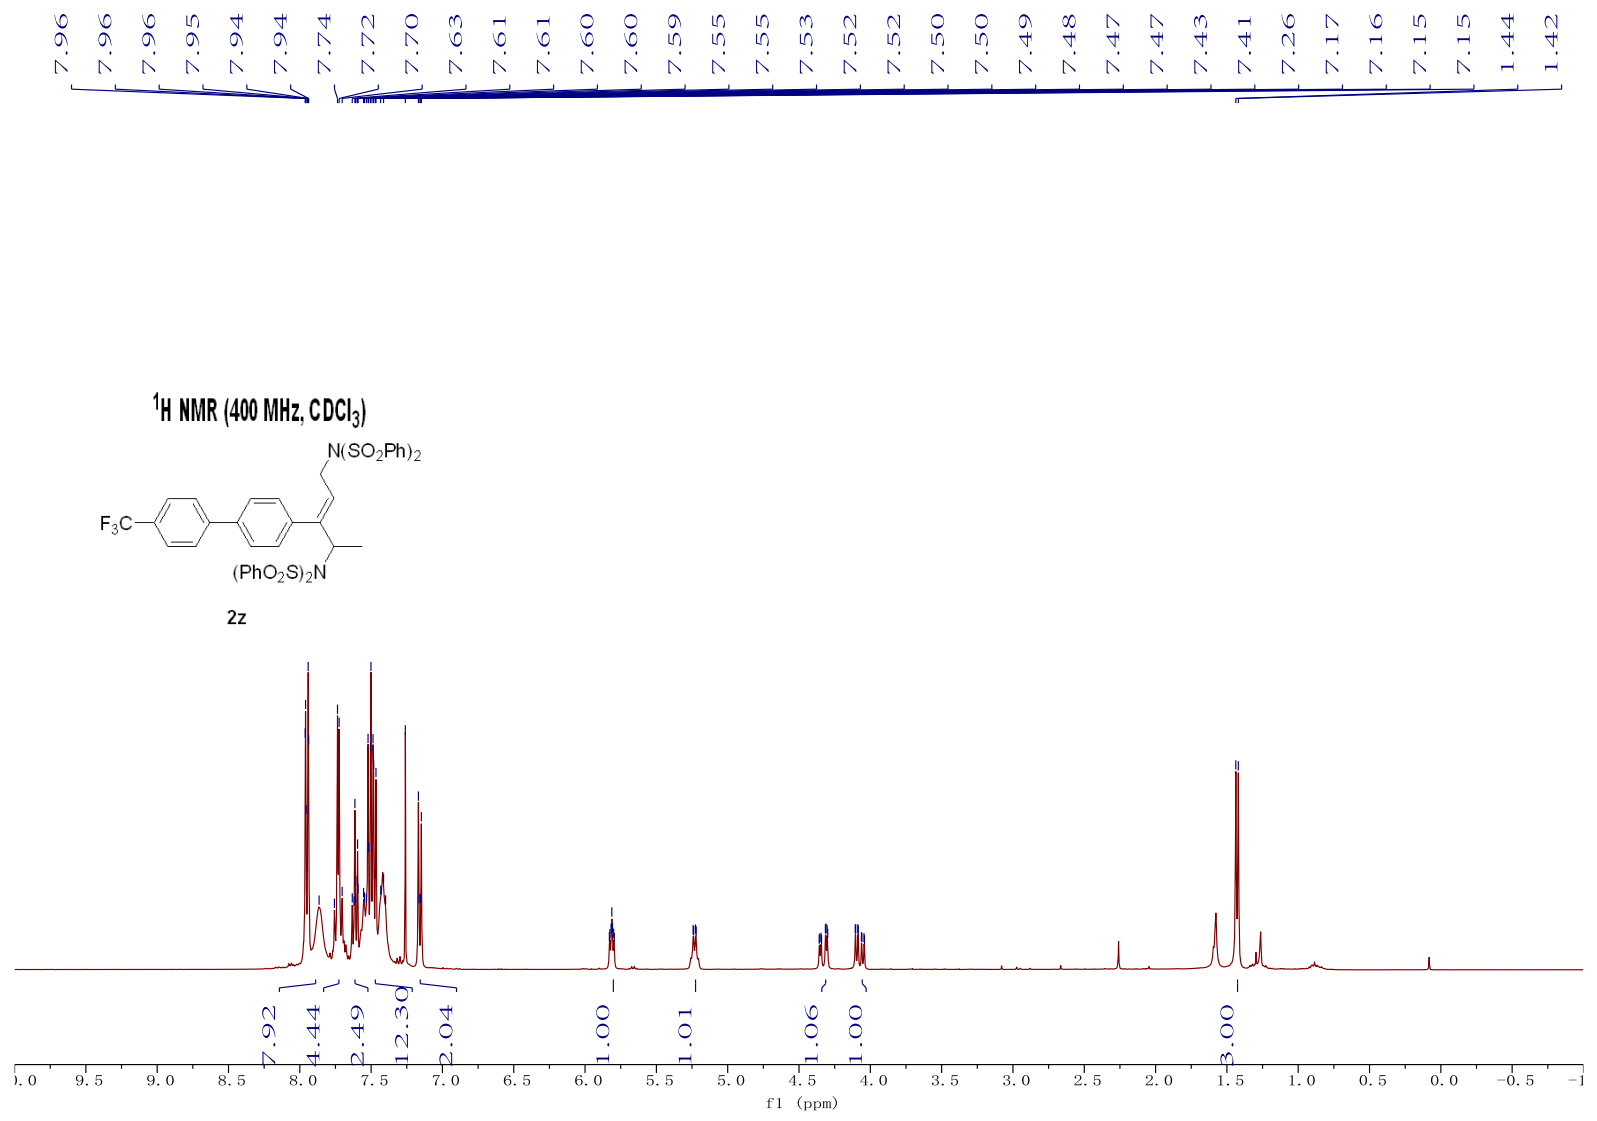

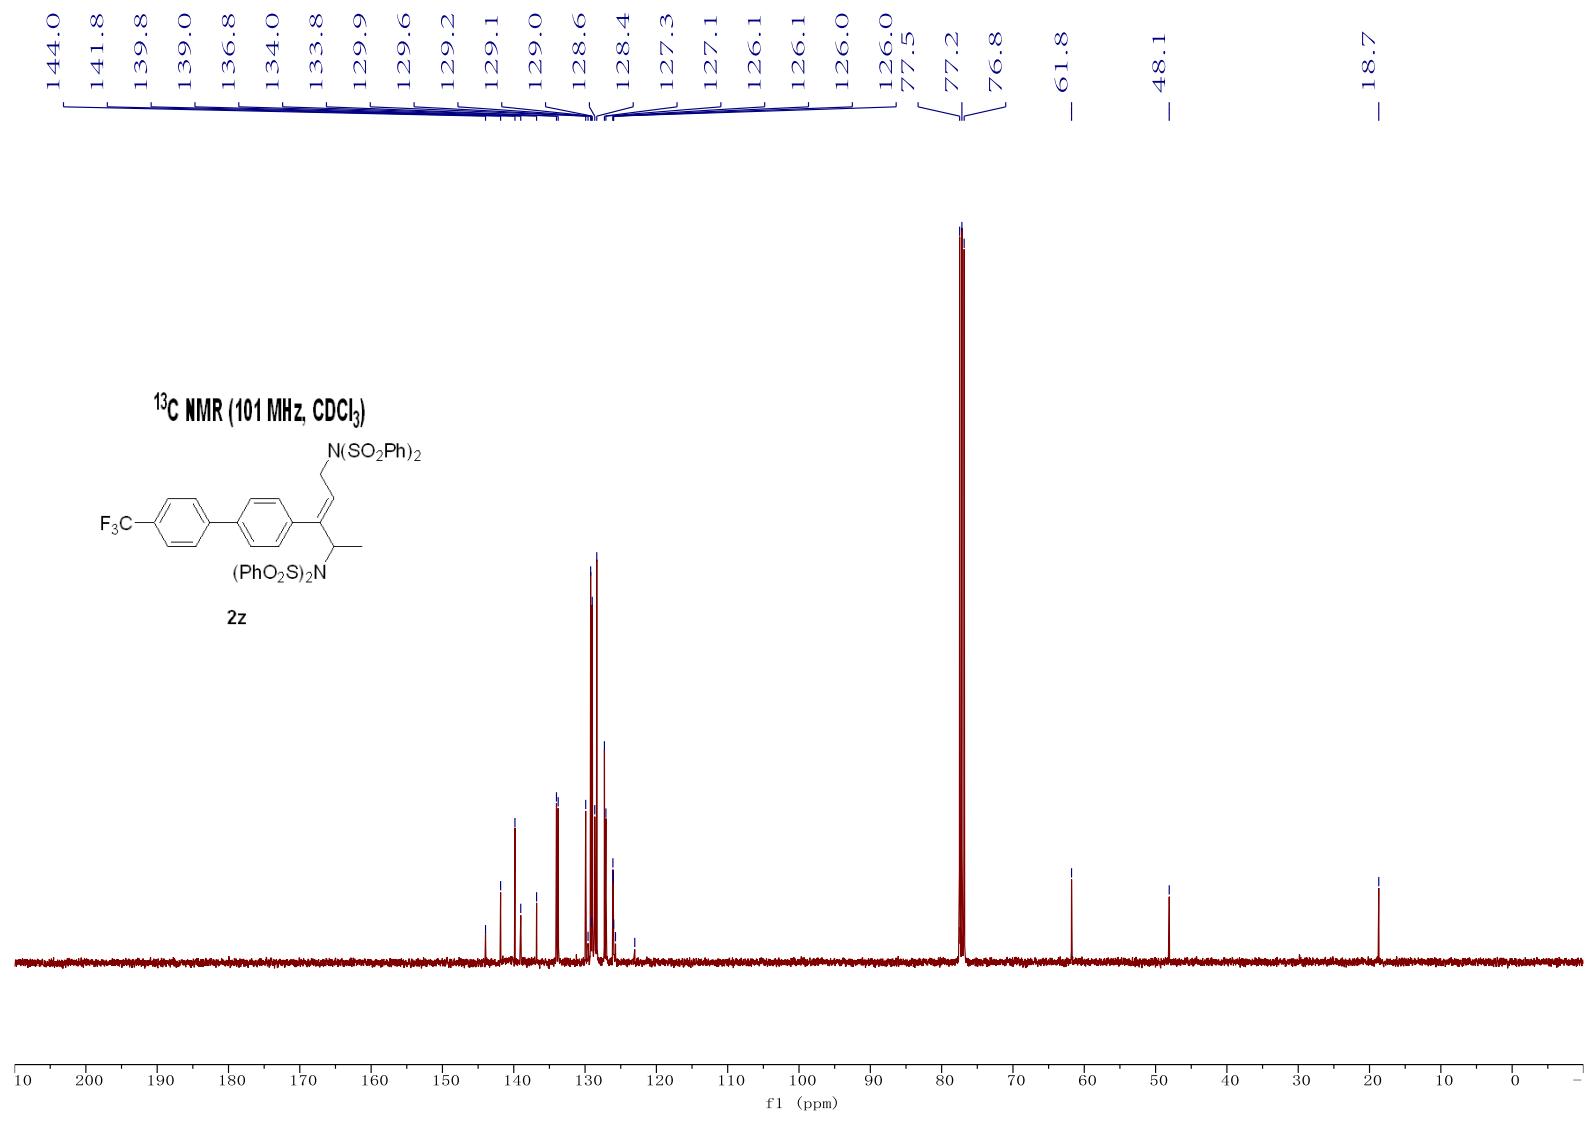

-62.4

<sup>19</sup>F NMR (376 MHz, CDCl<sub>3</sub>)

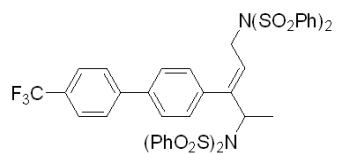

2z

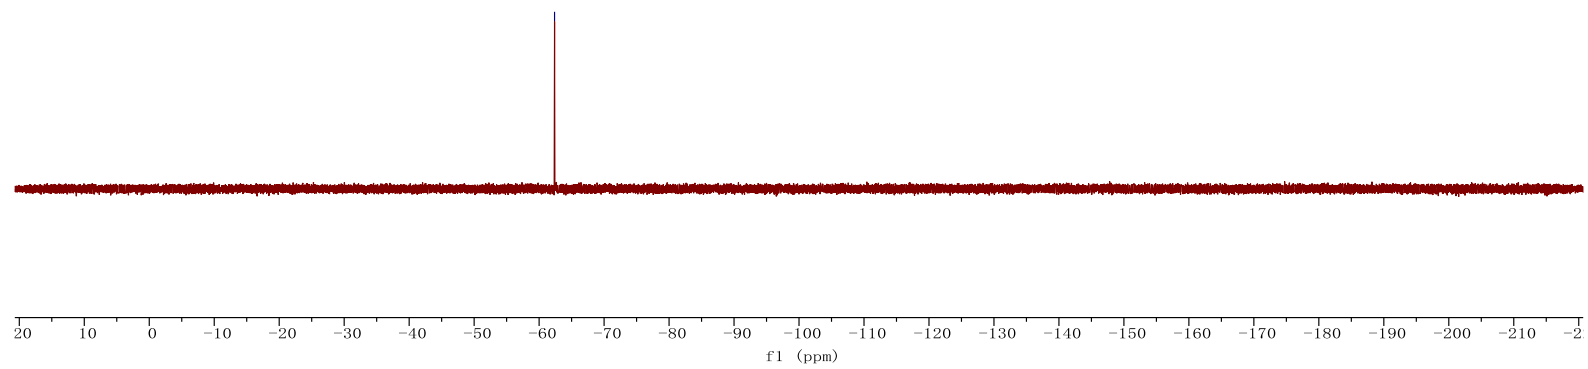

S272



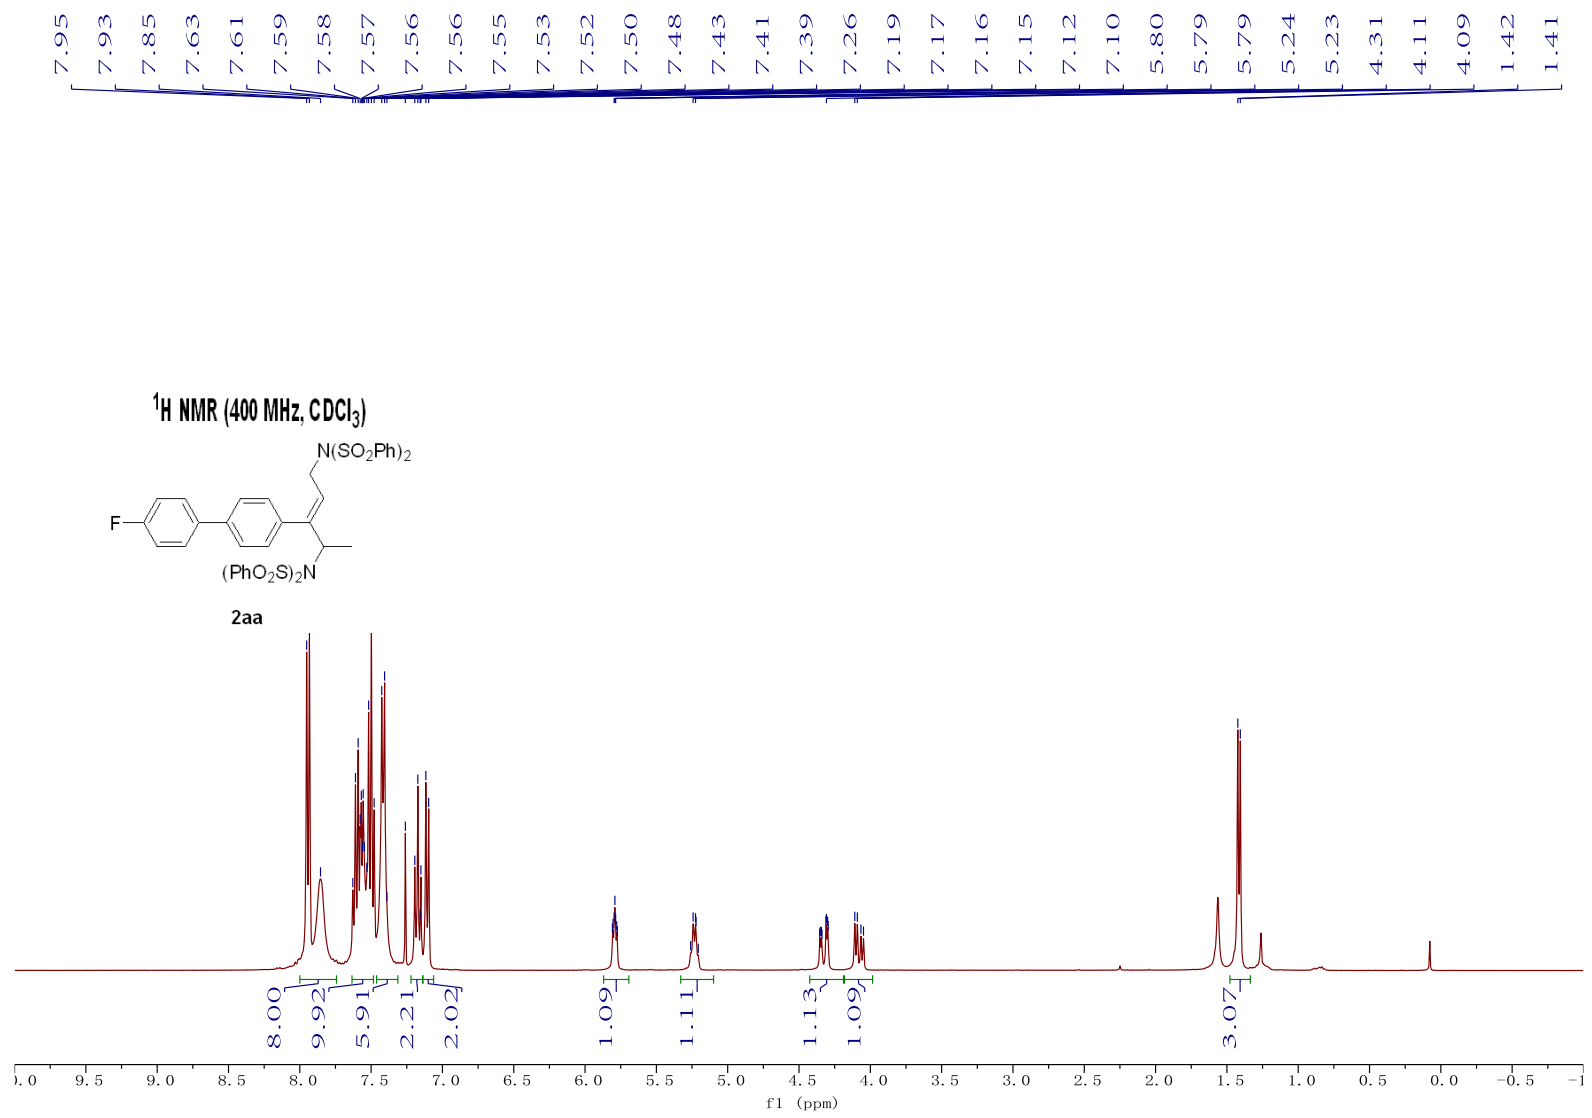

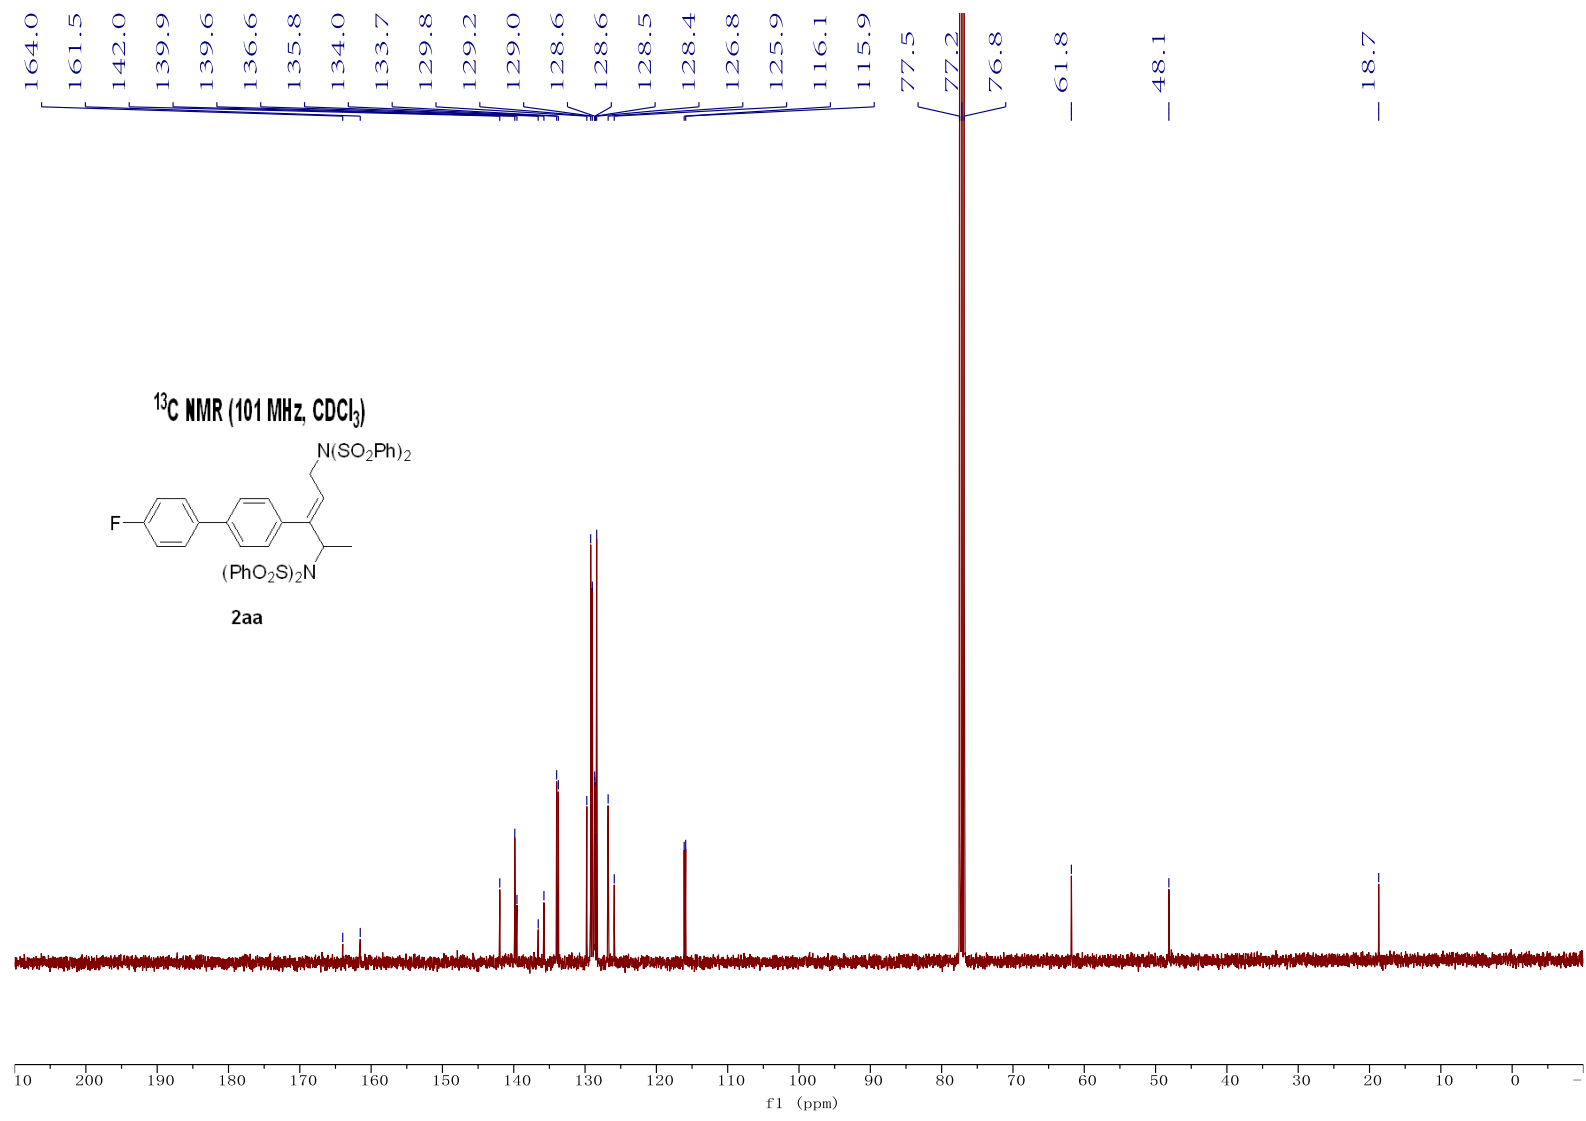

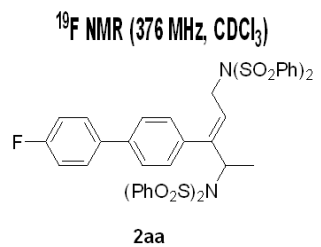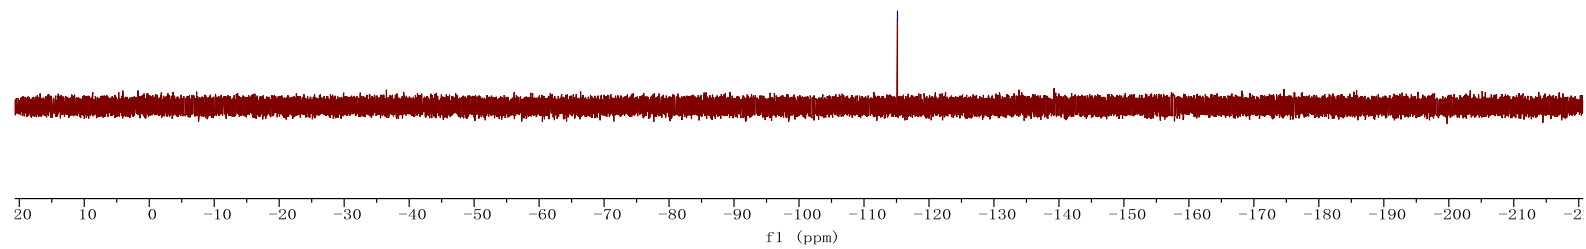

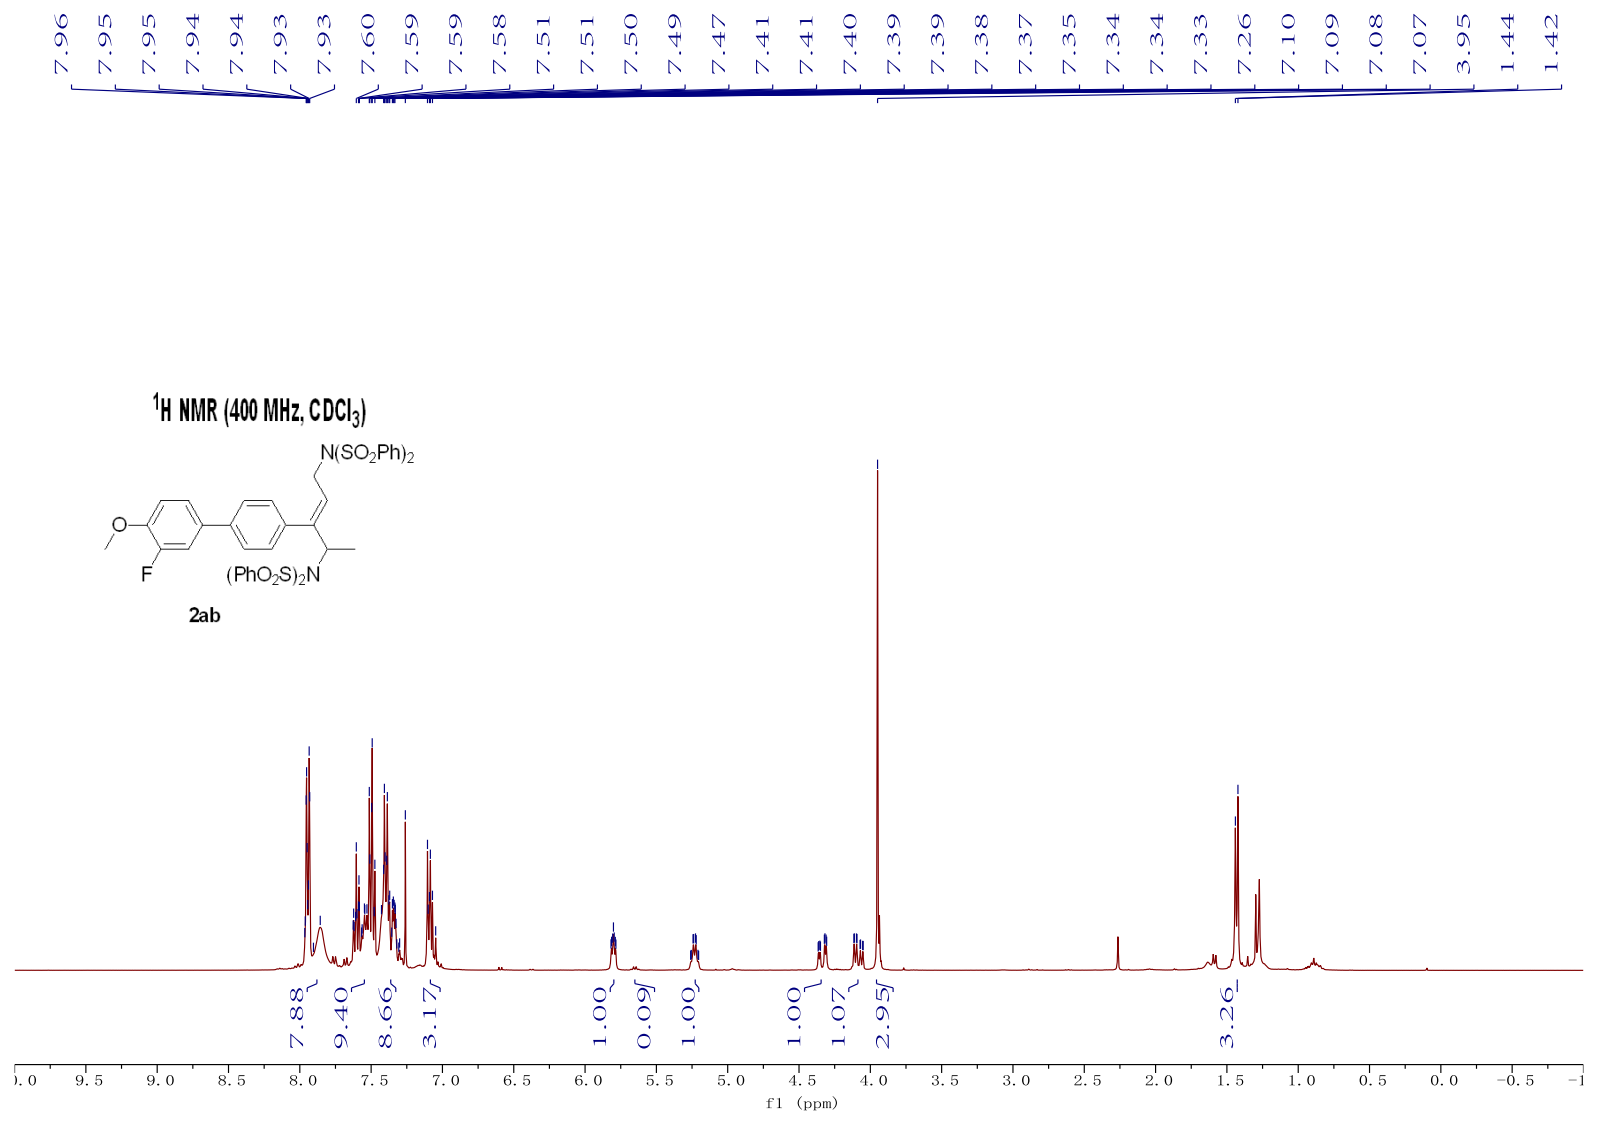

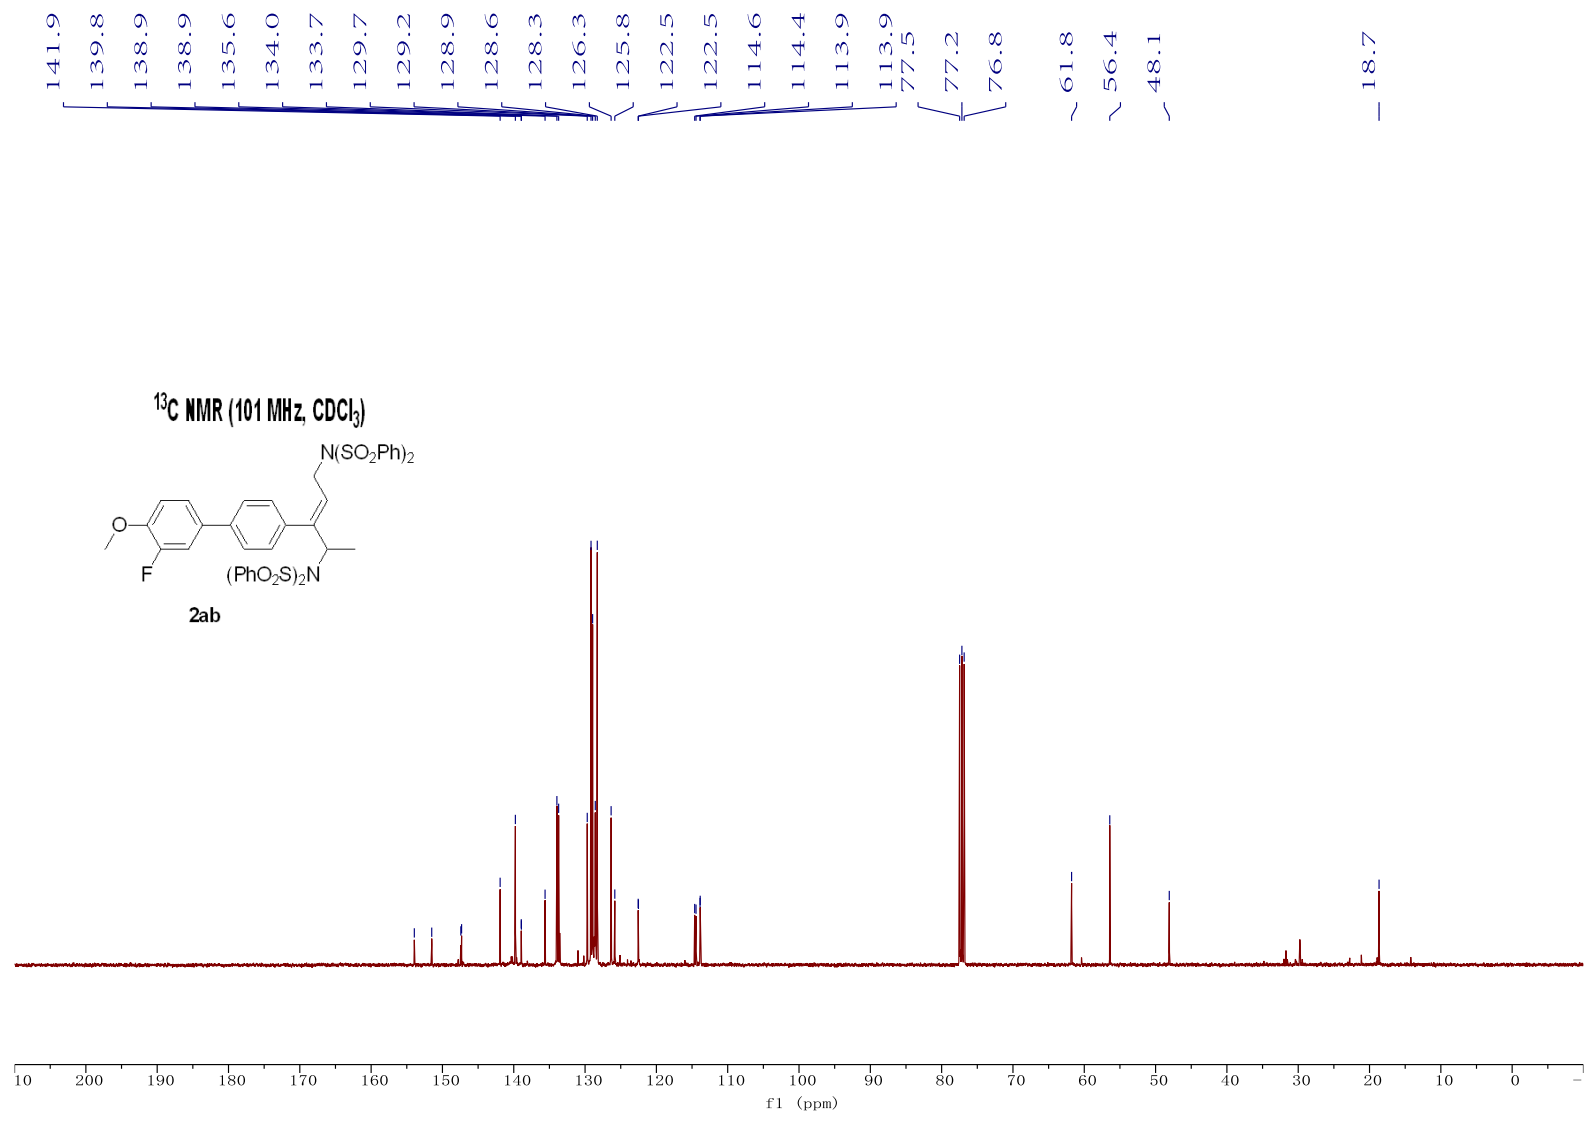

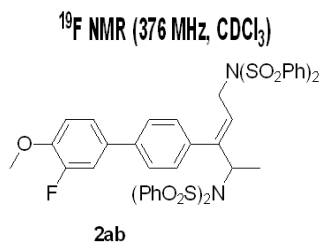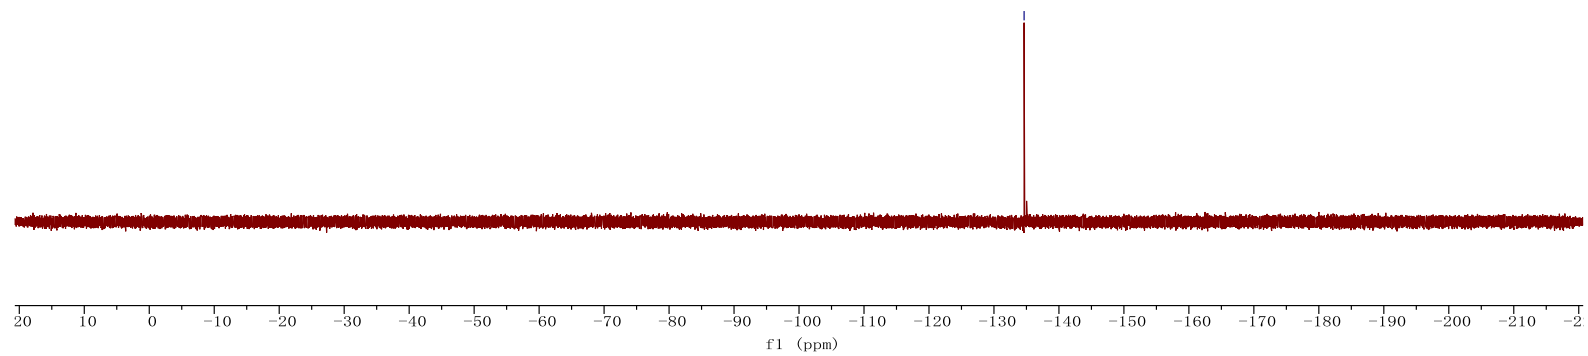

- 134.6

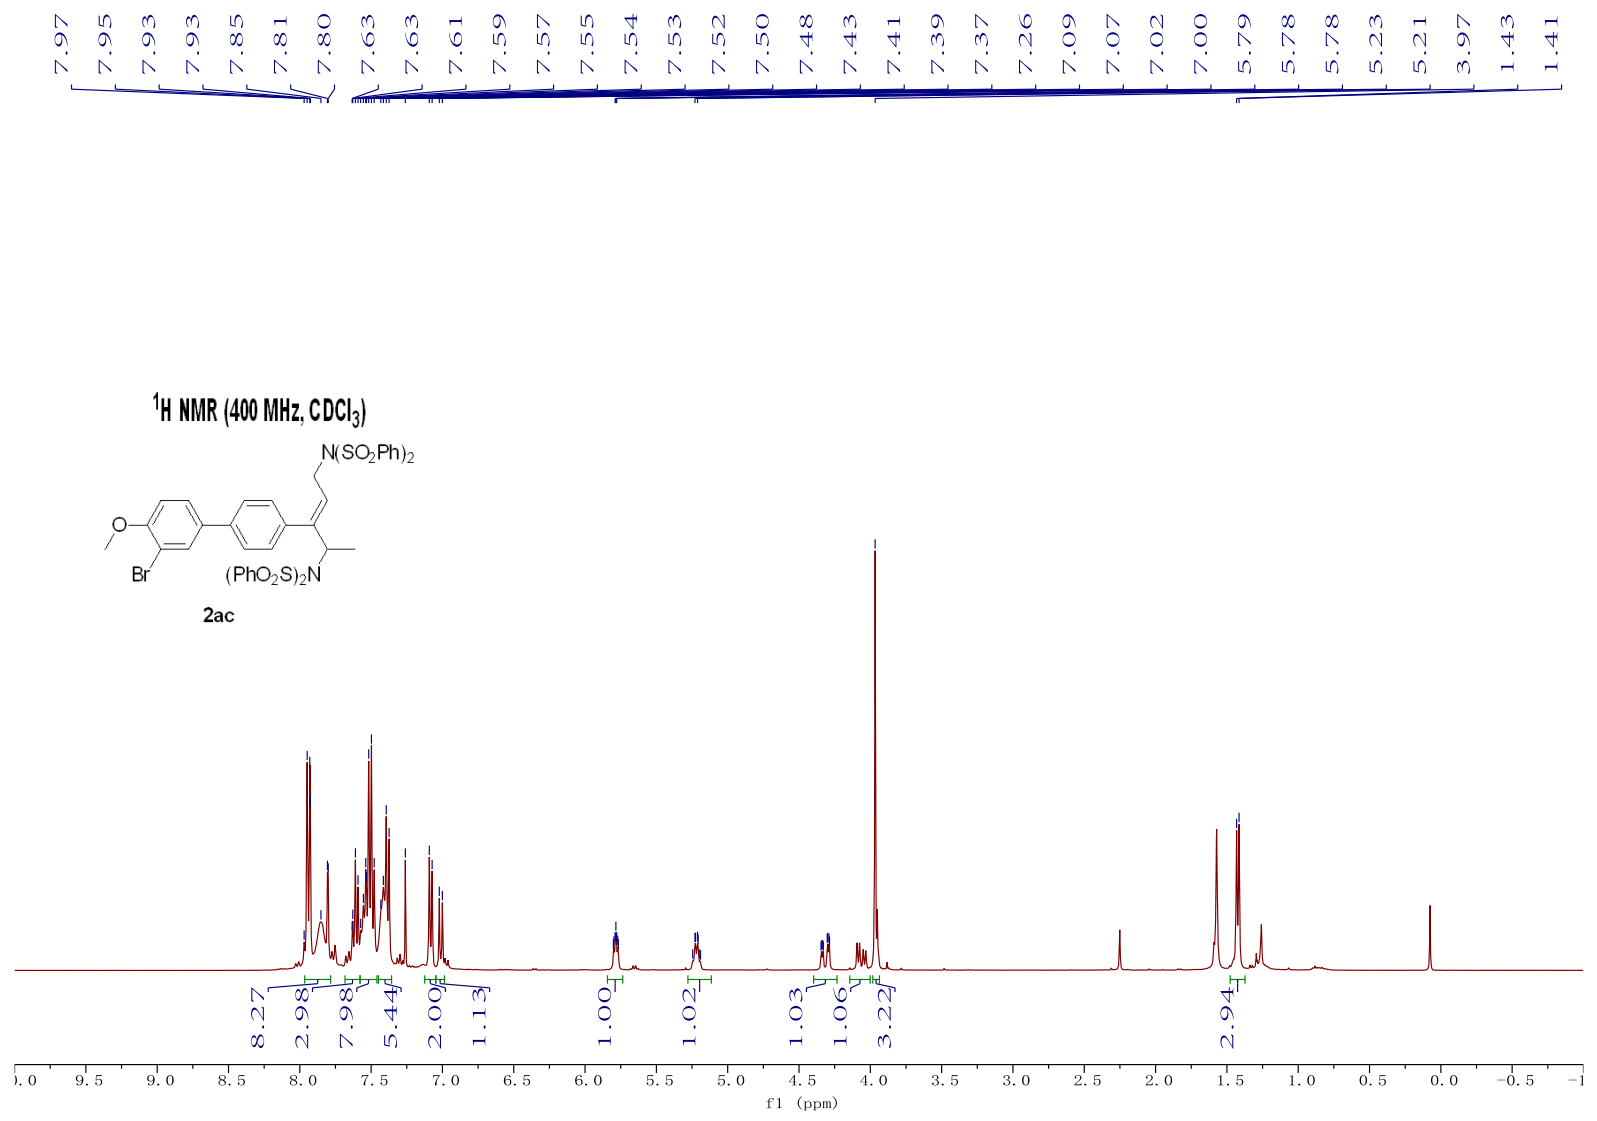

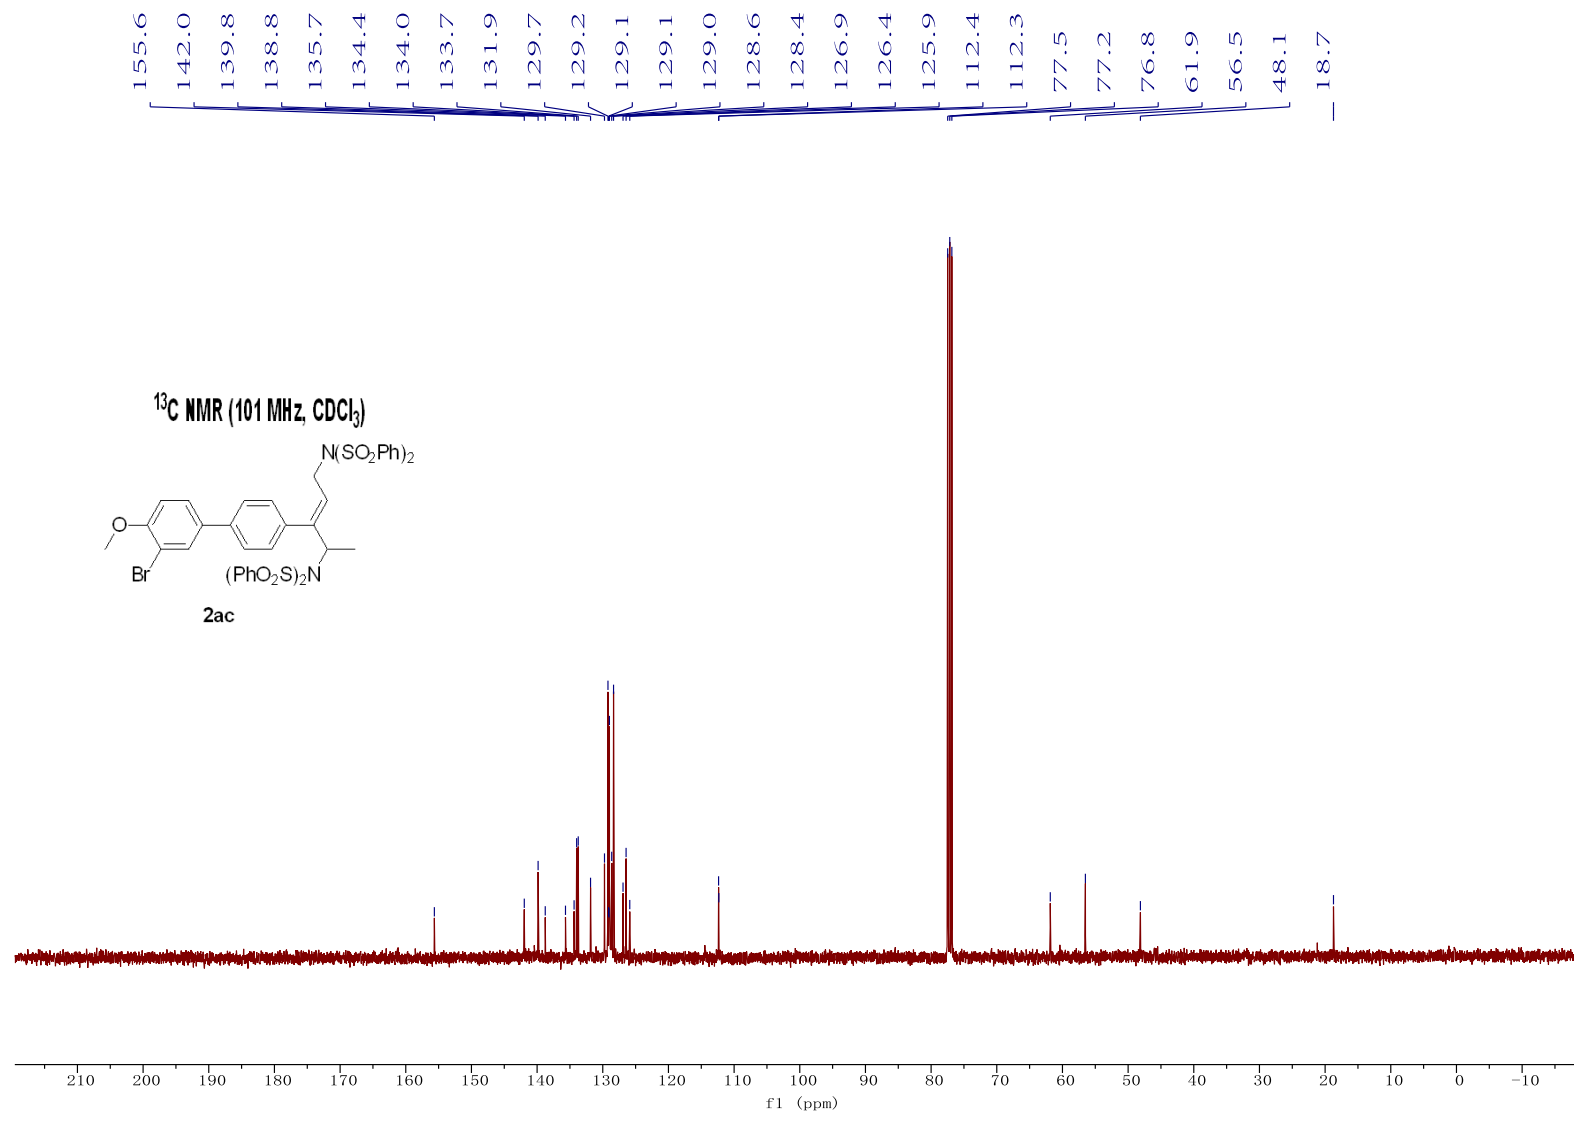



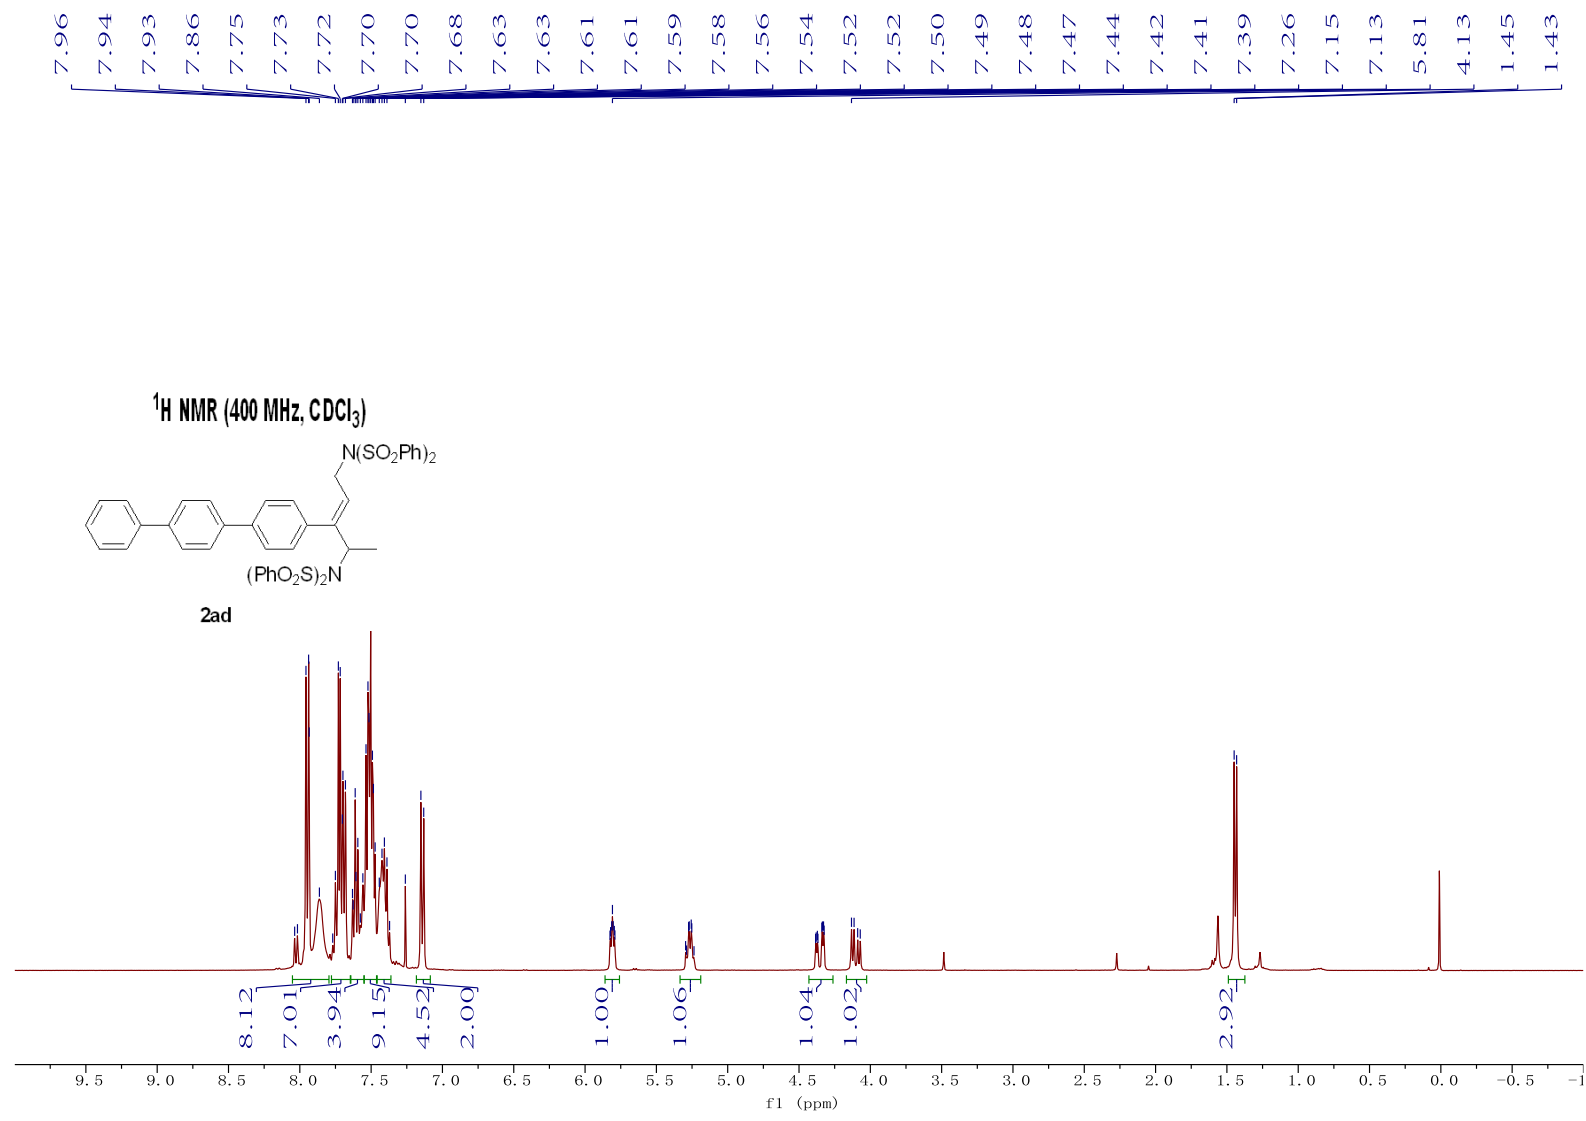

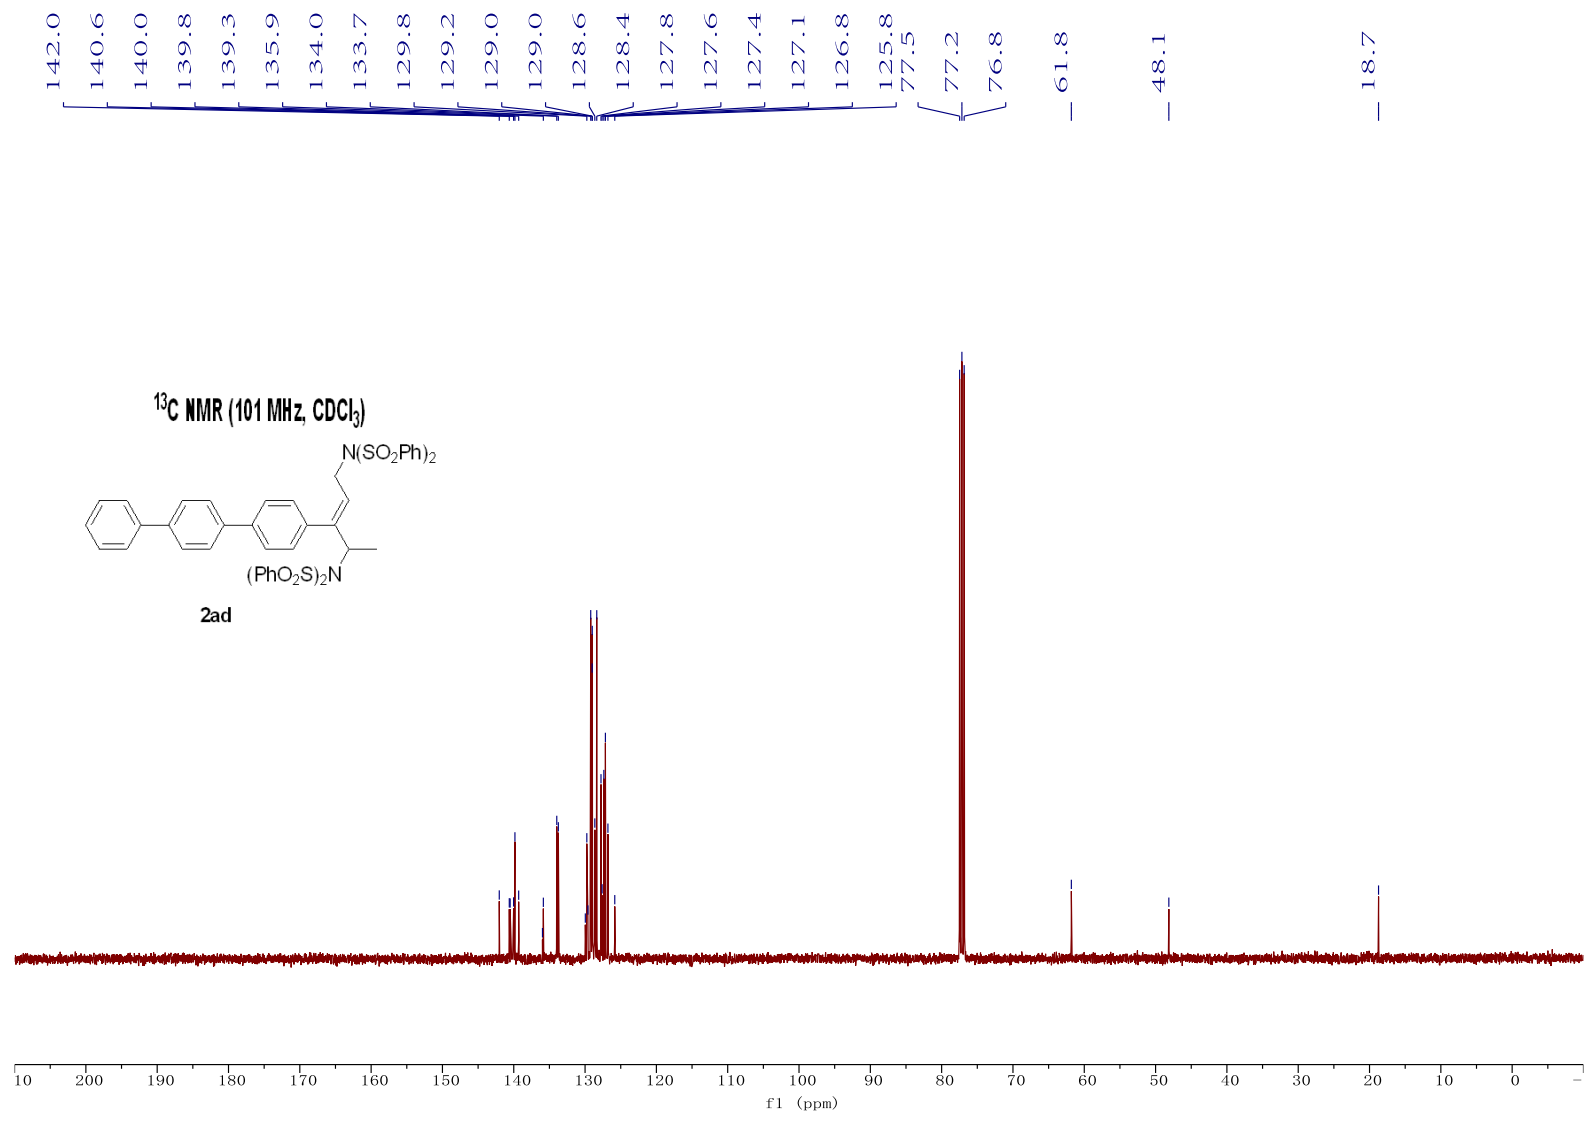

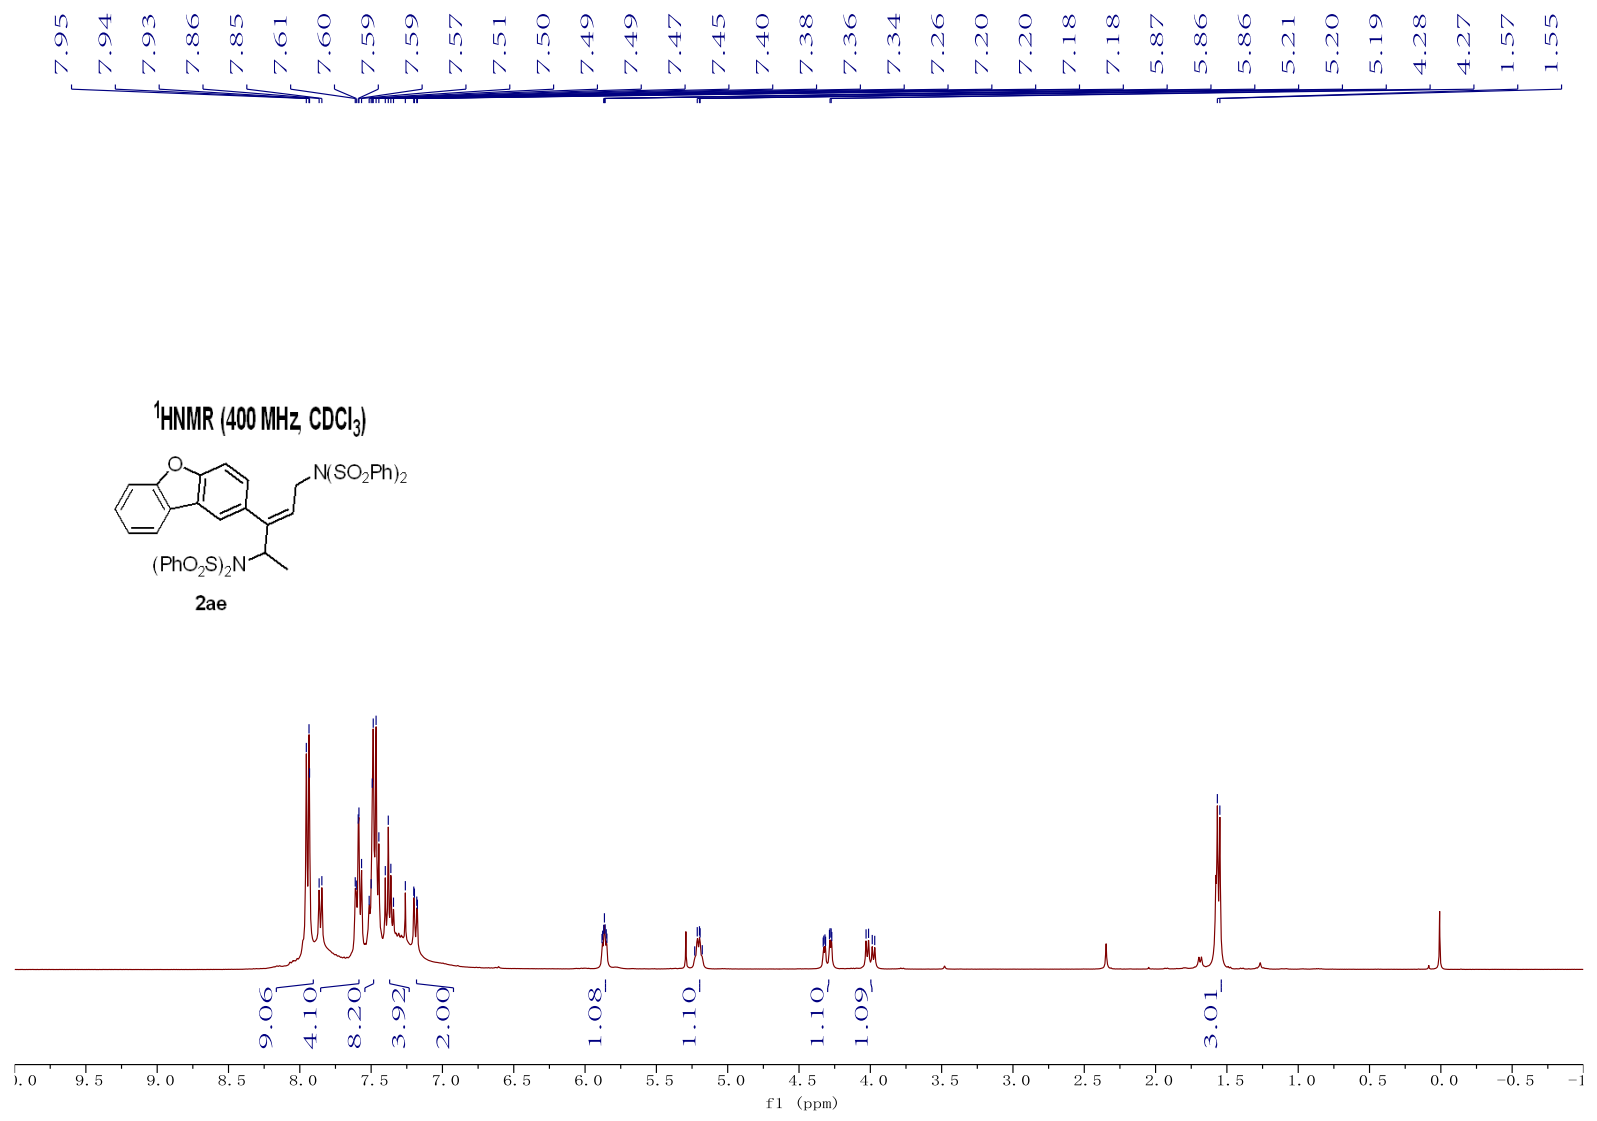

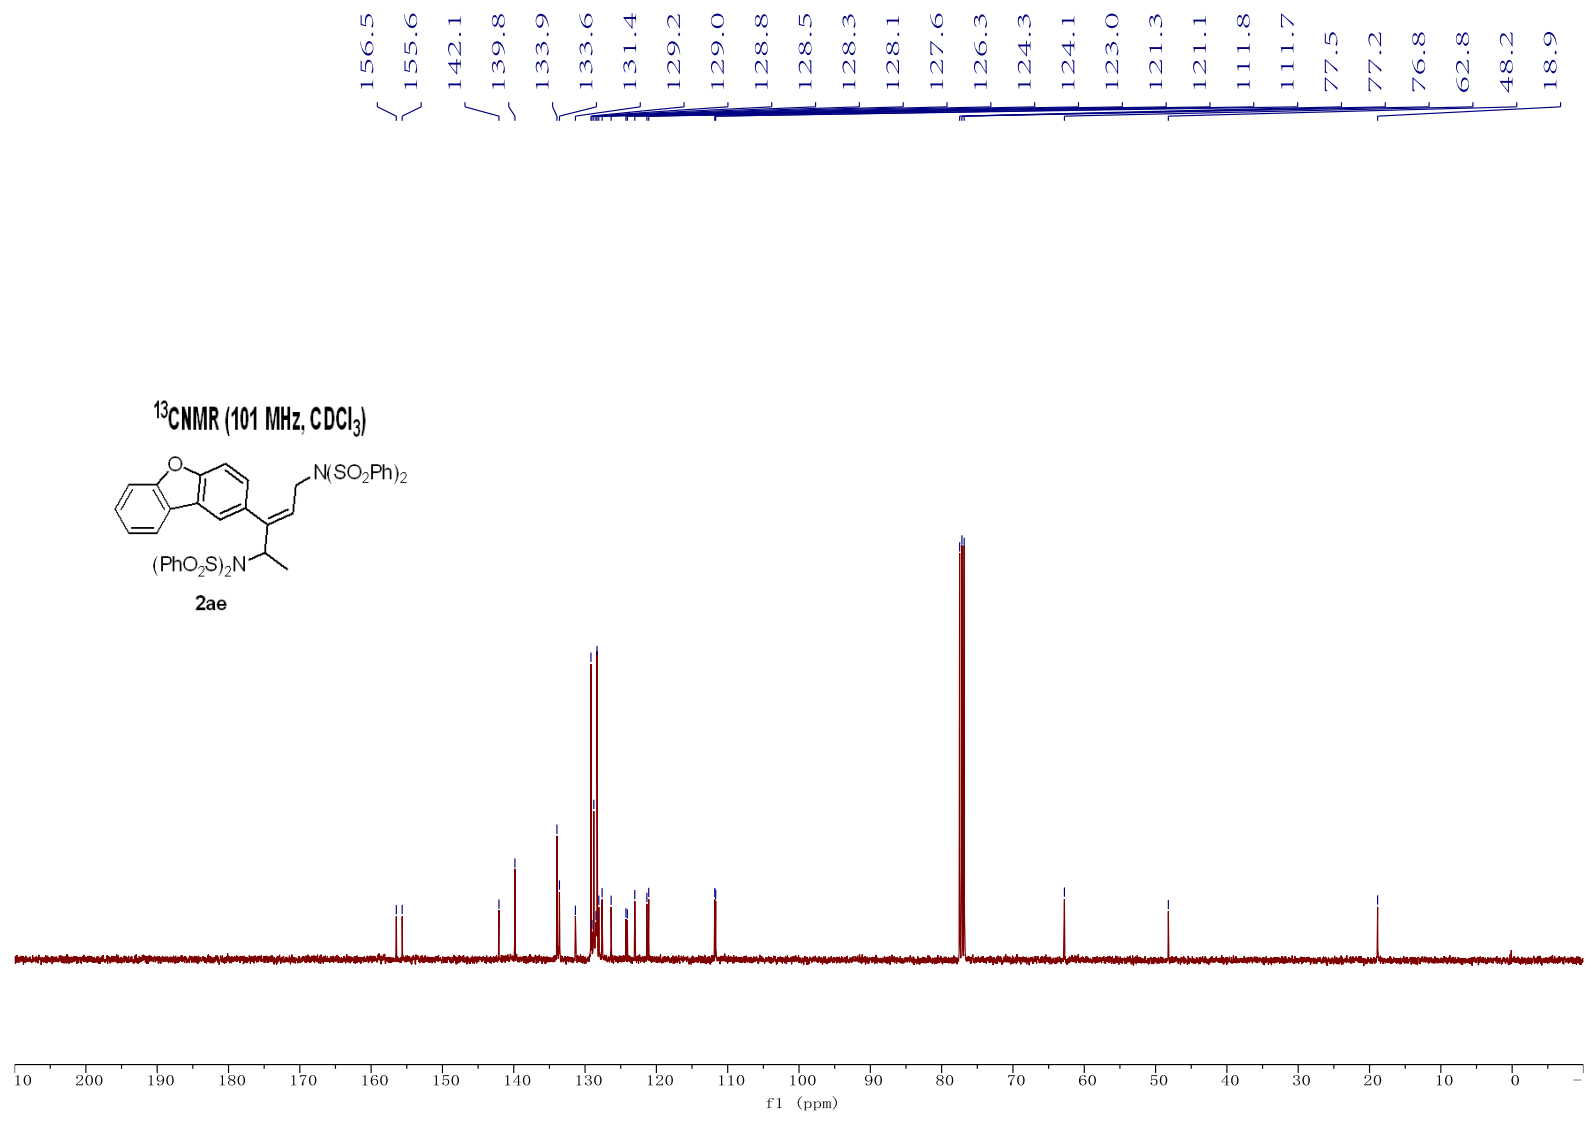

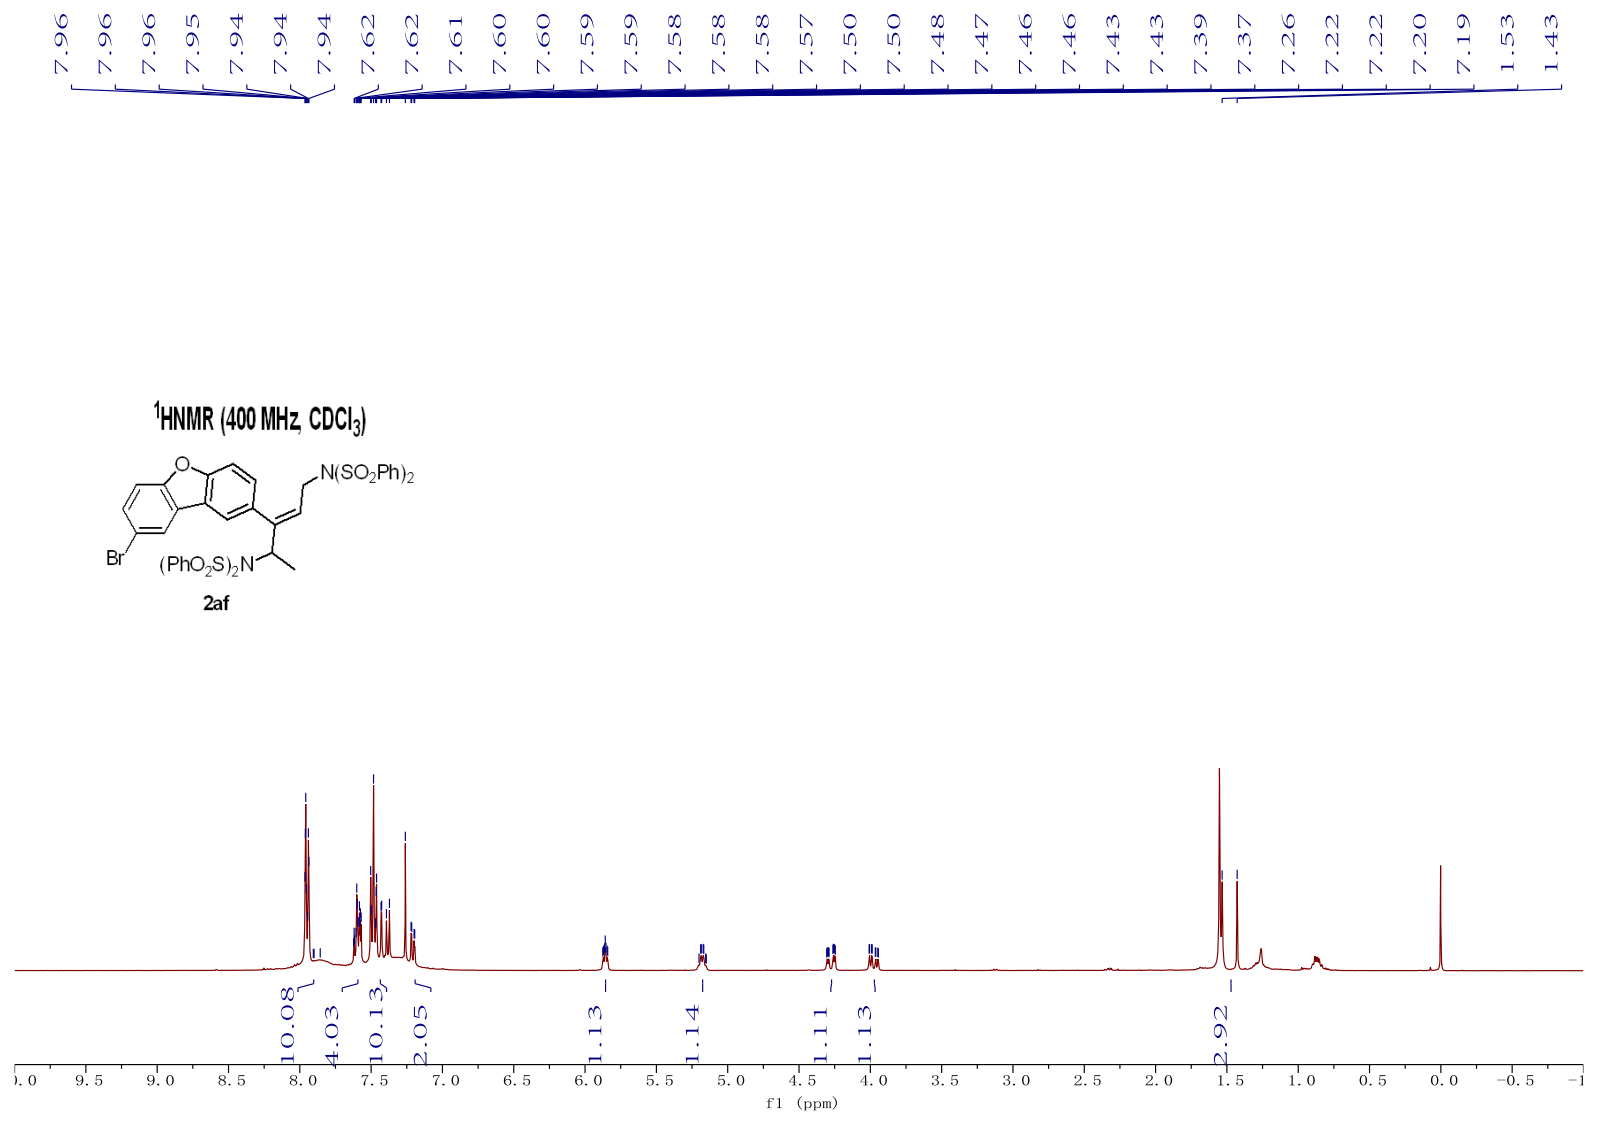

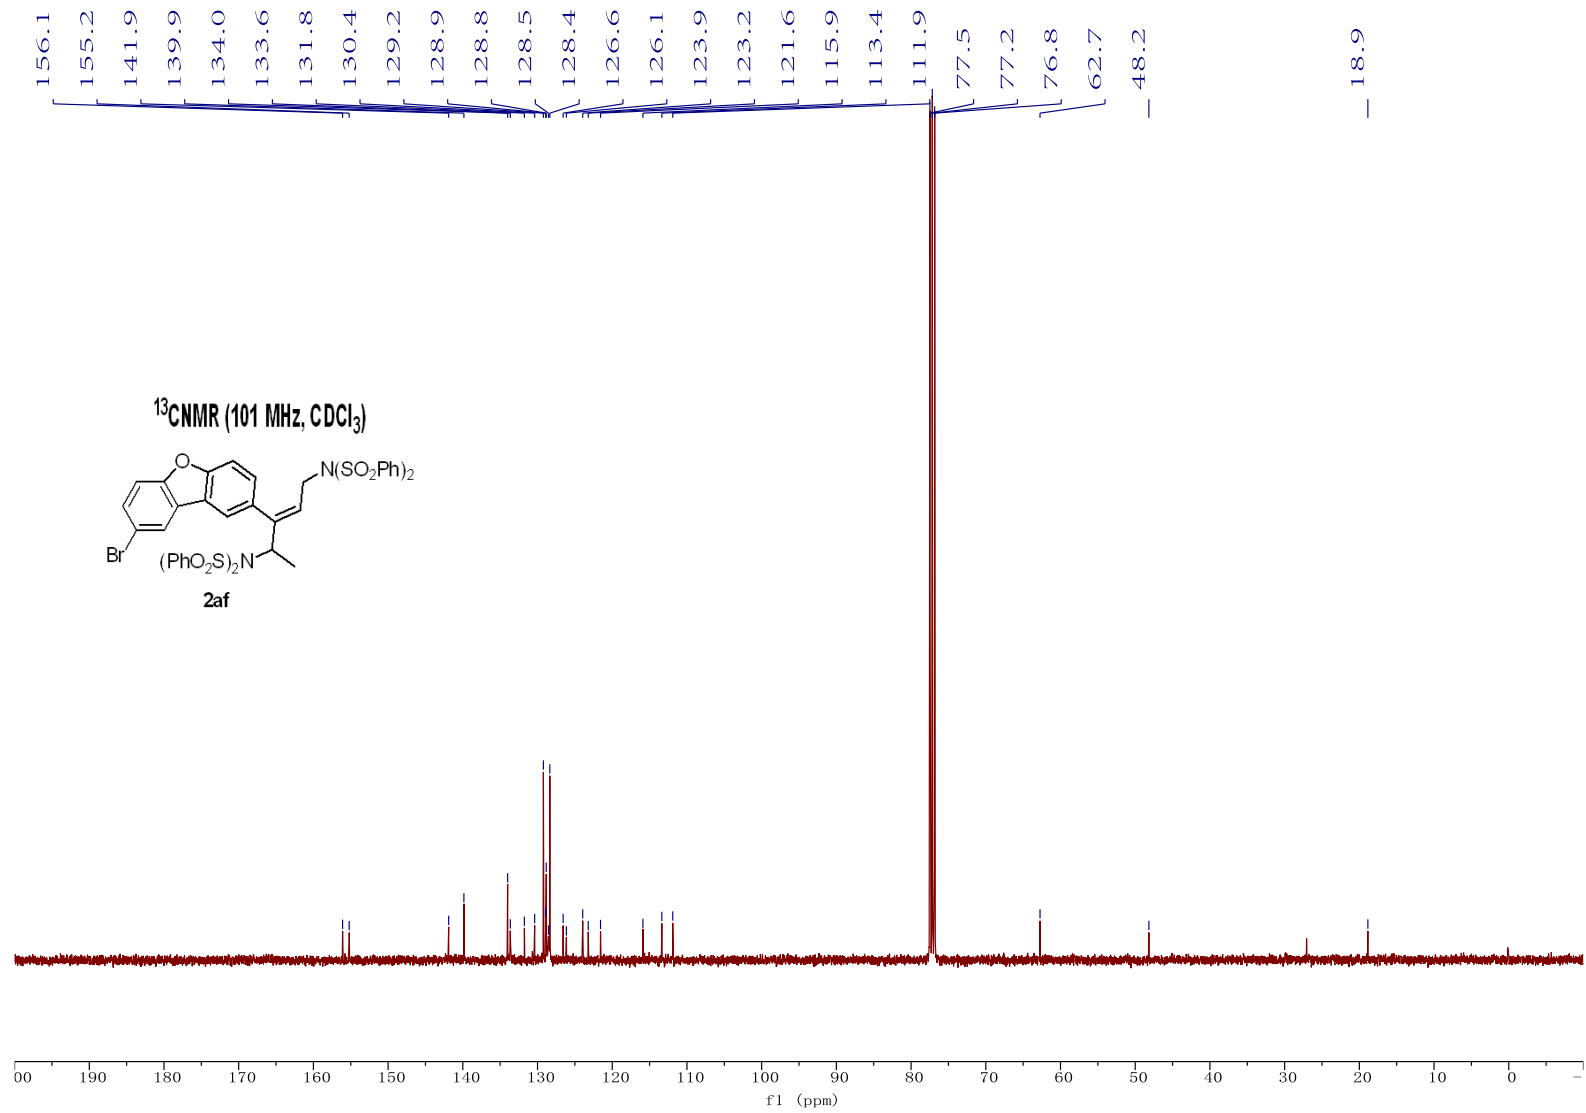

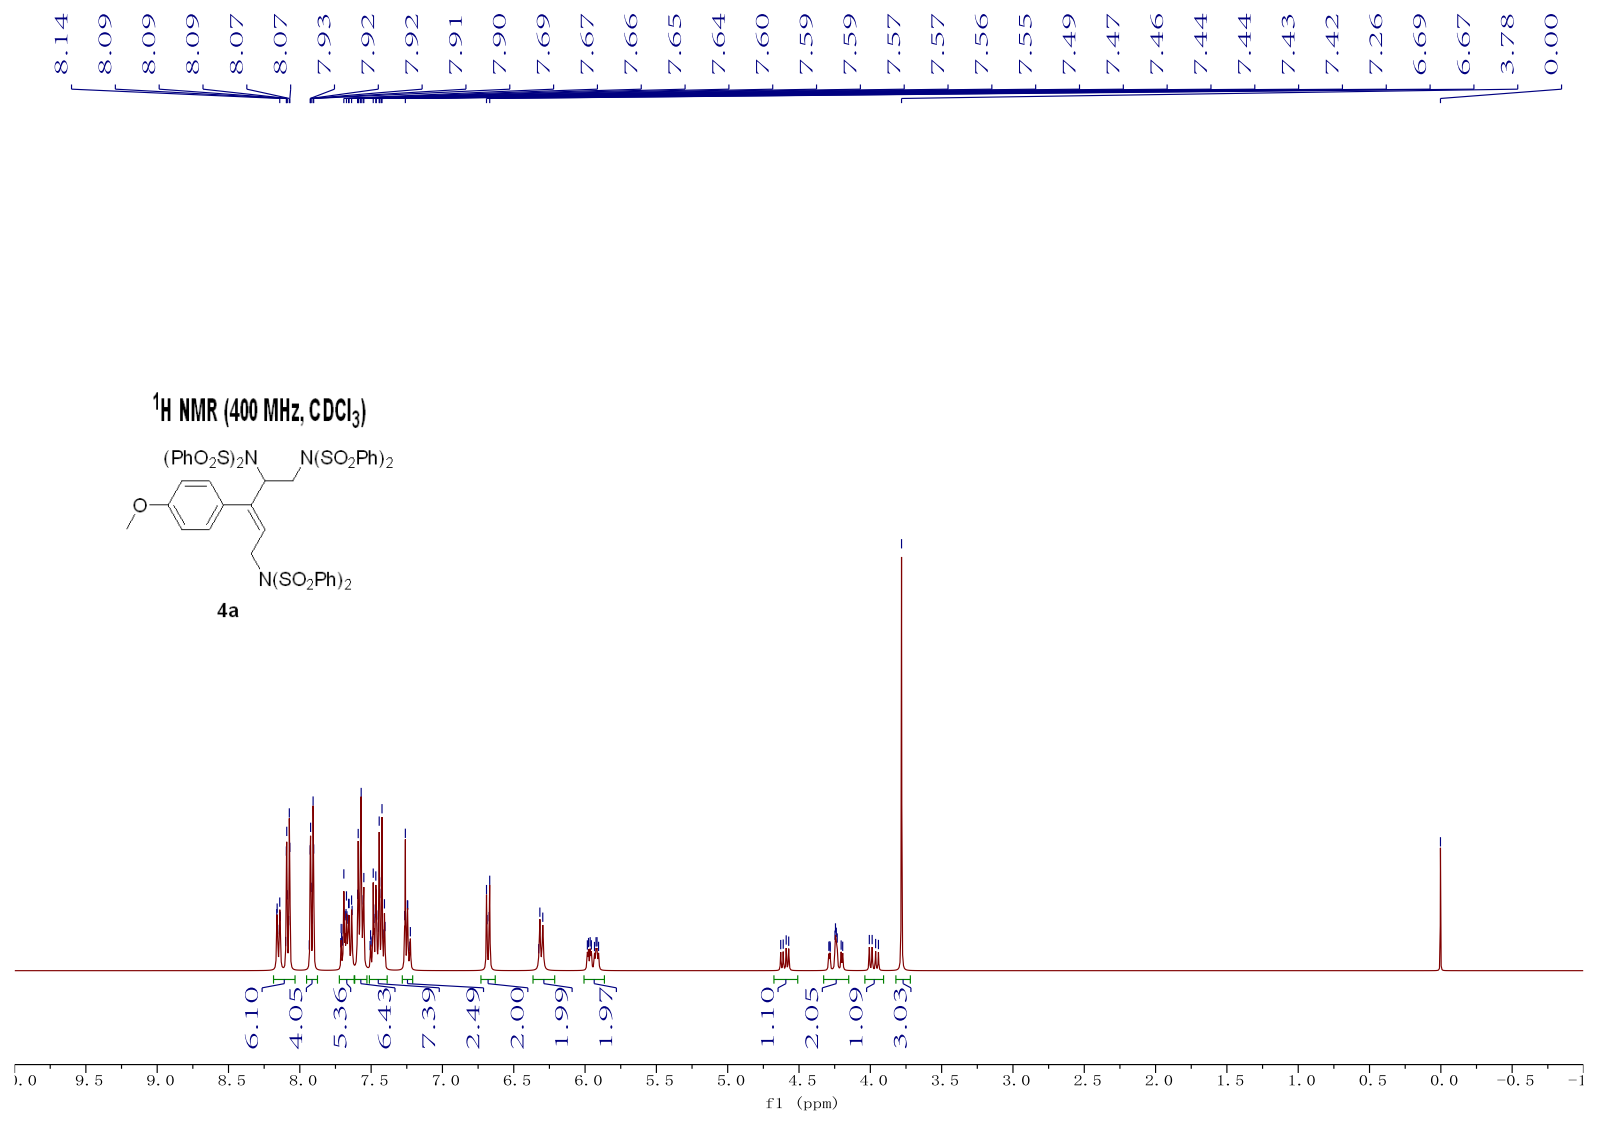

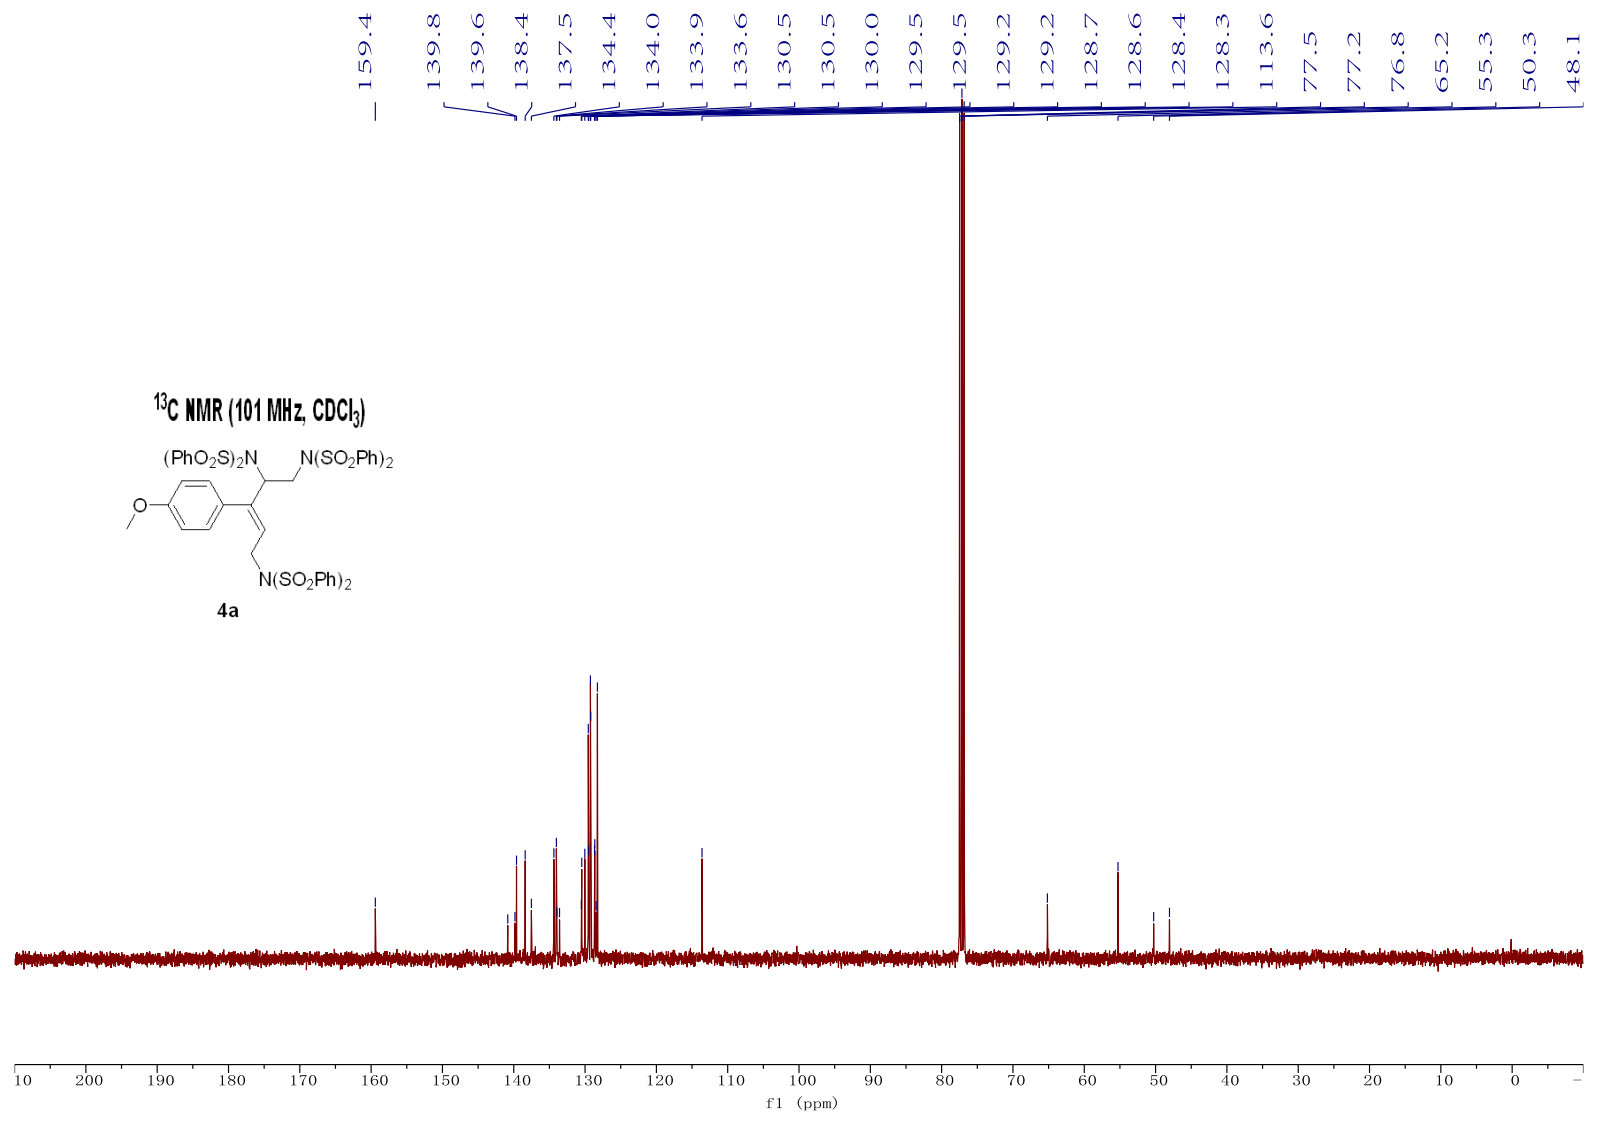



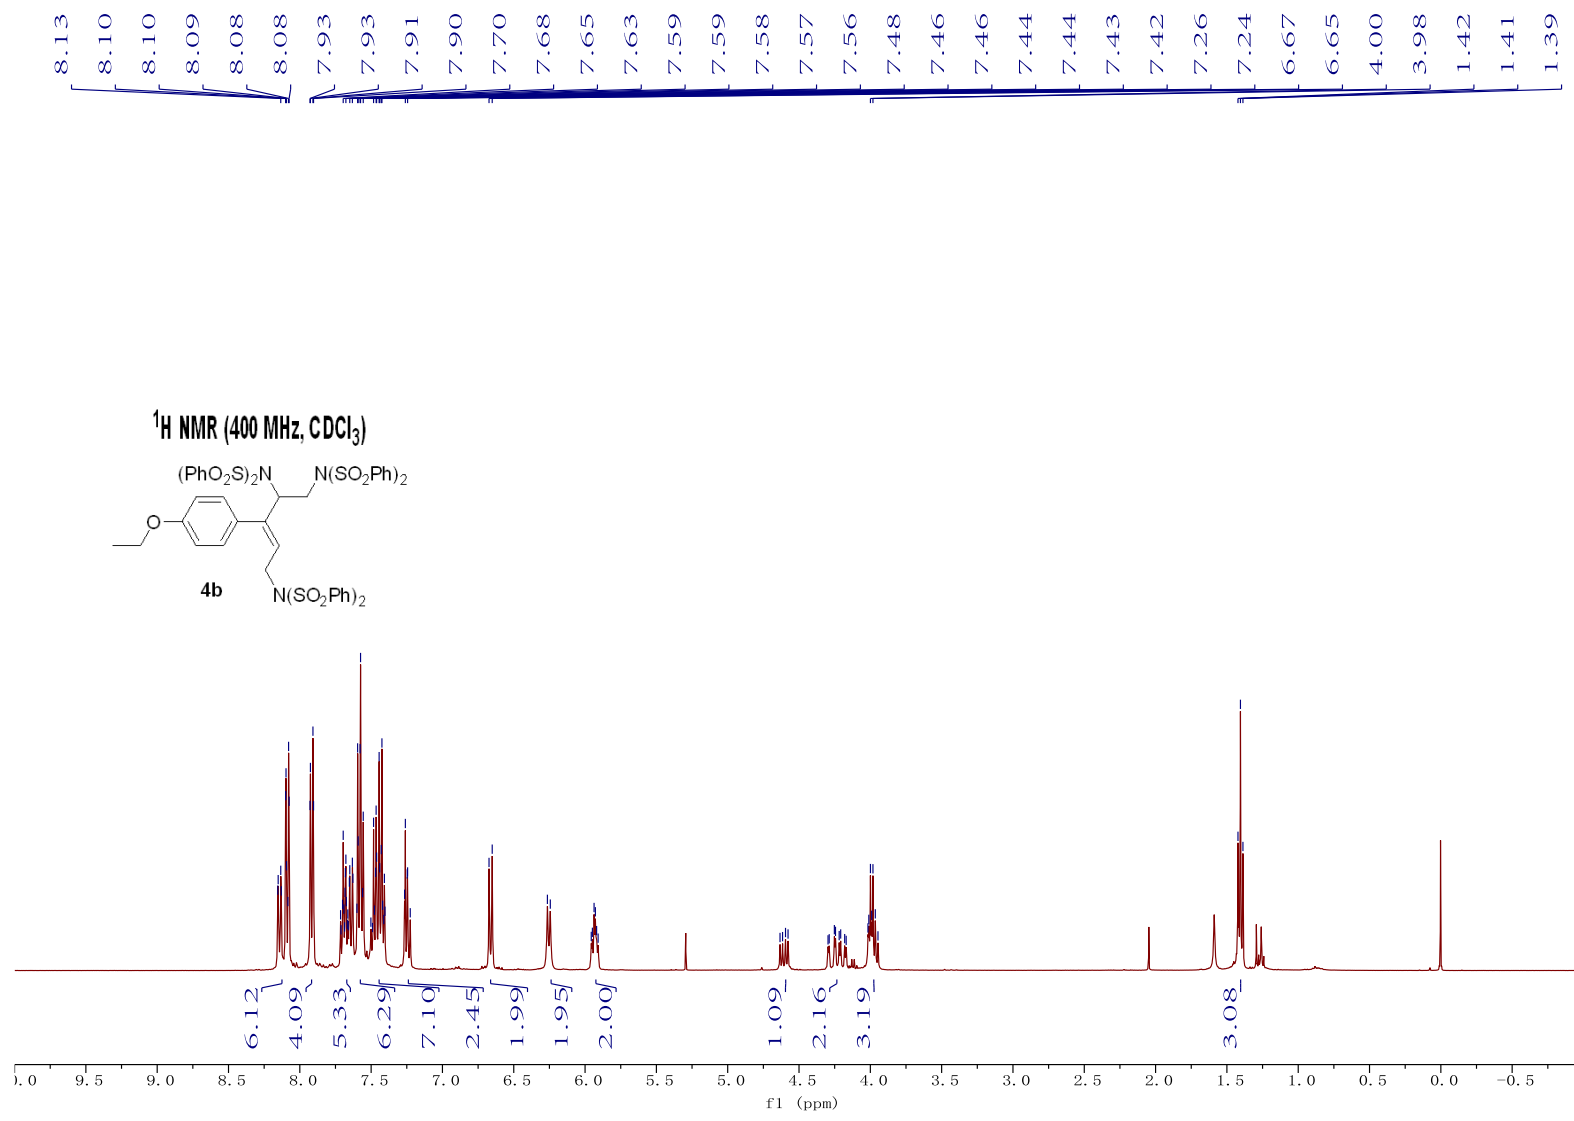

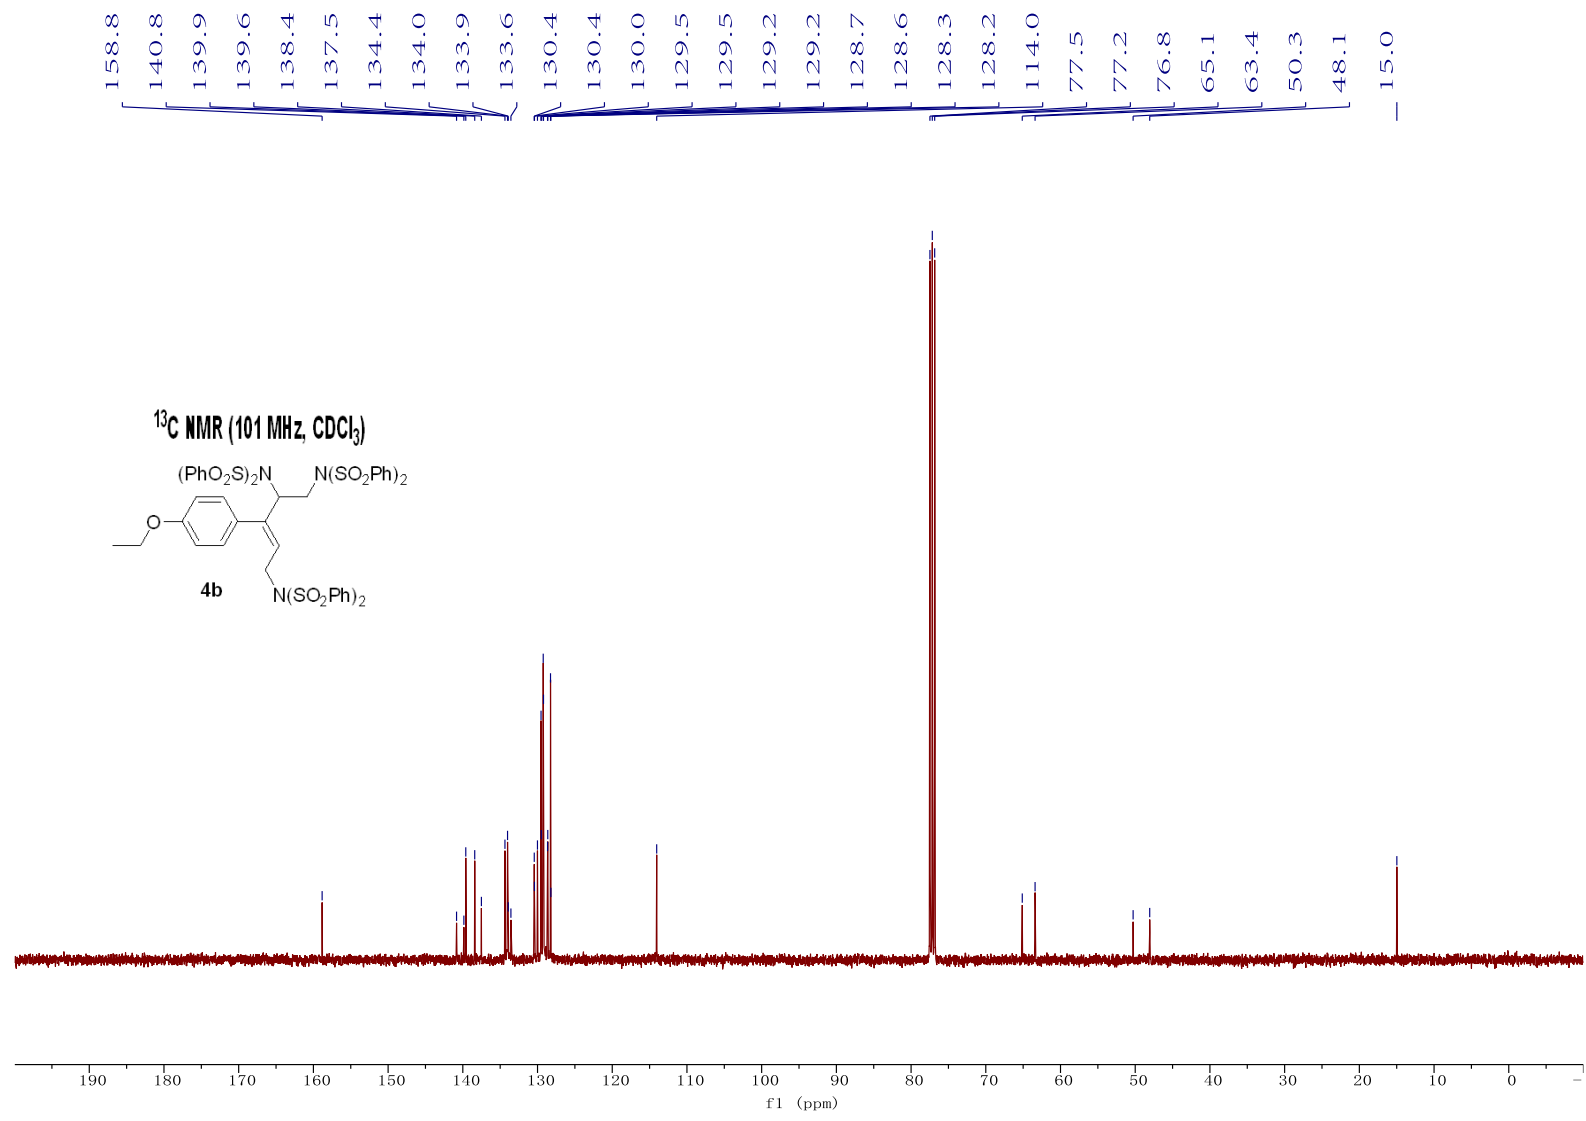

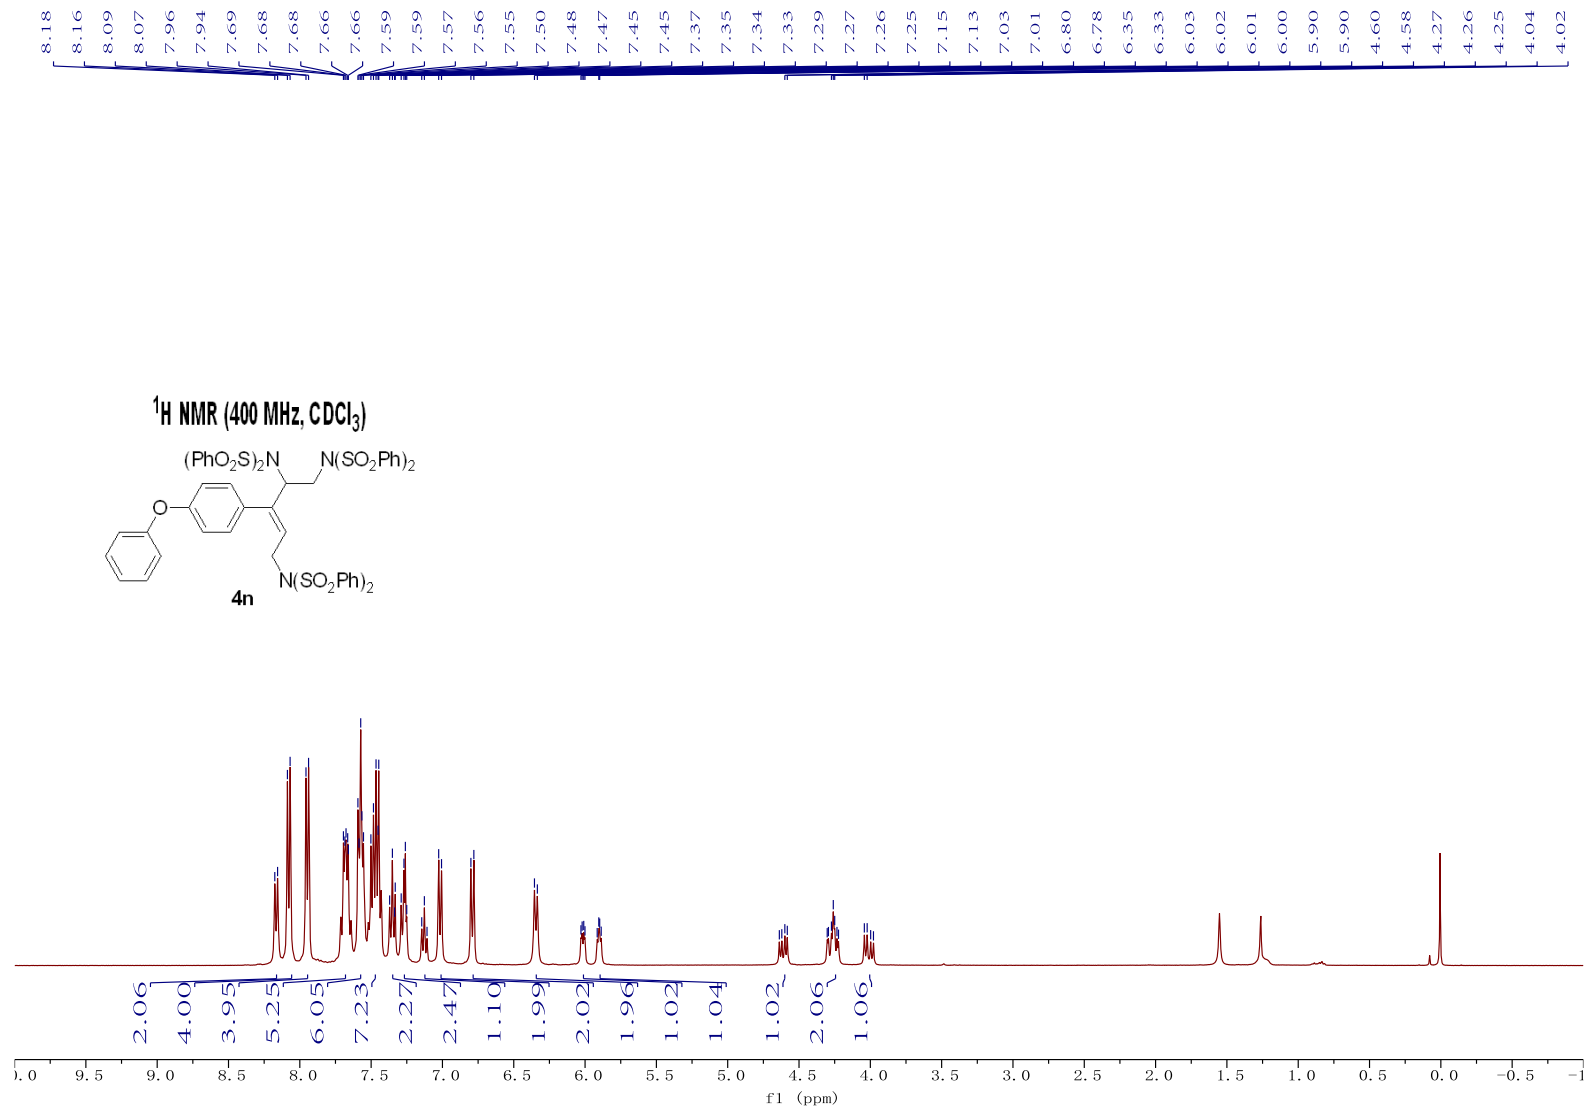

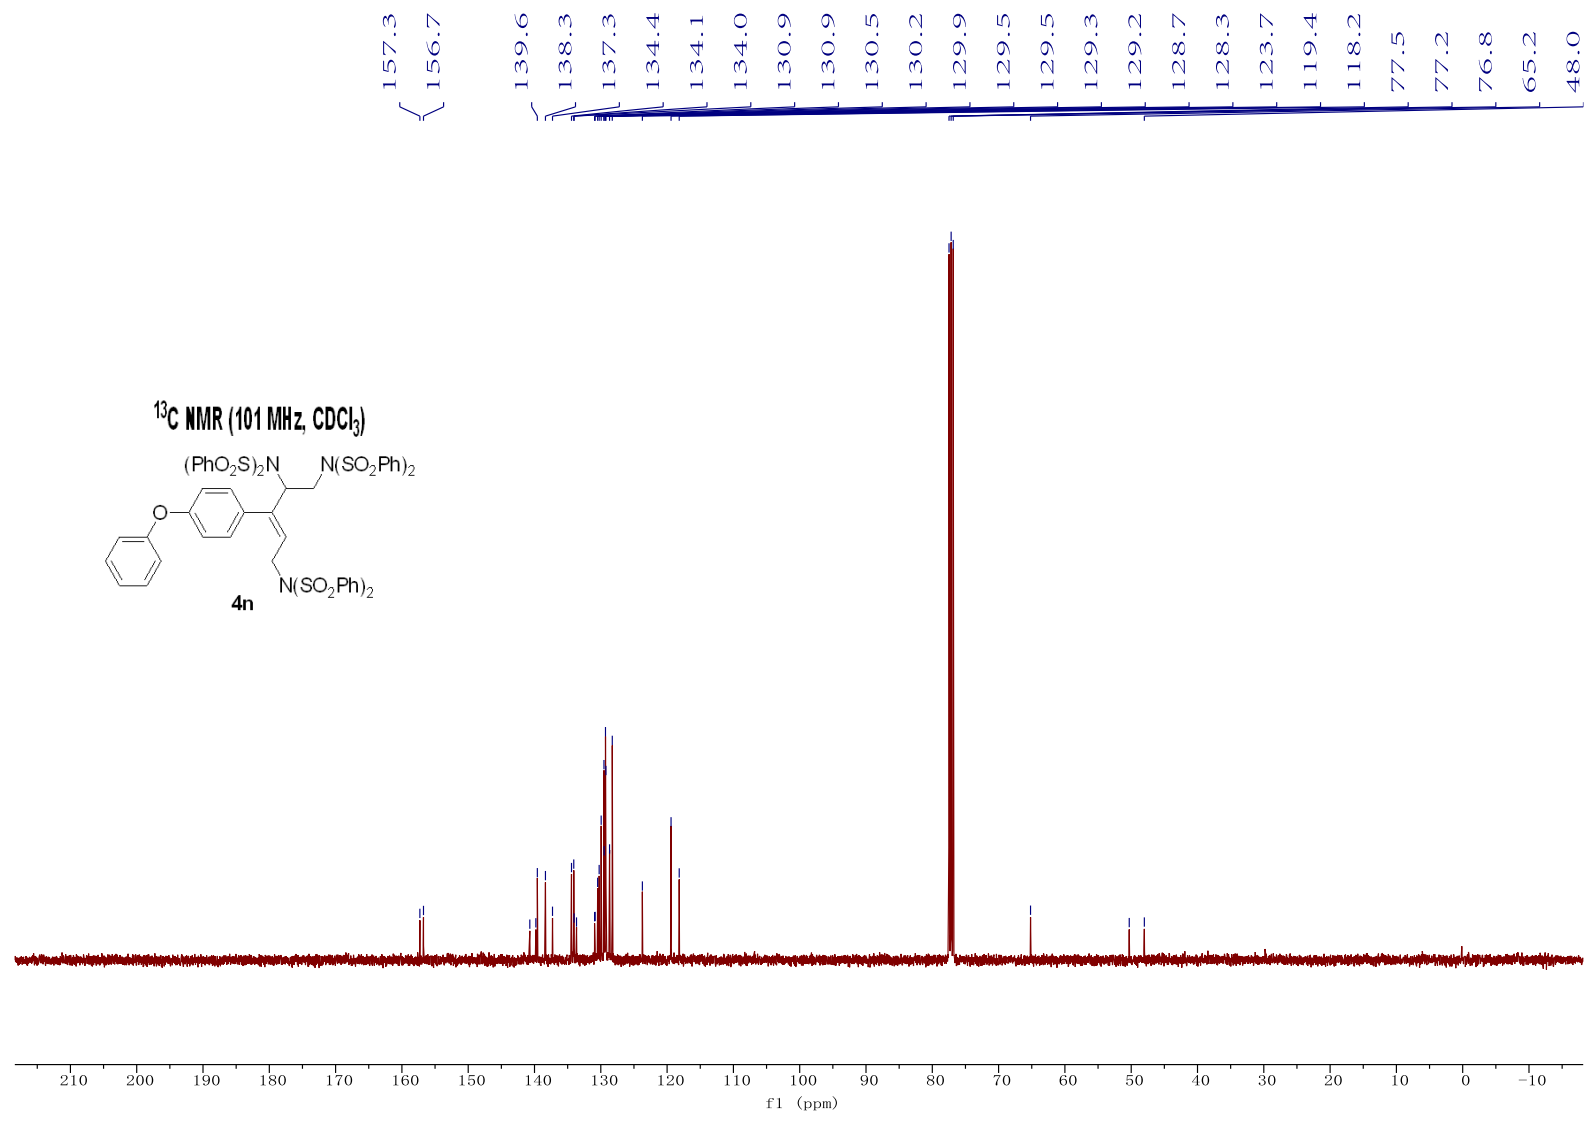

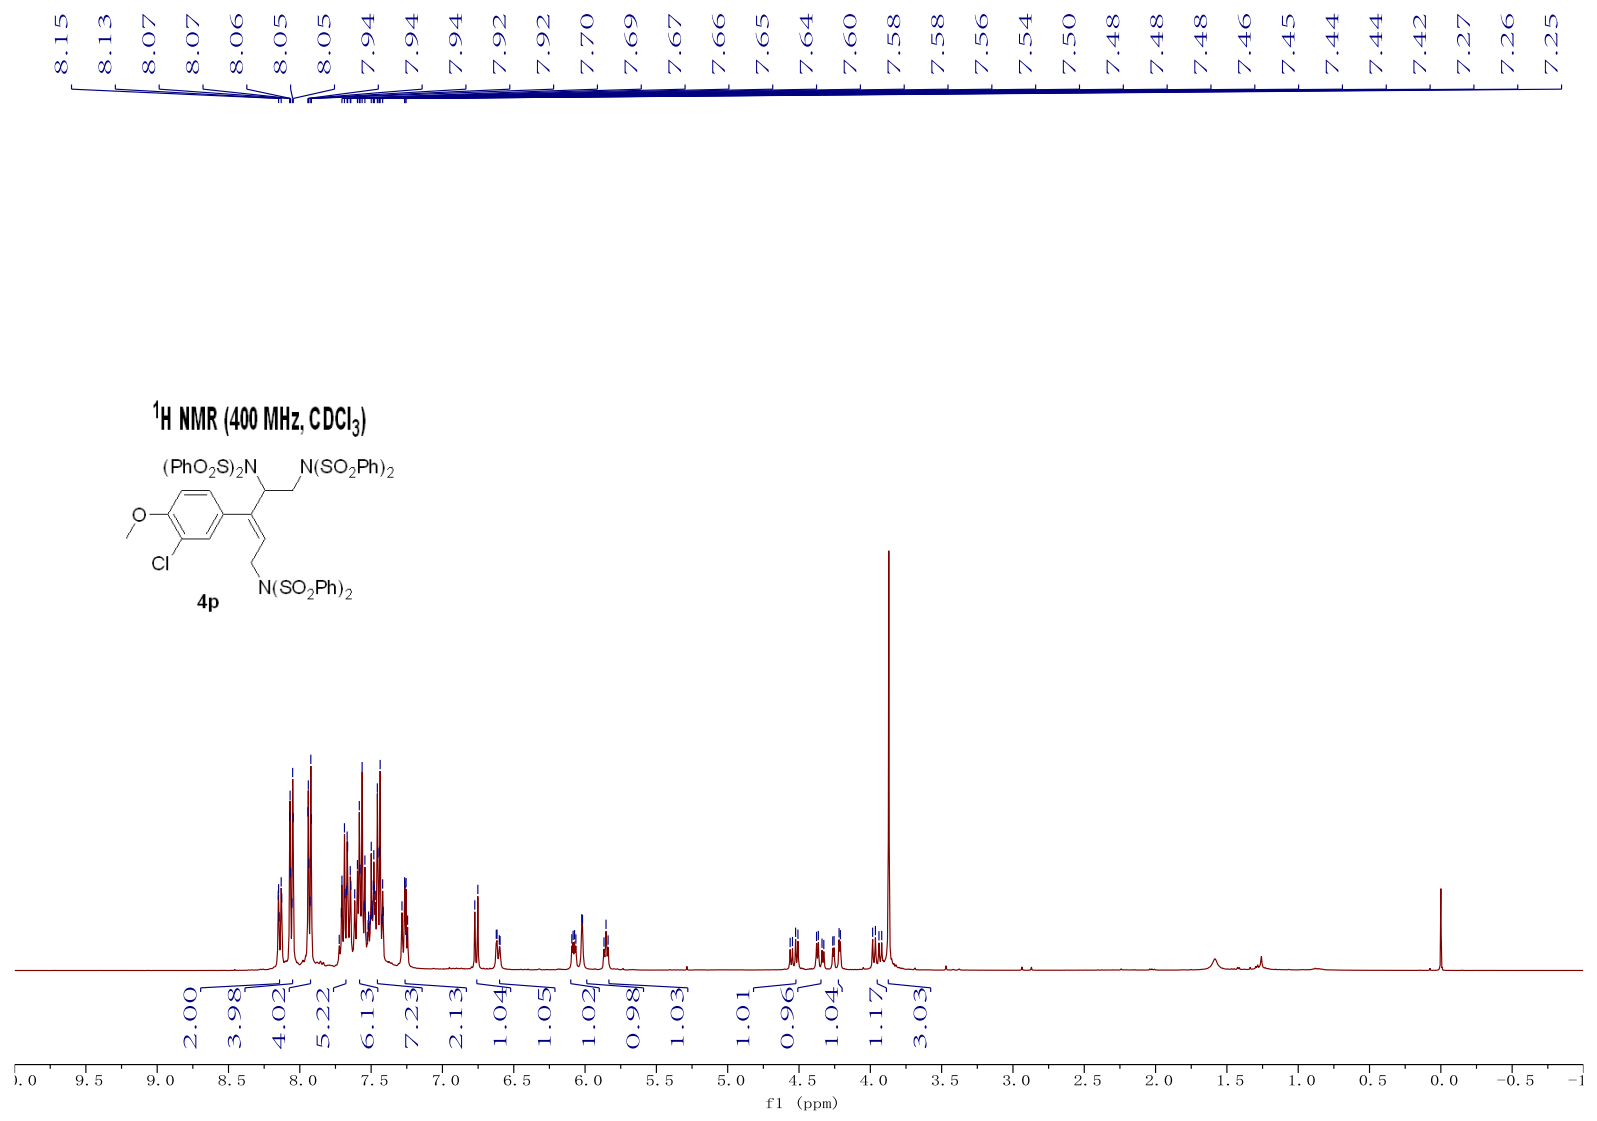

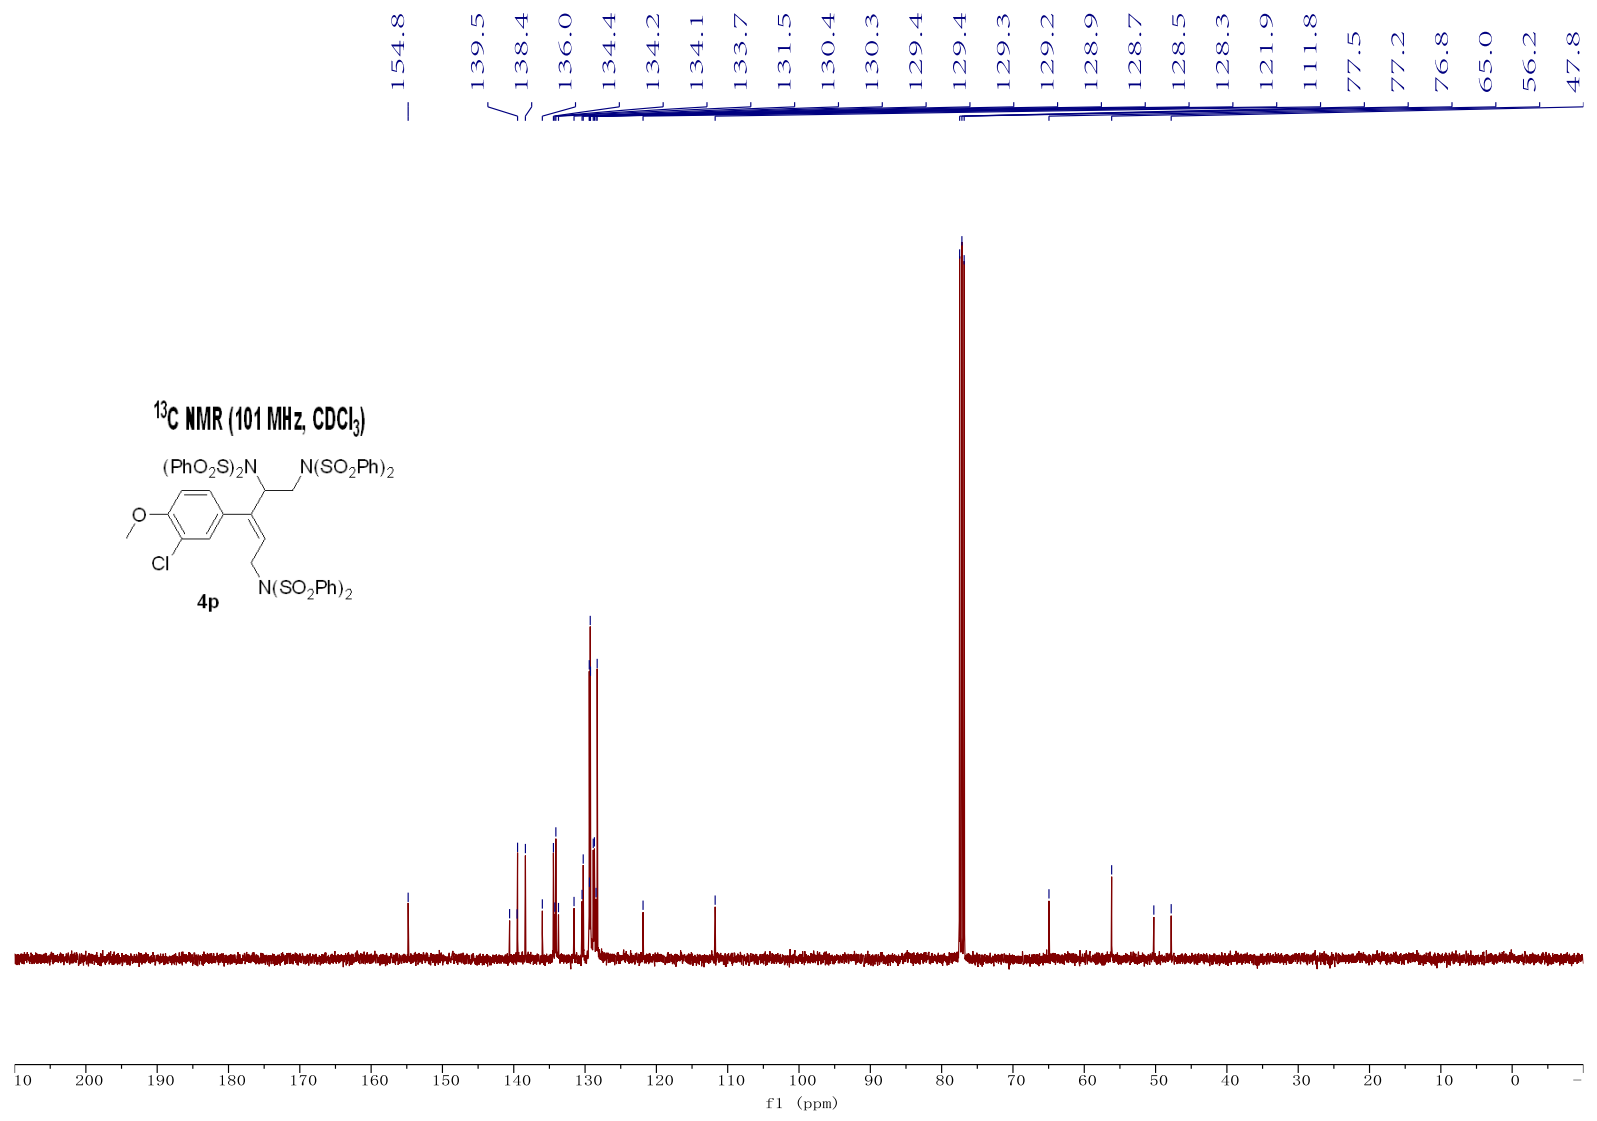

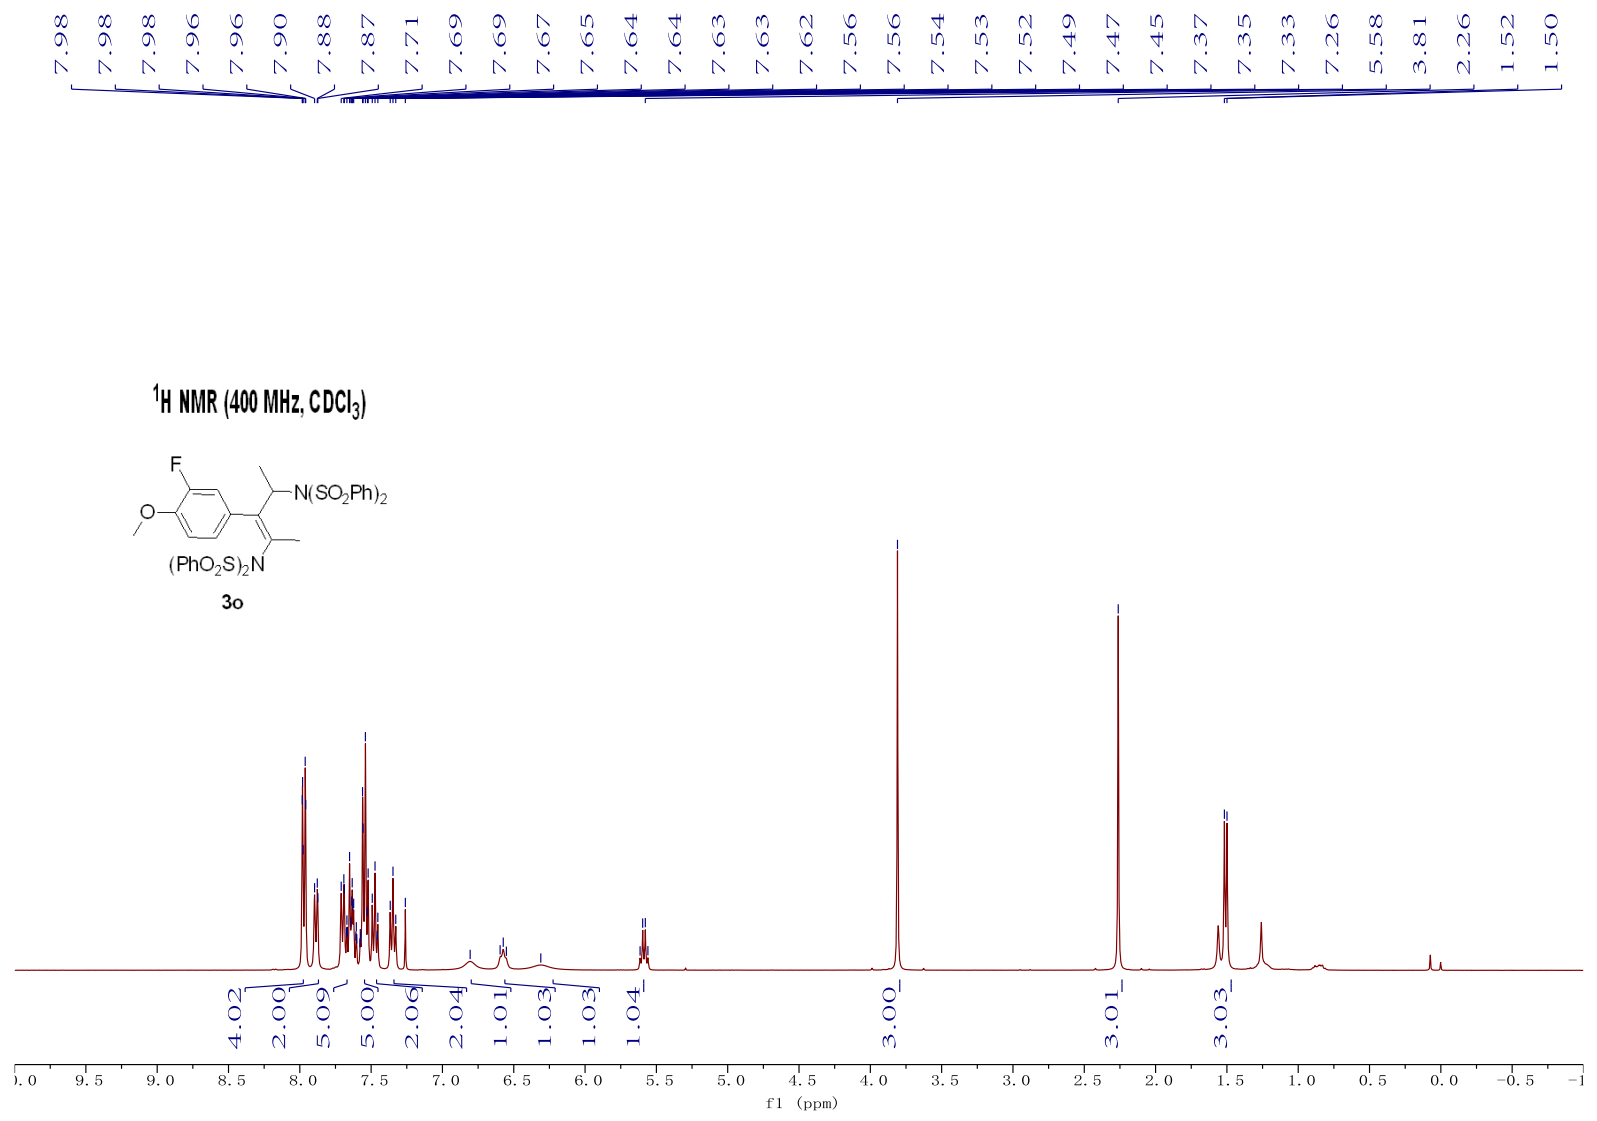

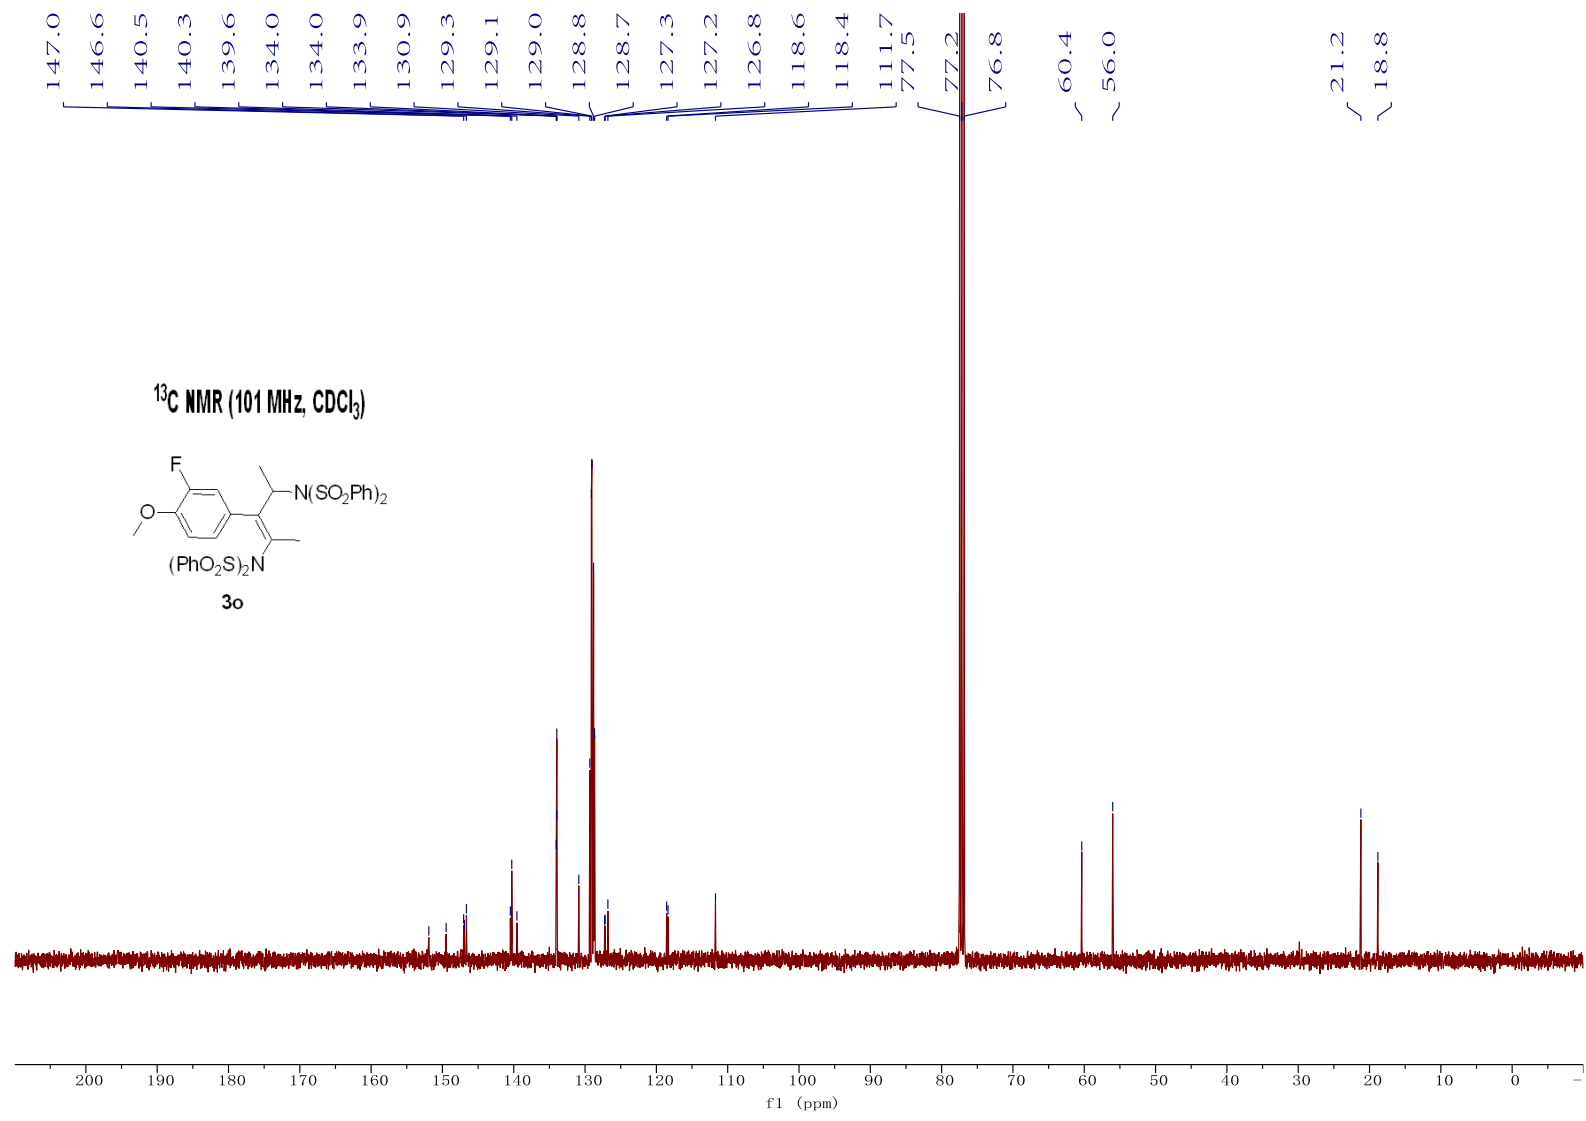



<sup>19</sup>F NMR (376 MHz, CDCl<sub>3</sub>)

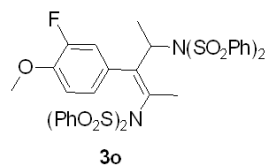

-135.1

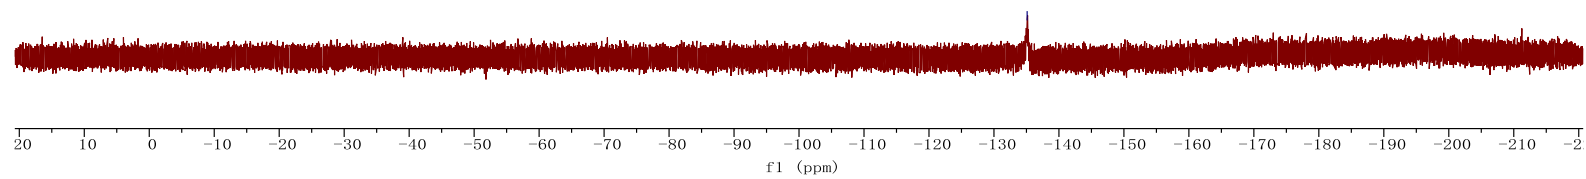

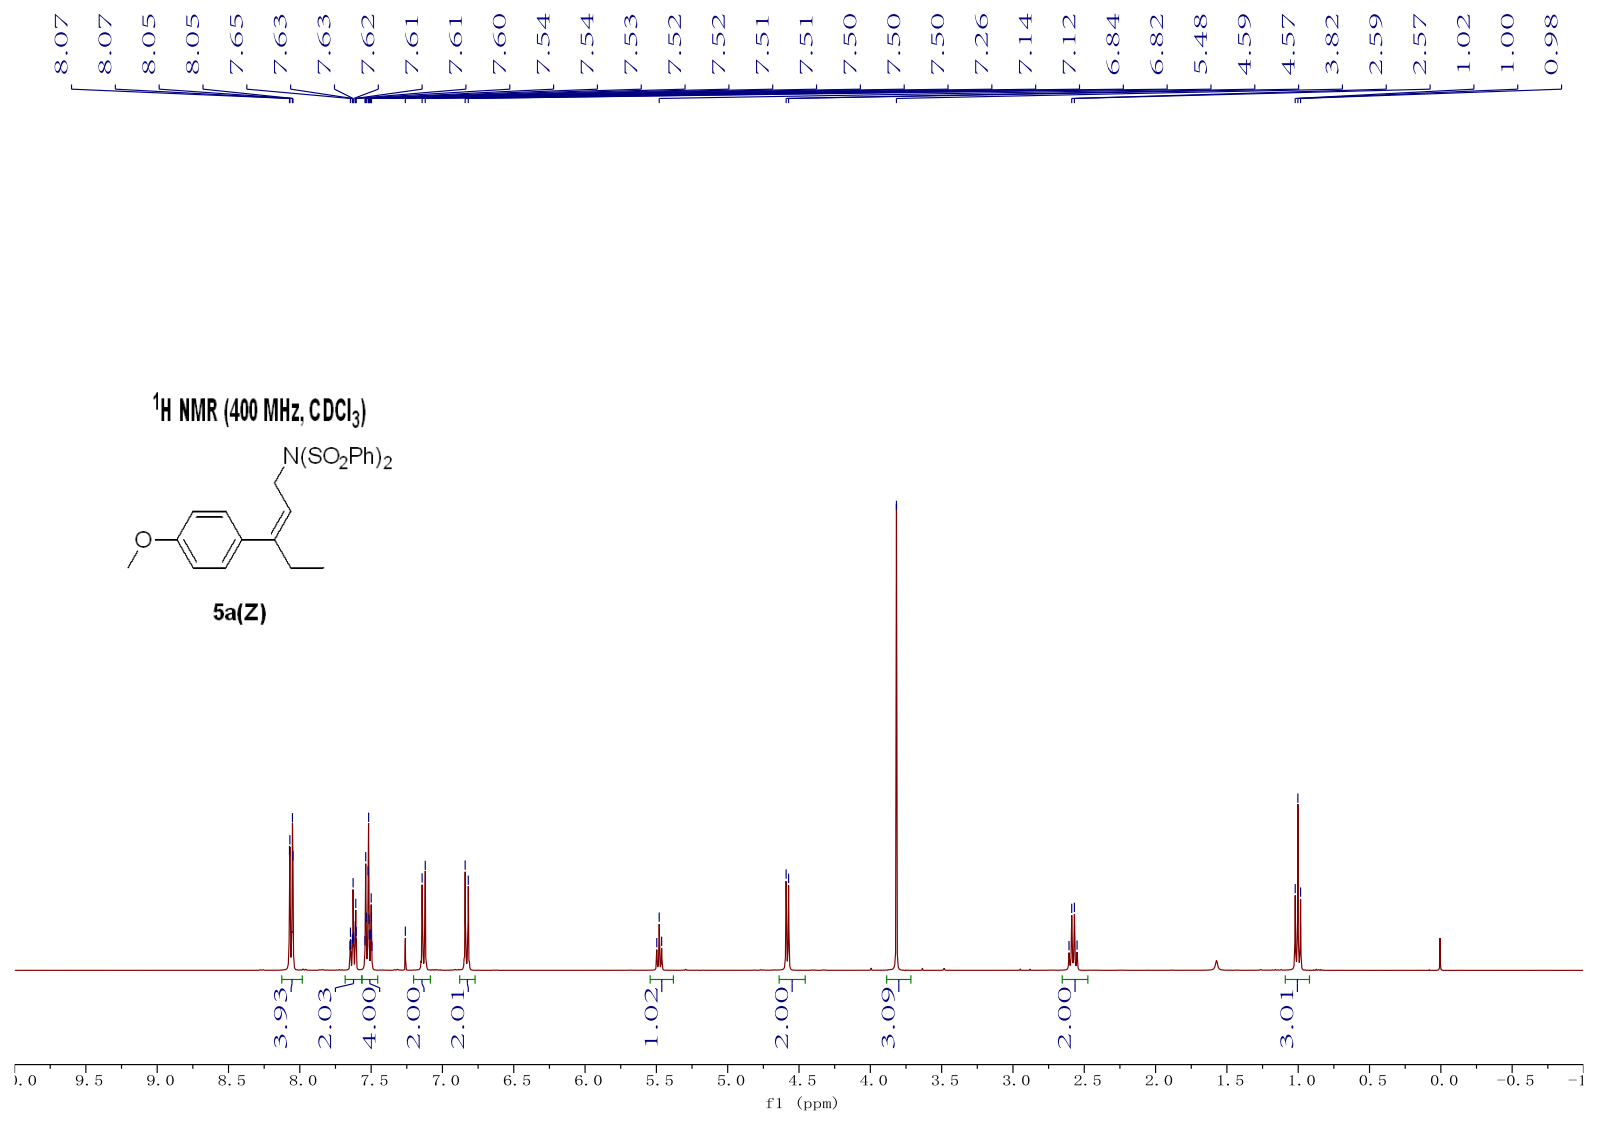

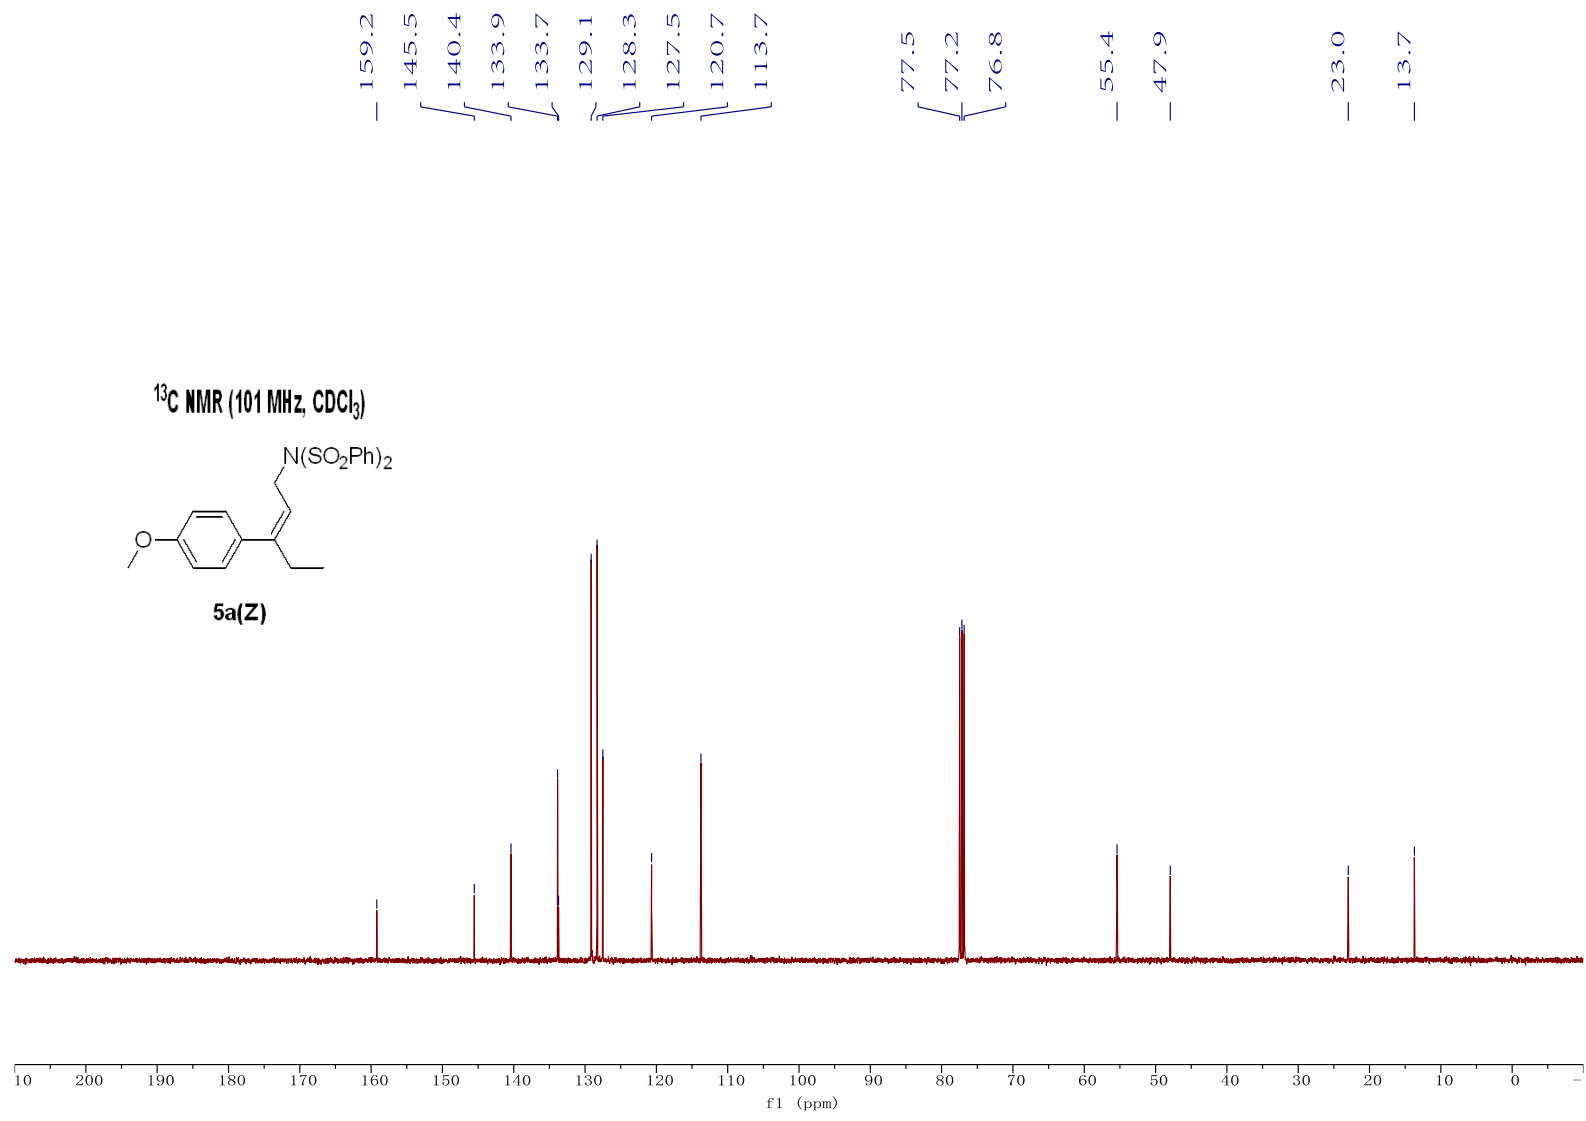

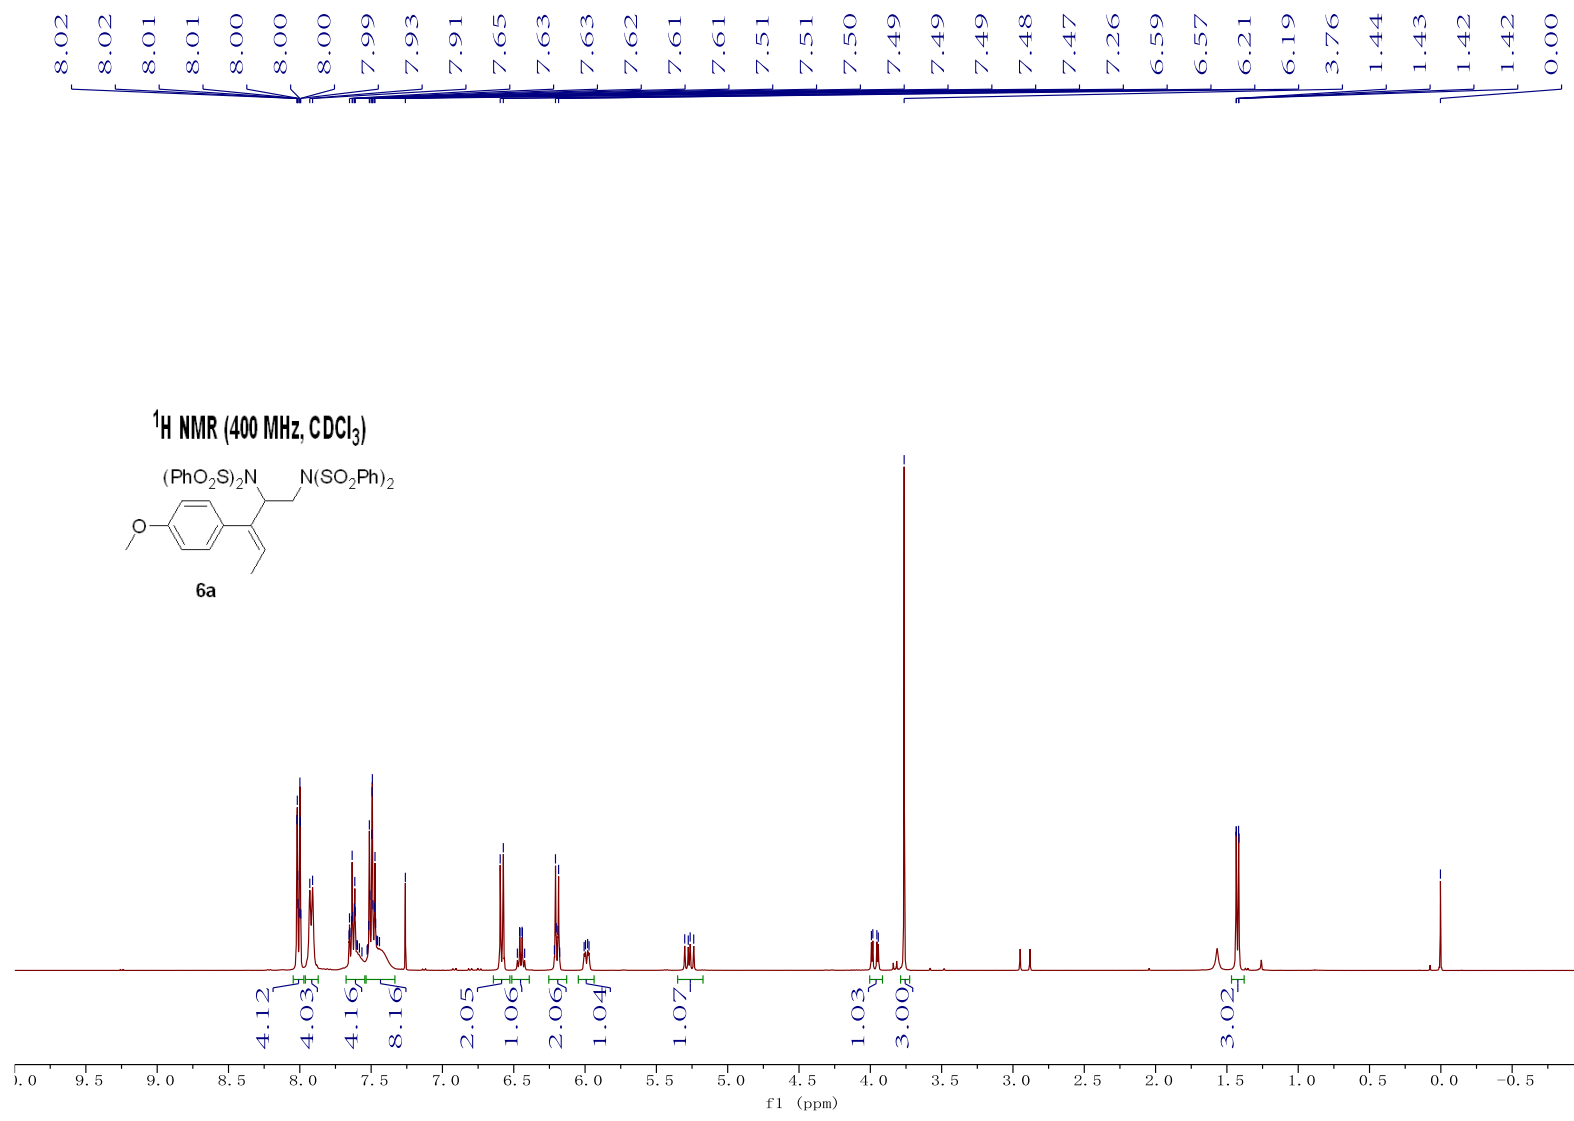

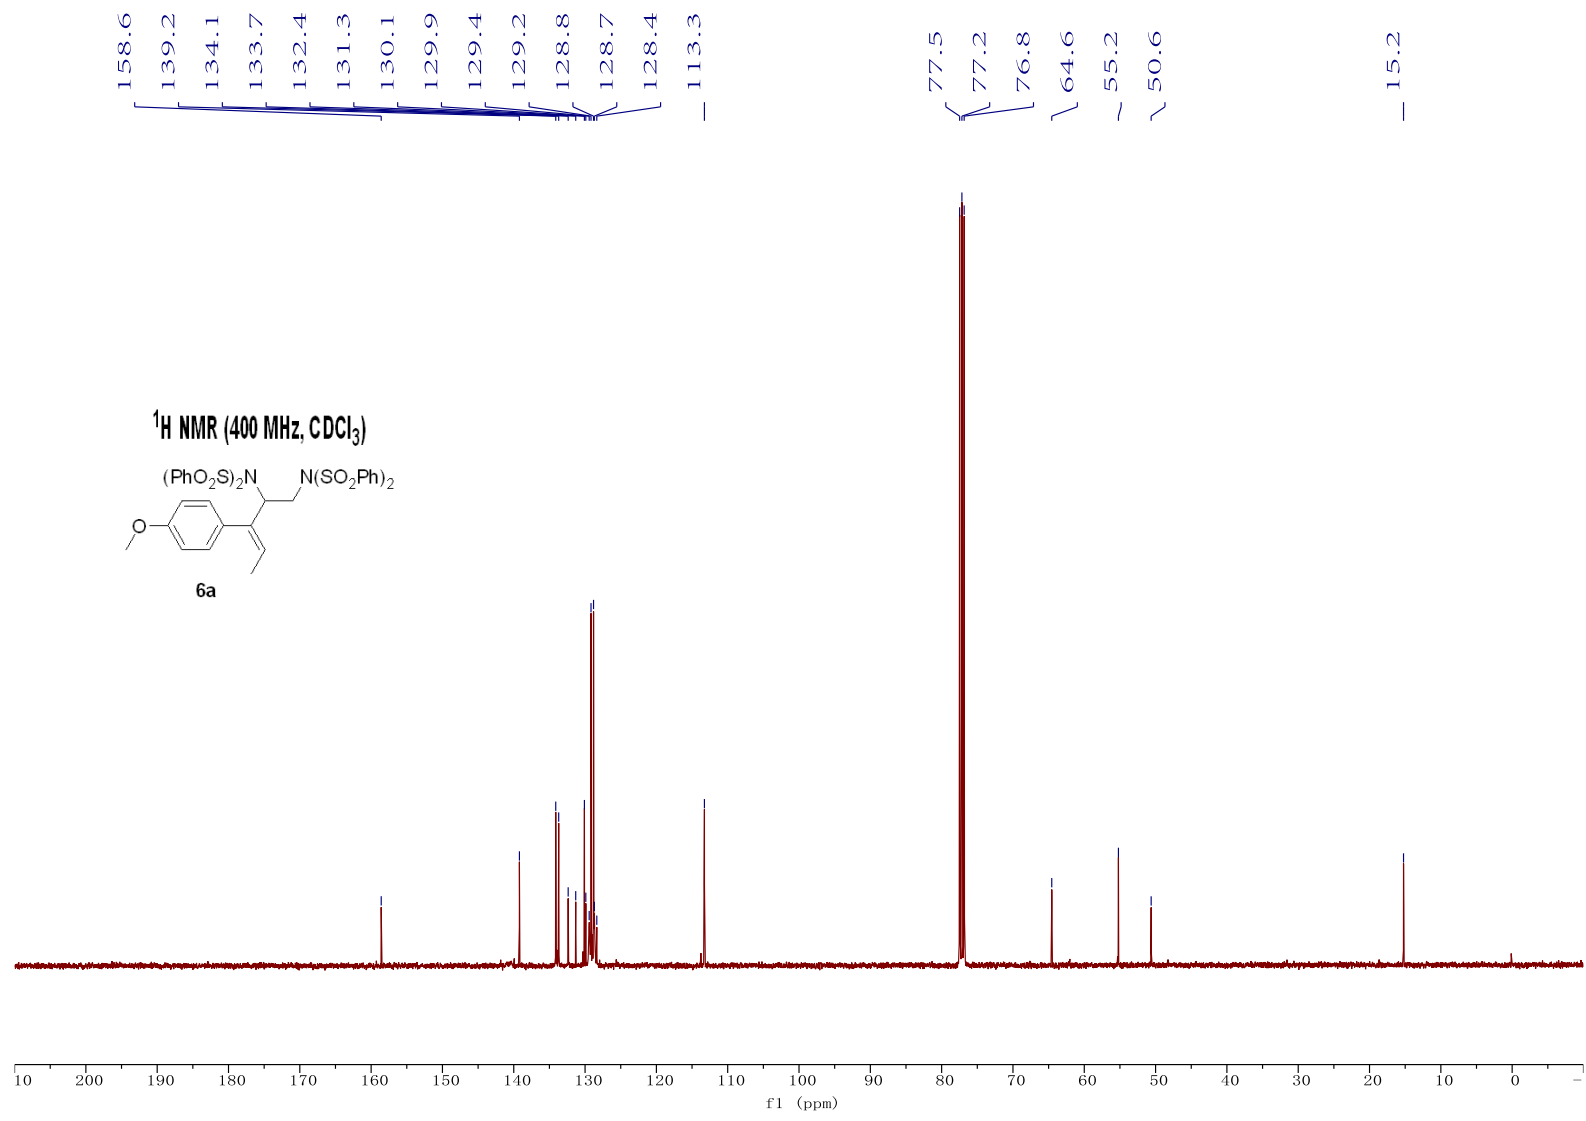

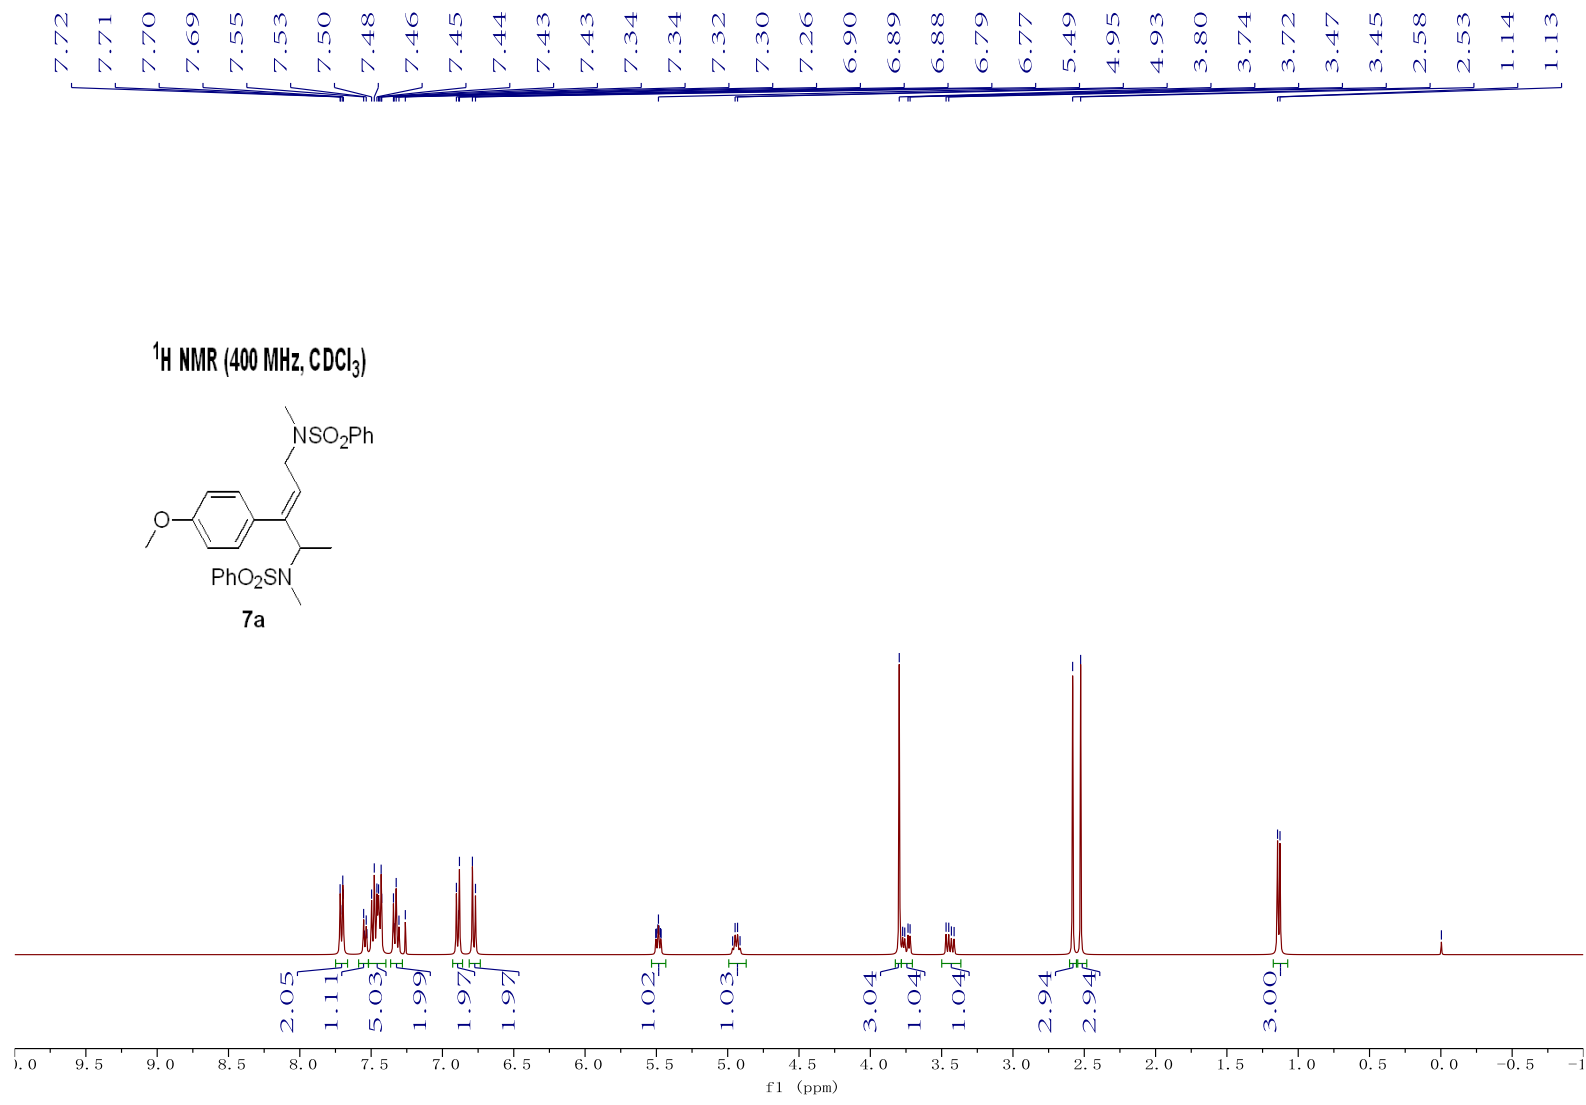

<sup>13</sup>C NMR (101 MHz, CDCl<sub>3</sub>)

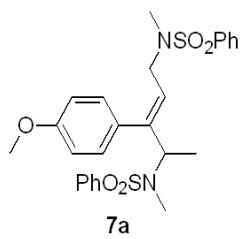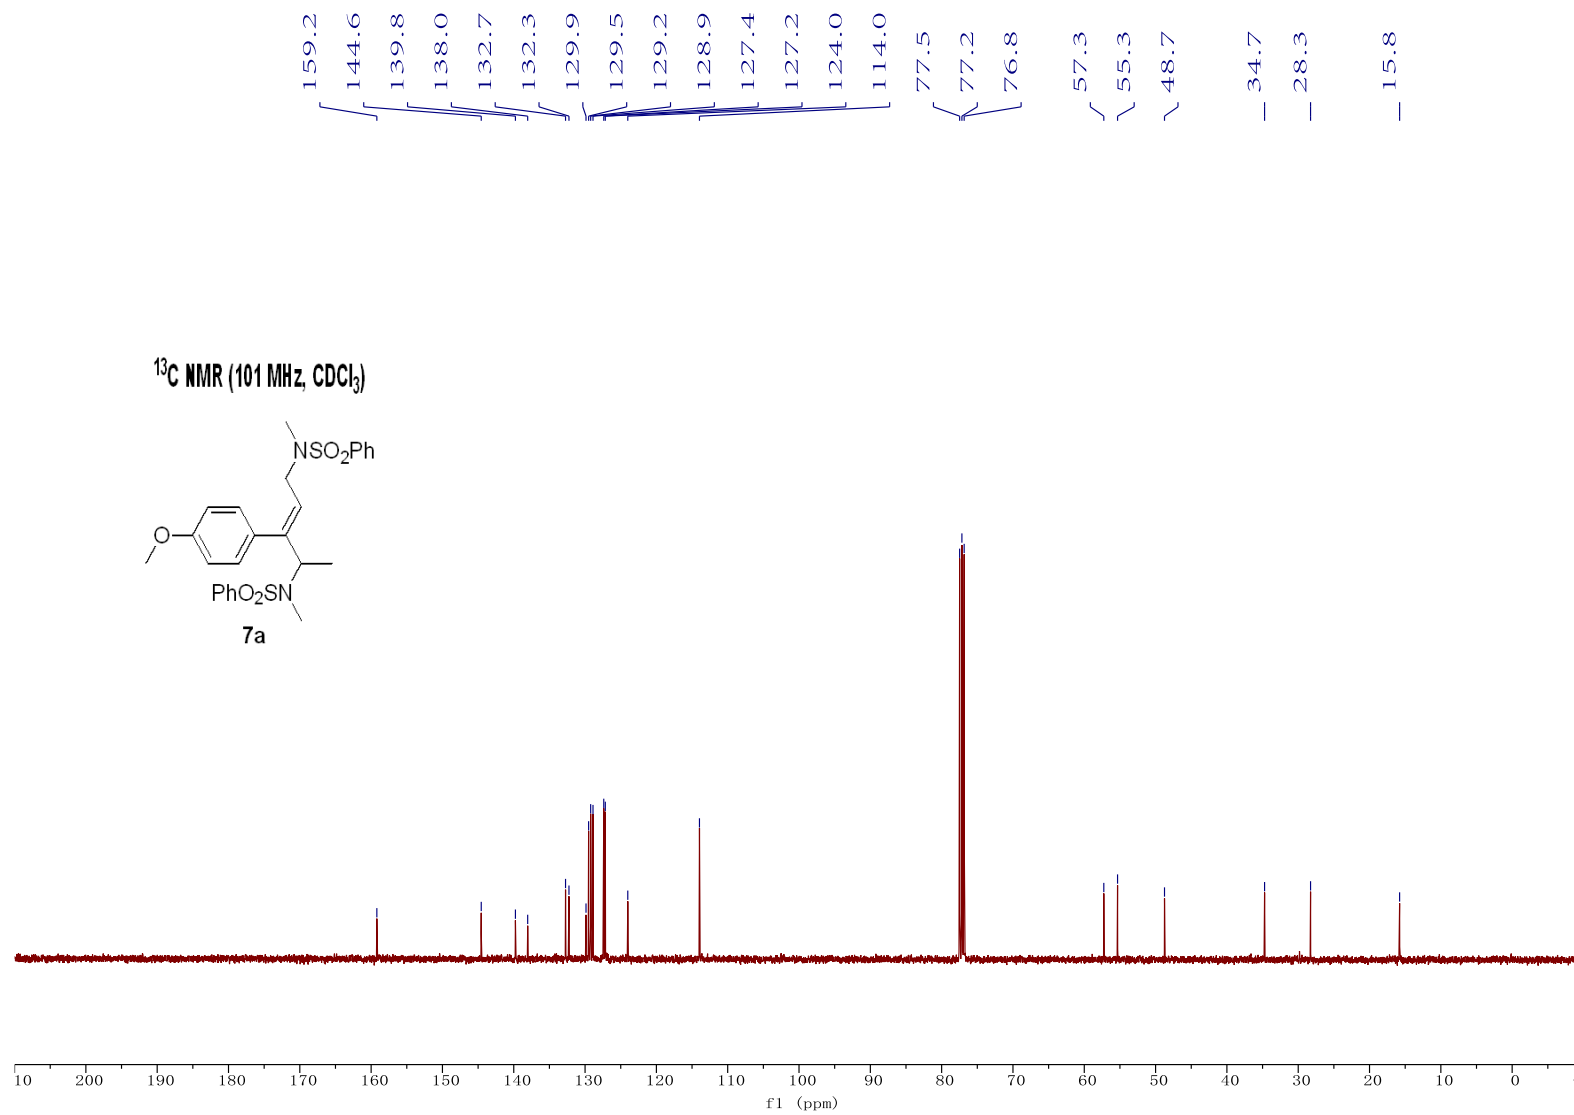

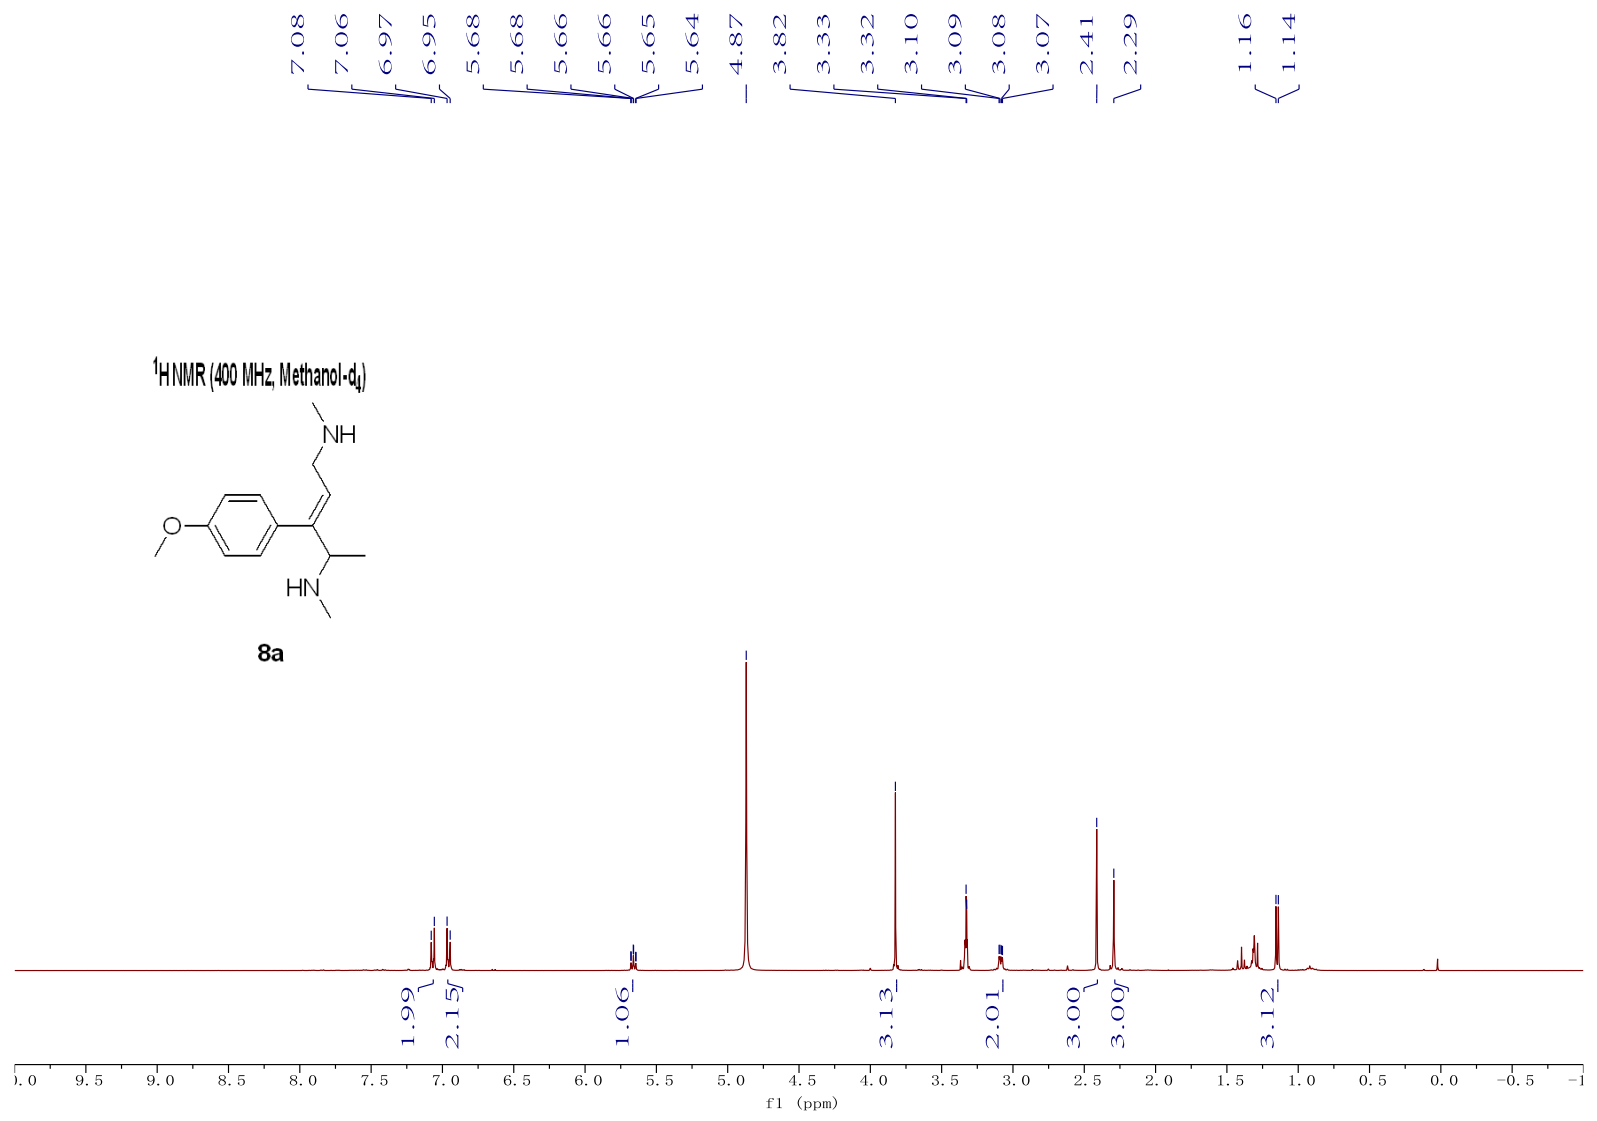



<sup>13</sup>C NMR (101 MHz, Methanol-d<sub>4</sub>)

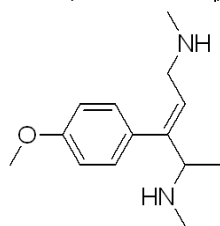

8a

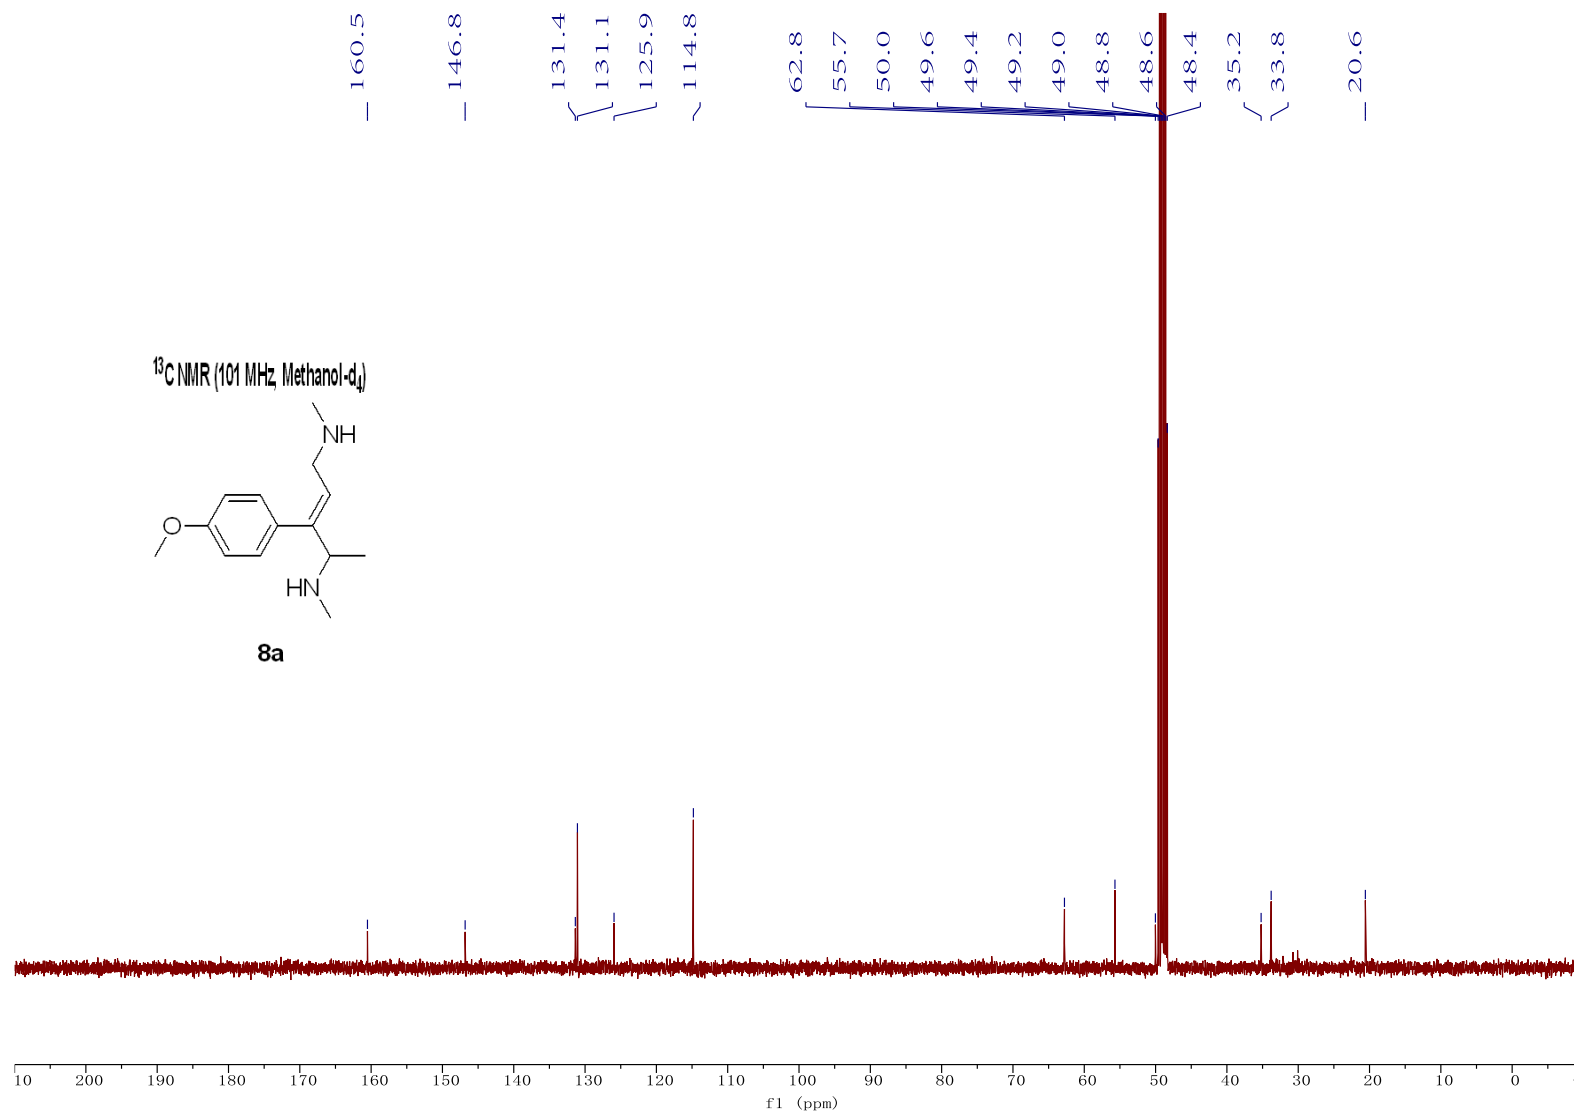

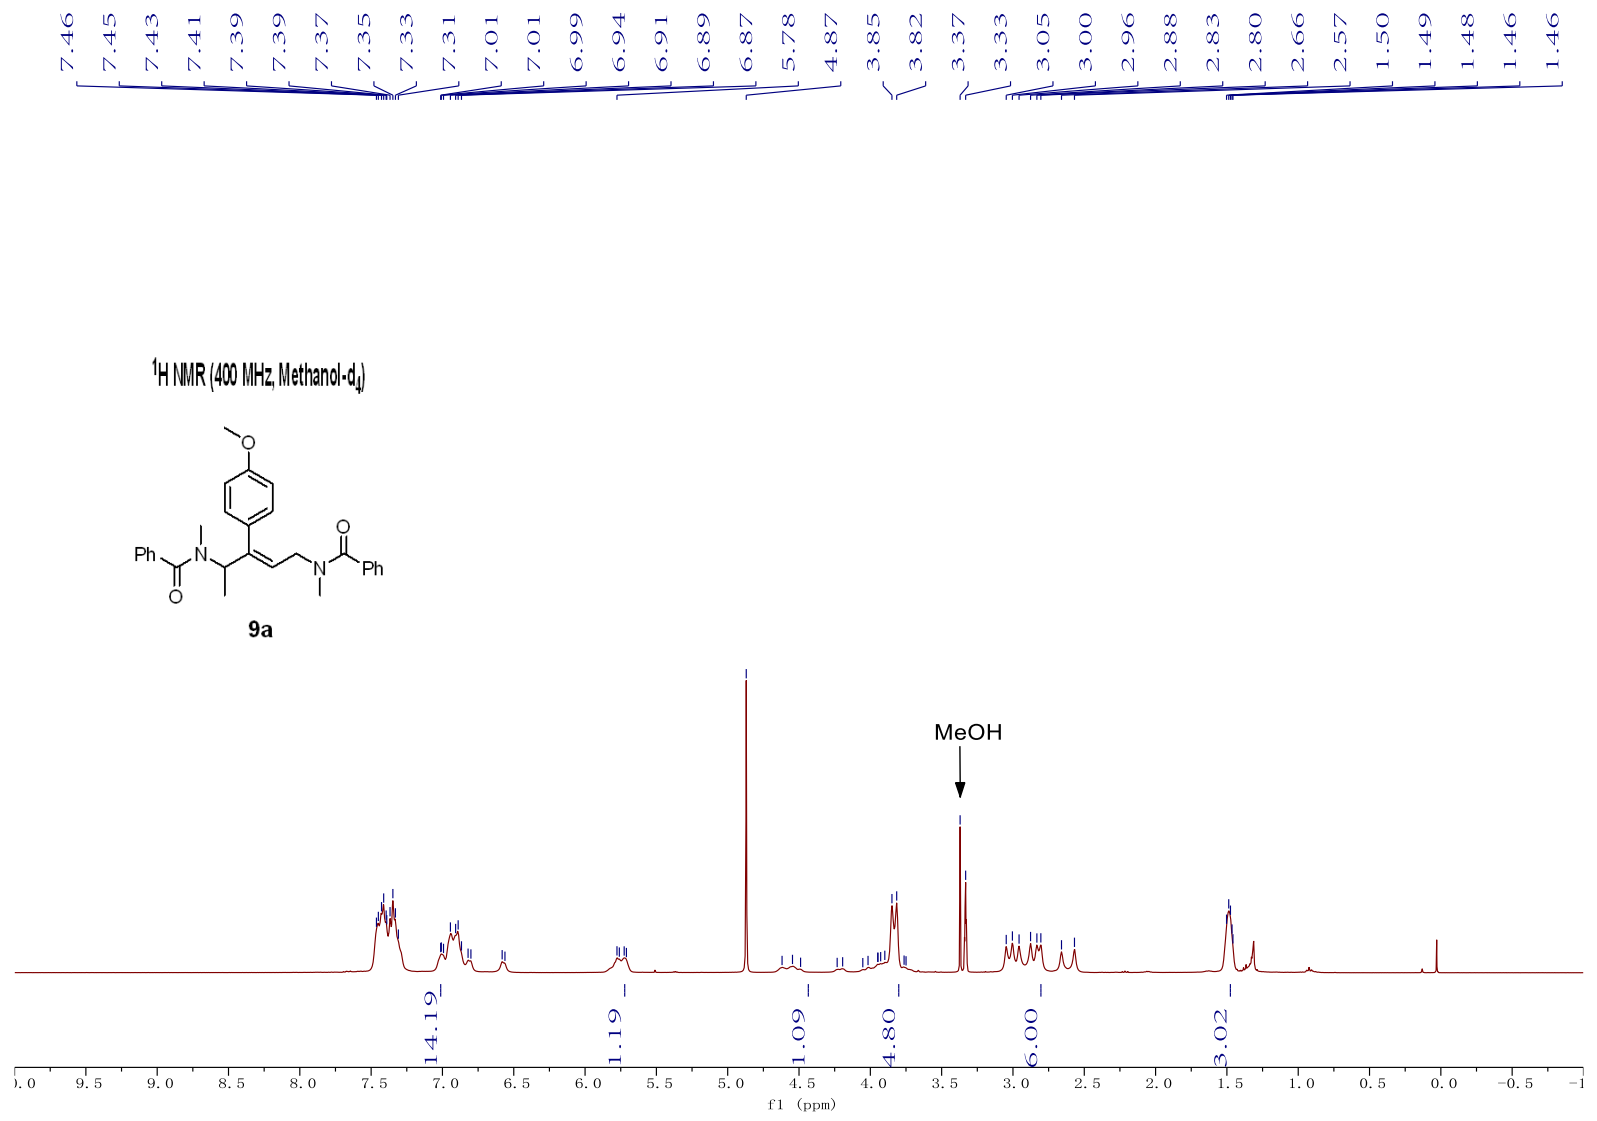

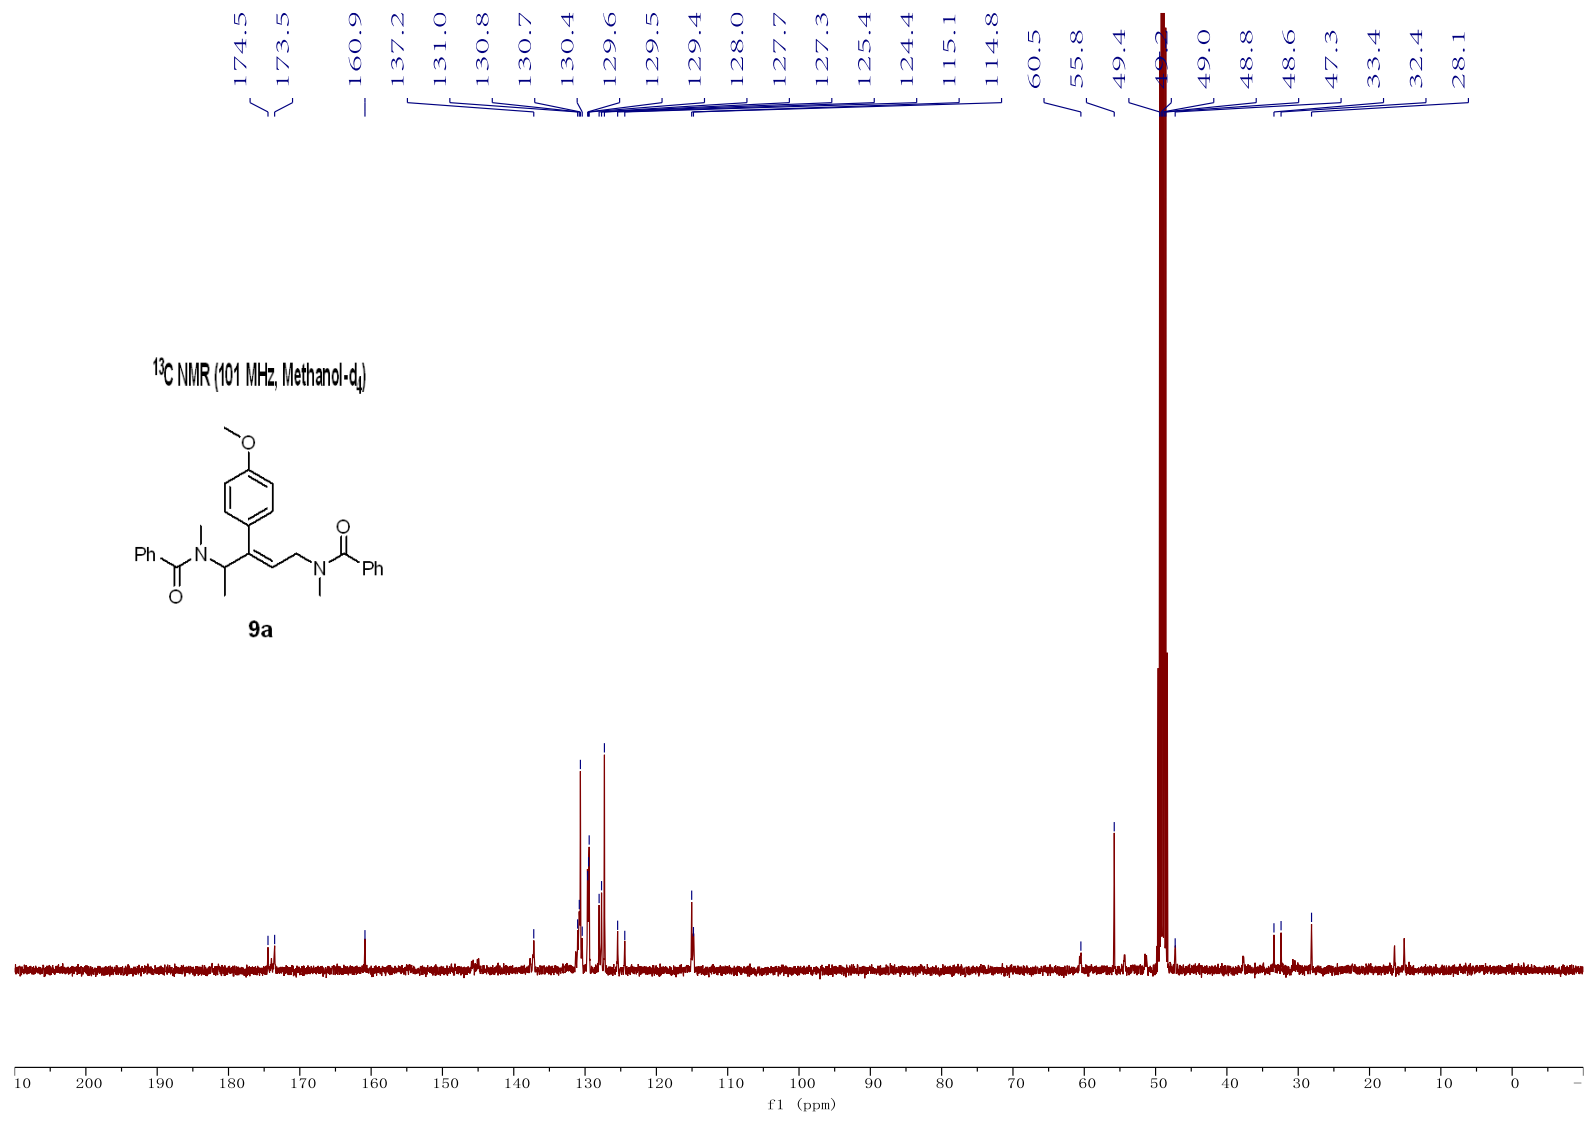

Supplement: d4qo00826j1.pdf [file d4qo00826j1.pdf]
